# Supplementary material
Source: PubMed Central journal article supplement (PMC2683082)
Supplement: 0902340106_0902340106SI.pdf [file 0902340106_0902340106SI.pdf]

# Supporting Information

Wei et al. 10.1073/pnas.0902340106

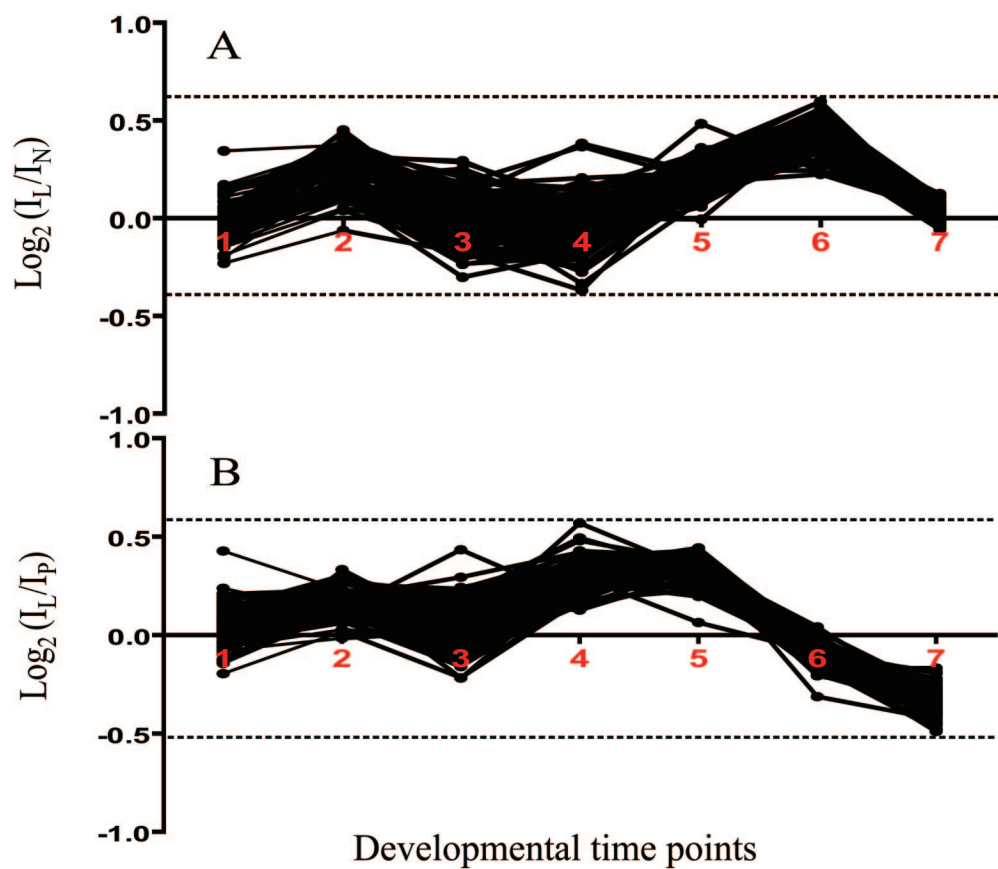

**Fig. S1.** Expression profile of a polyubiquitin gene (AK062354). All copies of polyubiquitin genes in the array showed an almost identical expression pattern, indicating the reproducibility and homogeneity of the array data. I denote the normalized expression intensity in the array. N, L, and P stand for *93-11*, *LYP9*, and *PA64s*, respectively. Numbers 1–7 denote samples from the following tissues in order: seedling shoot, leaf at tillering stage, flag leaf at booting stage, flag leaf at heading stage, flag leaf at flowering stage, flag leaf at filling stage, and panicle at filling stage.



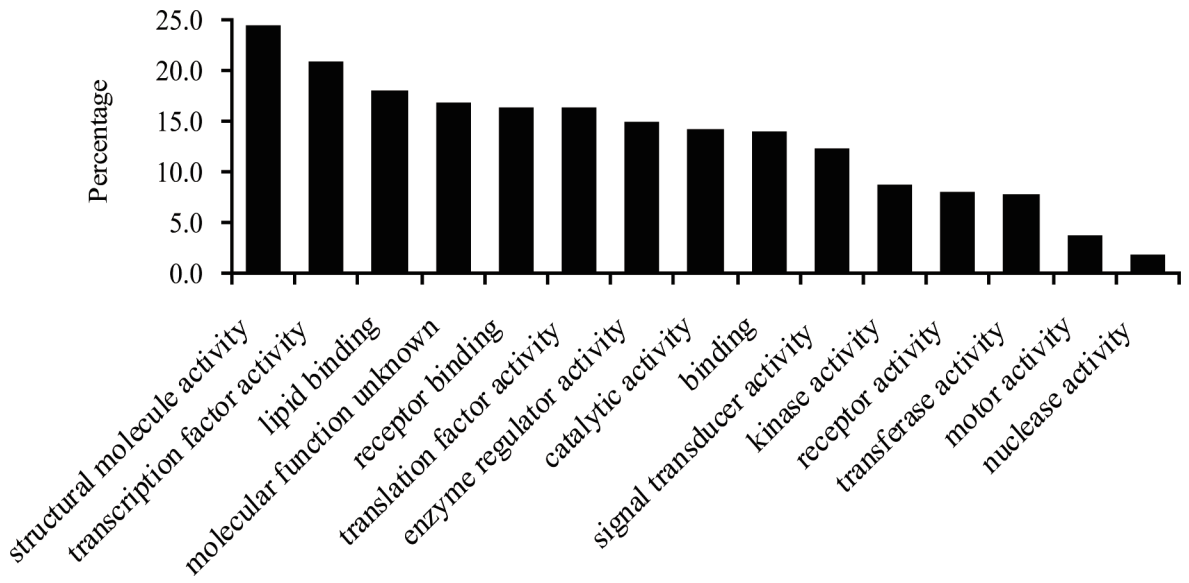

Fig. S3. Gene Ontology analysis of all expressed genes in LYP9 hybrid combination along all sample points based on plantGoslim.



**Table S1. Number of expressed and enriched genes**

| Sample  | L/N    | L/P    | Overlap | Total  | Enriched |
|---------|--------|--------|---------|--------|----------|
| S1      | 14,280 | 14,374 | 14,197  | 14,457 | 405      |
| S2      | 12,478 | 11,934 | 11,852  | 12,560 | 255      |
| S3      | 14,250 | 14,084 | 13,921  | 14,413 | 22       |
| S4      | 14,196 | 13,829 | 13,776  | 14,249 | 48       |
| S5      | 14,592 | 12,835 | 11,962  | 15,465 | 197      |
| S6      | 11,721 | 11,448 | 10,860  | 12,309 | 75       |
| S7      | 14,102 | 14,298 | 13,646  | 14,754 | 453      |
| Overlap | 7,582  | 7,332  | 7,078   | -      | -        |
| Total   | 21,871 | 20,716 | 20,321  | 22,266 | 1,455    |

N, L, and P stand for *93-11*, *LYP9*, and *PA64s*, respectively. S1–S7 denote the 7 plant samples used in the study: S1, seedling shoot; S2, leaf at tillering stage; S3, flag leaf at booting stage; S4, flag leaf at heading stage; S5, flag leaf at flowering stage; S6, flag leaf at filling stage; and S7, panicle at filling stage.





**Table S4. Percentage of DG<sub>HP</sub> in QTL-containing genes**

| No. of genes in QTL | No. of QTLs | No. of DG <sub>HP</sub> | No. of genes | %     |
|---------------------|-------------|-------------------------|--------------|-------|
| ≈ 1–10              | 2,461       | 61                      | 518          | 11.78 |
| ≈ 11–50             | 236         | 277                     | 2,756        | 10.05 |
| ≈ 51–100            | 324         | 693                     | 6,951        | 9.97  |
| ≈ 101–200           | 649         | 1,618                   | 17,137       | 9.44  |
| ≈ 201–500           | 973         | 2,568                   | 27,353       | 9.39  |
| > 500               | 598         | 2,636                   | 28,152       | 9.36  |
| Overall             | 5,241       | 3,187                   | 36,926       | 8.63  |

## Other Supporting Information Files

[Dataset S1 \(PDF\)](#)
