# Supplementary material
Source: PubMed Central journal article supplement (PMC2683082)
Supplement: 0902340106_SD1_PDF.pdf [file 0902340106_SD1_PDF.pdf]

## Dataset S1. List of differentially expressed genes among LYP9 hybrid triad.

N, L, and P stand for 93-11, LYP9, and PA64s, respectively. S1-S7 denote the seven plant samples used in the study: (S1) seedling shoot, (S2) leaf at tillering stage, (S3) flag leaf at booting stage, (S4) flag leaf at heading stage, (S5) flag leaf at flowering stage, (S6) flag leaf at filling stage, and (S7) panicle at filling stage. DG<sub>HP</sub> refer to DG between the hybrid and parent, DG<sub>PP</sub> refers to DG between 2 parents. DG<sub>HPU</sub> denote the unique portion of DG<sub>HP</sub>, and DG<sub>O</sub> denote the overlap between DG<sub>HP</sub> and DG<sub>PP</sub>.

| DG category      | GeneID      | Tissue | log2(L/N) | log2(L/P) | N flag | N.intens | L flag | L.intens | P flag | P.intens | TIGR5 ID         |
|------------------|-------------|--------|-----------|-----------|--------|----------|--------|----------|--------|----------|------------------|
| DG <sub>HP</sub> | Os000012_01 | S1     | 0.000     | 1.206     | P      | 212.478  | P      | 389.260  | P      | 168.712  | LOC_Os02g45180.1 |
| DG <sub>HP</sub> | Os000047_01 | S1     | 0.000     | 0.944     | P      | 450.813  | P      | 253.701  | P      | 131.838  | -                |
| DG <sub>HP</sub> | Os000070_01 | S1     | 1.090     | 0.000     | P      | 531.699  | P      | 1131.719 | P      | 1171.645 | LOC_Os04g33750.1 |
| DG <sub>HP</sub> | Os000102_01 | S1     | 0.000     | 0.908     | P      | 369.136  | P      | 403.302  | P      | 214.914  | LOC_Os03g05520.1 |
| DG <sub>HP</sub> | Os000189_01 | S1     | 1.176     | 0.000     | P      | 639.947  | P      | 1445.913 | P      | 1267.844 | LOC_Os12g05430.1 |
| DG <sub>HP</sub> | Os000206_02 | S1     | 0.000     | 0.786     | P      | 367.522  | P      | 352.187  | P      | 204.265  | -                |
| DG <sub>HP</sub> | Os000230_01 | S1     | 0.000     | 0.820     | P      | 2051.740 | P      | 1918.516 | P      | 1086.768 | -                |
| DG <sub>HP</sub> | Os000258_01 | S1     | 1.019     | 0.000     | P      | 158.982  | P      | 322.212  | P      | 366.201  | LOC_Os02g51320.1 |
| DG <sub>HP</sub> | Os000282_01 | S1     | 0.000     | 0.788     | P      | 5842.859 | P      | 4795.546 | P      | 2777.642 | LOC_Os03g60100.1 |
| DG <sub>HP</sub> | Os000365_01 | S1     | 0.000     | 0.924     | P      | 1451.266 | P      | 1611.526 | P      | 849.118  | LOC_Os01g05970.1 |
| DG <sub>HP</sub> | Os000411_01 | S1     | 0.000     | 0.907     | P      | 1005.735 | P      | 1424.082 | P      | 759.413  | LOC_Os01g05970.1 |
| DG <sub>HP</sub> | Os000594_01 | S1     | 1.144     | 0.000     | P      | 409.067  | P      | 904.214  | P      | 1014.858 | LOC_Os04g29550.1 |
| DG <sub>HP</sub> | Os000618_01 | S1     | 1.067     | 0.000     | P      | 290.287  | P      | 607.979  | P      | 535.543  | LOC_Os05g45730.1 |
| DG <sub>HP</sub> | Os000689_01 | S1     | 0.000     | 0.830     | P      | 388.427  | P      | 278.771  | P      | 156.791  | LOC_Os02g32990.1 |
| DG <sub>HP</sub> | Os000849_01 | S1     | 0.000     | 1.049     | P      | 203.757  | P      | 202.010  | P      | 97.645   | LOC_Os09g34850.3 |
| DG <sub>HP</sub> | Os000896_01 | S1     | 0.000     | 1.089     | P      | 559.446  | P      | 392.030  | P      | 184.281  | LOC_Os01g67220.2 |
| DG <sub>HP</sub> | Os000902_01 | S1     | 0.000     | 1.212     | P      | 517.527  | P      | 497.745  | P      | 214.892  | LOC_Os03g53360.1 |
| DG <sub>HP</sub> | Os000941_01 | S1     | 0.000     | 0.843     | P      | 353.221  | P      | 293.404  | P      | 163.522  | LOC_Os03g43390.2 |
| DG <sub>HP</sub> | Os001058_01 | S1     | 0.000     | 2.311     | P      | 1059.820 | P      | 1230.114 | P      | 247.920  | LOC_Os07g10540.1 |
| DG <sub>HP</sub> | Os001096_01 | S1     | 1.090     | 0.000     | P      | 200.089  | P      | 425.837  | P      | 405.266  | LOC_Os12g06670.1 |
| DG <sub>HP</sub> | Os001104_01 | S1     | 0.000     | 0.865     | P      | 260.528  | P      | 285.710  | P      | 156.843  | LOC_Os01g46700.1 |
| DG <sub>HP</sub> | Os001540_01 | S1     | 0.000     | 0.856     | P      | 411.077  | P      | 558.161  | P      | 308.280  | LOC_Os09g32532.2 |
| DG <sub>HP</sub> | Os001714_01 | S1     | 0.000     | 0.894     | P      | 421.843  | P      | 306.341  | P      | 164.859  | LOC_Os08g02370.1 |

|                  |             |    |        |        |   |          |   |           |   |           |                  |
|------------------|-------------|----|--------|--------|---|----------|---|-----------|---|-----------|------------------|
| DG <sub>HP</sub> | Os001842_01 | S1 | 1.458  | 0.000  | P | 688.677  | P | 1892.617  | P | 1404.539  | -                |
| DG <sub>HP</sub> | Os001890_01 | S1 | 1.052  | 0.000  | P | 912.295  | P | 1891.077  | P | 2030.809  | LOC_Os04g47690.1 |
| DG <sub>HP</sub> | Os001925_01 | S1 | 0.000  | 0.995  | P | 495.900  | P | 295.835   | P | 148.398   | LOC_Os06g03860.1 |
| DG <sub>HP</sub> | Os001927_01 | S1 | -0.949 | 0.000  | P | 369.595  | P | 191.387   | P | 210.375   | LOC_Os04g41640.1 |
| DG <sub>HP</sub> | Os001934_01 | S1 | 10.000 | 1.198  | A | 66.990   | P | 1443.393  | P | 629.167   | -                |
| DG <sub>HP</sub> | Os001942_01 | S1 | 1.162  | 0.000  | P | 4710.273 | P | 10542.619 | P | 11547.437 | -                |
| DG <sub>HP</sub> | Os002024_01 | S1 | -0.934 | 0.000  | P | 833.721  | P | 436.279   | P | 310.708   | LOC_Os01g69110.1 |
| DG <sub>HP</sub> | Os002197_01 | S1 | 0.000  | 3.483  | P | 1324.305 | P | 1508.359  | P | 134.928   | LOC_Os01g63250.1 |
| DG <sub>HP</sub> | Os002221_01 | S1 | -1.134 | 0.000  | P | 402.875  | P | 183.540   | P | 180.464   | LOC_Os06g13280.1 |
| DG <sub>HP</sub> | Os002233_01 | S1 | -1.163 | 1.082  | P | 682.767  | P | 304.986   | P | 144.044   | -                |
| DG <sub>HP</sub> | Os002390_01 | S1 | -1.045 | 0.000  | P | 9139.813 | P | 4428.212  | P | 5421.586  | LOC_Os07g05360.1 |
| DG <sub>HP</sub> | Os002678_01 | S1 | -1.773 | 0.000  | P | 3930.918 | P | 1150.031  | P | 1262.263  | LOC_Os05g03920.1 |
| DG <sub>HP</sub> | Os002898_01 | S1 | 0.000  | 0.820  | P | 367.858  | P | 294.788   | P | 166.995   | LOC_Os11g11330.1 |
| DG <sub>HP</sub> | Os003257_01 | S1 | 1.225  | 0.000  | P | 101.690  | P | 237.635   | P | 210.770   | -                |
| DG <sub>HP</sub> | Os003627_01 | S1 | 0.000  | 1.029  | P | 809.352  | P | 1002.355  | P | 491.129   | LOC_Os01g53070.1 |
| DG <sub>HP</sub> | Os003650_01 | S1 | 0.000  | 1.016  | P | 398.040  | P | 297.926   | P | 147.338   | LOC_Os03g15740.1 |
| DG <sub>HP</sub> | Os004301_01 | S1 | -1.157 | 0.000  | P | 401.623  | P | 180.128   | P | 150.419   | LOC_Os05g07870.1 |
| DG <sub>HP</sub> | Os004399_01 | S1 | -1.333 | 0.000  | P | 1035.240 | P | 410.999   | P | 424.879   | LOC_Os02g40180.1 |
| DG <sub>HP</sub> | Os005094_01 | S1 | 0.000  | 1.064  | P | 231.912  | P | 346.970   | P | 165.978   | -                |
| DG <sub>HP</sub> | Os005192_01 | S1 | 0.000  | 0.851  | P | 374.779  | P | 363.463   | P | 201.455   | -                |
| DG <sub>HP</sub> | Os005941_01 | S1 | -1.211 | 0.000  | P | 6052.839 | P | 2615.074  | P | 3065.435  | LOC_Os09g31300.1 |
| DG <sub>HP</sub> | Os005944_01 | S1 | -1.375 | 0.000  | P | 9786.161 | P | 3772.870  | P | 4178.792  | LOC_Os04g51070.1 |
| DG <sub>HP</sub> | Os005953_01 | S1 | -1.224 | 0.000  | P | 7388.129 | P | 3162.921  | P | 3893.111  | LOC_Os06g30020.1 |
| DG <sub>HP</sub> | Os005956_01 | S1 | -1.280 | 0.000  | P | 4321.024 | P | 1778.774  | P | 2284.113  | LOC_Os03g18710.1 |
| DG <sub>HP</sub> | Os005967_01 | S1 | -0.955 | 0.000  | P | 7556.380 | P | 3899.198  | P | 5372.963  | LOC_Os07g08360.1 |
| DG <sub>HP</sub> | Os005968_01 | S1 | -1.112 | 0.000  | P | 2330.198 | P | 1077.722  | P | 1183.181  | LOC_Os06g03750.1 |
| DG <sub>HP</sub> | Os006051_01 | S1 | 0.000  | -0.963 | P | 489.732  | P | 766.692   | P | 1494.345  | LOC_Os07g04480.1 |
| DG <sub>HP</sub> | Os006128_01 | S1 | 0.000  | 0.794  | P | 450.971  | P | 297.398   | P | 171.514   | -                |
| DG <sub>HP</sub> | Os006571_01 | S1 | 1.344  | 0.000  | P | 1897.148 | P | 4814.787  | P | 2969.595  | LOC_Os05g01350.1 |
| DG <sub>HP</sub> | Os006587_01 | S1 | 0.000  | 1.932  | P | 914.366  | P | 994.293   | P | 260.538   | -                |
| DG <sub>HP</sub> | Os007729_01 | S1 | -0.938 | 0.000  | P | 533.984  | P | 278.677   | P | 180.918   | LOC_Os09g29380.1 |

|                  |             |    |        |        |   |          |   |          |   |           |                   |
|------------------|-------------|----|--------|--------|---|----------|---|----------|---|-----------|-------------------|
| DG <sub>HP</sub> | Os007934_01 | S1 | -0.916 | 0.000  | P | 749.668  | P | 397.344  | P | 390.733   | -                 |
| DG <sub>HP</sub> | Os008188_01 | S1 | 0.000  | 0.913  | P | 179.118  | P | 217.201  | P | 115.311   | LOC_Os08g37250.1  |
| DG <sub>HP</sub> | Os008199_01 | S1 | -1.038 | 0.000  | P | 1791.806 | P | 872.442  | P | 841.524   | LOC_Os11g44990.1  |
| DG <sub>HP</sub> | Os008420_01 | S1 | -0.966 | 0.000  | P | 540.110  | P | 276.577  | P | 293.032   | LOC_Os04g37619.1  |
| DG <sub>HP</sub> | Os008450_01 | S1 | 0.000  | 1.327  | P | 1870.112 | P | 1299.194 | P | 517.827   | LOC_Os01g67980.1  |
| DG <sub>HP</sub> | Os008529_01 | S1 | 1.050  | 0.000  | P | 424.146  | P | 878.421  | P | 738.679   | LOC_Os07g02210.2  |
| DG <sub>HP</sub> | Os008640_01 | S1 | -0.864 | 0.891  | P | 3854.051 | P | 2117.552 | P | 1142.229  | LOC_Os02g32814.1  |
| DG <sub>HP</sub> | Os008704_01 | S1 | 0.000  | 0.962  | P | 481.960  | P | 534.872  | P | 274.664   | -                 |
| DG <sub>HP</sub> | Os008720_01 | S1 | 3.038  | -0.950 | P | 99.696   | P | 818.586  | P | 1581.209  | -                 |
| DG <sub>HP</sub> | Os008724_01 | S1 | 0.000  | -0.726 | P | 316.936  | P | 293.019  | P | 484.639   | LOC_Os05g49970.2  |
| DG <sub>HP</sub> | Os008778_01 | S1 | -1.063 | 0.000  | P | 8660.005 | P | 4145.750 | P | 4254.268  | LOC_Os05g31000.1  |
| DG <sub>HP</sub> | Os008799_01 | S1 | 0.000  | 0.876  | P | 459.750  | P | 404.871  | P | 220.628   | LOC_Os07g16950.5  |
| DG <sub>HP</sub> | Os008824_01 | S1 | 0.000  | 0.866  | P | 541.545  | P | 691.350  | P | 379.299   | -                 |
| DG <sub>HP</sub> | Os008842_01 | S1 | -0.943 | 0.000  | P | 870.263  | P | 452.584  | P | 319.567   | LOC_Os11g39020.1  |
| DG <sub>HP</sub> | Os008886_01 | S1 | -0.925 | 0.000  | P | 461.600  | P | 243.036  | P | 210.965   | LOC_Os11g10990.1  |
| DG <sub>HP</sub> | Os008928_01 | S1 | 0.000  | 1.089  | P | 386.760  | P | 362.513  | P | 170.405   | LOC_Os03g59710.1  |
| DG <sub>HP</sub> | Os008934_01 | S1 | 0.000  | 0.827  | P | 728.756  | P | 486.996  | P | 274.503   | LOC_Os02g15640.1  |
| DG <sub>HP</sub> | Os009036_01 | S1 | -0.901 | 0.000  | P | 6155.835 | P | 3297.667 | P | 3281.993  | LOC_Os12g30540.1  |
| DG <sub>HP</sub> | Os009044_01 | S1 | 1.444  | 0.000  | P | 296.144  | P | 805.906  | P | 475.773   | -                 |
| DG <sub>HP</sub> | Os009054_01 | S1 | 1.288  | 0.000  | P | 232.160  | P | 566.924  | P | 568.276   | LOC_Os02g49790.1  |
| DG <sub>HP</sub> | Os009065_01 | S1 | 0.000  | 0.827  | P | 275.207  | P | 285.243  | P | 160.779   | LOC_Os10g05680.1  |
| DG <sub>HP</sub> | Os009088_01 | S1 | -1.045 | 0.000  | P | 1424.774 | P | 690.477  | P | 847.495   | LOC_Os05g12400.1  |
| DG <sub>HP</sub> | Os009529_01 | S1 | -0.866 | 0.000  | P | 435.757  | P | 239.115  | P | 195.673   | LOC_Os10g40934.10 |
| DG <sub>HP</sub> | Os009688_01 | S1 | 10.000 | -0.946 | A | 70.486   | P | 9522.597 | P | 18351.131 | LOC_Os01g55650.1  |
| DG <sub>HP</sub> | Os009739_01 | S1 | 0.000  | 0.918  | P | 315.321  | P | 579.669  | P | 306.756   | LOC_Os01g01650.1  |
| DG <sub>HP</sub> | Os009767_01 | S1 | -0.947 | 0.000  | P | 870.479  | P | 451.571  | P | 379.890   | LOC_Os04g32270.2  |
| DG <sub>HP</sub> | Os009904_01 | S1 | -1.029 | 0.000  | P | 2041.387 | P | 1000.171 | P | 782.862   | LOC_Os07g07540.1  |
| DG <sub>HP</sub> | Os009951_01 | S1 | 0.000  | 0.810  | P | 342.003  | P | 343.553  | P | 195.993   | LOC_Os03g06950.1  |
| DG <sub>HP</sub> | Os009997_01 | S1 | 1.048  | 1.041  | P | 153.771  | P | 317.954  | P | 154.570   | LOC_Os12g26220.1  |
| DG <sub>HP</sub> | Os010115_01 | S1 | -0.885 | 0.000  | P | 4007.438 | P | 2170.135 | P | 1902.452  | LOC_Os09g36040.1  |
| DG <sub>HP</sub> | Os010136_01 | S1 | -1.157 | 0.000  | P | 681.602  | P | 305.582  | P | 392.250   | LOC_Os11g06730.1  |

|                  |             |    |        |        |   |           |   |           |   |           |                  |
|------------------|-------------|----|--------|--------|---|-----------|---|-----------|---|-----------|------------------|
| DG <sub>HP</sub> | Os010157_01 | S1 | 10.000 | 1.130  | A | 49.842    | P | 322.537   | P | 147.402   | LOC_Os01g26070.1 |
| DG <sub>HP</sub> | Os010211_01 | S1 | 1.179  | 0.801  | P | 249.817   | P | 565.455   | P | 324.442   | LOC_Os10g41800.1 |
| DG <sub>HP</sub> | Os010232_01 | S1 | -1.079 | 0.000  | P | 2442.499  | P | 1156.511  | P | 1796.324  | LOC_Os07g01630.1 |
| DG <sub>HP</sub> | Os010262_01 | S1 | 1.329  | 0.000  | P | 102.248   | P | 256.852   | P | 197.172   | LOC_Os07g45790.1 |
| DG <sub>HP</sub> | Os010390_01 | S1 | 0.000  | 0.803  | P | 441.758   | P | 325.170   | P | 186.315   | LOC_Os05g48160.1 |
| DG <sub>HP</sub> | Os010460_01 | S1 | 0.000  | 1.254  | P | 842.853   | P | 836.939   | P | 351.031   | -                |
| DG <sub>HP</sub> | Os010785_01 | S1 | 0.000  | 1.035  | P | 613.483   | P | 630.910   | P | 307.937   | LOC_Os05g35540.1 |
| DG <sub>HP</sub> | Os010823_01 | S1 | 1.255  | 0.000  | P | 174.353   | P | 416.211   | P | 420.425   | LOC_Os01g29180.1 |
| DG <sub>HP</sub> | Os010912_01 | S1 | -0.952 | 0.000  | P | 710.929   | P | 367.574   | P | 429.487   | LOC_Os06g23870.1 |
| DG <sub>HP</sub> | Os010932_01 | S1 | 0.000  | 0.872  | P | 239.752   | P | 258.884   | P | 141.437   | -                |
| DG <sub>HP</sub> | Os010947_01 | S1 | -0.922 | 0.000  | P | 1248.435  | P | 658.960   | P | 665.466   | -                |
| DG <sub>HP</sub> | Os010948_01 | S1 | -1.300 | 0.826  | P | 5351.654  | P | 2172.887  | P | 1225.654  | LOC_Os03g03724.2 |
| DG <sub>HP</sub> | Os010958_01 | S1 | 2.084  | 0.000  | P | 10410.444 | P | 44140.317 | P | 26221.862 | LOC_Os06g11860.1 |
| DG <sub>HP</sub> | Os011001_01 | S1 | -1.147 | 0.000  | P | 628.781   | P | 283.927   | P | 270.157   | LOC_Os05g46480.4 |
| DG <sub>HP</sub> | Os011020_01 | S1 | -1.020 | 0.000  | P | 548.756   | P | 270.610   | P | 252.534   | LOC_Os08g39090.1 |
| DG <sub>HP</sub> | Os011314_01 | S1 | 1.309  | 0.000  | P | 122.346   | P | 303.207   | P | 338.620   | LOC_Os06g08910.3 |
| DG <sub>HP</sub> | Os011327_01 | S1 | -0.910 | -1.318 | P | 653.451   | P | 347.861   | P | 867.080   | LOC_Os02g31030.1 |
| DG <sub>HP</sub> | Os011344_01 | S1 | 0.000  | 1.125  | P | 1080.729  | P | 881.183   | P | 404.015   | -                |
| DG <sub>HP</sub> | Os011362_01 | S1 | 1.149  | 0.000  | P | 352.192   | P | 781.014   | P | 734.236   | -                |
| DG <sub>HP</sub> | Os011415_01 | S1 | 1.348  | 0.000  | P | 1751.895  | P | 4460.180  | P | 3247.262  | LOC_Os12g10604.1 |
| DG <sub>HP</sub> | Os011527_01 | S1 | 1.170  | 0.000  | P | 102.766   | P | 231.287   | P | 178.313   | LOC_Os04g42444.1 |
| DG <sub>HP</sub> | Os011633_01 | S1 | 0.000  | -0.700 | P | 526.827   | P | 663.158   | P | 1077.243  | LOC_Os12g15470.2 |
| DG <sub>HP</sub> | Os011820_01 | S1 | 2.356  | 0.000  | P | 103.607   | P | 530.261   | P | 558.188   | -                |
| DG <sub>HP</sub> | Os012152_01 | S1 | -1.204 | 0.000  | P | 1190.163  | P | 516.647   | P | 377.237   | LOC_Os01g18800.1 |
| DG <sub>HP</sub> | Os012218_01 | S1 | -1.163 | 1.193  | P | 1745.023  | P | 779.485   | P | 340.823   | LOC_Os02g41550.3 |
| DG <sub>HP</sub> | Os012411_01 | S1 | 1.027  | 0.000  | P | 155.831   | P | 317.552   | P | 227.710   | LOC_Os01g65250.1 |
| DG <sub>HP</sub> | Os012425_01 | S1 | 1.167  | 0.000  | P | 91.580    | P | 205.630   | P | 223.725   | -                |
| DG <sub>HP</sub> | Os012547_01 | S1 | -1.211 | 0.867  | P | 1004.468  | P | 433.879   | P | 237.912   | LOC_Os02g10350.1 |
| DG <sub>HP</sub> | Os012571_01 | S1 | -0.967 | 0.000  | P | 384.171   | P | 196.588   | P | 150.932   | LOC_Os05g05590.1 |
| DG <sub>HP</sub> | Os012627_01 | S1 | 0.000  | -0.660 | P | 155.604   | P | 192.273   | P | 303.892   | LOC_Os06g08720.2 |
| DG <sub>HP</sub> | Os012646_01 | S1 | 0.000  | 0.962  | P | 1207.045  | P | 786.096   | P | 403.430   | LOC_Os08g28730.1 |

|                  |             |    |        |        |   |          |   |          |   |           |                  |
|------------------|-------------|----|--------|--------|---|----------|---|----------|---|-----------|------------------|
| DG <sub>HP</sub> | Os012664_01 | S1 | -1.121 | 0.000  | P | 995.061  | P | 457.350  | P | 321.393   | LOC_Os02g52650.1 |
| DG <sub>HP</sub> | Os012670_01 | S1 | 0.000  | 0.901  | P | 756.131  | P | 640.005  | P | 342.730   | LOC_Os04g33310.1 |
| DG <sub>HP</sub> | Os012753_01 | S1 | 0.000  | -0.754 | P | 9995.127 | P | 7417.512 | P | 12507.832 | -                |
| DG <sub>HP</sub> | Os012771_01 | S1 | 1.021  | 0.000  | P | 651.004  | P | 1321.400 | P | 1092.320  | LOC_Os05g46220.1 |
| DG <sub>HP</sub> | Os012974_01 | S1 | 0.000  | -0.880 | P | 205.374  | P | 192.031  | P | 353.340   | LOC_Os09g31430.1 |
| DG <sub>HP</sub> | Os013133_01 | S1 | -1.121 | 0.000  | P | 5656.898 | P | 2601.248 | P | 3039.598  | LOC_Os03g02560.1 |
| DG <sub>HP</sub> | Os013156_01 | S1 | -0.961 | 0.000  | P | 512.843  | P | 263.482  | P | 195.587   | LOC_Os03g62240.1 |
| DG <sub>HP</sub> | Os013246_01 | S1 | -0.957 | 0.000  | P | 413.848  | P | 213.160  | P | 259.840   | LOC_Os11g11000.2 |
| DG <sub>HP</sub> | Os013247_01 | S1 | 1.059  | 0.000  | P | 91.028   | P | 189.672  | P | 163.591   | LOC_Os03g58720.1 |
| DG <sub>HP</sub> | Os013279_01 | S1 | -1.403 | 0.000  | P | 862.909  | P | 326.256  | P | 315.496   | LOC_Os07g35480.3 |
| DG <sub>HP</sub> | Os013495_01 | S1 | 0.000  | -0.657 | P | 320.273  | P | 208.308  | P | 328.513   | LOC_Os08g01390.1 |
| DG <sub>HP</sub> | Os013532_01 | S1 | -1.318 | 0.000  | P | 1290.829 | P | 517.750  | P | 354.659   | LOC_Os01g55094.2 |
| DG <sub>HP</sub> | Os013652_01 | S1 | 0.000  | 0.893  | P | 953.492  | P | 621.192  | P | 334.578   | LOC_Os04g51120.1 |
| DG <sub>HP</sub> | Os013718_01 | S1 | -0.915 | 0.000  | P | 592.100  | P | 314.063  | P | 218.810   | LOC_Os07g31850.1 |
| DG <sub>HP</sub> | Os013723_01 | S1 | -1.054 | 0.000  | P | 493.883  | P | 237.838  | P | 190.337   | LOC_Os03g62370.1 |
| DG <sub>HP</sub> | Os013959_01 | S1 | -0.896 | 0.000  | P | 1436.509 | P | 772.203  | P | 653.320   | LOC_Os01g31870.1 |
| DG <sub>HP</sub> | Os014085_01 | S1 | 1.450  | 0.000  | P | 206.733  | P | 564.854  | P | 610.746   | -                |
| DG <sub>HP</sub> | Os014099_01 | S1 | 1.066  | 0.000  | P | 115.661  | P | 242.084  | P | 149.967   | LOC_Os12g07120.1 |
| DG <sub>HP</sub> | Os014111_01 | S1 | 1.109  | 0.000  | P | 102.639  | P | 221.364  | P | 183.277   | LOC_Os03g40110.1 |
| DG <sub>HP</sub> | Os014289_01 | S1 | 1.464  | 0.000  | P | 99.232   | P | 273.685  | P | 341.221   | LOC_Os07g26000.1 |
| DG <sub>HP</sub> | Os014364_01 | S1 | 1.207  | 0.000  | P | 158.973  | P | 367.012  | P | 528.587   | LOC_Os01g45914.1 |
| DG <sub>HP</sub> | Os014422_01 | S1 | -0.908 | -0.786 | P | 417.096  | P | 222.214  | P | 383.154   | -                |
| DG <sub>HP</sub> | Os014458_01 | S1 | 1.175  | 0.000  | P | 86.976   | P | 196.444  | P | 180.871   | -                |
| DG <sub>HP</sub> | Os014522_01 | S1 | -0.965 | 0.000  | P | 1165.401 | P | 596.998  | P | 467.530   | LOC_Os08g14450.1 |
| DG <sub>HP</sub> | Os014557_01 | S1 | 1.618  | 0.000  | P | 183.180  | P | 562.076  | P | 559.693   | LOC_Os03g22620.1 |
| DG <sub>HP</sub> | Os014887_01 | S1 | 1.651  | 0.000  | P | 194.991  | P | 612.259  | P | 859.407   | LOC_Os04g25740.1 |
| DG <sub>HP</sub> | Os014900_01 | S1 | 1.096  | 1.172  | P | 552.480  | P | 1181.056 | P | 524.150   | LOC_Os04g40700.3 |
| DG <sub>HP</sub> | Os015021_01 | S1 | -1.363 | 0.000  | P | 1861.891 | P | 724.098  | P | 609.587   | LOC_Os10g29502.1 |
| DG <sub>HP</sub> | Os015538_01 | S1 | -0.897 | 0.000  | P | 329.244  | P | 176.778  | P | 186.489   | LOC_Os10g09090.1 |
| DG <sub>HP</sub> | Os015562_01 | S1 | -1.279 | 0.000  | P | 697.990  | P | 287.546  | P | 281.731   | LOC_Os12g05730.1 |
| DG <sub>HP</sub> | Os015663_01 | S1 | 1.123  | 0.000  | P | 104.193  | P | 226.986  | P | 160.262   | LOC_Os11g02379.1 |

|                  |             |    |        |        |   |           |   |          |   |          |                  |
|------------------|-------------|----|--------|--------|---|-----------|---|----------|---|----------|------------------|
| DG <sub>HP</sub> | Os015693_01 | S1 | 1.059  | 0.000  | P | 475.684   | P | 991.148  | P | 1134.704 | LOC_Os10g11354.1 |
| DG <sub>HP</sub> | Os015702_01 | S1 | 0.000  | -0.760 | P | 218.465   | P | 188.230  | P | 318.693  | LOC_Os01g03310.1 |
| DG <sub>HP</sub> | Os015744_01 | S1 | -0.906 | 0.000  | P | 681.351   | P | 363.639  | P | 260.106  | LOC_Os04g54790.1 |
| DG <sub>HP</sub> | Os016085_01 | S1 | 1.155  | 1.395  | P | 538.404   | P | 1198.685 | P | 455.750  | LOC_Os09g12150.1 |
| DG <sub>HP</sub> | Os016154_01 | S1 | 1.288  | 0.000  | P | 86.404    | P | 210.936  | P | 191.191  | LOC_Os12g23780.2 |
| DG <sub>HP</sub> | Os016542_01 | S1 | -0.892 | 0.000  | P | 790.105   | P | 425.726  | P | 299.675  | LOC_Os05g14270.1 |
| DG <sub>HP</sub> | Os016689_01 | S1 | 0.000  | 1.301  | P | 656.576   | P | 412.027  | P | 167.176  | LOC_Os08g01514.1 |
| DG <sub>HP</sub> | Os016738_01 | S1 | -0.948 | 0.000  | P | 428.547   | P | 222.191  | P | 176.185  | LOC_Os02g28900.1 |
| DG <sub>HP</sub> | Os016806_01 | S1 | 0.000  | -0.872 | P | 181.520   | P | 194.299  | P | 355.595  | LOC_Os02g39840.1 |
| DG <sub>HP</sub> | Os016966_01 | S1 | 0.000  | 0.915  | P | 9418.272  | P | 6536.519 | P | 3466.939 | LOC_Os04g32850.2 |
| DG <sub>HP</sub> | Os017226_01 | S1 | 0.000  | -0.712 | P | 160.464   | P | 216.175  | P | 354.222  | LOC_Os07g30090.1 |
| DG <sub>HP</sub> | Os017352_01 | S1 | 1.282  | 1.642  | P | 1196.981  | P | 2910.788 | P | 932.967  | -                |
| DG <sub>HP</sub> | Os017372_01 | S1 | -1.282 | 0.000  | P | 547.300   | P | 224.989  | P | 176.878  | LOC_Os11g45720.1 |
| DG <sub>HP</sub> | Os017668_01 | S1 | -1.135 | 0.000  | P | 403.846   | P | 183.877  | P | 136.629  | LOC_Os05g47442.1 |
| DG <sub>HP</sub> | Os017708_01 | S1 | 1.326  | 0.000  | P | 96.177    | P | 241.076  | P | 183.425  | -                |
| DG <sub>HP</sub> | Os017718_01 | S1 | 1.087  | 0.000  | P | 1149.950  | P | 2442.862 | P | 2309.835 | -                |
| DG <sub>HP</sub> | Os018215_01 | S1 | 1.875  | 1.189  | P | 131.930   | P | 484.052  | P | 212.328  | LOC_Os10g10130.2 |
| DG <sub>HP</sub> | Os018485_01 | S1 | -0.870 | 0.000  | P | 339.725   | P | 185.936  | P | 197.936  | LOC_Os10g02350.1 |
| DG <sub>HP</sub> | Os018489_01 | S1 | 0.000  | 0.820  | P | 128.452   | P | 139.396  | P | 78.986   | LOC_Os10g37430.1 |
| DG <sub>HP</sub> | Os018524_01 | S1 | 0.000  | -0.683 | P | 963.423   | P | 925.394  | P | 1485.617 | LOC_Os05g07050.1 |
| DG <sub>HP</sub> | Os018691_01 | S1 | 0.000  | -0.747 | P | 217.147   | P | 184.546  | P | 309.641  | LOC_Os03g08430.1 |
| DG <sub>HP</sub> | Os018865_01 | S1 | -0.917 | 0.000  | P | 1078.773  | P | 571.220  | P | 420.235  | -                |
| DG <sub>HP</sub> | Os018960_01 | S1 | -0.934 | 0.000  | P | 10755.259 | P | 5628.481 | P | 5664.740 | LOC_Os03g52840.1 |
| DG <sub>HP</sub> | Os018984_01 | S1 | -0.892 | 0.000  | P | 728.793   | P | 392.810  | P | 252.029  | LOC_Os06g03600.2 |
| DG <sub>HP</sub> | Os019058_01 | S1 | 1.026  | 0.000  | P | 667.065   | P | 1358.390 | P | 1304.745 | LOC_Os06g02370.1 |
| DG <sub>HP</sub> | Os019083_01 | S1 | 0.000  | 1.164  | P | 370.038   | P | 329.987  | P | 147.238  | LOC_Os05g22960.1 |
| DG <sub>HP</sub> | Os019163_01 | S1 | -1.318 | 0.000  | P | 5798.130  | P | 2325.419 | P | 1938.652 | LOC_Os01g08560.2 |
| DG <sub>HP</sub> | Os019366_01 | S1 | 0.000  | 0.938  | P | 496.568   | P | 361.001  | P | 188.468  | LOC_Os03g13590.1 |
| DG <sub>HP</sub> | Os019413_01 | S1 | -1.440 | 0.000  | P | 4021.955  | P | 1482.302 | P | 1058.172 | LOC_Os07g49110.1 |
| DG <sub>HP</sub> | Os019560_01 | S1 | 1.395  | 0.000  | P | 117.374   | P | 308.776  | P | 314.552  | LOC_Os10g03850.1 |
| DG <sub>HP</sub> | Os019665_01 | S1 | -0.886 | 0.930  | P | 1853.723  | P | 1003.409 | P | 526.652  | -                |

|                  |             |    |        |        |   |          |   |          |   |          |                  |
|------------------|-------------|----|--------|--------|---|----------|---|----------|---|----------|------------------|
| DG <sub>HP</sub> | Os019688_01 | S1 | -1.007 | 0.000  | P | 4389.057 | P | 2183.423 | P | 1975.435 | LOC_Os04g02820.2 |
| DG <sub>HP</sub> | Os019935_01 | S1 | 0.000  | 0.890  | P | 890.251  | P | 662.130  | P | 357.258  | LOC_Os05g48700.1 |
| DG <sub>HP</sub> | Os019937_01 | S1 | 1.853  | -0.796 | P | 239.398  | P | 864.682  | P | 1501.364 | LOC_Os10g03750.1 |
| DG <sub>HP</sub> | Os020077_01 | S1 | 0.000  | 0.877  | P | 1673.338 | P | 1389.619 | P | 756.789  | LOC_Os07g37800.1 |
| DG <sub>HP</sub> | Os020281_01 | S1 | -0.938 | 0.000  | P | 2197.120 | P | 1147.097 | P | 916.115  | LOC_Os03g64130.1 |
| DG <sub>HP</sub> | Os020332_01 | S1 | -0.859 | 0.000  | P | 1129.825 | P | 622.857  | P | 400.861  | LOC_Os03g47580.1 |
| DG <sub>HP</sub> | Os020363_01 | S1 | -0.866 | 0.000  | P | 457.231  | P | 250.837  | P | 322.682  | LOC_Os02g21260.1 |
| DG <sub>HP</sub> | Os020394_01 | S1 | 1.017  | 0.000  | P | 100.144  | P | 202.639  | P | 169.150  | LOC_Os12g41200.1 |
| DG <sub>HP</sub> | Os020445_01 | S1 | -0.885 | 0.000  | P | 1133.251 | P | 613.840  | P | 447.670  | LOC_Os06g43210.1 |
| DG <sub>HP</sub> | Os020797_01 | S1 | -0.879 | 0.000  | P | 460.712  | P | 250.527  | P | 320.937  | LOC_Os04g05650.1 |
| DG <sub>HP</sub> | Os020872_01 | S1 | 0.000  | 0.914  | P | 432.553  | P | 304.069  | P | 161.410  | LOC_Os01g72870.2 |
| DG <sub>HP</sub> | Os021073_01 | S1 | 1.020  | 0.000  | P | 994.449  | P | 2016.143 | P | 2564.343 | LOC_Os02g39000.1 |
| DG <sub>HP</sub> | Os021187_01 | S1 | 0.000  | 1.285  | P | 520.828  | P | 977.596  | P | 401.095  | LOC_Os03g49260.1 |
| DG <sub>HP</sub> | Os021479_01 | S1 | 1.971  | 0.000  | P | 78.898   | P | 309.280  | P | 299.695  | LOC_Os04g09654.1 |
| DG <sub>HP</sub> | Os021798_01 | S1 | 0.000  | 0.793  | P | 151.599  | P | 198.839  | P | 114.759  | LOC_Os11g08380.1 |
| DG <sub>HP</sub> | Os022134_01 | S1 | 0.000  | -0.770 | P | 498.985  | P | 373.693  | P | 637.328  | LOC_Os03g22010.1 |
| DG <sub>HP</sub> | Os022279_01 | S1 | 0.000  | 0.899  | P | 130.600  | P | 230.425  | P | 123.565  | LOC_Os08g31850.1 |
| DG <sub>HP</sub> | Os022367_01 | S1 | 0.000  | 0.805  | P | 165.402  | P | 194.471  | P | 111.313  | LOC_Os02g03730.1 |
| DG <sub>HP</sub> | Os022874_01 | S1 | 0.000  | 0.853  | P | 239.432  | P | 271.577  | P | 150.316  | -                |
| DG <sub>HP</sub> | Os022964_01 | S1 | -0.950 | 0.000  | P | 482.605  | P | 249.773  | P | 200.499  | LOC_Os06g28060.1 |
| DG <sub>HP</sub> | Os023453_01 | S1 | 0.000  | 0.817  | P | 158.265  | P | 163.778  | P | 92.978   | LOC_Os03g06610.1 |
| DG <sub>HP</sub> | Os023514_01 | S1 | -0.953 | 0.842  | P | 1908.699 | P | 985.749  | P | 549.922  | LOC_Os05g35050.1 |
| DG <sub>HP</sub> | Os023663_01 | S1 | 0.000  | 0.881  | P | 411.320  | P | 549.951  | P | 298.548  | LOC_Os07g18560.1 |
| DG <sub>HP</sub> | Os023734_01 | S1 | 10.000 | -0.851 | A | 44.833   | P | 294.489  | P | 531.230  | LOC_Os02g11870.1 |
| DG <sub>HP</sub> | Os023881_01 | S1 | 1.384  | 0.000  | P | 130.789  | P | 341.301  | P | 371.086  | LOC_Os03g53690.1 |
| DG <sub>HP</sub> | Os024073_01 | S1 | 1.680  | 0.000  | P | 183.162  | P | 586.849  | P | 391.013  | -                |
| DG <sub>HP</sub> | Os024086_01 | S1 | -1.461 | 0.000  | P | 1622.368 | P | 589.174  | P | 668.320  | LOC_Os10g25310.1 |
| DG <sub>HP</sub> | Os024099_01 | S1 | -1.053 | 0.000  | P | 691.883  | P | 333.422  | P | 412.431  | LOC_Os01g51690.1 |
| DG <sub>HP</sub> | Os024208_01 | S1 | -1.349 | 0.000  | P | 1553.087 | P | 609.795  | P | 763.346  | -                |
| DG <sub>HP</sub> | Os024527_01 | S1 | 0.000  | -0.947 | P | 724.836  | P | 604.824  | P | 1166.408 | LOC_Os03g18230.1 |
| DG <sub>HP</sub> | Os024704_01 | S1 | 0.000  | 0.833  | P | 325.525  | P | 443.020  | P | 248.617  | -                |

|                  |             |    |        |        |   |          |   |          |   |          |                  |
|------------------|-------------|----|--------|--------|---|----------|---|----------|---|----------|------------------|
| DG <sub>HP</sub> | Os024737_01 | S1 | 1.723  | 0.000  | P | 116.011  | P | 382.861  | P | 271.857  | LOC_Os01g01660.1 |
| DG <sub>HP</sub> | Os024814_01 | S1 | 1.246  | 0.000  | P | 226.027  | P | 536.048  | P | 373.681  | LOC_Os09g07150.1 |
| DG <sub>HP</sub> | Os024906_01 | S1 | 0.000  | 0.883  | P | 583.231  | P | 623.730  | P | 338.241  | -                |
| DG <sub>HP</sub> | Os024920_01 | S1 | 0.000  | -0.660 | P | 1140.147 | P | 754.750  | P | 1192.631 | LOC_Os03g53340.3 |
| DG <sub>HP</sub> | Os025209_01 | S1 | 1.056  | 0.000  | P | 151.009  | P | 313.875  | P | 218.564  | LOC_Os10g05600.1 |
| DG <sub>HP</sub> | Os025501_01 | S1 | 1.338  | 0.000  | P | 170.295  | P | 430.653  | P | 491.452  | LOC_Os04g48410.1 |
| DG <sub>HP</sub> | Os025786_01 | S1 | -0.883 | 0.000  | P | 400.040  | P | 216.903  | P | 156.076  | -                |
| DG <sub>HP</sub> | Os025787_01 | S1 | 1.857  | 1.626  | P | 2666.693 | P | 9662.293 | P | 3131.332 | LOC_Os12g04980.1 |
| DG <sub>HP</sub> | Os025872_01 | S1 | 0.000  | 0.982  | P | 129.752  | P | 225.501  | P | 114.136  | LOC_Os11g01450.1 |
| DG <sub>HP</sub> | Os026790_01 | S1 | -0.891 | 0.000  | P | 760.140  | P | 409.942  | P | 567.824  | LOC_Os05g06120.1 |
| DG <sub>HP</sub> | Os027175_01 | S1 | 1.047  | 0.000  | P | 341.099  | P | 704.777  | P | 721.234  | -                |
| DG <sub>HP</sub> | Os027821_01 | S1 | -0.899 | 0.000  | P | 847.586  | P | 454.506  | P | 438.149  | LOC_Os07g37730.1 |
| DG <sub>HP</sub> | Os028048_01 | S1 | 3.841  | -0.730 | P | 155.028  | P | 2221.735 | P | 3685.582 | LOC_Os09g16300.1 |
| DG <sub>HP</sub> | Os028210_01 | S1 | 0.000  | 0.887  | P | 167.644  | P | 245.268  | P | 132.649  | LOC_Os01g65810.1 |
| DG <sub>HP</sub> | Os028344_01 | S1 | -1.010 | 0.000  | P | 560.207  | P | 278.166  | P | 220.980  | LOC_Os01g45970.1 |
| DG <sub>HP</sub> | Os028450_01 | S1 | -1.014 | -0.889 | P | 397.629  | P | 196.942  | P | 364.621  | LOC_Os04g45350.1 |
| DG <sub>HP</sub> | Os028543_01 | S1 | 10.000 | 0.994  | A | 85.694   | P | 299.417  | P | 150.333  | LOC_Os03g47890.1 |
| DG <sub>HP</sub> | Os028605_01 | S1 | -1.127 | 0.000  | P | 1588.857 | P | 727.447  | P | 1041.329 | LOC_Os02g06380.1 |
| DG <sub>HP</sub> | Os028680_01 | S1 | 10.000 | -0.804 | A | 52.557   | P | 1073.510 | P | 1873.680 | LOC_Os07g06100.1 |
| DG <sub>HP</sub> | Os029050_01 | S1 | 0.000  | 0.984  | P | 413.318  | P | 699.255  | P | 353.510  | LOC_Os10g35260.1 |
| DG <sub>HP</sub> | Os029140_01 | S1 | 0.000  | 0.849  | P | 952.462  | P | 678.873  | P | 376.907  | LOC_Os08g01520.1 |
| DG <sub>HP</sub> | Os029456_01 | S1 | -0.897 | 0.000  | P | 1178.458 | P | 632.842  | P | 725.865  | LOC_Os07g02860.1 |
| DG <sub>HP</sub> | Os029535_01 | S1 | 1.338  | 0.786  | P | 2932.328 | P | 7411.470 | P | 4297.451 | LOC_Os06g19770.1 |
| DG <sub>HP</sub> | Os029722_01 | S1 | -0.941 | 0.000  | P | 1899.630 | P | 989.603  | P | 811.223  | LOC_Os05g03600.1 |
| DG <sub>HP</sub> | Os029793_01 | S1 | 1.220  | 0.000  | P | 286.321  | P | 666.851  | P | 424.222  | LOC_Os02g57810.1 |
| DG <sub>HP</sub> | Os029843_01 | S1 | -0.879 | 0.000  | P | 725.200  | P | 394.347  | P | 334.364  | LOC_Os05g08650.1 |
| DG <sub>HP</sub> | Os030307_01 | S1 | 1.031  | 0.000  | P | 122.520  | P | 250.417  | P | 310.064  | LOC_Os07g36510.1 |
| DG <sub>HP</sub> | Os030378_01 | S1 | 0.000  | -0.668 | P | 727.480  | P | 1307.267 | P | 2077.640 | LOC_Os06g09390.2 |
| DG <sub>HP</sub> | Os030442_01 | S1 | 1.179  | 0.000  | P | 1290.820 | P | 2921.944 | P | 2332.621 | LOC_Os06g10290.1 |
| DG <sub>HP</sub> | Os030724_01 | S1 | 0.000  | -0.663 | P | 250.354  | P | 215.104  | P | 340.474  | -                |
| DG <sub>HP</sub> | Os030769_01 | S1 | 1.501  | 10.000 | P | 363.358  | P | 1028.621 | A | 279.453  | LOC_Os12g30690.1 |



|                  |             |    |        |        |   |           |   |           |   |          |                  |
|------------------|-------------|----|--------|--------|---|-----------|---|-----------|---|----------|------------------|
| DG <sub>HP</sub> | Os030806_01 | S1 | 1.084  | 0.000  | P | 1162.232  | P | 2463.721  | P | 2690.285 | -                |
| DG <sub>HP</sub> | Os030865_01 | S1 | 1.381  | 1.206  | P | 1351.743  | P | 3519.840  | P | 1526.157 | LOC_Os01g16400.1 |
| DG <sub>HP</sub> | Os031169_01 | S1 | -0.917 | 0.000  | P | 471.293   | P | 249.681   | P | 269.999  | LOC_Os10g20080.1 |
| DG <sub>HP</sub> | Os031292_01 | S1 | -0.929 | 0.000  | P | 513.849   | P | 269.817   | P | 306.771  | LOC_Os12g03570.1 |
| DG <sub>HP</sub> | Os031446_01 | S1 | 1.401  | 0.000  | P | 239.387   | P | 632.194   | P | 665.117  | -                |
| DG <sub>HP</sub> | Os031447_01 | S1 | 1.199  | -0.655 | P | 106.127   | P | 243.569   | P | 383.522  | LOC_Os01g34940.1 |
| DG <sub>HP</sub> | Os031781_01 | S1 | 0.000  | 0.903  | P | 3994.207  | P | 5355.150  | P | 2863.804 | LOC_Os06g30530.1 |
| DG <sub>HP</sub> | Os031968_01 | S1 | 1.104  | -0.656 | P | 130.321   | P | 280.149   | P | 441.502  | LOC_Os01g60520.1 |
| DG <sub>HP</sub> | Os032194_01 | S1 | 1.251  | 0.000  | P | 4380.533  | P | 10422.331 | P | 6127.250 | LOC_Os08g43530.1 |
| DG <sub>HP</sub> | Os032594_01 | S1 | 10.000 | 1.600  | A | 626.669   | P | 473.549   | P | 156.178  | LOC_Os01g33360.1 |
| DG <sub>HP</sub> | Os032996_01 | S1 | 0.000  | -0.769 | P | 817.775   | P | 848.261   | P | 1445.884 | LOC_Os04g28690.1 |
| DG <sub>HP</sub> | Os033046_01 | S1 | -1.251 | 0.000  | P | 2966.876  | P | 1246.965  | P | 1581.241 | LOC_Os10g35330.1 |
| DG <sub>HP</sub> | Os033509_01 | S1 | 0.000  | 0.962  | P | 211.546   | P | 332.218   | P | 170.597  | LOC_Os07g12130.1 |
| DG <sub>HP</sub> | Os033569_01 | S1 | -0.864 | 0.000  | P | 272.377   | P | 149.635   | P | 128.318  | LOC_Os05g25350.1 |
| DG <sub>HP</sub> | Os033744_01 | S1 | 1.054  | 0.000  | P | 149.056   | P | 309.381   | P | 342.573  | LOC_Os03g05450.1 |
| DG <sub>HP</sub> | Os033846_01 | S1 | 1.508  | -1.046 | P | 118.698   | P | 337.538   | P | 696.752  | LOC_Os03g51570.1 |
| DG <sub>HP</sub> | Os033901_01 | S1 | 0.000  | -0.715 | P | 1438.041  | P | 1095.161  | P | 1797.086 | LOC_Os02g47490.1 |
| DG <sub>HP</sub> | Os034073_01 | S1 | -0.967 | 0.000  | P | 630.457   | P | 322.542   | P | 403.433  | -                |
| DG <sub>HP</sub> | Os034452_01 | S1 | 0.000  | 0.898  | P | 429.609   | P | 294.928   | P | 158.291  | LOC_Os09g02350.1 |
| DG <sub>HP</sub> | Os034533_01 | S1 | 1.134  | 0.000  | P | 124.307   | P | 272.827   | P | 290.160  | LOC_Os05g12270.1 |
| DG <sub>HP</sub> | Os034649_01 | S1 | -1.360 | 0.000  | P | 12694.203 | P | 4945.043  | P | 6342.399 | LOC_Os11g47980.1 |
| DG <sub>HP</sub> | Os034673_01 | S1 | -0.942 | 0.000  | P | 690.523   | P | 359.322   | P | 362.011  | LOC_Os06g02510.3 |
| DG <sub>HP</sub> | Os035398_01 | S1 | -1.206 | 0.000  | P | 483.947   | P | 209.802   | P | 278.468  | -                |
| DG <sub>HP</sub> | Os035905_01 | S1 | -1.138 | 0.000  | P | 920.492   | P | 418.128   | P | 320.194  | LOC_Os11g39020.1 |
| DG <sub>HP</sub> | Os036131_01 | S1 | 1.727  | 0.000  | P | 766.216   | P | 2537.060  | P | 1892.482 | -                |
| DG <sub>HP</sub> | Os036357_01 | S1 | 1.043  | 0.000  | P | 195.919   | P | 403.655   | P | 473.154  | -                |
| DG <sub>HP</sub> | Os036402_01 | S1 | 1.726  | -1.246 | P | 319.259   | P | 1056.313  | P | 2506.206 | -                |
| DG <sub>HP</sub> | Os036485_01 | S1 | 0.000  | -0.722 | P | 153.513   | P | 170.430   | P | 281.023  | LOC_Os02g19450.1 |
| DG <sub>HP</sub> | Os036725_01 | S1 | 1.528  | 0.000  | P | 209.911   | P | 605.156   | P | 623.869  | -                |
| DG <sub>HP</sub> | Os036907_01 | S1 | 1.222  | 0.000  | P | 210.638   | P | 491.353   | P | 408.486  | LOC_Os05g48780.1 |
| DG <sub>HP</sub> | Os036934_01 | S1 | 0.000  | 0.811  | P | 468.525   | P | 450.082   | P | 256.566  | -                |

|                  |             |    |        |        |   |           |   |          |   |          |                  |
|------------------|-------------|----|--------|--------|---|-----------|---|----------|---|----------|------------------|
| DG <sub>HP</sub> | Os037049_01 | S1 | 1.289  | 1.083  | P | 1283.416  | P | 3136.077 | P | 1480.331 | LOC_Os08g17980.1 |
| DG <sub>HP</sub> | Os037064_01 | S1 | 0.000  | -1.024 | P | 706.021   | P | 547.577  | P | 1113.232 | LOC_Os04g20540.1 |
| DG <sub>HP</sub> | Os037250_01 | S1 | -1.033 | 0.000  | P | 1438.481  | P | 702.915  | P | 689.477  | LOC_Os11g15180.1 |
| DG <sub>HP</sub> | Os037254_01 | S1 | -0.877 | 0.000  | P | 404.394   | P | 220.267  | P | 340.492  | LOC_Os04g27720.1 |
| DG <sub>HP</sub> | Os037297_01 | S1 | -1.333 | 0.000  | P | 831.144   | P | 329.993  | P | 391.696  | LOC_Os05g16570.1 |
| DG <sub>HP</sub> | Os037305_01 | S1 | 0.000  | 0.855  | P | 244.252   | P | 211.513  | P | 116.926  | -                |
| DG <sub>HP</sub> | Os037383_01 | S1 | 1.038  | 0.000  | P | 490.693   | P | 1007.842 | P | 1028.662 | LOC_Os07g28250.1 |
| DG <sub>HP</sub> | Os037792_01 | S1 | -1.050 | 0.000  | P | 539.208   | P | 260.404  | P | 306.897  | LOC_Os07g35860.1 |
| DG <sub>HP</sub> | Os038123_01 | S1 | -1.561 | 0.000  | P | 690.171   | P | 233.926  | P | 257.266  | LOC_Os09g09630.1 |
| DG <sub>HP</sub> | Os038209_01 | S1 | -1.358 | 0.000  | P | 882.014   | P | 344.037  | P | 411.371  | LOC_Os06g51000.1 |
| DG <sub>HP</sub> | Os038408_01 | S1 | -0.946 | 0.000  | P | 17510.729 | P | 9091.754 | P | 8573.117 | LOC_Os09g25700.1 |
| DG <sub>HP</sub> | Os038459_01 | S1 | 0.000  | 1.196  | P | 234.015   | P | 454.917  | P | 198.526  | LOC_Os03g30630.1 |
| DG <sub>HP</sub> | Os038619_01 | S1 | -0.972 | 0.000  | P | 1224.141  | P | 623.947  | P | 660.312  | -                |
| DG <sub>HP</sub> | Os039006_01 | S1 | 0.000  | 0.878  | P | 440.660   | P | 408.984  | P | 222.479  | LOC_Os06g44790.1 |
| DG <sub>HP</sub> | Os039244_01 | S1 | -0.891 | 0.000  | P | 476.279   | P | 256.862  | P | 256.507  | -                |
| DG <sub>HP</sub> | Os039379_01 | S1 | 1.036  | 0.000  | P | 440.466   | P | 903.438  | P | 735.505  | LOC_Os04g51510.1 |
| DG <sub>HP</sub> | Os039822_01 | S1 | 1.504  | 0.000  | P | 435.779   | P | 1235.731 | P | 1807.529 | LOC_Os10g10260.1 |
| DG <sub>HP</sub> | Os039861_01 | S1 | -1.082 | 0.000  | P | 410.545   | P | 193.872  | P | 151.802  | LOC_Os11g42490.1 |
| DG <sub>HP</sub> | Os039877_01 | S1 | 1.389  | 0.000  | P | 179.023   | P | 469.005  | P | 619.201  | -                |
| DG <sub>HP</sub> | Os040035_01 | S1 | 0.000  | 0.888  | P | 1064.551  | P | 812.026  | P | 438.711  | -                |
| DG <sub>HP</sub> | Os040133_01 | S1 | 1.028  | -0.657 | P | 139.654   | P | 284.811  | P | 449.148  | LOC_Os08g37050.1 |
| DG <sub>HP</sub> | Os040246_01 | S1 | -1.174 | 0.000  | P | 1905.083  | P | 844.490  | P | 929.453  | LOC_Os08g44670.1 |
| DG <sub>HP</sub> | Os040497_01 | S1 | -0.923 | 0.000  | P | 939.345   | P | 495.398  | P | 617.715  | LOC_Os12g41420.1 |
| DG <sub>HP</sub> | Os040593_01 | S1 | 0.000  | 0.973  | P | 502.467   | P | 376.674  | P | 191.851  | LOC_Os01g34614.1 |
| DG <sub>HP</sub> | Os040616_01 | S1 | -1.019 | 0.000  | P | 827.518   | P | 408.399  | P | 529.582  | LOC_Os01g44330.1 |
| DG <sub>HP</sub> | Os040850_01 | S1 | 0.000  | 0.832  | P | 322.453   | P | 214.407  | P | 120.472  | LOC_Os03g30040.1 |
| DG <sub>HP</sub> | Os040966_01 | S1 | 0.000  | 0.834  | P | 299.709   | P | 284.825  | P | 159.761  | LOC_Os11g25300.1 |
| DG <sub>HP</sub> | Os041041_01 | S1 | 1.009  | 0.000  | P | 171.522   | P | 345.170  | P | 404.729  | LOC_Os03g05600.1 |
| DG <sub>HP</sub> | Os041269_01 | S1 | 1.348  | 0.000  | P | 169.270   | P | 430.812  | P | 437.888  | LOC_Os10g01500.1 |
| DG <sub>HP</sub> | Os041419_01 | S1 | 0.000  | 0.821  | P | 121.952   | P | 167.359  | P | 94.750   | LOC_Os08g04680.1 |
| DG <sub>HP</sub> | Os041507_01 | S1 | 1.159  | 1.227  | P | 264.420   | P | 590.517  | P | 252.351  | -                |

|                  |             |    |        |        |   |          |   |          |   |          |                  |
|------------------|-------------|----|--------|--------|---|----------|---|----------|---|----------|------------------|
| DG <sub>HP</sub> | Os041666_01 | S1 | 1.344  | 0.000  | P | 97.972   | P | 248.638  | P | 210.385  | -                |
| DG <sub>HP</sub> | Os042004_01 | S1 | 0.000  | 0.791  | P | 285.185  | P | 445.551  | P | 257.489  | LOC_Os06g14640.1 |
| DG <sub>HP</sub> | Os042294_01 | S1 | 1.044  | 0.000  | P | 270.674  | P | 557.954  | P | 455.733  | LOC_Os02g13440.1 |
| DG <sub>HP</sub> | Os042647_01 | S1 | 0.000  | 1.065  | P | 556.673  | P | 399.291  | P | 190.886  | LOC_Os07g03620.1 |
| DG <sub>HP</sub> | Os042677_01 | S1 | 10.000 | 1.071  | A | 54.529   | P | 284.504  | P | 135.396  | -                |
| DG <sub>HP</sub> | Os042854_01 | S1 | 0.000  | -0.799 | P | 8504.641 | P | 5707.774 | P | 9932.865 | LOC_Os04g26880.1 |
| DG <sub>HP</sub> | Os043010_01 | S1 | 0.000  | 0.876  | P | 380.703  | P | 405.885  | P | 221.124  | LOC_Os12g33370.1 |
| DG <sub>HP</sub> | Os043245_01 | S1 | 1.220  | 0.000  | P | 786.325  | P | 1832.187 | P | 1384.507 | LOC_Os07g29530.1 |
| DG <sub>HP</sub> | Os043567_01 | S1 | 1.111  | 0.000  | P | 191.872  | P | 414.401  | P | 535.369  | LOC_Os11g17040.1 |
| DG <sub>HP</sub> | Os043773_01 | S1 | -0.942 | 0.000  | P | 2830.222 | P | 1473.104 | P | 2056.323 | LOC_Os08g09410.1 |
| DG <sub>HP</sub> | Os043831_01 | S1 | 1.459  | 0.000  | P | 98.905   | P | 271.974  | P | 251.498  | -                |
| DG <sub>HP</sub> | Os043894_01 | S1 | 1.534  | 0.000  | P | 117.549  | P | 340.427  | P | 467.084  | LOC_Os12g31000.1 |
| DG <sub>HP</sub> | Os043923_01 | S1 | 2.242  | -0.816 | P | 217.861  | P | 1030.795 | P | 1814.490 | LOC_Os02g27160.1 |
| DG <sub>HP</sub> | Os044196_01 | S1 | 1.307  | -0.724 | P | 308.682  | P | 763.698  | P | 1261.448 | LOC_Os05g32650.1 |
| DG <sub>HP</sub> | Os044283_01 | S1 | 2.519  | 0.000  | P | 297.732  | P | 1705.974 | P | 2389.160 | -                |
| DG <sub>HP</sub> | Os044284_01 | S1 | 0.000  | 1.020  | P | 215.363  | P | 270.794  | P | 133.569  | LOC_Os11g30950.1 |
| DG <sub>HP</sub> | Os044822_01 | S1 | 0.000  | 1.025  | P | 320.422  | P | 378.643  | P | 186.066  | LOC_Os08g21200.1 |
| DG <sub>HP</sub> | Os045347_01 | S1 | 3.053  | 0.000  | P | 195.087  | P | 1618.575 | P | 1676.094 | LOC_Os06g18120.1 |
| DG <sub>HP</sub> | Os045565_01 | S1 | 2.207  | 0.000  | P | 138.581  | P | 639.684  | P | 586.593  | LOC_Os10g09630.1 |
| DG <sub>HP</sub> | Os046160_01 | S1 | -1.046 | 0.000  | P | 553.072  | P | 267.945  | P | 237.917  | LOC_Os07g32440.1 |
| DG <sub>HP</sub> | Os046600_01 | S1 | 1.404  | 0.000  | P | 264.388  | P | 699.759  | P | 718.110  | -                |
| DG <sub>HP</sub> | Os047443_01 | S1 | 0.000  | 0.837  | P | 757.551  | P | 557.616  | P | 312.214  | LOC_Os05g18050.1 |
| DG <sub>HP</sub> | Os047756_01 | S1 | 1.129  | 1.223  | P | 229.402  | P | 501.732  | P | 214.941  | LOC_Os03g05070.1 |
| DG <sub>HP</sub> | Os048043_01 | S1 | 1.776  | 1.710  | P | 362.266  | P | 1240.886 | P | 379.322  | LOC_Os06g32674.1 |
| DG <sub>HP</sub> | Os048165_01 | S1 | -1.037 | 0.000  | P | 583.531  | P | 284.382  | P | 363.845  | LOC_Os04g11970.1 |
| DG <sub>HP</sub> | Os048756_01 | S1 | -1.706 | -0.725 | P | 1177.696 | P | 361.016  | P | 596.563  | LOC_Os06g23780.1 |
| DG <sub>HP</sub> | Os049257_01 | S1 | 0.000  | 0.914  | P | 259.517  | P | 275.205  | P | 146.025  | LOC_Os02g13000.1 |
| DG <sub>HP</sub> | Os049367_01 | S1 | -1.027 | 0.000  | P | 406.095  | P | 199.267  | P | 203.789  | LOC_Os03g40470.1 |
| DG <sub>HP</sub> | Os050244_01 | S1 | 0.000  | 0.833  | P | 174.860  | P | 192.137  | P | 107.885  | -                |
| DG <sub>HP</sub> | Os050919_01 | S1 | 0.000  | 0.811  | P | 271.161  | P | 288.931  | P | 164.655  | LOC_Os05g17050.1 |
| DG <sub>HP</sub> | Os051250_01 | S1 | 1.142  | 0.000  | P | 107.899  | P | 238.163  | P | 141.729  | -                |

|                  |             |    |        |        |   |           |   |           |   |           |                  |
|------------------|-------------|----|--------|--------|---|-----------|---|-----------|---|-----------|------------------|
| DG <sub>HP</sub> | Os051869_01 | S1 | -1.220 | 0.000  | P | 1714.500  | P | 735.906   | P | 944.365   | LOC_Os11g45090.1 |
| DG <sub>HP</sub> | Os051892_01 | S1 | -0.984 | 0.000  | P | 29094.231 | P | 14709.384 | P | 12238.363 | LOC_Os08g15149.1 |
| DG <sub>HP</sub> | Os051936_01 | S1 | 0.000  | 1.254  | P | 791.964   | P | 865.717   | P | 362.984   | LOC_Os10g39410.1 |
| DG <sub>HP</sub> | Os051974_01 | S1 | 0.000  | -1.279 | P | 1010.525  | P | 1083.530  | P | 2629.904  | LOC_Os01g03360.1 |
| DG <sub>HP</sub> | Os052072_01 | S1 | 0.000  | -0.861 | P | 477.142   | P | 280.929   | P | 510.302   | LOC_Os12g26290.2 |
| DG <sub>HP</sub> | Os052088_01 | S1 | 0.000  | 1.136  | P | 393.295   | P | 444.911   | P | 202.392   | LOC_Os03g14630.1 |
| DG <sub>HP</sub> | Os052235_01 | S1 | 0.000  | 1.005  | P | 663.146   | P | 512.518   | P | 255.321   | LOC_Os03g24580.1 |
| DG <sub>HP</sub> | Os052240_01 | S1 | 0.000  | -0.696 | P | 892.529   | P | 668.382   | P | 1083.058  | LOC_Os01g04050.1 |
| DG <sub>HP</sub> | Os052266_01 | S1 | 0.000  | -0.655 | P | 125.777   | P | 208.957   | P | 328.989   | LOC_Os01g40860.1 |
| DG <sub>HP</sub> | Os052281_01 | S1 | -1.178 | 0.000  | P | 6638.018  | P | 2934.571  | P | 2573.311  | LOC_Os07g46460.1 |
| DG <sub>HP</sub> | Os052305_01 | S1 | 0.000  | 0.902  | P | 274.132   | P | 264.748   | P | 141.706   | LOC_Os01g42530.1 |
| DG <sub>HP</sub> | Os052610_01 | S1 | 1.288  | 0.000  | P | 103.557   | P | 252.895   | P | 240.721   | LOC_Os06g18670.1 |
| DG <sub>HP</sub> | Os052669_01 | S1 | -0.954 | 0.000  | P | 373.403   | P | 192.693   | P | 287.387   | LOC_Os11g37970.1 |
| DG <sub>HP</sub> | Os052960_01 | S1 | 0.000  | -1.311 | P | 230.463   | P | 330.131   | P | 819.346   | LOC_Os01g12110.2 |
| DG <sub>HP</sub> | Os052967_01 | S1 | 1.086  | 0.000  | P | 125.950   | P | 267.340   | P | 226.819   | LOC_Os04g31520.1 |
| DG <sub>HP</sub> | Os053065_01 | S1 | 0.000  | 1.035  | P | 505.074   | P | 302.239   | P | 147.466   | LOC_Os01g06530.1 |
| DG <sub>HP</sub> | Os053243_01 | S1 | 1.075  | 0.000  | P | 202.891   | P | 427.455   | P | 444.189   | LOC_Os12g20310.1 |
| DG <sub>HP</sub> | Os053489_01 | S1 | 1.060  | 0.000  | P | 232.261   | P | 484.089   | P | 730.740   | LOC_Os11g17480.1 |
| DG <sub>HP</sub> | Os053691_01 | S1 | -0.864 | 0.000  | P | 382.571   | P | 210.249   | P | 219.811   | LOC_Os02g56320.1 |
| DG <sub>HP</sub> | Os053902_01 | S1 | 1.011  | 0.000  | P | 101.106   | P | 203.773   | P | 172.184   | -                |
| DG <sub>HP</sub> | Os054176_02 | S1 | -0.929 | 0.000  | P | 2288.193  | P | 1202.066  | P | 1154.102  | -                |
| DG <sub>HP</sub> | Os054423_01 | S1 | 1.104  | 0.000  | P | 201.466   | P | 433.006   | P | 317.233   | LOC_Os01g05970.1 |
| DG <sub>HP</sub> | Os054493_01 | S1 | 1.059  | 0.000  | P | 624.814   | P | 1301.405  | P | 1417.749  | LOC_Os03g22810.1 |
| DG <sub>HP</sub> | Os054592_01 | S1 | 1.185  | 0.000  | P | 658.599   | P | 1497.410  | P | 1875.829  | LOC_Os05g06310.1 |
| DG <sub>HP</sub> | Os054598_01 | S1 | 1.559  | 0.000  | P | 157.898   | P | 465.191   | P | 621.687   | LOC_Os01g07310.1 |
| DG <sub>HP</sub> | Os054602_01 | S1 | 0.000  | -0.923 | P | 426.748   | P | 478.229   | P | 906.778   | LOC_Os08g35190.2 |
| DG <sub>HP</sub> | Os054626_01 | S1 | 1.016  | 0.000  | P | 221.332   | P | 447.619   | P | 667.360   | LOC_Os03g22810.1 |
| DG <sub>HP</sub> | Os054660_01 | S1 | -1.263 | 0.000  | P | 3095.774  | P | 1289.592  | P | 975.786   | LOC_Os04g41560.2 |
| DG <sub>HP</sub> | Os054700_01 | S1 | -1.401 | 0.000  | P | 1255.861  | P | 475.687   | P | 380.561   | LOC_Os07g44330.2 |
| DG <sub>HP</sub> | Os054726_01 | S1 | 1.756  | 0.000  | P | 182.282   | P | 615.607   | P | 394.402   | LOC_Os02g13660.1 |
| DG <sub>HP</sub> | Os054741_01 | S1 | 10.000 | -0.787 | A | 70.802    | P | 340.229   | P | 586.917   | -                |

|                  |             |    |                  |        |   |                  |   |              |   |           |                  |         |               |           |
|------------------|-------------|----|------------------|--------|---|------------------|---|--------------|---|-----------|------------------|---------|---------------|-----------|
| DG <sub>HP</sub> | Os054845_01 | S1 | 1.132            | 0.000  | P | 195.281          | P | 428.081      | P | 270.699   | -                |         |               |           |
| DG <sub>HP</sub> | Os055024_01 | S1 | -1.042           | 0.000  | P | 733.388          | P | 356.084      | P | 277.515   | LOC_Os04g53310.1 |         |               |           |
| DG <sub>HP</sub> | Os055176_01 | S1 | 0.000            | 0.815  | P | 791.054          | P | 547.588      | P | 311.328   | LOC_Os07g33630.1 |         |               |           |
| DG <sub>HP</sub> | Os055515_01 | S1 | 0.000            | 0.829  | P | 295.794          | P | 263.103      | P | 148.102   | -                |         |               |           |
| DG <sub>HP</sub> | Os055586_01 | S1 | 1.113            | 0.000  | P | 116.033          | P | 250.983      | P | 262.572   | LOC_Os01g15290.2 |         |               |           |
| DG <sub>HP</sub> | Os055710_01 | S1 | 0.000            | 0.908  | P | 941.466          | P | 1146.591     | P | 611.120   | LOC_Os03g37570.1 |         |               |           |
| DG <sub>HP</sub> | Os055842_01 | S1 | 1.196            | 0.000  | P | 534.933          | P | 1225.924     | P | 1764.901  | LOC_Os01g54800.1 |         |               |           |
| DG <sub>HP</sub> | Os056418_01 | S1 | -0.902           | 0.000  | P | 603.419          | P | 322.939      | P | 291.393   | LOC_Os09g11520.1 |         |               |           |
| DG <sub>HP</sub> | Os056775_01 | S1 | 0.000            | -1.084 | P | 228.725          | P | 221.639      | P | 469.861   | LOC_Os01g71680.1 |         |               |           |
| DG <sub>HP</sub> | Os056918_02 | S1 | -2.514           | 0.000  | P | 1838.523         | P | 321.838      | P | 414.269   | LOC_Os01g13690.1 |         |               |           |
| DG <sub>HP</sub> | Os057062_02 | S1 | 0.000            | 0.948  | P | 323.268          | P | 323.830      | P | 167.868   | LOC_Os07g43350.1 |         |               |           |
| DG <sub>HP</sub> | Os057210_02 | S1 | 1.072            | 0.000  | P | 501.397          | P | 1053.768     | P | 753.566   | -                |         |               |           |
| DG <sub>HP</sub> | GeneID      | S2 | log2(Ratio(L/9)) |        |   | log2(Ratio(L/P)) |   | Ti_9311.flag |   | Ti_9311   | Ti_LYP9.flag     | Ti_LYP9 | Ti_PA64s.flag | Ti_PA64s- |
| DG <sub>HP</sub> | Os000040_01 | S2 | 0.000            | 1.335  | P | 4812.716         | P | 4390.947     | P | 1740.724  | LOC_Os01g65440.1 |         |               |           |
| DG <sub>HP</sub> | Os000060_01 | S2 | -1.126           | 0.000  | P | 680.971          | P | 312.116      | P | 223.071   | LOC_Os02g42700.1 |         |               |           |
| DG <sub>HP</sub> | Os000128_01 | S2 | 0.000            | 1.166  | P | 869.707          | P | 716.846      | P | 319.509   | LOC_Os06g12740.1 |         |               |           |
| DG <sub>HP</sub> | Os000149_01 | S2 | 0.829            | 0.000  | P | 393.932          | P | 699.713      | P | 831.599   | LOC_Os03g51960.1 |         |               |           |
| DG <sub>HP</sub> | Os000174_01 | S2 | 0.885            | 0.000  | P | 451.373          | P | 833.416      | P | 883.079   | LOC_Os04g17100.1 |         |               |           |
| DG <sub>HP</sub> | Os000177_01 | S2 | -0.842           | 0.000  | P | 772.183          | P | 430.896      | P | 427.001   | LOC_Os09g38370.1 |         |               |           |
| DG <sub>HP</sub> | Os000275_01 | S2 | -0.810           | 0.000  | P | 344.472          | P | 196.547      | P | 170.241   | -                |         |               |           |
| DG <sub>HP</sub> | Os000311_01 | S2 | 1.047            | 0.000  | P | 151.402          | P | 312.723      | P | 352.956   | LOC_Os03g49170.1 |         |               |           |
| DG <sub>HP</sub> | Os000431_01 | S2 | 0.000            | -1.003 | P | 8539.232         | P | 9276.806     | P | 18598.622 | LOC_Os01g68300.1 |         |               |           |
| DG <sub>HP</sub> | Os000594_01 | S2 | 1.574            | 0.000  | P | 137.948          | P | 410.795      | P | 535.090   | LOC_Os04g29550.1 |         |               |           |
| DG <sub>HP</sub> | Os000741_01 | S2 | -1.077           | 0.000  | P | 263.024          | P | 124.648      | P | 157.762   | LOC_Os08g25820.2 |         |               |           |
| DG <sub>HP</sub> | Os001020_01 | S2 | 0.000            | 0.903  | P | 185.397          | P | 202.279      | P | 108.192   | LOC_Os08g44170.1 |         |               |           |
| DG <sub>HP</sub> | Os001058_01 | S2 | 0.808            | 0.000  | P | 362.058          | P | 633.818      | P | 725.519   | LOC_Os07g10540.1 |         |               |           |
| DG <sub>HP</sub> | Os001104_01 | S2 | 0.000            | 1.045  | P | 1260.572         | P | 805.550      | P | 390.450   | LOC_Os01g46700.1 |         |               |           |
| DG <sub>HP</sub> | Os001131_01 | S2 | 0.725            | 0.000  | P | 215.041          | P | 355.438      | P | 441.124   | LOC_Os07g43900.1 |         |               |           |
| DG <sub>HP</sub> | Os001272_01 | S2 | -0.796           | 0.000  | P | 262.317          | P | 151.045      | P | 147.655   | -                |         |               |           |
| DG <sub>HP</sub> | Os001329_01 | S2 | 0.774            | 0.000  | P | 291.486          | P | 498.386      | P | 435.111   | -                |         |               |           |
| DG <sub>HP</sub> | Os001521_01 | S2 | -2.392           | 0.989  | P | 1340.908         | P | 255.516      | P | 128.701   | LOC_Os08g37140.1 |         |               |           |

|                  |             |    |        |        |   |          |   |          |   |          |                  |
|------------------|-------------|----|--------|--------|---|----------|---|----------|---|----------|------------------|
| DG <sub>HP</sub> | Os001579_01 | S2 | 0.941  | 0.000  | P | 1474.030 | P | 2829.635 | P | 2893.292 | LOC_Os10g36170.1 |
| DG <sub>HP</sub> | Os001623_01 | S2 | 0.000  | 0.870  | P | 202.292  | P | 189.010  | P | 103.403  | LOC_Os02g30460.1 |
| DG <sub>HP</sub> | Os001674_01 | S2 | 0.000  | 0.914  | P | 859.306  | P | 1069.150 | P | 567.349  | LOC_Os03g54900.2 |
| DG <sub>HP</sub> | Os001738_01 | S2 | -0.903 | 0.000  | P | 1738.018 | P | 929.586  | P | 921.633  | LOC_Os02g41860.2 |
| DG <sub>HP</sub> | Os001920_01 | S2 | 0.000  | 2.399  | P | 5705.724 | P | 3740.308 | P | 709.175  | LOC_Os02g41580.1 |
| DG <sub>HP</sub> | Os001934_01 | S2 | 10.000 | -1.117 | A | 72.909   | P | 1388.822 | P | 3012.778 | -                |
| DG <sub>HP</sub> | Os001942_01 | S2 | 0.000  | 0.841  | P | 1495.448 | P | 1644.156 | P | 917.559  | -                |
| DG <sub>HP</sub> | Os001988_01 | S2 | 0.000  | 0.854  | P | 271.466  | P | 183.760  | P | 101.698  | LOC_Os02g29190.1 |
| DG <sub>HP</sub> | Os002001_01 | S2 | 0.865  | 0.000  | P | 218.856  | P | 398.474  | P | 375.652  | LOC_Os05g24580.1 |
| DG <sub>HP</sub> | Os002004_01 | S2 | 0.807  | 0.000  | P | 231.570  | P | 405.193  | P | 465.141  | LOC_Os11g11810.1 |
| DG <sub>HP</sub> | Os002020_01 | S2 | 0.827  | 0.000  | P | 228.058  | P | 404.697  | P | 384.225  | LOC_Os02g33710.1 |
| DG <sub>HP</sub> | Os002113_01 | S2 | 0.000  | 0.842  | P | 2766.611 | P | 2343.762 | P | 1307.102 | LOC_Os12g06780.1 |
| DG <sub>HP</sub> | Os002304_01 | S2 | 0.000  | -0.854 | P | 546.554  | P | 728.736  | P | 1316.942 | LOC_Os02g13060.1 |
| DG <sub>HP</sub> | Os002341_01 | S2 | 0.875  | 0.000  | P | 374.491  | P | 686.692  | P | 918.091  | LOC_Os11g09010.2 |
| DG <sub>HP</sub> | Os002373_01 | S2 | 0.000  | -0.680 | P | 239.599  | P | 305.573  | P | 489.469  | LOC_Os10g40390.1 |
| DG <sub>HP</sub> | Os002387_01 | S2 | 0.000  | 0.843  | P | 180.494  | P | 214.309  | P | 119.461  | -                |
| DG <sub>HP</sub> | Os002390_01 | S2 | 0.000  | 1.112  | P | 9821.673 | P | 5838.526 | P | 2700.499 | LOC_Os07g05360.1 |
| DG <sub>HP</sub> | Os002419_01 | S2 | 0.000  | -0.674 | P | 170.632  | P | 223.383  | P | 356.318  | LOC_Os08g05530.1 |
| DG <sub>HP</sub> | Os002482_01 | S2 | 0.000  | 1.052  | P | 205.032  | P | 182.112  | P | 87.814   | -                |
| DG <sub>HP</sub> | Os002486_01 | S2 | -0.847 | 10.000 | P | 351.995  | P | 195.627  | A | 78.881   | LOC_Os02g12480.1 |
| DG <sub>HP</sub> | Os002658_01 | S2 | -0.911 | 0.000  | P | 485.897  | P | 258.337  | P | 166.519  | LOC_Os02g03530.1 |
| DG <sub>HP</sub> | Os002678_01 | S2 | -1.316 | 0.000  | P | 9920.405 | P | 3984.540 | P | 4831.918 | LOC_Os05g03920.1 |
| DG <sub>HP</sub> | Os002790_01 | S2 | 0.000  | 0.868  | P | 179.048  | P | 235.112  | P | 128.796  | LOC_Os01g63150.1 |
| DG <sub>HP</sub> | Os002830_01 | S2 | 0.733  | 10.000 | P | 192.086  | P | 319.200  | A | 161.646  | LOC_Os02g18540.1 |
| DG <sub>HP</sub> | Os003032_01 | S2 | -0.900 | 0.000  | P | 311.220  | P | 166.828  | P | 142.877  | -                |
| DG <sub>HP</sub> | Os003185_01 | S2 | 0.841  | -0.768 | P | 109.873  | P | 196.816  | P | 335.239  | LOC_Os03g08640.1 |
| DG <sub>HP</sub> | Os003390_01 | S2 | 0.768  | -0.687 | P | 412.598  | P | 702.629  | P | 1131.117 | LOC_Os05g32390.1 |
| DG <sub>HP</sub> | Os003434_01 | S2 | -1.450 | 0.000  | P | 595.983  | P | 218.169  | P | 223.901  | LOC_Os03g48170.1 |
| DG <sub>HP</sub> | Os003956_02 | S2 | -0.790 | 10.000 | P | 415.590  | P | 240.281  | A | 38.582   | -                |
| DG <sub>HP</sub> | Os004125_01 | S2 | 0.000  | -0.684 | P | 745.165  | P | 703.953  | P | 1130.876 | LOC_Os06g03050.1 |
| DG <sub>HP</sub> | Os004249_01 | S2 | 0.000  | 1.641  | P | 462.328  | P | 400.687  | P | 128.456  | LOC_Os11g47140.1 |

|                  |             |    |        |        |   |           |   |           |   |           |                  |
|------------------|-------------|----|--------|--------|---|-----------|---|-----------|---|-----------|------------------|
| DG <sub>HP</sub> | Os004343_01 | S2 | 0.996  | 0.000  | P | 219.900   | P | 438.601   | P | 583.246   | LOC_Os06g14030.1 |
| DG <sub>HP</sub> | Os004399_01 | S2 | 0.000  | 2.316  | P | 1562.590  | P | 980.961   | P | 197.025   | LOC_Os02g40180.1 |
| DG <sub>HP</sub> | Os004929_01 | S2 | -0.828 | 0.000  | P | 521.178   | P | 293.578   | P | 248.059   | LOC_Os07g40150.1 |
| DG <sub>HP</sub> | Os005136_01 | S2 | 0.000  | -0.684 | P | 173.741   | P | 260.654   | P | 418.890   | LOC_Os04g31120.6 |
| DG <sub>HP</sub> | Os005767_01 | S2 | 0.000  | -0.650 | P | 18623.435 | P | 24846.606 | P | 38981.765 | LOC_Os02g47744.4 |
| DG <sub>HP</sub> | Os006051_01 | S2 | -0.854 | 0.000  | P | 242.051   | P | 133.892   | P | 150.950   | LOC_Os07g04480.1 |
| DG <sub>HP</sub> | Os006506_01 | S2 | 1.002  | 0.000  | P | 143.393   | P | 287.222   | P | 356.571   | LOC_Os02g06290.1 |
| DG <sub>HP</sub> | Os006571_01 | S2 | 0.000  | -0.767 | P | 2824.017  | P | 1851.499  | P | 3151.483  | LOC_Os05g01350.1 |
| DG <sub>HP</sub> | Os008101_01 | S2 | 0.823  | 0.000  | P | 188.851   | P | 334.184   | P | 318.734   | LOC_Os01g48380.1 |
| DG <sub>HP</sub> | Os008169_01 | S2 | -1.221 | 1.080  | P | 1563.154  | P | 670.691   | P | 317.158   | LOC_Os02g40240.2 |
| DG <sub>HP</sub> | Os008199_01 | S2 | 0.000  | 0.949  | P | 945.125   | P | 915.135   | P | 474.116   | LOC_Os11g44990.1 |
| DG <sub>HP</sub> | Os008400_01 | S2 | -0.877 | 0.000  | P | 1263.825  | P | 688.378   | P | 473.356   | LOC_Os02g57720.1 |
| DG <sub>HP</sub> | Os008441_01 | S2 | 0.000  | 0.929  | P | 620.052   | P | 395.600   | P | 207.758   | LOC_Os03g49190.1 |
| DG <sub>HP</sub> | Os008529_01 | S2 | 1.468  | 0.000  | P | 229.908   | P | 635.877   | P | 828.697   | LOC_Os07g02210.2 |
| DG <sub>HP</sub> | Os008556_01 | S2 | 0.000  | -0.644 | P | 3047.467  | P | 3908.624  | P | 6109.320  | LOC_Os02g44630.2 |
| DG <sub>HP</sub> | Os008773_01 | S2 | 0.773  | 0.000  | P | 472.699   | P | 807.797   | P | 938.789   | LOC_Os02g07160.1 |
| DG <sub>HP</sub> | Os008778_01 | S2 | -0.797 | 0.000  | P | 3201.480  | P | 1842.754  | P | 1611.789  | LOC_Os05g31000.1 |
| DG <sub>HP</sub> | Os008853_01 | S2 | 0.000  | -0.766 | P | 227.477   | P | 310.795   | P | 528.388   | LOC_Os06g10620.1 |
| DG <sub>HP</sub> | Os008919_01 | S2 | -0.793 | 0.000  | P | 513.053   | P | 296.029   | P | 255.250   | LOC_Os08g06360.1 |
| DG <sub>HP</sub> | Os008934_01 | S2 | 0.000  | -0.749 | P | 246.582   | P | 373.254   | P | 627.401   | LOC_Os02g15640.1 |
| DG <sub>HP</sub> | Os008961_01 | S2 | 0.746  | 0.000  | P | 277.846   | P | 465.851   | P | 601.809   | -                |
| DG <sub>HP</sub> | Os008978_01 | S2 | 0.866  | 10.000 | P | 94.819    | P | 172.818   | A | 160.103   | LOC_Os02g57050.1 |
| DG <sub>HP</sub> | Os009024_01 | S2 | 0.000  | -0.754 | P | 552.643   | P | 785.035   | P | 1324.264  | LOC_Os07g08710.2 |
| DG <sub>HP</sub> | Os009036_01 | S2 | -0.793 | 0.000  | P | 6631.681  | P | 3826.836  | P | 2803.127  | LOC_Os12g30540.1 |
| DG <sub>HP</sub> | Os009088_01 | S2 | 0.000  | -0.955 | P | 1365.976  | P | 856.595   | P | 1660.485  | LOC_Os05g12400.1 |
| DG <sub>HP</sub> | Os009117_01 | S2 | 1.194  | 0.000  | P | 5888.157  | P | 13475.150 | P | 10637.784 | LOC_Os12g02320.1 |
| DG <sub>HP</sub> | Os009172_01 | S2 | 0.859  | 0.000  | P | 179.879   | P | 326.363   | P | 310.219   | LOC_Os02g36940.1 |
| DG <sub>HP</sub> | Os009220_01 | S2 | 1.034  | 0.000  | P | 161.893   | P | 331.437   | P | 351.755   | LOC_Os03g50210.1 |
| DG <sub>HP</sub> | Os009234_01 | S2 | 0.819  | 0.000  | P | 2640.032  | P | 4656.287  | P | 6056.968  | LOC_Os08g06530.1 |
| DG <sub>HP</sub> | Os009260_01 | S2 | 0.775  | 0.000  | P | 144.928   | P | 247.917   | P | 248.822   | LOC_Os03g37130.1 |
| DG <sub>HP</sub> | Os009272_01 | S2 | 0.000  | -0.858 | P | 395.475   | P | 324.349   | P | 587.850   | LOC_Os03g29970.1 |

|                  |             |    |        |        |   |          |   |          |   |           |                  |
|------------------|-------------|----|--------|--------|---|----------|---|----------|---|-----------|------------------|
| DG <sub>HP</sub> | Os009342_01 | S2 | 1.237  | 1.371  | P | 218.365  | P | 514.791  | P | 199.008   | LOC_Os08g09860.1 |
| DG <sub>HP</sub> | Os009360_01 | S2 | 0.758  | 0.000  | P | 1323.600 | P | 2238.162 | P | 2293.045  | LOC_Os05g23740.1 |
| DG <sub>HP</sub> | Os009448_01 | S2 | 0.756  | 0.000  | P | 5892.618 | P | 9950.476 | P | 14471.962 | LOC_Os08g02630.1 |
| DG <sub>HP</sub> | Os009500_01 | S2 | 0.996  | 0.000  | P | 158.325  | P | 315.838  | P | 367.741   | LOC_Os08g32850.2 |
| DG <sub>HP</sub> | Os009518_01 | S2 | 0.803  | 0.000  | P | 5031.132 | P | 8775.875 | P | 11337.086 | LOC_Os01g73250.1 |
| DG <sub>HP</sub> | Os009547_01 | S2 | 1.025  | 0.000  | P | 180.377  | P | 367.108  | P | 407.847   | LOC_Os01g13570.1 |
| DG <sub>HP</sub> | Os009592_01 | S2 | 0.976  | 0.000  | P | 505.379  | P | 994.172  | P | 1375.536  | LOC_Os05g40180.1 |
| DG <sub>HP</sub> | Os009657_01 | S2 | 1.362  | 0.000  | P | 512.905  | P | 1318.564 | P | 1903.777  | LOC_Os08g01140.1 |
| DG <sub>HP</sub> | Os009747_01 | S2 | -0.837 | -0.911 | P | 1532.234 | P | 857.959  | P | 1613.230  | LOC_Os05g45050.1 |
| DG <sub>HP</sub> | Os009972_01 | S2 | -0.814 | 0.000  | P | 593.288  | P | 337.430  | P | 354.588   | -                |
| DG <sub>HP</sub> | Os009986_01 | S2 | 0.000  | -0.673 | P | 318.545  | P | 395.633  | P | 630.772   | -                |
| DG <sub>HP</sub> | Os010073_01 | S2 | 2.043  | 0.000  | P | 284.179  | P | 1170.810 | P | 1613.195  | LOC_Os07g40986.1 |
| DG <sub>HP</sub> | Os010085_01 | S2 | 0.905  | 0.000  | P | 131.173  | P | 245.609  | P | 219.961   | LOC_Os01g15979.1 |
| DG <sub>HP</sub> | Os010136_01 | S2 | 0.000  | 1.554  | P | 778.352  | P | 537.416  | P | 182.994   | LOC_Os11g06730.1 |
| DG <sub>HP</sub> | Os010147_01 | S2 | 0.000  | 1.348  | P | 4786.666 | P | 4871.167 | P | 1913.979  | LOC_Os12g43670.1 |
| DG <sub>HP</sub> | Os010179_01 | S2 | 0.000  | -0.685 | P | 559.020  | P | 485.793  | P | 781.110   | LOC_Os09g30410.1 |
| DG <sub>HP</sub> | Os010193_01 | S2 | -1.134 | 10.000 | P | 376.971  | P | 171.786  | A | 183.959   | LOC_Os12g34010.1 |
| DG <sub>HP</sub> | Os010292_01 | S2 | 0.000  | -1.508 | P | 2170.424 | P | 1780.101 | P | 5064.050  | LOC_Os07g04960.1 |
| DG <sub>HP</sub> | Os010318_01 | S2 | 0.000  | -0.825 | P | 842.995  | P | 801.643  | P | 1420.618  | -                |
| DG <sub>HP</sub> | Os010394_01 | S2 | 0.000  | 0.975  | P | 576.074  | P | 589.789  | P | 300.062   | -                |
| DG <sub>HP</sub> | Os010429_01 | S2 | -0.812 | 0.000  | P | 1907.591 | P | 1086.224 | P | 899.962   | LOC_Os06g06570.1 |
| DG <sub>HP</sub> | Os010652_01 | S2 | -1.182 | 0.000  | P | 1054.527 | P | 464.902  | P | 350.553   | -                |
| DG <sub>HP</sub> | Os010714_01 | S2 | 0.000  | -0.641 | P | 678.308  | P | 473.066  | P | 737.541   | LOC_Os12g13400.1 |
| DG <sub>HP</sub> | Os010733_01 | S2 | 0.000  | -0.738 | P | 176.158  | P | 247.110  | P | 412.185   | -                |
| DG <sub>HP</sub> | Os010742_01 | S2 | 0.000  | -0.629 | P | 427.761  | P | 433.646  | P | 670.409   | LOC_Os09g29210.2 |
| DG <sub>HP</sub> | Os010797_01 | S2 | 0.000  | 0.919  | P | 222.822  | P | 230.147  | P | 121.718   | LOC_Os04g42720.1 |
| DG <sub>HP</sub> | Os010825_01 | S2 | 0.953  | 0.000  | P | 112.283  | P | 217.298  | P | 270.836   | LOC_Os03g46640.2 |
| DG <sub>HP</sub> | Os010844_01 | S2 | 0.747  | 0.000  | P | 1833.331 | P | 3077.737 | P | 3128.015  | LOC_Os03g49310.1 |
| DG <sub>HP</sub> | Os010912_01 | S2 | 0.000  | 1.045  | P | 520.237  | P | 369.368  | P | 179.058   | LOC_Os06g23870.1 |
| DG <sub>HP</sub> | Os010953_01 | S2 | 0.000  | -0.907 | P | 221.235  | P | 146.472  | P | 274.622   | LOC_Os09g15420.1 |
| DG <sub>HP</sub> | Os011001_01 | S2 | 0.000  | -0.640 | P | 336.191  | P | 258.058  | P | 402.262   | LOC_Os05g46480.4 |



|                  |             |    |        |        |   |          |   |          |   |          |                  |
|------------------|-------------|----|--------|--------|---|----------|---|----------|---|----------|------------------|
| DG <sub>HP</sub> | Os011043_01 | S2 | 0.840  | 0.000  | P | 91.853   | P | 164.421  | P | 108.341  | LOC_Os09g21770.1 |
| DG <sub>HP</sub> | Os011134_01 | S2 | 0.000  | -0.669 | P | 875.896  | P | 915.866  | P | 1456.181 | LOC_Os01g37000.1 |
| DG <sub>HP</sub> | Os011230_01 | S2 | 0.000  | 1.280  | P | 407.785  | P | 396.186  | P | 163.107  | LOC_Os08g10570.2 |
| DG <sub>HP</sub> | Os011239_01 | S2 | -0.824 | 0.000  | P | 868.972  | P | 491.014  | P | 425.172  | LOC_Os05g38720.1 |
| DG <sub>HP</sub> | Os011326_01 | S2 | 0.851  | 0.000  | P | 362.351  | P | 653.757  | P | 641.173  | LOC_Os07g37220.1 |
| DG <sub>HP</sub> | Os011344_01 | S2 | -1.205 | 0.951  | P | 1173.029 | P | 508.933  | P | 263.304  | -                |
| DG <sub>HP</sub> | Os011412_01 | S2 | 0.814  | 0.000  | P | 132.126  | P | 232.308  | P | 151.056  | LOC_Os11g37050.1 |
| DG <sub>HP</sub> | Os011415_01 | S2 | -0.800 | 0.000  | P | 3969.325 | P | 2279.582 | P | 2934.019 | LOC_Os12g10604.1 |
| DG <sub>HP</sub> | Os011457_01 | S2 | 1.051  | 0.000  | P | 294.959  | P | 610.987  | P | 613.299  | LOC_Os05g47880.1 |
| DG <sub>HP</sub> | Os011513_01 | S2 | 0.818  | 0.000  | P | 87.849   | P | 154.898  | P | 142.315  | LOC_Os09g32988.1 |
| DG <sub>HP</sub> | Os011561_01 | S2 | -1.602 | 0.000  | P | 1317.873 | P | 434.274  | P | 473.769  | LOC_Os09g10340.1 |
| DG <sub>HP</sub> | Os011628_01 | S2 | 0.000  | 0.889  | P | 343.244  | P | 318.479  | P | 171.923  | LOC_Os02g45490.4 |
| DG <sub>HP</sub> | Os011816_01 | S2 | -1.235 | 0.000  | P | 1012.188 | P | 430.078  | P | 562.708  | -                |
| DG <sub>HP</sub> | Os011893_01 | S2 | -1.078 | 0.000  | P | 390.670  | P | 185.030  | P | 180.446  | LOC_Os03g08624.1 |
| DG <sub>HP</sub> | Os011899_01 | S2 | -0.875 | 0.000  | P | 319.323  | P | 174.129  | P | 209.528  | LOC_Os04g06770.2 |
| DG <sub>HP</sub> | Os012005_01 | S2 | -0.803 | 1.414  | P | 1121.626 | P | 642.771  | P | 241.186  | LOC_Os03g58640.1 |
| DG <sub>HP</sub> | Os012218_01 | S2 | 0.000  | -0.728 | P | 352.383  | P | 257.300  | P | 426.216  | LOC_Os02g41550.3 |
| DG <sub>HP</sub> | Os012415_01 | S2 | 0.744  | 0.000  | P | 507.730  | P | 850.209  | P | 1142.878 | LOC_Os03g57310.1 |
| DG <sub>HP</sub> | Os012427_01 | S2 | 0.000  | 0.836  | P | 354.066  | P | 394.551  | P | 220.969  | LOC_Os05g25370.1 |
| DG <sub>HP</sub> | Os012534_01 | S2 | -0.862 | 0.000  | P | 290.998  | P | 160.072  | P | 161.775  | LOC_Os03g18900.1 |
| DG <sub>HP</sub> | Os012584_01 | S2 | -1.313 | 0.000  | P | 759.338  | P | 305.618  | P | 447.861  | LOC_Os02g51610.2 |
| DG <sub>HP</sub> | Os012754_01 | S2 | 0.000  | 0.823  | P | 240.610  | P | 176.230  | P | 99.651   | LOC_Os03g45400.1 |
| DG <sub>HP</sub> | Os012762_01 | S2 | 0.753  | 0.000  | P | 118.107  | P | 199.107  | P | 228.675  | LOC_Os09g39230.1 |
| DG <sub>HP</sub> | Os012771_01 | S2 | -1.747 | -0.967 | P | 4711.251 | P | 1403.899 | P | 2743.734 | LOC_Os05g46220.1 |
| DG <sub>HP</sub> | Os012800_01 | S2 | 0.000  | 0.828  | P | 237.893  | P | 229.102  | P | 129.080  | LOC_Os02g10190.1 |
| DG <sub>HP</sub> | Os013058_01 | S2 | -0.799 | 0.000  | P | 379.223  | P | 217.885  | P | 125.085  | LOC_Os04g05010.1 |
| DG <sub>HP</sub> | Os013141_01 | S2 | 0.862  | 0.000  | P | 146.927  | P | 267.062  | P | 291.692  | LOC_Os06g26340.1 |
| DG <sub>HP</sub> | Os013149_01 | S2 | 0.000  | 0.993  | P | 148.530  | P | 176.376  | P | 88.646   | LOC_Os07g48300.1 |
| DG <sub>HP</sub> | Os013169_01 | S2 | -0.933 | 0.000  | P | 6253.796 | P | 3274.436 | P | 3416.094 | LOC_Os04g36720.1 |
| DG <sub>HP</sub> | Os013183_01 | S2 | 0.782  | 0.000  | P | 108.804  | P | 187.040  | P | 187.936  | LOC_Os02g34470.3 |
| DG <sub>HP</sub> | Os013225_01 | S2 | -0.920 | 0.000  | P | 1303.491 | P | 689.037  | P | 631.158  | LOC_Os06g12110.1 |

|                  |             |    |        |        |   |           |   |          |   |          |                  |
|------------------|-------------|----|--------|--------|---|-----------|---|----------|---|----------|------------------|
| DG <sub>HP</sub> | Os013285_01 | S2 | -1.045 | 0.000  | P | 546.769   | P | 264.909  | P | 185.422  | LOC_Os04g46740.1 |
| DG <sub>HP</sub> | Os013356_01 | S2 | 1.962  | 0.000  | P | 240.144   | P | 935.682  | P | 1157.535 | LOC_Os07g40974.1 |
| DG <sub>HP</sub> | Os013394_01 | S2 | 0.000  | -0.766 | P | 436.572   | P | 385.952  | P | 656.310  | LOC_Os01g13540.1 |
| DG <sub>HP</sub> | Os013447_01 | S2 | -0.929 | 0.000  | P | 321.951   | P | 169.130  | P | 122.831  | LOC_Os02g34600.1 |
| DG <sub>HP</sub> | Os013502_01 | S2 | 0.000  | 0.865  | P | 266.082   | P | 346.335  | P | 190.166  | LOC_Os04g22900.3 |
| DG <sub>HP</sub> | Os013530_01 | S2 | 0.000  | 0.835  | P | 447.555   | P | 420.287  | P | 235.549  | LOC_Os08g30060.2 |
| DG <sub>HP</sub> | Os013541_01 | S2 | 2.081  | 0.000  | P | 134.176   | P | 567.656  | P | 705.633  | LOC_Os10g22510.1 |
| DG <sub>HP</sub> | Os013670_01 | S2 | -0.957 | 10.000 | P | 297.279   | P | 153.085  | A | 69.694   | LOC_Os07g42770.1 |
| DG <sub>HP</sub> | Os013978_01 | S2 | 0.774  | 0.000  | P | 140.435   | P | 240.076  | P | 240.521  | LOC_Os12g13460.1 |
| DG <sub>HP</sub> | Os014092_01 | S2 | 0.771  | 0.000  | P | 159.269   | P | 271.700  | P | 252.689  | LOC_Os11g08300.1 |
| DG <sub>HP</sub> | Os014164_01 | S2 | 1.635  | 0.000  | P | 148.740   | P | 462.044  | P | 468.524  | LOC_Os04g57700.2 |
| DG <sub>HP</sub> | Os014195_01 | S2 | -0.881 | 0.000  | P | 354.018   | P | 192.287  | P | 137.672  | -                |
| DG <sub>HP</sub> | Os014257_01 | S2 | 0.847  | 0.000  | P | 105.586   | P | 189.930  | P | 153.031  | LOC_Os09g19820.1 |
| DG <sub>HP</sub> | Os014284_01 | S2 | 0.000  | 0.826  | P | 299.003   | P | 353.541  | P | 199.452  | LOC_Os05g33820.1 |
| DG <sub>HP</sub> | Os014307_01 | S2 | 0.000  | 0.933  | P | 809.647   | P | 499.643  | P | 261.652  | LOC_Os07g32630.1 |
| DG <sub>HP</sub> | Os014335_01 | S2 | 0.781  | 0.000  | P | 111.152   | P | 190.997  | P | 176.163  | LOC_Os02g31150.1 |
| DG <sub>HP</sub> | Os014364_01 | S2 | 1.023  | 1.503  | P | 636.832   | P | 1294.243 | P | 456.492  | LOC_Os01g45914.1 |
| DG <sub>HP</sub> | Os014409_01 | S2 | 0.000  | -0.816 | P | 2305.349  | P | 2474.252 | P | 4355.149 | LOC_Os08g35939.1 |
| DG <sub>HP</sub> | Os014456_01 | S2 | 0.874  | 0.000  | P | 106.697   | P | 195.493  | P | 187.563  | LOC_Os01g64650.3 |
| DG <sub>HP</sub> | Os014603_01 | S2 | -1.119 | 0.000  | P | 786.333   | P | 362.003  | P | 237.318  | LOC_Os01g55870.1 |
| DG <sub>HP</sub> | Os014877_01 | S2 | 0.000  | -0.662 | P | 304.901   | P | 192.492  | P | 304.621  | LOC_Os05g02750.1 |
| DG <sub>HP</sub> | Os015010_01 | S2 | -0.879 | 0.000  | P | 306.792   | P | 166.873  | P | 149.279  | LOC_Os11g43950.1 |
| DG <sub>HP</sub> | Os015041_01 | S2 | -0.895 | 0.000  | P | 525.851   | P | 282.834  | P | 371.377  | LOC_Os01g51360.1 |
| DG <sub>HP</sub> | Os015095_01 | S2 | 1.508  | 0.000  | P | 182.352   | P | 518.699  | P | 450.245  | LOC_Os01g73450.1 |
| DG <sub>HP</sub> | Os015144_01 | S2 | -2.107 | 0.000  | P | 12387.772 | P | 2874.631 | P | 2017.614 | LOC_Os03g26650.2 |
| DG <sub>HP</sub> | Os015150_01 | S2 | 0.000  | 0.857  | P | 3691.982  | P | 3341.447 | P | 1844.862 | LOC_Os06g41010.4 |
| DG <sub>HP</sub> | Os015656_01 | S2 | 1.063  | 0.000  | P | 304.908   | P | 636.986  | P | 915.257  | LOC_Os07g41280.3 |
| DG <sub>HP</sub> | Os015718_01 | S2 | -1.135 | 0.000  | P | 399.363   | P | 181.877  | P | 143.953  | LOC_Os11g05740.1 |
| DG <sub>HP</sub> | Os015750_01 | S2 | 2.726  | 0.000  | P | 88.004    | P | 582.127  | P | 669.256  | LOC_Os10g42870.1 |
| DG <sub>HP</sub> | Os015828_01 | S2 | 0.723  | 0.000  | P | 219.842   | P | 362.786  | P | 386.601  | LOC_Os10g21110.1 |
| DG <sub>HP</sub> | Os015914_01 | S2 | 0.000  | -0.746 | P | 402.027   | P | 283.467  | P | 475.373  | -                |

|                  |             |    |        |        |   |           |   |          |   |          |                  |
|------------------|-------------|----|--------|--------|---|-----------|---|----------|---|----------|------------------|
| DG <sub>HP</sub> | Os016132_01 | S2 | 1.268  | -0.823 | P | 176.172   | P | 424.215  | P | 750.238  | LOC_Os04g14190.1 |
| DG <sub>HP</sub> | Os016309_01 | S2 | 0.869  | 0.000  | P | 710.810   | P | 1297.788 | P | 1626.077 | LOC_Os10g28360.1 |
| DG <sub>HP</sub> | Os016311_01 | S2 | 0.000  | -0.661 | P | 322.849   | P | 304.225  | P | 480.880  | LOC_Os03g48480.1 |
| DG <sub>HP</sub> | Os016336_01 | S2 | -1.216 | 0.000  | P | 289.355   | P | 124.566  | P | 129.195  | LOC_Os06g05424.1 |
| DG <sub>HP</sub> | Os016394_01 | S2 | 0.000  | 0.856  | P | 1133.543  | P | 919.106  | P | 507.789  | LOC_Os04g42900.1 |
| DG <sub>HP</sub> | Os016404_01 | S2 | -1.147 | 0.000  | P | 478.856   | P | 216.222  | P | 213.916  | LOC_Os01g15610.1 |
| DG <sub>HP</sub> | Os016453_01 | S2 | -1.101 | 0.000  | P | 340.185   | P | 158.644  | P | 138.843  | LOC_Os06g36210.1 |
| DG <sub>HP</sub> | Os016457_01 | S2 | -1.176 | 0.000  | P | 646.029   | P | 285.977  | P | 424.054  | -                |
| DG <sub>HP</sub> | Os016458_01 | S2 | -0.804 | 0.000  | P | 1129.025  | P | 646.585  | P | 912.068  | LOC_Os01g22010.3 |
| DG <sub>HP</sub> | Os016689_01 | S2 | -0.928 | 10.000 | P | 311.379   | P | 163.638  | A | 92.485   | LOC_Os08g01514.1 |
| DG <sub>HP</sub> | Os016716_01 | S2 | 1.214  | 0.000  | P | 1752.902  | P | 4067.410 | P | 3360.205 | LOC_Os02g10120.1 |
| DG <sub>HP</sub> | Os016831_01 | S2 | -0.829 | 0.000  | P | 252.768   | P | 142.322  | P | 175.879  | LOC_Os03g04570.1 |
| DG <sub>HP</sub> | Os016841_01 | S2 | -0.985 | 0.000  | P | 946.330   | P | 478.009  | P | 283.504  | LOC_Os07g33650.3 |
| DG <sub>HP</sub> | Os016919_01 | S2 | -1.021 | 0.000  | P | 1036.730  | P | 510.725  | P | 438.519  | LOC_Os02g01590.1 |
| DG <sub>HP</sub> | Os016953_01 | S2 | 0.000  | 0.838  | P | 710.021   | P | 554.596  | P | 310.244  | LOC_Os05g35710.2 |
| DG <sub>HP</sub> | Os017246_01 | S2 | 0.000  | 0.910  | P | 418.591   | P | 416.016  | P | 221.446  | LOC_Os12g02980.1 |
| DG <sub>HP</sub> | Os017298_01 | S2 | 0.000  | 0.857  | P | 439.135   | P | 359.386  | P | 198.370  | -                |
| DG <sub>HP</sub> | Os017352_01 | S2 | -0.838 | 0.000  | P | 797.376   | P | 446.103  | P | 529.481  | -                |
| DG <sub>HP</sub> | Os017372_01 | S2 | -1.067 | 1.335  | P | 1425.861  | P | 680.567  | P | 269.731  | LOC_Os11g45720.1 |
| DG <sub>HP</sub> | Os017433_01 | S2 | -2.615 | 3.389  | P | 18899.282 | P | 3084.458 | P | 294.415  | LOC_Os02g51570.1 |
| DG <sub>HP</sub> | Os017442_01 | S2 | 0.000  | -0.661 | P | 4519.751  | P | 3339.934 | P | 5279.499 | LOC_Os02g20860.1 |
| DG <sub>HP</sub> | Os017490_01 | S2 | -0.913 | 0.000  | P | 379.589   | P | 201.607  | P | 183.002  | LOC_Os05g48050.1 |
| DG <sub>HP</sub> | Os017555_01 | S2 | 0.000  | -0.814 | P | 288.791   | P | 313.272  | P | 550.652  | LOC_Os03g53860.1 |
| DG <sub>HP</sub> | Os017568_01 | S2 | 0.000  | 1.139  | P | 395.621   | P | 290.265  | P | 131.761  | LOC_Os03g43590.1 |
| DG <sub>HP</sub> | Os017668_01 | S2 | 0.000  | 0.976  | P | 265.711   | P | 236.095  | P | 120.005  | LOC_Os05g47442.1 |
| DG <sub>HP</sub> | Os017704_01 | S2 | -1.506 | 0.943  | P | 659.308   | P | 232.111  | P | 120.732  | LOC_Os02g07200.3 |
| DG <sub>HP</sub> | Os017780_01 | S2 | 0.000  | 1.019  | P | 435.289   | P | 430.373  | P | 212.422  | LOC_Os05g51180.1 |
| DG <sub>HP</sub> | Os017796_01 | S2 | 0.742  | 0.000  | P | 795.824   | P | 1330.926 | P | 883.334  | LOC_Os03g29540.2 |
| DG <sub>HP</sub> | Os017896_01 | S2 | 0.000  | 0.868  | P | 852.026   | P | 669.137  | P | 366.610  | LOC_Os01g52470.1 |
| DG <sub>HP</sub> | Os018131_01 | S2 | 0.000  | 0.845  | P | 297.812   | P | 255.163  | P | 142.033  | LOC_Os12g42140.1 |
| DG <sub>HP</sub> | Os018221_01 | S2 | 0.000  | -1.649 | P | 930.686   | P | 814.782  | P | 2554.555 | -                |

|                  |             |    |        |        |   |           |   |           |   |           |                  |
|------------------|-------------|----|--------|--------|---|-----------|---|-----------|---|-----------|------------------|
| DG <sub>HP</sub> | Os018264_01 | S2 | -2.399 | 0.000  | P | 2501.313  | P | 474.389   | P | 378.456   | LOC_Os08g41320.1 |
| DG <sub>HP</sub> | Os018414_01 | S2 | 0.000  | 1.272  | P | 3151.130  | P | 2484.985  | P | 1029.023  | LOC_Os07g28910.1 |
| DG <sub>HP</sub> | Os018473_01 | S2 | 0.000  | 0.924  | P | 182.749   | P | 198.911   | P | 104.818   | LOC_Os01g25820.1 |
| DG <sub>HP</sub> | Os018564_01 | S2 | 0.737  | 0.000  | P | 96.725    | P | 161.175   | P | 150.381   | LOC_Os12g12990.1 |
| DG <sub>HP</sub> | Os018691_01 | S2 | 0.000  | -0.627 | P | 228.641   | P | 210.238   | P | 324.594   | LOC_Os03g08430.1 |
| DG <sub>HP</sub> | Os018744_01 | S2 | -0.981 | 0.000  | P | 720.796   | P | 365.089   | P | 490.039   | LOC_Os08g39630.1 |
| DG <sub>HP</sub> | Os018786_01 | S2 | -0.855 | 0.000  | P | 2689.121  | P | 1486.975  | P | 1298.931  | LOC_Os03g16670.1 |
| DG <sub>HP</sub> | Os018915_01 | S2 | -0.821 | 0.000  | P | 2511.127  | P | 1421.468  | P | 1637.018  | LOC_Os04g43760.1 |
| DG <sub>HP</sub> | Os019000_01 | S2 | 0.000  | 0.987  | P | 301.864   | P | 225.901   | P | 113.976   | LOC_Os08g02250.1 |
| DG <sub>HP</sub> | Os019004_01 | S2 | 0.000  | 0.877  | P | 326.933   | P | 255.803   | P | 139.281   | LOC_Os10g37340.1 |
| DG <sub>HP</sub> | Os019019_01 | S2 | 0.000  | -0.819 | P | 17841.449 | P | 17551.304 | P | 30956.881 | LOC_Os06g07830.1 |
| DG <sub>HP</sub> | Os019163_01 | S2 | -0.811 | 0.000  | P | 1920.132  | P | 1094.379  | P | 680.024   | LOC_Os01g08560.2 |
| DG <sub>HP</sub> | Os019169_01 | S2 | 0.000  | 0.912  | P | 1511.350  | P | 1065.184  | P | 566.020   | LOC_Os10g02630.1 |
| DG <sub>HP</sub> | Os019393_01 | S2 | 0.000  | -0.646 | P | 188.750   | P | 161.715   | P | 253.058   | LOC_Os09g08990.1 |
| DG <sub>HP</sub> | Os019634_01 | S2 | 0.000  | 0.970  | P | 961.638   | P | 902.915   | P | 461.058   | LOC_Os06g02380.2 |
| DG <sub>HP</sub> | Os019649_01 | S2 | 0.766  | 0.000  | P | 131.460   | P | 223.521   | P | 208.432   | LOC_Os05g26820.1 |
| DG <sub>HP</sub> | Os019869_01 | S2 | 0.000  | 0.913  | P | 3050.250  | P | 2076.842  | P | 1103.340  | LOC_Os01g61460.1 |
| DG <sub>HP</sub> | Os019947_01 | S2 | -0.990 | 1.076  | P | 382.073   | P | 192.382   | P | 91.256    | LOC_Os11g12050.2 |
| DG <sub>HP</sub> | Os020130_01 | S2 | 0.000  | 0.852  | P | 171.685   | P | 263.169   | P | 145.755   | LOC_Os05g31670.1 |
| DG <sub>HP</sub> | Os020208_01 | S2 | 0.000  | 0.961  | P | 244.063   | P | 176.379   | P | 90.619    | LOC_Os05g11730.1 |
| DG <sub>HP</sub> | Os020291_01 | S2 | -1.093 | 0.000  | P | 1715.420  | P | 804.275   | P | 702.917   | LOC_Os09g24640.1 |
| DG <sub>HP</sub> | Os020350_01 | S2 | 0.786  | 10.000 | P | 90.606    | P | 156.256   | A | 96.917    | LOC_Os10g27230.3 |
| DG <sub>HP</sub> | Os020363_01 | S2 | -1.181 | 0.840  | P | 568.489   | P | 250.688   | P | 140.027   | LOC_Os02g21260.1 |
| DG <sub>HP</sub> | Os020435_01 | S2 | 0.910  | 0.000  | P | 93.076    | P | 174.890   | P | 174.086   | LOC_Os01g54560.1 |
| DG <sub>HP</sub> | Os020697_01 | S2 | 0.000  | 0.828  | P | 392.638   | P | 451.119   | P | 254.171   | LOC_Os08g13690.1 |
| DG <sub>HP</sub> | Os020706_01 | S2 | 0.000  | 1.028  | P | 357.544   | P | 226.507   | P | 111.097   | LOC_Os02g18660.1 |
| DG <sub>HP</sub> | Os020710_01 | S2 | 0.000  | 0.839  | P | 163.745   | P | 201.392   | P | 112.548   | LOC_Os10g36950.1 |
| DG <sub>HP</sub> | Os020739_01 | S2 | 0.837  | 0.000  | P | 109.419   | P | 195.421   | P | 132.385   | LOC_Os09g03090.1 |
| DG <sub>HP</sub> | Os020759_01 | S2 | 0.000  | 0.827  | P | 153.318   | P | 174.481   | P | 98.331    | LOC_Os02g30180.1 |
| DG <sub>HP</sub> | Os020946_01 | S2 | 0.000  | 1.201  | P | 386.400   | P | 258.414   | P | 112.409   | LOC_Os11g09180.2 |
| DG <sub>HP</sub> | Os021187_01 | S2 | 0.000  | -0.920 | P | 976.065   | P | 1491.443  | P | 2822.543  | LOC_Os03g49260.1 |

|                  |             |    |        |        |   |           |   |          |   |           |                  |
|------------------|-------------|----|--------|--------|---|-----------|---|----------|---|-----------|------------------|
| DG <sub>HP</sub> | Os021454_01 | S2 | 0.000  | 0.834  | P | 1074.371  | P | 942.351  | P | 528.685   | LOC_Os03g37970.1 |
| DG <sub>HP</sub> | Os021532_01 | S2 | 0.000  | 0.924  | P | 312.489   | P | 270.396  | P | 142.478   | LOC_Os11g34230.1 |
| DG <sub>HP</sub> | Os021588_01 | S2 | 0.000  | -0.635 | P | 6015.465  | P | 6461.959 | P | 10037.380 | -                |
| DG <sub>HP</sub> | Os021635_01 | S2 | -0.804 | 0.000  | P | 444.202   | P | 254.389  | P | 383.511   | LOC_Os02g09510.1 |
| DG <sub>HP</sub> | Os021803_01 | S2 | 0.754  | 0.000  | P | 109.915   | P | 185.370  | P | 138.658   | LOC_Os03g10469.1 |
| DG <sub>HP</sub> | Os021807_01 | S2 | 0.000  | 0.868  | P | 1240.564  | P | 1111.006 | P | 608.745   | -                |
| DG <sub>HP</sub> | Os021870_01 | S2 | 1.578  | 0.000  | P | 279.100   | P | 833.458  | P | 979.585   | LOC_Os07g41060.1 |
| DG <sub>HP</sub> | Os021893_01 | S2 | -0.890 | 0.000  | P | 399.758   | P | 215.746  | P | 314.282   | LOC_Os09g35030.1 |
| DG <sub>HP</sub> | Os021895_01 | S2 | -1.739 | -1.610 | P | 1324.997  | P | 396.955  | P | 1211.472  | LOC_Os08g28180.2 |
| DG <sub>HP</sub> | Os022130_01 | S2 | 0.000  | -0.963 | P | 647.637   | P | 500.649  | P | 975.740   | LOC_Os05g12640.3 |
| DG <sub>HP</sub> | Os022144_01 | S2 | 10.000 | -0.623 | A | 72.621    | P | 241.352  | P | 371.671   | LOC_Os01g35789.1 |
| DG <sub>HP</sub> | Os022407_01 | S2 | 0.000  | -0.679 | P | 146.769   | P | 158.239  | P | 253.286   | LOC_Os01g12440.1 |
| DG <sub>HP</sub> | Os022446_01 | S2 | -0.804 | 10.000 | P | 209.917   | P | 120.258  | A | 92.683    | -                |
| DG <sub>HP</sub> | Os022480_01 | S2 | 0.000  | -0.712 | P | 204.623   | P | 200.692  | P | 328.717   | LOC_Os01g18220.1 |
| DG <sub>HP</sub> | Os022563_01 | S2 | 0.986  | 0.913  | P | 470.499   | P | 931.839  | P | 494.769   | LOC_Os06g04290.1 |
| DG <sub>HP</sub> | Os022572_01 | S2 | -1.366 | 0.000  | P | 16526.923 | P | 6412.331 | P | 7595.876  | LOC_Os12g36980.1 |
| DG <sub>HP</sub> | Os023065_01 | S2 | 0.000  | -0.629 | P | 1562.875  | P | 1448.392 | P | 2240.238  | LOC_Os01g20120.1 |
| DG <sub>HP</sub> | Os023487_01 | S2 | 0.000  | 1.183  | P | 304.374   | P | 288.438  | P | 127.008   | LOC_Os03g25490.1 |
| DG <sub>HP</sub> | Os023496_01 | S2 | 0.000  | -0.685 | P | 229.760   | P | 229.645  | P | 369.303   | LOC_Os01g70000.1 |
| DG <sub>HP</sub> | Os023589_01 | S2 | 1.027  | 0.000  | P | 115.375   | P | 235.094  | P | 222.955   | LOC_Os05g05650.1 |
| DG <sub>HP</sub> | Os023590_01 | S2 | 0.917  | 10.000 | P | 107.842   | P | 203.691  | A | 194.131   | -                |
| DG <sub>HP</sub> | Os023616_01 | S2 | 0.000  | 1.105  | P | 404.420   | P | 296.069  | P | 137.681   | LOC_Os06g46740.1 |
| DG <sub>HP</sub> | Os023652_01 | S2 | 0.000  | 0.871  | P | 422.626   | P | 245.649  | P | 134.311   | LOC_Os04g52750.1 |
| DG <sub>HP</sub> | Os023778_01 | S2 | -0.889 | 0.000  | P | 807.830   | P | 436.188  | P | 389.008   | LOC_Os01g63010.1 |
| DG <sub>HP</sub> | Os023830_01 | S2 | 0.000  | 0.827  | P | 1067.107  | P | 778.852  | P | 438.974   | LOC_Os02g40800.1 |
| DG <sub>HP</sub> | Os023842_01 | S2 | -0.932 | 0.000  | P | 257.490   | P | 134.998  | P | 129.897   | LOC_Os04g53300.1 |
| DG <sub>HP</sub> | Os023918_01 | S2 | -0.864 | 0.000  | P | 652.126   | P | 358.304  | P | 216.143   | LOC_Os05g12670.1 |
| DG <sub>HP</sub> | Os023933_01 | S2 | -1.306 | -0.811 | P | 2242.034  | P | 906.655  | P | 1590.404  | LOC_Os04g33670.1 |
| DG <sub>HP</sub> | Os023998_01 | S2 | 0.000  | -0.654 | P | 389.437   | P | 345.370  | P | 543.534   | LOC_Os08g42570.1 |
| DG <sub>HP</sub> | Os024007_01 | S2 | 0.000  | -0.624 | P | 464.860   | P | 359.060  | P | 553.245   | LOC_Os01g29330.1 |
| DG <sub>HP</sub> | Os024029_01 | S2 | -0.880 | 0.000  | P | 438.965   | P | 238.552  | P | 195.012   | LOC_Os04g46440.1 |

|                  |             |    |        |        |   |           |   |           |   |           |                  |
|------------------|-------------|----|--------|--------|---|-----------|---|-----------|---|-----------|------------------|
| DG <sub>HP</sub> | Os024059_01 | S2 | -1.122 | 0.000  | P | 704.011   | P | 323.553   | P | 383.863   | -                |
| DG <sub>HP</sub> | Os024063_01 | S2 | 0.876  | 0.000  | P | 225.100   | P | 412.984   | P | 396.175   | LOC_Os12g38230.1 |
| DG <sub>HP</sub> | Os024093_01 | S2 | 0.000  | -0.645 | P | 21136.048 | P | 23751.176 | P | 37140.578 | LOC_Os03g22820.1 |
| DG <sub>HP</sub> | Os024178_01 | S2 | 0.000  | 0.826  | P | 294.290   | P | 244.247   | P | 137.788   | LOC_Os12g44320.1 |
| DG <sub>HP</sub> | Os024207_01 | S2 | 0.000  | -0.732 | P | 393.003   | P | 342.538   | P | 568.796   | -                |
| DG <sub>HP</sub> | Os024274_01 | S2 | 2.069  | -0.674 | P | 309.280   | P | 1298.038  | P | 2070.646  | LOC_Os08g07100.1 |
| DG <sub>HP</sub> | Os024276_01 | S2 | 1.817  | 0.000  | P | 1572.331  | P | 5541.021  | P | 3478.361  | -                |
| DG <sub>HP</sub> | Os024326_01 | S2 | -1.324 | 10.000 | P | 350.267   | P | 139.868   | A | 105.234   | LOC_Os07g01410.1 |
| DG <sub>HP</sub> | Os024393_01 | S2 | 0.000  | 1.164  | P | 812.917   | P | 566.814   | P | 252.925   | LOC_Os01g14960.1 |
| DG <sub>HP</sub> | Os024625_01 | S2 | 0.000  | 0.830  | P | 167.678   | P | 167.741   | P | 94.374    | LOC_Os08g25080.1 |
| DG <sub>HP</sub> | Os024723_01 | S2 | 0.000  | 0.859  | P | 1498.227  | P | 923.793   | P | 509.186   | LOC_Os11g05490.1 |
| DG <sub>HP</sub> | Os024764_01 | S2 | 0.907  | 0.000  | P | 558.547   | P | 1047.367  | P | 1077.271  | LOC_Os07g46950.4 |
| DG <sub>HP</sub> | Os024982_01 | S2 | 0.000  | 0.972  | P | 2184.603  | P | 1292.585  | P | 658.935   | LOC_Os08g05480.1 |
| DG <sub>HP</sub> | Os025100_01 | S2 | 0.000  | -1.033 | P | 1138.088  | P | 1093.364  | P | 2237.671  | LOC_Os07g09480.1 |
| DG <sub>HP</sub> | Os025108_01 | S2 | 0.000  | 0.943  | P | 161.819   | P | 199.363   | P | 103.722   | LOC_Os11g24790.1 |
| DG <sub>HP</sub> | Os025872_01 | S2 | -0.941 | 0.000  | P | 1549.205  | P | 806.984   | P | 960.440   | LOC_Os11g01450.1 |
| DG <sub>HP</sub> | Os025875_01 | S2 | 0.762  | 10.000 | P | 100.360   | P | 170.241   | A | 69.508    | LOC_Os03g10070.1 |
| DG <sub>HP</sub> | Os025882_01 | S2 | -0.949 | 0.000  | P | 606.083   | P | 313.837   | P | 304.425   | LOC_Os01g20830.1 |
| DG <sub>HP</sub> | Os025974_01 | S2 | -1.378 | 0.000  | P | 1127.359  | P | 433.648   | P | 449.556   | LOC_Os03g53060.1 |
| DG <sub>HP</sub> | Os026160_01 | S2 | -0.966 | 0.000  | P | 579.118   | P | 296.430   | P | 241.256   | LOC_Os01g14650.1 |
| DG <sub>HP</sub> | Os026161_01 | S2 | 0.000  | -0.672 | P | 367.508   | P | 308.293   | P | 491.277   | LOC_Os02g42470.1 |
| DG <sub>HP</sub> | Os026172_01 | S2 | 0.000  | -0.843 | P | 614.065   | P | 732.591   | P | 1314.373  | LOC_Os03g19170.1 |
| DG <sub>HP</sub> | Os026390_01 | S2 | 0.902  | 0.000  | P | 309.343   | P | 578.039   | P | 676.560   | LOC_Os05g25040.2 |
| DG <sub>HP</sub> | Os026739_01 | S2 | 0.000  | -1.086 | P | 828.536   | P | 709.001   | P | 1505.034  | LOC_Os08g05910.1 |
| DG <sub>HP</sub> | Os027615_01 | S2 | 0.000  | -0.638 | P | 31719.430 | P | 33014.279 | P | 51385.572 | LOC_Os09g17740.1 |
| DG <sub>HP</sub> | Os027760_01 | S2 | 0.000  | -0.828 | P | 332.083   | P | 331.628   | P | 588.735   | LOC_Os12g39880.1 |
| DG <sub>HP</sub> | Os027934_01 | S2 | 0.864  | -0.675 | P | 131.838   | P | 239.972   | P | 383.099   | LOC_Os06g06270.1 |
| DG <sub>HP</sub> | Os027938_01 | S2 | 0.000  | 1.066  | P | 283.566   | P | 329.382   | P | 157.364   | -                |
| DG <sub>HP</sub> | Os028157_01 | S2 | -0.992 | 0.980  | P | 1172.796  | P | 589.610   | P | 299.020   | LOC_Os10g32110.1 |
| DG <sub>HP</sub> | Os028334_01 | S2 | 0.934  | 0.000  | P | 682.865   | P | 1304.880  | P | 950.236   | LOC_Os02g53290.1 |
| DG <sub>HP</sub> | Os028486_01 | S2 | 0.000  | -0.671 | P | 386.163   | P | 333.755   | P | 531.410   | LOC_Os07g40340.1 |

|                  |             |    |        |        |   |          |   |          |   |          |                  |
|------------------|-------------|----|--------|--------|---|----------|---|----------|---|----------|------------------|
| DG <sub>HP</sub> | Os028565_01 | S2 | 0.000  | 0.973  | P | 376.192  | P | 543.647  | P | 276.887  | LOC_Os11g05210.1 |
| DG <sub>HP</sub> | Os028605_01 | S2 | -0.797 | 0.000  | P | 1261.185 | P | 725.644  | P | 903.142  | LOC_Os02g06380.1 |
| DG <sub>HP</sub> | Os028680_01 | S2 | 2.504  | -0.689 | P | 179.856  | P | 1020.396 | P | 1645.210 | LOC_Os07g06100.1 |
| DG <sub>HP</sub> | Os028705_01 | S2 | 0.943  | 0.000  | P | 237.199  | P | 455.974  | P | 502.982  | LOC_Os05g09400.1 |
| DG <sub>HP</sub> | Os028781_01 | S2 | 0.000  | -1.011 | P | 289.740  | P | 181.360  | P | 365.484  | LOC_Os11g12810.1 |
| DG <sub>HP</sub> | Os028782_01 | S2 | 0.000  | -0.908 | P | 312.915  | P | 361.409  | P | 678.065  | LOC_Os11g12810.1 |
| DG <sub>HP</sub> | Os028807_01 | S2 | 0.000  | 1.453  | P | 774.496  | P | 494.815  | P | 180.762  | -                |
| DG <sub>HP</sub> | Os028942_01 | S2 | -1.279 | 0.000  | P | 1254.519 | P | 517.032  | P | 658.077  | LOC_Os05g26860.1 |
| DG <sub>HP</sub> | Os029109_01 | S2 | 0.000  | 1.298  | P | 469.463  | P | 356.053  | P | 144.844  | LOC_Os12g01720.1 |
| DG <sub>HP</sub> | Os029140_01 | S2 | 0.000  | -1.084 | P | 783.868  | P | 862.923  | P | 1829.168 | LOC_Os08g01520.1 |
| DG <sub>HP</sub> | Os029143_01 | S2 | 0.000  | -0.708 | P | 6657.768 | P | 4724.925 | P | 7719.640 | LOC_Os06g43000.1 |
| DG <sub>HP</sub> | Os029535_01 | S2 | -1.074 | 0.000  | P | 8021.476 | P | 3809.392 | P | 4874.493 | LOC_Os06g19770.1 |
| DG <sub>HP</sub> | Os029823_01 | S2 | 0.000  | 0.874  | P | 813.852  | P | 568.425  | P | 310.121  | -                |
| DG <sub>HP</sub> | Os029975_01 | S2 | 1.024  | 0.000  | P | 115.603  | P | 235.129  | P | 244.721  | -                |
| DG <sub>HP</sub> | Os029980_01 | S2 | 1.570  | 0.000  | P | 114.013  | P | 338.419  | P | 487.713  | LOC_Os02g42450.1 |
| DG <sub>HP</sub> | Os030024_01 | S2 | 0.000  | -0.912 | P | 522.622  | P | 626.676  | P | 1178.888 | LOC_Os05g49310.1 |
| DG <sub>HP</sub> | Os030028_01 | S2 | 1.184  | 0.000  | P | 152.021  | P | 345.380  | P | 267.708  | LOC_Os01g02710.1 |
| DG <sub>HP</sub> | Os030162_01 | S2 | 0.000  | 0.941  | P | 1145.618 | P | 770.736  | P | 401.354  | LOC_Os04g51760.1 |
| DG <sub>HP</sub> | Os030167_01 | S2 | 0.745  | 0.000  | P | 614.795  | P | 1030.316 | P | 896.707  | LOC_Os01g18584.1 |
| DG <sub>HP</sub> | Os030344_01 | S2 | 0.000  | 0.843  | P | 858.248  | P | 635.734  | P | 354.488  | LOC_Os12g43820.1 |
| DG <sub>HP</sub> | Os030442_01 | S2 | 1.241  | 0.000  | P | 2015.025 | P | 4762.942 | P | 5046.563 | LOC_Os06g10290.1 |
| DG <sub>HP</sub> | Os030539_01 | S2 | 0.762  | 0.000  | P | 341.252  | P | 578.640  | P | 602.640  | LOC_Os09g32976.1 |
| DG <sub>HP</sub> | Os030543_01 | S2 | 0.000  | -0.681 | P | 4136.239 | P | 5197.734 | P | 8330.665 | LOC_Os09g16240.1 |
| DG <sub>HP</sub> | Os030589_01 | S2 | -0.866 | 0.000  | P | 296.826  | P | 162.844  | P | 101.479  | LOC_Os10g08990.1 |
| DG <sub>HP</sub> | Os030672_01 | S2 | 0.000  | 0.901  | P | 350.264  | P | 248.063  | P | 132.804  | LOC_Os08g40120.1 |
| DG <sub>HP</sub> | Os030681_01 | S2 | 0.000  | -0.656 | P | 238.417  | P | 320.336  | P | 504.701  | LOC_Os07g34390.1 |
| DG <sub>HP</sub> | Os030834_01 | S2 | -0.986 | 0.000  | P | 733.803  | P | 370.465  | P | 514.427  | LOC_Os02g45930.1 |
| DG <sub>HP</sub> | Os030865_01 | S2 | -0.857 | 0.000  | P | 2463.488 | P | 1360.014 | P | 1806.102 | LOC_Os01g16400.1 |
| DG <sub>HP</sub> | Os030882_01 | S2 | 0.763  | -0.681 | P | 243.516  | P | 413.203  | P | 662.403  | LOC_Os02g57810.1 |
| DG <sub>HP</sub> | Os030972_01 | S2 | 0.000  | -0.797 | P | 388.610  | P | 467.561  | P | 812.642  | LOC_Os05g33870.1 |
| DG <sub>HP</sub> | Os031132_01 | S2 | 0.000  | -0.743 | P | 243.308  | P | 280.082  | P | 468.780  | LOC_Os11g36760.1 |

|                  |             |    |        |        |   |          |   |          |   |          |                  |
|------------------|-------------|----|--------|--------|---|----------|---|----------|---|----------|------------------|
| DG <sub>HP</sub> | Os031227_01 | S2 | -0.799 | 0.000  | P | 860.373  | P | 494.507  | P | 500.991  | LOC_Os12g41300.1 |
| DG <sub>HP</sub> | Os031550_01 | S2 | 0.000  | 1.067  | P | 718.266  | P | 919.495  | P | 438.831  | LOC_Os04g10924.1 |
| DG <sub>HP</sub> | Os031701_01 | S2 | 0.852  | 0.000  | P | 184.833  | P | 333.513  | P | 299.640  | LOC_Os01g24690.1 |
| DG <sub>HP</sub> | Os031721_01 | S2 | 0.000  | 0.823  | P | 368.330  | P | 213.677  | P | 120.792  | -                |
| DG <sub>HP</sub> | Os031781_01 | S2 | -0.861 | 0.000  | P | 3050.100 | P | 1679.175 | P | 1279.303 | LOC_Os06g30530.1 |
| DG <sub>HP</sub> | Os031851_01 | S2 | 0.000  | -1.022 | P | 223.705  | P | 203.514  | P | 413.410  | LOC_Os01g47370.1 |
| DG <sub>HP</sub> | Os032055_01 | S2 | 0.000  | -0.993 | P | 1187.343 | P | 1220.573 | P | 2429.585 | LOC_Os06g15750.1 |
| DG <sub>HP</sub> | Os032194_01 | S2 | -0.917 | 0.000  | P | 5833.508 | P | 3088.773 | P | 4065.551 | LOC_Os08g43530.1 |
| DG <sub>HP</sub> | Os032267_01 | S2 | 0.000  | 2.443  | P | 1518.319 | P | 963.203  | P | 177.171  | LOC_Os06g08690.1 |
| DG <sub>HP</sub> | Os032650_01 | S2 | 1.448  | -0.745 | P | 137.566  | P | 375.352  | P | 628.953  | -                |
| DG <sub>HP</sub> | Os032670_01 | S2 | -0.849 | 0.000  | P | 660.721  | P | 366.706  | P | 296.560  | LOC_Os12g30570.1 |
| DG <sub>HP</sub> | Os033227_01 | S2 | -0.922 | -0.623 | P | 276.586  | P | 145.959  | P | 224.793  | LOC_Os05g49450.1 |
| DG <sub>HP</sub> | Os033510_01 | S2 | 0.000  | 0.899  | P | 447.112  | P | 391.237  | P | 209.755  | LOC_Os06g06360.1 |
| DG <sub>HP</sub> | Os033744_01 | S2 | 0.000  | 0.988  | P | 306.712  | P | 280.944  | P | 141.611  | LOC_Os03g05450.1 |
| DG <sub>HP</sub> | Os033886_01 | S2 | 0.832  | 0.000  | P | 624.976  | P | 1112.587 | P | 1009.796 | LOC_Os08g33300.1 |
| DG <sub>HP</sub> | Os033905_01 | S2 | -1.003 | 0.000  | P | 818.982  | P | 408.757  | P | 418.165  | LOC_Os07g09090.1 |
| DG <sub>HP</sub> | Os034112_01 | S2 | -0.881 | 10.000 | P | 452.261  | P | 245.654  | A | 106.131  | LOC_Os02g40130.1 |
| DG <sub>HP</sub> | Os034167_01 | S2 | 0.762  | 0.000  | P | 96.607   | P | 163.871  | P | 155.447  | -                |
| DG <sub>HP</sub> | Os034533_01 | S2 | 0.000  | 0.853  | P | 580.682  | P | 571.801  | P | 316.582  | LOC_Os05g12270.1 |
| DG <sub>HP</sub> | Os034560_01 | S2 | -1.138 | 0.000  | P | 357.784  | P | 162.550  | P | 183.983  | -                |
| DG <sub>HP</sub> | Os034598_01 | S2 | -0.801 | 0.000  | P | 4806.570 | P | 2758.160 | P | 2679.093 | LOC_Os05g23050.1 |
| DG <sub>HP</sub> | Os034700_01 | S2 | 0.000  | -0.628 | P | 222.536  | P | 151.178  | P | 233.582  | LOC_Os06g39040.1 |
| DG <sub>HP</sub> | Os034759_01 | S2 | 0.000  | 0.856  | P | 3425.374 | P | 2279.533 | P | 1259.617 | LOC_Os04g13090.1 |
| DG <sub>HP</sub> | Os035057_01 | S2 | 0.000  | 0.852  | P | 322.493  | P | 267.668  | P | 148.248  | LOC_Os10g31200.1 |
| DG <sub>HP</sub> | Os035088_01 | S2 | 1.304  | 0.000  | P | 934.635  | P | 2307.388 | P | 2484.580 | LOC_Os05g04990.1 |
| DG <sub>HP</sub> | Os035261_01 | S2 | 0.898  | -0.711 | P | 738.266  | P | 1375.278 | P | 2250.561 | LOC_Os06g14324.1 |
| DG <sub>HP</sub> | Os035342_01 | S2 | 0.000  | 0.995  | P | 466.418  | P | 347.369  | P | 174.302  | LOC_Os12g21870.1 |
| DG <sub>HP</sub> | Os035502_01 | S2 | 0.825  | 0.000  | P | 122.702  | P | 217.330  | P | 209.270  | LOC_Os02g42400.1 |
| DG <sub>HP</sub> | Os035651_01 | S2 | -0.921 | -0.683 | P | 381.359  | P | 201.385  | P | 323.405  | LOC_Os05g04760.1 |
| DG <sub>HP</sub> | Os035864_01 | S2 | 0.000  | -0.841 | P | 991.099  | P | 1558.614 | P | 2791.736 | LOC_Os11g35120.1 |
| DG <sub>HP</sub> | Os035877_01 | S2 | 0.000  | 0.919  | P | 508.707  | P | 355.075  | P | 187.753  | -                |



|                  |             |    |        |        |   |          |   |          |   |          |                  |
|------------------|-------------|----|--------|--------|---|----------|---|----------|---|----------|------------------|
| DG <sub>HP</sub> | Os036025_01 | S2 | -1.070 | 0.000  | P | 1196.892 | P | 570.055  | P | 539.796  | LOC_Os09g36180.1 |
| DG <sub>HP</sub> | Os036066_01 | S2 | 0.000  | 0.828  | P | 285.964  | P | 261.446  | P | 147.282  | LOC_Os02g09190.1 |
| DG <sub>HP</sub> | Os036348_01 | S2 | -1.404 | 0.000  | P | 6043.869 | P | 2283.900 | P | 3223.867 | LOC_Os12g14450.1 |
| DG <sub>HP</sub> | Os036380_01 | S2 | 0.000  | -0.691 | P | 190.600  | P | 228.498  | P | 368.946  | LOC_Os09g30120.1 |
| DG <sub>HP</sub> | Os036477_01 | S2 | -1.536 | 10.000 | P | 570.835  | P | 196.830  | A | 76.604   | LOC_Os05g35450.1 |
| DG <sub>HP</sub> | Os036652_01 | S2 | 0.925  | 0.000  | P | 99.828   | P | 189.506  | P | 144.610  | LOC_Os09g06530.1 |
| DG <sub>HP</sub> | Os036733_01 | S2 | 0.745  | 0.000  | P | 201.956  | P | 338.501  | P | 374.698  | LOC_Os08g01660.2 |
| DG <sub>HP</sub> | Os036767_01 | S2 | -0.849 | 0.000  | P | 417.553  | P | 231.838  | P | 306.868  | LOC_Os07g09660.1 |
| DG <sub>HP</sub> | Os036864_01 | S2 | 0.000  | -0.817 | P | 1046.408 | P | 742.605  | P | 1308.673 | LOC_Os01g23750.1 |
| DG <sub>HP</sub> | Os036907_01 | S2 | -1.036 | 0.921  | P | 2409.611 | P | 1174.857 | P | 620.496  | LOC_Os05g48780.1 |
| DG <sub>HP</sub> | Os037041_01 | S2 | 0.000  | 1.651  | P | 678.605  | P | 489.095  | P | 155.784  | -                |
| DG <sub>HP</sub> | Os037049_01 | S2 | -0.878 | -0.709 | P | 1016.752 | P | 553.388  | P | 904.318  | LOC_Os08g17980.1 |
| DG <sub>HP</sub> | Os037202_01 | S2 | -0.899 | 0.000  | P | 1119.193 | P | 600.322  | P | 628.191  | LOC_Os10g38495.1 |
| DG <sub>HP</sub> | Os037509_01 | S2 | 0.785  | 10.000 | P | 155.876  | P | 268.679  | A | 104.006  | LOC_Os05g22600.1 |
| DG <sub>HP</sub> | Os037607_01 | S2 | -0.877 | 0.000  | P | 552.665  | P | 300.822  | P | 338.883  | LOC_Os01g02680.1 |
| DG <sub>HP</sub> | Os037690_01 | S2 | 0.775  | 10.000 | P | 98.024   | P | 167.759  | A | 78.760   | LOC_Os01g19350.1 |
| DG <sub>HP</sub> | Os037792_01 | S2 | -0.928 | 10.000 | P | 315.275  | P | 165.692  | A | 58.692   | LOC_Os07g35860.1 |
| DG <sub>HP</sub> | Os037993_01 | S2 | 0.000  | 0.906  | P | 349.021  | P | 327.921  | P | 175.011  | LOC_Os05g28640.1 |
| DG <sub>HP</sub> | Os038123_01 | S2 | -1.281 | 10.000 | P | 515.129  | P | 211.925  | A | 9.141    | LOC_Os09g09630.1 |
| DG <sub>HP</sub> | Os038136_01 | S2 | 0.841  | 0.000  | P | 274.441  | P | 491.545  | P | 445.410  | LOC_Os08g14990.1 |
| DG <sub>HP</sub> | Os038164_01 | S2 | 0.739  | 0.000  | P | 145.216  | P | 242.341  | P | 344.346  | LOC_Os03g11670.1 |
| DG <sub>HP</sub> | Os038579_01 | S2 | -1.045 | 0.000  | P | 436.708  | P | 211.632  | P | 282.973  | LOC_Os12g40170.1 |
| DG <sub>HP</sub> | Os038695_01 | S2 | 0.797  | 0.000  | P | 493.234  | P | 857.232  | P | 687.939  | -                |
| DG <sub>HP</sub> | Os038937_01 | S2 | 1.009  | 0.000  | P | 246.553  | P | 496.337  | P | 590.718  | LOC_Os06g41680.1 |
| DG <sub>HP</sub> | Os039430_01 | S2 | 1.888  | 0.000  | P | 338.052  | P | 1251.617 | P | 1708.953 | LOC_Os08g07080.1 |
| DG <sub>HP</sub> | Os039580_01 | S2 | 0.000  | 2.316  | P | 1303.830 | P | 764.514  | P | 153.482  | LOC_Os02g40180.1 |
| DG <sub>HP</sub> | Os039593_01 | S2 | -0.837 | 0.000  | P | 1998.154 | P | 1118.561 | P | 866.439  | -                |
| DG <sub>HP</sub> | Os039771_01 | S2 | 0.000  | 1.496  | P | 645.807  | P | 430.401  | P | 152.601  | LOC_Os01g24970.1 |
| DG <sub>HP</sub> | Os039994_01 | S2 | 0.000  | -1.133 | P | 1026.218 | P | 1170.785 | P | 2567.878 | LOC_Os07g04790.1 |
| DG <sub>HP</sub> | Os040062_01 | S2 | 0.000  | 0.905  | P | 351.172  | P | 264.123  | P | 141.023  | -                |
| DG <sub>HP</sub> | Os040088_01 | S2 | 0.000  | -0.759 | P | 217.941  | P | 189.752  | P | 321.178  | -                |

|                  |             |    |        |        |   |          |   |          |   |           |                  |
|------------------|-------------|----|--------|--------|---|----------|---|----------|---|-----------|------------------|
| DG <sub>HP</sub> | Os040110_01 | S2 | -1.021 | 0.000  | P | 551.880  | P | 271.980  | P | 248.625   | LOC_Os04g27840.1 |
| DG <sub>HP</sub> | Os040132_01 | S2 | 0.000  | -0.666 | P | 797.227  | P | 632.073  | P | 1002.622  | LOC_Os08g37030.1 |
| DG <sub>HP</sub> | Os040171_01 | S2 | 0.802  | 0.000  | P | 148.845  | P | 259.570  | P | 259.007   | -                |
| DG <sub>HP</sub> | Os040246_01 | S2 | -0.871 | 0.000  | P | 1657.855 | P | 906.765  | P | 652.181   | LOC_Os08g44670.1 |
| DG <sub>HP</sub> | Os040304_01 | S2 | -0.945 | 1.765  | P | 775.487  | P | 402.743  | P | 118.465   | LOC_Os04g06879.1 |
| DG <sub>HP</sub> | Os040714_01 | S2 | -0.815 | 10.000 | P | 561.669  | P | 319.271  | A | 102.909   | LOC_Os06g33660.1 |
| DG <sub>HP</sub> | Os040841_01 | S2 | 0.000  | 2.006  | P | 2128.903 | P | 1262.819 | P | 314.350   | LOC_Os05g38390.1 |
| DG <sub>HP</sub> | Os041088_01 | S2 | 0.872  | 0.000  | P | 185.406  | P | 339.293  | P | 483.452   | LOC_Os05g17110.1 |
| DG <sub>HP</sub> | Os041269_01 | S2 | 0.970  | 0.000  | P | 130.795  | P | 256.200  | P | 312.917   | LOC_Os10g01500.1 |
| DG <sub>HP</sub> | Os041351_01 | S2 | -0.872 | 0.000  | P | 742.121  | P | 405.618  | P | 325.169   | LOC_Os12g16650.1 |
| DG <sub>HP</sub> | Os041364_01 | S2 | -0.861 | 0.000  | P | 549.751  | P | 302.748  | P | 386.514   | -                |
| DG <sub>HP</sub> | Os041408_01 | S2 | 0.000  | 0.992  | P | 210.406  | P | 201.597  | P | 101.327   | LOC_Os01g41160.1 |
| DG <sub>HP</sub> | Os041424_01 | S2 | -0.809 | 10.000 | P | 261.610  | P | 149.290  | A | 18.419    | LOC_Os08g26820.1 |
| DG <sub>HP</sub> | Os041794_01 | S2 | -0.967 | 0.000  | P | 348.401  | P | 178.230  | P | 118.801   | -                |
| DG <sub>HP</sub> | Os042013_01 | S2 | 0.889  | -1.073 | P | 5017.977 | P | 9292.308 | P | 19546.938 | LOC_Os08g19330.1 |
| DG <sub>HP</sub> | Os042015_01 | S2 | -0.844 | 0.000  | P | 1268.138 | P | 706.296  | P | 924.909   | -                |
| DG <sub>HP</sub> | Os042188_01 | S2 | 0.000  | 1.046  | P | 373.566  | P | 309.913  | P | 150.128   | LOC_Os03g18620.1 |
| DG <sub>HP</sub> | Os042347_01 | S2 | -0.836 | 0.000  | P | 628.167  | P | 351.815  | P | 316.503   | -                |
| DG <sub>HP</sub> | Os042441_01 | S2 | -0.789 | 0.000  | P | 898.765  | P | 520.197  | P | 484.209   | LOC_Os06g13800.1 |
| DG <sub>HP</sub> | Os042950_01 | S2 | 0.989  | 0.873  | P | 116.107  | P | 230.511  | P | 125.895   | -                |
| DG <sub>HP</sub> | Os042951_01 | S2 | 0.809  | 0.000  | P | 376.921  | P | 660.391  | P | 433.044   | -                |
| DG <sub>HP</sub> | Os042994_01 | S2 | 0.886  | 0.000  | P | 172.537  | P | 318.940  | P | 387.412   | LOC_Os05g31090.1 |
| DG <sub>HP</sub> | Os043043_01 | S2 | 0.816  | 0.000  | P | 322.436  | P | 567.758  | P | 593.121   | LOC_Os07g08520.1 |
| DG <sub>HP</sub> | Os043530_01 | S2 | -1.180 | 0.000  | P | 5869.931 | P | 2591.322 | P | 1920.801  | LOC_Os06g06340.1 |
| DG <sub>HP</sub> | Os043595_01 | S2 | 0.000  | 1.080  | P | 226.936  | P | 264.578  | P | 125.187   | LOC_Os02g27330.1 |
| DG <sub>HP</sub> | Os043715_01 | S2 | 0.789  | 0.000  | P | 122.112  | P | 210.951  | P | 275.245   | LOC_Os10g39070.1 |
| DG <sub>HP</sub> | Os043716_01 | S2 | 0.735  | 0.000  | P | 256.806  | P | 427.491  | P | 540.181   | LOC_Os06g36530.1 |
| DG <sub>HP</sub> | Os043773_01 | S2 | -0.990 | 0.000  | P | 1681.989 | P | 847.011  | P | 711.481   | LOC_Os08g09410.1 |
| DG <sub>HP</sub> | Os043814_01 | S2 | -0.829 | 0.000  | P | 966.644  | P | 544.028  | P | 610.219   | LOC_Os02g32180.1 |
| DG <sub>HP</sub> | Os043831_01 | S2 | 0.728  | 0.000  | P | 133.125  | P | 220.430  | P | 308.035   | -                |
| DG <sub>HP</sub> | Os043838_01 | S2 | -0.877 | 0.000  | P | 327.560  | P | 178.335  | P | 131.735   | LOC_Os05g14480.1 |

|                  |             |    |        |        |   |           |   |           |   |           |                  |
|------------------|-------------|----|--------|--------|---|-----------|---|-----------|---|-----------|------------------|
| DG <sub>HP</sub> | Os044218_01 | S2 | 0.000  | -1.086 | P | 271.490   | P | 377.437   | P | 801.337   | LOC_Os01g24050.1 |
| DG <sub>HP</sub> | Os044259_01 | S2 | 0.000  | -0.769 | P | 1429.533  | P | 1305.519  | P | 2224.545  | LOC_Os05g36370.1 |
| DG <sub>HP</sub> | Os044283_01 | S2 | 1.018  | 0.000  | P | 501.701   | P | 1016.255  | P | 1248.025  | -                |
| DG <sub>HP</sub> | Os044300_01 | S2 | 0.000  | 1.009  | P | 10131.427 | P | 6656.818  | P | 3307.853  | LOC_Os05g11320.1 |
| DG <sub>HP</sub> | Os044395_01 | S2 | -0.936 | 1.157  | P | 3154.148  | P | 1648.931  | P | 739.374   | LOC_Os01g32630.1 |
| DG <sub>HP</sub> | Os044491_01 | S2 | 0.000  | 0.827  | P | 254.514   | P | 223.080   | P | 125.748   | LOC_Os12g10350.1 |
| DG <sub>HP</sub> | Os044515_01 | S2 | 0.000  | -0.845 | P | 233.360   | P | 304.548   | P | 546.946   | LOC_Os06g19130.1 |
| DG <sub>HP</sub> | Os044617_01 | S2 | 0.934  | -1.124 | P | 866.934   | P | 1656.689  | P | 3609.704  | -                |
| DG <sub>HP</sub> | Os044729_01 | S2 | 0.000  | 1.236  | P | 615.344   | P | 405.013   | P | 171.997   | LOC_Os05g30200.1 |
| DG <sub>HP</sub> | Os044883_01 | S2 | 0.000  | 0.830  | P | 354.854   | P | 279.012   | P | 156.919   | -                |
| DG <sub>HP</sub> | Os045006_01 | S2 | 0.000  | -0.622 | P | 171.558   | P | 210.757   | P | 324.263   | LOC_Os08g41520.1 |
| DG <sub>HP</sub> | Os045013_01 | S2 | 0.000  | 0.919  | P | 1835.896  | P | 1459.885  | P | 772.293   | LOC_Os08g31720.1 |
| DG <sub>HP</sub> | Os045192_01 | S2 | -1.120 | 0.000  | P | 459.613   | P | 211.476   | P | 216.337   | LOC_Os06g23380.1 |
| DG <sub>HP</sub> | Os045210_01 | S2 | 0.000  | 0.989  | P | 268.561   | P | 235.933   | P | 118.868   | -                |
| DG <sub>HP</sub> | Os045347_01 | S2 | 1.849  | 0.000  | P | 417.781   | P | 1505.154  | P | 1720.585  | LOC_Os06g18120.1 |
| DG <sub>HP</sub> | Os045565_01 | S2 | 4.005  | 0.000  | P | 302.214   | P | 4851.626  | P | 6260.743  | LOC_Os10g09630.1 |
| DG <sub>HP</sub> | Os045632_01 | S2 | 0.000  | 1.018  | P | 3376.181  | P | 2285.187  | P | 1128.400  | LOC_Os07g18070.1 |
| DG <sub>HP</sub> | Os045664_01 | S2 | -0.788 | 0.000  | P | 614.552   | P | 355.909   | P | 272.802   | LOC_Os02g25890.1 |
| DG <sub>HP</sub> | Os046234_01 | S2 | 0.000  | -0.798 | P | 14946.256 | P | 16210.029 | P | 28192.768 | LOC_Os01g74570.1 |
| DG <sub>HP</sub> | Os046281_01 | S2 | -0.964 | 0.000  | P | 482.829   | P | 247.485   | P | 269.392   | LOC_Os10g38640.1 |
| DG <sub>HP</sub> | Os046309_01 | S2 | -0.862 | 0.000  | P | 589.637   | P | 324.436   | P | 288.636   | LOC_Os08g06070.1 |
| DG <sub>HP</sub> | Os047011_01 | S2 | 0.935  | 0.870  | P | 443.845   | P | 848.315   | P | 464.307   | LOC_Os01g37000.1 |
| DG <sub>HP</sub> | Os047396_01 | S2 | 0.752  | 0.000  | P | 176.987   | P | 298.065   | P | 414.653   | LOC_Os05g02350.1 |
| DG <sub>HP</sub> | Os047423_01 | S2 | 0.000  | 0.846  | P | 360.983   | P | 366.592   | P | 203.974   | LOC_Os11g46880.1 |
| DG <sub>HP</sub> | Os047560_01 | S2 | 0.000  | 1.348  | P | 881.225   | P | 652.796   | P | 256.364   | LOC_Os07g12890.1 |
| DG <sub>HP</sub> | Os047670_01 | S2 | 0.000  | -0.943 | P | 688.498   | P | 458.639   | P | 881.774   | LOC_Os10g01800.1 |
| DG <sub>HP</sub> | Os048024_01 | S2 | -0.834 | 0.000  | P | 255.047   | P | 143.122   | P | 200.709   | LOC_Os04g05750.1 |
| DG <sub>HP</sub> | Os048156_01 | S2 | 0.000  | -0.904 | P | 563.252   | P | 344.599   | P | 644.734   | LOC_Os07g03508.1 |
| DG <sub>HP</sub> | Os048275_01 | S2 | 1.170  | 0.000  | P | 136.548   | P | 307.263   | P | 253.427   | LOC_Os07g48190.1 |
| DG <sub>HP</sub> | Os048365_01 | S2 | 0.727  | 0.000  | P | 139.788   | P | 231.364   | P | 193.251   | LOC_Os09g19310.1 |
| DG <sub>HP</sub> | Os048488_01 | S2 | 0.000  | -0.701 | P | 797.895   | P | 624.606   | P | 1015.648  | LOC_Os12g39690.1 |

|                  |             |    |        |        |   |           |   |           |   |           |                  |
|------------------|-------------|----|--------|--------|---|-----------|---|-----------|---|-----------|------------------|
| DG <sub>HP</sub> | Os048713_01 | S2 | 0.000  | 0.899  | P | 3309.079  | P | 2394.151  | P | 1284.036  | LOC_Os11g27090.1 |
| DG <sub>HP</sub> | Os048756_01 | S2 | -1.178 | 1.637  | P | 762.188   | P | 336.768   | P | 108.290   | LOC_Os06g23780.1 |
| DG <sub>HP</sub> | Os048888_01 | S2 | 0.824  | 10.000 | P | 96.242    | P | 170.323   | A | 82.961    | -                |
| DG <sub>HP</sub> | Os049068_01 | S2 | 0.000  | 0.846  | P | 602.806   | P | 443.051   | P | 246.424   | -                |
| DG <sub>HP</sub> | Os049283_01 | S2 | -0.798 | 0.000  | P | 372.941   | P | 214.437   | P | 233.843   | LOC_Os08g38450.1 |
| DG <sub>HP</sub> | Os049284_01 | S2 | 0.000  | -0.778 | P | 149.833   | P | 194.615   | P | 333.681   | LOC_Os01g05310.1 |
| DG <sub>HP</sub> | Os049472_01 | S2 | 0.000  | 0.977  | P | 721.625   | P | 744.318   | P | 378.231   | LOC_Os10g39080.1 |
| DG <sub>HP</sub> | Os049499_01 | S2 | -0.913 | 0.000  | P | 554.984   | P | 294.670   | P | 233.940   | LOC_Os05g27000.1 |
| DG <sub>HP</sub> | Os049664_01 | S2 | 0.793  | 0.000  | P | 150.286   | P | 260.389   | P | 234.376   | LOC_Os08g08490.1 |
| DG <sub>HP</sub> | Os050024_01 | S2 | 0.000  | 0.893  | P | 1019.487  | P | 854.664   | P | 460.247   | LOC_Os01g65950.1 |
| DG <sub>HP</sub> | Os050288_01 | S2 | 0.000  | 0.870  | P | 335.886   | P | 323.225   | P | 176.800   | -                |
| DG <sub>HP</sub> | Os050644_01 | S2 | -0.900 | 0.000  | P | 460.088   | P | 246.557   | P | 212.501   | LOC_Os11g32630.1 |
| DG <sub>HP</sub> | Os050700_01 | S2 | -0.969 | -0.894 | P | 53337.980 | P | 27255.989 | P | 50638.030 | LOC_Os10g21280.1 |
| DG <sub>HP</sub> | Os051476_01 | S2 | 0.000  | -0.925 | P | 5553.676  | P | 5396.166  | P | 10244.057 | LOC_Os08g01370.1 |
| DG <sub>HP</sub> | Os051763_01 | S2 | -0.918 | 0.000  | P | 418.489   | P | 221.438   | P | 220.331   | LOC_Os11g27100.1 |
| DG <sub>HP</sub> | Os051859_01 | S2 | -1.161 | 2.551  | P | 1877.310  | P | 839.796   | P | 143.295   | -                |
| DG <sub>HP</sub> | Os051935_01 | S2 | 0.845  | -0.681 | P | 738.975   | P | 1327.060  | P | 2127.481  | LOC_Os01g15270.1 |
| DG <sub>HP</sub> | Os051947_01 | S2 | 0.000  | 0.823  | P | 551.324   | P | 419.783   | P | 237.327   | LOC_Os05g25850.1 |
| DG <sub>HP</sub> | Os052021_01 | S2 | 0.000  | 0.902  | P | 667.280   | P | 656.704   | P | 351.486   | LOC_Os12g05430.1 |
| DG <sub>HP</sub> | Os052056_01 | S2 | -0.826 | 0.000  | P | 781.728   | P | 441.081   | P | 398.182   | LOC_Os10g42540.1 |
| DG <sub>HP</sub> | Os052072_01 | S2 | -0.966 | 0.000  | P | 636.600   | P | 325.942   | P | 283.226   | LOC_Os12g26290.2 |
| DG <sub>HP</sub> | Os052084_01 | S2 | -1.372 | 0.000  | P | 1061.642  | P | 410.274   | P | 284.808   | LOC_Os11g32650.1 |
| DG <sub>HP</sub> | Os052123_01 | S2 | 0.000  | -0.803 | P | 577.587   | P | 836.220   | P | 1459.073  | LOC_Os06g04920.1 |
| DG <sub>HP</sub> | Os052153_01 | S2 | 0.000  | 0.867  | P | 242.504   | P | 301.741   | P | 165.440   | LOC_Os03g14530.1 |
| DG <sub>HP</sub> | Os052203_01 | S2 | 0.946  | 0.000  | P | 114.163   | P | 219.904   | P | 283.817   | LOC_Os03g07480.2 |
| DG <sub>HP</sub> | Os052312_01 | S2 | 0.749  | 0.000  | P | 122.954   | P | 206.708   | P | 202.431   | LOC_Os07g09060.2 |
| DG <sub>HP</sub> | Os052326_01 | S2 | 0.777  | 0.000  | P | 166.992   | P | 286.064   | P | 321.880   | LOC_Os02g01920.1 |
| DG <sub>HP</sub> | Os052354_01 | S2 | -1.087 | -0.675 | P | 806.767   | P | 379.812   | P | 606.214   | LOC_Os04g46830.1 |
| DG <sub>HP</sub> | Os052399_01 | S2 | 0.000  | -0.696 | P | 433.456   | P | 310.070   | P | 502.489   | LOC_Os12g43370.2 |
| DG <sub>HP</sub> | Os052477_01 | S2 | 0.000  | 0.890  | P | 160.233   | P | 195.597   | P | 105.524   | LOC_Os01g65330.1 |
| DG <sub>HP</sub> | Os052508_01 | S2 | 0.000  | 0.844  | P | 299.616   | P | 270.709   | P | 150.818   | LOC_Os10g42860.1 |

|                  |             |    |        |        |   |           |   |           |   |           |                  |
|------------------|-------------|----|--------|--------|---|-----------|---|-----------|---|-----------|------------------|
| DG <sub>HP</sub> | Os052844_01 | S2 | -1.684 | 0.000  | P | 1649.071  | P | 513.128   | P | 776.072   | -                |
| DG <sub>HP</sub> | Os052911_01 | S2 | 3.762  | 0.000  | P | 524.754   | P | 7121.497  | P | 5168.331  | LOC_Os08g04500.1 |
| DG <sub>HP</sub> | Os052934_01 | S2 | 0.751  | 0.854  | P | 650.082   | P | 1094.197  | P | 605.410   | LOC_Os06g16640.1 |
| DG <sub>HP</sub> | Os052941_01 | S2 | -0.803 | 0.000  | P | 512.053   | P | 293.548   | P | 258.644   | LOC_Os02g37320.1 |
| DG <sub>HP</sub> | Os053144_01 | S2 | 1.647  | 0.000  | P | 356.065   | P | 1114.999  | P | 1631.006  | LOC_Os01g65169.1 |
| DG <sub>HP</sub> | Os053281_01 | S2 | 0.000  | -0.996 | P | 1083.047  | P | 709.916   | P | 1416.030  | LOC_Os01g18440.1 |
| DG <sub>HP</sub> | Os053343_01 | S2 | -0.985 | 0.856  | P | 670.632   | P | 338.876   | P | 187.279   | LOC_Os03g25500.1 |
| DG <sub>HP</sub> | Os053469_01 | S2 | 0.000  | -0.727 | P | 19914.694 | P | 19566.080 | P | 32390.654 | LOC_Os10g41430.1 |
| DG <sub>HP</sub> | Os053660_01 | S2 | -0.827 | 0.000  | P | 382.231   | P | 215.405   | P | 232.050   | LOC_Os10g41640.1 |
| DG <sub>HP</sub> | Os053800_01 | S2 | -0.866 | 0.000  | P | 1004.583  | P | 551.204   | P | 584.173   | LOC_Os01g08380.1 |
| DG <sub>HP</sub> | Os053917_01 | S2 | 0.000  | 1.025  | P | 527.301   | P | 413.910   | P | 203.450   | LOC_Os01g67540.1 |
| DG <sub>HP</sub> | Os053922_01 | S2 | -0.969 | 0.000  | P | 540.014   | P | 275.937   | P | 368.737   | LOC_Os08g36500.1 |
| DG <sub>HP</sub> | Os053976_01 | S2 | -1.024 | 10.000 | P | 300.520   | P | 147.818   | A | 97.610    | LOC_Os01g02560.1 |
| DG <sub>HP</sub> | Os054056_01 | S2 | 0.000  | 1.019  | P | 1315.786  | P | 906.471   | P | 447.210   | LOC_Os07g03050.1 |
| DG <sub>HP</sub> | Os054193_01 | S2 | 0.000  | 0.866  | P | 603.251   | P | 480.057   | P | 263.339   | LOC_Os01g15800.1 |
| DG <sub>HP</sub> | Os054267_01 | S2 | -0.939 | 0.000  | P | 778.142   | P | 405.888   | P | 441.729   | -                |
| DG <sub>HP</sub> | Os054395_01 | S2 | -0.806 | 0.000  | P | 1076.635  | P | 615.762   | P | 590.116   | LOC_Os02g41650.2 |
| DG <sub>HP</sub> | Os054493_01 | S2 | 0.722  | 0.000  | P | 358.962   | P | 592.074   | P | 455.440   | LOC_Os03g22810.1 |
| DG <sub>HP</sub> | Os054550_01 | S2 | 0.000  | -0.681 | P | 805.746   | P | 748.125   | P | 1199.363  | LOC_Os06g04070.1 |
| DG <sub>HP</sub> | Os054583_01 | S2 | 0.000  | 0.843  | P | 7281.740  | P | 6589.564  | P | 3674.030  | LOC_Os06g04270.1 |
| DG <sub>HP</sub> | Os054723_01 | S2 | 0.725  | 10.000 | P | 114.465   | P | 189.139   | A | 89.327    | LOC_Os04g49670.1 |
| DG <sub>HP</sub> | Os054731_01 | S2 | -0.988 | -0.785 | P | 460.951   | P | 232.375   | P | 400.278   | -                |
| DG <sub>HP</sub> | Os054741_01 | S2 | 1.131  | 10.000 | P | 107.618   | P | 235.642   | A | 35.326    | -                |
| DG <sub>HP</sub> | Os054785_01 | S2 | -1.137 | -0.784 | P | 428.921   | P | 195.003   | P | 335.873   | LOC_Os01g09220.1 |
| DG <sub>HP</sub> | Os054838_01 | S2 | 0.889  | 10.000 | P | 103.773   | P | 192.216   | A | 61.783    | LOC_Os03g13800.1 |
| DG <sub>HP</sub> | Os054977_01 | S2 | 0.000  | 1.017  | P | 795.624   | P | 669.423   | P | 330.790   | LOC_Os01g59970.1 |
| DG <sub>HP</sub> | Os055053_01 | S2 | 0.000  | 0.930  | P | 409.150   | P | 392.210   | P | 205.837   | LOC_Os01g37630.1 |
| DG <sub>HP</sub> | Os055124_01 | S2 | 0.000  | 1.113  | P | 516.528   | P | 616.256   | P | 284.913   | LOC_Os12g36890.1 |
| DG <sub>HP</sub> | Os055155_01 | S2 | 0.000  | 0.854  | P | 729.891   | P | 475.026   | P | 262.829   | LOC_Os12g10220.1 |
| DG <sub>HP</sub> | Os055198_01 | S2 | 0.739  | 0.000  | P | 164.759   | P | 275.046   | P | 297.495   | LOC_Os04g46980.1 |
| DG <sub>HP</sub> | Os055427_01 | S2 | 0.723  | 0.000  | P | 116.173   | P | 191.817   | P | 157.358   | LOC_Os05g08480.1 |

|                  |               |          |                  |                  |   |              |   |           |   |              |                  |
|------------------|---------------|----------|------------------|------------------|---|--------------|---|-----------|---|--------------|------------------|
| DG <sub>HP</sub> | Os055646_01   | S2       | -0.897           | 1.332            | P | 830.017      | P | 445.845   | P | 177.047      | LOC_Os12g29670.1 |
| DG <sub>HP</sub> | Os055745_01   | S2       | 0.000            | 0.946            | P | 222.938      | P | 204.576   | P | 106.169      | LOC_Os07g41090.2 |
| DG <sub>HP</sub> | Os056132_01   | S2       | 1.274            | 0.000            | P | 117.990      | P | 285.329   | P | 232.343      | LOC_Os05g43040.1 |
| DG <sub>HP</sub> | Os056446_01   | S2       | 0.000            | 1.065            | P | 916.288      | P | 1349.823  | P | 645.300      | LOC_Os01g74160.1 |
| DG <sub>HP</sub> | Os056551_01   | S2       | 0.798            | 0.000            | P | 156.058      | P | 271.326   | P | 359.182      | LOC_Os08g37810.1 |
| DG <sub>HP</sub> | Os056638_01   | S2       | 0.000            | -0.669           | P | 176.446      | P | 246.846   | P | 392.460      | -                |
| DG <sub>HP</sub> | Os056762_01   | S2       | 0.778            | 0.000            | P | 1178.898     | P | 2021.744  | P | 2554.277     | LOC_Os03g39830.1 |
| DG <sub>HP</sub> | Os056918_02   | S2       | -0.954           | 0.000            | P | 8068.496     | P | 4165.016  | P | 4437.342     | LOC_Os01g13690.1 |
| DG <sub>HP</sub> | Os056921_02   | S2       | 0.000            | -0.642           | P | 258.384      | P | 229.466   | P | 357.960      | -                |
| DG <sub>HP</sub> | Os056923_02   | S2       | 1.294            | 0.000            | P | 109.460      | P | 268.435   | P | 343.304      | LOC_Os02g06584.2 |
| DG <sub>HP</sub> | Os057173_02   | S2       | 10.000           | -1.408           | A | 57.927       | P | 425.067   | P | 1128.118     | LOC_Os12g37260.1 |
| DG <sub>HP</sub> | Os057211_02   | S2       | 0.797            | 0.000            | P | 432.234      | P | 751.171   | P | 1151.482     | LOC_Os01g05970.1 |
| DG <sub>HP</sub> | Os057369_01   | S2       | 0.000            | -0.740           | P | 2801.869     | P | 1826.688  | P | 3051.601     | LOC_Os03g50310.1 |
| DG <sub>HP</sub> | Os057565_02   | S2       | 0.965            | 0.000            | P | 195.529      | P | 381.790   | P | 387.836      | LOC_Os01g27940.1 |
| DG <sub>HP</sub> | Os057647_02   | S2       | 2.884            | 0.000            | P | 95.651       | P | 706.280   | P | 983.544      | -                |
| DG <sub>HP</sub> | GeneID        | S3       | log2(Ratio(L/9)) | log2(Ratio(L/P)) |   | Bo_9311.flag |   | Bo_9311   |   | Bo_LYP9.flag | Bo_LYP9          |
|                  | Bo_PA64s.flag | Bo_PA64s | -                |                  |   |              |   |           |   |              |                  |
| DG <sub>HP</sub> | Os000012_01   | S3       | 1.153            | 0.000            | P | 347.641      | P | 773.134   | P | 641.778      | LOC_Os02g45180.1 |
| DG <sub>HP</sub> | Os000040_01   | S3       | 1.312            | 0.000            | P | 1041.106     | P | 2584.122  | P | 2465.486     | LOC_Os01g65440.1 |
| DG <sub>HP</sub> | Os000050_01   | S3       | 0.000            | -1.170           | P | 178.570      | P | 205.076   | P | 461.309      | LOC_Os01g28030.1 |
| DG <sub>HP</sub> | Os000054_01   | S3       | 0.000            | -0.987           | P | 170.402      | P | 237.620   | P | 470.889      | LOC_Os06g45300.2 |
| DG <sub>HP</sub> | Os000056_01   | S3       | 0.000            | -1.207           | P | 152.641      | P | 178.896   | P | 413.092      | LOC_Os11g16390.3 |
| DG <sub>HP</sub> | Os000119_01   | S3       | 0.000            | -1.239           | P | 135.497      | P | 199.561   | P | 471.055      | LOC_Os03g24339.1 |
| DG <sub>HP</sub> | Os000128_01   | S3       | 1.737            | 0.000            | P | 354.112      | P | 1180.493  | P | 920.163      | LOC_Os06g12740.1 |
| DG <sub>HP</sub> | Os000168_01   | S3       | 0.000            | -1.080           | P | 248.580      | P | 244.850   | P | 517.515      | LOC_Os07g15959.1 |
| DG <sub>HP</sub> | Os000269_01   | S3       | 0.000            | -1.155           | P | 133.708      | P | 175.104   | P | 389.836      | LOC_Os12g31440.1 |
| DG <sub>HP</sub> | Os000380_01   | S3       | -1.258           | 1.844            | P | 2334.250     | P | 975.700   | P | 271.797      | LOC_Os05g47540.1 |
| DG <sub>HP</sub> | Os000400_01   | S3       | 1.319            | 0.000            | P | 192.885      | P | 481.122   | P | 705.572      | -                |
| DG <sub>HP</sub> | Os000406_01   | S3       | 1.122            | 0.000            | P | 261.283      | P | 568.577   | P | 766.799      | LOC_Os07g10720.2 |
| DG <sub>HP</sub> | Os000423_01   | S3       | 1.398            | 0.000            | P | 221.607      | P | 583.997   | P | 899.803      | LOC_Os02g52860.1 |
| DG <sub>HP</sub> | Os000431_01   | S3       | 1.361            | 1.409            | P | 11570.976    | P | 29716.642 | P | 11188.559    | LOC_Os01g68300.1 |

|                  |             |    |        |        |   |          |   |           |   |           |                  |
|------------------|-------------|----|--------|--------|---|----------|---|-----------|---|-----------|------------------|
| DG <sub>HP</sub> | Os000515_01 | S3 | 1.193  | 0.000  | P | 286.816  | P | 655.946   | P | 1011.071  | LOC_Os02g03010.1 |
| DG <sub>HP</sub> | Os000540_01 | S3 | 0.000  | -1.091 | P | 135.351  | P | 196.875   | P | 419.356   | LOC_Os09g32470.1 |
| DG <sub>HP</sub> | Os000575_01 | S3 | 1.133  | 0.000  | P | 290.970  | P | 638.277   | P | 592.324   | LOC_Os11g20160.1 |
| DG <sub>HP</sub> | Os000586_01 | S3 | 1.210  | 0.000  | P | 123.952  | P | 286.733   | P | 435.509   | LOC_Os09g11510.1 |
| DG <sub>HP</sub> | Os000827_01 | S3 | 0.000  | -1.136 | P | 168.669  | P | 234.233   | P | 514.624   | LOC_Os03g31730.1 |
| DG <sub>HP</sub> | Os000842_01 | S3 | 1.613  | 0.000  | P | 5454.425 | P | 16685.998 | P | 11623.969 | LOC_Os12g33130.1 |
| DG <sub>HP</sub> | Os000894_01 | S3 | 0.000  | -0.982 | P | 254.689  | P | 183.018   | P | 361.545   | LOC_Os02g08010.1 |
| DG <sub>HP</sub> | Os000896_01 | S3 | 1.274  | 0.000  | P | 171.832  | P | 415.665   | P | 512.755   | LOC_Os01g67220.2 |
| DG <sub>HP</sub> | Os000917_01 | S3 | 0.000  | -1.714 | P | 163.561  | P | 144.685   | P | 474.774   | LOC_Os05g23430.1 |
| DG <sub>HP</sub> | Os000928_01 | S3 | 0.000  | 1.525  | P | 328.191  | P | 362.648   | P | 126.024   | LOC_Os05g05800.1 |
| DG <sub>HP</sub> | Os001046_01 | S3 | 0.000  | -1.335 | P | 147.485  | P | 273.375   | P | 689.622   | LOC_Os03g02514.1 |
| DG <sub>HP</sub> | Os001183_01 | S3 | 1.449  | 0.000  | P | 174.221  | P | 475.493   | P | 503.144   | LOC_Os11g13930.1 |
| DG <sub>HP</sub> | Os001211_01 | S3 | 1.251  | -1.111 | P | 119.249  | P | 283.867   | P | 612.966   | LOC_Os04g42290.1 |
| DG <sub>HP</sub> | Os001213_01 | S3 | 0.000  | 1.545  | P | 1204.312 | P | 1025.213  | P | 351.413   | LOC_Os05g14860.1 |
| DG <sub>HP</sub> | Os001215_01 | S3 | 0.000  | -0.969 | P | 294.285  | P | 335.238   | P | 655.995   | LOC_Os03g55450.2 |
| DG <sub>HP</sub> | Os001260_01 | S3 | 0.000  | -1.205 | P | 132.230  | P | 138.841   | P | 320.027   | LOC_Os06g15910.1 |
| DG <sub>HP</sub> | Os001286_01 | S3 | 0.000  | -1.596 | P | 170.904  | P | 168.545   | P | 509.365   | LOC_Os08g06520.1 |
| DG <sub>HP</sub> | Os001385_01 | S3 | -0.937 | 0.000  | P | 2197.516 | P | 1147.564  | P | 936.036   | LOC_Os02g05470.1 |
| DG <sub>HP</sub> | Os001472_01 | S3 | 1.121  | 0.000  | P | 193.059  | P | 419.890   | P | 514.837   | LOC_Os09g10760.1 |
| DG <sub>HP</sub> | Os001486_01 | S3 | 0.000  | -0.964 | P | 189.404  | P | 248.519   | P | 484.949   | LOC_Os03g10140.1 |
| DG <sub>HP</sub> | Os001529_01 | S3 | 1.883  | 0.000  | P | 1262.598 | P | 4656.967  | P | 5482.930  | LOC_Os01g60830.1 |
| DG <sub>HP</sub> | Os001539_01 | S3 | 0.000  | -1.282 | P | 125.967  | P | 202.675   | P | 492.868   | LOC_Os03g17410.1 |
| DG <sub>HP</sub> | Os001580_01 | S3 | 0.000  | -1.876 | P | 143.931  | P | 151.632   | P | 556.419   | LOC_Os03g43800.2 |
| DG <sub>HP</sub> | Os001582_01 | S3 | 0.000  | 2.047  | P | 435.215  | P | 489.446   | P | 118.453   | -                |
| DG <sub>HP</sub> | Os001606_01 | S3 | 1.277  | 0.000  | P | 1316.521 | P | 3190.772  | P | 3633.216  | LOC_Os06g44450.1 |
| DG <sub>HP</sub> | Os001631_01 | S3 | 0.000  | -1.084 | P | 148.926  | P | 252.783   | P | 535.765   | LOC_Os03g16700.3 |
| DG <sub>HP</sub> | Os001636_01 | S3 | 1.124  | 0.000  | P | 121.075  | P | 263.849   | P | 317.822   | LOC_Os07g04020.1 |
| DG <sub>HP</sub> | Os001722_01 | S3 | 1.175  | 0.000  | P | 164.551  | P | 371.462   | P | 416.580   | LOC_Os07g10256.1 |
| DG <sub>HP</sub> | Os001727_01 | S3 | 0.000  | -1.039 | P | 169.823  | P | 150.717   | P | 309.646   | LOC_Os03g44500.1 |
| DG <sub>HP</sub> | Os001770_01 | S3 | 1.166  | 0.000  | P | 231.796  | P | 519.987   | P | 577.718   | LOC_Os03g48920.1 |
| DG <sub>HP</sub> | Os001813_01 | S3 | 1.236  | 0.000  | P | 146.778  | P | 345.635   | P | 431.757   | LOC_Os05g04850.1 |

|                  |             |    |        |        |   |          |   |           |   |           |                  |
|------------------|-------------|----|--------|--------|---|----------|---|-----------|---|-----------|------------------|
| DG <sub>HP</sub> | Os001855_01 | S3 | -1.449 | 0.000  | P | 606.961  | P | 222.301   | P | 103.366   | LOC_Os09g35020.1 |
| DG <sub>HP</sub> | Os001862_01 | S3 | 1.216  | -1.099 | P | 143.718  | P | 333.850   | P | 715.108   | LOC_Os01g66320.1 |
| DG <sub>HP</sub> | Os001930_01 | S3 | 0.000  | 1.663  | P | 2243.701 | P | 1725.806  | P | 544.889   | LOC_Os06g49640.1 |
| DG <sub>HP</sub> | Os001957_01 | S3 | -1.076 | 0.000  | P | 1143.040 | P | 542.011   | P | 391.921   | LOC_Os07g38230.1 |
| DG <sub>HP</sub> | Os002092_01 | S3 | 1.318  | 0.000  | P | 491.262  | P | 1224.571  | P | 1605.279  | LOC_Os02g04510.1 |
| DG <sub>HP</sub> | Os002166_02 | S3 | 1.371  | 0.000  | P | 327.691  | P | 847.404   | P | 788.214   | -                |
| DG <sub>HP</sub> | Os002369_01 | S3 | 0.000  | -1.032 | P | 219.367  | P | 224.900   | P | 459.876   | -                |
| DG <sub>HP</sub> | Os002390_01 | S3 | 2.278  | 1.933  | P | 2660.653 | P | 12900.030 | P | 3378.061  | LOC_Os07g05360.1 |
| DG <sub>HP</sub> | Os002448_01 | S3 | 10.000 | -1.187 | A | 98.143   | P | 150.181   | P | 341.842   | LOC_Os02g16730.1 |
| DG <sub>HP</sub> | Os002532_01 | S3 | 1.240  | 0.000  | P | 104.366  | P | 246.508   | P | 294.647   | LOC_Os03g60260.1 |
| DG <sub>HP</sub> | Os002671_01 | S3 | 0.000  | -1.227 | P | 149.378  | P | 190.402   | P | 445.665   | LOC_Os03g51440.1 |
| DG <sub>HP</sub> | Os002678_01 | S3 | -1.305 | 0.000  | P | 5788.930 | P | 2343.092  | P | 981.952   | LOC_Os05g03920.1 |
| DG <sub>HP</sub> | Os002812_01 | S3 | 10.000 | -1.079 | A | 110.888  | P | 171.269   | P | 361.812   | LOC_Os02g53210.3 |
| DG <sub>HP</sub> | Os002898_01 | S3 | 1.111  | 0.000  | P | 188.861  | P | 407.903   | P | 444.077   | LOC_Os11g11330.1 |
| DG <sub>HP</sub> | Os003424_01 | S3 | 1.394  | 0.000  | P | 112.845  | P | 296.609   | P | 297.913   | LOC_Os12g29550.1 |
| DG <sub>HP</sub> | Os003800_01 | S3 | 0.000  | -1.319 | P | 95.446   | P | 156.325   | P | 389.888   | LOC_Os02g08490.1 |
| DG <sub>HP</sub> | Os003956_02 | S3 | 0.000  | 1.564  | P | 196.066  | P | 314.892   | P | 106.486   | -                |
| DG <sub>HP</sub> | Os004343_01 | S3 | 0.000  | 1.447  | P | 722.710  | P | 586.480   | P | 215.173   | LOC_Os06g14030.1 |
| DG <sub>HP</sub> | Os004399_01 | S3 | -2.382 | 10.000 | P | 2786.725 | P | 534.473   | A | 57.518    | LOC_Os02g40180.1 |
| DG <sub>HP</sub> | Os005103_01 | S3 | 1.333  | 0.000  | P | 101.835  | P | 256.596   | P | 269.308   | LOC_Os09g18159.1 |
| DG <sub>HP</sub> | Os006161_02 | S3 | 0.000  | -0.990 | P | 212.184  | P | 252.184   | P | 500.750   | -                |
| DG <sub>HP</sub> | Os006546_02 | S3 | 1.430  | 0.000  | P | 94.416   | P | 254.477   | P | 235.018   | -                |
| DG <sub>HP</sub> | Os006663_01 | S3 | -1.346 | 0.000  | P | 524.932  | P | 206.551   | P | 182.697   | -                |
| DG <sub>HP</sub> | Os007263_01 | S3 | 2.074  | 0.000  | P | 1921.936 | P | 8091.525  | P | 11500.748 | LOC_Os12g33150.1 |
| DG <sub>HP</sub> | Os007671_01 | S3 | 1.610  | 0.000  | P | 191.985  | P | 586.187   | P | 783.429   | LOC_Os07g28040.1 |
| DG <sub>HP</sub> | Os008106_01 | S3 | 10.000 | -1.369 | A | 84.139   | P | 150.344   | P | 388.348   | -                |
| DG <sub>HP</sub> | Os008153_02 | S3 | 1.406  | 0.000  | P | 331.298  | P | 878.011   | P | 1232.415  | -                |
| DG <sub>HP</sub> | Os008192_01 | S3 | 1.470  | 0.000  | P | 187.095  | P | 518.454   | P | 459.511   | LOC_Os09g24620.1 |
| DG <sub>HP</sub> | Os008368_01 | S3 | 1.445  | 0.000  | P | 104.455  | P | 284.306   | P | 154.348   | LOC_Os09g14680.1 |
| DG <sub>HP</sub> | Os008439_01 | S3 | 1.283  | 0.000  | P | 151.878  | P | 369.680   | P | 407.032   | LOC_Os07g44740.1 |
| DG <sub>HP</sub> | Os008441_01 | S3 | 0.000  | 1.289  | P | 683.207  | P | 623.112   | P | 254.974   | LOC_Os03g49190.1 |



|                  |             |    |        |        |   |          |   |          |   |           |                  |
|------------------|-------------|----|--------|--------|---|----------|---|----------|---|-----------|------------------|
| DG <sub>HP</sub> | Os008450_01 | S3 | 1.434  | 0.000  | P | 610.488  | P | 1649.626 | P | 1003.716  | LOC_Os01g67980.1 |
| DG <sub>HP</sub> | Os008472_01 | S3 | -1.115 | 0.000  | P | 611.741  | P | 282.446  | P | 271.912   | LOC_Os07g08860.1 |
| DG <sub>HP</sub> | Os008486_01 | S3 | 1.259  | 0.000  | P | 199.564  | P | 477.536  | P | 643.411   | LOC_Os02g40730.1 |
| DG <sub>HP</sub> | Os008529_01 | S3 | 1.320  | 0.000  | P | 267.444  | P | 667.909  | P | 854.903   | LOC_Os07g02210.2 |
| DG <sub>HP</sub> | Os008538_01 | S3 | 0.000  | -1.208 | P | 518.177  | P | 1034.895 | P | 2390.001  | LOC_Os03g18070.1 |
| DG <sub>HP</sub> | Os008556_01 | S3 | 1.531  | 0.000  | P | 2182.051 | P | 6303.891 | P | 11475.546 | LOC_Os02g44630.2 |
| DG <sub>HP</sub> | Os008557_01 | S3 | 10.000 | -1.302 | A | 58.744   | P | 172.656  | P | 425.764   | LOC_Os07g29610.1 |
| DG <sub>HP</sub> | Os008559_01 | S3 | -1.023 | 0.000  | P | 860.040  | P | 423.363  | P | 190.569   | LOC_Os05g51640.1 |
| DG <sub>HP</sub> | Os008602_01 | S3 | 1.296  | 0.000  | P | 495.134  | P | 1215.885 | P | 1594.391  | LOC_Os05g06920.1 |
| DG <sub>HP</sub> | Os008621_01 | S3 | 1.289  | 0.000  | P | 138.935  | P | 339.584  | P | 327.278   | LOC_Os02g30624.2 |
| DG <sub>HP</sub> | Os008639_01 | S3 | 1.114  | 0.000  | P | 105.650  | P | 228.606  | P | 212.329   | LOC_Os01g50370.1 |
| DG <sub>HP</sub> | Os008640_01 | S3 | -1.109 | 0.000  | P | 824.225  | P | 382.060  | P | 268.669   | LOC_Os02g32814.1 |
| DG <sub>HP</sub> | Os008668_01 | S3 | 1.679  | 0.000  | P | 276.103  | P | 883.930  | P | 1503.699  | LOC_Os11g04720.2 |
| DG <sub>HP</sub> | Os008685_01 | S3 | -0.943 | 0.000  | P | 1970.092 | P | 1024.890 | P | 675.861   | -                |
| DG <sub>HP</sub> | Os008702_01 | S3 | 1.197  | 0.000  | P | 93.696   | P | 214.791  | P | 219.714   | LOC_Os06g11430.1 |
| DG <sub>HP</sub> | Os008721_01 | S3 | 0.000  | -1.047 | P | 114.253  | P | 244.218  | P | 504.780   | LOC_Os03g17740.1 |
| DG <sub>HP</sub> | Os008740_01 | S3 | 1.714  | -1.567 | P | 876.399  | P | 2874.378 | P | 8516.821  | LOC_Os04g45490.1 |
| DG <sub>HP</sub> | Os008745_01 | S3 | 1.454  | 0.000  | P | 311.632  | P | 853.922  | P | 1341.970  | LOC_Os06g05880.1 |
| DG <sub>HP</sub> | Os008765_01 | S3 | 1.154  | 0.000  | P | 160.116  | P | 356.327  | P | 357.811   | LOC_Os09g20660.1 |
| DG <sub>HP</sub> | Os008778_01 | S3 | -1.603 | 0.000  | P | 3903.760 | P | 1284.702 | P | 1138.161  | LOC_Os05g31000.1 |
| DG <sub>HP</sub> | Os008783_01 | S3 | -0.919 | 0.000  | P | 579.672  | P | 306.647  | P | 138.636   | LOC_Os01g16890.1 |
| DG <sub>HP</sub> | Os008787_01 | S3 | 0.000  | -1.140 | P | 234.654  | P | 369.045  | P | 813.154   | LOC_Os02g47560.1 |
| DG <sub>HP</sub> | Os008849_01 | S3 | 1.152  | 0.000  | P | 185.234  | P | 411.740  | P | 418.975   | LOC_Os06g44374.1 |
| DG <sub>HP</sub> | Os008886_01 | S3 | 1.317  | 0.000  | P | 371.366  | P | 924.971  | P | 1449.113  | LOC_Os11g10990.1 |
| DG <sub>HP</sub> | Os008896_01 | S3 | 0.000  | -1.153 | P | 378.264  | P | 326.358  | P | 725.925   | LOC_Os04g51520.1 |
| DG <sub>HP</sub> | Os008899_01 | S3 | 1.539  | 0.000  | P | 110.724  | P | 321.785  | P | 443.902   | LOC_Os08g39870.1 |
| DG <sub>HP</sub> | Os008905_01 | S3 | 0.000  | -1.065 | P | 210.297  | P | 398.361  | P | 833.279   | LOC_Os06g37000.2 |
| DG <sub>HP</sub> | Os008928_01 | S3 | 1.117  | 0.000  | P | 116.341  | P | 252.414  | P | 376.320   | LOC_Os03g59710.1 |
| DG <sub>HP</sub> | Os008970_01 | S3 | 1.241  | 0.000  | P | 111.480  | P | 263.582  | P | 320.611   | LOC_Os09g20900.1 |
| DG <sub>HP</sub> | Os009036_01 | S3 | -0.962 | 0.000  | P | 7104.860 | P | 3646.334 | P | 2848.731  | LOC_Os12g30540.1 |
| DG <sub>HP</sub> | Os009088_01 | S3 | 1.531  | 1.649  | P | 181.570  | P | 524.803  | P | 167.339   | LOC_Os05g12400.1 |

|                  |             |    |        |        |   |           |   |           |   |           |                  |
|------------------|-------------|----|--------|--------|---|-----------|---|-----------|---|-----------|------------------|
| DG <sub>HP</sub> | Os009099_01 | S3 | 1.248  | 0.000  | P | 233.336   | P | 554.067   | P | 487.347   | LOC_Os06g39912.1 |
| DG <sub>HP</sub> | Os009107_01 | S3 | 0.000  | 2.045  | P | 898.289   | P | 700.761   | P | 169.847   | LOC_Os02g50130.1 |
| DG <sub>HP</sub> | Os009117_01 | S3 | 1.422  | 0.000  | P | 2719.474  | P | 7288.976  | P | 7736.244  | LOC_Os12g02320.1 |
| DG <sub>HP</sub> | Os009123_01 | S3 | 1.257  | 0.000  | P | 115.609   | P | 276.232   | P | 320.696   | LOC_Os02g32980.1 |
| DG <sub>HP</sub> | Os009124_01 | S3 | 1.663  | 0.000  | P | 12769.665 | P | 40428.659 | P | 40618.441 | LOC_Os12g02310.1 |
| DG <sub>HP</sub> | Os009192_01 | S3 | 1.178  | 0.000  | P | 117.740   | P | 266.404   | P | 404.831   | LOC_Os01g50460.1 |
| DG <sub>HP</sub> | Os009286_01 | S3 | -1.283 | 0.000  | P | 785.284   | P | 322.763   | P | 218.206   | LOC_Os02g34860.1 |
| DG <sub>HP</sub> | Os009330_01 | S3 | 0.000  | -1.244 | P | 129.081   | P | 155.176   | P | 367.525   | LOC_Os01g07730.1 |
| DG <sub>HP</sub> | Os009346_01 | S3 | 1.161  | 0.000  | P | 845.301   | P | 1890.638  | P | 2884.290  | LOC_Os03g52660.1 |
| DG <sub>HP</sub> | Os009446_01 | S3 | 1.100  | 0.000  | P | 116.838   | P | 250.512   | P | 398.272   | LOC_Os04g47420.1 |
| DG <sub>HP</sub> | Os009504_01 | S3 | 0.000  | -1.455 | P | 183.949   | P | 177.133   | P | 485.753   | LOC_Os02g03410.1 |
| DG <sub>HP</sub> | Os009518_01 | S3 | 1.179  | 0.000  | P | 2836.484  | P | 6423.194  | P | 7246.267  | LOC_Os01g73250.1 |
| DG <sub>HP</sub> | Os009556_01 | S3 | 1.524  | -0.980 | P | 1012.907  | P | 2911.985  | P | 5743.558  | LOC_Os03g59320.1 |
| DG <sub>HP</sub> | Os009562_01 | S3 | 1.202  | 0.000  | P | 778.059   | P | 1789.457  | P | 2298.158  | LOC_Os03g22270.1 |
| DG <sub>HP</sub> | Os009586_01 | S3 | 1.556  | 0.000  | P | 235.626   | P | 693.017   | P | 1013.250  | LOC_Os03g14040.3 |
| DG <sub>HP</sub> | Os009592_01 | S3 | 0.000  | -1.166 | P | 324.889   | P | 650.648   | P | 1459.573  | LOC_Os05g40180.1 |
| DG <sub>HP</sub> | Os009664_01 | S3 | 0.000  | -1.299 | P | 123.543   | P | 198.909   | P | 489.270   | LOC_Os03g04470.1 |
| DG <sub>HP</sub> | Os009705_01 | S3 | 1.139  | 0.000  | P | 136.753   | P | 301.090   | P | 461.139   | LOC_Os03g05280.1 |
| DG <sub>HP</sub> | Os009747_01 | S3 | -0.972 | 0.000  | P | 1337.972  | P | 681.947   | P | 680.313   | LOC_Os05g45050.1 |
| DG <sub>HP</sub> | Os009753_01 | S3 | 0.000  | 1.446  | P | 381.780   | P | 369.577   | P | 135.678   | -                |
| DG <sub>HP</sub> | Os009774_01 | S3 | 1.613  | 0.000  | P | 99.093    | P | 303.166   | P | 479.340   | LOC_Os04g45090.1 |
| DG <sub>HP</sub> | Os009786_01 | S3 | -1.014 | 0.000  | P | 789.224   | P | 390.726   | P | 365.486   | LOC_Os03g24020.1 |
| DG <sub>HP</sub> | Os009787_01 | S3 | 2.365  | 0.000  | P | 316.726   | P | 1631.886  | P | 1318.209  | LOC_Os07g23120.1 |
| DG <sub>HP</sub> | Os009844_01 | S3 | 1.622  | 0.000  | P | 2201.903  | P | 6778.498  | P | 12351.941 | LOC_Os12g08730.1 |
| DG <sub>HP</sub> | Os009847_01 | S3 | 0.000  | -1.263 | P | 393.898   | P | 571.332   | P | 1371.472  | LOC_Os09g02710.1 |
| DG <sub>HP</sub> | Os009852_01 | S3 | 1.126  | 0.000  | P | 188.289   | P | 410.957   | P | 474.562   | LOC_Os03g38020.1 |
| DG <sub>HP</sub> | Os009869_01 | S3 | 1.145  | 0.000  | P | 146.035   | P | 322.929   | P | 425.232   | LOC_Os04g20230.1 |
| DG <sub>HP</sub> | Os009907_01 | S3 | 0.000  | 1.291  | P | 287.280   | P | 227.452   | P | 92.939    | LOC_Os03g02690.1 |
| DG <sub>HP</sub> | Os009921_01 | S3 | 1.422  | -1.047 | P | 286.344   | P | 767.180   | P | 1585.465  | LOC_Os02g50620.1 |
| DG <sub>HP</sub> | Os010022_01 | S3 | 0.000  | 1.337  | P | 560.321   | P | 427.046   | P | 169.041   | LOC_Os08g05550.1 |
| DG <sub>HP</sub> | Os010034_01 | S3 | 1.655  | 0.000  | P | 470.580   | P | 1482.045  | P | 2367.358  | LOC_Os01g68940.1 |

|                  |             |    |        |        |   |          |   |           |   |           |                  |
|------------------|-------------|----|--------|--------|---|----------|---|-----------|---|-----------|------------------|
| DG <sub>HP</sub> | Os010115_01 | S3 | -1.449 | 0.000  | P | 3652.464 | P | 1338.114  | P | 760.652   | LOC_Os09g36040.1 |
| DG <sub>HP</sub> | Os010136_01 | S3 | -1.215 | 1.485  | P | 1484.563 | P | 639.575   | P | 228.472   | LOC_Os11g06730.1 |
| DG <sub>HP</sub> | Os010210_01 | S3 | -0.970 | 0.000  | P | 775.385  | P | 395.900   | P | 211.521   | LOC_Os07g42730.1 |
| DG <sub>HP</sub> | Os010213_01 | S3 | 1.659  | 1.722  | P | 130.553  | P | 412.145   | P | 124.900   | LOC_Os08g07690.1 |
| DG <sub>HP</sub> | Os010228_01 | S3 | 0.000  | 1.562  | P | 397.625  | P | 344.819   | P | 116.823   | -                |
| DG <sub>HP</sub> | Os010273_01 | S3 | 0.000  | -1.139 | P | 544.489  | P | 352.741   | P | 776.630   | LOC_Os04g30420.1 |
| DG <sub>HP</sub> | Os010313_01 | S3 | -1.400 | 0.000  | P | 634.947  | P | 240.638   | P | 214.772   | LOC_Os08g36920.1 |
| DG <sub>HP</sub> | Os010372_01 | S3 | 1.590  | -1.779 | P | 4620.299 | P | 13911.576 | P | 47758.151 | LOC_Os01g14410.1 |
| DG <sub>HP</sub> | Os010407_01 | S3 | 1.512  | 0.000  | P | 156.368  | P | 445.983   | P | 560.729   | LOC_Os08g08120.3 |
| DG <sub>HP</sub> | Os010501_01 | S3 | 2.345  | 0.000  | P | 248.125  | P | 1260.477  | P | 1985.196  | LOC_Os09g26670.1 |
| DG <sub>HP</sub> | Os010652_01 | S3 | 0.000  | -0.973 | P | 246.415  | P | 453.077   | P | 889.216   | -                |
| DG <sub>HP</sub> | Os010677_01 | S3 | 1.185  | -1.445 | P | 129.616  | P | 294.777   | P | 802.404   | -                |
| DG <sub>HP</sub> | Os010869_01 | S3 | 0.000  | 1.998  | P | 561.526  | P | 573.926   | P | 143.645   | LOC_Os07g43020.1 |
| DG <sub>HP</sub> | Os010948_01 | S3 | -1.795 | 1.377  | P | 2078.101 | P | 598.943   | P | 230.667   | LOC_Os03g03724.2 |
| DG <sub>HP</sub> | Os011258_01 | S3 | 0.000  | 1.624  | P | 1004.867 | P | 981.938   | P | 318.678   | LOC_Os06g49740.1 |
| DG <sub>HP</sub> | Os011344_01 | S3 | 0.000  | 1.538  | P | 599.377  | P | 650.646   | P | 224.055   | -                |
| DG <sub>HP</sub> | Os011371_01 | S3 | 0.000  | 1.622  | P | 475.774  | P | 500.809   | P | 162.749   | LOC_Os07g01920.1 |
| DG <sub>HP</sub> | Os011450_01 | S3 | 1.510  | 0.000  | P | 302.476  | P | 861.530   | P | 1324.413  | LOC_Os01g72160.1 |
| DG <sub>HP</sub> | Os011561_01 | S3 | -0.947 | 2.610  | P | 1187.919 | P | 616.302   | P | 100.971   | LOC_Os09g10340.1 |
| DG <sub>HP</sub> | Os011601_01 | S3 | -0.976 | 0.000  | P | 686.174  | P | 348.751   | P | 214.918   | LOC_Os08g41990.1 |
| DG <sub>HP</sub> | Os011626_01 | S3 | -1.069 | 1.668  | P | 1307.327 | P | 622.941   | P | 196.068   | LOC_Os02g15900.1 |
| DG <sub>HP</sub> | Os011643_01 | S3 | 0.000  | 2.112  | P | 803.511  | P | 949.385   | P | 219.585   | LOC_Os06g14420.1 |
| DG <sub>HP</sub> | Os011651_01 | S3 | 0.000  | 1.418  | P | 867.756  | P | 654.770   | P | 245.041   | LOC_Os09g13570.1 |
| DG <sub>HP</sub> | Os011662_01 | S3 | -1.534 | 0.000  | P | 3530.075 | P | 1219.200  | P | 693.537   | LOC_Os07g34570.2 |
| DG <sub>HP</sub> | Os011667_01 | S3 | 1.264  | 0.000  | P | 105.475  | P | 253.322   | P | 372.629   | LOC_Os01g60430.1 |
| DG <sub>HP</sub> | Os011669_01 | S3 | 0.000  | 1.369  | P | 414.566  | P | 401.331   | P | 155.401   | LOC_Os04g36054.1 |
| DG <sub>HP</sub> | Os011722_01 | S3 | 0.000  | 1.876  | P | 611.944  | P | 545.023   | P | 148.508   | LOC_Os03g03390.1 |
| DG <sub>HP</sub> | Os011759_01 | S3 | -1.127 | 0.000  | P | 431.858  | P | 197.752   | P | 174.904   | LOC_Os04g41920.2 |
| DG <sub>HP</sub> | Os011816_01 | S3 | 0.000  | 2.456  | P | 1044.057 | P | 2117.591  | P | 386.028   | -                |
| DG <sub>HP</sub> | Os011839_01 | S3 | 0.000  | 2.441  | P | 1530.957 | P | 926.364   | P | 170.547   | LOC_Os01g02060.2 |
| DG <sub>HP</sub> | Os011858_01 | S3 | 0.000  | 1.487  | P | 878.955  | P | 858.093   | P | 306.071   | LOC_Os05g33880.2 |

|                  |             |    |        |        |   |          |   |          |   |          |                  |
|------------------|-------------|----|--------|--------|---|----------|---|----------|---|----------|------------------|
| DG <sub>HP</sub> | Os011897_01 | S3 | 0.000  | -1.015 | P | 1224.785 | P | 1093.770 | P | 2210.940 | LOC_Os03g19760.2 |
| DG <sub>HP</sub> | Os011950_01 | S3 | 0.000  | 1.463  | P | 854.105  | P | 791.295  | P | 287.075  | LOC_Os04g31070.1 |
| DG <sub>HP</sub> | Os011979_01 | S3 | 0.000  | 1.339  | P | 604.379  | P | 647.186  | P | 255.803  | LOC_Os06g35160.1 |
| DG <sub>HP</sub> | Os012021_01 | S3 | 0.000  | 1.320  | P | 399.095  | P | 507.811  | P | 203.453  | LOC_Os01g73000.3 |
| DG <sub>HP</sub> | Os012023_01 | S3 | 0.000  | 1.627  | P | 790.616  | P | 568.146  | P | 183.911  | LOC_Os02g14770.3 |
| DG <sub>HP</sub> | Os012028_01 | S3 | 0.000  | 1.330  | P | 6820.046 | P | 9805.662 | P | 3901.095 | LOC_Os11g47760.1 |
| DG <sub>HP</sub> | Os012121_01 | S3 | 0.000  | 1.774  | P | 335.905  | P | 372.675  | P | 108.972  | LOC_Os12g24170.1 |
| DG <sub>HP</sub> | Os012122_01 | S3 | 0.000  | 1.569  | P | 469.921  | P | 413.412  | P | 139.340  | LOC_Os03g22380.2 |
| DG <sub>HP</sub> | Os012189_01 | S3 | -1.032 | 10.000 | P | 336.951  | P | 164.813  | A | 111.046  | LOC_Os05g05480.1 |
| DG <sub>HP</sub> | Os012349_01 | S3 | -1.184 | 0.000  | P | 2443.945 | P | 1075.511 | P | 1142.773 | LOC_Os03g61220.1 |
| DG <sub>HP</sub> | Os012350_01 | S3 | 0.000  | 1.273  | P | 355.670  | P | 312.247  | P | 129.240  | LOC_Os04g38640.1 |
| DG <sub>HP</sub> | Os012391_01 | S3 | -0.958 | 0.000  | P | 410.875  | P | 211.555  | P | 104.603  | LOC_Os09g39420.1 |
| DG <sub>HP</sub> | Os012394_01 | S3 | 0.000  | 1.484  | P | 253.854  | P | 256.297  | P | 91.636   | LOC_Os02g56740.1 |
| DG <sub>HP</sub> | Os012417_01 | S3 | 2.233  | 0.000  | P | 226.790  | P | 1065.958 | P | 1044.234 | LOC_Os04g47360.1 |
| DG <sub>HP</sub> | Os012428_01 | S3 | 0.000  | 1.281  | P | 252.992  | P | 195.684  | P | 80.529   | LOC_Os03g11200.1 |
| DG <sub>HP</sub> | Os012475_01 | S3 | 0.000  | 1.659  | P | 229.119  | P | 231.840  | P | 73.422   | LOC_Os02g57820.1 |
| DG <sub>HP</sub> | Os012491_01 | S3 | 0.000  | 1.293  | P | 522.437  | P | 504.842  | P | 206.056  | LOC_Os03g54790.1 |
| DG <sub>HP</sub> | Os012493_01 | S3 | 0.000  | 1.527  | P | 420.684  | P | 458.468  | P | 159.051  | LOC_Os03g11720.1 |
| DG <sub>HP</sub> | Os012586_01 | S3 | 0.000  | -1.478 | P | 251.717  | P | 296.439  | P | 825.509  | LOC_Os08g15444.1 |
| DG <sub>HP</sub> | Os012632_01 | S3 | -1.146 | 0.000  | P | 421.445  | P | 190.431  | P | 156.581  | LOC_Os05g51670.1 |
| DG <sub>HP</sub> | Os012645_01 | S3 | 0.000  | -1.378 | P | 809.827  | P | 739.389  | P | 1921.265 | LOC_Os05g41550.5 |
| DG <sub>HP</sub> | Os012753_01 | S3 | -0.924 | 0.000  | P | 8588.591 | P | 4527.109 | P | 4115.888 | -                |
| DG <sub>HP</sub> | Os012754_01 | S3 | -1.034 | 0.000  | P | 542.360  | P | 264.855  | P | 261.127  | LOC_Os03g45400.1 |
| DG <sub>HP</sub> | Os012757_01 | S3 | 0.000  | 1.420  | P | 368.253  | P | 350.687  | P | 131.015  | LOC_Os02g08130.3 |
| DG <sub>HP</sub> | Os012782_01 | S3 | 0.000  | 1.660  | P | 615.159  | P | 424.330  | P | 134.239  | LOC_Os05g49200.2 |
| DG <sub>HP</sub> | Os012829_01 | S3 | -1.490 | 0.000  | P | 1159.827 | P | 412.780  | P | 428.746  | LOC_Os01g18630.1 |
| DG <sub>HP</sub> | Os012846_01 | S3 | -1.034 | 0.000  | P | 834.186  | P | 407.306  | P | 275.459  | LOC_Os07g01214.1 |
| DG <sub>HP</sub> | Os012851_01 | S3 | -1.098 | 0.000  | P | 760.124  | P | 355.022  | P | 298.877  | LOC_Os01g60280.1 |
| DG <sub>HP</sub> | Os012866_01 | S3 | -0.974 | 0.000  | P | 654.631  | P | 333.336  | P | 378.160  | LOC_Os06g41990.2 |
| DG <sub>HP</sub> | Os012876_01 | S3 | 0.000  | -1.020 | P | 1627.325 | P | 1964.890 | P | 3985.711 | LOC_Os05g50550.1 |
| DG <sub>HP</sub> | Os012886_01 | S3 | -0.936 | 0.000  | P | 773.520  | P | 404.253  | P | 443.782  | LOC_Os03g06230.1 |

|                  |             |    |        |        |   |           |   |          |   |          |                  |
|------------------|-------------|----|--------|--------|---|-----------|---|----------|---|----------|------------------|
| DG <sub>HP</sub> | Os012897_01 | S3 | 0.000  | 1.762  | P | 329.398   | P | 409.580  | P | 120.739  | LOC_Os03g04960.2 |
| DG <sub>HP</sub> | Os012955_01 | S3 | 0.000  | 1.366  | P | 931.478   | P | 569.538  | P | 220.954  | LOC_Os12g14440.1 |
| DG <sub>HP</sub> | Os013058_01 | S3 | -1.008 | 2.387  | P | 1286.175  | P | 639.444  | P | 122.234  | LOC_Os04g05010.1 |
| DG <sub>HP</sub> | Os013109_01 | S3 | 0.000  | 1.909  | P | 796.481   | P | 663.225  | P | 176.657  | LOC_Os02g20310.3 |
| DG <sub>HP</sub> | Os013155_01 | S3 | 0.000  | 1.431  | P | 537.598   | P | 438.067  | P | 162.464  | LOC_Os10g31000.2 |
| DG <sub>HP</sub> | Os013156_01 | S3 | 0.000  | 1.429  | P | 1336.051  | P | 1108.844 | P | 411.895  | LOC_Os03g62240.1 |
| DG <sub>HP</sub> | Os013174_01 | S3 | 0.000  | 1.847  | P | 530.343   | P | 445.485  | P | 123.822  | LOC_Os09g10930.3 |
| DG <sub>HP</sub> | Os013253_01 | S3 | 0.000  | -0.977 | P | 269.928   | P | 300.125  | P | 590.707  | LOC_Os03g63910.1 |
| DG <sub>HP</sub> | Os013316_01 | S3 | -1.374 | 0.000  | P | 1065.143  | P | 410.827  | P | 363.210  | LOC_Os03g20640.1 |
| DG <sub>HP</sub> | Os013432_01 | S3 | 0.000  | 1.400  | P | 1259.255  | P | 1081.748 | P | 410.020  | -                |
| DG <sub>HP</sub> | Os013482_01 | S3 | 0.000  | 1.674  | P | 422.531   | P | 428.956  | P | 134.394  | LOC_Os04g36730.1 |
| DG <sub>HP</sub> | Os013483_01 | S3 | 0.000  | 1.446  | P | 246.675   | P | 268.567  | P | 98.595   | LOC_Os01g65480.1 |
| DG <sub>HP</sub> | Os013529_01 | S3 | -0.974 | 0.000  | P | 593.815   | P | 302.396  | P | 331.520  | -                |
| DG <sub>HP</sub> | Os013530_01 | S3 | 0.000  | 1.318  | P | 631.099   | P | 613.472  | P | 246.027  | LOC_Os08g30060.2 |
| DG <sub>HP</sub> | Os013532_01 | S3 | 0.000  | 1.947  | P | 1716.707  | P | 1979.752 | P | 513.448  | LOC_Os01g55094.2 |
| DG <sub>HP</sub> | Os013568_01 | S3 | 0.000  | 1.420  | P | 473.612   | P | 480.502  | P | 179.542  | LOC_Os08g40150.2 |
| DG <sub>HP</sub> | Os013569_01 | S3 | 0.000  | 1.306  | P | 401.684   | P | 340.504  | P | 137.722  | LOC_Os01g53150.2 |
| DG <sub>HP</sub> | Os013589_01 | S3 | 0.000  | 1.425  | P | 811.601   | P | 479.258  | P | 178.538  | LOC_Os08g09270.1 |
| DG <sub>HP</sub> | Os013615_01 | S3 | 0.000  | 1.507  | P | 176.374   | P | 255.301  | P | 89.840   | LOC_Os09g32740.1 |
| DG <sub>HP</sub> | Os013619_01 | S3 | -1.036 | 0.000  | P | 1217.377  | P | 593.571  | P | 391.310  | -                |
| DG <sub>HP</sub> | Os013638_01 | S3 | 0.000  | 1.431  | P | 733.665   | P | 740.409  | P | 274.532  | LOC_Os08g31470.2 |
| DG <sub>HP</sub> | Os013639_01 | S3 | 0.000  | 1.662  | P | 497.094   | P | 535.604  | P | 169.278  | LOC_Os03g20980.1 |
| DG <sub>HP</sub> | Os013641_01 | S3 | -1.133 | 0.000  | P | 418.245   | P | 190.655  | P | 233.909  | LOC_Os01g73120.1 |
| DG <sub>HP</sub> | Os013643_01 | S3 | 0.000  | 1.422  | P | 408.109   | P | 409.960  | P | 152.975  | LOC_Os10g36550.3 |
| DG <sub>HP</sub> | Os013762_01 | S3 | -1.189 | 0.000  | P | 479.268   | P | 210.185  | P | 197.307  | LOC_Os03g53750.1 |
| DG <sub>HP</sub> | Os013814_01 | S3 | 0.000  | -1.023 | P | 306.578   | P | 298.345  | P | 606.463  | LOC_Os06g49430.1 |
| DG <sub>HP</sub> | Os013905_01 | S3 | 0.000  | 1.669  | P | 220.737   | P | 239.868  | P | 75.437   | LOC_Os02g38800.1 |
| DG <sub>HP</sub> | Os013918_01 | S3 | -0.922 | 0.000  | P | 700.612   | P | 369.884  | P | 325.493  | LOC_Os09g29070.1 |
| DG <sub>HP</sub> | Os013945_01 | S3 | -1.244 | 0.000  | P | 1555.689  | P | 656.986  | P | 402.751  | LOC_Os03g38950.1 |
| DG <sub>HP</sub> | Os013969_01 | S3 | 0.000  | 1.547  | P | 323.030   | P | 293.027  | P | 100.273  | LOC_Os07g07610.1 |
| DG <sub>HP</sub> | Os013976_01 | S3 | -1.240 | 0.000  | P | 10004.501 | P | 4236.423 | P | 2669.855 | LOC_Os10g35370.2 |

|                  |             |    |        |        |   |          |   |          |   |          |                  |
|------------------|-------------|----|--------|--------|---|----------|---|----------|---|----------|------------------|
| DG <sub>HP</sub> | Os014124_01 | S3 | 0.000  | -0.987 | P | 691.840  | P | 659.302  | P | 1306.577 | LOC_Os09g25060.1 |
| DG <sub>HP</sub> | Os014307_01 | S3 | 0.000  | 1.575  | P | 665.989  | P | 530.521  | P | 178.041  | LOC_Os07g32630.1 |
| DG <sub>HP</sub> | Os014320_01 | S3 | -1.170 | 0.000  | P | 2888.720 | P | 1284.088 | P | 1358.578 | LOC_Os03g17570.3 |
| DG <sub>HP</sub> | Os014383_01 | S3 | 0.000  | -1.017 | P | 550.750  | P | 500.304  | P | 1012.723 | LOC_Os09g15820.1 |
| DG <sub>HP</sub> | Os014449_01 | S3 | 0.000  | 1.330  | P | 217.112  | P | 239.597  | P | 95.317   | LOC_Os12g26480.2 |
| DG <sub>HP</sub> | Os014631_01 | S3 | 0.000  | 1.392  | P | 199.340  | P | 267.491  | P | 101.932  | -                |
| DG <sub>HP</sub> | Os014662_01 | S3 | 0.000  | 1.940  | P | 382.515  | P | 395.226  | P | 102.985  | LOC_Os03g17580.1 |
| DG <sub>HP</sub> | Os014668_01 | S3 | -1.461 | 0.000  | P | 337.094  | P | 122.454  | P | 103.675  | LOC_Os05g32720.1 |
| DG <sub>HP</sub> | Os014701_01 | S3 | 0.000  | 1.421  | P | 3913.837 | P | 3915.257 | P | 1462.327 | -                |
| DG <sub>HP</sub> | Os014758_01 | S3 | 0.000  | 1.417  | P | 879.076  | P | 545.018  | P | 204.167  | LOC_Os01g13120.1 |
| DG <sub>HP</sub> | Os014805_01 | S3 | -1.282 | 0.000  | P | 464.641  | P | 191.055  | P | 179.421  | LOC_Os02g57750.1 |
| DG <sub>HP</sub> | Os014883_01 | S3 | 1.151  | 0.000  | P | 2071.267 | P | 4600.193 | P | 5094.570 | LOC_Os06g44500.1 |
| DG <sub>HP</sub> | Os014891_01 | S3 | 0.000  | 1.607  | P | 766.957  | P | 588.228  | P | 193.110  | LOC_Os03g01190.1 |
| DG <sub>HP</sub> | Os014900_01 | S3 | 1.368  | 0.000  | P | 439.983  | P | 1135.581 | P | 1183.206 | LOC_Os04g40700.3 |
| DG <sub>HP</sub> | Os015043_01 | S3 | 0.000  | 1.314  | P | 279.321  | P | 351.887  | P | 141.507  | LOC_Os11g45220.1 |
| DG <sub>HP</sub> | Os015046_01 | S3 | 1.170  | 0.000  | P | 627.711  | P | 1412.221 | P | 2104.391 | LOC_Os03g29190.2 |
| DG <sub>HP</sub> | Os015062_01 | S3 | 0.000  | 1.421  | P | 683.390  | P | 542.724  | P | 202.618  | LOC_Os07g28480.1 |
| DG <sub>HP</sub> | Os015064_01 | S3 | 0.000  | 1.417  | P | 886.731  | P | 721.296  | P | 270.179  | LOC_Os02g40010.2 |
| DG <sub>HP</sub> | Os015137_01 | S3 | 1.287  | 0.000  | P | 503.470  | P | 1228.323 | P | 1674.580 | LOC_Os03g62410.1 |
| DG <sub>HP</sub> | Os015144_01 | S3 | 1.307  | 0.000  | P | 1489.034 | P | 3683.334 | P | 5588.194 | LOC_Os03g26650.2 |
| DG <sub>HP</sub> | Os015150_01 | S3 | 0.000  | 2.631  | P | 4264.757 | P | 3832.398 | P | 618.723  | LOC_Os06g41010.4 |
| DG <sub>HP</sub> | Os015155_01 | S3 | -1.516 | 0.000  | P | 600.648  | P | 210.063  | P | 230.925  | LOC_Os01g71590.3 |
| DG <sub>HP</sub> | Os015278_01 | S3 | 0.000  | -1.048 | P | 313.135  | P | 192.369  | P | 397.766  | LOC_Os09g35770.1 |
| DG <sub>HP</sub> | Os015370_01 | S3 | 0.000  | 1.326  | P | 190.920  | P | 341.574  | P | 136.238  | LOC_Os04g24180.2 |
| DG <sub>HP</sub> | Os015391_01 | S3 | 0.000  | 1.645  | P | 679.528  | P | 489.141  | P | 156.437  | LOC_Os09g07900.1 |
| DG <sub>HP</sub> | Os015461_01 | S3 | 0.000  | 1.540  | P | 308.199  | P | 357.722  | P | 122.986  | LOC_Os11g06420.1 |
| DG <sub>HP</sub> | Os015489_01 | S3 | -0.970 | 0.000  | P | 413.187  | P | 210.890  | P | 172.839  | -                |
| DG <sub>HP</sub> | Os015562_01 | S3 | 0.000  | 1.425  | P | 539.729  | P | 503.215  | P | 187.348  | LOC_Os12g05730.1 |
| DG <sub>HP</sub> | Os015572_01 | S3 | -1.022 | 0.000  | P | 359.425  | P | 176.959  | P | 242.083  | LOC_Os02g49570.1 |
| DG <sub>HP</sub> | Os015576_01 | S3 | 0.000  | 1.276  | P | 259.536  | P | 354.824  | P | 146.569  | LOC_Os12g18200.1 |
| DG <sub>HP</sub> | Os015579_01 | S3 | 0.000  | 1.735  | P | 684.500  | P | 390.179  | P | 117.201  | LOC_Os10g21000.1 |

|                  |             |    |        |        |   |          |   |           |   |           |                  |
|------------------|-------------|----|--------|--------|---|----------|---|-----------|---|-----------|------------------|
| DG <sub>HP</sub> | Os015593_01 | S3 | -1.199 | 1.545  | P | 1205.289 | P | 525.160   | P | 179.917   | LOC_Os08g26870.3 |
| DG <sub>HP</sub> | Os015605_01 | S3 | 1.825  | 0.000  | P | 1241.729 | P | 4399.699  | P | 6279.142  | LOC_Os03g05620.1 |
| DG <sub>HP</sub> | Os015656_01 | S3 | 0.000  | 1.338  | P | 504.613  | P | 343.728   | P | 135.923   | LOC_Os07g41280.3 |
| DG <sub>HP</sub> | Os015682_01 | S3 | 1.298  | 0.000  | P | 7398.723 | P | 18187.326 | P | 24502.503 | LOC_Os01g18744.1 |
| DG <sub>HP</sub> | Os015744_01 | S3 | -0.918 | 2.369  | P | 2994.249 | P | 1584.699  | P | 306.745   | LOC_Os04g54790.1 |
| DG <sub>HP</sub> | Os015762_01 | S3 | 0.000  | 1.455  | P | 937.562  | P | 734.467   | P | 267.886   | LOC_Os03g47740.1 |
| DG <sub>HP</sub> | Os015839_01 | S3 | 0.000  | 1.745  | P | 1320.408 | P | 1184.921  | P | 353.454   | LOC_Os02g35180.1 |
| DG <sub>HP</sub> | Os015940_01 | S3 | 1.105  | -0.973 | P | 180.965  | P | 389.384   | P | 764.116   | LOC_Os07g28920.1 |
| DG <sub>HP</sub> | Os015971_01 | S3 | -0.999 | 0.000  | P | 408.451  | P | 204.322   | P | 128.548   | LOC_Os03g29170.1 |
| DG <sub>HP</sub> | Os016026_01 | S3 | 1.465  | 0.000  | P | 216.200  | P | 597.013   | P | 815.086   | LOC_Os08g39970.1 |
| DG <sub>HP</sub> | Os016165_01 | S3 | 0.000  | 1.400  | P | 808.764  | P | 753.172   | P | 285.494   | LOC_Os04g50216.1 |
| DG <sub>HP</sub> | Os016168_01 | S3 | 1.480  | 0.000  | P | 1598.914 | P | 4459.389  | P | 6138.704  | LOC_Os02g39930.1 |
| DG <sub>HP</sub> | Os016171_01 | S3 | 1.135  | 0.000  | P | 230.648  | P | 506.631   | P | 364.393   | LOC_Os12g37870.1 |
| DG <sub>HP</sub> | Os016176_01 | S3 | -0.944 | 0.000  | P | 331.784  | P | 172.486   | P | 148.457   | LOC_Os12g18860.1 |
| DG <sub>HP</sub> | Os016181_01 | S3 | 0.000  | 1.653  | P | 305.549  | P | 302.335   | P | 96.159    | LOC_Os09g32430.1 |
| DG <sub>HP</sub> | Os016187_01 | S3 | 0.000  | 1.366  | P | 291.791  | P | 319.404   | P | 123.896   | LOC_Os04g42670.1 |
| DG <sub>HP</sub> | Os016188_01 | S3 | 0.000  | 1.374  | P | 318.039  | P | 292.846   | P | 113.012   | LOC_Os01g66420.1 |
| DG <sub>HP</sub> | Os016235_01 | S3 | 0.000  | 1.427  | P | 578.407  | P | 429.578   | P | 159.759   | LOC_Os02g58150.2 |
| DG <sub>HP</sub> | Os016284_01 | S3 | 0.000  | 1.557  | P | 2114.060 | P | 1427.512  | P | 485.115   | LOC_Os05g34650.1 |
| DG <sub>HP</sub> | Os016404_01 | S3 | 1.771  | -1.188 | P | 239.295  | P | 816.489   | P | 1859.832  | LOC_Os01g15610.1 |
| DG <sub>HP</sub> | Os016433_01 | S3 | 1.169  | 0.000  | P | 185.591  | P | 417.320   | P | 625.995   | LOC_Os04g15920.1 |
| DG <sub>HP</sub> | Os016468_01 | S3 | 0.000  | 1.284  | P | 144.608  | P | 184.331   | P | 75.685    | LOC_Os11g08909.1 |
| DG <sub>HP</sub> | Os016499_01 | S3 | 1.336  | 0.000  | P | 617.961  | P | 1559.524  | P | 2184.479  | LOC_Os09g11370.1 |
| DG <sub>HP</sub> | Os016512_01 | S3 | 0.000  | 1.458  | P | 503.051  | P | 300.840   | P | 109.471   | LOC_Os03g29760.2 |
| DG <sub>HP</sub> | Os016558_01 | S3 | 0.000  | 1.966  | P | 420.125  | P | 426.642   | P | 109.229   | LOC_Os03g57500.1 |
| DG <sub>HP</sub> | Os016565_01 | S3 | 0.000  | 1.688  | P | 404.664  | P | 419.101   | P | 130.043   | LOC_Os07g38580.1 |
| DG <sub>HP</sub> | Os016594_01 | S3 | 1.592  | 0.000  | P | 1968.038 | P | 5934.825  | P | 7875.318  | LOC_Os07g49100.1 |
| DG <sub>HP</sub> | Os016601_01 | S3 | 0.000  | -1.230 | P | 298.914  | P | 173.598   | P | 407.223   | LOC_Os09g15480.1 |
| DG <sub>HP</sub> | Os016612_01 | S3 | 0.000  | 1.684  | P | 761.655  | P | 614.324   | P | 191.193   | LOC_Os07g09150.1 |
| DG <sub>HP</sub> | Os016770_01 | S3 | 0.000  | 2.118  | P | 1071.040 | P | 1133.782  | P | 261.170   | LOC_Os07g30760.2 |
| DG <sub>HP</sub> | Os016774_01 | S3 | 0.000  | 1.332  | P | 244.144  | P | 237.620   | P | 94.404    | LOC_Os02g16450.1 |

|                  |             |    |        |        |   |          |   |          |   |          |                  |
|------------------|-------------|----|--------|--------|---|----------|---|----------|---|----------|------------------|
| DG <sub>HP</sub> | Os016789_01 | S3 | -1.021 | 0.000  | P | 950.066  | P | 468.193  | P | 365.552  | LOC_Os01g48300.4 |
| DG <sub>HP</sub> | Os016868_01 | S3 | 0.000  | 1.366  | P | 646.897  | P | 348.581  | P | 135.272  | LOC_Os01g51980.1 |
| DG <sub>HP</sub> | Os016869_01 | S3 | -1.184 | 0.000  | P | 4642.844 | P | 2042.861 | P | 1122.591 | LOC_Os01g08700.6 |
| DG <sub>HP</sub> | Os016870_01 | S3 | 0.000  | 1.857  | P | 608.466  | P | 790.224  | P | 218.139  | LOC_Os02g56280.1 |
| DG <sub>HP</sub> | Os016895_01 | S3 | 0.000  | 1.344  | P | 371.763  | P | 399.227  | P | 157.301  | -                |
| DG <sub>HP</sub> | Os016919_01 | S3 | 0.000  | 1.713  | P | 913.538  | P | 1372.703 | P | 418.638  | LOC_Os02g01590.1 |
| DG <sub>HP</sub> | Os016966_01 | S3 | 0.000  | 1.648  | P | 3042.902 | P | 1676.147 | P | 534.872  | LOC_Os04g32850.2 |
| DG <sub>HP</sub> | Os017110_01 | S3 | 0.000  | -1.233 | P | 379.021  | P | 531.358  | P | 1248.892 | LOC_Os05g39000.1 |
| DG <sub>HP</sub> | Os017295_01 | S3 | 0.000  | 1.525  | P | 1160.487 | P | 751.638  | P | 261.118  | LOC_Os03g17010.1 |
| DG <sub>HP</sub> | Os017305_01 | S3 | 0.000  | -1.129 | P | 192.276  | P | 375.727  | P | 822.015  | -                |
| DG <sub>HP</sub> | Os017342_01 | S3 | 0.000  | 1.518  | P | 306.367  | P | 306.874  | P | 107.135  | LOC_Os01g58580.1 |
| DG <sub>HP</sub> | Os017352_01 | S3 | 1.575  | 0.000  | P | 748.338  | P | 2228.962 | P | 2078.659 | -                |
| DG <sub>HP</sub> | Os017408_01 | S3 | -1.076 | 0.000  | P | 286.182  | P | 135.738  | P | 162.173  | LOC_Os09g12550.1 |
| DG <sub>HP</sub> | Os017413_01 | S3 | 0.000  | 1.447  | P | 426.276  | P | 347.169  | P | 127.349  | LOC_Os01g35580.3 |
| DG <sub>HP</sub> | Os017421_01 | S3 | 0.000  | 1.670  | P | 1785.341 | P | 1093.144 | P | 343.445  | LOC_Os02g44590.1 |
| DG <sub>HP</sub> | Os017533_01 | S3 | 1.510  | 0.000  | P | 379.617  | P | 1080.884 | P | 1311.390 | -                |
| DG <sub>HP</sub> | Os017639_01 | S3 | 0.000  | 1.571  | P | 1282.459 | P | 945.650  | P | 318.327  | LOC_Os02g28980.1 |
| DG <sub>HP</sub> | Os017662_01 | S3 | 0.000  | 1.594  | P | 913.520  | P | 546.760  | P | 181.127  | LOC_Os12g24080.1 |
| DG <sub>HP</sub> | Os017667_01 | S3 | 0.000  | 1.620  | P | 890.538  | P | 602.420  | P | 196.034  | LOC_Os06g15360.1 |
| DG <sub>HP</sub> | Os017686_01 | S3 | 0.000  | 1.516  | P | 962.656  | P | 1050.002 | P | 367.043  | LOC_Os04g48860.2 |
| DG <sub>HP</sub> | Os017780_01 | S3 | 0.000  | 1.415  | P | 666.004  | P | 481.707  | P | 180.639  | LOC_Os05g51180.1 |
| DG <sub>HP</sub> | Os017872_01 | S3 | -1.166 | 0.000  | P | 390.588  | P | 174.115  | P | 176.587  | LOC_Os04g12080.1 |
| DG <sub>HP</sub> | Os017967_01 | S3 | 1.406  | 0.000  | P | 768.206  | P | 2036.413 | P | 3388.500 | LOC_Os05g49880.1 |
| DG <sub>HP</sub> | Os017981_01 | S3 | -1.119 | 10.000 | P | 287.542  | P | 132.387  | A | 82.994   | LOC_Os09g17680.1 |
| DG <sub>HP</sub> | Os018018_01 | S3 | 0.000  | 1.268  | P | 217.197  | P | 231.642  | P | 96.184   | LOC_Os03g44210.2 |
| DG <sub>HP</sub> | Os018037_01 | S3 | 0.000  | 1.913  | P | 1247.442 | P | 787.481  | P | 209.083  | LOC_Os02g43790.1 |
| DG <sub>HP</sub> | Os018042_01 | S3 | 0.000  | 1.614  | P | 586.707  | P | 859.135  | P | 280.741  | LOC_Os02g42940.1 |
| DG <sub>HP</sub> | Os018049_01 | S3 | 2.057  | 0.000  | P | 485.646  | P | 2021.257 | P | 2915.641 | LOC_Os03g49630.1 |
| DG <sub>HP</sub> | Os018050_01 | S3 | -0.969 | 0.000  | P | 400.700  | P | 204.738  | P | 200.062  | LOC_Os01g68750.1 |
| DG <sub>HP</sub> | Os018061_01 | S3 | 1.114  | 0.000  | P | 153.415  | P | 332.035  | P | 355.418  | LOC_Os03g15120.1 |
| DG <sub>HP</sub> | Os018086_01 | S3 | 0.000  | 1.609  | P | 1178.070 | P | 761.049  | P | 249.483  | -                |



|                  |             |    |        |        |   |          |   |          |   |          |                  |
|------------------|-------------|----|--------|--------|---|----------|---|----------|---|----------|------------------|
| DG <sub>HP</sub> | Os018107_01 | S3 | 0.000  | 1.393  | P | 416.922  | P | 385.379  | P | 146.765  | LOC_Os02g45344.1 |
| DG <sub>HP</sub> | Os018131_01 | S3 | 0.000  | 1.293  | P | 351.429  | P | 394.493  | P | 160.986  | LOC_Os12g42140.1 |
| DG <sub>HP</sub> | Os018264_01 | S3 | 0.000  | -1.004 | P | 500.355  | P | 929.792  | P | 1865.059 | LOC_Os08g41320.1 |
| DG <sub>HP</sub> | Os018279_01 | S3 | 1.455  | 0.000  | P | 1078.117 | P | 2955.798 | P | 4392.454 | LOC_Os09g04790.1 |
| DG <sub>HP</sub> | Os018345_01 | S3 | 1.108  | 0.000  | P | 211.355  | P | 455.509  | P | 492.520  | LOC_Os12g34860.1 |
| DG <sub>HP</sub> | Os018378_01 | S3 | 2.308  | 0.000  | P | 872.336  | P | 4318.976 | P | 6248.325 | LOC_Os08g02210.2 |
| DG <sub>HP</sub> | Os018397_01 | S3 | -1.165 | 0.000  | P | 877.969  | P | 391.507  | P | 288.961  | LOC_Os08g04450.4 |
| DG <sub>HP</sub> | Os018427_01 | S3 | -1.281 | 0.000  | P | 460.861  | P | 189.649  | P | 212.176  | LOC_Os08g34950.1 |
| DG <sub>HP</sub> | Os018432_01 | S3 | 1.126  | 0.000  | P | 258.627  | P | 564.372  | P | 613.930  | LOC_Os08g42420.5 |
| DG <sub>HP</sub> | Os018512_01 | S3 | 0.000  | 1.540  | P | 304.853  | P | 331.761  | P | 114.073  | LOC_Os01g65210.1 |
| DG <sub>HP</sub> | Os018514_01 | S3 | 0.000  | 1.372  | P | 305.601  | P | 280.680  | P | 108.468  | LOC_Os09g21000.1 |
| DG <sub>HP</sub> | Os018621_01 | S3 | 1.163  | 0.000  | P | 617.342  | P | 1382.089 | P | 1864.478 | LOC_Os09g29980.2 |
| DG <sub>HP</sub> | Os018705_01 | S3 | -1.041 | 0.000  | P | 376.306  | P | 182.866  | P | 148.444  | LOC_Os04g49960.1 |
| DG <sub>HP</sub> | Os018744_01 | S3 | 0.000  | 1.289  | P | 713.989  | P | 595.408  | P | 243.714  | LOC_Os08g39630.1 |
| DG <sub>HP</sub> | Os018766_01 | S3 | 0.000  | 1.292  | P | 1308.014 | P | 905.827  | P | 369.869  | LOC_Os04g40670.1 |
| DG <sub>HP</sub> | Os018767_01 | S3 | 0.000  | 2.154  | P | 980.788  | P | 889.183  | P | 199.806  | LOC_Os04g32050.1 |
| DG <sub>HP</sub> | Os018818_01 | S3 | -0.969 | 1.395  | P | 2661.653 | P | 1359.475 | P | 516.769  | -                |
| DG <sub>HP</sub> | Os018837_01 | S3 | -0.928 | 0.000  | P | 693.069  | P | 364.326  | P | 333.290  | LOC_Os01g61880.1 |
| DG <sub>HP</sub> | Os018865_01 | S3 | 0.000  | 1.277  | P | 768.007  | P | 779.162  | P | 321.452  | -                |
| DG <sub>HP</sub> | Os018882_01 | S3 | 0.000  | 1.506  | P | 1832.048 | P | 1161.112 | P | 408.828  | LOC_Os03g27790.1 |
| DG <sub>HP</sub> | Os018906_01 | S3 | 0.000  | 1.890  | P | 472.619  | P | 425.597  | P | 114.865  | LOC_Os07g31450.1 |
| DG <sub>HP</sub> | Os019071_01 | S3 | -0.957 | 0.000  | P | 697.579  | P | 359.413  | P | 256.277  | LOC_Os02g38840.2 |
| DG <sub>HP</sub> | Os019113_01 | S3 | -0.951 | 0.000  | P | 1470.931 | P | 760.620  | P | 400.718  | LOC_Os12g17910.1 |
| DG <sub>HP</sub> | Os019114_01 | S3 | 0.000  | 1.599  | P | 332.873  | P | 288.238  | P | 95.118   | LOC_Os04g49000.1 |
| DG <sub>HP</sub> | Os019144_01 | S3 | 0.000  | 1.886  | P | 410.754  | P | 542.964  | P | 146.921  | LOC_Os07g10600.2 |
| DG <sub>HP</sub> | Os019163_01 | S3 | 0.000  | 1.391  | P | 2066.703 | P | 2101.201 | P | 801.138  | LOC_Os01g08560.2 |
| DG <sub>HP</sub> | Os019255_01 | S3 | 0.000  | 1.586  | P | 269.568  | P | 278.611  | P | 92.775   | LOC_Os05g11810.1 |
| DG <sub>HP</sub> | Os019258_01 | S3 | 0.000  | 1.359  | P | 201.026  | P | 289.990  | P | 113.018  | LOC_Os03g46190.2 |
| DG <sub>HP</sub> | Os019296_01 | S3 | 0.000  | -1.084 | P | 298.241  | P | 290.668  | P | 616.184  | LOC_Os04g49210.1 |
| DG <sub>HP</sub> | Os019328_01 | S3 | -0.926 | 0.000  | P | 310.124  | P | 163.209  | P | 147.418  | -                |
| DG <sub>HP</sub> | Os019437_01 | S3 | 0.000  | -1.648 | P | 253.831  | P | 216.298  | P | 677.668  | LOC_Os12g42260.2 |

|                  |             |    |        |        |   |          |   |          |   |          |                  |
|------------------|-------------|----|--------|--------|---|----------|---|----------|---|----------|------------------|
| DG <sub>HP</sub> | Os019546_01 | S3 | 0.000  | 1.664  | P | 321.434  | P | 373.151  | P | 117.733  | LOC_Os01g53000.1 |
| DG <sub>HP</sub> | Os019634_01 | S3 | -1.023 | 0.000  | P | 1896.826 | P | 933.593  | P | 544.904  | LOC_Os06g02380.2 |
| DG <sub>HP</sub> | Os019923_01 | S3 | 0.000  | 1.307  | P | 245.210  | P | 300.469  | P | 121.435  | LOC_Os01g51890.1 |
| DG <sub>HP</sub> | Os019943_01 | S3 | 0.000  | 1.329  | P | 521.666  | P | 606.602  | P | 241.427  | LOC_Os07g27490.1 |
| DG <sub>HP</sub> | Os019988_01 | S3 | 0.000  | 1.334  | P | 202.637  | P | 191.673  | P | 76.012   | LOC_Os07g37140.1 |
| DG <sub>HP</sub> | Os020042_01 | S3 | 0.000  | 1.480  | P | 422.895  | P | 510.944  | P | 183.141  | LOC_Os12g40550.1 |
| DG <sub>HP</sub> | Os020076_01 | S3 | 1.664  | 0.000  | P | 283.364  | P | 898.253  | P | 1356.637 | LOC_Os08g39380.1 |
| DG <sub>HP</sub> | Os020133_01 | S3 | 1.366  | 0.000  | P | 643.267  | P | 1657.613 | P | 1878.664 | LOC_Os11g42030.1 |
| DG <sub>HP</sub> | Os020193_01 | S3 | 1.482  | 1.774  | P | 143.555  | P | 401.043  | P | 117.303  | LOC_Os07g44550.1 |
| DG <sub>HP</sub> | Os020254_01 | S3 | 0.000  | 1.508  | P | 444.568  | P | 389.975  | P | 137.086  | LOC_Os01g48330.1 |
| DG <sub>HP</sub> | Os020277_01 | S3 | 0.000  | 1.484  | P | 351.476  | P | 298.522  | P | 106.706  | LOC_Os02g47860.2 |
| DG <sub>HP</sub> | Os020302_01 | S3 | 0.000  | 1.308  | P | 862.278  | P | 703.450  | P | 284.072  | LOC_Os02g57180.1 |
| DG <sub>HP</sub> | Os020331_01 | S3 | 1.813  | 0.000  | P | 598.049  | P | 2100.952 | P | 3458.889 | LOC_Os03g40650.1 |
| DG <sub>HP</sub> | Os020343_01 | S3 | 0.000  | 1.387  | P | 353.664  | P | 316.371  | P | 120.972  | LOC_Os11g16410.1 |
| DG <sub>HP</sub> | Os020347_01 | S3 | 0.000  | 1.371  | P | 239.135  | P | 295.705  | P | 114.359  | LOC_Os07g45350.3 |
| DG <sub>HP</sub> | Os020349_01 | S3 | 0.000  | 1.493  | P | 247.978  | P | 260.203  | P | 92.453   | LOC_Os03g10400.3 |
| DG <sub>HP</sub> | Os020367_01 | S3 | 0.000  | 1.565  | P | 526.355  | P | 515.422  | P | 174.152  | LOC_Os01g15630.1 |
| DG <sub>HP</sub> | Os020369_01 | S3 | 0.000  | 1.346  | P | 354.627  | P | 323.770  | P | 127.397  | LOC_Os03g46340.1 |
| DG <sub>HP</sub> | Os020390_01 | S3 | 0.000  | 1.969  | P | 1225.048 | P | 930.502  | P | 237.675  | LOC_Os03g58070.1 |
| DG <sub>HP</sub> | Os020397_01 | S3 | 0.000  | 2.424  | P | 299.579  | P | 525.393  | P | 97.908   | LOC_Os01g09640.1 |
| DG <sub>HP</sub> | Os020402_01 | S3 | -0.941 | 0.000  | P | 296.827  | P | 154.622  | P | 143.150  | LOC_Os02g23890.1 |
| DG <sub>HP</sub> | Os020538_01 | S3 | -1.204 | 10.000 | P | 355.007  | P | 154.092  | A | 92.235   | -                |
| DG <sub>HP</sub> | Os020634_01 | S3 | 0.000  | 1.538  | P | 266.544  | P | 264.869  | P | 91.219   | LOC_Os02g50970.1 |
| DG <sub>HP</sub> | Os020653_01 | S3 | 0.000  | 1.292  | P | 455.435  | P | 826.713  | P | 337.721  | LOC_Os11g05990.1 |
| DG <sub>HP</sub> | Os020669_01 | S3 | 0.000  | 1.686  | P | 928.754  | P | 540.578  | P | 168.056  | LOC_Os03g16369.2 |
| DG <sub>HP</sub> | Os020680_01 | S3 | 0.000  | 1.629  | P | 223.637  | P | 306.348  | P | 99.028   | LOC_Os01g65986.1 |
| DG <sub>HP</sub> | Os020705_01 | S3 | 0.000  | 1.447  | P | 666.468  | P | 577.416  | P | 211.800  | LOC_Os01g34670.1 |
| DG <sub>HP</sub> | Os021034_01 | S3 | 0.000  | 1.399  | P | 258.730  | P | 271.702  | P | 103.022  | LOC_Os01g17279.1 |
| DG <sub>HP</sub> | Os021036_01 | S3 | 0.000  | 1.950  | P | 574.502  | P | 589.368  | P | 152.522  | LOC_Os01g23620.1 |
| DG <sub>HP</sub> | Os021077_01 | S3 | 0.000  | 1.745  | P | 448.475  | P | 301.629  | P | 89.969   | LOC_Os07g12830.2 |
| DG <sub>HP</sub> | Os021078_01 | S3 | 0.000  | 1.482  | P | 442.465  | P | 384.824  | P | 137.771  | LOC_Os03g57940.3 |

|                  |             |    |        |        |   |          |   |          |   |          |                  |
|------------------|-------------|----|--------|--------|---|----------|---|----------|---|----------|------------------|
| DG <sub>HP</sub> | Os021124_01 | S3 | 0.000  | 1.461  | P | 399.925  | P | 250.550  | P | 90.993   | LOC_Os02g57590.1 |
| DG <sub>HP</sub> | Os021147_01 | S3 | 1.169  | 0.000  | P | 170.102  | P | 382.578  | P | 247.391  | LOC_Os08g35860.1 |
| DG <sub>HP</sub> | Os021178_01 | S3 | 0.000  | 1.692  | P | 425.126  | P | 423.602  | P | 131.131  | LOC_Os04g56646.1 |
| DG <sub>HP</sub> | Os021319_01 | S3 | -1.215 | 0.000  | P | 1221.772 | P | 526.232  | P | 335.701  | LOC_Os05g41010.1 |
| DG <sub>HP</sub> | Os021389_01 | S3 | 0.000  | 2.196  | P | 561.153  | P | 552.882  | P | 120.696  | LOC_Os03g60820.1 |
| DG <sub>HP</sub> | Os021413_01 | S3 | 0.000  | 1.571  | P | 537.101  | P | 460.362  | P | 154.898  | LOC_Os08g25799.1 |
| DG <sub>HP</sub> | Os021431_01 | S3 | 0.000  | 1.590  | P | 393.573  | P | 463.245  | P | 153.919  | LOC_Os01g51380.2 |
| DG <sub>HP</sub> | Os021453_01 | S3 | 0.000  | 1.680  | P | 1541.329 | P | 1218.015 | P | 380.012  | LOC_Os02g12760.1 |
| DG <sub>HP</sub> | Os021454_01 | S3 | 0.000  | 2.008  | P | 1805.721 | P | 1388.511 | P | 345.223  | LOC_Os03g37970.1 |
| DG <sub>HP</sub> | Os021455_01 | S3 | 0.000  | 1.792  | P | 1740.024 | P | 1938.517 | P | 559.956  | LOC_Os03g55820.1 |
| DG <sub>HP</sub> | Os021458_01 | S3 | 0.000  | 1.275  | P | 1417.909 | P | 1228.284 | P | 507.505  | LOC_Os07g14270.1 |
| DG <sub>HP</sub> | Os021485_01 | S3 | 0.000  | 1.696  | P | 414.913  | P | 299.311  | P | 92.370   | LOC_Os06g50818.1 |
| DG <sub>HP</sub> | Os021505_01 | S3 | 0.000  | -1.033 | P | 1237.341 | P | 1989.465 | P | 4070.396 | LOC_Os02g51930.1 |
| DG <sub>HP</sub> | Os021532_01 | S3 | 0.000  | 1.656  | P | 341.794  | P | 304.769  | P | 96.681   | LOC_Os11g34230.1 |
| DG <sub>HP</sub> | Os021549_01 | S3 | 0.000  | 1.663  | P | 1206.584 | P | 904.113  | P | 285.456  | LOC_Os02g58560.1 |
| DG <sub>HP</sub> | Os021555_01 | S3 | 0.000  | 1.817  | P | 275.933  | P | 374.743  | P | 106.341  | LOC_Os05g04530.1 |
| DG <sub>HP</sub> | Os021590_01 | S3 | 1.179  | 0.000  | P | 1749.266 | P | 3960.900 | P | 5205.467 | LOC_Os06g35560.1 |
| DG <sub>HP</sub> | Os021606_01 | S3 | 1.430  | 0.000  | P | 537.466  | P | 1448.415 | P | 2091.623 | LOC_Os09g21470.1 |
| DG <sub>HP</sub> | Os021857_01 | S3 | 0.000  | 1.786  | P | 1550.246 | P | 1760.587 | P | 510.351  | LOC_Os10g41200.1 |
| DG <sub>HP</sub> | Os021893_01 | S3 | -1.563 | 0.000  | P | 1514.079 | P | 512.504  | P | 306.291  | LOC_Os09g35030.1 |
| DG <sub>HP</sub> | Os021904_01 | S3 | 0.000  | 1.400  | P | 1103.285 | P | 1013.338 | P | 383.949  | LOC_Os02g54980.1 |
| DG <sub>HP</sub> | Os021927_01 | S3 | -0.925 | 0.000  | P | 659.237  | P | 347.223  | P | 256.033  | LOC_Os05g32820.1 |
| DG <sub>HP</sub> | Os022155_01 | S3 | 0.000  | 1.447  | P | 388.725  | P | 315.572  | P | 115.753  | LOC_Os04g58020.1 |
| DG <sub>HP</sub> | Os022268_01 | S3 | 0.000  | -1.301 | P | 211.495  | P | 231.463  | P | 570.361  | LOC_Os04g45460.1 |
| DG <sub>HP</sub> | Os022572_01 | S3 | 0.000  | -1.280 | P | 2345.467 | P | 3387.188 | P | 8225.550 | LOC_Os12g36980.1 |
| DG <sub>HP</sub> | Os022683_01 | S3 | 0.000  | -0.966 | P | 367.259  | P | 385.941  | P | 754.072  | LOC_Os01g18870.1 |
| DG <sub>HP</sub> | Os022954_01 | S3 | 0.000  | 1.708  | P | 584.996  | P | 538.472  | P | 164.783  | LOC_Os08g34170.1 |
| DG <sub>HP</sub> | Os023050_01 | S3 | 0.000  | 1.346  | P | 1445.397 | P | 1046.384 | P | 411.654  | LOC_Os06g02330.1 |
| DG <sub>HP</sub> | Os023116_01 | S3 | 2.079  | 1.723  | P | 92.327   | P | 390.083  | P | 118.137  | -                |
| DG <sub>HP</sub> | Os023212_01 | S3 | -0.918 | 10.000 | P | 438.436  | P | 231.966  | A | 58.238   | -                |
| DG <sub>HP</sub> | Os023497_01 | S3 | 0.000  | -1.268 | P | 446.802  | P | 331.739  | P | 799.121  | -                |

|                  |             |    |        |        |   |          |   |          |   |          |                  |
|------------------|-------------|----|--------|--------|---|----------|---|----------|---|----------|------------------|
| DG <sub>HP</sub> | Os023653_01 | S3 | 0.000  | 1.285  | P | 1829.397 | P | 1345.983 | P | 552.207  | LOC_Os05g43140.1 |
| DG <sub>HP</sub> | Os023778_01 | S3 | 0.000  | -1.198 | P | 236.787  | P | 365.389  | P | 838.562  | LOC_Os01g63010.1 |
| DG <sub>HP</sub> | Os023977_01 | S3 | 0.000  | 1.987  | P | 403.150  | P | 410.183  | P | 103.477  | LOC_Os06g43790.1 |
| DG <sub>HP</sub> | Os023998_01 | S3 | 0.000  | 1.530  | P | 855.774  | P | 784.937  | P | 271.803  | LOC_Os08g42570.1 |
| DG <sub>HP</sub> | Os024046_01 | S3 | -0.919 | 0.000  | P | 492.759  | P | 260.637  | P | 174.622  | LOC_Os02g44010.1 |
| DG <sub>HP</sub> | Os024099_01 | S3 | -1.786 | 0.000  | P | 797.622  | P | 231.334  | P | 401.753  | LOC_Os01g51690.1 |
| DG <sub>HP</sub> | Os024371_01 | S3 | 1.862  | 0.000  | P | 335.220  | P | 1218.430 | P | 2025.861 | -                |
| DG <sub>HP</sub> | Os024723_01 | S3 | 0.000  | 1.434  | P | 843.648  | P | 597.597  | P | 221.173  | LOC_Os11g05490.1 |
| DG <sub>HP</sub> | Os024766_01 | S3 | 0.000  | 1.865  | P | 1010.402 | P | 886.520  | P | 243.422  | LOC_Os03g64360.1 |
| DG <sub>HP</sub> | Os024793_01 | S3 | 0.000  | 1.372  | P | 407.593  | P | 292.204  | P | 112.879  | LOC_Os01g63190.1 |
| DG <sub>HP</sub> | Os024827_01 | S3 | 0.000  | 1.654  | P | 217.536  | P | 281.583  | P | 89.447   | -                |
| DG <sub>HP</sub> | Os025124_01 | S3 | 0.000  | 1.498  | P | 742.272  | P | 863.681  | P | 305.802  | LOC_Os08g30730.1 |
| DG <sub>HP</sub> | Os025146_01 | S3 | 0.000  | 1.570  | P | 265.313  | P | 288.093  | P | 97.035   | LOC_Os06g08580.1 |
| DG <sub>HP</sub> | Os025187_01 | S3 | 1.161  | 0.000  | P | 218.397  | P | 488.437  | P | 757.439  | -                |
| DG <sub>HP</sub> | Os025398_01 | S3 | 1.131  | 0.000  | P | 588.517  | P | 1289.024 | P | 1970.133 | LOC_Os05g45410.1 |
| DG <sub>HP</sub> | Os025567_01 | S3 | 0.000  | 1.490  | P | 629.206  | P | 524.855  | P | 186.844  | LOC_Os11g28270.3 |
| DG <sub>HP</sub> | Os025816_01 | S3 | 1.815  | 0.000  | P | 164.522  | P | 578.780  | P | 850.244  | LOC_Os07g14610.1 |
| DG <sub>HP</sub> | Os025868_01 | S3 | 1.137  | 0.000  | P | 161.711  | P | 355.731  | P | 284.031  | LOC_Os03g02830.1 |
| DG <sub>HP</sub> | Os025874_01 | S3 | 0.000  | 1.445  | P | 634.858  | P | 643.711  | P | 236.439  | LOC_Os02g53490.1 |
| DG <sub>HP</sub> | Os025882_01 | S3 | -1.150 | 0.000  | P | 810.151  | P | 364.962  | P | 271.200  | LOC_Os01g20830.1 |
| DG <sub>HP</sub> | Os025897_01 | S3 | 0.000  | 1.398  | P | 1443.580 | P | 1124.570 | P | 426.637  | LOC_Os05g31062.1 |
| DG <sub>HP</sub> | Os025904_01 | S3 | 0.000  | 2.082  | P | 359.811  | P | 457.387  | P | 108.014  | LOC_Os01g49210.1 |
| DG <sub>HP</sub> | Os025974_01 | S3 | 0.000  | 1.691  | P | 585.697  | P | 380.722  | P | 117.936  | LOC_Os03g53060.1 |
| DG <sub>HP</sub> | Os026022_01 | S3 | 0.000  | -1.196 | P | 448.663  | P | 455.647  | P | 1043.546 | LOC_Os10g28420.1 |
| DG <sub>HP</sub> | Os026372_01 | S3 | 0.000  | 1.288  | P | 368.475  | P | 335.269  | P | 137.320  | LOC_Os05g27530.1 |
| DG <sub>HP</sub> | Os026390_01 | S3 | 1.264  | -1.014 | P | 153.555  | P | 368.750  | P | 744.657  | LOC_Os05g25040.2 |
| DG <sub>HP</sub> | Os026464_01 | S3 | 1.215  | -1.136 | P | 377.385  | P | 876.366  | P | 1925.812 | LOC_Os09g34100.1 |
| DG <sub>HP</sub> | Os026917_01 | S3 | -1.071 | -1.078 | P | 9226.499 | P | 4392.807 | P | 9274.304 | LOC_Os04g52250.1 |
| DG <sub>HP</sub> | Os027607_01 | S3 | 1.280  | 0.000  | P | 101.479  | P | 246.446  | P | 262.136  | LOC_Os02g07830.1 |
| DG <sub>HP</sub> | Os027785_01 | S3 | 1.414  | 0.000  | P | 382.660  | P | 1019.871 | P | 1831.553 | LOC_Os03g61130.1 |
| DG <sub>HP</sub> | Os027821_01 | S3 | -1.241 | 0.000  | P | 1046.934 | P | 443.068  | P | 330.292  | LOC_Os07g37730.1 |

|                  |             |    |        |        |   |          |   |          |   |          |                  |
|------------------|-------------|----|--------|--------|---|----------|---|----------|---|----------|------------------|
| DG <sub>HP</sub> | Os027934_01 | S3 | 1.157  | 0.000  | P | 114.216  | P | 254.641  | P | 363.919  | LOC_Os06g06270.1 |
| DG <sub>HP</sub> | Os028021_01 | S3 | -0.973 | 1.466  | P | 1626.494 | P | 828.704  | P | 299.946  | LOC_Os01g04670.1 |
| DG <sub>HP</sub> | Os028543_01 | S3 | 0.000  | 1.304  | P | 381.820  | P | 316.274  | P | 128.052  | LOC_Os03g47890.1 |
| DG <sub>HP</sub> | Os028605_01 | S3 | -1.905 | 0.000  | P | 3132.828 | P | 836.598  | P | 412.530  | LOC_Os02g06380.1 |
| DG <sub>HP</sub> | Os028616_01 | S3 | 1.366  | -0.989 | P | 193.347  | P | 498.500  | P | 989.692  | LOC_Os11g02440.2 |
| DG <sub>HP</sub> | Os028619_01 | S3 | 0.000  | 1.456  | P | 149.615  | P | 263.970  | P | 96.206   | LOC_Os11g14120.1 |
| DG <sub>HP</sub> | Os028782_01 | S3 | 0.000  | -1.121 | P | 301.193  | P | 390.371  | P | 849.155  | LOC_Os11g12810.1 |
| DG <sub>HP</sub> | Os028837_01 | S3 | -1.212 | 0.000  | P | 884.747  | P | 381.970  | P | 235.509  | LOC_Os12g04970.1 |
| DG <sub>HP</sub> | Os029050_01 | S3 | 1.181  | 0.000  | P | 240.585  | P | 545.662  | P | 465.495  | LOC_Os10g35260.1 |
| DG <sub>HP</sub> | Os029489_01 | S3 | 0.000  | -1.063 | P | 103.909  | P | 207.058  | P | 432.540  | LOC_Os02g57854.1 |
| DG <sub>HP</sub> | Os029577_01 | S3 | 1.195  | 0.000  | P | 340.718  | P | 780.084  | P | 977.208  | LOC_Os05g50340.1 |
| DG <sub>HP</sub> | Os029655_01 | S3 | 1.106  | 0.000  | P | 427.221  | P | 919.767  | P | 1063.056 | LOC_Os07g36220.1 |
| DG <sub>HP</sub> | Os029901_01 | S3 | 0.000  | -1.008 | P | 196.561  | P | 202.747  | P | 407.705  | LOC_Os05g02650.1 |
| DG <sub>HP</sub> | Os029934_01 | S3 | 1.518  | 0.000  | P | 168.647  | P | 482.918  | P | 540.086  | LOC_Os09g13410.1 |
| DG <sub>HP</sub> | Os029975_01 | S3 | 1.149  | 0.000  | P | 138.616  | P | 307.301  | P | 337.619  | -                |
| DG <sub>HP</sub> | Os030028_01 | S3 | 1.413  | 0.000  | P | 138.116  | P | 367.766  | P | 492.589  | LOC_Os01g02710.1 |
| DG <sub>HP</sub> | Os030080_01 | S3 | -1.561 | 0.000  | P | 1002.935 | P | 339.840  | P | 472.159  | LOC_Os03g45450.1 |
| DG <sub>HP</sub> | Os030108_01 | S3 | 1.319  | 0.000  | P | 509.388  | P | 1270.605 | P | 1708.554 | LOC_Os06g37400.1 |
| DG <sub>HP</sub> | Os030179_01 | S3 | 0.000  | -1.017 | P | 255.199  | P | 279.463  | P | 565.639  | LOC_Os01g54540.1 |
| DG <sub>HP</sub> | Os030344_01 | S3 | 1.786  | 0.000  | P | 163.078  | P | 562.420  | P | 674.268  | LOC_Os12g43820.1 |
| DG <sub>HP</sub> | Os030366_01 | S3 | 1.120  | 0.000  | P | 217.990  | P | 473.858  | P | 502.128  | LOC_Os04g41350.1 |
| DG <sub>HP</sub> | Os030442_01 | S3 | 1.132  | 0.000  | P | 1555.587 | P | 3409.830 | P | 3854.323 | LOC_Os06g10290.1 |
| DG <sub>HP</sub> | Os030484_01 | S3 | -1.095 | 0.000  | P | 2270.374 | P | 1062.683 | P | 1122.340 | -                |
| DG <sub>HP</sub> | Os030546_01 | S3 | 1.172  | 0.000  | P | 114.302  | P | 257.574  | P | 265.840  | LOC_Os09g16270.1 |
| DG <sub>HP</sub> | Os030649_01 | S3 | 0.000  | 1.494  | P | 479.963  | P | 272.419  | P | 96.743   | -                |
| DG <sub>HP</sub> | Os030652_01 | S3 | 0.000  | -1.012 | P | 196.414  | P | 281.163  | P | 566.895  | LOC_Os06g11940.1 |
| DG <sub>HP</sub> | Os030899_01 | S3 | 0.000  | 1.834  | P | 466.889  | P | 507.123  | P | 142.234  | LOC_Os04g53550.1 |
| DG <sub>HP</sub> | Os030946_01 | S3 | 0.000  | 1.259  | P | 1020.620 | P | 780.263  | P | 326.008  | LOC_Os09g26470.1 |
| DG <sub>HP</sub> | Os031177_01 | S3 | 1.762  | 0.000  | P | 158.940  | P | 538.920  | P | 355.137  | LOC_Os05g13490.1 |
| DG <sub>HP</sub> | Os031628_01 | S3 | 2.789  | 1.737  | P | 108.323  | P | 748.507  | P | 224.608  | LOC_Os09g37290.1 |
| DG <sub>HP</sub> | Os031701_01 | S3 | 0.000  | 1.337  | P | 935.865  | P | 532.163  | P | 210.715  | LOC_Os01g24690.1 |

|                  |             |    |        |        |   |          |   |          |   |          |                  |
|------------------|-------------|----|--------|--------|---|----------|---|----------|---|----------|------------------|
| DG <sub>HP</sub> | Os031725_01 | S3 | 0.000  | 1.597  | P | 435.989  | P | 429.308  | P | 141.946  | LOC_Os11g42640.1 |
| DG <sub>HP</sub> | Os031751_01 | S3 | 1.548  | 0.000  | P | 109.796  | P | 321.092  | P | 276.989  | -                |
| DG <sub>HP</sub> | Os031779_01 | S3 | -0.992 | 0.000  | P | 331.047  | P | 166.447  | P | 122.738  | -                |
| DG <sub>HP</sub> | Os031960_01 | S3 | 1.848  | 0.000  | P | 152.148  | P | 547.893  | P | 273.123  | LOC_Os11g28170.1 |
| DG <sub>HP</sub> | Os032029_01 | S3 | 1.452  | 0.000  | P | 95.327   | P | 260.741  | P | 280.172  | -                |
| DG <sub>HP</sub> | Os032136_01 | S3 | 0.000  | 1.755  | P | 395.777  | P | 413.575  | P | 122.559  | LOC_Os03g22634.1 |
| DG <sub>HP</sub> | Os032469_01 | S3 | 1.132  | 0.000  | P | 104.537  | P | 229.107  | P | 172.991  | LOC_Os03g49920.1 |
| DG <sub>HP</sub> | Os032573_01 | S3 | 1.252  | 10.000 | P | 241.854  | P | 576.076  | A | 269.604  | -                |
| DG <sub>HP</sub> | Os032695_01 | S3 | 1.273  | 0.000  | P | 112.340  | P | 271.421  | P | 339.779  | LOC_Os05g18870.1 |
| DG <sub>HP</sub> | Os032727_01 | S3 | 1.196  | 0.000  | P | 148.917  | P | 341.265  | P | 433.358  | LOC_Os08g04520.1 |
| DG <sub>HP</sub> | Os032793_01 | S3 | 0.000  | 1.672  | P | 511.457  | P | 500.199  | P | 156.970  | LOC_Os07g46190.1 |
| DG <sub>HP</sub> | Os032953_01 | S3 | 1.267  | 0.000  | P | 149.319  | P | 359.417  | P | 503.842  | LOC_Os01g35310.1 |
| DG <sub>HP</sub> | Os033046_01 | S3 | -1.131 | 0.000  | P | 418.396  | P | 191.032  | P | 236.721  | LOC_Os10g35330.1 |
| DG <sub>HP</sub> | Os033589_01 | S3 | 0.000  | 1.505  | P | 684.841  | P | 394.428  | P | 138.941  | LOC_Os08g25240.1 |
| DG <sub>HP</sub> | Os033643_01 | S3 | 0.000  | 1.261  | P | 430.070  | P | 421.954  | P | 176.090  | -                |
| DG <sub>HP</sub> | Os033886_01 | S3 | 1.299  | 0.000  | P | 170.628  | P | 419.771  | P | 346.813  | LOC_Os08g33300.1 |
| DG <sub>HP</sub> | Os033950_01 | S3 | -1.547 | 10.000 | P | 488.058  | P | 166.989  | A | 50.431   | -                |
| DG <sub>HP</sub> | Os034452_01 | S3 | 1.202  | 0.000  | P | 111.794  | P | 257.114  | P | 320.220  | LOC_Os09g02350.1 |
| DG <sub>HP</sub> | Os034470_01 | S3 | 1.461  | 0.000  | P | 107.661  | P | 296.301  | P | 508.256  | LOC_Os10g10420.1 |
| DG <sub>HP</sub> | Os034533_01 | S3 | 1.422  | 0.000  | P | 289.173  | P | 774.693  | P | 464.021  | LOC_Os05g12270.1 |
| DG <sub>HP</sub> | Os034680_01 | S3 | 0.000  | 1.759  | P | 378.277  | P | 290.554  | P | 85.848   | LOC_Os05g04914.1 |
| DG <sub>HP</sub> | Os034759_01 | S3 | 1.647  | 1.271  | P | 643.080  | P | 2014.373 | P | 834.596  | LOC_Os04g13090.1 |
| DG <sub>HP</sub> | Os034801_01 | S3 | 1.115  | 10.000 | P | 118.364  | P | 256.428  | A | 99.473   | LOC_Os09g24310.1 |
| DG <sub>HP</sub> | Os035048_01 | S3 | 1.261  | 0.000  | P | 119.794  | P | 287.072  | P | 371.367  | LOC_Os12g39220.1 |
| DG <sub>HP</sub> | Os035128_01 | S3 | 1.288  | 10.000 | P | 132.032  | P | 322.373  | A | 145.808  | LOC_Os05g46060.1 |
| DG <sub>HP</sub> | Os035785_01 | S3 | 0.000  | 1.371  | P | 499.492  | P | 351.937  | P | 136.103  | LOC_Os09g30050.1 |
| DG <sub>HP</sub> | Os035825_01 | S3 | -1.462 | 0.000  | P | 508.589  | P | 184.574  | P | 142.485  | -                |
| DG <sub>HP</sub> | Os035930_01 | S3 | 0.000  | -1.418 | P | 246.914  | P | 163.277  | P | 436.213  | LOC_Os04g31290.1 |
| DG <sub>HP</sub> | Os036777_01 | S3 | 0.000  | 2.419  | P | 887.543  | P | 582.230  | P | 108.870  | LOC_Os02g48920.1 |
| DG <sub>HP</sub> | Os037353_01 | S3 | 0.000  | 1.614  | P | 437.062  | P | 414.550  | P | 135.400  | -                |
| DG <sub>HP</sub> | Os037594_01 | S3 | 0.000  | -0.995 | P | 1469.707 | P | 1676.965 | P | 3342.911 | -                |

|                  |             |    |        |        |   |          |   |          |   |          |                  |
|------------------|-------------|----|--------|--------|---|----------|---|----------|---|----------|------------------|
| DG <sub>HP</sub> | Os037607_01 | S3 | -1.042 | 0.000  | P | 541.553  | P | 263.061  | P | 135.621  | LOC_Os01g02680.1 |
| DG <sub>HP</sub> | Os037666_01 | S3 | 1.241  | 0.000  | P | 109.165  | P | 258.064  | P | 288.806  | LOC_Os10g26400.2 |
| DG <sub>HP</sub> | Os037974_01 | S3 | 0.000  | -1.060 | P | 200.202  | P | 170.909  | P | 356.351  | LOC_Os02g13460.1 |
| DG <sub>HP</sub> | Os038937_01 | S3 | 1.322  | 0.000  | P | 235.984  | P | 589.926  | P | 685.938  | LOC_Os06g41680.1 |
| DG <sub>HP</sub> | Os038942_01 | S3 | 0.000  | -1.735 | P | 198.955  | P | 204.434  | P | 680.478  | LOC_Os08g37670.1 |
| DG <sub>HP</sub> | Os039107_01 | S3 | 1.354  | 0.000  | P | 126.554  | P | 323.410  | P | 409.390  | LOC_Os04g56800.1 |
| DG <sub>HP</sub> | Os039170_01 | S3 | -0.948 | 0.000  | P | 1161.087 | P | 601.902  | P | 635.208  | LOC_Os02g47744.4 |
| DG <sub>HP</sub> | Os039470_01 | S3 | 1.261  | 0.000  | P | 163.917  | P | 392.722  | P | 389.886  | LOC_Os01g24350.1 |
| DG <sub>HP</sub> | Os039580_01 | S3 | -1.602 | 10.000 | P | 1155.843 | P | 380.629  | A | 76.230   | LOC_Os02g40180.1 |
| DG <sub>HP</sub> | Os039593_01 | S3 | -1.002 | 1.851  | P | 1350.998 | P | 674.643  | P | 186.954  | -                |
| DG <sub>HP</sub> | Os039978_01 | S3 | -1.229 | 0.000  | P | 406.686  | P | 173.479  | P | 97.846   | -                |
| DG <sub>HP</sub> | Os040246_01 | S3 | -1.022 | 0.000  | P | 875.018  | P | 430.863  | P | 459.539  | LOC_Os08g44670.1 |
| DG <sub>HP</sub> | Os040328_01 | S3 | 10.000 | -1.263 | A | 62.654   | P | 265.940  | P | 638.184  | LOC_Os05g31400.1 |
| DG <sub>HP</sub> | Os040512_01 | S3 | -0.945 | 0.000  | P | 574.197  | P | 298.201  | P | 170.382  | LOC_Os04g54990.1 |
| DG <sub>HP</sub> | Os040526_01 | S3 | 1.167  | 0.000  | P | 141.729  | P | 318.282  | P | 502.493  | LOC_Os01g62680.1 |
| DG <sub>HP</sub> | Os041048_01 | S3 | -1.039 | 0.000  | P | 535.838  | P | 260.735  | P | 148.334  | -                |
| DG <sub>HP</sub> | Os041150_01 | S3 | 1.510  | 0.000  | P | 221.410  | P | 630.476  | P | 771.738  | LOC_Os06g43850.1 |
| DG <sub>HP</sub> | Os041241_01 | S3 | 1.644  | 0.000  | P | 161.040  | P | 503.136  | P | 677.112  | LOC_Os01g21270.1 |
| DG <sub>HP</sub> | Os041436_01 | S3 | -1.321 | 0.000  | P | 1054.481 | P | 422.106  | P | 350.264  | LOC_Os11g47950.1 |
| DG <sub>HP</sub> | Os041507_01 | S3 | 1.415  | 0.000  | P | 370.056  | P | 986.584  | P | 1105.807 | -                |
| DG <sub>HP</sub> | Os042108_01 | S3 | 0.000  | -1.115 | P | 334.894  | P | 317.186  | P | 686.853  | LOC_Os09g26580.1 |
| DG <sub>HP</sub> | Os042254_01 | S3 | 0.000  | -1.132 | P | 1061.870 | P | 650.002  | P | 1424.262 | LOC_Os02g26380.1 |
| DG <sub>HP</sub> | Os042441_01 | S3 | 0.000  | -1.214 | P | 357.153  | P | 763.471  | P | 1771.293 | LOC_Os06g13800.1 |
| DG <sub>HP</sub> | Os042450_01 | S3 | 0.000  | 1.395  | P | 321.881  | P | 250.228  | P | 95.177   | LOC_Os11g28104.1 |
| DG <sub>HP</sub> | Os042492_01 | S3 | 0.000  | -1.029 | P | 418.042  | P | 376.558  | P | 768.572  | -                |
| DG <sub>HP</sub> | Os042564_01 | S3 | 0.000  | 1.420  | P | 295.319  | P | 291.682  | P | 109.027  | LOC_Os12g12640.1 |
| DG <sub>HP</sub> | Os042725_01 | S3 | 0.000  | 1.754  | P | 228.479  | P | 256.425  | P | 76.002   | LOC_Os07g35740.1 |
| DG <sub>HP</sub> | Os042994_01 | S3 | 0.000  | -0.980 | P | 148.019  | P | 254.347  | P | 501.683  | LOC_Os05g31090.1 |
| DG <sub>HP</sub> | Os043254_01 | S3 | 0.000  | -1.121 | P | 252.497  | P | 218.812  | P | 475.964  | LOC_Os09g18070.1 |
| DG <sub>HP</sub> | Os043530_01 | S3 | 0.000  | 1.281  | P | 1378.785 | P | 1037.250 | P | 426.780  | LOC_Os06g06340.1 |
| DG <sub>HP</sub> | Os043706_01 | S3 | 0.000  | 1.589  | P | 283.419  | P | 403.180  | P | 134.038  | LOC_Os08g13790.1 |

|                  |             |    |       |        |   |           |   |           |   |          |                  |
|------------------|-------------|----|-------|--------|---|-----------|---|-----------|---|----------|------------------|
| DG <sub>HP</sub> | Os043735_01 | S3 | 0.000 | 1.374  | P | 564.826   | P | 475.524   | P | 183.504  | LOC_Os05g04380.1 |
| DG <sub>HP</sub> | Os043803_01 | S3 | 0.000 | 2.353  | P | 535.878   | P | 603.540   | P | 118.157  | LOC_Os04g20280.1 |
| DG <sub>HP</sub> | Os044089_01 | S3 | 0.000 | -1.182 | P | 397.007   | P | 373.329   | P | 847.000  | LOC_Os07g12450.1 |
| DG <sub>HP</sub> | Os044196_01 | S3 | 0.000 | 1.448  | P | 1003.780  | P | 737.735   | P | 270.400  | LOC_Os05g32650.1 |
| DG <sub>HP</sub> | Os044300_01 | S3 | 0.000 | 3.060  | P | 21361.559 | P | 21318.182 | P | 2556.570 | LOC_Os05g11320.1 |
| DG <sub>HP</sub> | Os044334_01 | S3 | 0.000 | 1.259  | P | 239.450   | P | 222.386   | P | 92.945   | LOC_Os06g15020.1 |
| DG <sub>HP</sub> | Os044467_01 | S3 | 0.000 | 1.442  | P | 1359.797  | P | 1406.096  | P | 517.361  | LOC_Os03g63310.1 |
| DG <sub>HP</sub> | Os044477_01 | S3 | 0.000 | 1.541  | P | 272.552   | P | 223.651   | P | 76.879   | LOC_Os12g10800.1 |
| DG <sub>HP</sub> | Os044585_01 | S3 | 0.000 | 2.160  | P | 374.925   | P | 434.205   | P | 97.123   | LOC_Os05g14360.1 |
| DG <sub>HP</sub> | Os044729_01 | S3 | 1.683 | 0.000  | P | 105.878   | P | 339.877   | P | 404.700  | LOC_Os05g30200.1 |
| DG <sub>HP</sub> | Os044800_01 | S3 | 0.000 | 2.277  | P | 616.772   | P | 548.592   | P | 113.221  | LOC_Os08g31228.1 |
| DG <sub>HP</sub> | Os044943_01 | S3 | 0.000 | -1.156 | P | 214.045   | P | 416.394   | P | 928.002  | LOC_Os07g47750.1 |
| DG <sub>HP</sub> | Os045005_01 | S3 | 1.484 | 0.000  | P | 746.814   | P | 2089.172  | P | 2828.470 | -                |
| DG <sub>HP</sub> | Os045055_01 | S3 | 1.452 | 0.000  | P | 271.916   | P | 743.777   | P | 999.942  | -                |
| DG <sub>HP</sub> | Os045207_01 | S3 | 1.761 | 0.000  | P | 348.701   | P | 1181.493  | P | 2036.576 | -                |
| DG <sub>HP</sub> | Os045261_01 | S3 | 1.136 | 0.000  | P | 208.139   | P | 457.571   | P | 769.017  | LOC_Os02g34610.1 |
| DG <sub>HP</sub> | Os045285_01 | S3 | 0.000 | 1.531  | P | 611.179   | P | 496.124   | P | 171.669  | LOC_Os12g09720.1 |
| DG <sub>HP</sub> | Os045308_01 | S3 | 0.000 | 1.348  | P | 169.764   | P | 223.023   | P | 87.640   | LOC_Os06g37250.1 |
| DG <sub>HP</sub> | Os045521_01 | S3 | 1.300 | 0.000  | P | 299.250   | P | 736.758   | P | 855.011  | -                |
| DG <sub>HP</sub> | Os045535_01 | S3 | 1.107 | 0.000  | P | 273.493   | P | 589.217   | P | 900.619  | -                |
| DG <sub>HP</sub> | Os045563_01 | S3 | 0.000 | 1.344  | P | 296.159   | P | 324.002   | P | 127.629  | LOC_Os08g15950.1 |
| DG <sub>HP</sub> | Os045577_01 | S3 | 1.644 | 0.000  | P | 520.462   | P | 1626.740  | P | 2812.283 | LOC_Os12g07990.1 |
| DG <sub>HP</sub> | Os045661_01 | S3 | 0.000 | 1.410  | P | 638.373   | P | 659.015   | P | 248.024  | LOC_Os10g23180.1 |
| DG <sub>HP</sub> | Os045664_01 | S3 | 1.888 | 0.000  | P | 345.258   | P | 1278.217  | P | 2417.400 | LOC_Os02g25890.1 |
| DG <sub>HP</sub> | Os045861_01 | S3 | 1.245 | 0.000  | P | 479.469   | P | 1136.729  | P | 1336.020 | LOC_Os09g19200.1 |
| DG <sub>HP</sub> | Os046004_01 | S3 | 1.133 | 0.000  | P | 788.437   | P | 1729.470  | P | 2325.441 | LOC_Os02g24410.1 |
| DG <sub>HP</sub> | Os046095_01 | S3 | 1.765 | 0.000  | P | 191.789   | P | 652.034   | P | 1053.077 | LOC_Os08g22700.1 |
| DG <sub>HP</sub> | Os046150_01 | S3 | 0.000 | 1.291  | P | 231.060   | P | 231.822   | P | 94.737   | LOC_Os10g40450.1 |
| DG <sub>HP</sub> | Os046251_01 | S3 | 1.156 | 0.000  | P | 186.759   | P | 416.042   | P | 713.963  | LOC_Os11g16850.1 |
| DG <sub>HP</sub> | Os046281_01 | S3 | 1.104 | -1.288 | P | 316.742   | P | 680.816   | P | 1662.829 | LOC_Os10g38640.1 |
| DG <sub>HP</sub> | Os046306_01 | S3 | 1.249 | 0.000  | P | 2347.797  | P | 5581.231  | P | 7629.437 | -                |



|                  |             |    |        |        |   |           |   |           |   |           |                  |
|------------------|-------------|----|--------|--------|---|-----------|---|-----------|---|-----------|------------------|
| DG <sub>HP</sub> | Os046332_01 | S3 | 1.751  | 0.000  | P | 11830.492 | P | 39819.773 | P | 55230.288 | LOC_Os11g19180.1 |
| DG <sub>HP</sub> | Os046492_01 | S3 | 0.000  | -1.113 | P | 729.376   | P | 634.354   | P | 1372.472  | LOC_Os10g11012.1 |
| DG <sub>HP</sub> | Os046570_01 | S3 | 1.155  | 0.000  | P | 341.441   | P | 760.352   | P | 1154.727  | LOC_Os09g06330.1 |
| DG <sub>HP</sub> | Os046599_01 | S3 | 1.420  | 0.000  | P | 1509.743  | P | 4038.797  | P | 6458.481  | LOC_Os07g33280.1 |
| DG <sub>HP</sub> | Os046857_01 | S3 | 1.538  | 0.000  | P | 372.856   | P | 1082.381  | P | 1813.419  | LOC_Os02g38330.1 |
| DG <sub>HP</sub> | Os046947_01 | S3 | 1.319  | 0.000  | P | 124.081   | P | 309.567   | P | 376.957   | -                |
| DG <sub>HP</sub> | Os047260_01 | S3 | -1.024 | 0.000  | P | 6876.416  | P | 3381.847  | P | 1820.659  | LOC_Os06g34840.1 |
| DG <sub>HP</sub> | Os047419_01 | S3 | -0.963 | 0.000  | P | 482.037   | P | 247.231   | P | 297.979   | LOC_Os04g01250.2 |
| DG <sub>HP</sub> | Os047500_01 | S3 | -1.306 | 2.742  | P | 5103.033  | P | 2064.422  | P | 308.657   | LOC_Os06g43740.1 |
| DG <sub>HP</sub> | Os047560_01 | S3 | 0.000  | 1.638  | P | 1182.610  | P | 1455.186  | P | 467.621   | LOC_Os07g12890.1 |
| DG <sub>HP</sub> | Os047852_01 | S3 | 1.552  | 0.000  | P | 194.851   | P | 571.278   | P | 1053.995  | LOC_Os10g24050.1 |
| DG <sub>HP</sub> | Os048190_01 | S3 | 1.116  | 0.000  | P | 161.862   | P | 350.839   | P | 610.262   | LOC_Os07g27970.1 |
| DG <sub>HP</sub> | Os048236_01 | S3 | 1.200  | 0.000  | P | 264.475   | P | 607.484   | P | 904.336   | LOC_Os05g34740.1 |
| DG <sub>HP</sub> | Os048275_01 | S3 | 1.118  | 0.000  | P | 156.475   | P | 339.625   | P | 190.562   | LOC_Os07g48190.1 |
| DG <sub>HP</sub> | Os048291_01 | S3 | 0.000  | 1.339  | P | 376.976   | P | 292.996   | P | 115.854   | LOC_Os05g20840.1 |
| DG <sub>HP</sub> | Os048583_01 | S3 | -0.944 | 0.000  | P | 323.961   | P | 168.400   | P | 200.388   | LOC_Os01g67670.1 |
| DG <sub>HP</sub> | Os048756_01 | S3 | -1.021 | 1.540  | P | 618.952   | P | 304.899   | P | 104.835   | LOC_Os06g23780.1 |
| DG <sub>HP</sub> | Os048781_01 | S3 | 0.000  | 2.740  | P | 2210.579  | P | 1643.526  | P | 246.009   | -                |
| DG <sub>HP</sub> | Os048837_01 | S3 | 0.000  | 1.796  | P | 805.100   | P | 439.710   | P | 126.600   | LOC_Os10g06810.1 |
| DG <sub>HP</sub> | Os048884_01 | S3 | 0.000  | 1.336  | P | 222.175   | P | 218.583   | P | 86.593    | LOC_Os10g02390.1 |
| DG <sub>HP</sub> | Os049029_01 | S3 | -1.583 | 0.000  | P | 441.412   | P | 147.370   | P | 129.003   | LOC_Os02g46770.1 |
| DG <sub>HP</sub> | Os049068_01 | S3 | 0.000  | -0.974 | P | 245.442   | P | 356.993   | P | 701.204   | -                |
| DG <sub>HP</sub> | Os049669_01 | S3 | 0.000  | -1.178 | P | 247.859   | P | 340.277   | P | 769.892   | -                |
| DG <sub>HP</sub> | Os050257_01 | S3 | 1.320  | 0.000  | P | 426.031   | P | 1063.722  | P | 1517.968  | LOC_Os06g34800.1 |
| DG <sub>HP</sub> | Os050258_01 | S3 | 0.000  | -1.082 | P | 365.103   | P | 434.586   | P | 920.167   | LOC_Os12g22230.1 |
| DG <sub>HP</sub> | Os050266_01 | S3 | 0.000  | 1.448  | P | 535.871   | P | 640.785   | P | 234.794   | LOC_Os04g43720.1 |
| DG <sub>HP</sub> | Os050517_01 | S3 | 0.000  | 1.852  | P | 887.872   | P | 761.814   | P | 211.031   | LOC_Os12g26490.1 |
| DG <sub>HP</sub> | Os051177_01 | S3 | 1.204  | 0.000  | P | 897.348   | P | 2067.322  | P | 2992.294  | -                |
| DG <sub>HP</sub> | Os051181_01 | S3 | 1.230  | 0.000  | P | 539.589   | P | 1265.729  | P | 1556.903  | -                |
| DG <sub>HP</sub> | Os051254_01 | S3 | 1.186  | 0.000  | P | 535.026   | P | 1216.970  | P | 1641.699  | -                |
| DG <sub>HP</sub> | Os051326_01 | S3 | 1.100  | 0.000  | P | 193.725   | P | 415.260   | P | 643.308   | LOC_Os05g35910.1 |

|                  |             |    |        |        |   |           |   |           |   |          |                  |
|------------------|-------------|----|--------|--------|---|-----------|---|-----------|---|----------|------------------|
| DG <sub>HP</sub> | Os051583_01 | S3 | 0.000  | 1.307  | P | 491.374   | P | 329.958   | P | 133.331  | -                |
| DG <sub>HP</sub> | Os051737_01 | S3 | 1.224  | 0.000  | P | 163.788   | P | 382.611   | P | 537.153  | LOC_Os06g26050.1 |
| DG <sub>HP</sub> | Os051919_01 | S3 | -0.989 | 0.000  | P | 2059.416  | P | 1037.692  | P | 926.877  | LOC_Os12g02310.1 |
| DG <sub>HP</sub> | Os051935_01 | S3 | 1.410  | 0.000  | P | 715.890   | P | 1902.407  | P | 2985.035 | LOC_Os01g15270.1 |
| DG <sub>HP</sub> | Os051938_01 | S3 | 1.557  | 0.000  | P | 123.604   | P | 363.609   | P | 433.131  | LOC_Os10g39410.1 |
| DG <sub>HP</sub> | Os052021_01 | S3 | 0.000  | 1.684  | P | 1501.036  | P | 795.574   | P | 247.656  | LOC_Os12g05430.1 |
| DG <sub>HP</sub> | Os052029_01 | S3 | 0.000  | 1.301  | P | 823.476   | P | 752.405   | P | 305.399  | LOC_Os07g42300.1 |
| DG <sub>HP</sub> | Os052067_01 | S3 | 0.000  | 1.824  | P | 1318.172  | P | 701.957   | P | 198.256  | -                |
| DG <sub>HP</sub> | Os052072_01 | S3 | 0.000  | 1.712  | P | 267.102   | P | 325.225   | P | 99.261   | LOC_Os12g26290.2 |
| DG <sub>HP</sub> | Os052085_01 | S3 | 0.000  | 1.900  | P | 21800.886 | P | 12278.960 | P | 3290.245 | LOC_Os07g25430.3 |
| DG <sub>HP</sub> | Os052088_01 | S3 | 0.000  | 1.322  | P | 437.479   | P | 472.228   | P | 188.921  | LOC_Os03g14630.1 |
| DG <sub>HP</sub> | Os052091_01 | S3 | -1.163 | 1.751  | P | 798.107   | P | 356.502   | P | 105.924  | LOC_Os07g08660.1 |
| DG <sub>HP</sub> | Os052153_01 | S3 | 0.000  | 1.390  | P | 694.705   | P | 455.475   | P | 173.803  | LOC_Os03g14530.1 |
| DG <sub>HP</sub> | Os052160_01 | S3 | 0.000  | 1.866  | P | 597.229   | P | 804.094   | P | 220.657  | LOC_Os01g58420.1 |
| DG <sub>HP</sub> | Os052183_01 | S3 | 0.000  | 1.460  | P | 340.411   | P | 325.161   | P | 118.178  | LOC_Os01g66960.1 |
| DG <sub>HP</sub> | Os052213_01 | S3 | 0.000  | -1.025 | P | 1052.653  | P | 631.566   | P | 1285.526 | LOC_Os01g22900.1 |
| DG <sub>HP</sub> | Os052280_01 | S3 | 0.000  | 1.274  | P | 791.701   | P | 962.444   | P | 397.892  | LOC_Os03g29260.2 |
| DG <sub>HP</sub> | Os052430_01 | S3 | -0.954 | 0.000  | P | 789.496   | P | 407.643   | P | 191.874  | LOC_Os07g29620.1 |
| DG <sub>HP</sub> | Os052435_01 | S3 | -0.918 | 0.000  | P | 540.270   | P | 286.017   | P | 194.799  | -                |
| DG <sub>HP</sub> | Os052461_01 | S3 | 0.000  | 1.825  | P | 4357.999  | P | 3846.062  | P | 1085.347 | LOC_Os04g33110.1 |
| DG <sub>HP</sub> | Os052475_01 | S3 | 0.000  | 1.619  | P | 282.647   | P | 446.674   | P | 145.441  | LOC_Os02g47000.1 |
| DG <sub>HP</sub> | Os052484_01 | S3 | 1.126  | 2.389  | P | 1113.419  | P | 2429.760  | P | 463.762  | LOC_Os02g20360.1 |
| DG <sub>HP</sub> | Os052507_01 | S3 | 0.000  | 1.402  | P | 422.956   | P | 373.129   | P | 141.145  | LOC_Os05g06350.1 |
| DG <sub>HP</sub> | Os052535_01 | S3 | 0.000  | -1.143 | P | 1172.922  | P | 770.709   | P | 1702.609 | LOC_Os03g54160.2 |
| DG <sub>HP</sub> | Os052753_01 | S3 | 0.000  | 1.294  | P | 203.764   | P | 250.525   | P | 102.137  | LOC_Os03g25770.2 |
| DG <sub>HP</sub> | Os052801_01 | S3 | 0.000  | 1.432  | P | 294.249   | P | 238.045   | P | 88.233   | LOC_Os07g46350.1 |
| DG <sub>HP</sub> | Os052844_01 | S3 | 0.000  | 1.958  | P | 949.063   | P | 1167.342  | P | 300.549  | -                |
| DG <sub>HP</sub> | Os053269_01 | S3 | 0.000  | 1.750  | P | 437.998   | P | 484.606   | P | 144.069  | LOC_Os05g46620.1 |
| DG <sub>HP</sub> | Os053550_01 | S3 | 0.000  | 1.851  | P | 730.808   | P | 752.229   | P | 208.489  | LOC_Os03g56370.1 |
| DG <sub>HP</sub> | Os053642_01 | S3 | 0.000  | 1.472  | P | 301.888   | P | 422.672   | P | 152.336  | LOC_Os01g67490.2 |
| DG <sub>HP</sub> | Os053967_01 | S3 | 0.000  | -1.142 | P | 869.929   | P | 855.616   | P | 1888.722 | LOC_Os01g05850.1 |

|                  |             |    |        |        |   |           |   |           |   |           |                  |
|------------------|-------------|----|--------|--------|---|-----------|---|-----------|---|-----------|------------------|
| DG <sub>HP</sub> | Os054260_01 | S3 | 0.000  | 1.550  | P | 243.572   | P | 290.409   | P | 99.143    | LOC_Os04g14790.1 |
| DG <sub>HP</sub> | Os054377_01 | S3 | 0.000  | 1.705  | P | 324.865   | P | 440.790   | P | 135.191   | LOC_Os05g31140.1 |
| DG <sub>HP</sub> | Os054432_01 | S3 | -0.928 | 0.000  | P | 9512.894  | P | 4999.304  | P | 2485.754  | LOC_Os04g58200.1 |
| DG <sub>HP</sub> | Os054556_01 | S3 | 0.000  | -1.782 | P | 2848.823  | P | 4939.139  | P | 16991.597 | LOC_Os01g14410.1 |
| DG <sub>HP</sub> | Os054590_01 | S3 | 1.153  | 0.000  | P | 365.466   | P | 812.621   | P | 778.981   | LOC_Os03g09250.2 |
| DG <sub>HP</sub> | Os054592_01 | S3 | 0.000  | 1.629  | P | 596.577   | P | 440.116   | P | 142.320   | LOC_Os05g06310.1 |
| DG <sub>HP</sub> | Os054602_01 | S3 | 0.000  | 1.596  | P | 475.799   | P | 338.152   | P | 111.834   | LOC_Os08g35190.2 |
| DG <sub>HP</sub> | Os054607_01 | S3 | -0.953 | 1.659  | P | 852.613   | P | 440.412   | P | 139.493   | LOC_Os05g06780.1 |
| DG <sub>HP</sub> | Os054637_01 | S3 | 0.000  | 1.725  | P | 477.672   | P | 550.699   | P | 166.588   | LOC_Os09g26880.1 |
| DG <sub>HP</sub> | Os054638_01 | S3 | 0.000  | 1.542  | P | 743.176   | P | 466.957   | P | 160.375   | -                |
| DG <sub>HP</sub> | Os054660_01 | S3 | 0.000  | 1.513  | P | 23099.878 | P | 14374.025 | P | 5035.711  | LOC_Os04g41560.2 |
| DG <sub>HP</sub> | Os054673_01 | S3 | 0.000  | 2.197  | P | 2837.491  | P | 2723.583  | P | 594.112   | LOC_Os03g55540.1 |
| DG <sub>HP</sub> | Os054700_01 | S3 | 0.000  | 1.699  | P | 3586.978  | P | 4377.187  | P | 1348.555  | LOC_Os07g44330.2 |
| DG <sub>HP</sub> | Os054724_01 | S3 | 0.000  | 1.476  | P | 717.453   | P | 647.052   | P | 232.587   | LOC_Os09g35730.1 |
| DG <sub>HP</sub> | Os054730_01 | S3 | 0.000  | 2.002  | P | 554.886   | P | 622.073   | P | 155.340   | LOC_Os05g01050.2 |
| DG <sub>HP</sub> | Os054747_01 | S3 | 0.000  | 1.932  | P | 340.192   | P | 492.696   | P | 129.089   | LOC_Os05g06270.1 |
| DG <sub>HP</sub> | Os054752_01 | S3 | 0.000  | 1.276  | P | 2695.788  | P | 2017.469  | P | 833.350   | -                |
| DG <sub>HP</sub> | Os054785_01 | S3 | 0.000  | 1.267  | P | 1613.848  | P | 1227.024  | P | 509.900   | LOC_Os01g09220.1 |
| DG <sub>HP</sub> | Os054974_01 | S3 | 0.000  | 2.118  | P | 359.759   | P | 446.569   | P | 102.906   | -                |
| DG <sub>HP</sub> | Os054975_01 | S3 | 0.000  | 1.423  | P | 330.309   | P | 263.505   | P | 98.241    | LOC_Os04g33990.1 |
| DG <sub>HP</sub> | Os054977_01 | S3 | 0.000  | 1.489  | P | 891.456   | P | 599.693   | P | 213.638   | LOC_Os01g59970.1 |
| DG <sub>HP</sub> | Os054983_01 | S3 | 0.000  | 2.253  | P | 539.885   | P | 507.171   | P | 106.414   | LOC_Os05g33310.1 |
| DG <sub>HP</sub> | Os055024_01 | S3 | 0.000  | 1.379  | P | 2259.013  | P | 1603.749  | P | 616.490   | LOC_Os04g53310.1 |
| DG <sub>HP</sub> | Os055027_01 | S3 | 0.000  | 1.439  | P | 258.400   | P | 280.606   | P | 103.521   | LOC_Os04g52460.1 |
| DG <sub>HP</sub> | Os055030_01 | S3 | 0.000  | 2.075  | P | 371.152   | P | 350.343   | P | 83.132    | LOC_Os04g23180.1 |
| DG <sub>HP</sub> | Os055071_01 | S3 | 0.000  | 1.752  | P | 488.719   | P | 527.948   | P | 156.754   | LOC_Os10g10500.1 |
| DG <sub>HP</sub> | Os055094_01 | S3 | 0.000  | 1.439  | P | 432.152   | P | 486.738   | P | 179.534   | LOC_Os07g14590.1 |
| DG <sub>HP</sub> | Os055100_01 | S3 | 0.000  | 1.540  | P | 290.115   | P | 352.962   | P | 121.352   | LOC_Os01g69940.1 |
| DG <sub>HP</sub> | Os055116_01 | S3 | 0.000  | 1.877  | P | 215.859   | P | 262.145   | P | 71.355    | LOC_Os10g17770.1 |
| DG <sub>HP</sub> | Os055122_01 | S3 | 0.000  | 1.437  | P | 484.925   | P | 429.800   | P | 158.775   | LOC_Os04g42380.1 |
| DG <sub>HP</sub> | Os055155_01 | S3 | 0.000  | 2.827  | P | 1129.420  | P | 831.376   | P | 117.186   | LOC_Os12g10220.1 |

|                  |             |    |        |        |   |           |   |           |   |           |                  |
|------------------|-------------|----|--------|--------|---|-----------|---|-----------|---|-----------|------------------|
| DG <sub>HP</sub> | Os055171_01 | S3 | 0.000  | 2.663  | P | 1724.488  | P | 1589.554  | P | 250.933   | LOC_Os06g04230.1 |
| DG <sub>HP</sub> | Os055198_01 | S3 | 1.169  | 0.000  | P | 223.927   | P | 503.493   | P | 464.234   | LOC_Os04g46980.1 |
| DG <sub>HP</sub> | Os055253_01 | S3 | 0.000  | 1.279  | P | 266.385   | P | 340.585   | P | 140.342   | -                |
| DG <sub>HP</sub> | Os055308_01 | S3 | 10.000 | 1.940  | A | 330.660   | P | 621.442   | P | 161.931   | LOC_Os07g48020.1 |
| DG <sub>HP</sub> | Os055334_01 | S3 | 0.000  | 1.470  | P | 514.067   | P | 335.478   | P | 121.092   | LOC_Os10g37240.1 |
| DG <sub>HP</sub> | Os055417_02 | S3 | 0.000  | 1.512  | P | 369.646   | P | 423.220   | P | 148.423   | -                |
| DG <sub>HP</sub> | Os055646_01 | S3 | -1.053 | 1.390  | P | 1693.501  | P | 816.049   | P | 311.304   | LOC_Os12g29670.1 |
| DG <sub>HP</sub> | Os055679_01 | S3 | 0.000  | 1.419  | P | 407.311   | P | 498.655   | P | 186.530   | LOC_Os01g12270.1 |
| DG <sub>HP</sub> | Os055709_01 | S3 | 1.222  | 0.000  | P | 1571.747  | P | 3667.438  | P | 5566.987  | LOC_Os12g41110.1 |
| DG <sub>HP</sub> | Os055763_01 | S3 | 0.000  | 1.473  | P | 898.122   | P | 736.847   | P | 265.413   | -                |
| DG <sub>HP</sub> | Os055785_01 | S3 | 0.000  | 1.266  | P | 1057.381  | P | 637.354   | P | 264.960   | LOC_Os01g56220.1 |
| DG <sub>HP</sub> | Os055855_01 | S3 | 0.000  | 1.579  | P | 271.274   | P | 345.031   | P | 115.494   | LOC_Os01g70930.1 |
| DG <sub>HP</sub> | Os056478_01 | S3 | 1.144  | 0.000  | P | 137.719   | P | 304.362   | P | 251.859   | LOC_Os07g02000.1 |
| DG <sub>HP</sub> | Os056703_01 | S3 | 0.000  | 1.464  | P | 744.513   | P | 431.195   | P | 156.299   | LOC_Os01g09150.1 |
| DG <sub>HP</sub> | Os056758_01 | S3 | 0.000  | 1.716  | P | 799.965   | P | 495.066   | P | 150.727   | -                |
| DG <sub>HP</sub> | Os056914_02 | S3 | 1.541  | 0.000  | P | 263.045   | P | 765.441   | P | 704.520   | LOC_Os03g51600.1 |
| DG <sub>HP</sub> | Os056918_02 | S3 | 0.000  | 2.125  | P | 3081.512  | P | 2380.425  | P | 545.623   | LOC_Os01g13690.1 |
| DG <sub>HP</sub> | Os056919_02 | S3 | -1.240 | 0.000  | P | 473.297   | P | 200.363   | P | 152.053   | -                |
| DG <sub>HP</sub> | Os056921_02 | S3 | 0.000  | 1.366  | P | 289.114   | P | 313.278   | P | 121.562   | -                |
| DG <sub>HP</sub> | Os056923_02 | S3 | 1.484  | 0.000  | P | 105.706   | P | 295.766   | P | 307.351   | LOC_Os02g06584.2 |
| DG <sub>HP</sub> | Os056940_02 | S3 | 1.433  | 0.000  | P | 106.182   | P | 286.725   | P | 263.477   | -                |
| DG <sub>HP</sub> | Os056946_01 | S3 | 0.000  | -1.147 | P | 243.123   | P | 504.284   | P | 1116.512  | LOC_Os05g34770.1 |
| DG <sub>HP</sub> | Os057068_02 | S3 | 1.656  | 0.000  | P | 136.616   | P | 430.398   | P | 719.798   | LOC_Os08g04390.2 |
| DG <sub>HP</sub> | Os057173_02 | S3 | 10.000 | -1.212 | A | 171.859   | P | 249.794   | P | 578.593   | LOC_Os12g37260.1 |
| DG <sub>HP</sub> | Os057211_02 | S3 | 1.270  | 0.000  | P | 187.219   | P | 451.530   | P | 306.597   | LOC_Os01g05970.1 |
| DG <sub>HP</sub> | Os057254_02 | S3 | 0.000  | 1.366  | P | 41180.030 | P | 27824.079 | P | 10793.176 | -                |
| DG <sub>HP</sub> | Os057284_02 | S3 | 1.156  | 0.000  | P | 310.805   | P | 692.596   | P | 559.044   | LOC_Os07g02800.3 |
| DG <sub>HP</sub> | Os057402_02 | S3 | 10.000 | 1.764  | A | 435.279   | P | 454.841   | P | 133.942   | -                |
| DG <sub>HP</sub> | Os057481_02 | S3 | 1.253  | 0.000  | P | 124.842   | P | 297.622   | P | 416.199   | LOC_Os04g43390.1 |
| DG <sub>HP</sub> | Os057614_02 | S3 | 1.994  | 0.000  | P | 112.019   | P | 446.126   | P | 511.801   | LOC_Os06g22060.1 |
| DG <sub>HP</sub> | Os057647_02 | S3 | 2.228  | 0.000  | P | 126.616   | P | 593.160   | P | 1116.065  | -                |

| DG <sub>HP</sub> | GeneID             | S6            | log2(Ratio(L/9)) |        | log2(Ratio(L/P)) |           | Fi.leaf_9311.flag | Fi.leaf_9311 | Fi.leaf_LYP9.flag | Fi.leaf_LYP9 |                  |
|------------------|--------------------|---------------|------------------|--------|------------------|-----------|-------------------|--------------|-------------------|--------------|------------------|
|                  | Fi.leaf_PA64s.flag | Fi.leaf_PA64s |                  |        |                  |           |                   |              |                   |              |                  |
| DG <sub>HP</sub> | Os000062_01        | S6            | -1.259           | 0.000  | P                | 560.776   | P                 | 234.324      | P                 | 324.987      | LOC_Os01g55570.1 |
| DG <sub>HP</sub> | Os000111_01        | S6            | 0.000            | 1.142  | P                | 298.687   | P                 | 335.534      | P                 | 152.079      | LOC_Os11g32880.1 |
| DG <sub>HP</sub> | Os000152_01        | S6            | -1.017           | 0.000  | P                | 759.778   | P                 | 375.376      | P                 | 615.459      | LOC_Os02g49680.1 |
| DG <sub>HP</sub> | Os000252_01        | S6            | 0.984            | 0.000  | P                | 227.187   | P                 | 449.440      | P                 | 506.898      | LOC_Os02g47140.2 |
| DG <sub>HP</sub> | Os000254_01        | S6            | -1.088           | 0.000  | P                | 25731.349 | P                 | 12107.660    | P                 | 16646.660    | -                |
| DG <sub>HP</sub> | Os000271_01        | S6            | -1.094           | 0.000  | P                | 512.264   | P                 | 240.054      | P                 | 254.452      | LOC_Os02g22100.7 |
| DG <sub>HP</sub> | Os000282_01        | S6            | 0.000            | -0.880 | P                | 516.492   | P                 | 652.508      | P                 | 1200.853     | LOC_Os03g60100.1 |
| DG <sub>HP</sub> | Os000322_01        | S6            | -1.441           | 0.000  | P                | 794.664   | P                 | 292.598      | P                 | 362.852      | LOC_Os07g28610.2 |
| DG <sub>HP</sub> | Os000375_01        | S6            | 0.000            | -0.808 | P                | 1278.712  | P                 | 1688.329     | P                 | 2956.818     | LOC_Os02g09590.1 |
| DG <sub>HP</sub> | Os000429_01        | S6            | 1.076            | 1.115  | P                | 254.715   | P                 | 537.056      | P                 | 248.024      | LOC_Os01g68770.1 |
| DG <sub>HP</sub> | Os000431_01        | S6            | -1.181           | 1.224  | P                | 26743.943 | P                 | 11795.114    | P                 | 5047.911     | LOC_Os01g68300.1 |
| DG <sub>HP</sub> | Os000445_01        | S6            | 0.962            | 0.000  | P                | 449.403   | P                 | 875.559      | P                 | 517.017      | LOC_Os01g37910.1 |
| DG <sub>HP</sub> | Os000548_01        | S6            | -0.994           | 0.000  | P                | 558.767   | P                 | 280.491      | P                 | 398.197      | LOC_Os07g09040.1 |
| DG <sub>HP</sub> | Os000754_01        | S6            | 0.000            | 1.547  | P                | 428.814   | P                 | 413.153      | P                 | 141.344      | LOC_Os12g19304.3 |
| DG <sub>HP</sub> | Os000862_01        | S6            | 10.000           | -1.054 | A                | 146.160   | P                 | 300.086      | P                 | 623.162      | LOC_Os07g25440.2 |
| DG <sub>HP</sub> | Os000918_01        | S6            | 0.000            | -0.957 | P                | 383.363   | P                 | 226.494      | P                 | 439.790      | LOC_Os11g44960.1 |
| DG <sub>HP</sub> | Os000965_01        | S6            | 0.000            | 0.907  | P                | 986.300   | P                 | 856.516      | P                 | 456.791      | LOC_Os01g73990.1 |
| DG <sub>HP</sub> | Os000994_01        | S6            | 0.000            | -1.351 | P                | 429.314   | P                 | 478.596      | P                 | 1220.749     | -                |
| DG <sub>HP</sub> | Os001011_01        | S6            | -1.205           | 0.000  | P                | 795.638   | P                 | 345.239      | P                 | 507.951      | LOC_Os02g43670.1 |
| DG <sub>HP</sub> | Os001096_01        | S6            | 0.000            | -0.829 | P                | 191.799   | P                 | 160.145      | P                 | 284.404      | LOC_Os12g06670.1 |
| DG <sub>HP</sub> | Os001220_01        | S6            | 0.000            | 0.957  | P                | 450.280   | P                 | 445.988      | P                 | 229.753      | LOC_Os06g21110.1 |
| DG <sub>HP</sub> | Os001579_01        | S6            | 0.940            | 0.000  | P                | 1043.764  | P                 | 2002.795     | P                 | 1258.075     | LOC_Os10g36170.1 |
| DG <sub>HP</sub> | Os001682_01        | S6            | -1.073           | 0.000  | P                | 1175.180  | P                 | 558.595      | P                 | 717.592      | -                |
| DG <sub>HP</sub> | Os001884_01        | S6            | 2.445            | 1.856  | P                | 239.627   | P                 | 1304.415     | P                 | 360.215      | LOC_Os03g60580.1 |
| DG <sub>HP</sub> | Os001903_01        | S6            | 0.000            | 2.416  | P                | 602.550   | P                 | 1101.214     | P                 | 206.285      | LOC_Os01g68290.1 |
| DG <sub>HP</sub> | Os001958_01        | S6            | -1.509           | -1.252 | P                | 2433.061  | P                 | 854.770      | P                 | 2036.470     | LOC_Os02g37060.1 |
| DG <sub>HP</sub> | Os002058_01        | S6            | 0.000            | -0.895 | P                | 183.564   | P                 | 147.513      | P                 | 274.390      | LOC_Os07g38790.1 |
| DG <sub>HP</sub> | Os002325_01        | S6            | -1.467           | 0.000  | P                | 2633.235  | P                 | 952.566      | P                 | 1151.093     | LOC_Os09g38750.1 |
| DG <sub>HP</sub> | Os002353_01        | S6            | 0.000            | -1.449 | P                | 337.468   | P                 | 569.621      | P                 | 1554.653     | LOC_Os03g38470.1 |

|                  |             |    |        |        |   |          |   |          |   |          |                  |
|------------------|-------------|----|--------|--------|---|----------|---|----------|---|----------|------------------|
| DG <sub>HP</sub> | Os002360_01 | S6 | -1.301 | 0.000  | P | 980.832  | P | 398.143  | P | 617.984  | LOC_Os01g72260.1 |
| DG <sub>HP</sub> | Os002390_01 | S6 | -1.743 | 0.000  | P | 2163.016 | P | 646.358  | P | 761.834  | LOC_Os07g05360.1 |
| DG <sub>HP</sub> | Os002417_01 | S6 | -1.002 | 10.000 | P | 377.206  | P | 188.300  | A | 110.693  | LOC_Os06g10780.1 |
| DG <sub>HP</sub> | Os002532_01 | S6 | 0.990  | 0.000  | P | 179.319  | P | 356.120  | P | 249.596  | LOC_Os03g60260.1 |
| DG <sub>HP</sub> | Os002648_01 | S6 | -1.029 | 0.000  | P | 9020.910 | P | 4419.306 | P | 7505.961 | LOC_Os08g32060.1 |
| DG <sub>HP</sub> | Os002678_01 | S6 | -1.414 | 0.880  | P | 3326.571 | P | 1248.755 | P | 678.329  | LOC_Os05g03920.1 |
| DG <sub>HP</sub> | Os002743_01 | S6 | -1.172 | 0.000  | P | 519.197  | P | 230.432  | P | 335.950  | LOC_Os03g28080.1 |
| DG <sub>HP</sub> | Os002866_01 | S6 | 0.000  | 1.186  | P | 806.925  | P | 637.596  | P | 280.316  | LOC_Os03g57690.1 |
| DG <sub>HP</sub> | Os002918_01 | S6 | 0.000  | -0.866 | P | 952.518  | P | 681.060  | P | 1241.623 | LOC_Os05g38680.1 |
| DG <sub>HP</sub> | Os002979_01 | S6 | -0.929 | 0.000  | P | 551.147  | P | 289.448  | P | 391.929  | -                |
| DG <sub>HP</sub> | Os003024_01 | S6 | 10.000 | -0.777 | A | 170.085  | P | 697.789  | P | 1196.067 | LOC_Os01g07520.1 |
| DG <sub>HP</sub> | Os003186_01 | S6 | 1.202  | -0.792 | P | 372.858  | P | 857.922  | P | 1485.322 | LOC_Os05g46780.1 |
| DG <sub>HP</sub> | Os003424_01 | S6 | 0.000  | 1.042  | P | 484.028  | P | 312.263  | P | 151.679  | LOC_Os12g29550.1 |
| DG <sub>HP</sub> | Os003691_01 | S6 | 0.000  | -0.785 | P | 1462.657 | P | 1632.120 | P | 2813.177 | LOC_Os12g31460.1 |
| DG <sub>HP</sub> | Os003776_01 | S6 | 0.938  | 0.000  | P | 2700.149 | P | 5172.519 | P | 4819.137 | LOC_Os12g38290.1 |
| DG <sub>HP</sub> | Os003879_01 | S6 | 1.077  | 0.000  | P | 354.477  | P | 747.907  | P | 517.021  | LOC_Os02g30110.1 |
| DG <sub>HP</sub> | Os003956_02 | S6 | -1.044 | 10.000 | P | 357.634  | P | 173.476  | A | 93.235   | -                |
| DG <sub>HP</sub> | Os004287_01 | S6 | 0.000  | 1.008  | P | 270.357  | P | 228.281  | P | 113.508  | LOC_Os03g28140.1 |
| DG <sub>HP</sub> | Os004399_01 | S6 | -1.517 | 10.000 | P | 1889.798 | P | 660.314  | A | 62.993   | LOC_Os02g40180.1 |
| DG <sub>HP</sub> | Os004406_01 | S6 | 0.000  | 0.868  | P | 1392.562 | P | 953.576  | P | 522.635  | LOC_Os09g28390.1 |
| DG <sub>HP</sub> | Os004826_01 | S6 | -1.236 | -0.821 | P | 943.156  | P | 400.432  | P | 707.546  | LOC_Os02g13890.1 |
| DG <sub>HP</sub> | Os006592_01 | S6 | -1.085 | 0.000  | P | 732.091  | P | 345.214  | P | 199.023  | -                |
| DG <sub>HP</sub> | Os006842_01 | S6 | -1.401 | 0.000  | P | 501.646  | P | 190.020  | P | 318.112  | LOC_Os01g45274.4 |
| DG <sub>HP</sub> | Os007273_01 | S6 | -1.094 | 0.000  | P | 501.316  | P | 234.899  | P | 359.118  | LOC_Os03g05920.1 |
| DG <sub>HP</sub> | Os007747_01 | S6 | -1.136 | 0.000  | P | 592.611  | P | 269.625  | P | 216.345  | LOC_Os02g06300.1 |
| DG <sub>HP</sub> | Os008169_01 | S6 | -1.502 | 1.288  | P | 2203.978 | P | 778.315  | P | 318.650  | LOC_Os02g40240.2 |
| DG <sub>HP</sub> | Os008192_01 | S6 | -1.139 | 0.000  | P | 740.190  | P | 336.114  | P | 268.490  | LOC_Os09g24620.1 |
| DG <sub>HP</sub> | Os008199_01 | S6 | -1.349 | 0.000  | P | 535.949  | P | 210.436  | P | 259.243  | LOC_Os11g44990.1 |
| DG <sub>HP</sub> | Os008411_01 | S6 | 0.930  | 1.168  | P | 627.323  | P | 1194.836 | P | 531.610  | LOC_Os09g38560.1 |
| DG <sub>HP</sub> | Os008529_01 | S6 | 1.430  | 0.000  | P | 234.250  | P | 631.368  | P | 808.045  | LOC_Os07g02210.2 |
| DG <sub>HP</sub> | Os008538_01 | S6 | -1.204 | 0.000  | P | 734.371  | P | 318.808  | P | 272.530  | LOC_Os03g18070.1 |

|                  |             |    |        |        |   |          |   |          |   |          |                  |
|------------------|-------------|----|--------|--------|---|----------|---|----------|---|----------|------------------|
| DG <sub>HP</sub> | Os008548_01 | S6 | 2.198  | 2.138  | P | 326.677  | P | 1499.454 | P | 340.662  | LOC_Os03g02190.1 |
| DG <sub>HP</sub> | Os008602_01 | S6 | -1.265 | 0.000  | P | 1066.366 | P | 443.864  | P | 433.111  | LOC_Os05g06920.1 |
| DG <sub>HP</sub> | Os008620_01 | S6 | 0.000  | -0.911 | P | 887.647  | P | 792.749  | P | 1491.093 | LOC_Os02g17920.1 |
| DG <sub>HP</sub> | Os008685_01 | S6 | 0.000  | -1.298 | P | 522.965  | P | 334.402  | P | 822.499  | -                |
| DG <sub>HP</sub> | Os008721_01 | S6 | 0.000  | 0.810  | P | 261.362  | P | 262.743  | P | 149.895  | LOC_Os03g17740.1 |
| DG <sub>HP</sub> | Os008761_01 | S6 | 1.568  | 0.852  | P | 277.192  | P | 821.580  | P | 455.044  | LOC_Os02g32580.1 |
| DG <sub>HP</sub> | Os008805_01 | S6 | 0.000  | 0.973  | P | 329.988  | P | 252.888  | P | 128.820  | -                |
| DG <sub>HP</sub> | Os008866_01 | S6 | -1.042 | 0.000  | P | 663.827  | P | 322.341  | P | 433.367  | LOC_Os10g10180.1 |
| DG <sub>HP</sub> | Os008896_01 | S6 | 0.956  | 0.000  | P | 222.007  | P | 430.685  | P | 616.086  | LOC_Os04g51520.1 |
| DG <sub>HP</sub> | Os008979_01 | S6 | 0.000  | -1.194 | P | 4743.524 | P | 3003.002 | P | 6868.550 | LOC_Os01g17170.1 |
| DG <sub>HP</sub> | Os008980_01 | S6 | -0.948 | 0.000  | P | 877.189  | P | 454.557  | P | 657.515  | LOC_Os08g10450.1 |
| DG <sub>HP</sub> | Os009063_01 | S6 | 0.000  | 1.636  | P | 365.632  | P | 551.532  | P | 177.416  | LOC_Os04g43650.2 |
| DG <sub>HP</sub> | Os009237_01 | S6 | -1.048 | 0.000  | P | 856.135  | P | 414.058  | P | 501.311  | LOC_Os12g08830.1 |
| DG <sub>HP</sub> | Os009268_01 | S6 | 0.000  | 1.137  | P | 169.835  | P | 310.740  | P | 141.268  | LOC_Os01g43851.1 |
| DG <sub>HP</sub> | Os009377_01 | S6 | -0.916 | 0.000  | P | 651.496  | P | 345.266  | P | 262.607  | LOC_Os12g12580.1 |
| DG <sub>HP</sub> | Os009448_01 | S6 | -1.081 | 0.000  | P | 2503.818 | P | 1183.162 | P | 1892.630 | LOC_Os08g02630.1 |
| DG <sub>HP</sub> | Os009532_01 | S6 | 0.000  | -1.007 | P | 2109.952 | P | 1899.473 | P | 3818.349 | LOC_Os07g08030.1 |
| DG <sub>HP</sub> | Os009556_01 | S6 | 0.000  | 0.938  | P | 3686.721 | P | 4565.590 | P | 2383.468 | LOC_Os03g59320.1 |
| DG <sub>HP</sub> | Os009558_01 | S6 | -1.146 | 0.000  | P | 377.090  | P | 170.367  | P | 248.840  | LOC_Os06g49160.1 |
| DG <sub>HP</sub> | Os009604_01 | S6 | 0.000  | 1.227  | P | 535.732  | P | 525.105  | P | 224.302  | LOC_Os07g43810.1 |
| DG <sub>HP</sub> | Os009631_01 | S6 | 1.137  | 0.000  | P | 204.124  | P | 448.778  | P | 332.140  | LOC_Os12g04150.1 |
| DG <sub>HP</sub> | Os009705_01 | S6 | 1.160  | 0.000  | P | 408.486  | P | 912.777  | P | 538.223  | LOC_Os03g05280.1 |
| DG <sub>HP</sub> | Os009738_01 | S6 | 0.000  | 0.992  | P | 644.184  | P | 961.023  | P | 483.085  | LOC_Os11g34720.1 |
| DG <sub>HP</sub> | Os009787_01 | S6 | 2.293  | 0.000  | P | 440.810  | P | 2160.500 | P | 3364.262 | LOC_Os07g23120.1 |
| DG <sub>HP</sub> | Os009800_01 | S6 | 0.000  | 0.912  | P | 232.516  | P | 254.712  | P | 135.325  | LOC_Os03g54050.1 |
| DG <sub>HP</sub> | Os009844_01 | S6 | -1.008 | 0.000  | P | 6854.300 | P | 3407.674 | P | 2957.533 | LOC_Os12g08730.1 |
| DG <sub>HP</sub> | Os009881_01 | S6 | 1.233  | 0.000  | P | 266.157  | P | 625.522  | P | 856.858  | LOC_Os06g05180.1 |
| DG <sub>HP</sub> | Os009883_01 | S6 | -1.035 | -1.153 | P | 5223.447 | P | 2548.624 | P | 5665.987 | LOC_Os02g51080.1 |
| DG <sub>HP</sub> | Os009986_01 | S6 | 0.957  | 1.090  | P | 672.310  | P | 1305.369 | P | 613.267  | -                |
| DG <sub>HP</sub> | Os010031_01 | S6 | 1.056  | 0.000  | P | 413.266  | P | 859.284  | P | 715.063  | LOC_Os11g18940.1 |
| DG <sub>HP</sub> | Os010073_01 | S6 | 0.000  | -1.347 | P | 220.344  | P | 385.421  | P | 980.525  | LOC_Os07g40986.1 |

|                  |             |    |        |        |   |          |   |          |   |          |                  |
|------------------|-------------|----|--------|--------|---|----------|---|----------|---|----------|------------------|
| DG <sub>HP</sub> | Os010109_01 | S6 | -1.023 | 0.000  | P | 1198.272 | P | 589.626  | P | 994.379  | LOC_Os02g55060.2 |
| DG <sub>HP</sub> | Os010115_01 | S6 | -1.103 | 0.000  | P | 573.229  | P | 266.957  | P | 373.354  | LOC_Os09g36040.1 |
| DG <sub>HP</sub> | Os010135_01 | S6 | 0.000  | -0.854 | P | 135.155  | P | 152.700  | P | 276.089  | -                |
| DG <sub>HP</sub> | Os010136_01 | S6 | 0.000  | 1.755  | P | 1439.671 | P | 1020.808 | P | 302.425  | LOC_Os11g06730.1 |
| DG <sub>HP</sub> | Os010171_01 | S6 | 0.000  | 1.367  | P | 225.578  | P | 300.730  | P | 116.627  | -                |
| DG <sub>HP</sub> | Os010179_01 | S6 | -0.955 | 0.000  | P | 250.825  | P | 129.370  | P | 137.200  | LOC_Os09g30410.1 |
| DG <sub>HP</sub> | Os010486_01 | S6 | 0.000  | 0.883  | P | 218.180  | P | 358.602  | P | 194.431  | -                |
| DG <sub>HP</sub> | Os010501_01 | S6 | -0.918 | 0.000  | P | 923.602  | P | 488.845  | P | 369.995  | LOC_Os09g26670.1 |
| DG <sub>HP</sub> | Os010507_01 | S6 | 0.000  | 1.070  | P | 323.859  | P | 291.929  | P | 139.039  | -                |
| DG <sub>HP</sub> | Os010517_01 | S6 | 0.000  | -0.803 | P | 259.324  | P | 193.958  | P | 338.375  | LOC_Os08g16830.1 |
| DG <sub>HP</sub> | Os010586_01 | S6 | -0.930 | 0.000  | P | 2798.318 | P | 1468.446 | P | 2350.452 | LOC_Os10g41720.1 |
| DG <sub>HP</sub> | Os010653_01 | S6 | 0.987  | 0.000  | P | 166.376  | P | 329.665  | P | 291.379  | LOC_Os12g44180.1 |
| DG <sub>HP</sub> | Os010677_01 | S6 | 0.000  | 0.867  | P | 485.746  | P | 389.659  | P | 213.642  | -                |
| DG <sub>HP</sub> | Os010804_01 | S6 | 1.061  | 0.000  | P | 568.235  | P | 1185.553 | P | 919.614  | LOC_Os02g54140.1 |
| DG <sub>HP</sub> | Os010883_01 | S6 | 1.459  | 1.344  | P | 179.242  | P | 492.655  | P | 194.133  | LOC_Os03g19290.1 |
| DG <sub>HP</sub> | Os010912_01 | S6 | 0.000  | 1.503  | P | 468.809  | P | 663.254  | P | 233.965  | LOC_Os06g23870.1 |
| DG <sub>HP</sub> | Os010924_01 | S6 | 1.406  | 1.758  | P | 869.874  | P | 2305.016 | P | 681.592  | LOC_Os09g39940.1 |
| DG <sub>HP</sub> | Os010942_01 | S6 | 1.143  | 1.212  | P | 883.619  | P | 1951.001 | P | 842.289  | LOC_Os06g44180.1 |
| DG <sub>HP</sub> | Os010946_01 | S6 | 0.000  | -0.931 | P | 231.803  | P | 143.846  | P | 274.223  | LOC_Os03g17200.1 |
| DG <sub>HP</sub> | Os010947_01 | S6 | 0.000  | 1.114  | P | 551.844  | P | 374.926  | P | 173.265  | -                |
| DG <sub>HP</sub> | Os011001_01 | S6 | 1.033  | 1.074  | P | 409.850  | P | 838.444  | P | 398.333  | LOC_Os05g46480.4 |
| DG <sub>HP</sub> | Os011079_01 | S6 | 0.000  | 1.251  | P | 300.241  | P | 295.483  | P | 124.111  | LOC_Os04g45920.1 |
| DG <sub>HP</sub> | Os011090_01 | S6 | 0.000  | 1.080  | P | 584.649  | P | 413.298  | P | 195.443  | LOC_Os04g31140.1 |
| DG <sub>HP</sub> | Os011207_01 | S6 | 1.161  | 0.000  | P | 108.249  | P | 241.984  | P | 258.058  | LOC_Os02g16620.1 |
| DG <sub>HP</sub> | Os011344_01 | S6 | 0.000  | 1.449  | P | 1388.352 | P | 1079.997 | P | 395.489  | -                |
| DG <sub>HP</sub> | Os011754_01 | S6 | 1.083  | 0.000  | P | 114.759  | P | 243.039  | P | 205.882  | LOC_Os05g09380.3 |
| DG <sub>HP</sub> | Os011816_01 | S6 | -1.480 | 0.000  | P | 651.060  | P | 233.381  | P | 204.388  | -                |
| DG <sub>HP</sub> | Os011915_01 | S6 | 0.000  | -0.959 | P | 373.203  | P | 349.342  | P | 679.340  | LOC_Os05g49800.1 |
| DG <sub>HP</sub> | Os011997_01 | S6 | 1.061  | 10.000 | P | 143.615  | P | 299.644  | A | 329.856  | LOC_Os10g32348.1 |
| DG <sub>HP</sub> | Os012005_01 | S6 | 0.000  | 1.010  | P | 465.087  | P | 384.773  | P | 191.079  | LOC_Os03g58640.1 |
| DG <sub>HP</sub> | Os012023_01 | S6 | 0.000  | 1.266  | P | 245.150  | P | 323.080  | P | 134.375  | LOC_Os02g14770.3 |



|                  |             |    |        |        |   |           |   |           |   |           |                  |
|------------------|-------------|----|--------|--------|---|-----------|---|-----------|---|-----------|------------------|
| DG <sub>HP</sub> | Os012086_01 | S6 | -1.243 | -0.783 | P | 1083.916  | P | 458.010   | P | 788.367   | LOC_Os06g44890.1 |
| DG <sub>HP</sub> | Os012098_01 | S6 | -1.003 | 10.000 | P | 336.642   | P | 168.009   | A | 126.357   | LOC_Os08g38990.3 |
| DG <sub>HP</sub> | Os012135_01 | S6 | 0.000  | 1.036  | P | 310.727   | P | 325.674   | P | 158.814   | LOC_Os04g35280.1 |
| DG <sub>HP</sub> | Os012205_01 | S6 | 0.000  | -1.194 | P | 205.011   | P | 277.114   | P | 633.832   | LOC_Os01g74650.3 |
| DG <sub>HP</sub> | Os012299_01 | S6 | 0.000  | -0.880 | P | 375.103   | P | 667.581   | P | 1228.373  | LOC_Os09g38030.1 |
| DG <sub>HP</sub> | Os012329_01 | S6 | 0.000  | -1.291 | P | 404.274   | P | 675.408   | P | 1652.665  | LOC_Os03g34040.1 |
| DG <sub>HP</sub> | Os012343_01 | S6 | 0.992  | 0.000  | P | 222.027   | P | 441.652   | P | 438.207   | LOC_Os02g46460.1 |
| DG <sub>HP</sub> | Os012369_01 | S6 | 1.184  | 0.000  | P | 177.033   | P | 402.201   | P | 251.406   | LOC_Os10g07229.1 |
| DG <sub>HP</sub> | Os012444_01 | S6 | 0.000  | 0.805  | P | 176.047   | P | 232.380   | P | 132.988   | LOC_Os03g21030.1 |
| DG <sub>HP</sub> | Os012465_01 | S6 | 0.000  | 0.906  | P | 304.002   | P | 435.617   | P | 232.521   | LOC_Os02g46962.3 |
| DG <sub>HP</sub> | Os012472_01 | S6 | 0.000  | 1.024  | P | 301.973   | P | 514.365   | P | 252.885   | LOC_Os02g35190.2 |
| DG <sub>HP</sub> | Os012547_01 | S6 | -0.964 | 0.000  | P | 1317.752  | P | 675.549   | P | 773.507   | LOC_Os02g10350.1 |
| DG <sub>HP</sub> | Os012869_01 | S6 | -1.652 | -0.855 | P | 829.210   | P | 263.785   | P | 477.116   | LOC_Os02g08230.1 |
| DG <sub>HP</sub> | Os012915_01 | S6 | 0.000  | 0.868  | P | 593.400   | P | 384.083   | P | 210.492   | LOC_Os01g61970.1 |
| DG <sub>HP</sub> | Os013023_01 | S6 | 1.088  | 0.000  | P | 213.387   | P | 453.671   | P | 316.339   | LOC_Os06g24730.1 |
| DG <sub>HP</sub> | Os013150_01 | S6 | 0.000  | 0.863  | P | 224.440   | P | 194.698   | P | 107.060   | -                |
| DG <sub>HP</sub> | Os013232_01 | S6 | 0.000  | -0.925 | P | 3312.898  | P | 3125.074  | P | 5933.504  | LOC_Os03g56280.1 |
| DG <sub>HP</sub> | Os013267_01 | S6 | -0.934 | 0.000  | P | 1165.929  | P | 610.175   | P | 351.850   | LOC_Os02g29550.2 |
| DG <sub>HP</sub> | Os013283_01 | S6 | 0.000  | -0.853 | P | 268.135   | P | 184.195   | P | 332.807   | LOC_Os05g33280.1 |
| DG <sub>HP</sub> | Os013284_01 | S6 | 0.000  | -0.997 | P | 527.015   | P | 707.241   | P | 1412.009  | LOC_Os09g28630.1 |
| DG <sub>HP</sub> | Os013356_01 | S6 | 10.000 | -1.314 | A | 80.158    | P | 227.187   | P | 564.782   | LOC_Os07g40974.1 |
| DG <sub>HP</sub> | Os013388_01 | S6 | 0.000  | 0.822  | P | 2368.781  | P | 2581.667  | P | 1460.468  | LOC_Os01g07120.2 |
| DG <sub>HP</sub> | Os013389_01 | S6 | 0.000  | 0.978  | P | 579.333   | P | 835.772   | P | 424.167   | LOC_Os09g36220.1 |
| DG <sub>HP</sub> | Os013398_01 | S6 | -1.142 | -0.839 | P | 889.810   | P | 403.279   | P | 721.401   | LOC_Os03g20700.2 |
| DG <sub>HP</sub> | Os013494_01 | S6 | 0.000  | -0.767 | P | 752.844   | P | 742.187   | P | 1263.160  | LOC_Os04g21790.1 |
| DG <sub>HP</sub> | Os013529_01 | S6 | 0.000  | 0.903  | P | 368.025   | P | 423.039   | P | 226.262   | -                |
| DG <sub>HP</sub> | Os013532_01 | S6 | -1.101 | 1.014  | P | 1491.245  | P | 695.359   | P | 344.342   | LOC_Os01g55094.2 |
| DG <sub>HP</sub> | Os013619_01 | S6 | -1.062 | 0.000  | P | 439.775   | P | 210.699   | P | 173.962   | -                |
| DG <sub>HP</sub> | Os013668_01 | S6 | 0.945  | 0.000  | P | 124.937   | P | 240.464   | P | 300.958   | LOC_Os03g42900.1 |
| DG <sub>HP</sub> | Os013712_01 | S6 | -1.049 | -0.882 | P | 24514.019 | P | 11848.624 | P | 21842.493 | LOC_Os09g26810.1 |
| DG <sub>HP</sub> | Os013775_01 | S6 | 0.000  | -0.821 | P | 151.131   | P | 178.407   | P | 315.202   | LOC_Os01g48930.1 |

|                  |             |    |        |        |   |          |   |          |   |          |                  |
|------------------|-------------|----|--------|--------|---|----------|---|----------|---|----------|------------------|
| DG <sub>HP</sub> | Os013863_01 | S6 | 0.952  | 10.000 | P | 95.654   | P | 185.090  | A | 198.743  | LOC_Os01g07700.3 |
| DG <sub>HP</sub> | Os013891_01 | S6 | 1.098  | 0.000  | P | 134.613  | P | 288.161  | P | 256.561  | LOC_Os12g18110.1 |
| DG <sub>HP</sub> | Os013937_01 | S6 | -0.908 | 0.000  | P | 881.349  | P | 469.541  | P | 550.830  | LOC_Os05g07860.1 |
| DG <sub>HP</sub> | Os013987_01 | S6 | 0.971  | -0.898 | P | 187.089  | P | 366.852  | P | 683.656  | LOC_Os08g01170.1 |
| DG <sub>HP</sub> | Os014048_01 | S6 | -0.952 | 0.000  | P | 348.720  | P | 180.306  | P | 167.442  | LOC_Os07g29240.1 |
| DG <sub>HP</sub> | Os014072_01 | S6 | -1.018 | 0.000  | P | 592.917  | P | 292.799  | P | 378.734  | LOC_Os01g46760.1 |
| DG <sub>HP</sub> | Os014249_01 | S6 | -1.062 | 0.000  | P | 498.698  | P | 238.858  | P | 325.112  | LOC_Os06g28194.1 |
| DG <sub>HP</sub> | Os014269_01 | S6 | 0.000  | -1.151 | P | 680.864  | P | 417.218  | P | 926.681  | LOC_Os01g68450.1 |
| DG <sub>HP</sub> | Os014273_01 | S6 | -1.749 | 0.000  | P | 551.005  | P | 163.928  | P | 229.283  | LOC_Os03g48030.1 |
| DG <sub>HP</sub> | Os014285_01 | S6 | 0.000  | -0.840 | P | 619.683  | P | 459.815  | P | 823.074  | LOC_Os08g14440.2 |
| DG <sub>HP</sub> | Os014301_01 | S6 | 0.939  | 0.000  | P | 625.955  | P | 1200.455 | P | 1776.184 | -                |
| DG <sub>HP</sub> | Os014320_01 | S6 | -0.928 | 0.000  | P | 827.872  | P | 435.062  | P | 388.942  | LOC_Os03g17570.3 |
| DG <sub>HP</sub> | Os014374_01 | S6 | -0.994 | 1.049  | P | 999.954  | P | 502.037  | P | 242.618  | LOC_Os10g26990.1 |
| DG <sub>HP</sub> | Os014410_01 | S6 | 0.000  | -0.899 | P | 465.395  | P | 381.940  | P | 711.988  | LOC_Os08g23410.1 |
| DG <sub>HP</sub> | Os014490_01 | S6 | 0.000  | 0.859  | P | 372.183  | P | 234.492  | P | 129.326  | LOC_Os02g13100.1 |
| DG <sub>HP</sub> | Os014505_01 | S6 | 0.000  | 1.152  | P | 341.148  | P | 566.039  | P | 254.630  | LOC_Os03g37830.1 |
| DG <sub>HP</sub> | Os014533_01 | S6 | 1.126  | 0.000  | P | 148.987  | P | 325.082  | P | 343.906  | LOC_Os07g37650.1 |
| DG <sub>HP</sub> | Os014740_01 | S6 | -1.126 | -2.222 | P | 1109.617 | P | 508.547  | P | 2371.947 | LOC_Os07g36080.1 |
| DG <sub>HP</sub> | Os014988_01 | S6 | 0.000  | 0.886  | P | 251.811  | P | 405.429  | P | 219.421  | LOC_Os12g09300.1 |
| DG <sub>HP</sub> | Os015156_01 | S6 | -1.139 | 0.000  | P | 1022.210 | P | 464.119  | P | 296.108  | LOC_Os01g08460.1 |
| DG <sub>HP</sub> | Os015744_01 | S6 | -0.932 | 0.000  | P | 1561.075 | P | 818.017  | P | 535.428  | LOC_Os04g54790.1 |
| DG <sub>HP</sub> | Os015774_01 | S6 | 0.000  | -0.771 | P | 195.091  | P | 182.865  | P | 312.107  | LOC_Os05g34010.1 |
| DG <sub>HP</sub> | Os015775_01 | S6 | 0.000  | -0.827 | P | 341.490  | P | 204.880  | P | 363.354  | LOC_Os07g23410.2 |
| DG <sub>HP</sub> | Os015790_01 | S6 | 1.166  | 1.182  | P | 572.255  | P | 1283.817 | P | 565.863  | -                |
| DG <sub>HP</sub> | Os015845_01 | S6 | 1.060  | 0.000  | P | 128.349  | P | 267.551  | P | 403.723  | LOC_Os05g03550.1 |
| DG <sub>HP</sub> | Os015868_01 | S6 | 1.145  | 10.000 | P | 140.018  | P | 309.712  | A | 156.144  | LOC_Os03g13540.1 |
| DG <sub>HP</sub> | Os016064_01 | S6 | 1.014  | 1.142  | P | 182.525  | P | 368.595  | P | 167.019  | LOC_Os03g59180.2 |
| DG <sub>HP</sub> | Os016108_01 | S6 | 0.000  | 0.805  | P | 542.009  | P | 322.881  | P | 184.777  | LOC_Os03g52720.1 |
| DG <sub>HP</sub> | Os016131_01 | S6 | 0.000  | 0.821  | P | 419.515  | P | 365.201  | P | 206.669  | LOC_Os07g42500.1 |
| DG <sub>HP</sub> | Os016155_01 | S6 | 0.000  | 1.024  | P | 550.476  | P | 615.058  | P | 302.524  | LOC_Os02g57600.1 |
| DG <sub>HP</sub> | Os016218_01 | S6 | 0.000  | -1.061 | P | 514.991  | P | 531.565  | P | 1109.134 | LOC_Os03g53300.2 |

|                  |             |    |        |        |   |          |   |          |   |          |                  |
|------------------|-------------|----|--------|--------|---|----------|---|----------|---|----------|------------------|
| DG <sub>HP</sub> | Os016235_01 | S6 | 0.000  | 0.914  | P | 330.009  | P | 374.614  | P | 198.809  | LOC_Os02g58150.2 |
| DG <sub>HP</sub> | Os016238_01 | S6 | -1.055 | 10.000 | P | 451.334  | P | 217.169  | A | 109.435  | LOC_Os08g35740.1 |
| DG <sub>HP</sub> | Os016284_01 | S6 | 0.000  | 0.860  | P | 788.997  | P | 521.527  | P | 287.310  | LOC_Os05g34650.1 |
| DG <sub>HP</sub> | Os016615_01 | S6 | 0.000  | -0.813 | P | 1181.221 | P | 1032.525 | P | 1814.283 | LOC_Os11g05050.2 |
| DG <sub>HP</sub> | Os016657_01 | S6 | 0.000  | 0.870  | P | 1460.167 | P | 1677.296 | P | 917.753  | LOC_Os01g50200.1 |
| DG <sub>HP</sub> | Os016661_01 | S6 | 0.000  | -0.879 | P | 318.345  | P | 253.186  | P | 465.488  | LOC_Os08g25734.1 |
| DG <sub>HP</sub> | Os016758_01 | S6 | 1.431  | 0.000  | P | 176.360  | P | 475.604  | P | 466.157  | LOC_Os11g32110.4 |
| DG <sub>HP</sub> | Os016770_01 | S6 | -1.050 | 1.136  | P | 984.028  | P | 475.169  | P | 216.228  | LOC_Os07g30760.2 |
| DG <sub>HP</sub> | Os016790_01 | S6 | 0.000  | 1.245  | P | 529.984  | P | 354.435  | P | 149.562  | LOC_Os04g38220.1 |
| DG <sub>HP</sub> | Os016793_01 | S6 | 0.000  | 0.828  | P | 222.747  | P | 281.011  | P | 158.303  | LOC_Os02g52780.1 |
| DG <sub>HP</sub> | Os016859_01 | S6 | 0.000  | -0.961 | P | 296.773  | P | 359.705  | P | 700.395  | LOC_Os05g37520.1 |
| DG <sub>HP</sub> | Os016867_01 | S6 | -1.170 | 0.000  | P | 575.147  | P | 255.553  | P | 319.067  | LOC_Os08g43390.1 |
| DG <sub>HP</sub> | Os016869_01 | S6 | 0.000  | 1.121  | P | 2734.130 | P | 2560.072 | P | 1177.047 | LOC_Os01g08700.6 |
| DG <sub>HP</sub> | Os016870_01 | S6 | 0.000  | 0.856  | P | 721.178  | P | 455.638  | P | 251.757  | LOC_Os02g56280.1 |
| DG <sub>HP</sub> | Os016882_01 | S6 | 0.000  | 0.918  | P | 204.741  | P | 293.189  | P | 155.188  | LOC_Os08g39370.1 |
| DG <sub>HP</sub> | Os016916_01 | S6 | 10.000 | 1.020  | A | 87.601   | P | 281.765  | P | 138.905  | LOC_Os03g05390.6 |
| DG <sub>HP</sub> | Os016919_01 | S6 | 1.885  | 1.831  | P | 1172.479 | P | 4330.277 | P | 1217.126 | LOC_Os02g01590.1 |
| DG <sub>HP</sub> | Os016972_01 | S6 | 1.590  | 0.000  | P | 137.903  | P | 415.018  | P | 615.133  | LOC_Os12g20150.1 |
| DG <sub>HP</sub> | Os017058_01 | S6 | 1.347  | 0.000  | P | 377.466  | P | 960.075  | P | 962.362  | LOC_Os05g33940.1 |
| DG <sub>HP</sub> | Os017063_01 | S6 | 0.963  | 0.000  | P | 104.792  | P | 204.314  | P | 247.870  | LOC_Os02g34840.1 |
| DG <sub>HP</sub> | Os017149_01 | S6 | 0.000  | -0.889 | P | 1427.068 | P | 1394.480 | P | 2582.033 | LOC_Os03g01030.1 |
| DG <sub>HP</sub> | Os017238_01 | S6 | 0.000  | 0.903  | P | 407.786  | P | 479.260  | P | 256.248  | LOC_Os07g01820.1 |
| DG <sub>HP</sub> | Os017372_01 | S6 | -0.913 | 0.000  | P | 494.575  | P | 262.604  | P | 192.521  | LOC_Os11g45720.1 |
| DG <sub>HP</sub> | Os017376_01 | S6 | 1.239  | 0.000  | P | 319.155  | P | 753.139  | P | 531.473  | LOC_Os07g48100.1 |
| DG <sub>HP</sub> | Os017409_01 | S6 | -0.984 | 0.000  | P | 3956.018 | P | 2000.162 | P | 1973.130 | LOC_Os12g01449.1 |
| DG <sub>HP</sub> | Os017440_01 | S6 | 0.000  | -0.819 | P | 239.385  | P | 231.268  | P | 407.985  | LOC_Os10g01134.1 |
| DG <sub>HP</sub> | Os017442_01 | S6 | -0.971 | -0.861 | P | 2229.610 | P | 1137.636 | P | 2065.961 | LOC_Os02g20860.1 |
| DG <sub>HP</sub> | Os017640_01 | S6 | -1.341 | 0.000  | P | 1304.653 | P | 515.167  | P | 821.293  | LOC_Os05g22614.1 |
| DG <sub>HP</sub> | Os017690_01 | S6 | 0.000  | 0.909  | P | 9479.017 | P | 9279.485 | P | 4942.753 | LOC_Os07g01020.1 |
| DG <sub>HP</sub> | Os017692_01 | S6 | 0.000  | 0.896  | P | 128.591  | P | 242.817  | P | 130.450  | -                |
| DG <sub>HP</sub> | Os017820_01 | S6 | 0.000  | -0.772 | P | 275.540  | P | 388.539  | P | 663.287  | LOC_Os04g36062.1 |

|                  |             |    |        |        |   |          |   |          |   |          |                  |
|------------------|-------------|----|--------|--------|---|----------|---|----------|---|----------|------------------|
| DG <sub>HP</sub> | Os017944_01 | S6 | -1.282 | -0.846 | P | 5172.282 | P | 2127.702 | P | 3824.578 | LOC_Os04g18090.1 |
| DG <sub>HP</sub> | Os017954_01 | S6 | 0.998  | 0.000  | P | 187.351  | P | 374.246  | P | 330.098  | LOC_Os08g04840.1 |
| DG <sub>HP</sub> | Os017967_01 | S6 | 0.000  | -0.836 | P | 208.349  | P | 206.487  | P | 368.702  | LOC_Os05g49880.1 |
| DG <sub>HP</sub> | Os018024_01 | S6 | 0.000  | -0.788 | P | 193.549  | P | 165.432  | P | 285.628  | LOC_Os03g11960.1 |
| DG <sub>HP</sub> | Os018042_01 | S6 | 0.000  | 0.931  | P | 624.750  | P | 694.218  | P | 364.002  | LOC_Os02g42940.1 |
| DG <sub>HP</sub> | Os018072_01 | S6 | 1.907  | -0.786 | P | 151.710  | P | 569.134  | P | 981.595  | LOC_Os05g46250.1 |
| DG <sub>HP</sub> | Os018085_01 | S6 | 10.000 | 0.869  | A | 128.424  | P | 267.379  | P | 146.404  | LOC_Os01g65660.1 |
| DG <sub>HP</sub> | Os018086_01 | S6 | 1.014  | 1.063  | P | 336.137  | P | 678.782  | P | 324.802  | -                |
| DG <sub>HP</sub> | Os018138_01 | S6 | 0.000  | -0.830 | P | 301.788  | P | 223.753  | P | 397.801  | LOC_Os10g36000.2 |
| DG <sub>HP</sub> | Os018190_01 | S6 | 0.984  | 0.000  | P | 127.063  | P | 251.368  | P | 238.864  | LOC_Os01g43700.2 |
| DG <sub>HP</sub> | Os018214_01 | S6 | 0.952  | 0.000  | P | 114.819  | P | 222.174  | P | 301.070  | LOC_Os08g12750.2 |
| DG <sub>HP</sub> | Os018256_01 | S6 | 0.000  | -1.081 | P | 2039.636 | P | 1297.562 | P | 2744.191 | LOC_Os04g53230.1 |
| DG <sub>HP</sub> | Os018324_01 | S6 | 1.002  | 0.000  | P | 188.865  | P | 378.313  | P | 317.784  | LOC_Os06g01250.1 |
| DG <sub>HP</sub> | Os018327_01 | S6 | 0.920  | 0.000  | P | 192.496  | P | 364.222  | P | 427.037  | LOC_Os12g05650.1 |
| DG <sub>HP</sub> | Os018378_01 | S6 | 0.000  | -0.960 | P | 667.122  | P | 712.051  | P | 1385.029 | LOC_Os08g02210.2 |
| DG <sub>HP</sub> | Os018414_01 | S6 | -1.013 | 10.000 | P | 292.532  | P | 144.904  | A | 102.585  | LOC_Os07g28910.1 |
| DG <sub>HP</sub> | Os018432_01 | S6 | 1.050  | 0.000  | P | 146.083  | P | 302.567  | P | 313.947  | LOC_Os08g42420.5 |
| DG <sub>HP</sub> | Os018710_01 | S6 | 0.000  | 1.051  | P | 395.592  | P | 702.005  | P | 338.831  | LOC_Os09g09830.1 |
| DG <sub>HP</sub> | Os018766_01 | S6 | -1.297 | 0.000  | P | 1153.050 | P | 469.203  | P | 350.216  | LOC_Os04g40670.1 |
| DG <sub>HP</sub> | Os018767_01 | S6 | 0.000  | 1.114  | P | 660.787  | P | 524.051  | P | 242.064  | LOC_Os04g32050.1 |
| DG <sub>HP</sub> | Os018786_01 | S6 | 0.000  | 1.465  | P | 1034.521 | P | 930.932  | P | 337.181  | LOC_Os03g16670.1 |
| DG <sub>HP</sub> | Os018818_01 | S6 | -1.193 | 1.114  | P | 1417.543 | P | 620.230  | P | 286.456  | -                |
| DG <sub>HP</sub> | Os018960_01 | S6 | 0.000  | -0.787 | P | 4576.879 | P | 3054.315 | P | 5270.174 | LOC_Os03g52840.1 |
| DG <sub>HP</sub> | Os018965_01 | S6 | 0.000  | 0.823  | P | 512.183  | P | 470.546  | P | 265.989  | LOC_Os03g62200.1 |
| DG <sub>HP</sub> | Os019237_01 | S6 | 0.000  | 1.097  | P | 4150.430 | P | 4947.263 | P | 2312.654 | LOC_Os01g37690.1 |
| DG <sub>HP</sub> | Os019246_01 | S6 | 1.387  | 10.000 | P | 130.143  | P | 340.427  | A | 500.535  | LOC_Os09g34160.1 |
| DG <sub>HP</sub> | Os019400_01 | S6 | 0.947  | 0.000  | P | 105.320  | P | 203.074  | P | 221.516  | LOC_Os01g70790.1 |
| DG <sub>HP</sub> | Os019413_01 | S6 | -1.437 | 0.000  | P | 672.223  | P | 248.276  | P | 343.785  | LOC_Os07g49110.1 |
| DG <sub>HP</sub> | Os019636_01 | S6 | 0.000  | 0.861  | P | 2736.416 | P | 2636.194 | P | 1451.633 | -                |
| DG <sub>HP</sub> | Os020088_01 | S6 | 0.000  | -0.977 | P | 263.385  | P | 387.207  | P | 762.309  | LOC_Os05g03120.2 |
| DG <sub>HP</sub> | Os020145_01 | S6 | 0.000  | -0.936 | P | 677.248  | P | 538.532  | P | 1030.445 | LOC_Os07g22930.3 |

|                  |             |    |        |        |   |          |   |          |   |          |                  |
|------------------|-------------|----|--------|--------|---|----------|---|----------|---|----------|------------------|
| DG <sub>HP</sub> | Os020363_01 | S6 | 0.000  | 0.907  | P | 316.567  | P | 327.210  | P | 174.495  | LOC_Os02g21260.1 |
| DG <sub>HP</sub> | Os020367_01 | S6 | 0.000  | 1.214  | P | 268.804  | P | 276.903  | P | 119.372  | LOC_Os01g15630.1 |
| DG <sub>HP</sub> | Os020392_01 | S6 | 0.000  | 1.204  | P | 1207.828 | P | 663.678  | P | 288.077  | LOC_Os03g15050.2 |
| DG <sub>HP</sub> | Os020398_01 | S6 | 0.000  | -1.212 | P | 224.163  | P | 250.880  | P | 581.275  | LOC_Os03g54000.1 |
| DG <sub>HP</sub> | Os020616_01 | S6 | 10.000 | -0.872 | A | 118.728  | P | 187.833  | P | 343.724  | LOC_Os02g53140.1 |
| DG <sub>HP</sub> | Os020694_01 | S6 | 1.193  | -0.794 | P | 196.018  | P | 448.155  | P | 776.972  | LOC_Os09g33680.1 |
| DG <sub>HP</sub> | Os020765_01 | S6 | 0.974  | 0.000  | P | 305.109  | P | 599.292  | P | 742.751  | LOC_Os01g09990.1 |
| DG <sub>HP</sub> | Os020903_01 | S6 | 1.153  | 0.000  | P | 1039.572 | P | 2311.785 | P | 1357.474 | LOC_Os03g17870.1 |
| DG <sub>HP</sub> | Os020930_01 | S6 | 1.023  | -0.904 | P | 231.971  | P | 471.289  | P | 881.965  | LOC_Os06g04390.1 |
| DG <sub>HP</sub> | Os020947_01 | S6 | 1.115  | 1.237  | P | 1069.835 | P | 2317.864 | P | 983.278  | LOC_Os03g16500.2 |
| DG <sub>HP</sub> | Os020962_01 | S6 | 0.000  | 0.827  | P | 525.701  | P | 602.260  | P | 339.537  | LOC_Os10g41930.2 |
| DG <sub>HP</sub> | Os021189_01 | S6 | 0.000  | -0.887 | P | 263.809  | P | 294.713  | P | 545.206  | LOC_Os01g69080.1 |
| DG <sub>HP</sub> | Os021254_01 | S6 | 0.000  | -1.095 | P | 170.764  | P | 237.729  | P | 507.779  | LOC_Os02g46660.1 |
| DG <sub>HP</sub> | Os021365_01 | S6 | 0.000  | 0.887  | P | 436.097  | P | 377.059  | P | 203.827  | LOC_Os08g24434.1 |
| DG <sub>HP</sub> | Os021454_01 | S6 | 0.000  | 0.841  | P | 732.604  | P | 914.422  | P | 510.377  | LOC_Os03g37970.1 |
| DG <sub>HP</sub> | Os021455_01 | S6 | 0.000  | 0.860  | P | 716.476  | P | 858.876  | P | 473.189  | LOC_Os03g55820.1 |
| DG <sub>HP</sub> | Os021583_01 | S6 | 0.000  | -0.831 | P | 669.223  | P | 373.162  | P | 663.839  | LOC_Os04g41870.1 |
| DG <sub>HP</sub> | Os021726_01 | S6 | 1.348  | 0.000  | P | 496.722  | P | 1264.868 | P | 1435.566 | LOC_Os03g06080.1 |
| DG <sub>HP</sub> | Os021728_01 | S6 | 0.000  | 1.012  | P | 1474.825 | P | 1585.555 | P | 786.129  | LOC_Os07g23430.1 |
| DG <sub>HP</sub> | Os021757_01 | S6 | 0.000  | 1.188  | P | 616.787  | P | 398.650  | P | 175.002  | LOC_Os09g36740.1 |
| DG <sub>HP</sub> | Os021764_01 | S6 | 0.921  | 0.000  | P | 175.198  | P | 331.663  | P | 259.965  | LOC_Os05g44340.1 |
| DG <sub>HP</sub> | Os021857_01 | S6 | 0.000  | 0.982  | P | 1253.706 | P | 1223.363 | P | 619.419  | LOC_Os10g41200.1 |
| DG <sub>HP</sub> | Os021870_01 | S6 | 0.000  | -1.062 | P | 208.386  | P | 318.358  | P | 664.483  | LOC_Os07g41060.1 |
| DG <sub>HP</sub> | Os021892_01 | S6 | 10.000 | -0.769 | A | 112.733  | P | 147.112  | P | 250.663  | LOC_Os05g07060.1 |
| DG <sub>HP</sub> | Os021926_01 | S6 | -0.928 | 0.000  | P | 2748.225 | P | 1444.895 | P | 1872.876 | LOC_Os12g41920.3 |
| DG <sub>HP</sub> | Os021978_01 | S6 | 0.000  | -0.773 | P | 1539.744 | P | 1127.364 | P | 1925.860 | LOC_Os02g39160.1 |
| DG <sub>HP</sub> | Os022025_01 | S6 | 10.000 | -0.882 | A | 66.199   | P | 194.797  | P | 359.042  | LOC_Os06g34040.1 |
| DG <sub>HP</sub> | Os022043_01 | S6 | -0.934 | 0.000  | P | 1397.498 | P | 731.524  | P | 1086.227 | LOC_Os03g61920.1 |
| DG <sub>HP</sub> | Os022098_01 | S6 | 10.000 | -0.809 | A | 96.792   | P | 180.323  | P | 315.894  | LOC_Os01g31940.1 |
| DG <sub>HP</sub> | Os022158_01 | S6 | 0.000  | 0.840  | P | 203.888  | P | 267.074  | P | 149.156  | LOC_Os01g56470.1 |
| DG <sub>HP</sub> | Os022183_01 | S6 | -1.610 | -0.898 | P | 2919.922 | P | 956.867  | P | 1782.495 | LOC_Os10g40390.1 |

|                  |             |    |        |        |   |          |   |          |   |          |                  |
|------------------|-------------|----|--------|--------|---|----------|---|----------|---|----------|------------------|
| DG <sub>HP</sub> | Os022228_01 | S6 | -0.929 | 0.000  | P | 1696.737 | P | 891.331  | P | 634.722  | LOC_Os10g41250.1 |
| DG <sub>HP</sub> | Os022291_01 | S6 | 0.000  | -0.772 | P | 611.475  | P | 1115.651 | P | 1904.726 | LOC_Os03g16880.1 |
| DG <sub>HP</sub> | Os022309_01 | S6 | 0.000  | -0.768 | P | 377.104  | P | 573.975  | P | 977.547  | LOC_Os05g10670.1 |
| DG <sub>HP</sub> | Os022434_01 | S6 | -1.163 | 0.000  | P | 961.959  | P | 429.466  | P | 424.021  | LOC_Os01g67310.1 |
| DG <sub>HP</sub> | Os022563_01 | S6 | 0.923  | 0.000  | P | 125.587  | P | 238.126  | P | 336.490  | LOC_Os06g04290.1 |
| DG <sub>HP</sub> | Os022620_01 | S6 | 1.119  | 0.000  | P | 260.472  | P | 565.675  | P | 894.493  | LOC_Os10g09930.1 |
| DG <sub>HP</sub> | Os022866_01 | S6 | 0.000  | 0.861  | P | 207.681  | P | 320.507  | P | 176.450  | LOC_Os07g48830.1 |
| DG <sub>HP</sub> | Os022932_01 | S6 | 0.000  | 0.900  | P | 448.205  | P | 579.568  | P | 310.613  | LOC_Os04g44150.1 |
| DG <sub>HP</sub> | Os022954_01 | S6 | 0.000  | 1.118  | P | 606.414  | P | 563.408  | P | 259.663  | LOC_Os08g34170.1 |
| DG <sub>HP</sub> | Os022991_01 | S6 | -1.272 | -1.029 | P | 520.762  | P | 215.623  | P | 440.149  | LOC_Os05g43880.1 |
| DG <sub>HP</sub> | Os023118_01 | S6 | 2.711  | -0.835 | P | 125.070  | P | 819.182  | P | 1461.105 | LOC_Os07g11120.1 |
| DG <sub>HP</sub> | Os023213_01 | S6 | -1.052 | 0.000  | P | 4833.006 | P | 2330.914 | P | 2856.995 | LOC_Os02g32850.1 |
| DG <sub>HP</sub> | Os023233_01 | S6 | 1.045  | 0.000  | P | 559.057  | P | 1153.287 | P | 789.995  | LOC_Os01g69140.1 |
| DG <sub>HP</sub> | Os023350_01 | S6 | -1.225 | 0.000  | P | 3410.538 | P | 1459.112 | P | 998.281  | LOC_Os12g42280.1 |
| DG <sub>HP</sub> | Os023378_01 | S6 | -0.930 | 0.000  | P | 1029.622 | P | 540.408  | P | 698.283  | LOC_Os03g46470.1 |
| DG <sub>HP</sub> | Os023465_01 | S6 | 1.463  | 0.807  | P | 142.604  | P | 393.257  | P | 224.778  | LOC_Os01g37200.1 |
| DG <sub>HP</sub> | Os023508_01 | S6 | 0.000  | 1.079  | P | 2465.441 | P | 3662.309 | P | 1733.776 | LOC_Os08g04430.1 |
| DG <sub>HP</sub> | Os023589_01 | S6 | 1.578  | -0.813 | P | 229.898  | P | 686.599  | P | 1206.528 | LOC_Os05g05650.1 |
| DG <sub>HP</sub> | Os023983_01 | S6 | 1.345  | 0.000  | P | 248.225  | P | 630.516  | P | 953.833  | LOC_Os02g58500.1 |
| DG <sub>HP</sub> | Os023998_01 | S6 | 0.000  | 0.813  | P | 664.980  | P | 361.908  | P | 205.944  | LOC_Os08g42570.1 |
| DG <sub>HP</sub> | Os024035_01 | S6 | 0.000  | -0.941 | P | 870.851  | P | 468.312  | P | 899.400  | LOC_Os10g02300.3 |
| DG <sub>HP</sub> | Os024078_01 | S6 | 0.921  | 0.000  | P | 150.673  | P | 285.228  | P | 366.953  | LOC_Os06g44250.1 |
| DG <sub>HP</sub> | Os024208_01 | S6 | -0.910 | 0.000  | P | 3557.847 | P | 1893.913 | P | 2970.114 | -                |
| DG <sub>HP</sub> | Os024254_01 | S6 | 1.537  | 1.574  | P | 376.548  | P | 1092.543 | P | 367.002  | LOC_Os09g26780.1 |
| DG <sub>HP</sub> | Os024270_01 | S6 | 1.496  | 0.000  | P | 298.722  | P | 842.817  | P | 663.793  | LOC_Os05g36990.1 |
| DG <sub>HP</sub> | Os024437_01 | S6 | -1.054 | 0.000  | P | 1014.893 | P | 488.739  | P | 450.950  | -                |
| DG <sub>HP</sub> | Os024551_01 | S6 | 0.000  | 0.806  | P | 290.594  | P | 278.286  | P | 159.119  | -                |
| DG <sub>HP</sub> | Os024561_01 | S6 | 0.000  | -0.918 | P | 397.277  | P | 526.316  | P | 994.647  | LOC_Os04g01740.1 |
| DG <sub>HP</sub> | Os024616_01 | S6 | 0.000  | 0.900  | P | 508.347  | P | 387.241  | P | 207.485  | -                |
| DG <sub>HP</sub> | Os024625_01 | S6 | 0.000  | 0.857  | P | 181.534  | P | 260.033  | P | 143.535  | LOC_Os08g25080.1 |
| DG <sub>HP</sub> | Os024723_01 | S6 | -1.304 | 0.000  | P | 531.685  | P | 215.405  | P | 181.232  | LOC_Os11g05490.1 |

|                  |             |    |        |        |   |          |   |           |   |           |                  |
|------------------|-------------|----|--------|--------|---|----------|---|-----------|---|-----------|------------------|
| DG <sub>HP</sub> | Os024737_01 | S6 | 1.418  | 1.073  | P | 197.309  | P | 527.148   | P | 250.566   | LOC_Os01g01660.1 |
| DG <sub>HP</sub> | Os024774_01 | S6 | 0.000  | -0.773 | P | 9767.157 | P | 6368.404  | P | 10885.760 | LOC_Os02g10390.1 |
| DG <sub>HP</sub> | Os024778_01 | S6 | 0.949  | 0.000  | P | 140.458  | P | 271.247   | P | 385.018   | LOC_Os05g30800.1 |
| DG <sub>HP</sub> | Os024795_01 | S6 | 0.000  | -1.012 | P | 533.369  | P | 510.550   | P | 1029.885  | LOC_Os08g29170.1 |
| DG <sub>HP</sub> | Os024813_01 | S6 | 0.000  | -0.843 | P | 313.140  | P | 346.527   | P | 621.705   | LOC_Os06g06560.1 |
| DG <sub>HP</sub> | Os024882_01 | S6 | 0.000  | 1.119  | P | 367.303  | P | 371.276   | P | 170.960   | LOC_Os09g31120.1 |
| DG <sub>HP</sub> | Os025052_01 | S6 | 0.000  | -0.785 | P | 570.808  | P | 316.251   | P | 544.808   | LOC_Os01g56570.1 |
| DG <sub>HP</sub> | Os025405_01 | S6 | 0.000  | 2.409  | P | 1136.781 | P | 792.617   | P | 149.203   | LOC_Os10g41960.1 |
| DG <sub>HP</sub> | Os025509_01 | S6 | 1.129  | 1.042  | P | 337.988  | P | 739.289   | P | 359.061   | LOC_Os05g04690.1 |
| DG <sub>HP</sub> | Os025528_01 | S6 | 0.000  | -0.829 | P | 8361.827 | P | 13534.397 | P | 24038.246 | -                |
| DG <sub>HP</sub> | Os025762_01 | S6 | 0.000  | 1.570  | P | 1208.171 | P | 696.465   | P | 234.592   | LOC_Os05g25260.1 |
| DG <sub>HP</sub> | Os025789_01 | S6 | 0.000  | 1.062  | P | 1193.787 | P | 2015.199  | P | 965.318   | -                |
| DG <sub>HP</sub> | Os025815_01 | S6 | 0.986  | 0.000  | P | 154.889  | P | 306.769   | P | 337.772   | LOC_Os01g67410.1 |
| DG <sub>HP</sub> | Os025832_01 | S6 | 1.013  | 0.000  | P | 229.385  | P | 462.773   | P | 500.325   | LOC_Os04g33240.1 |
| DG <sub>HP</sub> | Os025959_01 | S6 | 0.000  | 1.343  | P | 850.488  | P | 753.489   | P | 296.977   | LOC_Os12g43780.1 |
| DG <sub>HP</sub> | Os026125_01 | S6 | 10.000 | -0.800 | A | 106.925  | P | 139.145   | P | 242.232   | LOC_Os03g45779.1 |
| DG <sub>HP</sub> | Os026131_01 | S6 | 10.000 | -1.267 | A | 122.588  | P | 247.322   | P | 595.074   | LOC_Os04g42870.1 |
| DG <sub>HP</sub> | Os026571_01 | S6 | 0.000  | -0.997 | P | 957.403  | P | 622.513   | P | 1242.631  | LOC_Os04g35680.1 |
| DG <sub>HP</sub> | Os026917_01 | S6 | -1.130 | -0.967 | P | 3611.495 | P | 1650.484  | P | 3226.381  | LOC_Os04g52250.1 |
| DG <sub>HP</sub> | Os027044_01 | S6 | -0.929 | 0.000  | P | 3206.800 | P | 1684.374  | P | 2619.757  | LOC_Os09g15830.1 |
| DG <sub>HP</sub> | Os027168_01 | S6 | 1.105  | 0.000  | P | 198.771  | P | 427.423   | P | 334.859   | LOC_Os11g41260.1 |
| DG <sub>HP</sub> | Os027606_01 | S6 | -0.993 | 10.000 | P | 214.555  | P | 107.818   | A | 67.027    | LOC_Os04g51820.1 |
| DG <sub>HP</sub> | Os027640_01 | S6 | -0.912 | 10.000 | P | 279.486  | P | 148.545   | A | 107.059   | LOC_Os01g70440.1 |
| DG <sub>HP</sub> | Os027686_01 | S6 | 0.000  | 1.326  | P | 275.084  | P | 494.843   | P | 197.431   | LOC_Os06g04630.1 |
| DG <sub>HP</sub> | Os027934_01 | S6 | 0.000  | -0.768 | P | 153.762  | P | 203.512   | P | 346.580   | LOC_Os06g06270.1 |
| DG <sub>HP</sub> | Os028052_01 | S6 | -1.123 | -0.842 | P | 1562.659 | P | 717.344   | P | 1286.183  | LOC_Os06g29370.1 |
| DG <sub>HP</sub> | Os028157_01 | S6 | 0.000  | 1.382  | P | 1787.603 | P | 1242.201  | P | 476.647   | LOC_Os10g32110.1 |
| DG <sub>HP</sub> | Os028344_01 | S6 | -1.049 | 10.000 | P | 311.400  | P | 150.512   | A | 94.938    | LOC_Os01g45970.1 |
| DG <sub>HP</sub> | Os028605_01 | S6 | -1.375 | 0.000  | P | 905.647  | P | 349.227   | P | 284.322   | LOC_Os02g06380.1 |
| DG <sub>HP</sub> | Os028624_01 | S6 | 0.941  | 0.000  | P | 3027.486 | P | 5814.242  | P | 8369.570  | LOC_Os06g02010.1 |
| DG <sub>HP</sub> | Os028680_01 | S6 | 1.827  | -1.435 | P | 147.548  | P | 523.601   | P | 1416.101  | LOC_Os07g06100.1 |

|                  |             |    |        |        |   |          |   |          |   |          |                  |
|------------------|-------------|----|--------|--------|---|----------|---|----------|---|----------|------------------|
| DG <sub>HP</sub> | Os028834_01 | S6 | 0.946  | 0.000  | P | 807.996  | P | 1556.477 | P | 1876.090 | LOC_Os03g27070.1 |
| DG <sub>HP</sub> | Os029713_01 | S6 | 0.000  | 1.271  | P | 4651.137 | P | 3760.475 | P | 1557.808 | LOC_Os07g30990.1 |
| DG <sub>HP</sub> | Os029791_01 | S6 | 0.000  | 1.562  | P | 960.327  | P | 630.531  | P | 213.560  | LOC_Os02g52200.1 |
| DG <sub>HP</sub> | Os029902_01 | S6 | 0.000  | 0.966  | P | 919.964  | P | 995.339  | P | 509.414  | LOC_Os09g09850.1 |
| DG <sub>HP</sub> | Os029927_01 | S6 | -0.917 | 0.000  | P | 1047.031 | P | 554.674  | P | 692.005  | LOC_Os03g31210.1 |
| DG <sub>HP</sub> | Os029928_01 | S6 | -1.193 | 0.000  | P | 349.204  | P | 152.778  | P | 137.818  | -                |
| DG <sub>HP</sub> | Os030028_01 | S6 | 1.357  | -1.280 | P | 207.732  | P | 532.262  | P | 1292.912 | LOC_Os01g02710.1 |
| DG <sub>HP</sub> | Os030119_01 | S6 | -0.979 | 0.820  | P | 913.096  | P | 463.162  | P | 262.276  | LOC_Os02g03210.1 |
| DG <sub>HP</sub> | Os030447_01 | S6 | 2.606  | 10.000 | P | 150.190  | P | 914.563  | A | 918.083  | LOC_Os05g06200.1 |
| DG <sub>HP</sub> | Os031090_01 | S6 | -0.944 | 0.000  | P | 1446.259 | P | 751.597  | P | 691.200  | LOC_Os12g14699.1 |
| DG <sub>HP</sub> | Os031198_01 | S6 | 0.000  | -0.812 | P | 561.513  | P | 587.519  | P | 1031.587 | LOC_Os02g09750.1 |
| DG <sub>HP</sub> | Os031283_01 | S6 | -1.154 | 10.000 | P | 875.956  | P | 393.499  | A | 99.087   | LOC_Os09g15400.1 |
| DG <sub>HP</sub> | Os031388_01 | S6 | 0.959  | 0.000  | P | 194.708  | P | 378.429  | P | 494.736  | LOC_Os01g08350.1 |
| DG <sub>HP</sub> | Os031452_01 | S6 | 0.000  | 1.004  | P | 217.869  | P | 274.574  | P | 136.863  | LOC_Os04g32820.1 |
| DG <sub>HP</sub> | Os031850_01 | S6 | -1.088 | 0.000  | P | 3345.547 | P | 1574.290 | P | 1874.713 | LOC_Os01g24940.1 |
| DG <sub>HP</sub> | Os031910_01 | S6 | 0.994  | 0.000  | P | 332.740  | P | 662.801  | P | 415.457  | -                |
| DG <sub>HP</sub> | Os032072_01 | S6 | 0.000  | 0.914  | P | 350.581  | P | 428.536  | P | 227.395  | -                |
| DG <sub>HP</sub> | Os032147_01 | S6 | -1.258 | -1.244 | P | 1414.801 | P | 591.755  | P | 1401.300 | LOC_Os10g10630.1 |
| DG <sub>HP</sub> | Os032578_01 | S6 | 0.000  | -0.813 | P | 267.152  | P | 189.187  | P | 332.455  | LOC_Os01g39220.1 |
| DG <sub>HP</sub> | Os032897_01 | S6 | -1.589 | 0.000  | P | 680.634  | P | 226.238  | P | 166.192  | LOC_Os03g44850.1 |
| DG <sub>HP</sub> | Os033072_01 | S6 | 0.928  | 0.000  | P | 134.931  | P | 256.813  | P | 351.086  | LOC_Os12g29230.1 |
| DG <sub>HP</sub> | Os033430_01 | S6 | 10.000 | -1.408 | A | 103.885  | P | 265.440  | P | 704.527  | LOC_Os10g22630.1 |
| DG <sub>HP</sub> | Os033722_01 | S6 | 0.000  | -0.774 | P | 347.305  | P | 278.158  | P | 475.566  | LOC_Os02g32150.1 |
| DG <sub>HP</sub> | Os033886_01 | S6 | 0.987  | 0.000  | P | 291.724  | P | 578.189  | P | 606.413  | LOC_Os08g33300.1 |
| DG <sub>HP</sub> | Os033915_01 | S6 | 1.352  | 0.000  | P | 288.392  | P | 736.092  | P | 1102.521 | LOC_Os11g45530.1 |
| DG <sub>HP</sub> | Os034325_01 | S6 | 0.000  | -0.854 | P | 1220.339 | P | 665.104  | P | 1201.983 | LOC_Os03g10980.1 |
| DG <sub>HP</sub> | Os034920_01 | S6 | 10.000 | 1.432  | A | 1322.060 | P | 508.974  | P | 188.601  | LOC_Os04g08160.1 |
| DG <sub>HP</sub> | Os035193_01 | S6 | -1.119 | -0.959 | P | 633.319  | P | 291.545  | P | 566.631  | LOC_Os01g11970.1 |
| DG <sub>HP</sub> | Os035398_01 | S6 | 0.000  | -0.793 | P | 624.739  | P | 420.027  | P | 727.890  | -                |
| DG <sub>HP</sub> | Os036231_01 | S6 | -1.047 | -1.100 | P | 2075.205 | P | 1004.491 | P | 2153.040 | LOC_Os03g46200.1 |
| DG <sub>HP</sub> | Os036325_01 | S6 | 0.972  | 0.000  | P | 895.182  | P | 1756.472 | P | 1739.758 | LOC_Os08g19550.1 |



|                  |             |    |        |        |   |           |   |          |   |          |                  |
|------------------|-------------|----|--------|--------|---|-----------|---|----------|---|----------|------------------|
| DG <sub>HP</sub> | Os036341_01 | S6 | -0.930 | 10.000 | P | 476.473   | P | 250.003  | A | 79.679   | LOC_Os07g05510.1 |
| DG <sub>HP</sub> | Os036373_01 | S6 | 1.226  | 0.000  | P | 639.598   | P | 1495.886 | P | 2129.973 | LOC_Os04g03250.1 |
| DG <sub>HP</sub> | Os036618_01 | S6 | -2.323 | -1.544 | P | 8401.042  | P | 1678.926 | P | 4896.491 | LOC_Os04g33830.1 |
| DG <sub>HP</sub> | Os038003_01 | S6 | -0.922 | 0.000  | P | 752.398   | P | 397.115  | P | 372.732  | LOC_Os05g42070.1 |
| DG <sub>HP</sub> | Os038005_01 | S6 | 0.000  | -0.985 | P | 351.267   | P | 391.043  | P | 774.229  | LOC_Os01g71970.1 |
| DG <sub>HP</sub> | Os038103_01 | S6 | 0.000  | -0.793 | P | 127.497   | P | 187.553  | P | 324.894  | LOC_Os10g26670.1 |
| DG <sub>HP</sub> | Os038144_01 | S6 | 0.000  | -0.858 | P | 139.256   | P | 149.977  | P | 271.868  | LOC_Os07g39080.1 |
| DG <sub>HP</sub> | Os038233_01 | S6 | -1.146 | 0.000  | P | 13494.155 | P | 6097.925 | P | 9614.029 | -                |
| DG <sub>HP</sub> | Os038407_01 | S6 | 0.000  | 1.358  | P | 192.084   | P | 361.648  | P | 141.076  | LOC_Os09g25690.1 |
| DG <sub>HP</sub> | Os038408_01 | S6 | -1.327 | 0.000  | P | 1689.034  | P | 673.348  | P | 600.252  | LOC_Os09g25700.1 |
| DG <sub>HP</sub> | Os038448_01 | S6 | 1.174  | 0.000  | P | 325.391   | P | 734.427  | P | 593.978  | LOC_Os11g10890.1 |
| DG <sub>HP</sub> | Os038478_01 | S6 | -1.412 | 0.000  | P | 531.536   | P | 199.686  | P | 299.763  | LOC_Os01g44390.1 |
| DG <sub>HP</sub> | Os038480_01 | S6 | -1.060 | 0.000  | P | 1501.286  | P | 719.828  | P | 1134.233 | LOC_Os01g44370.1 |
| DG <sub>HP</sub> | Os038619_01 | S6 | -1.425 | 0.000  | P | 793.594   | P | 295.611  | P | 309.174  | -                |
| DG <sub>HP</sub> | Os038695_01 | S6 | 1.105  | 0.000  | P | 154.038   | P | 331.377  | P | 470.713  | -                |
| DG <sub>HP</sub> | Os038729_01 | S6 | 1.197  | 0.000  | P | 400.582   | P | 918.608  | P | 700.255  | LOC_Os05g07880.2 |
| DG <sub>HP</sub> | Os038872_01 | S6 | -0.978 | 0.000  | P | 573.762   | P | 291.312  | P | 221.420  | LOC_Os12g12590.1 |
| DG <sub>HP</sub> | Os039150_01 | S6 | -0.984 | 10.000 | P | 394.638   | P | 199.492  | A | 53.757   | LOC_Os02g18070.1 |
| DG <sub>HP</sub> | Os039503_01 | S6 | 0.992  | 0.000  | P | 88.916    | P | 176.793  | P | 149.587  | -                |
| DG <sub>HP</sub> | Os039580_01 | S6 | -1.488 | 10.000 | P | 852.816   | P | 304.053  | A | 55.119   | LOC_Os02g40180.1 |
| DG <sub>HP</sub> | Os039696_01 | S6 | 0.000  | 1.030  | P | 307.747   | P | 380.346  | P | 186.312  | LOC_Os07g26900.1 |
| DG <sub>HP</sub> | Os039971_01 | S6 | 1.823  | 2.246  | P | 560.642   | P | 1982.997 | P | 417.898  | LOC_Os10g26330.1 |
| DG <sub>HP</sub> | Os040328_01 | S6 | 0.000  | -1.309 | P | 128.360   | P | 210.649  | P | 521.885  | LOC_Os05g31400.1 |
| DG <sub>HP</sub> | Os040799_01 | S6 | 1.263  | 0.000  | P | 341.779   | P | 820.162  | P | 645.033  | LOC_Os10g25410.1 |
| DG <sub>HP</sub> | Os041632_01 | S6 | 1.088  | 0.000  | P | 155.659   | P | 330.934  | P | 460.310  | -                |
| DG <sub>HP</sub> | Os041875_01 | S6 | -0.972 | 0.000  | P | 352.526   | P | 179.658  | P | 238.378  | LOC_Os03g47480.1 |
| DG <sub>HP</sub> | Os042408_01 | S6 | -1.838 | 10.000 | P | 445.623   | P | 124.629  | A | 38.095   | LOC_Os09g29040.1 |
| DG <sub>HP</sub> | Os042442_01 | S6 | 0.958  | 0.000  | P | 449.480   | P | 873.138  | P | 725.748  | LOC_Os01g23990.1 |
| DG <sub>HP</sub> | Os042527_01 | S6 | 1.026  | 0.950  | P | 1033.972  | P | 2106.218 | P | 1090.533 | LOC_Os05g28840.1 |
| DG <sub>HP</sub> | Os042725_01 | S6 | 0.000  | 0.999  | P | 498.891   | P | 290.265  | P | 145.195  | LOC_Os07g35740.1 |
| DG <sub>HP</sub> | Os042918_01 | S6 | -1.141 | 0.000  | P | 983.017   | P | 445.662  | P | 641.221  | LOC_Os03g31630.1 |

|                  |             |    |        |        |   |           |   |           |   |           |                  |
|------------------|-------------|----|--------|--------|---|-----------|---|-----------|---|-----------|------------------|
| DG <sub>HP</sub> | Os043254_01 | S6 | -0.915 | 1.116  | P | 1091.282  | P | 578.699   | P | 267.053   | LOC_Os09g18070.1 |
| DG <sub>HP</sub> | Os043506_01 | S6 | 0.979  | 0.000  | P | 1560.361  | P | 3076.214  | P | 3767.608  | LOC_Os07g35880.1 |
| DG <sub>HP</sub> | Os043618_01 | S6 | 1.246  | 0.000  | P | 322.821   | P | 765.590   | P | 502.164   | -                |
| DG <sub>HP</sub> | Os043740_01 | S6 | -1.430 | -0.936 | P | 6581.831  | P | 2443.217  | P | 4673.408  | LOC_Os04g11956.1 |
| DG <sub>HP</sub> | Os043803_01 | S6 | 0.000  | 1.462  | P | 393.195   | P | 419.599   | P | 152.355   | LOC_Os04g20280.1 |
| DG <sub>HP</sub> | Os044009_01 | S6 | -1.156 | -1.262 | P | 976.310   | P | 438.128   | P | 1050.476  | LOC_Os03g42200.1 |
| DG <sub>HP</sub> | Os044136_01 | S6 | -0.971 | 0.000  | P | 574.352   | P | 293.040   | P | 482.137   | -                |
| DG <sub>HP</sub> | Os044170_01 | S6 | 0.000  | 1.367  | P | 1363.415  | P | 818.623   | P | 317.338   | LOC_Os01g40200.1 |
| DG <sub>HP</sub> | Os044239_01 | S6 | -1.231 | 0.000  | P | 17431.737 | P | 7425.924  | P | 11011.481 | LOC_Os06g47690.1 |
| DG <sub>HP</sub> | Os044283_01 | S6 | 10.000 | -1.154 | A | 35.261    | P | 338.468   | P | 753.046   | -                |
| DG <sub>HP</sub> | Os044300_01 | S6 | -0.918 | 1.388  | P | 28043.626 | P | 14837.351 | P | 5668.032  | LOC_Os05g11320.1 |
| DG <sub>HP</sub> | Os044585_01 | S6 | 0.000  | 1.768  | P | 1065.869  | P | 606.276   | P | 177.972   | LOC_Os05g14360.1 |
| DG <sub>HP</sub> | Os044913_01 | S6 | 1.091  | 0.000  | P | 317.196   | P | 675.675   | P | 550.758   | LOC_Os02g27300.1 |
| DG <sub>HP</sub> | Os044943_01 | S6 | 1.025  | 0.000  | P | 2065.793  | P | 4203.118  | P | 5129.766  | LOC_Os07g47750.1 |
| DG <sub>HP</sub> | Os045112_01 | S6 | 0.000  | 1.844  | P | 1012.676  | P | 623.743   | P | 173.707   | -                |
| DG <sub>HP</sub> | Os045347_01 | S6 | 2.099  | -1.003 | P | 107.935   | P | 462.411   | P | 926.753   | LOC_Os06g18120.1 |
| DG <sub>HP</sub> | Os045398_01 | S6 | 0.980  | 0.000  | P | 112.682   | P | 222.240   | P | 255.839   | LOC_Os12g25450.1 |
| DG <sub>HP</sub> | Os045461_01 | S6 | -1.226 | -1.168 | P | 3383.837  | P | 1446.282  | P | 3250.582  | LOC_Os05g48630.2 |
| DG <sub>HP</sub> | Os045474_01 | S6 | 0.000  | -0.998 | P | 161.116   | P | 175.841   | P | 351.292   | LOC_Os06g11610.1 |
| DG <sub>HP</sub> | Os045565_01 | S6 | 10.000 | -0.947 | A | 78.868    | P | 534.603   | P | 1030.802  | LOC_Os10g09630.1 |
| DG <sub>HP</sub> | Os045632_01 | S6 | -1.058 | 0.000  | P | 1614.371  | P | 775.501   | P | 594.596   | LOC_Os07g18070.1 |
| DG <sub>HP</sub> | Os045661_01 | S6 | -1.045 | 0.000  | P | 343.298   | P | 166.390   | P | 150.586   | LOC_Os10g23180.1 |
| DG <sub>HP</sub> | Os045935_01 | S6 | 0.000  | 1.541  | P | 634.745   | P | 489.853   | P | 168.347   | LOC_Os08g16790.1 |
| DG <sub>HP</sub> | Os045951_01 | S6 | 1.021  | 10.000 | P | 94.808    | P | 192.375   | A | 173.680   | LOC_Os03g07000.1 |
| DG <sub>HP</sub> | Os045964_01 | S6 | 1.115  | 0.000  | P | 144.436   | P | 312.767   | P | 487.065   | -                |
| DG <sub>HP</sub> | Os046147_01 | S6 | 1.266  | 0.000  | P | 188.407   | P | 453.174   | P | 402.450   | LOC_Os03g10280.1 |
| DG <sub>HP</sub> | Os046324_01 | S6 | 0.924  | 10.000 | P | 119.288   | P | 226.293   | A | 133.921   | LOC_Os12g02420.2 |
| DG <sub>HP</sub> | Os046711_01 | S6 | 2.086  | 10.000 | P | 127.404   | P | 540.762   | A | 199.558   | -                |
| DG <sub>HP</sub> | Os046783_01 | S6 | 1.322  | -0.840 | P | 222.162   | P | 555.576   | P | 994.794   | LOC_Os01g13860.1 |
| DG <sub>HP</sub> | Os046888_01 | S6 | 1.187  | 0.000  | P | 544.406   | P | 1239.252  | P | 756.163   | LOC_Os03g25460.1 |
| DG <sub>HP</sub> | Os047140_01 | S6 | 0.000  | -0.900 | P | 6857.839  | P | 4478.340  | P | 8357.384  | -                |

|                  |             |    |        |        |   |          |   |          |   |          |                  |
|------------------|-------------|----|--------|--------|---|----------|---|----------|---|----------|------------------|
| DG <sub>HP</sub> | Os047260_01 | S6 | 0.000  | 0.930  | P | 9137.287 | P | 5527.999 | P | 2902.040 | LOC_Os06g34840.1 |
| DG <sub>HP</sub> | Os047467_01 | S6 | -1.041 | 0.000  | P | 784.863  | P | 381.331  | P | 480.590  | LOC_Os08g05160.1 |
| DG <sub>HP</sub> | Os047473_01 | S6 | 1.939  | 10.000 | P | 151.048  | P | 579.159  | A | 105.994  | LOC_Os02g53570.1 |
| DG <sub>HP</sub> | Os047560_01 | S6 | -1.378 | 0.000  | P | 1199.446 | P | 461.453  | P | 361.576  | LOC_Os07g12890.1 |
| DG <sub>HP</sub> | Os047654_01 | S6 | 0.000  | 1.038  | P | 1415.290 | P | 1398.462 | P | 681.040  | -                |
| DG <sub>HP</sub> | Os048525_01 | S6 | -1.409 | -1.180 | P | 3733.193 | P | 1406.007 | P | 3185.865 | LOC_Os07g14750.1 |
| DG <sub>HP</sub> | Os048609_01 | S6 | -0.914 | 0.000  | P | 391.417  | P | 207.761  | P | 318.109  | LOC_Os10g34902.1 |
| DG <sub>HP</sub> | Os048668_01 | S6 | -1.365 | 0.000  | P | 516.053  | P | 200.413  | P | 229.727  | LOC_Os06g43740.1 |
| DG <sub>HP</sub> | Os048713_01 | S6 | -1.224 | -1.045 | P | 566.258  | P | 242.414  | P | 500.092  | LOC_Os11g27090.1 |
| DG <sub>HP</sub> | Os049133_01 | S6 | 10.000 | 0.993  | A | 119.943  | P | 210.883  | P | 105.961  | LOC_Os05g31370.1 |
| DG <sub>HP</sub> | Os049163_01 | S6 | 1.318  | 0.000  | P | 118.221  | P | 294.700  | P | 264.099  | -                |
| DG <sub>HP</sub> | Os049499_01 | S6 | -0.914 | 0.000  | P | 457.912  | P | 243.012  | P | 222.657  | LOC_Os05g27000.1 |
| DG <sub>HP</sub> | Os049938_01 | S6 | 0.000  | -0.814 | P | 192.137  | P | 128.676  | P | 226.210  | LOC_Os03g07660.1 |
| DG <sub>HP</sub> | Os050312_01 | S6 | -0.980 | 0.000  | P | 3750.263 | P | 1901.726 | P | 1101.093 | -                |
| DG <sub>HP</sub> | Os050385_01 | S6 | 0.000  | 0.916  | P | 678.797  | P | 400.963  | P | 212.479  | -                |
| DG <sub>HP</sub> | Os050517_01 | S6 | -1.357 | 10.000 | P | 566.321  | P | 221.032  | A | 80.887   | LOC_Os12g26490.1 |
| DG <sub>HP</sub> | Os050787_01 | S6 | -0.936 | 0.000  | P | 1831.800 | P | 957.674  | P | 1492.014 | LOC_Os03g28980.1 |
| DG <sub>HP</sub> | Os050925_01 | S6 | 10.000 | -0.915 | A | 179.642  | P | 188.678  | P | 355.657  | LOC_Os01g61840.1 |
| DG <sub>HP</sub> | Os051104_01 | S6 | 0.000  | 0.994  | P | 854.876  | P | 741.080  | P | 372.009  | -                |
| DG <sub>HP</sub> | Os051409_01 | S6 | 0.000  | 1.114  | P | 522.929  | P | 443.958  | P | 205.062  | LOC_Os12g09954.1 |
| DG <sub>HP</sub> | Os051641_01 | S6 | 0.925  | 0.000  | P | 143.939  | P | 273.363  | P | 198.862  | LOC_Os01g35780.1 |
| DG <sub>HP</sub> | Os051817_01 | S6 | 0.000  | 1.562  | P | 565.195  | P | 606.927  | P | 205.601  | LOC_Os03g30660.1 |
| DG <sub>HP</sub> | Os051935_01 | S6 | 1.783  | -1.306 | P | 283.152  | P | 974.493  | P | 2409.692 | LOC_Os01g15270.1 |
| DG <sub>HP</sub> | Os051940_01 | S6 | 0.000  | -0.850 | P | 753.829  | P | 559.379  | P | 1008.399 | LOC_Os10g39410.1 |
| DG <sub>HP</sub> | Os051951_01 | S6 | -1.070 | -1.039 | P | 6708.296 | P | 3196.088 | P | 6565.445 | LOC_Os07g05480.1 |
| DG <sub>HP</sub> | Os051956_01 | S6 | -2.714 | -1.298 | P | 8110.108 | P | 1236.032 | P | 3039.112 | LOC_Os07g37240.1 |
| DG <sub>HP</sub> | Os051973_01 | S6 | -1.380 | -1.102 | P | 5343.895 | P | 2052.958 | P | 4406.889 | LOC_Os01g45274.1 |
| DG <sub>HP</sub> | Os051981_01 | S6 | 1.311  | 0.000  | P | 1389.599 | P | 3446.689 | P | 2447.946 | LOC_Os11g47809.1 |
| DG <sub>HP</sub> | Os051998_01 | S6 | -1.358 | -1.102 | P | 5153.729 | P | 2010.121 | P | 4315.887 | LOC_Os12g08770.1 |
| DG <sub>HP</sub> | Os052012_01 | S6 | 0.000  | 0.920  | P | 310.252  | P | 505.933  | P | 267.390  | LOC_Os03g10340.1 |
| DG <sub>HP</sub> | Os052015_01 | S6 | -1.037 | 0.000  | P | 2207.572 | P | 1075.473 | P | 1057.945 | LOC_Os03g07300.1 |

|                  |             |    |        |        |   |           |   |          |   |          |                  |
|------------------|-------------|----|--------|--------|---|-----------|---|----------|---|----------|------------------|
| DG <sub>HP</sub> | Os052018_01 | S6 | -1.299 | 0.000  | P | 20517.911 | P | 8340.298 | P | 9894.934 | -                |
| DG <sub>HP</sub> | Os052028_01 | S6 | -1.059 | -1.222 | P | 2501.265  | P | 1200.686 | P | 2800.915 | LOC_Os12g23200.1 |
| DG <sub>HP</sub> | Os052052_01 | S6 | -0.919 | -1.164 | P | 916.178   | P | 484.538  | P | 1086.039 | LOC_Os10g37180.1 |
| DG <sub>HP</sub> | Os052055_01 | S6 | 1.234  | 0.000  | P | 171.199   | P | 402.563  | P | 357.253  | LOC_Os08g41300.1 |
| DG <sub>HP</sub> | Os052060_01 | S6 | 0.000  | 0.803  | P | 1156.329  | P | 861.146  | P | 493.458  | LOC_Os08g43580.1 |
| DG <sub>HP</sub> | Os052084_01 | S6 | 0.000  | 0.911  | P | 549.872   | P | 394.280  | P | 209.736  | LOC_Os11g32650.1 |
| DG <sub>HP</sub> | Os052085_01 | S6 | -1.886 | -0.870 | P | 3538.549  | P | 957.189  | P | 1749.552 | LOC_Os07g25430.3 |
| DG <sub>HP</sub> | Os052148_01 | S6 | 1.019  | 0.000  | P | 163.722   | P | 331.742  | P | 409.175  | -                |
| DG <sub>HP</sub> | Os052183_01 | S6 | 0.000  | 0.910  | P | 246.018   | P | 190.885  | P | 101.552  | LOC_Os01g66960.1 |
| DG <sub>HP</sub> | Os052207_01 | S6 | -0.986 | 0.000  | P | 1098.089  | P | 554.580  | P | 850.984  | LOC_Os01g47330.1 |
| DG <sub>HP</sub> | Os052214_01 | S6 | 1.980  | 2.123  | P | 424.900   | P | 1676.435 | P | 384.937  | -                |
| DG <sub>HP</sub> | Os052232_01 | S6 | 0.000  | -0.850 | P | 302.157   | P | 240.774  | P | 434.124  | LOC_Os02g30630.2 |
| DG <sub>HP</sub> | Os052281_01 | S6 | -1.023 | 0.000  | P | 2641.230  | P | 1299.723 | P | 1539.471 | LOC_Os07g46460.1 |
| DG <sub>HP</sub> | Os052307_01 | S6 | -1.808 | -0.929 | P | 1557.208  | P | 444.667  | P | 846.729  | LOC_Os03g31750.1 |
| DG <sub>HP</sub> | Os052396_01 | S6 | 0.000  | -0.837 | P | 236.459   | P | 274.714  | P | 490.877  | LOC_Os05g01290.1 |
| DG <sub>HP</sub> | Os052404_01 | S6 | 0.000  | -0.876 | P | 1634.369  | P | 1028.657 | P | 1887.523 | LOC_Os06g47220.1 |
| DG <sub>HP</sub> | Os052558_01 | S6 | 0.000  | -0.894 | P | 340.528   | P | 281.695  | P | 523.654  | -                |
| DG <sub>HP</sub> | Os052637_01 | S6 | 0.000  | 0.874  | P | 480.852   | P | 412.565  | P | 225.115  | -                |
| DG <sub>HP</sub> | Os052672_01 | S6 | 0.959  | -0.846 | P | 136.308   | P | 265.028  | P | 476.465  | LOC_Os01g62810.2 |
| DG <sub>HP</sub> | Os052686_01 | S6 | -1.000 | 0.000  | P | 909.323   | P | 454.506  | P | 291.290  | LOC_Os10g26620.1 |
| DG <sub>HP</sub> | Os052819_01 | S6 | 0.996  | 0.000  | P | 307.653   | P | 613.662  | P | 470.698  | -                |
| DG <sub>HP</sub> | Os052823_01 | S6 | -1.363 | 0.000  | P | 3345.283  | P | 1300.703 | P | 847.208  | LOC_Os02g09460.1 |
| DG <sub>HP</sub> | Os052943_01 | S6 | 1.281  | 0.000  | P | 233.109   | P | 566.638  | P | 403.212  | LOC_Os01g45570.1 |
| DG <sub>HP</sub> | Os053523_01 | S6 | 0.000  | 1.562  | P | 422.032   | P | 671.970  | P | 227.661  | LOC_Os02g45520.2 |
| DG <sub>HP</sub> | Os054035_01 | S6 | 0.000  | 0.989  | P | 499.261   | P | 726.690  | P | 366.077  | -                |
| DG <sub>HP</sub> | Os054267_01 | S6 | 1.262  | 0.000  | P | 515.002   | P | 1235.009 | P | 1188.720 | -                |
| DG <sub>HP</sub> | Os054419_01 | S6 | -1.136 | -1.229 | P | 6807.363  | P | 3097.796 | P | 7259.141 | LOC_Os01g31690.1 |
| DG <sub>HP</sub> | Os054429_01 | S6 | -1.452 | 10.000 | P | 379.049   | P | 138.558  | A | 118.542  | LOC_Os12g38051.1 |
| DG <sub>HP</sub> | Os054432_01 | S6 | -0.988 | 0.000  | P | 1426.528  | P | 719.008  | P | 1042.909 | LOC_Os04g58200.1 |
| DG <sub>HP</sub> | Os054436_01 | S6 | 0.000  | -0.917 | P | 1434.492  | P | 968.592  | P | 1829.289 | LOC_Os09g39780.2 |
| DG <sub>HP</sub> | Os054451_01 | S6 | -1.050 | 0.000  | P | 388.768   | P | 187.786  | P | 282.428  | LOC_Os03g08360.1 |

|                  |             |    |        |        |   |           |   |          |   |           |                  |
|------------------|-------------|----|--------|--------|---|-----------|---|----------|---|-----------|------------------|
| DG <sub>HP</sub> | Os054452_01 | S6 | -1.479 | -1.102 | P | 5091.410  | P | 1826.409 | P | 3919.601  | LOC_Os07g04840.1 |
| DG <sub>HP</sub> | Os054455_01 | S6 | 1.166  | 0.000  | P | 175.404   | P | 393.641  | P | 345.805   | LOC_Os08g03640.1 |
| DG <sub>HP</sub> | Os054459_01 | S6 | -0.942 | 0.000  | P | 14546.240 | P | 7570.948 | P | 10119.666 | LOC_Os08g10020.2 |
| DG <sub>HP</sub> | Os054468_01 | S6 | -1.267 | 0.000  | P | 17623.896 | P | 7325.414 | P | 12258.683 | LOC_Os04g38600.1 |
| DG <sub>HP</sub> | Os054472_01 | S6 | -1.102 | 0.000  | P | 6210.730  | P | 2893.708 | P | 3798.487  | -                |
| DG <sub>HP</sub> | Os054487_01 | S6 | -1.140 | -1.508 | P | 1136.509  | P | 515.823  | P | 1466.817  | LOC_Os06g04020.1 |
| DG <sub>HP</sub> | Os054533_01 | S6 | -1.130 | -0.852 | P | 5049.163  | P | 2306.270 | P | 4162.142  | LOC_Os03g56670.2 |
| DG <sub>HP</sub> | Os054538_01 | S6 | -1.681 | -1.193 | P | 1113.146  | P | 347.145  | P | 793.882   | LOC_Os05g33570.1 |
| DG <sub>HP</sub> | Os054539_01 | S6 | -1.040 | 0.000  | P | 10505.091 | P | 5110.034 | P | 8608.697  | LOC_Os09g30340.1 |
| DG <sub>HP</sub> | Os054577_01 | S6 | 1.430  | 0.000  | P | 109.871   | P | 296.030  | P | 444.386   | LOC_Os04g55920.2 |
| DG <sub>HP</sub> | Os054583_01 | S6 | -1.286 | 0.000  | P | 2873.431  | P | 1178.233 | P | 1581.810  | LOC_Os06g04270.1 |
| DG <sub>HP</sub> | Os054590_01 | S6 | 2.087  | 1.132  | P | 260.777   | P | 1108.060 | P | 505.436   | LOC_Os03g09250.2 |
| DG <sub>HP</sub> | Os054595_01 | S6 | 1.049  | 0.000  | P | 271.426   | P | 561.540  | P | 707.675   | LOC_Os04g32950.1 |
| DG <sub>HP</sub> | Os054604_01 | S6 | 0.000  | 1.484  | P | 1466.830  | P | 1901.860 | P | 679.878   | LOC_Os07g39350.1 |
| DG <sub>HP</sub> | Os054626_01 | S6 | 1.109  | 0.000  | P | 179.970   | P | 388.161  | P | 312.012   | LOC_Os03g22810.1 |
| DG <sub>HP</sub> | Os054627_01 | S6 | 0.000  | 1.026  | P | 1865.317  | P | 1154.342 | P | 566.883   | LOC_Os01g73940.1 |
| DG <sub>HP</sub> | Os054653_01 | S6 | -0.928 | 0.000  | P | 1127.851  | P | 592.839  | P | 717.257   | LOC_Os01g46070.1 |
| DG <sub>HP</sub> | Os054657_01 | S6 | 0.000  | 3.563  | P | 2850.569  | P | 1872.486 | P | 158.434   | LOC_Os02g13870.1 |
| DG <sub>HP</sub> | Os054659_01 | S6 | 0.000  | 1.009  | P | 653.737   | P | 730.904  | P | 363.077   | LOC_Os01g07760.2 |
| DG <sub>HP</sub> | Os054724_01 | S6 | 0.000  | 0.903  | P | 338.068   | P | 336.782  | P | 180.148   | LOC_Os09g35730.1 |
| DG <sub>HP</sub> | Os054745_01 | S6 | -0.966 | 0.000  | P | 18288.091 | P | 9362.659 | P | 9461.447  | LOC_Os07g37030.1 |
| DG <sub>HP</sub> | Os054747_01 | S6 | 0.000  | 0.993  | P | 289.458   | P | 279.754  | P | 140.558   | LOC_Os05g06270.1 |
| DG <sub>HP</sub> | Os054752_01 | S6 | -1.105 | 0.000  | P | 1161.827  | P | 540.254  | P | 525.985   | -                |
| DG <sub>HP</sub> | Os054810_01 | S6 | 0.000  | -0.794 | P | 621.853   | P | 505.928  | P | 877.405   | LOC_Os01g69950.1 |
| DG <sub>HP</sub> | Os054826_01 | S6 | 1.079  | 0.000  | P | 238.611   | P | 503.913  | P | 746.794   | LOC_Os01g70210.1 |
| DG <sub>HP</sub> | Os054912_01 | S6 | -0.998 | 0.000  | P | 1360.730  | P | 681.376  | P | 641.062   | LOC_Os02g44108.1 |
| DG <sub>HP</sub> | Os054951_01 | S6 | 0.000  | 1.005  | P | 768.888   | P | 1281.258 | P | 638.361   | LOC_Os01g50700.1 |
| DG <sub>HP</sub> | Os054983_01 | S6 | 0.000  | 0.855  | P | 249.682   | P | 289.676  | P | 160.148   | LOC_Os05g33310.1 |
| DG <sub>HP</sub> | Os055024_01 | S6 | -0.976 | 0.000  | P | 829.270   | P | 421.675  | P | 314.357   | LOC_Os04g53310.1 |
| DG <sub>HP</sub> | Os055042_01 | S6 | 0.000  | 0.834  | P | 754.626   | P | 690.543  | P | 387.372   | LOC_Os09g06464.1 |
| DG <sub>HP</sub> | Os055048_01 | S6 | 0.000  | 0.857  | P | 311.487   | P | 273.294  | P | 150.927   | LOC_Os10g42830.1 |

|                  |               |    |                  |        |   |                  |   |              |         |              |                  |
|------------------|---------------|----|------------------|--------|---|------------------|---|--------------|---------|--------------|------------------|
| DG <sub>HP</sub> | Os055146_01   | S6 | 0.000            | 0.931  | P | 582.353          | P | 364.643      | P       | 191.316      | LOC_Os08g39500.1 |
| DG <sub>HP</sub> | Os055221_01   | S6 | 0.000            | -0.986 | P | 860.985          | P | 524.286      | P       | 1038.282     | LOC_Os12g43380.1 |
| DG <sub>HP</sub> | Os055225_01   | S6 | 10.000           | -0.939 | A | 71.370           | P | 132.614      | P       | 254.165      | LOC_Os10g40360.1 |
| DG <sub>HP</sub> | Os055265_01   | S6 | 0.000            | 0.898  | P | 460.777          | P | 420.521      | P       | 225.651      | -                |
| DG <sub>HP</sub> | Os055319_01   | S6 | 1.345            | 0.000  | P | 173.818          | P | 441.662      | P       | 478.664      | LOC_Os05g29990.1 |
| DG <sub>HP</sub> | Os055340_01   | S6 | 0.000            | 0.988  | P | 824.235          | P | 446.595      | P       | 225.130      | -                |
| DG <sub>HP</sub> | Os055567_01   | S6 | 0.000            | -0.772 | P | 1193.717         | P | 1154.548     | P       | 1971.897     | LOC_Os07g46330.1 |
| DG <sub>HP</sub> | Os055629_01   | S6 | 1.302            | 0.000  | P | 242.213          | P | 597.131      | P       | 780.237      | LOC_Os02g02340.1 |
| DG <sub>HP</sub> | Os055646_01   | S6 | 0.000            | 1.210  | P | 492.132          | P | 363.846      | P       | 157.294      | LOC_Os12g29670.1 |
| DG <sub>HP</sub> | Os055739_02   | S6 | 0.000            | 0.848  | P | 567.088          | P | 734.115      | P       | 407.768      | -                |
| DG <sub>HP</sub> | Os056222_01   | S6 | -1.424           | 0.000  | P | 1381.699         | P | 514.958      | P       | 746.541      | LOC_Os06g01580.1 |
| DG <sub>HP</sub> | Os056494_02   | S6 | 0.000            | -0.769 | P | 222.048          | P | 253.612      | P       | 432.209      | -                |
| DG <sub>HP</sub> | Os056792_01   | S6 | -1.061           | 0.000  | P | 876.065          | P | 419.974      | P       | 443.778      | LOC_Os06g08014.1 |
| DG <sub>HP</sub> | Os056910_02   | S6 | -1.049           | -1.620 | P | 9118.451         | P | 4405.926     | P       | 13542.881    | LOC_Os08g33820.1 |
| DG <sub>HP</sub> | Os056918_02   | S6 | -2.382           | 0.000  | P | 2515.655         | P | 482.528      | P       | 277.822      | LOC_Os01g13690.1 |
| DG <sub>HP</sub> | Os056919_02   | S6 | 0.000            | 1.276  | P | 273.819          | P | 479.609      | P       | 198.112      | -                |
| DG <sub>HP</sub> | Os056920_02   | S6 | -1.976           | -0.956 | P | 1657.207         | P | 421.243      | P       | 817.382      | -                |
| DG <sub>HP</sub> | Os056979_02   | S6 | 0.000            | 1.035  | P | 1666.189         | P | 1709.573     | P       | 834.289      | LOC_Os11g02300.1 |
| DG <sub>HP</sub> | Os056989_02   | S6 | -1.041           | -0.773 | P | 256.800          | P | 124.792      | P       | 213.312      | -                |
| DG <sub>HP</sub> | Os057047_02   | S6 | 0.000            | 0.834  | P | 283.015          | P | 239.874      | P       | 134.594      | LOC_Os04g40080.1 |
| DG <sub>HP</sub> | Os057161_02   | S6 | -1.167           | 0.000  | P | 970.455          | P | 432.133      | P       | 378.251      | LOC_Os03g62170.1 |
| DG <sub>HP</sub> | Os057245_02   | S6 | -0.977           | 0.000  | P | 896.953          | P | 455.790      | P       | 265.105      | LOC_Os07g48010.1 |
| DG <sub>HP</sub> | Os057254_02   | S6 | -1.678           | -1.914 | P | 14697.286        | P | 4592.859     | P       | 17311.272    | -                |
| DG <sub>HP</sub> | Os057284_02   | S6 | 0.000            | -0.966 | P | 485.329          | P | 528.944      | P       | 1033.513     | LOC_Os07g02800.3 |
| DG <sub>HP</sub> | Os057301_02   | S6 | 0.000            | -1.093 | P | 457.420          | P | 594.138      | P       | 1267.502     | LOC_Os03g04710.1 |
| DG <sub>HP</sub> | GeneID        | S5 | log2(Ratio(L/9)) |        |   | log2(Ratio(L/P)) |   | Fw_9311.flag | Fw_9311 | Fw_LYP9.flag | Fw_LYP9          |
|                  | Fw_PA64s.flag |    | Fw_PA64s         |        |   | -                |   |              |         |              |                  |
| DG <sub>HP</sub> | Os000041_01   | S5 | 0.000            | 1.209  | P | 1285.938         | P | 1569.857     | P       | 679.054      | LOC_Os10g38700.1 |
| DG <sub>HP</sub> | Os000043_01   | S5 | 1.584            | 1.538  | P | 597.207          | P | 1790.670     | P       | 616.605      | LOC_Os10g39150.1 |
| DG <sub>HP</sub> | Os000169_01   | S5 | 0.000            | 1.667  | P | 576.017          | P | 1144.528     | P       | 360.512      | LOC_Os05g40010.1 |
| DG <sub>HP</sub> | Os000208_01   | S5 | 0.000            | -1.267 | P | 1363.493         | P | 1043.165     | P       | 2509.912     | LOC_Os02g09150.1 |

|                  |             |    |        |        |   |          |   |           |   |          |                  |
|------------------|-------------|----|--------|--------|---|----------|---|-----------|---|----------|------------------|
| DG <sub>HP</sub> | Os000367_01 | S5 | 1.356  | 0.000  | P | 3444.484 | P | 8814.896  | P | 9859.347 | LOC_Os06g01850.1 |
| DG <sub>HP</sub> | Os000380_01 | S5 | -1.155 | 0.000  | P | 853.424  | P | 383.135   | P | 456.661  | LOC_Os05g47540.1 |
| DG <sub>HP</sub> | Os000418_01 | S5 | 0.000  | 1.753  | P | 644.934  | P | 1368.031  | P | 405.772  | LOC_Os02g47600.2 |
| DG <sub>HP</sub> | Os000429_01 | S5 | 0.000  | 1.376  | P | 300.581  | P | 665.128   | P | 256.285  | LOC_Os01g68770.1 |
| DG <sub>HP</sub> | Os000445_01 | S5 | 0.000  | -1.632 | P | 707.109  | P | 733.146   | P | 2272.206 | LOC_Os01g37910.1 |
| DG <sub>HP</sub> | Os000597_01 | S5 | 0.000  | 1.617  | P | 299.615  | P | 597.332   | P | 194.700  | LOC_Os01g72460.1 |
| DG <sub>HP</sub> | Os000629_01 | S5 | 1.268  | 0.000  | P | 385.417  | P | 928.351   | P | 1064.635 | LOC_Os08g31750.1 |
| DG <sub>HP</sub> | Os000826_01 | S5 | 0.000  | -1.746 | P | 533.476  | P | 360.471   | P | 1208.928 | LOC_Os01g68830.1 |
| DG <sub>HP</sub> | Os000827_01 | S5 | 0.000  | -1.187 | P | 332.551  | P | 302.381   | P | 688.262  | LOC_Os03g31730.1 |
| DG <sub>HP</sub> | Os000842_01 | S5 | -1.958 | -2.568 | P | 5794.237 | P | 1491.595  | P | 8847.071 | LOC_Os12g33130.1 |
| DG <sub>HP</sub> | Os000918_01 | S5 | 0.000  | -2.443 | P | 219.222  | P | 308.890   | P | 1680.033 | LOC_Os11g44960.1 |
| DG <sub>HP</sub> | Os000963_01 | S5 | 1.222  | 0.000  | P | 234.617  | P | 547.260   | P | 411.704  | LOC_Os03g17050.1 |
| DG <sub>HP</sub> | Os001355_01 | S5 | 0.000  | -1.479 | P | 4228.247 | P | 2199.048  | P | 6128.735 | LOC_Os07g48460.1 |
| DG <sub>HP</sub> | Os001377_01 | S5 | 0.000  | 1.680  | P | 1597.113 | P | 3349.243  | P | 1045.106 | LOC_Os02g06710.1 |
| DG <sub>HP</sub> | Os001385_01 | S5 | 0.000  | -1.947 | P | 1189.300 | P | 1232.829  | P | 4753.491 | LOC_Os02g05470.1 |
| DG <sub>HP</sub> | Os001529_01 | S5 | 1.340  | 0.000  | P | 5663.192 | P | 14332.889 | P | 8202.230 | LOC_Os01g60830.1 |
| DG <sub>HP</sub> | Os001579_01 | S5 | 1.199  | 0.000  | P | 2008.563 | P | 4611.053  | P | 2774.732 | LOC_Os10g36170.1 |
| DG <sub>HP</sub> | Os001621_01 | S5 | 1.218  | 0.000  | P | 395.008  | P | 919.181   | P | 905.786  | LOC_Os05g47670.1 |
| DG <sub>HP</sub> | Os001637_01 | S5 | 0.000  | -1.115 | P | 445.724  | P | 288.083   | P | 623.855  | LOC_Os09g23110.1 |
| DG <sub>HP</sub> | Os001790_01 | S5 | 0.000  | -1.076 | P | 1055.485 | P | 679.447   | P | 1432.457 | LOC_Os09g28510.1 |
| DG <sub>HP</sub> | Os001830_01 | S5 | 1.248  | 0.000  | P | 352.152  | P | 836.590   | P | 677.020  | LOC_Os03g15590.1 |
| DG <sub>HP</sub> | Os001838_01 | S5 | 0.000  | -1.263 | P | 653.622  | P | 435.138   | P | 1044.204 | LOC_Os03g04440.1 |
| DG <sub>HP</sub> | Os001842_01 | S5 | 0.000  | 1.692  | P | 431.780  | P | 865.456   | P | 267.802  | -                |
| DG <sub>HP</sub> | Os001884_01 | S5 | 1.369  | 2.198  | P | 311.639  | P | 804.886   | P | 175.368  | LOC_Os03g60580.1 |
| DG <sub>HP</sub> | Os001903_01 | S5 | -1.307 | 10.000 | P | 504.498  | P | 203.899   | A | 89.075   | LOC_Os01g68290.1 |
| DG <sub>HP</sub> | Os001934_01 | S5 | 10.000 | -1.532 | A | 125.735  | P | 463.474   | P | 1340.442 | -                |
| DG <sub>HP</sub> | Os001981_01 | S5 | 0.000  | 1.208  | P | 712.455  | P | 614.265   | P | 265.920  | LOC_Os02g45920.1 |
| DG <sub>HP</sub> | Os002395_01 | S5 | 0.000  | -1.225 | P | 548.742  | P | 387.170   | P | 905.339  | -                |
| DG <sub>HP</sub> | Os002417_01 | S5 | 1.931  | 0.000  | P | 188.532  | P | 718.971   | P | 517.871  | LOC_Os06g10780.1 |
| DG <sub>HP</sub> | Os002451_01 | S5 | 1.371  | 0.000  | P | 164.314  | P | 424.904   | P | 336.168  | LOC_Os01g47730.1 |
| DG <sub>HP</sub> | Os002553_01 | S5 | 0.000  | -1.220 | P | 271.712  | P | 235.694   | P | 549.053  | LOC_Os06g45580.1 |

|                  |             |    |        |        |   |          |   |          |   |          |                  |
|------------------|-------------|----|--------|--------|---|----------|---|----------|---|----------|------------------|
| DG <sub>HP</sub> | Os002801_01 | S5 | 1.579  | 0.000  | P | 523.877  | P | 1565.525 | P | 2588.921 | LOC_Os02g57340.1 |
| DG <sub>HP</sub> | Os003908_01 | S5 | 1.611  | 10.000 | P | 193.245  | P | 590.365  | A | 618.815  | LOC_Os06g36590.1 |
| DG <sub>HP</sub> | Os003989_01 | S5 | 1.440  | 2.107  | P | 2726.397 | P | 7399.790 | P | 1717.802 | LOC_Os07g32570.1 |
| DG <sub>HP</sub> | Os004097_01 | S5 | 0.000  | -1.165 | P | 261.677  | P | 183.385  | P | 411.072  | LOC_Os12g12934.1 |
| DG <sub>HP</sub> | Os004223_01 | S5 | -1.084 | 0.000  | P | 482.561  | P | 227.619  | P | 268.651  | LOC_Os08g33200.1 |
| DG <sub>HP</sub> | Os004287_01 | S5 | 0.000  | 1.262  | P | 508.519  | P | 478.791  | P | 199.586  | LOC_Os03g28140.1 |
| DG <sub>HP</sub> | Os004399_01 | S5 | -1.201 | 10.000 | P | 1230.260 | P | 535.150  | A | 88.616   | LOC_Os02g40180.1 |
| DG <sub>HP</sub> | Os005159_01 | S5 | 0.000  | 2.072  | P | 260.887  | P | 580.882  | P | 138.154  | -                |
| DG <sub>HP</sub> | Os005642_01 | S5 | 0.000  | 1.387  | P | 302.417  | P | 366.143  | P | 140.043  | -                |
| DG <sub>HP</sub> | Os006070_01 | S5 | 0.000  | 1.266  | P | 2084.815 | P | 2716.678 | P | 1129.637 | LOC_Os01g40094.1 |
| DG <sub>HP</sub> | Os006546_02 | S5 | 0.000  | 1.218  | P | 475.954  | P | 827.904  | P | 355.784  | -                |
| DG <sub>HP</sub> | Os006733_01 | S5 | -1.258 | 0.000  | P | 697.403  | P | 291.700  | P | 318.008  | LOC_Os03g63330.1 |
| DG <sub>HP</sub> | Os007109_01 | S5 | 1.525  | 0.000  | P | 243.681  | P | 701.051  | P | 924.612  | LOC_Os05g25080.1 |
| DG <sub>HP</sub> | Os007196_01 | S5 | 0.000  | 1.751  | P | 325.091  | P | 538.728  | P | 160.048  | LOC_Os05g38290.1 |
| DG <sub>HP</sub> | Os007263_01 | S5 | -1.662 | -1.847 | P | 7393.602 | P | 2336.425 | P | 8404.349 | LOC_Os12g33150.1 |
| DG <sub>HP</sub> | Os007477_01 | S5 | 1.185  | 0.000  | P | 221.778  | P | 504.306  | P | 869.085  | LOC_Os09g27230.1 |
| DG <sub>HP</sub> | Os007500_01 | S5 | 1.385  | 0.000  | P | 228.031  | P | 595.484  | P | 1155.529 | LOC_Os07g41190.1 |
| DG <sub>HP</sub> | Os008101_01 | S5 | 0.000  | -1.459 | P | 509.114  | P | 522.737  | P | 1437.192 | LOC_Os01g48380.1 |
| DG <sub>HP</sub> | Os008169_01 | S5 | -1.177 | 0.000  | P | 3841.886 | P | 1699.681 | P | 951.132  | LOC_Os02g40240.2 |
| DG <sub>HP</sub> | Os008199_01 | S5 | 0.000  | -3.026 | P | 558.484  | P | 356.629  | P | 2904.364 | LOC_Os11g44990.1 |
| DG <sub>HP</sub> | Os008213_01 | S5 | 0.000  | -1.246 | P | 222.015  | P | 171.287  | P | 406.302  | LOC_Os05g05040.1 |
| DG <sub>HP</sub> | Os008355_02 | S5 | 0.000  | -1.318 | P | 241.081  | P | 142.243  | P | 354.579  | -                |
| DG <sub>HP</sub> | Os008439_01 | S5 | -1.477 | 10.000 | P | 921.770  | P | 331.096  | A | 453.487  | LOC_Os07g44740.1 |
| DG <sub>HP</sub> | Os008450_01 | S5 | 0.000  | 2.197  | P | 869.995  | P | 1100.703 | P | 240.123  | LOC_Os01g67980.1 |
| DG <sub>HP</sub> | Os008548_01 | S5 | 0.000  | 1.373  | P | 336.902  | P | 575.287  | P | 222.167  | LOC_Os03g02190.1 |
| DG <sub>HP</sub> | Os008602_01 | S5 | 0.000  | 1.902  | P | 1178.847 | P | 1553.034 | P | 415.633  | LOC_Os05g06920.1 |
| DG <sub>HP</sub> | Os008612_01 | S5 | 0.000  | -1.452 | P | 187.113  | P | 145.868  | P | 398.974  | LOC_Os03g61030.2 |
| DG <sub>HP</sub> | Os008618_01 | S5 | 1.826  | 0.000  | P | 474.699  | P | 1683.585 | P | 1087.735 | LOC_Os04g54640.1 |
| DG <sub>HP</sub> | Os008635_01 | S5 | 1.449  | 0.000  | P | 901.129  | P | 2460.307 | P | 1765.315 | LOC_Os02g55140.1 |
| DG <sub>HP</sub> | Os008644_01 | S5 | 1.578  | 0.000  | P | 354.733  | P | 1059.360 | P | 1605.732 | LOC_Os02g41520.1 |
| DG <sub>HP</sub> | Os008682_01 | S5 | 0.000  | -1.199 | P | 234.351  | P | 191.427  | P | 439.431  | LOC_Os07g11280.2 |



|                  |             |    |        |        |   |           |   |           |   |           |                  |
|------------------|-------------|----|--------|--------|---|-----------|---|-----------|---|-----------|------------------|
| DG <sub>HP</sub> | Os008707_01 | S5 | 0.000  | -1.275 | P | 189.860   | P | 163.824   | P | 396.538   | LOC_Os03g13730.1 |
| DG <sub>HP</sub> | Os008754_01 | S5 | 0.000  | -1.548 | P | 1327.972  | P | 1139.789  | P | 3332.497  | LOC_Os06g02490.1 |
| DG <sub>HP</sub> | Os008761_01 | S5 | 2.892  | 2.528  | P | 265.895   | P | 1974.034  | P | 342.205   | LOC_Os02g32580.1 |
| DG <sub>HP</sub> | Os008785_01 | S5 | 1.282  | 0.000  | P | 379.355   | P | 922.740   | P | 982.981   | LOC_Os04g35300.1 |
| DG <sub>HP</sub> | Os008826_01 | S5 | 0.000  | -1.167 | P | 316.451   | P | 207.801   | P | 466.711   | LOC_Os01g69060.2 |
| DG <sub>HP</sub> | Os008851_01 | S5 | 0.000  | 1.236  | P | 2079.491  | P | 1669.590  | P | 708.646   | LOC_Os01g11710.1 |
| DG <sub>HP</sub> | Os008878_01 | S5 | -1.329 | -2.410 | P | 809.887   | P | 322.282   | P | 1712.884  | LOC_Os08g06280.2 |
| DG <sub>HP</sub> | Os008888_01 | S5 | 0.000  | -1.355 | P | 239.571   | P | 151.708   | P | 388.170   | LOC_Os03g43420.1 |
| DG <sub>HP</sub> | Os008896_01 | S5 | 0.000  | -1.156 | P | 199.509   | P | 200.216   | P | 446.299   | LOC_Os04g51520.1 |
| DG <sub>HP</sub> | Os008962_01 | S5 | 1.372  | 10.000 | P | 192.443   | P | 497.962   | A | 660.117   | -                |
| DG <sub>HP</sub> | Os009003_01 | S5 | 1.433  | 0.000  | P | 404.485   | P | 1092.310  | P | 1470.908  | LOC_Os08g09340.1 |
| DG <sub>HP</sub> | Os009004_01 | S5 | 0.000  | 1.262  | P | 336.815   | P | 450.886   | P | 187.956   | LOC_Os06g48620.1 |
| DG <sub>HP</sub> | Os009024_01 | S5 | 0.000  | -1.536 | P | 618.171   | P | 320.805   | P | 930.541   | LOC_Os07g08710.2 |
| DG <sub>HP</sub> | Os009082_01 | S5 | 1.412  | 0.000  | P | 231.136   | P | 615.031   | P | 830.745   | LOC_Os04g42430.2 |
| DG <sub>HP</sub> | Os009089_01 | S5 | 1.604  | 0.000  | P | 137.595   | P | 418.396   | P | 236.325   | LOC_Os04g38940.1 |
| DG <sub>HP</sub> | Os009107_01 | S5 | 1.622  | 0.000  | P | 216.685   | P | 666.991   | P | 841.538   | LOC_Os02g50130.1 |
| DG <sub>HP</sub> | Os009115_01 | S5 | 0.000  | 1.209  | P | 436.040   | P | 395.323   | P | 170.947   | LOC_Os04g39440.2 |
| DG <sub>HP</sub> | Os009192_01 | S5 | 0.000  | 1.485  | P | 475.996   | P | 600.807   | P | 214.706   | LOC_Os01g50460.1 |
| DG <sub>HP</sub> | Os009222_01 | S5 | 0.000  | 1.475  | P | 667.039   | P | 1119.869  | P | 402.792   | LOC_Os02g56900.1 |
| DG <sub>HP</sub> | Os009518_01 | S5 | -1.178 | -2.650 | P | 4334.543  | P | 1915.497  | P | 12024.392 | LOC_Os01g73250.1 |
| DG <sub>HP</sub> | Os009547_01 | S5 | 0.000  | -2.016 | P | 330.134   | P | 259.806   | P | 1051.139  | LOC_Os01g13570.1 |
| DG <sub>HP</sub> | Os009556_01 | S5 | 0.000  | 1.904  | P | 4130.344  | P | 7187.572  | P | 1920.168  | LOC_Os03g59320.1 |
| DG <sub>HP</sub> | Os009578_01 | S5 | 0.000  | 1.207  | P | 670.147   | P | 1201.550  | P | 520.586   | LOC_Os12g44370.1 |
| DG <sub>HP</sub> | Os009604_01 | S5 | 0.000  | -1.449 | P | 1257.914  | P | 670.796   | P | 1831.144  | LOC_Os07g43810.1 |
| DG <sub>HP</sub> | Os009664_01 | S5 | 0.000  | 1.214  | P | 596.932   | P | 923.191   | P | 398.018   | LOC_Os03g04470.1 |
| DG <sub>HP</sub> | Os009673_01 | S5 | 1.424  | 10.000 | P | 297.557   | P | 798.690   | A | 1184.187  | LOC_Os11g27370.1 |
| DG <sub>HP</sub> | Os009705_01 | S5 | 0.000  | 2.151  | P | 522.010   | P | 899.189   | P | 202.432   | LOC_Os03g05280.1 |
| DG <sub>HP</sub> | Os009784_01 | S5 | 1.282  | 0.000  | P | 251.193   | P | 610.693   | P | 1031.693  | LOC_Os07g29794.1 |
| DG <sub>HP</sub> | Os009787_01 | S5 | 3.389  | 0.000  | P | 448.838   | P | 4702.046  | P | 2721.891  | LOC_Os07g23120.1 |
| DG <sub>HP</sub> | Os009883_01 | S5 | 0.000  | -1.323 | P | 5848.265  | P | 3905.959  | P | 9772.773  | LOC_Os02g51080.1 |
| DG <sub>HP</sub> | Os010002_01 | S5 | 0.000  | 1.770  | P | 33170.693 | P | 51076.351 | P | 14971.466 | LOC_Os01g54210.1 |

|                  |             |    |        |        |   |          |   |          |   |          |                  |
|------------------|-------------|----|--------|--------|---|----------|---|----------|---|----------|------------------|
| DG <sub>HP</sub> | Os010034_01 | S5 | 0.000  | 1.236  | P | 949.854  | P | 841.175  | P | 357.171  | LOC_Os01g68940.1 |
| DG <sub>HP</sub> | Os010111_01 | S5 | 1.736  | 0.000  | P | 215.242  | P | 716.863  | P | 312.610  | LOC_Os05g47530.1 |
| DG <sub>HP</sub> | Os010141_01 | S5 | 0.000  | -1.234 | P | 318.063  | P | 403.821  | P | 949.877  | -                |
| DG <sub>HP</sub> | Os010235_01 | S5 | 1.272  | 1.459  | P | 686.729  | P | 1657.959 | P | 602.958  | LOC_Os06g10130.1 |
| DG <sub>HP</sub> | Os010356_01 | S5 | 1.827  | 2.243  | P | 1394.251 | P | 4947.839 | P | 1045.373 | -                |
| DG <sub>HP</sub> | Os010477_01 | S5 | 0.000  | 1.470  | P | 2039.709 | P | 997.689  | P | 360.172  | -                |
| DG <sub>HP</sub> | Os010484_01 | S5 | 0.000  | -1.349 | P | 2079.193 | P | 1090.979 | P | 2779.372 | -                |
| DG <sub>HP</sub> | Os010488_01 | S5 | 0.000  | 1.354  | P | 4033.402 | P | 6944.735 | P | 2716.892 | -                |
| DG <sub>HP</sub> | Os010490_01 | S5 | -1.401 | -2.431 | P | 1509.459 | P | 571.625  | P | 3082.726 | LOC_Os03g49480.1 |
| DG <sub>HP</sub> | Os010510_01 | S5 | 0.000  | -1.237 | P | 274.417  | P | 203.956  | P | 480.897  | -                |
| DG <sub>HP</sub> | Os010642_01 | S5 | 0.000  | 1.303  | P | 2296.653 | P | 1961.693 | P | 795.016  | LOC_Os02g32570.1 |
| DG <sub>HP</sub> | Os010804_01 | S5 | 0.000  | 1.973  | P | 621.196  | P | 1199.204 | P | 305.425  | LOC_Os02g54140.1 |
| DG <sub>HP</sub> | Os010863_01 | S5 | 1.670  | 1.501  | P | 205.775  | P | 654.833  | P | 231.375  | LOC_Os02g43330.1 |
| DG <sub>HP</sub> | Os010924_01 | S5 | 0.000  | 1.534  | P | 584.187  | P | 1273.820 | P | 439.993  | LOC_Os09g39940.1 |
| DG <sub>HP</sub> | Os010927_01 | S5 | 2.245  | 10.000 | P | 245.671  | P | 1164.583 | A | 142.503  | -                |
| DG <sub>HP</sub> | Os010942_01 | S5 | 0.000  | 1.497  | P | 646.200  | P | 891.005  | P | 315.644  | LOC_Os06g44180.1 |
| DG <sub>HP</sub> | Os010948_01 | S5 | -2.262 | -1.689 | P | 1380.792 | P | 287.852  | P | 928.334  | LOC_Os03g03724.2 |
| DG <sub>HP</sub> | Os011007_01 | S5 | -1.308 | 0.000  | P | 610.572  | P | 246.649  | P | 465.185  | LOC_Os08g43190.2 |
| DG <sub>HP</sub> | Os011281_01 | S5 | 1.264  | 0.000  | P | 126.021  | P | 302.678  | P | 319.726  | LOC_Os06g43790.1 |
| DG <sub>HP</sub> | Os011457_01 | S5 | 0.000  | -1.648 | P | 189.783  | P | 135.145  | P | 423.655  | LOC_Os05g47880.1 |
| DG <sub>HP</sub> | Os011512_01 | S5 | 2.094  | 0.000  | P | 261.927  | P | 1118.425 | P | 868.133  | LOC_Os07g41370.1 |
| DG <sub>HP</sub> | Os011563_01 | S5 | 10.000 | 1.368  | A | 105.750  | P | 461.461  | P | 178.825  | LOC_Os03g13810.1 |
| DG <sub>HP</sub> | Os011578_01 | S5 | 1.692  | 0.000  | P | 2388.955 | P | 7717.319 | P | 6208.875 | LOC_Os03g38730.1 |
| DG <sub>HP</sub> | Os011601_01 | S5 | 0.000  | -1.223 | P | 145.092  | P | 163.696  | P | 381.995  | LOC_Os08g41990.1 |
| DG <sub>HP</sub> | Os011617_01 | S5 | 0.000  | -1.373 | P | 463.515  | P | 489.670  | P | 1268.450 | LOC_Os07g04990.2 |
| DG <sub>HP</sub> | Os011642_01 | S5 | 1.483  | 0.000  | P | 327.510  | P | 915.598  | P | 667.187  | LOC_Os10g11140.1 |
| DG <sub>HP</sub> | Os011643_01 | S5 | 1.545  | 0.000  | P | 128.869  | P | 375.956  | P | 213.676  | LOC_Os06g14420.1 |
| DG <sub>HP</sub> | Os011647_01 | S5 | 1.690  | 0.000  | P | 300.805  | P | 970.299  | P | 472.159  | LOC_Os02g51020.1 |
| DG <sub>HP</sub> | Os011660_01 | S5 | 1.493  | 0.000  | P | 1225.279 | P | 3447.648 | P | 4417.228 | LOC_Os06g45820.1 |
| DG <sub>HP</sub> | Os011662_01 | S5 | 0.000  | -1.782 | P | 2151.089 | P | 1660.779 | P | 5710.502 | LOC_Os07g34570.2 |
| DG <sub>HP</sub> | Os011667_01 | S5 | 0.000  | 1.236  | P | 1834.736 | P | 907.206  | P | 385.072  | LOC_Os01g60430.1 |

|                  |             |    |        |        |   |          |   |          |   |          |                  |
|------------------|-------------|----|--------|--------|---|----------|---|----------|---|----------|------------------|
| DG <sub>HP</sub> | Os011733_01 | S5 | 1.758  | 0.000  | P | 1414.719 | P | 4784.119 | P | 4297.251 | LOC_Os06g51029.1 |
| DG <sub>HP</sub> | Os011734_01 | S5 | 1.257  | 0.000  | P | 238.804  | P | 570.647  | P | 305.867  | LOC_Os08g35620.1 |
| DG <sub>HP</sub> | Os011767_01 | S5 | 0.000  | -1.479 | P | 573.110  | P | 427.729  | P | 1192.606 | LOC_Os06g09679.2 |
| DG <sub>HP</sub> | Os011776_01 | S5 | 1.316  | 0.000  | P | 172.970  | P | 430.505  | P | 482.945  | LOC_Os06g09330.1 |
| DG <sub>HP</sub> | Os011780_01 | S5 | 1.449  | 0.000  | P | 135.431  | P | 369.711  | P | 296.447  | LOC_Os01g66300.1 |
| DG <sub>HP</sub> | Os011824_01 | S5 | 10.000 | -1.648 | A | 127.966  | P | 220.144  | P | 689.916  | LOC_Os09g27420.1 |
| DG <sub>HP</sub> | Os011849_01 | S5 | 0.000  | 2.011  | P | 505.227  | P | 485.088  | P | 120.363  | LOC_Os09g36230.1 |
| DG <sub>HP</sub> | Os011859_01 | S5 | 1.455  | 0.000  | P | 221.460  | P | 607.069  | P | 555.079  | LOC_Os11g08670.1 |
| DG <sub>HP</sub> | Os011915_01 | S5 | 0.000  | -1.141 | P | 921.947  | P | 1224.187 | P | 2699.366 | LOC_Os05g49800.1 |
| DG <sub>HP</sub> | Os011930_01 | S5 | 1.432  | 0.000  | P | 213.811  | P | 576.833  | P | 450.050  | LOC_Os08g38460.1 |
| DG <sub>HP</sub> | Os011942_01 | S5 | 1.184  | 0.000  | P | 504.249  | P | 1145.744 | P | 913.011  | LOC_Os02g57620.1 |
| DG <sub>HP</sub> | Os011961_01 | S5 | 1.324  | 10.000 | P | 105.796  | P | 264.888  | A | 101.097  | LOC_Os01g51290.2 |
| DG <sub>HP</sub> | Os011973_01 | S5 | 0.000  | -1.213 | P | 224.026  | P | 239.103  | P | 554.283  | LOC_Os09g25760.1 |
| DG <sub>HP</sub> | Os012032_01 | S5 | 0.000  | -1.291 | P | 284.847  | P | 220.563  | P | 539.789  | LOC_Os06g39370.1 |
| DG <sub>HP</sub> | Os012058_01 | S5 | 1.461  | 0.000  | P | 105.455  | P | 290.356  | P | 220.445  | LOC_Os01g25990.1 |
| DG <sub>HP</sub> | Os012159_01 | S5 | 10.000 | -1.187 | A | 101.487  | P | 194.905  | P | 443.813  | LOC_Os12g01140.1 |
| DG <sub>HP</sub> | Os012349_01 | S5 | 0.000  | -1.164 | P | 572.270  | P | 455.642  | P | 1021.300 | LOC_Os03g61220.1 |
| DG <sub>HP</sub> | Os012355_01 | S5 | -1.324 | 0.000  | P | 968.240  | P | 386.729  | P | 659.668  | LOC_Os06g10650.1 |
| DG <sub>HP</sub> | Os012417_01 | S5 | 0.000  | -1.658 | P | 250.357  | P | 261.644  | P | 825.813  | LOC_Os04g47360.1 |
| DG <sub>HP</sub> | Os012487_01 | S5 | 0.000  | -1.438 | P | 3799.975 | P | 2065.971 | P | 5597.069 | LOC_Os07g29410.1 |
| DG <sub>HP</sub> | Os012505_01 | S5 | 1.518  | 1.417  | P | 179.189  | P | 513.230  | P | 192.220  | LOC_Os04g48390.1 |
| DG <sub>HP</sub> | Os012543_01 | S5 | 1.519  | 0.000  | P | 253.671  | P | 726.839  | P | 550.687  | LOC_Os05g07632.1 |
| DG <sub>HP</sub> | Os012563_01 | S5 | 0.000  | -1.234 | P | 836.702  | P | 1117.782 | P | 2629.447 | LOC_Os12g12850.2 |
| DG <sub>HP</sub> | Os012603_01 | S5 | 1.199  | 1.343  | P | 1776.706 | P | 4079.517 | P | 1607.999 | LOC_Os08g45190.1 |
| DG <sub>HP</sub> | Os012754_01 | S5 | 10.000 | -1.092 | A | 124.827  | P | 304.050  | P | 648.139  | LOC_Os03g45400.1 |
| DG <sub>HP</sub> | Os012774_01 | S5 | 0.000  | -1.242 | P | 212.314  | P | 171.648  | P | 405.962  | LOC_Os04g20164.2 |
| DG <sub>HP</sub> | Os012829_01 | S5 | 1.192  | -1.560 | P | 202.432  | P | 462.623  | P | 1364.366 | LOC_Os01g18630.1 |
| DG <sub>HP</sub> | Os012841_01 | S5 | 1.922  | 0.000  | P | 276.958  | P | 1049.319 | P | 1293.527 | LOC_Os05g16430.1 |
| DG <sub>HP</sub> | Os012869_01 | S5 | -1.086 | 0.000  | P | 1259.690 | P | 593.290  | P | 822.274  | LOC_Os02g08230.1 |
| DG <sub>HP</sub> | Os012870_01 | S5 | 1.489  | 0.000  | P | 258.332  | P | 725.028  | P | 793.571  | LOC_Os03g03670.1 |
| DG <sub>HP</sub> | Os012876_01 | S5 | 1.318  | 0.000  | P | 663.491  | P | 1653.729 | P | 1995.497 | LOC_Os05g50550.1 |

|                  |             |    |        |        |   |          |   |          |   |          |                  |
|------------------|-------------|----|--------|--------|---|----------|---|----------|---|----------|------------------|
| DG <sub>HP</sub> | Os012910_01 | S5 | 1.750  | 0.000  | P | 340.312  | P | 1144.547 | P | 1404.248 | LOC_Os12g38170.1 |
| DG <sub>HP</sub> | Os012917_01 | S5 | 1.206  | 0.000  | P | 236.410  | P | 545.251  | P | 651.281  | LOC_Os01g22520.1 |
| DG <sub>HP</sub> | Os012921_01 | S5 | 1.656  | 0.000  | P | 954.789  | P | 3009.029 | P | 2920.771 | LOC_Os04g56240.1 |
| DG <sub>HP</sub> | Os012945_01 | S5 | 1.275  | 0.000  | P | 171.241  | P | 414.530  | P | 424.136  | LOC_Os03g60120.1 |
| DG <sub>HP</sub> | Os012959_01 | S5 | 0.000  | -1.110 | P | 177.519  | P | 150.522  | P | 324.958  | LOC_Os02g51410.1 |
| DG <sub>HP</sub> | Os013059_01 | S5 | 1.531  | 0.000  | P | 184.051  | P | 531.945  | P | 450.539  | LOC_Os03g06630.1 |
| DG <sub>HP</sub> | Os013071_01 | S5 | 0.000  | 1.241  | P | 292.008  | P | 294.377  | P | 124.579  | LOC_Os10g04429.1 |
| DG <sub>HP</sub> | Os013145_01 | S5 | 1.823  | 0.000  | P | 339.961  | P | 1202.910 | P | 1067.217 | LOC_Os02g38820.1 |
| DG <sub>HP</sub> | Os013289_01 | S5 | 0.000  | -1.104 | P | 173.517  | P | 198.432  | P | 426.563  | LOC_Os09g17600.3 |
| DG <sub>HP</sub> | Os013297_01 | S5 | 10.000 | -1.066 | A | 131.417  | P | 262.460  | P | 549.321  | LOC_Os01g56200.1 |
| DG <sub>HP</sub> | Os013316_01 | S5 | 10.000 | -1.443 | A | 104.583  | P | 207.748  | P | 564.650  | LOC_Os03g20640.1 |
| DG <sub>HP</sub> | Os013325_01 | S5 | 1.208  | 0.000  | P | 157.597  | P | 364.129  | P | 500.545  | LOC_Os08g39860.2 |
| DG <sub>HP</sub> | Os013346_01 | S5 | 10.000 | 1.516  | A | 84.927   | P | 544.232  | P | 190.250  | LOC_Os04g51610.1 |
| DG <sub>HP</sub> | Os013356_01 | S5 | 1.856  | -1.492 | P | 186.933  | P | 676.535  | P | 1903.027 | LOC_Os07g40974.1 |
| DG <sub>HP</sub> | Os013389_01 | S5 | 1.336  | 0.000  | P | 547.215  | P | 1381.199 | P | 1165.631 | LOC_Os09g36220.1 |
| DG <sub>HP</sub> | Os013398_01 | S5 | 0.000  | -1.445 | P | 636.572  | P | 480.359  | P | 1307.615 | LOC_Os03g20700.2 |
| DG <sub>HP</sub> | Os013426_01 | S5 | 0.000  | -1.173 | P | 376.294  | P | 843.536  | P | 1902.172 | LOC_Os12g35630.1 |
| DG <sub>HP</sub> | Os013432_01 | S5 | 2.352  | 0.000  | P | 145.954  | P | 745.364  | P | 402.921  | -                |
| DG <sub>HP</sub> | Os013439_01 | S5 | 1.342  | 0.000  | P | 123.407  | P | 312.925  | P | 187.149  | LOC_Os02g02770.1 |
| DG <sub>HP</sub> | Os013447_01 | S5 | -1.318 | 1.407  | P | 1848.274 | P | 741.169  | P | 279.587  | LOC_Os02g34600.1 |
| DG <sub>HP</sub> | Os013456_01 | S5 | 1.469  | 0.000  | P | 290.381  | P | 804.074  | P | 918.796  | LOC_Os05g38640.1 |
| DG <sub>HP</sub> | Os013650_01 | S5 | 1.195  | 0.000  | P | 180.492  | P | 413.265  | P | 807.942  | LOC_Os02g22780.1 |
| DG <sub>HP</sub> | Os013659_01 | S5 | 1.238  | 0.000  | P | 301.389  | P | 711.128  | P | 375.959  | LOC_Os03g60080.1 |
| DG <sub>HP</sub> | Os013716_01 | S5 | 0.000  | -1.076 | P | 324.700  | P | 211.685  | P | 446.209  | LOC_Os05g51240.1 |
| DG <sub>HP</sub> | Os013733_01 | S5 | 1.284  | 0.000  | P | 409.568  | P | 997.619  | P | 716.533  | LOC_Os05g04620.1 |
| DG <sub>HP</sub> | Os013891_01 | S5 | 1.391  | 0.000  | P | 161.292  | P | 423.044  | P | 405.223  | LOC_Os12g18110.1 |
| DG <sub>HP</sub> | Os013935_01 | S5 | 1.190  | 0.000  | P | 732.131  | P | 1670.284 | P | 1697.857 | LOC_Os03g63480.2 |
| DG <sub>HP</sub> | Os013937_01 | S5 | 0.000  | -1.149 | P | 685.503  | P | 761.777  | P | 1689.152 | LOC_Os05g07860.1 |
| DG <sub>HP</sub> | Os013976_01 | S5 | 0.000  | -1.073 | P | 1614.997 | P | 1671.534 | P | 3516.280 | LOC_Os10g35370.2 |
| DG <sub>HP</sub> | Os013983_01 | S5 | 1.431  | 0.000  | P | 108.127  | P | 291.588  | P | 226.242  | LOC_Os01g47350.1 |
| DG <sub>HP</sub> | Os014001_01 | S5 | 1.634  | 0.000  | P | 520.156  | P | 1614.786 | P | 1336.709 | -                |

|                  |             |    |        |        |   |          |   |          |   |          |                  |
|------------------|-------------|----|--------|--------|---|----------|---|----------|---|----------|------------------|
| DG <sub>HP</sub> | Os014087_01 | S5 | 0.000  | -1.110 | P | 650.340  | P | 773.282  | P | 1669.089 | -                |
| DG <sub>HP</sub> | Os014192_01 | S5 | 1.426  | 0.000  | P | 419.376  | P | 1126.932 | P | 1342.100 | LOC_Os03g20790.1 |
| DG <sub>HP</sub> | Os014200_01 | S5 | 0.000  | -1.298 | P | 273.233  | P | 244.504  | P | 601.099  | LOC_Os03g52680.1 |
| DG <sub>HP</sub> | Os014203_01 | S5 | 10.000 | -1.548 | A | 113.086  | P | 166.161  | P | 485.754  | LOC_Os12g25180.1 |
| DG <sub>HP</sub> | Os014249_01 | S5 | 10.000 | -1.925 | A | 203.324  | P | 358.352  | P | 1360.822 | LOC_Os06g28194.1 |
| DG <sub>HP</sub> | Os014255_01 | S5 | 0.000  | -1.861 | P | 312.668  | P | 241.686  | P | 878.114  | LOC_Os03g52690.1 |
| DG <sub>HP</sub> | Os014285_01 | S5 | 1.216  | 0.000  | P | 467.758  | P | 1086.867 | P | 2223.613 | LOC_Os08g14440.2 |
| DG <sub>HP</sub> | Os014301_01 | S5 | 1.258  | 0.000  | P | 577.708  | P | 1382.102 | P | 781.939  | -                |
| DG <sub>HP</sub> | Os014320_01 | S5 | 1.726  | 0.000  | P | 357.867  | P | 1184.174 | P | 1554.781 | LOC_Os03g17570.3 |
| DG <sub>HP</sub> | Os014326_01 | S5 | 1.234  | 0.000  | P | 150.058  | P | 352.866  | P | 332.855  | LOC_Os07g13530.1 |
| DG <sub>HP</sub> | Os014364_01 | S5 | 0.000  | -3.668 | P | 574.168  | P | 423.839  | P | 5386.469 | LOC_Os01g45914.1 |
| DG <sub>HP</sub> | Os014442_01 | S5 | 1.301  | 2.056  | P | 342.990  | P | 845.208  | P | 203.198  | LOC_Os04g53190.2 |
| DG <sub>HP</sub> | Os014456_01 | S5 | 1.228  | 0.000  | P | 118.601  | P | 277.843  | P | 218.931  | LOC_Os01g64650.3 |
| DG <sub>HP</sub> | Os014473_01 | S5 | 0.000  | -1.065 | P | 456.439  | P | 473.219  | P | 990.166  | LOC_Os01g48990.1 |
| DG <sub>HP</sub> | Os014538_01 | S5 | 1.361  | 0.000  | P | 1496.592 | P | 3842.933 | P | 6820.393 | LOC_Os06g51220.4 |
| DG <sub>HP</sub> | Os014717_01 | S5 | 2.428  | 0.000  | P | 707.821  | P | 3808.980 | P | 1916.763 | LOC_Os06g21380.1 |
| DG <sub>HP</sub> | Os014730_01 | S5 | -1.076 | 0.000  | P | 873.169  | P | 414.249  | P | 227.776  | LOC_Os01g59350.2 |
| DG <sub>HP</sub> | Os014758_01 | S5 | 0.000  | -1.130 | P | 198.237  | P | 220.375  | P | 482.270  | LOC_Os01g13120.1 |
| DG <sub>HP</sub> | Os014760_01 | S5 | 1.592  | 0.000  | P | 682.099  | P | 2056.917 | P | 946.205  | LOC_Os04g37710.1 |
| DG <sub>HP</sub> | Os014800_01 | S5 | 1.861  | 0.000  | P | 183.588  | P | 666.979  | P | 347.701  | LOC_Os05g50560.1 |
| DG <sub>HP</sub> | Os014816_01 | S5 | 10.000 | 1.218  | A | 102.535  | P | 282.667  | P | 121.505  | LOC_Os03g16170.1 |
| DG <sub>HP</sub> | Os014849_01 | S5 | 0.000  | -1.474 | P | 268.163  | P | 286.771  | P | 796.896  | LOC_Os06g04510.1 |
| DG <sub>HP</sub> | Os015095_01 | S5 | 0.000  | -2.124 | P | 199.667  | P | 264.165  | P | 1151.335 | LOC_Os01g73450.1 |
| DG <sub>HP</sub> | Os015303_01 | S5 | 1.655  | 0.000  | P | 256.634  | P | 808.033  | P | 1285.407 | LOC_Os04g37690.1 |
| DG <sub>HP</sub> | Os015340_01 | S5 | 1.335  | 0.000  | P | 505.897  | P | 1276.684 | P | 1252.690 | -                |
| DG <sub>HP</sub> | Os015378_01 | S5 | 0.000  | 1.626  | P | 449.111  | P | 463.261  | P | 150.121  | LOC_Os12g39970.4 |
| DG <sub>HP</sub> | Os015676_01 | S5 | 0.000  | -1.195 | P | 306.694  | P | 246.937  | P | 565.340  | LOC_Os06g47640.1 |
| DG <sub>HP</sub> | Os015702_01 | S5 | 1.411  | 0.000  | P | 324.426  | P | 862.605  | P | 564.222  | LOC_Os01g03310.1 |
| DG <sub>HP</sub> | Os015728_01 | S5 | 1.321  | 0.000  | P | 355.321  | P | 887.824  | P | 768.664  | LOC_Os01g70520.1 |
| DG <sub>HP</sub> | Os015790_01 | S5 | 1.232  | 1.463  | P | 514.465  | P | 1208.612 | P | 438.446  | -                |
| DG <sub>HP</sub> | Os015860_01 | S5 | 1.507  | 0.000  | P | 147.879  | P | 420.313  | P | 235.589  | LOC_Os01g56180.1 |

|                  |             |    |        |        |   |          |   |          |   |          |                  |
|------------------|-------------|----|--------|--------|---|----------|---|----------|---|----------|------------------|
| DG <sub>HP</sub> | Os015868_01 | S5 | 1.205  | 1.249  | P | 179.480  | P | 413.657  | P | 174.048  | LOC_Os03g13540.1 |
| DG <sub>HP</sub> | Os015899_01 | S5 | 0.000  | 1.709  | P | 2082.620 | P | 1168.179 | P | 357.229  | LOC_Os12g42610.1 |
| DG <sub>HP</sub> | Os015905_01 | S5 | 0.000  | -1.125 | P | 567.032  | P | 873.868  | P | 1905.705 | LOC_Os08g44290.1 |
| DG <sub>HP</sub> | Os015910_01 | S5 | 1.859  | 1.686  | P | 243.485  | P | 883.224  | P | 274.496  | LOC_Os01g10250.1 |
| DG <sub>HP</sub> | Os015957_01 | S5 | 0.000  | 1.344  | P | 726.055  | P | 541.350  | P | 213.292  | LOC_Os05g51780.1 |
| DG <sub>HP</sub> | Os016013_01 | S5 | 0.000  | 1.295  | P | 735.587  | P | 626.355  | P | 255.327  | LOC_Os06g09540.1 |
| DG <sub>HP</sub> | Os016057_01 | S5 | 0.000  | 1.351  | P | 1287.604 | P | 1083.911 | P | 424.794  | LOC_Os08g43500.1 |
| DG <sub>HP</sub> | Os016064_01 | S5 | 1.451  | 0.000  | P | 154.365  | P | 421.915  | P | 253.399  | LOC_Os03g59180.2 |
| DG <sub>HP</sub> | Os016076_01 | S5 | -1.154 | 1.285  | P | 3598.953 | P | 1616.797 | P | 663.617  | LOC_Os03g01260.1 |
| DG <sub>HP</sub> | Os016132_01 | S5 | 1.479  | 0.000  | P | 210.114  | P | 585.859  | P | 1131.380 | LOC_Os04g14190.1 |
| DG <sub>HP</sub> | Os016227_01 | S5 | 1.469  | 0.000  | P | 770.356  | P | 2133.254 | P | 1686.775 | LOC_Os12g08810.1 |
| DG <sub>HP</sub> | Os016309_01 | S5 | 1.570  | 0.000  | P | 543.461  | P | 1613.731 | P | 1709.066 | LOC_Os10g28360.1 |
| DG <sub>HP</sub> | Os016500_01 | S5 | 1.263  | 0.000  | P | 1810.264 | P | 4344.407 | P | 4187.984 | LOC_Os02g57280.1 |
| DG <sub>HP</sub> | Os016527_01 | S5 | 0.000  | 1.397  | P | 405.911  | P | 349.677  | P | 132.741  | LOC_Os03g60220.1 |
| DG <sub>HP</sub> | Os016575_01 | S5 | 0.000  | -1.150 | P | 467.455  | P | 1022.012 | P | 2267.393 | LOC_Os01g40630.1 |
| DG <sub>HP</sub> | Os016615_01 | S5 | 0.000  | -2.244 | P | 834.222  | P | 1186.503 | P | 5621.190 | LOC_Os11g05050.2 |
| DG <sub>HP</sub> | Os016638_01 | S5 | 1.451  | 0.000  | P | 206.023  | P | 563.257  | P | 578.111  | -                |
| DG <sub>HP</sub> | Os016661_01 | S5 | 1.272  | 0.000  | P | 289.977  | P | 700.196  | P | 992.199  | LOC_Os08g25734.1 |
| DG <sub>HP</sub> | Os016716_01 | S5 | 1.969  | 0.000  | P | 609.111  | P | 2385.464 | P | 1633.202 | LOC_Os02g10120.1 |
| DG <sub>HP</sub> | Os016757_01 | S5 | 1.712  | 1.711  | P | 268.768  | P | 880.397  | P | 268.859  | LOC_Os01g62760.1 |
| DG <sub>HP</sub> | Os016758_01 | S5 | 1.414  | 0.000  | P | 260.039  | P | 693.042  | P | 517.033  | LOC_Os11g32110.4 |
| DG <sub>HP</sub> | Os016793_01 | S5 | 1.506  | 1.907  | P | 192.869  | P | 547.963  | P | 146.085  | LOC_Os02g52780.1 |
| DG <sub>HP</sub> | Os016867_01 | S5 | 0.000  | -1.313 | P | 271.398  | P | 243.897  | P | 605.921  | LOC_Os08g43390.1 |
| DG <sub>HP</sub> | Os016878_01 | S5 | 1.396  | 0.000  | P | 2395.802 | P | 6304.712 | P | 4742.440 | LOC_Os02g18450.1 |
| DG <sub>HP</sub> | Os016919_01 | S5 | 3.169  | 3.644  | P | 384.618  | P | 3458.992 | P | 276.757  | LOC_Os02g01590.1 |
| DG <sub>HP</sub> | Os016921_01 | S5 | 0.000  | -1.358 | P | 167.872  | P | 195.766  | P | 501.765  | LOC_Os07g47290.1 |
| DG <sub>HP</sub> | Os017113_01 | S5 | 1.245  | 0.000  | P | 360.280  | P | 854.069  | P | 1175.449 | LOC_Os03g63770.6 |
| DG <sub>HP</sub> | Os017115_01 | S5 | 1.278  | 0.000  | P | 559.488  | P | 1356.415 | P | 1920.215 | LOC_Os12g42550.1 |
| DG <sub>HP</sub> | Os017277_01 | S5 | -1.273 | 1.572  | P | 2303.234 | P | 952.797  | P | 320.541  | LOC_Os01g66510.1 |
| DG <sub>HP</sub> | Os017305_01 | S5 | -1.598 | 1.872  | P | 2814.602 | P | 929.550  | P | 253.864  | -                |
| DG <sub>HP</sub> | Os017376_01 | S5 | 1.801  | 1.351  | P | 364.177  | P | 1269.452 | P | 497.498  | LOC_Os07g48100.1 |

|                  |             |    |        |        |   |          |   |          |   |           |                  |
|------------------|-------------|----|--------|--------|---|----------|---|----------|---|-----------|------------------|
| DG <sub>HP</sub> | Os017465_01 | S5 | 0.000  | -1.971 | P | 2707.336 | P | 1349.421 | P | 5291.228  | LOC_Os07g48500.1 |
| DG <sub>HP</sub> | Os017515_01 | S5 | 10.000 | 1.347  | A | 112.634  | P | 415.705  | P | 163.440   | LOC_Os06g48990.2 |
| DG <sub>HP</sub> | Os017521_01 | S5 | 0.000  | -1.590 | P | 234.245  | P | 186.544  | P | 561.437   | LOC_Os06g03720.1 |
| DG <sub>HP</sub> | Os017708_01 | S5 | 1.252  | 0.000  | P | 144.993  | P | 345.414  | P | 483.338   | -                |
| DG <sub>HP</sub> | Os017842_01 | S5 | 0.000  | -1.333 | P | 229.912  | P | 182.341  | P | 459.488   | LOC_Os01g59980.1 |
| DG <sub>HP</sub> | Os017873_01 | S5 | 10.000 | 3.003  | A | 1435.486 | P | 1287.132 | P | 160.589   | LOC_Os11g25860.1 |
| DG <sub>HP</sub> | Os017943_01 | S5 | 0.000  | 1.357  | P | 727.284  | P | 1322.413 | P | 516.310   | LOC_Os07g12340.1 |
| DG <sub>HP</sub> | Os017944_01 | S5 | 0.000  | -1.967 | P | 1843.577 | P | 2088.748 | P | 8168.542  | LOC_Os04g18090.1 |
| DG <sub>HP</sub> | Os018037_01 | S5 | 0.000  | 1.340  | P | 551.472  | P | 561.912  | P | 222.029   | LOC_Os02g43790.1 |
| DG <sub>HP</sub> | Os018138_01 | S5 | 1.614  | 0.000  | P | 157.816  | P | 482.909  | P | 625.824   | LOC_Os10g36000.2 |
| DG <sub>HP</sub> | Os018201_01 | S5 | 1.632  | 0.000  | P | 145.963  | P | 452.519  | P | 282.520   | LOC_Os07g05570.1 |
| DG <sub>HP</sub> | Os018221_01 | S5 | 0.000  | -2.574 | P | 307.140  | P | 155.719  | P | 927.178   | -                |
| DG <sub>HP</sub> | Os018288_01 | S5 | 1.427  | 0.000  | P | 341.153  | P | 917.001  | P | 611.798   | LOC_Os02g37970.1 |
| DG <sub>HP</sub> | Os018289_01 | S5 | 1.264  | 0.000  | P | 1734.605 | P | 4165.209 | P | 3123.834  | LOC_Os10g42299.2 |
| DG <sub>HP</sub> | Os018342_01 | S5 | 0.000  | -1.082 | P | 287.594  | P | 336.434  | P | 712.244   | LOC_Os03g06620.1 |
| DG <sub>HP</sub> | Os018393_01 | S5 | 1.345  | 0.000  | P | 1191.452 | P | 3027.083 | P | 2484.542  | LOC_Os09g38090.1 |
| DG <sub>HP</sub> | Os018397_01 | S5 | 0.000  | -2.122 | P | 142.125  | P | 156.181  | P | 679.924   | LOC_Os08g04450.4 |
| DG <sub>HP</sub> | Os018414_01 | S5 | -1.079 | -1.730 | P | 515.735  | P | 244.080  | P | 809.834   | LOC_Os07g28910.1 |
| DG <sub>HP</sub> | Os018478_01 | S5 | 1.664  | 0.000  | P | 226.005  | P | 716.163  | P | 431.205   | LOC_Os05g05160.1 |
| DG <sub>HP</sub> | Os018515_01 | S5 | 0.000  | -1.194 | P | 534.648  | P | 696.285  | P | 1593.123  | LOC_Os02g43500.2 |
| DG <sub>HP</sub> | Os018518_01 | S5 | 1.312  | 0.000  | P | 188.486  | P | 467.865  | P | 432.062   | LOC_Os07g38360.2 |
| DG <sub>HP</sub> | Os018541_01 | S5 | 0.000  | -1.431 | P | 475.239  | P | 583.875  | P | 1573.826  | LOC_Os06g43660.1 |
| DG <sub>HP</sub> | Os018714_01 | S5 | 0.000  | -1.427 | P | 257.122  | P | 278.108  | P | 747.575   | LOC_Os01g53020.1 |
| DG <sub>HP</sub> | Os018776_01 | S5 | 0.000  | -1.432 | P | 1193.349 | P | 783.239  | P | 2113.238  | LOC_Os08g03290.1 |
| DG <sub>HP</sub> | Os018786_01 | S5 | 1.710  | 1.646  | P | 178.933  | P | 585.568  | P | 187.116   | LOC_Os03g16670.1 |
| DG <sub>HP</sub> | Os018804_01 | S5 | 0.000  | 1.561  | P | 722.143  | P | 434.253  | P | 147.164   | LOC_Os04g40520.1 |
| DG <sub>HP</sub> | Os018929_01 | S5 | 0.000  | -1.375 | P | 235.402  | P | 402.742  | P | 1044.417  | LOC_Os01g09540.1 |
| DG <sub>HP</sub> | Os018940_01 | S5 | 0.000  | 1.520  | P | 1193.468 | P | 844.884  | P | 294.550   | LOC_Os06g49700.2 |
| DG <sub>HP</sub> | Os018960_01 | S5 | 1.563  | 0.000  | P | 2970.030 | P | 8774.923 | P | 12830.056 | LOC_Os03g52840.1 |
| DG <sub>HP</sub> | Os018983_01 | S5 | 0.000  | -1.664 | P | 671.961  | P | 429.862  | P | 1362.272  | LOC_Os04g56160.1 |
| DG <sub>HP</sub> | Os019004_01 | S5 | 1.287  | 0.000  | P | 187.453  | P | 457.505  | P | 255.400   | LOC_Os10g37340.1 |

|                  |             |    |        |        |   |          |   |          |   |          |                  |
|------------------|-------------|----|--------|--------|---|----------|---|----------|---|----------|------------------|
| DG <sub>HP</sub> | Os019026_01 | S5 | 0.000  | 2.183  | P | 1093.322 | P | 658.356  | P | 144.999  | -                |
| DG <sub>HP</sub> | Os019071_01 | S5 | 0.000  | -1.092 | P | 283.697  | P | 235.572  | P | 502.025  | LOC_Os02g38840.2 |
| DG <sub>HP</sub> | Os019111_01 | S5 | 1.362  | 0.000  | P | 207.038  | P | 532.041  | P | 302.098  | LOC_Os07g43330.1 |
| DG <sub>HP</sub> | Os019113_01 | S5 | 0.000  | -1.321 | P | 434.734  | P | 397.476  | P | 992.794  | LOC_Os12g17910.1 |
| DG <sub>HP</sub> | Os019140_01 | S5 | 0.000  | -1.206 | P | 651.254  | P | 448.774  | P | 1035.563 | -                |
| DG <sub>HP</sub> | Os019258_01 | S5 | 0.000  | 2.649  | P | 1424.743 | P | 1127.643 | P | 179.785  | LOC_Os03g46190.2 |
| DG <sub>HP</sub> | Os019275_01 | S5 | 0.000  | -1.253 | P | 234.724  | P | 219.354  | P | 522.913  | LOC_Os01g69970.1 |
| DG <sub>HP</sub> | Os019287_01 | S5 | 0.000  | -1.881 | P | 269.977  | P | 363.239  | P | 1337.977 | LOC_Os01g65080.3 |
| DG <sub>HP</sub> | Os019597_01 | S5 | 0.000  | -2.234 | P | 262.492  | P | 179.021  | P | 842.297  | LOC_Os11g10520.1 |
| DG <sub>HP</sub> | Os019607_01 | S5 | 0.000  | -1.847 | P | 172.358  | P | 170.567  | P | 613.592  | LOC_Os03g53670.1 |
| DG <sub>HP</sub> | Os019634_01 | S5 | 0.000  | -1.076 | P | 1372.939 | P | 814.463  | P | 1716.969 | LOC_Os06g02380.2 |
| DG <sub>HP</sub> | Os019636_01 | S5 | 1.503  | 0.000  | P | 621.383  | P | 1761.298 | P | 1317.008 | -                |
| DG <sub>HP</sub> | Os019825_01 | S5 | 1.491  | 0.000  | P | 480.148  | P | 1349.334 | P | 1631.305 | LOC_Os05g34070.1 |
| DG <sub>HP</sub> | Os020028_01 | S5 | 1.253  | 0.000  | P | 331.368  | P | 789.900  | P | 736.952  | LOC_Os02g03260.1 |
| DG <sub>HP</sub> | Os020055_01 | S5 | 1.366  | 0.000  | P | 116.157  | P | 299.338  | P | 158.019  | LOC_Os02g47980.1 |
| DG <sub>HP</sub> | Os020137_01 | S5 | 1.201  | 0.000  | P | 318.510  | P | 732.385  | P | 1077.991 | LOC_Os06g41670.1 |
| DG <sub>HP</sub> | Os020261_01 | S5 | 1.609  | 0.000  | P | 107.851  | P | 328.926  | P | 269.122  | LOC_Os01g04950.3 |
| DG <sub>HP</sub> | Os020383_01 | S5 | -1.080 | 10.000 | P | 1789.931 | P | 846.913  | A | 204.563  | LOC_Os02g50320.1 |
| DG <sub>HP</sub> | Os020610_01 | S5 | 0.000  | -1.292 | P | 184.850  | P | 153.478  | P | 375.712  | LOC_Os01g55290.3 |
| DG <sub>HP</sub> | Os020633_01 | S5 | 0.000  | -1.188 | P | 195.295  | P | 274.580  | P | 625.745  | LOC_Os09g30120.1 |
| DG <sub>HP</sub> | Os020653_01 | S5 | 2.133  | 1.510  | P | 202.305  | P | 887.333  | P | 311.638  | LOC_Os11g05990.1 |
| DG <sub>HP</sub> | Os020732_01 | S5 | 0.000  | -1.406 | P | 245.266  | P | 200.512  | P | 531.411  | LOC_Os05g05950.1 |
| DG <sub>HP</sub> | Os020837_01 | S5 | 1.373  | 0.000  | P | 204.937  | P | 530.775  | P | 570.641  | LOC_Os03g43750.1 |
| DG <sub>HP</sub> | Os020886_01 | S5 | 1.201  | 0.000  | P | 140.659  | P | 323.430  | P | 289.924  | LOC_Os03g59470.1 |
| DG <sub>HP</sub> | Os020903_01 | S5 | 1.255  | 0.000  | P | 689.968  | P | 1646.476 | P | 1518.669 | LOC_Os03g17870.1 |
| DG <sub>HP</sub> | Os020962_01 | S5 | 10.000 | 1.616  | A | 203.670  | P | 626.995  | P | 204.569  | LOC_Os10g41930.2 |
| DG <sub>HP</sub> | Os020969_01 | S5 | -1.159 | 0.000  | P | 1611.947 | P | 722.117  | P | 386.560  | LOC_Os08g08800.1 |
| DG <sub>HP</sub> | Os021048_01 | S5 | 0.000  | -1.082 | P | 640.502  | P | 453.168  | P | 959.173  | LOC_Os01g63270.1 |
| DG <sub>HP</sub> | Os021156_01 | S5 | 1.357  | 10.000 | P | 85.960   | P | 220.241  | A | 122.561  | LOC_Os12g43720.1 |
| DG <sub>HP</sub> | Os021165_01 | S5 | 1.339  | 0.000  | P | 201.921  | P | 510.684  | P | 352.889  | LOC_Os05g30140.1 |
| DG <sub>HP</sub> | Os021180_01 | S5 | 2.016  | 0.000  | P | 101.370  | P | 409.930  | P | 305.752  | LOC_Os01g65410.1 |



|                  |             |    |        |        |   |          |   |          |   |          |                  |
|------------------|-------------|----|--------|--------|---|----------|---|----------|---|----------|------------------|
| DG <sub>HP</sub> | Os021391_01 | S5 | 1.336  | 0.000  | P | 688.988  | P | 1739.399 | P | 2014.911 | LOC_Os03g12670.2 |
| DG <sub>HP</sub> | Os021445_01 | S5 | 1.577  | 0.000  | P | 1272.870 | P | 3796.959 | P | 1913.529 | LOC_Os08g06110.1 |
| DG <sub>HP</sub> | Os021489_01 | S5 | -1.266 | 0.000  | P | 1100.187 | P | 457.401  | P | 296.598  | LOC_Os09g36990.1 |
| DG <sub>HP</sub> | Os021497_01 | S5 | 1.221  | 0.000  | P | 374.130  | P | 871.944  | P | 900.155  | LOC_Os06g40080.1 |
| DG <sub>HP</sub> | Os021588_01 | S5 | 0.000  | -1.336 | P | 5016.758 | P | 3928.713 | P | 9919.577 | -                |
| DG <sub>HP</sub> | Os021645_01 | S5 | 1.794  | 1.603  | P | 219.791  | P | 762.099  | P | 250.803  | LOC_Os01g12810.4 |
| DG <sub>HP</sub> | Os021689_01 | S5 | -1.104 | 0.000  | P | 5251.987 | P | 2443.431 | P | 2223.826 | LOC_Os03g21790.1 |
| DG <sub>HP</sub> | Os021726_01 | S5 | 1.819  | 1.404  | P | 615.032  | P | 2170.178 | P | 820.279  | LOC_Os03g06080.1 |
| DG <sub>HP</sub> | Os021841_01 | S5 | -1.417 | 0.000  | P | 2577.757 | P | 965.290  | P | 521.262  | LOC_Os08g36410.1 |
| DG <sub>HP</sub> | Os021870_01 | S5 | 0.000  | -1.785 | P | 128.790  | P | 251.443  | P | 866.334  | LOC_Os07g41060.1 |
| DG <sub>HP</sub> | Os021927_01 | S5 | -1.093 | -1.063 | P | 442.746  | P | 207.558  | P | 433.647  | LOC_Os05g32820.1 |
| DG <sub>HP</sub> | Os021929_01 | S5 | 0.000  | 1.504  | P | 291.973  | P | 493.947  | P | 174.150  | LOC_Os09g30414.1 |
| DG <sub>HP</sub> | Os021946_01 | S5 | 1.521  | 0.000  | P | 759.769  | P | 2181.022 | P | 1279.399 | LOC_Os05g50930.1 |
| DG <sub>HP</sub> | Os021978_01 | S5 | 1.310  | 0.000  | P | 978.995  | P | 2427.421 | P | 3295.495 | LOC_Os02g39160.1 |
| DG <sub>HP</sub> | Os021993_01 | S5 | 10.000 | 1.669  | A | 594.459  | P | 444.219  | P | 139.724  | LOC_Os01g34780.2 |
| DG <sub>HP</sub> | Os022000_01 | S5 | 0.000  | -1.130 | P | 1541.486 | P | 1301.759 | P | 2849.007 | LOC_Os10g39410.1 |
| DG <sub>HP</sub> | Os022133_01 | S5 | 1.433  | 0.000  | P | 99.345   | P | 268.206  | P | 155.850  | LOC_Os03g32170.1 |
| DG <sub>HP</sub> | Os022142_01 | S5 | 1.626  | 0.000  | P | 465.259  | P | 1436.337 | P | 706.123  | LOC_Os09g31200.1 |
| DG <sub>HP</sub> | Os022144_01 | S5 | 10.000 | -1.125 | A | 58.825   | P | 271.465  | P | 591.932  | LOC_Os01g35789.1 |
| DG <sub>HP</sub> | Os022157_01 | S5 | 1.481  | 0.000  | P | 438.939  | P | 1224.957 | P | 1069.727 | LOC_Os08g33540.1 |
| DG <sub>HP</sub> | Os022240_01 | S5 | 0.000  | -1.351 | P | 939.735  | P | 1522.834 | P | 3884.913 | LOC_Os05g13620.1 |
| DG <sub>HP</sub> | Os022309_01 | S5 | 1.579  | 0.000  | P | 337.711  | P | 1009.118 | P | 1132.053 | LOC_Os05g10670.1 |
| DG <sub>HP</sub> | Os022480_01 | S5 | 0.000  | 1.561  | P | 515.808  | P | 323.409  | P | 109.643  | LOC_Os01g18220.1 |
| DG <sub>HP</sub> | Os022866_01 | S5 | 1.488  | 10.000 | P | 122.443  | P | 343.358  | A | 113.630  | LOC_Os07g48830.1 |
| DG <sub>HP</sub> | Os023050_01 | S5 | 0.000  | 1.658  | P | 538.223  | P | 568.556  | P | 180.156  | LOC_Os06g02330.1 |
| DG <sub>HP</sub> | Os023056_01 | S5 | 1.562  | 1.442  | P | 125.121  | P | 369.347  | P | 135.960  | LOC_Os04g44530.5 |
| DG <sub>HP</sub> | Os023251_01 | S5 | 1.388  | 0.000  | P | 141.247  | P | 369.753  | P | 389.197  | -                |
| DG <sub>HP</sub> | Os023451_01 | S5 | 1.189  | 0.000  | P | 436.180  | P | 994.703  | P | 499.857  | LOC_Os05g33514.1 |
| DG <sub>HP</sub> | Os023497_01 | S5 | -1.939 | 0.000  | P | 721.248  | P | 188.145  | P | 174.756  | -                |
| DG <sub>HP</sub> | Os023508_01 | S5 | 1.839  | 0.000  | P | 988.925  | P | 3539.031 | P | 2503.083 | LOC_Os08g04430.1 |
| DG <sub>HP</sub> | Os023514_01 | S5 | 0.000  | -1.249 | P | 271.965  | P | 215.972  | P | 513.453  | LOC_Os05g35050.1 |

|                  |             |    |        |        |   |           |   |           |   |          |                  |
|------------------|-------------|----|--------|--------|---|-----------|---|-----------|---|----------|------------------|
| DG <sub>HP</sub> | Os023589_01 | S5 | 10.000 | -1.402 | A | 138.649   | P | 545.549   | P | 1441.504 | LOC_Os05g05650.1 |
| DG <sub>HP</sub> | Os023615_01 | S5 | 1.696  | 0.000  | P | 168.403   | P | 545.604   | P | 1039.256 | -                |
| DG <sub>HP</sub> | Os023652_01 | S5 | 0.000  | 1.222  | P | 393.460   | P | 341.563   | P | 146.389  | LOC_Os04g52750.1 |
| DG <sub>HP</sub> | Os023737_01 | S5 | 0.000  | 1.482  | P | 1569.171  | P | 779.228   | P | 278.951  | -                |
| DG <sub>HP</sub> | Os023774_01 | S5 | 1.742  | 10.000 | P | 107.354   | P | 359.014   | A | 113.516  | LOC_Os09g38320.1 |
| DG <sub>HP</sub> | Os023831_01 | S5 | 1.504  | 1.310  | P | 164.436   | P | 466.348   | P | 188.044  | LOC_Os08g34240.1 |
| DG <sub>HP</sub> | Os023923_01 | S5 | 0.000  | 1.230  | P | 1209.545  | P | 652.352   | P | 278.107  | LOC_Os07g18780.1 |
| DG <sub>HP</sub> | Os023944_01 | S5 | 1.448  | 0.000  | P | 134.640   | P | 367.345   | P | 168.917  | LOC_Os09g28650.1 |
| DG <sub>HP</sub> | Os023983_01 | S5 | 0.000  | -1.072 | P | 394.851   | P | 373.065   | P | 784.076  | LOC_Os02g58500.1 |
| DG <sub>HP</sub> | Os023998_01 | S5 | -1.084 | 0.000  | P | 439.358   | P | 207.296   | P | 170.095  | LOC_Os08g42570.1 |
| DG <sub>HP</sub> | Os024079_01 | S5 | 1.330  | 0.000  | P | 168.484   | P | 423.596   | P | 259.822  | LOC_Os07g24230.1 |
| DG <sub>HP</sub> | Os024100_01 | S5 | 1.372  | -1.091 | P | 142.444   | P | 368.776   | P | 785.472  | LOC_Os05g03750.1 |
| DG <sub>HP</sub> | Os024190_01 | S5 | 0.000  | -1.059 | P | 366.402   | P | 606.354   | P | 1263.307 | LOC_Os01g20160.1 |
| DG <sub>HP</sub> | Os024221_01 | S5 | 0.000  | 1.768  | P | 1414.447  | P | 899.180   | P | 264.029  | -                |
| DG <sub>HP</sub> | Os024254_01 | S5 | 0.000  | 1.370  | P | 281.824   | P | 381.351   | P | 147.536  | LOC_Os09g26780.1 |
| DG <sub>HP</sub> | Os024270_01 | S5 | 0.000  | 1.243  | P | 317.755   | P | 563.322   | P | 238.033  | LOC_Os05g36990.1 |
| DG <sub>HP</sub> | Os024669_01 | S5 | -1.373 | 2.683  | P | 3280.055  | P | 1265.972  | P | 197.163  | LOC_Os07g03170.1 |
| DG <sub>HP</sub> | Os024723_01 | S5 | -1.254 | 0.000  | P | 845.361   | P | 354.524   | P | 212.849  | LOC_Os11g05490.1 |
| DG <sub>HP</sub> | Os024767_01 | S5 | 1.653  | 0.000  | P | 204.448   | P | 642.942   | P | 302.190  | LOC_Os03g59360.1 |
| DG <sub>HP</sub> | Os024796_01 | S5 | 1.209  | 0.000  | P | 207.885   | P | 480.637   | P | 560.109  | LOC_Os02g35500.1 |
| DG <sub>HP</sub> | Os024798_01 | S5 | 1.250  | 0.000  | P | 224.784   | P | 534.780   | P | 654.257  | LOC_Os05g48800.2 |
| DG <sub>HP</sub> | Os024813_01 | S5 | 1.579  | 0.000  | P | 274.992   | P | 821.653   | P | 630.539  | LOC_Os06g06560.1 |
| DG <sub>HP</sub> | Os024863_01 | S5 | 1.488  | 0.000  | P | 129.618   | P | 363.656   | P | 240.064  | LOC_Os03g05800.1 |
| DG <sub>HP</sub> | Os024919_01 | S5 | 0.000  | 1.514  | P | 1718.186  | P | 1188.550  | P | 416.153  | -                |
| DG <sub>HP</sub> | Os024959_01 | S5 | 0.000  | -1.202 | P | 923.354   | P | 755.058   | P | 1737.016 | LOC_Os02g08150.1 |
| DG <sub>HP</sub> | Os025809_01 | S5 | 0.000  | -1.800 | P | 382.891   | P | 277.552   | P | 966.215  | LOC_Os09g15230.1 |
| DG <sub>HP</sub> | Os026266_01 | S5 | 1.486  | 10.000 | P | 436.623   | P | 1222.878  | A | 1749.183 | -                |
| DG <sub>HP</sub> | Os026390_01 | S5 | 0.000  | 1.437  | P | 568.249   | P | 1211.884  | P | 447.552  | LOC_Os05g25040.2 |
| DG <sub>HP</sub> | Os026464_01 | S5 | 0.000  | 1.651  | P | 1608.410  | P | 2132.330  | P | 679.025  | LOC_Os09g34100.1 |
| DG <sub>HP</sub> | Os026558_01 | S5 | 1.578  | 10.000 | P | 269.639   | P | 805.153   | A | 1058.449 | LOC_Os08g42810.1 |
| DG <sub>HP</sub> | Os026917_01 | S5 | 0.000  | 1.513  | P | 10124.574 | P | 14571.149 | P | 5106.447 | LOC_Os04g52250.1 |

|                  |             |    |        |        |   |           |   |           |   |          |                  |
|------------------|-------------|----|--------|--------|---|-----------|---|-----------|---|----------|------------------|
| DG <sub>HP</sub> | Os026920_01 | S5 | 1.382  | 10.000 | P | 401.702   | P | 1046.795  | A | 1488.549 | LOC_Os07g28290.1 |
| DG <sub>HP</sub> | Os027379_02 | S5 | -1.377 | 0.000  | P | 4267.882  | P | 1643.163  | P | 2073.987 | -                |
| DG <sub>HP</sub> | Os027659_01 | S5 | -1.417 | 0.000  | P | 7052.702  | P | 2641.402  | P | 4920.744 | LOC_Os02g02890.1 |
| DG <sub>HP</sub> | Os027678_01 | S5 | 0.000  | 1.281  | P | 949.807   | P | 1161.294  | P | 478.024  | -                |
| DG <sub>HP</sub> | Os027686_01 | S5 | 0.000  | 1.577  | P | 231.451   | P | 505.836   | P | 169.604  | LOC_Os06g04630.1 |
| DG <sub>HP</sub> | Os028382_01 | S5 | 0.000  | -1.076 | P | 299.083   | P | 218.893   | P | 461.433  | LOC_Os06g02580.1 |
| DG <sub>HP</sub> | Os028407_01 | S5 | 1.667  | 10.000 | P | 721.771   | P | 2291.550  | A | 2850.369 | LOC_Os08g44540.1 |
| DG <sub>HP</sub> | Os028605_01 | S5 | -1.245 | 0.000  | P | 1912.992  | P | 807.023   | P | 547.593  | LOC_Os02g06380.1 |
| DG <sub>HP</sub> | Os028680_01 | S5 | 2.012  | 0.000  | P | 198.308   | P | 800.081   | P | 1510.062 | LOC_Os07g06100.1 |
| DG <sub>HP</sub> | Os028785_01 | S5 | 0.000  | 1.317  | P | 31823.651 | P | 21200.934 | P | 8508.819 | LOC_Os02g38450.1 |
| DG <sub>HP</sub> | Os028876_01 | S5 | 1.300  | 0.000  | P | 412.653   | P | 1016.100  | P | 1399.247 | LOC_Os07g40950.1 |
| DG <sub>HP</sub> | Os029195_01 | S5 | -1.178 | 0.000  | P | 552.937   | P | 244.383   | P | 489.340  | LOC_Os01g56420.1 |
| DG <sub>HP</sub> | Os029226_01 | S5 | 0.000  | 1.331  | P | 328.329   | P | 654.902   | P | 260.301  | LOC_Os05g46040.1 |
| DG <sub>HP</sub> | Os029577_01 | S5 | 0.000  | -1.326 | P | 761.859   | P | 383.709   | P | 961.912  | LOC_Os05g50340.1 |
| DG <sub>HP</sub> | Os029694_01 | S5 | -1.236 | 0.000  | P | 1569.632  | P | 666.608   | P | 811.132  | LOC_Os07g41580.1 |
| DG <sub>HP</sub> | Os029713_01 | S5 | 0.000  | 1.687  | P | 3959.518  | P | 1962.690  | P | 609.413  | LOC_Os07g30990.1 |
| DG <sub>HP</sub> | Os030028_01 | S5 | 1.196  | 0.000  | P | 323.428   | P | 740.940   | P | 1504.726 | LOC_Os01g02710.1 |
| DG <sub>HP</sub> | Os030032_01 | S5 | 0.000  | -1.194 | P | 177.921   | P | 247.040   | P | 565.226  | LOC_Os06g48560.1 |
| DG <sub>HP</sub> | Os030167_01 | S5 | 0.000  | -1.768 | P | 266.088   | P | 223.197   | P | 760.193  | LOC_Os01g18584.1 |
| DG <sub>HP</sub> | Os030190_01 | S5 | -1.613 | 0.000  | P | 951.767   | P | 311.200   | P | 402.938  | -                |
| DG <sub>HP</sub> | Os030789_01 | S5 | -1.110 | 10.000 | P | 5357.315  | P | 2482.464  | A | 199.261  | LOC_Os01g48600.1 |
| DG <sub>HP</sub> | Os031095_01 | S5 | 0.000  | -1.881 | P | 190.487   | P | 143.521   | P | 528.493  | LOC_Os02g13350.1 |
| DG <sub>HP</sub> | Os031550_01 | S5 | 1.528  | 0.000  | P | 268.232   | P | 773.544   | P | 942.119  | LOC_Os04g10924.1 |
| DG <sub>HP</sub> | Os031927_01 | S5 | 1.431  | 1.661  | P | 706.732   | P | 1905.262  | P | 602.521  | LOC_Os03g07960.1 |
| DG <sub>HP</sub> | Os032688_01 | S5 | 2.008  | 0.000  | P | 180.626   | P | 726.505   | P | 1121.058 | LOC_Os07g26500.1 |
| DG <sub>HP</sub> | Os032700_01 | S5 | 1.742  | 0.000  | P | 343.706   | P | 1149.688  | P | 1972.215 | LOC_Os10g09900.1 |
| DG <sub>HP</sub> | Os032943_01 | S5 | 1.252  | 0.000  | P | 229.459   | P | 546.359   | P | 788.142  | LOC_Os11g24180.1 |
| DG <sub>HP</sub> | Os032955_01 | S5 | 1.404  | 0.000  | P | 181.957   | P | 481.567   | P | 606.403  | LOC_Os06g28490.1 |
| DG <sub>HP</sub> | Os033341_01 | S5 | 1.690  | 0.000  | P | 448.925   | P | 1448.138  | P | 1982.038 | LOC_Os02g34070.1 |
| DG <sub>HP</sub> | Os033430_01 | S5 | 10.000 | -1.172 | A | 161.926   | P | 560.254   | P | 1262.814 | LOC_Os10g22630.1 |
| DG <sub>HP</sub> | Os033536_01 | S5 | 0.000  | 1.252  | P | 1115.326  | P | 780.230   | P | 327.540  | LOC_Os02g13050.1 |

|                  |             |    |        |        |   |           |   |          |   |           |                  |
|------------------|-------------|----|--------|--------|---|-----------|---|----------|---|-----------|------------------|
| DG <sub>HP</sub> | Os033786_01 | S5 | 1.600  | 2.138  | P | 243.514   | P | 738.242  | P | 167.766   | LOC_Os05g05410.1 |
| DG <sub>HP</sub> | Os034112_01 | S5 | -1.102 | 0.000  | P | 940.166   | P | 437.919  | P | 341.793   | LOC_Os02g40130.1 |
| DG <sub>HP</sub> | Os034119_01 | S5 | 1.418  | 0.000  | P | 294.623   | P | 787.228  | P | 1270.285  | LOC_Os04g08080.1 |
| DG <sub>HP</sub> | Os034125_01 | S5 | 1.266  | 0.000  | P | 351.456   | P | 845.212  | P | 1388.119  | LOC_Os03g08570.1 |
| DG <sub>HP</sub> | Os034439_01 | S5 | 1.872  | 0.000  | P | 998.565   | P | 3653.890 | P | 6758.654  | LOC_Os03g32570.1 |
| DG <sub>HP</sub> | Os034475_01 | S5 | 1.548  | 0.000  | P | 1008.392  | P | 2948.839 | P | 3967.039  | LOC_Os08g35310.1 |
| DG <sub>HP</sub> | Os034833_01 | S5 | 0.000  | 1.929  | P | 366.334   | P | 567.259  | P | 149.009   | LOC_Os10g35070.4 |
| DG <sub>HP</sub> | Os034849_01 | S5 | 1.222  | 0.000  | P | 621.741   | P | 1450.441 | P | 2294.948  | LOC_Os09g25010.1 |
| DG <sub>HP</sub> | Os034986_01 | S5 | 1.313  | 0.000  | P | 874.792   | P | 2172.830 | P | 3389.930  | -                |
| DG <sub>HP</sub> | Os035023_01 | S5 | 0.000  | 1.376  | P | 2002.856  | P | 1351.694 | P | 520.873   | -                |
| DG <sub>HP</sub> | Os035558_01 | S5 | -1.262 | 0.000  | P | 17524.279 | P | 7307.398 | P | 15062.712 | LOC_Os06g47360.1 |
| DG <sub>HP</sub> | Os035594_01 | S5 | 1.982  | 10.000 | P | 267.852   | P | 1057.901 | A | 967.402   | LOC_Os12g15680.1 |
| DG <sub>HP</sub> | Os035852_01 | S5 | 1.209  | 0.000  | P | 419.920   | P | 970.712  | P | 618.946   | LOC_Os04g41570.3 |
| DG <sub>HP</sub> | Os036001_01 | S5 | 1.355  | 0.000  | P | 433.824   | P | 1109.438 | P | 1668.062  | LOC_Os11g19070.1 |
| DG <sub>HP</sub> | Os036231_01 | S5 | -1.090 | 0.000  | P | 1934.736  | P | 908.697  | P | 1032.708  | LOC_Os03g46200.1 |
| DG <sub>HP</sub> | Os036440_01 | S5 | 1.918  | 10.000 | P | 212.892   | P | 804.242  | A | 862.311   | LOC_Os01g35254.1 |
| DG <sub>HP</sub> | Os036576_01 | S5 | -1.154 | -1.357 | P | 367.552   | P | 165.151  | P | 423.159   | LOC_Os03g31690.1 |
| DG <sub>HP</sub> | Os036737_01 | S5 | 1.556  | 0.000  | P | 291.454   | P | 856.699  | P | 1397.957  | LOC_Os01g18370.1 |
| DG <sub>HP</sub> | Os037264_01 | S5 | 0.000  | 1.426  | P | 1205.909  | P | 1056.401 | P | 393.107   | LOC_Os01g11620.1 |
| DG <sub>HP</sub> | Os037907_01 | S5 | 1.346  | 10.000 | P | 137.888   | P | 350.483  | A | 353.593   | LOC_Os03g12160.1 |
| DG <sub>HP</sub> | Os038478_01 | S5 | 0.000  | -1.520 | P | 342.867   | P | 256.355  | P | 735.229   | LOC_Os01g44390.1 |
| DG <sub>HP</sub> | Os038480_01 | S5 | 0.000  | -1.594 | P | 645.195   | P | 333.207  | P | 1005.764  | LOC_Os01g44370.1 |
| DG <sub>HP</sub> | Os038506_01 | S5 | 0.000  | -1.530 | P | 1558.261  | P | 942.422  | P | 2721.700  | LOC_Os02g09150.2 |
| DG <sub>HP</sub> | Os039150_01 | S5 | -1.366 | 10.000 | P | 576.198   | P | 223.531  | A | 48.853    | LOC_Os02g18070.1 |
| DG <sub>HP</sub> | Os039379_01 | S5 | 1.255  | 0.000  | P | 1131.971  | P | 2701.499 | P | 2259.514  | LOC_Os04g51510.1 |
| DG <sub>HP</sub> | Os039580_01 | S5 | -1.573 | 1.415  | P | 963.911   | P | 324.032  | P | 121.479   | LOC_Os02g40180.1 |
| DG <sub>HP</sub> | Os039715_01 | S5 | 0.000  | -1.409 | P | 329.364   | P | 212.525  | P | 564.324   | LOC_Os01g21990.1 |
| DG <sub>HP</sub> | Os040011_01 | S5 | 0.000  | 1.272  | P | 444.771   | P | 533.392  | P | 220.804   | LOC_Os04g07930.1 |
| DG <sub>HP</sub> | Os040248_01 | S5 | -1.528 | -1.433 | P | 1607.206  | P | 557.478  | P | 1504.996  | LOC_Os03g37960.1 |
| DG <sub>HP</sub> | Os040491_01 | S5 | 0.000  | 1.587  | P | 3555.309  | P | 2891.130 | P | 962.152   | LOC_Os01g52910.1 |
| DG <sub>HP</sub> | Os041201_01 | S5 | -1.469 | 0.000  | P | 1701.576  | P | 614.802  | P | 306.409   | LOC_Os03g53030.1 |

|                  |             |    |        |        |   |           |   |           |   |           |                  |
|------------------|-------------|----|--------|--------|---|-----------|---|-----------|---|-----------|------------------|
| DG <sub>HP</sub> | Os041241_01 | S5 | -1.184 | 2.027  | P | 2841.481  | P | 1250.385  | P | 306.785   | LOC_Os01g21270.1 |
| DG <sub>HP</sub> | Os041337_01 | S5 | 0.000  | 1.314  | P | 779.691   | P | 421.652   | P | 169.551   | LOC_Os04g05490.1 |
| DG <sub>HP</sub> | Os041663_01 | S5 | -1.106 | 1.495  | P | 3752.584  | P | 1742.818  | P | 618.270   | LOC_Os01g70080.1 |
| DG <sub>HP</sub> | Os041929_01 | S5 | 1.474  | 0.000  | P | 266.127   | P | 739.039   | P | 627.911   | LOC_Os06g28320.1 |
| DG <sub>HP</sub> | Os042013_01 | S5 | 1.208  | 0.000  | P | 5460.482  | P | 12614.492 | P | 19425.622 | LOC_Os08g19330.1 |
| DG <sub>HP</sub> | Os042038_01 | S5 | 0.000  | -2.063 | P | 318.063   | P | 202.829   | P | 847.311   | LOC_Os06g15990.1 |
| DG <sub>HP</sub> | Os042267_01 | S5 | -1.177 | 0.000  | P | 595.273   | P | 263.289   | P | 526.998   | LOC_Os10g24970.1 |
| DG <sub>HP</sub> | Os042617_01 | S5 | 0.000  | 1.311  | P | 270.209   | P | 363.827   | P | 146.644   | LOC_Os02g36490.2 |
| DG <sub>HP</sub> | Os042725_01 | S5 | -1.072 | 10.000 | P | 392.538   | P | 186.737   | A | 33.071    | LOC_Os07g35740.1 |
| DG <sub>HP</sub> | Os042866_01 | S5 | 0.000  | 1.347  | P | 668.045   | P | 467.413   | P | 183.731   | LOC_Os10g05820.1 |
| DG <sub>HP</sub> | Os042879_01 | S5 | -1.080 | 1.316  | P | 1027.260  | P | 486.063   | P | 195.269   | -                |
| DG <sub>HP</sub> | Os043506_01 | S5 | 0.000  | 1.249  | P | 1348.549  | P | 2761.156  | P | 1162.080  | LOC_Os07g35880.1 |
| DG <sub>HP</sub> | Os043740_01 | S5 | -1.470 | 0.000  | P | 7662.097  | P | 2766.201  | P | 4514.255  | LOC_Os04g11956.1 |
| DG <sub>HP</sub> | Os044144_01 | S5 | 0.000  | 1.510  | P | 962.063   | P | 603.238   | P | 211.802   | LOC_Os07g12700.1 |
| DG <sub>HP</sub> | Os044170_01 | S5 | -1.260 | 0.000  | P | 1357.091  | P | 566.625   | P | 263.324   | LOC_Os01g40200.1 |
| DG <sub>HP</sub> | Os044283_01 | S5 | 10.000 | -1.359 | A | 100.997   | P | 589.482   | P | 1511.648  | -                |
| DG <sub>HP</sub> | Os044300_01 | S5 | 0.000  | 1.858  | P | 17689.327 | P | 13064.532 | P | 3603.851  | LOC_Os05g11320.1 |
| DG <sub>HP</sub> | Os044585_01 | S5 | -1.170 | 10.000 | P | 736.974   | P | 327.513   | A | 87.597    | LOC_Os05g14360.1 |
| DG <sub>HP</sub> | Os044617_01 | S5 | 1.964  | 0.000  | P | 865.918   | P | 3378.836  | P | 6184.661  | -                |
| DG <sub>HP</sub> | Os044660_01 | S5 | 0.000  | 1.234  | P | 330.768   | P | 350.398   | P | 148.968   | LOC_Os11g43200.1 |
| DG <sub>HP</sub> | Os044685_01 | S5 | 0.000  | 1.813  | P | 1152.282  | P | 660.960   | P | 188.145   | LOC_Os11g20600.1 |
| DG <sub>HP</sub> | Os044913_01 | S5 | 0.000  | 1.402  | P | 594.980   | P | 1092.528  | P | 413.552   | LOC_Os02g27300.1 |
| DG <sub>HP</sub> | Os045034_01 | S5 | -1.176 | 1.327  | P | 999.808   | P | 442.462   | P | 176.343   | LOC_Os10g28160.1 |
| DG <sub>HP</sub> | Os045117_01 | S5 | -1.310 | 0.000  | P | 3221.344  | P | 1299.365  | P | 563.177   | LOC_Os06g06310.1 |
| DG <sub>HP</sub> | Os045140_01 | S5 | -1.105 | 0.000  | P | 428.528   | P | 199.245   | P | 157.457   | LOC_Os08g27460.1 |
| DG <sub>HP</sub> | Os045347_01 | S5 | 10.000 | -1.099 | A | 134.102   | P | 692.322   | P | 1483.118  | LOC_Os06g18120.1 |
| DG <sub>HP</sub> | Os045364_01 | S5 | -1.083 | 0.000  | P | 616.086   | P | 290.746   | P | 216.421   | LOC_Os09g01860.1 |
| DG <sub>HP</sub> | Os045434_01 | S5 | 1.493  | 0.000  | P | 186.307   | P | 524.469   | P | 652.264   | LOC_Os05g23210.1 |
| DG <sub>HP</sub> | Os045565_01 | S5 | 2.416  | -1.333 | P | 141.545   | P | 755.608   | P | 1903.885  | LOC_Os10g09630.1 |
| DG <sub>HP</sub> | Os045783_01 | S5 | 1.453  | 10.000 | P | 164.540   | P | 450.543   | A | 492.560   | -                |
| DG <sub>HP</sub> | Os046160_01 | S5 | -1.236 | 0.000  | P | 1117.104  | P | 474.417   | P | 293.964   | LOC_Os07g32440.1 |

|                  |             |    |        |        |   |          |   |          |   |           |                  |
|------------------|-------------|----|--------|--------|---|----------|---|----------|---|-----------|------------------|
| DG <sub>HP</sub> | Os046207_01 | S5 | -1.177 | 2.442  | P | 2122.686 | P | 938.604  | P | 172.784   | LOC_Os02g12540.1 |
| DG <sub>HP</sub> | Os046309_01 | S5 | 0.000  | 1.452  | P | 450.542  | P | 454.027  | P | 165.900   | LOC_Os08g06070.1 |
| DG <sub>HP</sub> | Os046433_01 | S5 | 0.000  | -1.079 | P | 690.538  | P | 507.417  | P | 1071.585  | LOC_Os12g17910.1 |
| DG <sub>HP</sub> | Os046633_01 | S5 | 0.000  | 1.847  | P | 1701.015 | P | 1342.336 | P | 373.220   | -                |
| DG <sub>HP</sub> | Os046795_01 | S5 | 0.000  | 1.424  | P | 217.968  | P | 344.389  | P | 128.356   | LOC_Os04g43400.1 |
| DG <sub>HP</sub> | Os046888_01 | S5 | 1.556  | 1.349  | P | 493.435  | P | 1450.627 | P | 569.650   | LOC_Os03g25460.1 |
| DG <sub>HP</sub> | Os047672_01 | S5 | 0.000  | 1.250  | P | 685.844  | P | 550.530  | P | 231.459   | LOC_Os05g09720.1 |
| DG <sub>HP</sub> | Os047994_01 | S5 | 1.317  | 0.000  | P | 190.805  | P | 475.480  | P | 617.998   | LOC_Os06g44690.1 |
| DG <sub>HP</sub> | Os048525_01 | S5 | -1.919 | 0.000  | P | 5048.548 | P | 1335.431 | P | 2205.190  | LOC_Os07g14750.1 |
| DG <sub>HP</sub> | Os048651_01 | S5 | 0.000  | 1.881  | P | 788.649  | P | 449.015  | P | 121.910   | LOC_Os10g28724.1 |
| DG <sub>HP</sub> | Os048713_01 | S5 | -1.222 | -1.304 | P | 609.566  | P | 261.262  | P | 645.008   | LOC_Os11g27090.1 |
| DG <sub>HP</sub> | Os048731_01 | S5 | 0.000  | -1.371 | P | 423.332  | P | 208.240  | P | 538.739   | -                |
| DG <sub>HP</sub> | Os048874_01 | S5 | 1.837  | 0.000  | P | 337.987  | P | 1207.370 | P | 1067.787  | LOC_Os05g51930.1 |
| DG <sub>HP</sub> | Os049215_01 | S5 | 0.000  | 1.508  | P | 1636.884 | P | 1107.547 | P | 389.474   | LOC_Os08g31550.1 |
| DG <sub>HP</sub> | Os049435_01 | S5 | 0.000  | 2.226  | P | 1408.459 | P | 893.190  | P | 190.897   | -                |
| DG <sub>HP</sub> | Os050200_01 | S5 | 0.000  | 1.382  | P | 1207.389 | P | 1016.671 | P | 390.170   | LOC_Os07g34640.2 |
| DG <sub>HP</sub> | Os050398_01 | S5 | 1.293  | 0.000  | P | 194.175  | P | 475.835  | P | 607.832   | LOC_Os11g12060.1 |
| DG <sub>HP</sub> | Os050784_01 | S5 | -1.076 | 0.000  | P | 567.251  | P | 269.119  | P | 339.936   | LOC_Os11g27640.1 |
| DG <sub>HP</sub> | Os050787_01 | S5 | -1.425 | 0.000  | P | 1363.258 | P | 507.861  | P | 650.464   | LOC_Os03g28980.1 |
| DG <sub>HP</sub> | Os050873_01 | S5 | -1.080 | 0.000  | P | 3089.722 | P | 1461.887 | P | 810.754   | -                |
| DG <sub>HP</sub> | Os051250_01 | S5 | 0.000  | 1.584  | P | 3436.056 | P | 2894.178 | P | 965.262   | -                |
| DG <sub>HP</sub> | Os051647_01 | S5 | 1.453  | 0.000  | P | 160.548  | P | 439.405  | P | 406.832   | -                |
| DG <sub>HP</sub> | Os051737_01 | S5 | -1.159 | 0.000  | P | 2126.526 | P | 952.182  | P | 512.064   | LOC_Os06g26050.1 |
| DG <sub>HP</sub> | Os051932_01 | S5 | 1.587  | 0.000  | P | 1736.786 | P | 5218.792 | P | 3138.886  | LOC_Os06g04030.1 |
| DG <sub>HP</sub> | Os051935_01 | S5 | 2.163  | 0.000  | P | 615.053  | P | 2754.164 | P | 2118.627  | LOC_Os01g15270.1 |
| DG <sub>HP</sub> | Os051940_01 | S5 | 0.000  | -1.382 | P | 1268.171 | P | 1239.701 | P | 3230.521  | LOC_Os10g39410.1 |
| DG <sub>HP</sub> | Os051948_01 | S5 | 0.000  | -2.070 | P | 898.065  | P | 1606.427 | P | 6743.778  | LOC_Os11g06720.1 |
| DG <sub>HP</sub> | Os051956_01 | S5 | 0.000  | -1.346 | P | 7161.984 | P | 5335.476 | P | 13558.571 | LOC_Os07g37240.1 |
| DG <sub>HP</sub> | Os051957_01 | S5 | 0.000  | -1.603 | P | 638.335  | P | 422.507  | P | 1283.642  | LOC_Os11g26850.2 |
| DG <sub>HP</sub> | Os051973_01 | S5 | 0.000  | -1.219 | P | 5805.996 | P | 5607.101 | P | 13048.773 | LOC_Os01g45274.1 |
| DG <sub>HP</sub> | Os051980_01 | S5 | 0.000  | -1.462 | P | 727.866  | P | 624.850  | P | 1721.491  | LOC_Os02g27030.1 |

|                  |             |    |        |        |   |          |   |          |   |          |                  |
|------------------|-------------|----|--------|--------|---|----------|---|----------|---|----------|------------------|
| DG <sub>HP</sub> | Os051997_01 | S5 | 2.168  | 0.000  | P | 135.121  | P | 607.204  | P | 347.749  | LOC_Os04g54280.1 |
| DG <sub>HP</sub> | Os052028_01 | S5 | 0.000  | -1.119 | P | 2685.366 | P | 4570.123 | P | 9928.958 | LOC_Os12g23200.1 |
| DG <sub>HP</sub> | Os052035_01 | S5 | 1.233  | 0.000  | P | 282.231  | P | 663.424  | P | 476.120  | LOC_Os01g37800.1 |
| DG <sub>HP</sub> | Os052059_01 | S5 | 1.261  | -1.257 | P | 392.187  | P | 940.122  | P | 2246.849 | LOC_Os09g26420.3 |
| DG <sub>HP</sub> | Os052080_01 | S5 | 1.217  | 0.000  | P | 144.762  | P | 336.566  | P | 371.278  | LOC_Os08g44480.2 |
| DG <sub>HP</sub> | Os052093_01 | S5 | 0.000  | -1.370 | P | 836.660  | P | 1657.315 | P | 4282.394 | LOC_Os02g38210.1 |
| DG <sub>HP</sub> | Os052094_01 | S5 | 1.192  | 0.000  | P | 168.127  | P | 384.100  | P | 283.458  | LOC_Os05g44050.1 |
| DG <sub>HP</sub> | Os052111_01 | S5 | 1.476  | 0.000  | P | 280.929  | P | 781.440  | P | 568.723  | LOC_Os09g31482.3 |
| DG <sub>HP</sub> | Os052118_01 | S5 | 0.000  | -2.360 | P | 868.005  | P | 855.511  | P | 4392.072 | LOC_Os10g18340.1 |
| DG <sub>HP</sub> | Os052122_01 | S5 | 1.498  | 0.000  | P | 376.713  | P | 1063.958 | P | 1297.290 | LOC_Os02g04160.1 |
| DG <sub>HP</sub> | Os052140_01 | S5 | 1.581  | 0.000  | P | 746.703  | P | 2233.431 | P | 2023.913 | LOC_Os08g43560.1 |
| DG <sub>HP</sub> | Os052148_01 | S5 | 1.526  | 0.000  | P | 428.680  | P | 1234.554 | P | 935.047  | -                |
| DG <sub>HP</sub> | Os052184_01 | S5 | 0.000  | -1.136 | P | 827.691  | P | 1125.421 | P | 2474.039 | LOC_Os06g08080.1 |
| DG <sub>HP</sub> | Os052201_01 | S5 | -1.184 | 1.711  | P | 1619.826 | P | 712.961  | P | 217.806  | LOC_Os07g46500.2 |
| DG <sub>HP</sub> | Os052214_01 | S5 | 0.000  | 2.415  | P | 324.739  | P | 735.001  | P | 137.816  | -                |
| DG <sub>HP</sub> | Os052236_01 | S5 | 1.299  | 0.000  | P | 357.439  | P | 879.626  | P | 920.030  | LOC_Os01g50760.1 |
| DG <sub>HP</sub> | Os052259_01 | S5 | 1.550  | 0.000  | P | 191.083  | P | 559.510  | P | 487.629  | LOC_Os08g19650.1 |
| DG <sub>HP</sub> | Os052331_01 | S5 | 1.269  | 0.000  | P | 224.549  | P | 541.290  | P | 609.304  | LOC_Os04g32710.1 |
| DG <sub>HP</sub> | Os052360_01 | S5 | 1.307  | 0.000  | P | 164.327  | P | 406.673  | P | 444.285  | LOC_Os03g50070.1 |
| DG <sub>HP</sub> | Os052464_01 | S5 | 1.239  | 0.000  | P | 137.737  | P | 325.080  | P | 196.016  | LOC_Os02g50210.1 |
| DG <sub>HP</sub> | Os052465_01 | S5 | 1.521  | 0.000  | P | 193.030  | P | 553.829  | P | 573.226  | -                |
| DG <sub>HP</sub> | Os052515_01 | S5 | 1.308  | 0.000  | P | 193.010  | P | 477.773  | P | 262.199  | -                |
| DG <sub>HP</sub> | Os052535_01 | S5 | 1.718  | 0.000  | P | 1137.289 | P | 3741.575 | P | 2566.886 | LOC_Os03g54160.2 |
| DG <sub>HP</sub> | Os052559_01 | S5 | 1.395  | 0.000  | P | 302.129  | P | 794.724  | P | 855.196  | LOC_Os01g48690.1 |
| DG <sub>HP</sub> | Os052580_01 | S5 | 1.397  | 0.000  | P | 261.905  | P | 689.662  | P | 323.055  | LOC_Os01g69030.3 |
| DG <sub>HP</sub> | Os052644_01 | S5 | 0.000  | 1.667  | P | 969.770  | P | 815.533  | P | 256.904  | LOC_Os01g37590.1 |
| DG <sub>HP</sub> | Os052672_01 | S5 | 0.000  | 1.256  | P | 294.376  | P | 545.377  | P | 228.374  | LOC_Os01g62810.2 |
| DG <sub>HP</sub> | Os052727_01 | S5 | 2.212  | 0.000  | P | 623.292  | P | 2888.121 | P | 1328.652 | LOC_Os01g64660.2 |
| DG <sub>HP</sub> | Os052870_01 | S5 | 1.391  | 0.000  | P | 236.481  | P | 620.263  | P | 699.111  | LOC_Os01g21820.1 |
| DG <sub>HP</sub> | Os053101_01 | S5 | 0.000  | 1.816  | P | 843.537  | P | 526.149  | P | 149.442  | LOC_Os03g62210.1 |
| DG <sub>HP</sub> | Os053247_01 | S5 | 0.000  | -1.408 | P | 152.359  | P | 215.928  | P | 572.990  | LOC_Os10g40830.1 |

|                  |             |    |        |        |   |          |   |          |   |           |                  |
|------------------|-------------|----|--------|--------|---|----------|---|----------|---|-----------|------------------|
| DG <sub>HP</sub> | Os053523_01 | S5 | 1.899  | 0.000  | P | 141.792  | P | 528.887  | P | 320.684   | LOC_Os02g45520.2 |
| DG <sub>HP</sub> | Os053553_01 | S5 | 1.438  | 0.000  | P | 133.962  | P | 362.955  | P | 216.427   | LOC_Os01g54880.1 |
| DG <sub>HP</sub> | Os053602_01 | S5 | 0.000  | 1.272  | P | 284.713  | P | 442.704  | P | 183.324   | -                |
| DG <sub>HP</sub> | Os053716_01 | S5 | 0.000  | 1.287  | P | 1804.475 | P | 1651.040 | P | 676.377   | LOC_Os01g42294.1 |
| DG <sub>HP</sub> | Os053987_01 | S5 | 0.000  | -1.706 | P | 270.981  | P | 280.435  | P | 914.872   | LOC_Os01g65190.1 |
| DG <sub>HP</sub> | Os054035_01 | S5 | 2.204  | 10.000 | P | 197.735  | P | 911.267  | A | 145.590   | -                |
| DG <sub>HP</sub> | Os054121_01 | S5 | 1.493  | 0.000  | P | 210.903  | P | 593.447  | P | 696.864   | LOC_Os09g10700.1 |
| DG <sub>HP</sub> | Os054397_01 | S5 | 1.504  | 0.000  | P | 131.998  | P | 374.505  | P | 204.872   | LOC_Os10g28200.1 |
| DG <sub>HP</sub> | Os054429_01 | S5 | -1.325 | 0.000  | P | 381.226  | P | 152.154  | P | 183.286   | LOC_Os12g38051.1 |
| DG <sub>HP</sub> | Os054446_01 | S5 | 1.552  | 0.000  | P | 1741.734 | P | 5107.354 | P | 5717.622  | LOC_Os07g01760.1 |
| DG <sub>HP</sub> | Os054448_01 | S5 | 0.000  | -1.256 | P | 237.919  | P | 330.926  | P | 790.266   | LOC_Os06g48750.2 |
| DG <sub>HP</sub> | Os054450_01 | S5 | 0.000  | -1.170 | P | 492.335  | P | 811.431  | P | 1825.452  | LOC_Os04g57220.3 |
| DG <sub>HP</sub> | Os054452_01 | S5 | 0.000  | -1.260 | P | 4527.803 | P | 4287.447 | P | 10266.665 | LOC_Os07g04840.1 |
| DG <sub>HP</sub> | Os054458_01 | S5 | 0.000  | -1.283 | P | 601.530  | P | 754.533  | P | 1836.295  | LOC_Os12g05050.1 |
| DG <sub>HP</sub> | Os054471_01 | S5 | 0.000  | 1.234  | P | 573.241  | P | 482.948  | P | 205.380   | LOC_Os10g40530.1 |
| DG <sub>HP</sub> | Os054482_01 | S5 | -1.139 | -1.743 | P | 987.621  | P | 448.371  | P | 1500.721  | LOC_Os05g49890.1 |
| DG <sub>HP</sub> | Os054485_01 | S5 | 1.451  | 0.000  | P | 295.881  | P | 809.114  | P | 834.769   | LOC_Os10g39130.1 |
| DG <sub>HP</sub> | Os054487_01 | S5 | 0.000  | -1.472 | P | 911.794  | P | 687.050  | P | 1905.912  | LOC_Os06g04020.1 |
| DG <sub>HP</sub> | Os054491_01 | S5 | 0.000  | -1.126 | P | 573.033  | P | 525.217  | P | 1146.032  | -                |
| DG <sub>HP</sub> | Os054509_01 | S5 | 1.261  | 0.000  | P | 2928.737 | P | 7021.245 | P | 8701.674  | LOC_Os02g47020.1 |
| DG <sub>HP</sub> | Os054516_01 | S5 | 1.312  | 0.000  | P | 235.868  | P | 585.546  | P | 752.511   | LOC_Os11g14920.1 |
| DG <sub>HP</sub> | Os054550_01 | S5 | 0.000  | -1.120 | P | 418.917  | P | 266.289  | P | 578.861   | LOC_Os06g04070.1 |
| DG <sub>HP</sub> | Os054562_01 | S5 | 1.348  | 2.191  | P | 1488.457 | P | 3787.826 | P | 829.543   | LOC_Os01g21250.1 |
| DG <sub>HP</sub> | Os054578_01 | S5 | 1.323  | 0.000  | P | 315.996  | P | 790.568  | P | 1271.839  | LOC_Os02g39630.2 |
| DG <sub>HP</sub> | Os054590_01 | S5 | 10.000 | 3.650  | A | 191.650  | P | 2204.687 | P | 175.625   | LOC_Os03g09250.2 |
| DG <sub>HP</sub> | Os054627_01 | S5 | 0.000  | -1.530 | P | 472.621  | P | 294.987  | P | 852.053   | LOC_Os01g73940.1 |
| DG <sub>HP</sub> | Os054634_01 | S5 | 1.496  | 0.000  | P | 742.355  | P | 2093.976 | P | 937.424   | LOC_Os10g32810.1 |
| DG <sub>HP</sub> | Os054641_01 | S5 | 1.518  | 0.000  | P | 739.282  | P | 2117.015 | P | 1267.601  | LOC_Os01g60410.3 |
| DG <sub>HP</sub> | Os054673_01 | S5 | 1.281  | 0.000  | P | 393.037  | P | 955.159  | P | 552.805   | LOC_Os03g55540.1 |
| DG <sub>HP</sub> | Os054727_01 | S5 | 1.356  | 0.000  | P | 255.292  | P | 653.636  | P | 603.723   | LOC_Os01g61670.1 |
| DG <sub>HP</sub> | Os054734_02 | S5 | 1.617  | 10.000 | P | 223.470  | P | 685.517  | A | 782.423   | LOC_Os06g03486.1 |



|                  |             |    |        |        |   |          |   |          |   |          |                  |
|------------------|-------------|----|--------|--------|---|----------|---|----------|---|----------|------------------|
| DG <sub>HP</sub> | Os054741_01 | S5 | 10.000 | -3.906 | A | 67.440   | P | 225.190  | P | 3375.287 | -                |
| DG <sub>HP</sub> | Os054743_01 | S5 | 1.658  | 0.000  | P | 159.736  | P | 503.969  | P | 513.253  | LOC_Os01g64970.1 |
| DG <sub>HP</sub> | Os054779_01 | S5 | 0.000  | -1.208 | P | 382.996  | P | 697.908  | P | 1612.455 | LOC_Os01g13770.1 |
| DG <sub>HP</sub> | Os054785_01 | S5 | 1.643  | 0.000  | P | 99.077   | P | 309.496  | P | 219.255  | LOC_Os01g09220.1 |
| DG <sub>HP</sub> | Os054826_01 | S5 | 1.843  | 0.000  | P | 227.116  | P | 814.830  | P | 739.046  | LOC_Os01g70210.1 |
| DG <sub>HP</sub> | Os054838_01 | S5 | 0.000  | -1.174 | P | 182.013  | P | 186.489  | P | 420.748  | LOC_Os03g13800.1 |
| DG <sub>HP</sub> | Os054937_01 | S5 | 0.000  | -1.133 | P | 145.339  | P | 154.958  | P | 339.861  | LOC_Os02g11740.1 |
| DG <sub>HP</sub> | Os054941_01 | S5 | 1.430  | 0.000  | P | 302.486  | P | 815.256  | P | 683.005  | LOC_Os09g07920.1 |
| DG <sub>HP</sub> | Os054984_01 | S5 | 1.254  | 0.000  | P | 282.168  | P | 673.010  | P | 945.191  | LOC_Os05g51450.1 |
| DG <sub>HP</sub> | Os055014_01 | S5 | 1.310  | 0.000  | P | 190.259  | P | 471.696  | P | 454.912  | LOC_Os06g01700.1 |
| DG <sub>HP</sub> | Os055042_01 | S5 | 1.512  | 10.000 | P | 148.327  | P | 422.913  | A | 210.443  | LOC_Os09g06464.1 |
| DG <sub>HP</sub> | Os055136_01 | S5 | 1.553  | 0.000  | P | 165.629  | P | 485.884  | P | 355.109  | LOC_Os07g46520.1 |
| DG <sub>HP</sub> | Os055148_01 | S5 | 1.445  | 0.000  | P | 442.986  | P | 1206.038 | P | 745.871  | LOC_Os03g55030.1 |
| DG <sub>HP</sub> | Os055214_01 | S5 | 1.184  | 0.000  | P | 122.719  | P | 278.862  | P | 255.586  | LOC_Os01g40340.1 |
| DG <sub>HP</sub> | Os055222_01 | S5 | 1.309  | 0.000  | P | 147.839  | P | 366.199  | P | 622.588  | LOC_Os01g59060.1 |
| DG <sub>HP</sub> | Os055308_01 | S5 | 0.000  | 1.312  | P | 492.113  | P | 382.762  | P | 154.174  | LOC_Os07g48020.1 |
| DG <sub>HP</sub> | Os055352_01 | S5 | 0.000  | 1.264  | P | 1791.365 | P | 1212.926 | P | 505.096  | -                |
| DG <sub>HP</sub> | Os055398_01 | S5 | 0.000  | -1.069 | P | 118.075  | P | 127.379  | P | 267.228  | -                |
| DG <sub>HP</sub> | Os055470_01 | S5 | 1.937  | 2.056  | P | 234.278  | P | 897.371  | P | 215.753  | LOC_Os04g45810.1 |
| DG <sub>HP</sub> | Os055517_01 | S5 | 1.449  | 0.000  | P | 137.840  | P | 376.415  | P | 387.187  | LOC_Os02g10860.1 |
| DG <sub>HP</sub> | Os055529_01 | S5 | 1.370  | 0.000  | P | 590.578  | P | 1526.158 | P | 1719.317 | LOC_Os04g56230.1 |
| DG <sub>HP</sub> | Os055679_01 | S5 | 10.000 | -1.864 | A | 98.417   | P | 207.094  | P | 754.109  | LOC_Os01g12270.1 |
| DG <sub>HP</sub> | Os055703_01 | S5 | 0.000  | -1.285 | P | 343.760  | P | 418.695  | P | 1020.445 | LOC_Os01g31680.1 |
| DG <sub>HP</sub> | Os055766_02 | S5 | 1.431  | 0.000  | P | 214.040  | P | 577.043  | P | 291.185  | -                |
| DG <sub>HP</sub> | Os056149_01 | S5 | -1.276 | -1.115 | P | 6215.269 | P | 2566.908 | P | 5559.825 | LOC_Os01g22249.1 |
| DG <sub>HP</sub> | Os056222_01 | S5 | 0.000  | 1.261  | P | 1332.570 | P | 1366.157 | P | 569.906  | LOC_Os06g01580.1 |
| DG <sub>HP</sub> | Os056250_01 | S5 | 0.000  | 1.639  | P | 496.888  | P | 935.017  | P | 300.117  | LOC_Os04g33490.1 |
| DG <sub>HP</sub> | Os056390_01 | S5 | 0.000  | 1.435  | P | 904.456  | P | 887.282  | P | 328.110  | LOC_Os01g68330.1 |
| DG <sub>HP</sub> | Os056446_01 | S5 | 0.000  | -1.841 | P | 155.003  | P | 292.045  | P | 1046.030 | LOC_Os01g74160.1 |
| DG <sub>HP</sub> | Os056782_01 | S5 | -1.275 | 0.000  | P | 531.848  | P | 219.739  | P | 278.097  | LOC_Os04g09530.1 |
| DG <sub>HP</sub> | Os056903_02 | S5 | -1.112 | -2.124 | P | 344.219  | P | 159.298  | P | 694.326  | LOC_Os01g59510.1 |

|                  |               |          |                  |        |                  |          |              |           |         |           |                  |         |
|------------------|---------------|----------|------------------|--------|------------------|----------|--------------|-----------|---------|-----------|------------------|---------|
| DG <sub>HP</sub> | Os056918_02   | S5       | 0.000            | 2.472  | P                | 4233.063 | P            | 3715.749  | P       | 669.686   | LOC_Os01g13690.1 |         |
| DG <sub>HP</sub> | Os056920_02   | S5       | 0.000            | -1.247 | P                | 1511.554 | P            | 836.804   | P       | 1985.607  | -                |         |
| DG <sub>HP</sub> | Os056928_02   | S5       | -1.116           | -1.782 | P                | 3785.857 | P            | 1747.079  | P       | 6009.075  | LOC_Os09g27030.3 |         |
| DG <sub>HP</sub> | Os056934_02   | S5       | 0.000            | -1.217 | P                | 440.134  | P            | 600.759   | P       | 1396.917  | -                |         |
| DG <sub>HP</sub> | Os056946_01   | S5       | 0.000            | 1.531  | P                | 1006.473 | P            | 1037.356  | P       | 358.968   | LOC_Os05g34770.1 |         |
| DG <sub>HP</sub> | Os057021_02   | S5       | 0.000            | 1.245  | P                | 379.539  | P            | 439.716   | P       | 185.459   | LOC_Os02g11050.1 |         |
| DG <sub>HP</sub> | Os057238_02   | S5       | 0.000            | -1.571 | P                | 261.907  | P            | 261.680   | P       | 777.270   | LOC_Os01g65350.1 |         |
| DG <sub>HP</sub> | Os057253_02   | S5       | 0.000            | -1.070 | P                | 187.214  | P            | 213.224   | P       | 447.740   | LOC_Os05g39760.1 |         |
| DG <sub>HP</sub> | Os057254_02   | S5       | 0.000            | -1.250 | P                | 9476.819 | P            | 16128.246 | P       | 38362.689 | -                |         |
| DG <sub>HP</sub> | Os057274_02   | S5       | 1.437            | 0.000  | P                | 1196.709 | P            | 3239.749  | P       | 2736.959  | LOC_Os05g38640.1 |         |
| DG <sub>HP</sub> | Os057275_02   | S5       | 1.388            | 0.000  | P                | 428.356  | P            | 1121.100  | P       | 1925.411  | -                |         |
| DG <sub>HP</sub> | Os057286_02   | S5       | 1.811            | 0.000  | P                | 965.292  | P            | 3386.905  | P       | 2812.779  | LOC_Os01g43150.1 |         |
| DG <sub>HP</sub> | Os057301_02   | S5       | 1.446            | 0.000  | P                | 463.327  | P            | 1262.751  | P       | 1018.292  | LOC_Os03g04710.1 |         |
| DG <sub>HP</sub> | Os057402_02   | S5       | 1.386            | 10.000 | P                | 141.132  | P            | 368.814   | A       | 90.419    | -                |         |
| DG <sub>HP</sub> | Os057481_02   | S5       | 1.455            | 2.406  | P                | 670.569  | P            | 1838.851  | P       | 347.057   | LOC_Os04g43390.1 |         |
| DG <sub>HP</sub> | Os057595_02   | S5       | 0.000            | -1.362 | P                | 891.932  | P            | 752.751   | P       | 1935.402  | LOC_Os05g49610.1 |         |
| DG <sub>HP</sub> | GeneID        | S4       | log2(Ratio(L/9)) |        | log2(Ratio(L/P)) |          | He_9311.flag |           | He_9311 |           | He_LYP9.flag     | He_LYP9 |
|                  | He_PA64s.flag | He_PA64s |                  | -      |                  |          |              |           |         |           |                  |         |
| DG <sub>HP</sub> | Os000198_01   | S4       | -1.438           | 0.000  | P                | 630.267  | P            | 232.644   | P       | 343.503   | LOC_Os05g27820.2 |         |
| DG <sub>HP</sub> | Os000238_01   | S4       | -1.362           | -1.410 | P                | 377.444  | P            | 146.851   | P       | 390.285   | LOC_Os05g36050.1 |         |
| DG <sub>HP</sub> | Os000242_01   | S4       | -1.384           | 0.000  | P                | 429.805  | P            | 164.662   | P       | 282.176   | LOC_Os12g05040.3 |         |
| DG <sub>HP</sub> | Os000249_01   | S4       | 0.000            | -1.351 | P                | 235.277  | P            | 190.925   | P       | 486.941   | LOC_Os03g58810.1 |         |
| DG <sub>HP</sub> | Os000271_01   | S4       | 1.671            | 0.000  | P                | 264.202  | P            | 841.068   | P       | 966.739   | LOC_Os02g22100.7 |         |
| DG <sub>HP</sub> | Os000312_01   | S4       | -2.003           | 0.000  | P                | 841.318  | P            | 209.933   | P       | 326.020   | LOC_Os06g04240.1 |         |
| DG <sub>HP</sub> | Os000322_01   | S4       | 1.586            | 0.000  | P                | 449.951  | P            | 1351.268  | P       | 2065.001  | LOC_Os07g28610.2 |         |
| DG <sub>HP</sub> | Os000342_01   | S4       | 0.000            | -1.233 | P                | 310.664  | P            | 339.072   | P       | 797.168   | LOC_Os10g34180.2 |         |
| DG <sub>HP</sub> | Os000389_01   | S4       | -1.183           | 0.000  | P                | 886.391  | P            | 390.318   | P       | 676.545   | LOC_Os05g27730.1 |         |
| DG <sub>HP</sub> | Os000416_01   | S4       | -2.068           | 0.000  | P                | 5057.019 | P            | 1206.392  | P       | 2052.593  | LOC_Os08g39450.1 |         |
| DG <sub>HP</sub> | Os000440_01   | S4       | -2.796           | 0.000  | P                | 3553.177 | P            | 511.441   | P       | 883.197   | LOC_Os04g52090.1 |         |
| DG <sub>HP</sub> | Os000458_01   | S4       | -1.260           | 0.000  | P                | 777.665  | P            | 324.780   | P       | 589.202   | LOC_Os12g04260.1 |         |
| DG <sub>HP</sub> | Os000590_01   | S4       | -1.289           | 0.000  | P                | 558.200  | P            | 228.404   | P       | 328.798   | LOC_Os05g03590.1 |         |

|                  |             |    |        |        |   |          |   |          |   |          |                  |
|------------------|-------------|----|--------|--------|---|----------|---|----------|---|----------|------------------|
| DG <sub>HP</sub> | Os000665_01 | S4 | 0.000  | -1.424 | P | 182.587  | P | 211.592  | P | 567.620  | LOC_Os02g48640.1 |
| DG <sub>HP</sub> | Os000694_01 | S4 | 0.000  | -1.590 | P | 283.889  | P | 269.969  | P | 812.470  | LOC_Os02g49640.1 |
| DG <sub>HP</sub> | Os000781_01 | S4 | 0.000  | 1.787  | P | 238.119  | P | 473.879  | P | 137.274  | LOC_Os01g16010.1 |
| DG <sub>HP</sub> | Os000784_01 | S4 | -1.124 | 0.000  | P | 808.419  | P | 370.889  | P | 298.983  | LOC_Os07g01320.1 |
| DG <sub>HP</sub> | Os000838_01 | S4 | -1.161 | 0.000  | P | 400.080  | P | 178.882  | P | 246.131  | LOC_Os05g22370.1 |
| DG <sub>HP</sub> | Os000897_01 | S4 | -1.176 | 0.000  | P | 486.815  | P | 215.409  | P | 261.432  | LOC_Os03g55490.1 |
| DG <sub>HP</sub> | Os000918_01 | S4 | 0.000  | -1.846 | P | 192.203  | P | 397.132  | P | 1427.755 | LOC_Os11g44960.1 |
| DG <sub>HP</sub> | Os000954_01 | S4 | -1.206 | 0.000  | P | 843.678  | P | 365.801  | P | 233.669  | LOC_Os02g39350.1 |
| DG <sub>HP</sub> | Os001035_01 | S4 | 0.000  | -1.150 | P | 336.505  | P | 355.719  | P | 789.388  | LOC_Os01g61070.1 |
| DG <sub>HP</sub> | Os001105_01 | S4 | 0.000  | -1.262 | P | 337.617  | P | 227.445  | P | 545.405  | LOC_Os03g53580.1 |
| DG <sub>HP</sub> | Os001272_01 | S4 | -1.645 | 0.000  | P | 954.131  | P | 305.105  | P | 289.304  | -                |
| DG <sub>HP</sub> | Os001428_01 | S4 | 0.000  | -1.374 | P | 195.773  | P | 253.165  | P | 655.997  | LOC_Os11g33320.1 |
| DG <sub>HP</sub> | Os001430_01 | S4 | 0.000  | -1.487 | P | 408.250  | P | 240.307  | P | 673.463  | LOC_Os05g05560.1 |
| DG <sub>HP</sub> | Os001460_01 | S4 | 0.000  | -1.219 | P | 427.606  | P | 264.657  | P | 616.008  | LOC_Os11g33970.1 |
| DG <sub>HP</sub> | Os001715_01 | S4 | 1.541  | 0.000  | P | 1115.202 | P | 3244.107 | P | 1319.637 | LOC_Os07g38240.1 |
| DG <sub>HP</sub> | Os001749_01 | S4 | 1.747  | 1.966  | P | 880.075  | P | 2954.274 | P | 756.115  | LOC_Os01g65530.1 |
| DG <sub>HP</sub> | Os001758_01 | S4 | 0.000  | 1.416  | P | 899.167  | P | 936.072  | P | 350.738  | LOC_Os04g18790.1 |
| DG <sub>HP</sub> | Os001786_01 | S4 | -1.869 | 0.000  | P | 746.116  | P | 204.208  | P | 123.719  | LOC_Os02g09980.1 |
| DG <sub>HP</sub> | Os001903_01 | S4 | 0.000  | 2.444  | P | 1116.143 | P | 1121.143 | P | 205.973  | LOC_Os01g68290.1 |
| DG <sub>HP</sub> | Os001934_01 | S4 | 2.335  | 0.000  | P | 128.519  | P | 648.454  | P | 1200.048 | -                |
| DG <sub>HP</sub> | Os001957_01 | S4 | -1.401 | 0.000  | P | 1658.840 | P | 628.333  | P | 615.711  | LOC_Os07g38230.1 |
| DG <sub>HP</sub> | Os002092_01 | S4 | 0.000  | -1.185 | P | 2498.968 | P | 1458.924 | P | 3316.998 | LOC_Os02g04510.1 |
| DG <sub>HP</sub> | Os002299_01 | S4 | 0.000  | -1.500 | P | 190.393  | P | 281.009  | P | 794.922  | LOC_Os01g50830.1 |
| DG <sub>HP</sub> | Os002353_01 | S4 | 0.000  | 2.459  | P | 1262.639 | P | 1366.877 | P | 248.601  | LOC_Os03g38470.1 |
| DG <sub>HP</sub> | Os002390_01 | S4 | 0.000  | -1.172 | P | 1022.315 | P | 1267.645 | P | 2855.966 | LOC_Os07g05360.1 |
| DG <sub>HP</sub> | Os002451_01 | S4 | -1.292 | 0.000  | P | 774.992  | P | 316.462  | P | 625.995  | LOC_Os01g47730.1 |
| DG <sub>HP</sub> | Os002516_02 | S4 | 0.000  | -1.603 | P | 427.533  | P | 247.656  | P | 752.251  | -                |
| DG <sub>HP</sub> | Os002633_01 | S4 | 0.000  | 1.587  | P | 644.805  | P | 595.106  | P | 198.075  | LOC_Os03g22960.1 |
| DG <sub>HP</sub> | Os002671_01 | S4 | 0.000  | -2.012 | P | 245.289  | P | 217.910  | P | 878.628  | LOC_Os03g51440.1 |
| DG <sub>HP</sub> | Os002753_01 | S4 | -1.075 | 0.000  | P | 613.780  | P | 291.404  | P | 388.013  | LOC_Os12g32610.1 |
| DG <sub>HP</sub> | Os002952_01 | S4 | 1.652  | 0.000  | P | 132.110  | P | 415.265  | P | 649.721  | LOC_Os10g10750.1 |

|                  |             |    |        |        |   |          |   |          |   |          |                  |
|------------------|-------------|----|--------|--------|---|----------|---|----------|---|----------|------------------|
| DG <sub>HP</sub> | Os003566_01 | S4 | 0.000  | 1.727  | P | 595.802  | P | 415.484  | P | 125.541  | -                |
| DG <sub>HP</sub> | Os003568_02 | S4 | -1.806 | 0.000  | P | 1628.723 | P | 465.749  | P | 1018.335 | -                |
| DG <sub>HP</sub> | Os004380_01 | S4 | 0.000  | -1.162 | P | 170.170  | P | 243.778  | P | 545.339  | LOC_Os08g06460.1 |
| DG <sub>HP</sub> | Os004399_01 | S4 | -1.249 | 1.553  | P | 2905.520 | P | 1222.823 | P | 416.601  | LOC_Os02g40180.1 |
| DG <sub>HP</sub> | Os004928_01 | S4 | 0.000  | 1.405  | P | 187.670  | P | 249.723  | P | 94.318   | LOC_Os11g37950.1 |
| DG <sub>HP</sub> | Os005117_01 | S4 | 0.000  | -1.229 | P | 237.096  | P | 243.901  | P | 571.634  | LOC_Os01g13150.1 |
| DG <sub>HP</sub> | Os005218_01 | S4 | 0.000  | -1.156 | P | 247.251  | P | 259.597  | P | 578.473  | -                |
| DG <sub>HP</sub> | Os006128_01 | S4 | -1.259 | 0.000  | P | 1306.176 | P | 545.739  | P | 1019.373 | -                |
| DG <sub>HP</sub> | Os006659_01 | S4 | 0.000  | 1.474  | P | 303.719  | P | 276.560  | P | 99.589   | -                |
| DG <sub>HP</sub> | Os006922_01 | S4 | 0.000  | 1.426  | P | 438.338  | P | 446.868  | P | 166.273  | -                |
| DG <sub>HP</sub> | Os007387_01 | S4 | 0.000  | 1.539  | P | 369.249  | P | 405.468  | P | 139.523  | -                |
| DG <sub>HP</sub> | Os007689_01 | S4 | 1.485  | 10.000 | P | 108.159  | P | 302.768  | A | 290.788  | LOC_Os09g19734.1 |
| DG <sub>HP</sub> | Os007693_01 | S4 | 1.875  | 0.000  | P | 115.194  | P | 422.647  | P | 258.597  | LOC_Os07g03880.1 |
| DG <sub>HP</sub> | Os007729_01 | S4 | 0.000  | 1.457  | P | 251.729  | P | 396.187  | P | 144.300  | LOC_Os09g29380.1 |
| DG <sub>HP</sub> | Os008153_02 | S4 | 1.484  | 0.000  | P | 839.984  | P | 2350.043 | P | 1510.106 | -                |
| DG <sub>HP</sub> | Os008199_01 | S4 | 0.000  | -2.842 | P | 135.625  | P | 268.463  | P | 1925.403 | LOC_Os11g44990.1 |
| DG <sub>HP</sub> | Os008420_01 | S4 | -1.254 | -1.609 | P | 3205.551 | P | 1344.081 | P | 4099.039 | LOC_Os04g37619.1 |
| DG <sub>HP</sub> | Os008441_01 | S4 | -1.170 | 0.000  | P | 1357.710 | P | 603.348  | P | 383.213  | LOC_Os03g49190.1 |
| DG <sub>HP</sub> | Os008450_01 | S4 | 0.000  | 2.260  | P | 4049.994 | P | 2243.962 | P | 468.422  | LOC_Os01g67980.1 |
| DG <sub>HP</sub> | Os008614_01 | S4 | 0.000  | 1.432  | P | 640.154  | P | 442.178  | P | 163.890  | LOC_Os05g49160.2 |
| DG <sub>HP</sub> | Os008632_01 | S4 | 0.000  | 1.558  | P | 254.112  | P | 324.102  | P | 110.088  | LOC_Os03g15940.1 |
| DG <sub>HP</sub> | Os008644_01 | S4 | 0.000  | 1.512  | P | 303.205  | P | 440.349  | P | 154.380  | LOC_Os02g41520.1 |
| DG <sub>HP</sub> | Os008660_01 | S4 | 0.000  | 1.972  | P | 237.490  | P | 344.815  | P | 87.892   | LOC_Os01g73540.1 |
| DG <sub>HP</sub> | Os008667_01 | S4 | 0.000  | 1.468  | P | 249.079  | P | 297.616  | P | 107.617  | LOC_Os04g17680.2 |
| DG <sub>HP</sub> | Os008740_01 | S4 | 0.000  | -1.621 | P | 4155.419 | P | 2858.211 | P | 8793.148 | LOC_Os04g45490.1 |
| DG <sub>HP</sub> | Os008742_01 | S4 | 1.467  | 0.000  | P | 1128.063 | P | 3119.519 | P | 2324.487 | LOC_Os09g35880.1 |
| DG <sub>HP</sub> | Os008751_01 | S4 | 1.638  | 0.000  | P | 125.663  | P | 391.168  | P | 405.868  | -                |
| DG <sub>HP</sub> | Os008761_01 | S4 | -1.906 | 0.000  | P | 1163.906 | P | 310.607  | P | 464.333  | LOC_Os02g32580.1 |
| DG <sub>HP</sub> | Os008866_01 | S4 | 1.460  | 0.000  | P | 614.694  | P | 1691.394 | P | 1093.241 | LOC_Os10g10180.1 |
| DG <sub>HP</sub> | Os008896_01 | S4 | 0.000  | -1.691 | P | 233.492  | P | 242.524  | P | 783.088  | LOC_Os04g51520.1 |
| DG <sub>HP</sub> | Os008938_01 | S4 | 0.000  | 1.539  | P | 369.557  | P | 519.550  | P | 178.776  | LOC_Os12g35320.1 |

|                  |             |    |        |        |   |          |   |           |   |           |                  |
|------------------|-------------|----|--------|--------|---|----------|---|-----------|---|-----------|------------------|
| DG <sub>HP</sub> | Os009085_01 | S4 | 1.592  | 0.000  | P | 122.269  | P | 368.572   | P | 308.400   | LOC_Os10g23220.2 |
| DG <sub>HP</sub> | Os009089_01 | S4 | 1.511  | 0.000  | P | 190.202  | P | 542.201   | P | 209.617   | LOC_Os04g38940.1 |
| DG <sub>HP</sub> | Os009163_01 | S4 | 0.000  | 1.666  | P | 395.405  | P | 350.229   | P | 110.356   | LOC_Os02g05830.1 |
| DG <sub>HP</sub> | Os009179_01 | S4 | 0.000  | 1.578  | P | 178.156  | P | 291.477   | P | 97.639    | LOC_Os04g15690.1 |
| DG <sub>HP</sub> | Os009211_01 | S4 | 0.000  | 1.471  | P | 179.921  | P | 393.625   | P | 142.024   | LOC_Os10g28120.1 |
| DG <sub>HP</sub> | Os009286_01 | S4 | 0.000  | 1.460  | P | 480.697  | P | 633.717   | P | 230.378   | LOC_Os02g34860.1 |
| DG <sub>HP</sub> | Os009287_01 | S4 | 2.207  | 0.000  | P | 508.694  | P | 2348.417  | P | 3948.679  | LOC_Os01g16660.1 |
| DG <sub>HP</sub> | Os009373_01 | S4 | 0.000  | 1.430  | P | 173.707  | P | 339.621   | P | 126.009   | LOC_Os07g30170.1 |
| DG <sub>HP</sub> | Os009577_01 | S4 | 1.996  | 0.000  | P | 467.764  | P | 1865.727  | P | 715.097   | LOC_Os11g16550.1 |
| DG <sub>HP</sub> | Os009664_01 | S4 | 0.000  | 1.668  | P | 909.320  | P | 1313.017  | P | 413.278   | LOC_Os03g04470.1 |
| DG <sub>HP</sub> | Os009787_01 | S4 | 0.000  | -1.680 | P | 270.966  | P | 643.513   | P | 2061.516  | LOC_Os07g23120.1 |
| DG <sub>HP</sub> | Os009858_01 | S4 | 0.000  | 1.459  | P | 502.486  | P | 618.530   | P | 224.996   | LOC_Os09g02270.1 |
| DG <sub>HP</sub> | Os009876_01 | S4 | 0.000  | 1.542  | P | 269.843  | P | 353.986   | P | 121.552   | -                |
| DG <sub>HP</sub> | Os009921_01 | S4 | 0.000  | 2.617  | P | 1159.682 | P | 1341.565  | P | 218.629   | LOC_Os02g50620.1 |
| DG <sub>HP</sub> | Os009929_01 | S4 | 1.737  | 0.000  | P | 160.898  | P | 536.196   | P | 725.521   | LOC_Os02g31860.1 |
| DG <sub>HP</sub> | Os009934_01 | S4 | 2.353  | 0.000  | P | 242.306  | P | 1238.084  | P | 902.843   | LOC_Os01g49230.1 |
| DG <sub>HP</sub> | Os009935_01 | S4 | 1.600  | 0.000  | P | 2288.657 | P | 6935.692  | P | 13354.758 | LOC_Os04g52060.1 |
| DG <sub>HP</sub> | Os009937_01 | S4 | 1.440  | 0.000  | P | 185.678  | P | 503.796   | P | 627.580   | LOC_Os05g34260.1 |
| DG <sub>HP</sub> | Os009964_01 | S4 | 3.088  | 0.000  | P | 159.270  | P | 1354.195  | P | 2643.818  | LOC_Os09g20880.1 |
| DG <sub>HP</sub> | Os009971_01 | S4 | 7.123  | -1.161 | P | 169.436  | P | 23616.728 | P | 52811.056 | LOC_Os03g05330.1 |
| DG <sub>HP</sub> | Os009986_01 | S4 | -2.393 | 10.000 | P | 2096.008 | P | 399.132   | A | 130.035   | -                |
| DG <sub>HP</sub> | Os009997_01 | S4 | 0.000  | 1.573  | P | 279.420  | P | 255.428   | P | 85.856    | LOC_Os12g26220.1 |
| DG <sub>HP</sub> | Os010001_01 | S4 | 3.000  | 0.000  | P | 332.192  | P | 2657.336  | P | 2455.062  | LOC_Os08g02200.1 |
| DG <sub>HP</sub> | Os010014_01 | S4 | 0.000  | 1.518  | P | 326.894  | P | 407.152   | P | 142.200   | -                |
| DG <sub>HP</sub> | Os010034_01 | S4 | 0.000  | 1.433  | P | 1762.902 | P | 1724.652  | P | 638.944   | LOC_Os01g68940.1 |
| DG <sub>HP</sub> | Os010054_01 | S4 | 0.000  | 1.903  | P | 294.521  | P | 531.702   | P | 142.140   | LOC_Os09g24650.4 |
| DG <sub>HP</sub> | Os010107_01 | S4 | 0.000  | 1.547  | P | 585.914  | P | 516.468   | P | 176.785   | LOC_Os10g42196.1 |
| DG <sub>HP</sub> | Os010115_01 | S4 | 0.000  | -1.206 | P | 637.507  | P | 910.304   | P | 2099.777  | LOC_Os09g36040.1 |
| DG <sub>HP</sub> | Os010117_01 | S4 | 1.973  | 10.000 | P | 1219.485 | P | 4787.088  | A | 3021.859  | LOC_Os05g50840.1 |
| DG <sub>HP</sub> | Os010118_01 | S4 | 0.000  | 1.441  | P | 401.036  | P | 347.625   | P | 128.035   | -                |
| DG <sub>HP</sub> | Os010125_01 | S4 | 2.896  | 0.000  | P | 160.836  | P | 1196.822  | P | 1432.069  | LOC_Os07g06600.1 |

|                  |             |    |        |        |   |           |   |           |   |           |                  |
|------------------|-------------|----|--------|--------|---|-----------|---|-----------|---|-----------|------------------|
| DG <sub>HP</sub> | Os010130_01 | S4 | 0.000  | 1.466  | P | 478.083   | P | 370.564   | P | 134.098   | LOC_Os02g13960.1 |
| DG <sub>HP</sub> | Os010148_01 | S4 | 7.126  | 0.000  | P | 136.040   | P | 19001.727 | P | 38480.253 | -                |
| DG <sub>HP</sub> | Os010152_01 | S4 | 2.024  | 0.000  | P | 116.616   | P | 474.153   | P | 634.634   | -                |
| DG <sub>HP</sub> | Os010171_01 | S4 | -2.098 | 0.000  | P | 1401.721  | P | 327.435   | P | 252.138   | -                |
| DG <sub>HP</sub> | Os010179_01 | S4 | 1.567  | 0.000  | P | 119.337   | P | 353.476   | P | 434.030   | LOC_Os09g30410.1 |
| DG <sub>HP</sub> | Os010193_01 | S4 | 0.000  | 2.462  | P | 944.975   | P | 1429.772  | P | 259.437   | LOC_Os12g34010.1 |
| DG <sub>HP</sub> | Os010211_01 | S4 | 2.152  | 0.000  | P | 182.198   | P | 809.936   | P | 1315.856  | LOC_Os10g41800.1 |
| DG <sub>HP</sub> | Os010217_01 | S4 | 3.993  | 0.000  | P | 109.284   | P | 1740.432  | P | 2503.831  | LOC_Os08g06540.1 |
| DG <sub>HP</sub> | Os010244_01 | S4 | 7.299  | 0.000  | P | 137.544   | P | 21652.658 | P | 47323.171 | -                |
| DG <sub>HP</sub> | Os010260_01 | S4 | 2.956  | 0.000  | P | 138.728   | P | 1076.856  | P | 1688.101  | -                |
| DG <sub>HP</sub> | Os010267_01 | S4 | 0.000  | 1.631  | P | 3427.769  | P | 3385.160  | P | 1093.215  | -                |
| DG <sub>HP</sub> | Os010273_01 | S4 | -1.781 | 0.000  | P | 760.835   | P | 221.360   | P | 217.061   | LOC_Os04g30420.1 |
| DG <sub>HP</sub> | Os010286_01 | S4 | 1.560  | 0.000  | P | 220.439   | P | 649.843   | P | 1190.308  | LOC_Os07g38990.1 |
| DG <sub>HP</sub> | Os010290_01 | S4 | 2.718  | 0.000  | P | 153.002   | P | 1006.495  | P | 923.460   | LOC_Os03g09880.1 |
| DG <sub>HP</sub> | Os010291_01 | S4 | 3.299  | 0.000  | P | 189.502   | P | 1864.533  | P | 1960.108  | LOC_Os01g48710.1 |
| DG <sub>HP</sub> | Os010306_01 | S4 | -1.392 | 0.000  | P | 1358.595  | P | 517.571   | P | 621.025   | LOC_Os06g43810.1 |
| DG <sub>HP</sub> | Os010326_01 | S4 | 3.713  | 0.000  | P | 86.996    | P | 1140.517  | P | 1866.548  | LOC_Os07g43310.1 |
| DG <sub>HP</sub> | Os010344_01 | S4 | 3.839  | 0.000  | P | 112.285   | P | 1606.876  | P | 1966.261  | LOC_Os04g53370.1 |
| DG <sub>HP</sub> | Os010355_01 | S4 | 6.429  | 0.000  | P | 180.603   | P | 15565.852 | P | 31883.952 | -                |
| DG <sub>HP</sub> | Os010372_01 | S4 | 0.000  | 1.471  | P | 32216.657 | P | 17969.609 | P | 6483.866  | LOC_Os01g14410.1 |
| DG <sub>HP</sub> | Os010373_01 | S4 | 0.000  | 1.490  | P | 503.619   | P | 537.452   | P | 191.325   | -                |
| DG <sub>HP</sub> | Os010384_01 | S4 | 0.000  | 1.683  | P | 612.244   | P | 750.665   | P | 233.731   | LOC_Os03g47060.1 |
| DG <sub>HP</sub> | Os010388_01 | S4 | 1.684  | 0.000  | P | 140.964   | P | 452.794   | P | 575.816   | -                |
| DG <sub>HP</sub> | Os010400_01 | S4 | 4.403  | -1.441 | P | 175.214   | P | 3708.073  | P | 10066.630 | LOC_Os07g38540.1 |
| DG <sub>HP</sub> | Os010407_01 | S4 | 2.083  | 0.000  | P | 429.134   | P | 1818.763  | P | 1714.660  | LOC_Os08g08120.3 |
| DG <sub>HP</sub> | Os010416_01 | S4 | 1.573  | 0.000  | P | 188.906   | P | 562.074   | P | 906.103   | LOC_Os08g04340.1 |
| DG <sub>HP</sub> | Os010424_01 | S4 | 4.936  | 0.000  | P | 525.150   | P | 16073.163 | P | 35292.105 | LOC_Os03g15080.2 |
| DG <sub>HP</sub> | Os010435_01 | S4 | 4.166  | 0.000  | P | 276.207   | P | 4956.970  | P | 9344.703  | LOC_Os04g36770.1 |
| DG <sub>HP</sub> | Os010446_01 | S4 | 1.769  | -1.631 | P | 183.134   | P | 623.950   | P | 1933.190  | LOC_Os04g56390.1 |
| DG <sub>HP</sub> | Os010471_01 | S4 | 0.000  | 1.469  | P | 519.850   | P | 516.115   | P | 186.463   | -                |
| DG <sub>HP</sub> | Os010477_01 | S4 | 1.604  | 0.000  | P | 217.454   | P | 660.922   | P | 830.997   | -                |

|                  |             |    |        |        |   |          |   |           |   |           |                  |
|------------------|-------------|----|--------|--------|---|----------|---|-----------|---|-----------|------------------|
| DG <sub>HP</sub> | Os010478_01 | S4 | 3.897  | 0.000  | P | 152.934  | P | 2277.637  | P | 4225.654  | LOC_Os03g50110.1 |
| DG <sub>HP</sub> | Os010480_01 | S4 | 0.000  | 1.485  | P | 263.930  | P | 541.309   | P | 193.433   | LOC_Os08g06010.1 |
| DG <sub>HP</sub> | Os010488_01 | S4 | 2.904  | 0.000  | P | 334.247  | P | 2501.991  | P | 3576.480  | -                |
| DG <sub>HP</sub> | Os010490_01 | S4 | 2.234  | -1.292 | P | 149.763  | P | 704.376   | P | 1724.887  | LOC_Os03g49480.1 |
| DG <sub>HP</sub> | Os010492_01 | S4 | 3.890  | 0.000  | P | 119.891  | P | 1777.161  | P | 1626.455  | LOC_Os04g46930.2 |
| DG <sub>HP</sub> | Os010501_01 | S4 | 0.000  | 2.406  | P | 471.383  | P | 660.990   | P | 124.706   | LOC_Os09g26670.1 |
| DG <sub>HP</sub> | Os010503_01 | S4 | 7.377  | 0.000  | P | 128.082  | P | 21297.701 | P | 31044.783 | LOC_Os06g49690.1 |
| DG <sub>HP</sub> | Os010521_01 | S4 | 0.000  | 1.656  | P | 1618.463 | P | 1590.784  | P | 504.831   | LOC_Os10g37350.1 |
| DG <sub>HP</sub> | Os010568_01 | S4 | 3.204  | 0.000  | P | 110.453  | P | 1017.902  | P | 637.859   | LOC_Os01g60260.2 |
| DG <sub>HP</sub> | Os010592_01 | S4 | 0.000  | 1.894  | P | 2041.223 | P | 2238.927  | P | 602.569   | LOC_Os04g32310.1 |
| DG <sub>HP</sub> | Os010606_01 | S4 | 4.611  | 0.000  | P | 190.094  | P | 4643.920  | P | 9020.575  | LOC_Os10g02490.2 |
| DG <sub>HP</sub> | Os010623_01 | S4 | 7.532  | 0.000  | P | 127.622  | P | 23618.982 | P | 35241.142 | LOC_Os04g42490.1 |
| DG <sub>HP</sub> | Os010845_01 | S4 | 0.000  | 1.586  | P | 207.401  | P | 314.744   | P | 104.807   | -                |
| DG <sub>HP</sub> | Os010870_01 | S4 | 0.000  | 1.764  | P | 217.095  | P | 492.140   | P | 144.923   | -                |
| DG <sub>HP</sub> | Os010929_01 | S4 | 0.000  | 1.800  | P | 268.787  | P | 341.274   | P | 98.030    | LOC_Os01g27210.1 |
| DG <sub>HP</sub> | Os010930_01 | S4 | 1.632  | 10.000 | P | 165.941  | P | 514.226   | A | 19.545    | LOC_Os06g29730.1 |
| DG <sub>HP</sub> | Os011134_01 | S4 | 1.622  | 0.000  | P | 200.299  | P | 616.668   | P | 866.956   | LOC_Os01g37000.1 |
| DG <sub>HP</sub> | Os011337_01 | S4 | 1.573  | 10.000 | P | 81.780   | P | 243.269   | A | 47.460    | -                |
| DG <sub>HP</sub> | Os011344_01 | S4 | 0.000  | 1.577  | P | 1612.553 | P | 1290.167  | P | 432.360   | -                |
| DG <sub>HP</sub> | Os011442_01 | S4 | -1.385 | 0.000  | P | 553.245  | P | 211.856   | P | 180.051   | LOC_Os01g53280.2 |
| DG <sub>HP</sub> | Os011506_01 | S4 | 1.540  | 0.000  | P | 97.512   | P | 283.645   | P | 213.771   | -                |
| DG <sub>HP</sub> | Os011562_01 | S4 | 1.701  | 10.000 | P | 130.462  | P | 424.287   | A | -30.154   | LOC_Os04g08410.1 |
| DG <sub>HP</sub> | Os011563_01 | S4 | -1.222 | 10.000 | P | 862.368  | P | 369.617   | A | 17.904    | LOC_Os03g13810.1 |
| DG <sub>HP</sub> | Os011581_01 | S4 | 0.000  | 2.215  | P | 1219.595 | P | 1069.074  | P | 230.218   | LOC_Os03g58580.1 |
| DG <sub>HP</sub> | Os011582_01 | S4 | 0.000  | 1.531  | P | 272.352  | P | 423.628   | P | 146.590   | LOC_Os03g13380.1 |
| DG <sub>HP</sub> | Os011585_01 | S4 | 1.509  | 0.000  | P | 116.178  | P | 330.684   | P | 144.492   | LOC_Os01g61890.1 |
| DG <sub>HP</sub> | Os011627_01 | S4 | 0.000  | 1.454  | P | 326.524  | P | 339.838   | P | 124.080   | LOC_Os05g38180.1 |
| DG <sub>HP</sub> | Os011630_01 | S4 | 1.479  | 0.000  | P | 126.631  | P | 352.886   | P | 359.434   | LOC_Os08g39440.2 |
| DG <sub>HP</sub> | Os011636_01 | S4 | 1.749  | 0.000  | P | 90.514   | P | 304.346   | P | 217.773   | LOC_Os08g36994.1 |
| DG <sub>HP</sub> | Os011643_01 | S4 | -1.490 | 0.000  | P | 1118.854 | P | 398.284   | P | 531.045   | LOC_Os06g14420.1 |
| DG <sub>HP</sub> | Os011647_01 | S4 | 0.000  | 1.575  | P | 1331.159 | P | 2374.875  | P | 797.148   | LOC_Os02g51020.1 |

|                  |             |    |        |        |   |          |   |          |   |          |                  |
|------------------|-------------|----|--------|--------|---|----------|---|----------|---|----------|------------------|
| DG <sub>HP</sub> | Os011700_01 | S4 | 1.432  | 0.000  | P | 106.792  | P | 288.233  | P | 322.801  | LOC_Os01g40330.1 |
| DG <sub>HP</sub> | Os011717_01 | S4 | 0.000  | 1.616  | P | 252.519  | P | 350.290  | P | 114.310  | LOC_Os04g47970.1 |
| DG <sub>HP</sub> | Os011721_01 | S4 | 10.000 | 1.774  | A | 152.169  | P | 433.365  | P | 126.745  | -                |
| DG <sub>HP</sub> | Os011789_01 | S4 | 1.470  | 0.000  | P | 237.382  | P | 657.401  | P | 498.371  | LOC_Os01g32080.1 |
| DG <sub>HP</sub> | Os011793_01 | S4 | 0.000  | 1.511  | P | 1619.534 | P | 1731.509 | P | 607.380  | LOC_Os03g20100.1 |
| DG <sub>HP</sub> | Os011803_01 | S4 | 1.784  | 10.000 | P | 108.538  | P | 373.764  | A | 37.603   | LOC_Os01g37770.1 |
| DG <sub>HP</sub> | Os011861_01 | S4 | 0.000  | 1.588  | P | 190.738  | P | 386.969  | P | 128.701  | LOC_Os08g39350.1 |
| DG <sub>HP</sub> | Os011874_01 | S4 | -1.221 | 0.000  | P | 1177.197 | P | 505.001  | P | 238.198  | LOC_Os03g47610.8 |
| DG <sub>HP</sub> | Os011937_01 | S4 | 1.434  | 1.935  | P | 176.105  | P | 475.743  | P | 124.422  | LOC_Os08g44370.1 |
| DG <sub>HP</sub> | Os011939_01 | S4 | 1.901  | 10.000 | P | 88.870   | P | 332.012  | A | 47.287   | LOC_Os01g61320.2 |
| DG <sub>HP</sub> | Os011940_01 | S4 | 1.476  | 10.000 | P | 84.343   | P | 234.565  | A | 25.399   | LOC_Os07g08950.2 |
| DG <sub>HP</sub> | Os011973_01 | S4 | -1.620 | 0.000  | P | 1171.198 | P | 381.004  | P | 344.663  | LOC_Os09g25760.1 |
| DG <sub>HP</sub> | Os011979_01 | S4 | 0.000  | 1.678  | P | 471.488  | P | 947.023  | P | 295.887  | LOC_Os06g35160.1 |
| DG <sub>HP</sub> | Os011982_01 | S4 | 1.440  | 0.000  | P | 259.592  | P | 704.266  | P | 490.021  | LOC_Os09g24990.2 |
| DG <sub>HP</sub> | Os012012_01 | S4 | 1.560  | 0.000  | P | 93.821   | P | 276.599  | P | 230.021  | LOC_Os04g47240.3 |
| DG <sub>HP</sub> | Os012028_01 | S4 | -1.148 | 0.000  | P | 8662.026 | P | 3909.461 | P | 8501.362 | LOC_Os11g47760.1 |
| DG <sub>HP</sub> | Os012039_01 | S4 | 0.000  | -1.150 | P | 2341.457 | P | 1580.394 | P | 3506.575 | LOC_Os03g14860.1 |
| DG <sub>HP</sub> | Os012095_01 | S4 | 1.956  | 10.000 | P | 133.910  | P | 519.650  | A | 24.532   | LOC_Os02g57060.1 |
| DG <sub>HP</sub> | Os012134_01 | S4 | 0.000  | 1.468  | P | 344.218  | P | 406.801  | P | 147.071  | LOC_Os08g04280.2 |
| DG <sub>HP</sub> | Os012153_01 | S4 | 1.670  | 0.000  | P | 130.560  | P | 415.547  | P | 213.618  | LOC_Os01g10890.1 |
| DG <sub>HP</sub> | Os012159_01 | S4 | 1.930  | 0.000  | P | 206.206  | P | 785.575  | P | 1052.518 | LOC_Os12g01140.1 |
| DG <sub>HP</sub> | Os012284_01 | S4 | 1.487  | 0.000  | P | 142.702  | P | 399.889  | P | 327.076  | LOC_Os09g16950.1 |
| DG <sub>HP</sub> | Os012314_01 | S4 | 0.000  | 1.508  | P | 427.393  | P | 565.786  | P | 198.881  | LOC_Os07g31380.1 |
| DG <sub>HP</sub> | Os012333_01 | S4 | 1.489  | 10.000 | P | 114.190  | P | 320.485  | A | 35.160   | LOC_Os02g49992.1 |
| DG <sub>HP</sub> | Os012349_01 | S4 | -1.400 | 0.000  | P | 3707.618 | P | 1405.222 | P | 2225.067 | LOC_Os03g61220.1 |
| DG <sub>HP</sub> | Os012366_01 | S4 | 0.000  | 1.443  | P | 169.782  | P | 226.510  | P | 83.292   | LOC_Os07g06710.1 |
| DG <sub>HP</sub> | Os012383_01 | S4 | 0.000  | 1.827  | P | 196.666  | P | 335.813  | P | 94.654   | LOC_Os07g04240.1 |
| DG <sub>HP</sub> | Os012435_01 | S4 | 1.606  | 0.000  | P | 281.402  | P | 856.895  | P | 940.066  | LOC_Os05g41930.3 |
| DG <sub>HP</sub> | Os012453_01 | S4 | 2.006  | 0.000  | P | 77.238   | P | 310.296  | P | 133.849  | LOC_Os03g25720.1 |
| DG <sub>HP</sub> | Os012505_01 | S4 | 0.000  | 1.581  | P | 373.937  | P | 464.058  | P | 155.140  | LOC_Os04g48390.1 |
| DG <sub>HP</sub> | Os012533_01 | S4 | -1.391 | 0.000  | P | 1563.777 | P | 596.203  | P | 580.368  | LOC_Os06g06290.3 |



|                  |             |    |        |        |   |          |   |         |   |          |                  |
|------------------|-------------|----|--------|--------|---|----------|---|---------|---|----------|------------------|
| DG <sub>HP</sub> | Os012556_01 | S4 | 0.000  | 1.725  | P | 283.402  | P | 346.745 | P | 104.863  | LOC_Os02g51500.2 |
| DG <sub>HP</sub> | Os012583_01 | S4 | 1.650  | 0.000  | P | 190.093  | P | 596.620 | P | 601.100  | LOC_Os01g39960.1 |
| DG <sub>HP</sub> | Os012670_01 | S4 | 2.353  | 0.000  | P | 176.773  | P | 903.287 | P | 627.695  | LOC_Os04g33310.1 |
| DG <sub>HP</sub> | Os012695_01 | S4 | 1.741  | 0.000  | P | 135.930  | P | 454.383 | P | 289.506  | LOC_Os02g43519.1 |
| DG <sub>HP</sub> | Os012742_01 | S4 | 0.000  | 1.550  | P | 109.334  | P | 267.857 | P | 91.452   | LOC_Os07g16130.1 |
| DG <sub>HP</sub> | Os012762_01 | S4 | 1.606  | 10.000 | P | 116.087  | P | 353.346 | A | -11.731  | LOC_Os09g39230.1 |
| DG <sub>HP</sub> | Os012828_01 | S4 | 0.000  | 1.417  | P | 178.354  | P | 306.934 | P | 114.947  | LOC_Os02g41470.3 |
| DG <sub>HP</sub> | Os012865_01 | S4 | 0.000  | 1.573  | P | 463.035  | P | 516.768 | P | 173.671  | LOC_Os11g04030.1 |
| DG <sub>HP</sub> | Os012890_01 | S4 | -1.992 | 0.000  | P | 1585.490 | P | 398.593 | P | 486.381  | LOC_Os01g63620.1 |
| DG <sub>HP</sub> | Os012904_01 | S4 | 0.000  | 1.402  | P | 177.480  | P | 362.216 | P | 137.075  | LOC_Os12g02390.1 |
| DG <sub>HP</sub> | Os012910_01 | S4 | 0.000  | -1.624 | P | 429.694  | P | 402.015 | P | 1239.126 | LOC_Os12g38170.1 |
| DG <sub>HP</sub> | Os012919_01 | S4 | 0.000  | -1.500 | P | 772.632  | P | 920.764 | P | 2603.706 | LOC_Os01g11054.1 |
| DG <sub>HP</sub> | Os012922_01 | S4 | 0.000  | 1.439  | P | 177.465  | P | 439.307 | P | 162.078  | LOC_Os02g47410.2 |
| DG <sub>HP</sub> | Os012940_01 | S4 | 1.447  | 0.000  | P | 112.819  | P | 307.495 | P | 153.704  | LOC_Os03g42820.2 |
| DG <sub>HP</sub> | Os012943_01 | S4 | 1.627  | 10.000 | P | 168.161  | P | 519.411 | A | 62.058   | LOC_Os04g51809.1 |
| DG <sub>HP</sub> | Os012955_01 | S4 | -1.174 | 10.000 | P | 444.458  | P | 196.958 | A | 38.450   | LOC_Os12g14440.1 |
| DG <sub>HP</sub> | Os012985_01 | S4 | 1.574  | 10.000 | P | 112.851  | P | 335.944 | A | -5.786   | LOC_Os07g43720.1 |
| DG <sub>HP</sub> | Os013038_01 | S4 | 0.000  | 1.523  | P | 601.461  | P | 660.578 | P | 229.826  | LOC_Os02g53180.2 |
| DG <sub>HP</sub> | Os013059_01 | S4 | 0.000  | -1.843 | P | 758.147  | P | 394.541 | P | 1415.569 | LOC_Os03g06630.1 |
| DG <sub>HP</sub> | Os013065_01 | S4 | 1.907  | 10.000 | P | 74.641   | P | 279.901 | A | 9.658    | LOC_Os03g02850.2 |
| DG <sub>HP</sub> | Os013118_01 | S4 | 1.441  | 10.000 | P | 113.621  | P | 308.384 | A | 23.738   | LOC_Os03g22420.1 |
| DG <sub>HP</sub> | Os013140_01 | S4 | 1.957  | 10.000 | P | 70.823   | P | 274.974 | A | 59.465   | LOC_Os07g28940.1 |
| DG <sub>HP</sub> | Os013160_01 | S4 | 1.865  | 0.000  | P | 92.576   | P | 337.155 | P | 148.598  | LOC_Os09g32450.1 |
| DG <sub>HP</sub> | Os013181_01 | S4 | 0.000  | 1.526  | P | 117.982  | P | 269.029 | P | 93.405   | LOC_Os04g52690.3 |
| DG <sub>HP</sub> | Os013188_01 | S4 | 1.508  | 0.000  | P | 177.308  | P | 504.288 | P | 310.841  | LOC_Os10g25570.2 |
| DG <sub>HP</sub> | Os013257_01 | S4 | 1.799  | 0.000  | P | 61.713   | P | 214.682 | P | 95.899   | LOC_Os04g36058.2 |
| DG <sub>HP</sub> | Os013275_01 | S4 | 1.578  | 10.000 | P | 105.206  | P | 314.034 | A | 37.420   | LOC_Os08g01320.1 |
| DG <sub>HP</sub> | Os013306_01 | S4 | 2.266  | 10.000 | P | 84.712   | P | 407.539 | A | 50.177   | -                |
| DG <sub>HP</sub> | Os013328_01 | S4 | 1.511  | 10.000 | P | 107.347  | P | 305.931 | A | 44.898   | LOC_Os04g58390.1 |
| DG <sub>HP</sub> | Os013375_01 | S4 | 1.621  | 10.000 | P | 115.799  | P | 356.202 | A | 26.984   | LOC_Os04g32110.1 |
| DG <sub>HP</sub> | Os013387_01 | S4 | 0.000  | 1.496  | P | 368.349  | P | 455.148 | P | 161.422  | -                |

|                  |             |    |        |        |   |          |   |          |   |          |                  |
|------------------|-------------|----|--------|--------|---|----------|---|----------|---|----------|------------------|
| DG <sub>HP</sub> | Os013415_01 | S4 | 1.894  | 0.000  | P | 114.837  | P | 426.802  | P | 172.218  | LOC_Os01g12320.1 |
| DG <sub>HP</sub> | Os013432_01 | S4 | 0.000  | -1.186 | P | 1028.047 | P | 513.787  | P | 1168.713 | -                |
| DG <sub>HP</sub> | Os013473_01 | S4 | 0.000  | 1.459  | P | 185.088  | P | 252.812  | P | 91.984   | LOC_Os02g48340.3 |
| DG <sub>HP</sub> | Os013490_01 | S4 | 0.000  | 1.403  | P | 104.880  | P | 264.319  | P | 99.977   | LOC_Os10g05020.1 |
| DG <sub>HP</sub> | Os013530_01 | S4 | 0.000  | 1.953  | P | 616.154  | P | 482.351  | P | 124.593  | LOC_Os08g30060.2 |
| DG <sub>HP</sub> | Os013539_01 | S4 | 1.722  | 10.000 | P | 65.430   | P | 215.813  | A | 46.469   | LOC_Os05g46890.1 |
| DG <sub>HP</sub> | Os013541_01 | S4 | 1.683  | 0.000  | P | 119.919  | P | 385.122  | P | 485.252  | LOC_Os10g22510.1 |
| DG <sub>HP</sub> | Os013556_01 | S4 | 2.424  | 0.000  | P | 62.731   | P | 336.544  | P | 244.819  | LOC_Os02g35560.1 |
| DG <sub>HP</sub> | Os013562_01 | S4 | 0.000  | 1.789  | P | 222.729  | P | 316.945  | P | 91.722   | LOC_Os12g06650.1 |
| DG <sub>HP</sub> | Os013653_01 | S4 | 1.956  | 0.000  | P | 155.898  | P | 605.051  | P | 481.622  | LOC_Os09g34140.2 |
| DG <sub>HP</sub> | Os013659_01 | S4 | -2.260 | -1.158 | P | 3433.781 | P | 716.640  | P | 1599.216 | LOC_Os03g60080.1 |
| DG <sub>HP</sub> | Os013665_01 | S4 | 1.744  | 0.000  | P | 83.830   | P | 280.861  | P | 118.724  | LOC_Os06g43560.1 |
| DG <sub>HP</sub> | Os013679_01 | S4 | 10.000 | 1.710  | A | 151.796  | P | 478.736  | P | 146.316  | LOC_Os07g39560.3 |
| DG <sub>HP</sub> | Os013684_01 | S4 | 1.447  | 0.000  | P | 142.971  | P | 389.691  | P | 394.546  | -                |
| DG <sub>HP</sub> | Os013728_01 | S4 | 0.000  | 1.645  | P | 402.548  | P | 490.894  | P | 156.930  | LOC_Os01g07250.1 |
| DG <sub>HP</sub> | Os013730_01 | S4 | 1.515  | 0.000  | P | 77.798   | P | 222.397  | P | 146.891  | LOC_Os03g08370.1 |
| DG <sub>HP</sub> | Os013775_01 | S4 | 1.695  | 0.000  | P | 168.634  | P | 546.126  | P | 926.899  | LOC_Os01g48930.1 |
| DG <sub>HP</sub> | Os013799_01 | S4 | 1.910  | 0.000  | P | 69.183   | P | 259.931  | P | 114.094  | LOC_Os08g39694.2 |
| DG <sub>HP</sub> | Os013819_01 | S4 | 1.609  | 10.000 | P | 95.911   | P | 292.617  | A | 36.882   | LOC_Os01g37050.1 |
| DG <sub>HP</sub> | Os013853_01 | S4 | 1.732  | 10.000 | P | 81.002   | P | 269.135  | A | 40.034   | LOC_Os02g10510.1 |
| DG <sub>HP</sub> | Os013889_01 | S4 | 1.827  | 0.000  | P | 242.163  | P | 859.111  | P | 694.658  | LOC_Os04g38750.1 |
| DG <sub>HP</sub> | Os013911_01 | S4 | 0.000  | 1.662  | P | 167.616  | P | 308.539  | P | 97.481   | LOC_Os07g34830.1 |
| DG <sub>HP</sub> | Os013918_01 | S4 | 0.000  | -1.178 | P | 517.418  | P | 288.416  | P | 652.558  | LOC_Os09g29070.1 |
| DG <sub>HP</sub> | Os013945_01 | S4 | -1.591 | 0.000  | P | 1820.218 | P | 604.145  | P | 601.427  | LOC_Os03g38950.1 |
| DG <sub>HP</sub> | Os013985_01 | S4 | 1.562  | 10.000 | P | 96.597   | P | 285.295  | A | -20.478  | LOC_Os04g32330.1 |
| DG <sub>HP</sub> | Os013991_01 | S4 | 0.000  | 1.567  | P | 670.246  | P | 581.812  | P | 196.358  | LOC_Os02g57290.4 |
| DG <sub>HP</sub> | Os014025_01 | S4 | 1.981  | 0.000  | P | 123.616  | P | 488.067  | P | 590.247  | -                |
| DG <sub>HP</sub> | Os014115_01 | S4 | 1.590  | 0.000  | P | 117.077  | P | 352.386  | P | 292.500  | LOC_Os10g37860.1 |
| DG <sub>HP</sub> | Os014132_01 | S4 | 2.056  | 0.000  | P | 67.965   | P | 282.672  | P | 216.491  | LOC_Os06g14550.1 |
| DG <sub>HP</sub> | Os014147_01 | S4 | 0.000  | 1.611  | P | 869.719  | P | 928.815  | P | 304.083  | LOC_Os02g54990.2 |
| DG <sub>HP</sub> | Os014249_01 | S4 | 0.000  | -1.497 | P | 1705.887 | P | 1061.043 | P | 2994.888 | LOC_Os06g28194.1 |

|                  |             |    |        |        |   |          |   |          |   |          |                  |
|------------------|-------------|----|--------|--------|---|----------|---|----------|---|----------|------------------|
| DG <sub>HP</sub> | Os014252_01 | S4 | 0.000  | 1.486  | P | 445.429  | P | 717.919  | P | 256.258  | LOC_Os02g22260.1 |
| DG <sub>HP</sub> | Os014307_01 | S4 | -1.140 | 0.000  | P | 704.128  | P | 319.553  | P | 134.247  | LOC_Os07g32630.1 |
| DG <sub>HP</sub> | Os014364_01 | S4 | 2.778  | -1.683 | P | 347.372  | P | 2382.061 | P | 7650.920 | LOC_Os01g45914.1 |
| DG <sub>HP</sub> | Os014412_01 | S4 | 10.000 | 2.238  | A | 166.035  | P | 611.126  | P | 129.537  | LOC_Os04g35700.1 |
| DG <sub>HP</sub> | Os014548_01 | S4 | 2.023  | 10.000 | P | 84.945   | P | 345.164  | A | 25.581   | LOC_Os05g49060.1 |
| DG <sub>HP</sub> | Os014656_01 | S4 | 0.000  | 1.413  | P | 390.672  | P | 307.702  | P | 115.564  | LOC_Os01g40820.1 |
| DG <sub>HP</sub> | Os014662_01 | S4 | 0.000  | 1.813  | P | 494.338  | P | 394.158  | P | 112.190  | LOC_Os03g17580.1 |
| DG <sub>HP</sub> | Os014712_01 | S4 | 1.737  | 0.000  | P | 101.826  | P | 339.373  | P | 258.974  | LOC_Os04g41460.1 |
| DG <sub>HP</sub> | Os014740_01 | S4 | 1.758  | 0.000  | P | 1908.198 | P | 6453.257 | P | 6421.947 | LOC_Os07g36080.1 |
| DG <sub>HP</sub> | Os014777_01 | S4 | -1.150 | 0.000  | P | 350.384  | P | 157.925  | P | 271.231  | LOC_Os03g02750.1 |
| DG <sub>HP</sub> | Os014969_01 | S4 | -1.067 | 0.000  | P | 340.126  | P | 162.388  | P | 191.442  | LOC_Os01g46570.1 |
| DG <sub>HP</sub> | Os015092_01 | S4 | -1.121 | 0.000  | P | 347.027  | P | 159.520  | P | 197.216  | LOC_Os09g22000.1 |
| DG <sub>HP</sub> | Os015128_01 | S4 | -1.523 | -1.553 | P | 400.136  | P | 139.208  | P | 408.442  | LOC_Os02g04210.1 |
| DG <sub>HP</sub> | Os015155_01 | S4 | 2.427  | 0.000  | P | 117.491  | P | 631.698  | P | 505.651  | LOC_Os01g71590.3 |
| DG <sub>HP</sub> | Os015272_01 | S4 | -1.362 | 0.000  | P | 405.315  | P | 157.662  | P | 281.589  | LOC_Os07g02780.1 |
| DG <sub>HP</sub> | Os015282_01 | S4 | -1.175 | 0.000  | P | 445.441  | P | 197.336  | P | 200.243  | LOC_Os05g14180.1 |
| DG <sub>HP</sub> | Os015375_01 | S4 | 0.000  | -1.659 | P | 387.389  | P | 217.765  | P | 687.656  | LOC_Os08g37390.1 |
| DG <sub>HP</sub> | Os015556_01 | S4 | -1.130 | -1.280 | P | 334.223  | P | 152.705  | P | 370.816  | LOC_Os03g41060.1 |
| DG <sub>HP</sub> | Os015684_01 | S4 | -1.100 | 0.000  | P | 830.777  | P | 387.687  | P | 244.118  | -                |
| DG <sub>HP</sub> | Os015843_01 | S4 | -1.517 | 0.000  | P | 418.267  | P | 146.138  | P | 214.304  | LOC_Os03g08310.1 |
| DG <sub>HP</sub> | Os015919_01 | S4 | -1.838 | 0.000  | P | 1165.453 | P | 326.030  | P | 279.465  | LOC_Os03g44010.2 |
| DG <sub>HP</sub> | Os015934_01 | S4 | -1.432 | 0.000  | P | 2428.918 | P | 900.408  | P | 1508.315 | LOC_Os04g54630.1 |
| DG <sub>HP</sub> | Os015952_01 | S4 | 1.851  | 0.000  | P | 499.703  | P | 1802.787 | P | 2350.812 | LOC_Os10g37280.1 |
| DG <sub>HP</sub> | Os015981_01 | S4 | 0.000  | 1.638  | P | 329.090  | P | 382.708  | P | 122.980  | LOC_Os04g36050.1 |
| DG <sub>HP</sub> | Os016112_01 | S4 | -1.100 | 0.000  | P | 435.703  | P | 203.224  | P | 295.330  | LOC_Os04g38720.1 |
| DG <sub>HP</sub> | Os016132_01 | S4 | 3.079  | 0.000  | P | 184.648  | P | 1560.633 | P | 2686.555 | LOC_Os04g14190.1 |
| DG <sub>HP</sub> | Os016152_01 | S4 | 1.516  | 0.000  | P | 874.575  | P | 2501.430 | P | 3347.606 | -                |
| DG <sub>HP</sub> | Os016162_01 | S4 | 0.000  | 1.527  | P | 351.876  | P | 362.419  | P | 125.740  | LOC_Os11g38800.2 |
| DG <sub>HP</sub> | Os016183_01 | S4 | -1.037 | 0.000  | P | 386.902  | P | 188.556  | P | 259.947  | -                |
| DG <sub>HP</sub> | Os016221_01 | S4 | -1.199 | 0.000  | P | 444.684  | P | 193.759  | P | 250.765  | LOC_Os05g02060.1 |
| DG <sub>HP</sub> | Os016404_01 | S4 | 1.608  | 0.000  | P | 1246.669 | P | 3800.107 | P | 6181.756 | LOC_Os01g15610.1 |

|                  |             |    |        |        |   |          |   |          |   |          |                  |
|------------------|-------------|----|--------|--------|---|----------|---|----------|---|----------|------------------|
| DG <sub>HP</sub> | Os016477_01 | S4 | -1.087 | 0.000  | P | 430.653  | P | 202.723  | P | 260.788  | LOC_Os04g10160.1 |
| DG <sub>HP</sub> | Os016486_01 | S4 | 0.000  | 1.452  | P | 286.979  | P | 335.665  | P | 122.663  | LOC_Os05g07090.1 |
| DG <sub>HP</sub> | Os016859_01 | S4 | -1.728 | 0.000  | P | 1032.905 | P | 311.803  | P | 438.177  | LOC_Os05g37520.1 |
| DG <sub>HP</sub> | Os016868_01 | S4 | -1.643 | 0.000  | P | 458.943  | P | 146.969  | P | 196.566  | LOC_Os01g51980.1 |
| DG <sub>HP</sub> | Os016869_01 | S4 | -1.291 | 0.000  | P | 6824.568 | P | 2789.788 | P | 3208.289 | LOC_Os01g08700.6 |
| DG <sub>HP</sub> | Os016907_01 | S4 | 0.000  | 1.836  | P | 639.559  | P | 387.323  | P | 108.476  | LOC_Os11g40590.3 |
| DG <sub>HP</sub> | Os016919_01 | S4 | 0.000  | 1.731  | P | 871.153  | P | 1434.147 | P | 431.981  | LOC_Os02g01590.1 |
| DG <sub>HP</sub> | Os016931_01 | S4 | 0.000  | 1.463  | P | 331.039  | P | 341.925  | P | 123.987  | LOC_Os11g11100.1 |
| DG <sub>HP</sub> | Os017149_01 | S4 | 0.000  | -1.256 | P | 1275.499 | P | 1646.397 | P | 3931.311 | LOC_Os03g01030.1 |
| DG <sub>HP</sub> | Os017243_01 | S4 | -1.331 | 0.000  | P | 355.602  | P | 141.380  | P | 193.424  | LOC_Os03g49380.1 |
| DG <sub>HP</sub> | Os017305_01 | S4 | 0.000  | -1.228 | P | 619.981  | P | 1249.267 | P | 2927.048 | -                |
| DG <sub>HP</sub> | Os017440_01 | S4 | -1.050 | 0.000  | P | 438.055  | P | 211.628  | P | 230.772  | LOC_Os10g01134.1 |
| DG <sub>HP</sub> | Os017728_01 | S4 | -1.173 | 0.000  | P | 366.341  | P | 162.478  | P | 189.676  | LOC_Os03g63730.1 |
| DG <sub>HP</sub> | Os017734_01 | S4 | -1.066 | 0.000  | P | 337.881  | P | 161.350  | P | 202.982  | LOC_Os03g02720.1 |
| DG <sub>HP</sub> | Os017820_01 | S4 | 0.000  | 1.404  | P | 1269.154 | P | 838.610  | P | 316.947  | LOC_Os04g36062.1 |
| DG <sub>HP</sub> | Os017851_01 | S4 | -1.398 | -1.280 | P | 4084.627 | P | 1550.383 | P | 3763.643 | LOC_Os06g22960.1 |
| DG <sub>HP</sub> | Os017861_01 | S4 | -1.140 | 0.000  | P | 469.838  | P | 213.225  | P | 187.218  | LOC_Os01g67030.1 |
| DG <sub>HP</sub> | Os017943_01 | S4 | -1.974 | 0.000  | P | 5174.799 | P | 1316.784 | P | 1641.251 | LOC_Os07g12340.1 |
| DG <sub>HP</sub> | Os017954_01 | S4 | 0.000  | 1.866  | P | 926.876  | P | 856.205  | P | 234.847  | LOC_Os08g04840.1 |
| DG <sub>HP</sub> | Os018043_01 | S4 | -1.384 | 0.000  | P | 607.031  | P | 232.536  | P | 305.749  | LOC_Os02g30840.1 |
| DG <sub>HP</sub> | Os018061_01 | S4 | -1.157 | 0.000  | P | 442.731  | P | 198.579  | P | 189.746  | LOC_Os03g15120.1 |
| DG <sub>HP</sub> | Os018086_01 | S4 | -1.347 | 0.000  | P | 1244.132 | P | 489.154  | P | 388.490  | -                |
| DG <sub>HP</sub> | Os018190_01 | S4 | 0.000  | 1.900  | P | 444.104  | P | 410.004  | P | 109.872  | LOC_Os01g43700.2 |
| DG <sub>HP</sub> | Os018196_01 | S4 | -1.484 | 0.000  | P | 872.117  | P | 311.686  | P | 192.298  | LOC_Os03g55070.2 |
| DG <sub>HP</sub> | Os018214_01 | S4 | 0.000  | 1.607  | P | 516.618  | P | 467.041  | P | 153.299  | LOC_Os08g12750.2 |
| DG <sub>HP</sub> | Os018265_01 | S4 | -1.129 | 0.000  | P | 1089.470 | P | 498.240  | P | 403.221  | LOC_Os11g05260.1 |
| DG <sub>HP</sub> | Os018314_01 | S4 | -1.219 | 0.000  | P | 1844.997 | P | 792.369  | P | 474.849  | LOC_Os01g50050.1 |
| DG <sub>HP</sub> | Os018329_01 | S4 | -1.718 | 0.000  | P | 4979.525 | P | 1513.425 | P | 3247.300 | LOC_Os03g19720.1 |
| DG <sub>HP</sub> | Os018334_01 | S4 | -1.098 | -1.883 | P | 3780.974 | P | 1766.311 | P | 6516.096 | LOC_Os03g50870.1 |
| DG <sub>HP</sub> | Os018361_01 | S4 | -1.377 | 0.000  | P | 584.048  | P | 224.840  | P | 171.287  | LOC_Os05g39930.1 |
| DG <sub>HP</sub> | Os018411_01 | S4 | 0.000  | 1.493  | P | 138.789  | P | 198.268  | P | 70.462   | LOC_Os11g43510.1 |

|                  |             |    |        |        |   |          |   |          |   |          |                  |
|------------------|-------------|----|--------|--------|---|----------|---|----------|---|----------|------------------|
| DG <sub>HP</sub> | Os018535_01 | S4 | 0.000  | -1.673 | P | 1565.398 | P | 1294.047 | P | 4127.347 | LOC_Os12g38180.1 |
| DG <sub>HP</sub> | Os018550_01 | S4 | -1.108 | 0.000  | P | 962.182  | P | 446.417  | P | 306.862  | LOC_Os06g08740.1 |
| DG <sub>HP</sub> | Os018766_01 | S4 | -1.280 | 0.000  | P | 2146.747 | P | 883.796  | P | 571.001  | LOC_Os04g40670.1 |
| DG <sub>HP</sub> | Os018818_01 | S4 | -1.092 | 0.000  | P | 897.818  | P | 421.055  | P | 390.993  | -                |
| DG <sub>HP</sub> | Os018989_01 | S4 | 0.000  | 2.352  | P | 1147.847 | P | 876.495  | P | 171.634  | LOC_Os02g56850.3 |
| DG <sub>HP</sub> | Os018995_01 | S4 | -1.216 | 0.000  | P | 413.716  | P | 178.155  | P | 119.684  | LOC_Os03g15710.1 |
| DG <sub>HP</sub> | Os019078_01 | S4 | 0.000  | -1.269 | P | 297.168  | P | 156.434  | P | 377.099  | -                |
| DG <sub>HP</sub> | Os019092_01 | S4 | 0.000  | 1.417  | P | 137.461  | P | 221.055  | P | 82.782   | LOC_Os01g74530.2 |
| DG <sub>HP</sub> | Os019192_01 | S4 | 0.000  | 1.454  | P | 171.600  | P | 274.577  | P | 100.231  | LOC_Os05g07650.1 |
| DG <sub>HP</sub> | Os019223_01 | S4 | 0.000  | -1.235 | P | 826.232  | P | 580.677  | P | 1366.588 | LOC_Os11g38650.1 |
| DG <sub>HP</sub> | Os019298_01 | S4 | 0.000  | 1.504  | P | 686.474  | P | 656.151  | P | 231.374  | LOC_Os04g35570.1 |
| DG <sub>HP</sub> | Os019400_01 | S4 | -2.028 | 0.000  | P | 1397.183 | P | 342.639  | P | 289.000  | LOC_Os01g70790.1 |
| DG <sub>HP</sub> | Os019412_01 | S4 | 0.000  | 1.655  | P | 528.494  | P | 439.362  | P | 139.471  | LOC_Os04g56140.1 |
| DG <sub>HP</sub> | Os019413_01 | S4 | 0.000  | -1.461 | P | 693.819  | P | 808.471  | P | 2225.290 | LOC_Os07g49110.1 |
| DG <sub>HP</sub> | Os019688_01 | S4 | 0.000  | -1.174 | P | 1010.166 | P | 1122.853 | P | 2534.019 | LOC_Os04g02820.2 |
| DG <sub>HP</sub> | Os019712_01 | S4 | 1.847  | 0.000  | P | 327.278  | P | 1177.192 | P | 1817.385 | LOC_Os02g11060.1 |
| DG <sub>HP</sub> | Os019787_01 | S4 | 0.000  | 2.023  | P | 822.405  | P | 685.078  | P | 168.524  | LOC_Os05g33100.1 |
| DG <sub>HP</sub> | Os019923_01 | S4 | -1.312 | 0.000  | P | 386.814  | P | 155.743  | P | 292.445  | LOC_Os01g51890.1 |
| DG <sub>HP</sub> | Os019947_01 | S4 | 0.000  | 1.551  | P | 364.197  | P | 255.620  | P | 87.252   | LOC_Os11g12050.2 |
| DG <sub>HP</sub> | Os020041_01 | S4 | 0.000  | 1.421  | P | 210.486  | P | 299.230  | P | 111.774  | LOC_Os01g64010.2 |
| DG <sub>HP</sub> | Os020206_01 | S4 | 0.000  | 1.483  | P | 242.880  | P | 298.670  | P | 106.828  | LOC_Os03g63500.1 |
| DG <sub>HP</sub> | Os020291_01 | S4 | 0.000  | -1.405 | P | 815.152  | P | 746.315  | P | 1975.693 | LOC_Os09g24640.1 |
| DG <sub>HP</sub> | Os020301_01 | S4 | 0.000  | 1.445  | P | 306.641  | P | 326.159  | P | 119.774  | LOC_Os06g40370.1 |
| DG <sub>HP</sub> | Os020308_01 | S4 | 1.985  | 0.000  | P | 143.853  | P | 569.388  | P | 331.633  | LOC_Os02g48840.1 |
| DG <sub>HP</sub> | Os020318_01 | S4 | 1.449  | 0.000  | P | 183.327  | P | 500.420  | P | 638.566  | LOC_Os07g14160.3 |
| DG <sub>HP</sub> | Os020363_01 | S4 | 0.000  | -1.177 | P | 854.799  | P | 436.029  | P | 985.577  | LOC_Os02g21260.1 |
| DG <sub>HP</sub> | Os020383_01 | S4 | 1.522  | 0.000  | P | 131.478  | P | 377.686  | P | 204.794  | LOC_Os02g50320.1 |
| DG <sub>HP</sub> | Os020392_01 | S4 | 0.000  | 1.585  | P | 2922.037 | P | 6328.376 | P | 2108.836 | LOC_Os03g15050.2 |
| DG <sub>HP</sub> | Os020398_01 | S4 | 1.577  | 0.000  | P | 375.939  | P | 1121.695 | P | 1233.734 | LOC_Os03g54000.1 |
| DG <sub>HP</sub> | Os020411_01 | S4 | -1.379 | -1.884 | P | 3326.786 | P | 1279.020 | P | 4719.485 | LOC_Os08g39140.1 |
| DG <sub>HP</sub> | Os020450_01 | S4 | 0.000  | 1.769  | P | 653.615  | P | 560.854  | P | 164.506  | LOC_Os08g34950.1 |

|                  |             |    |        |        |   |          |   |          |   |          |                  |
|------------------|-------------|----|--------|--------|---|----------|---|----------|---|----------|------------------|
| DG <sub>HP</sub> | Os020479_01 | S4 | -1.090 | 0.000  | P | 510.458  | P | 239.727  | P | 178.450  | LOC_Os03g03280.1 |
| DG <sub>HP</sub> | Os020525_01 | S4 | -1.049 | 0.000  | P | 346.586  | P | 167.537  | P | 203.411  | -                |
| DG <sub>HP</sub> | Os020529_01 | S4 | -1.273 | 0.000  | P | 877.483  | P | 363.203  | P | 641.605  | LOC_Os01g57420.1 |
| DG <sub>HP</sub> | Os020541_01 | S4 | 0.000  | -1.279 | P | 331.133  | P | 200.233  | P | 486.031  | LOC_Os01g37842.1 |
| DG <sub>HP</sub> | Os020547_01 | S4 | 0.000  | -1.308 | P | 308.704  | P | 256.775  | P | 635.973  | LOC_Os03g10850.2 |
| DG <sub>HP</sub> | Os020576_01 | S4 | 1.613  | 0.000  | P | 202.768  | P | 620.327  | P | 1163.569 | LOC_Os03g56270.2 |
| DG <sub>HP</sub> | Os020623_01 | S4 | -1.866 | -1.799 | P | 4435.230 | P | 1216.686 | P | 4233.845 | LOC_Os07g49400.2 |
| DG <sub>HP</sub> | Os020828_01 | S4 | -1.063 | 0.000  | P | 375.785  | P | 179.882  | P | 255.453  | LOC_Os07g48280.2 |
| DG <sub>HP</sub> | Os020948_01 | S4 | 0.000  | 1.633  | P | 614.873  | P | 456.864  | P | 147.299  | LOC_Os04g46880.2 |
| DG <sub>HP</sub> | Os020972_01 | S4 | 0.000  | 1.513  | P | 294.069  | P | 342.281  | P | 119.900  | LOC_Os03g60150.2 |
| DG <sub>HP</sub> | Os021076_01 | S4 | 0.000  | 1.680  | P | 212.326  | P | 250.779  | P | 78.248   | LOC_Os01g03110.1 |
| DG <sub>HP</sub> | Os021148_01 | S4 | 0.000  | 1.422  | P | 205.678  | P | 225.703  | P | 84.259   | LOC_Os03g55270.1 |
| DG <sub>HP</sub> | Os021391_01 | S4 | 0.000  | -1.336 | P | 1953.787 | P | 1706.069 | P | 4307.824 | LOC_Os03g12670.2 |
| DG <sub>HP</sub> | Os021429_01 | S4 | 1.680  | 0.000  | P | 119.355  | P | 382.515  | P | 255.040  | LOC_Os12g20390.4 |
| DG <sub>HP</sub> | Os021555_01 | S4 | 0.000  | 1.641  | P | 474.283  | P | 366.419  | P | 117.456  | LOC_Os05g04530.1 |
| DG <sub>HP</sub> | Os021575_01 | S4 | 0.000  | 1.501  | P | 516.195  | P | 478.288  | P | 168.944  | LOC_Os02g28820.1 |
| DG <sub>HP</sub> | Os021682_01 | S4 | -1.070 | 0.000  | P | 332.830  | P | 158.536  | P | 179.465  | LOC_Os02g10380.1 |
| DG <sub>HP</sub> | Os021788_01 | S4 | 0.000  | 1.739  | P | 524.009  | P | 360.129  | P | 107.870  | LOC_Os07g10480.1 |
| DG <sub>HP</sub> | Os021870_01 | S4 | 0.000  | -1.285 | P | 312.520  | P | 626.661  | P | 1526.750 | LOC_Os07g41060.1 |
| DG <sub>HP</sub> | Os021893_01 | S4 | -1.684 | 0.000  | P | 862.866  | P | 268.502  | P | 581.146  | LOC_Os09g35030.1 |
| DG <sub>HP</sub> | Os021916_01 | S4 | 1.452  | 0.000  | P | 475.001  | P | 1299.834 | P | 510.025  | LOC_Os03g56950.4 |
| DG <sub>HP</sub> | Os022009_01 | S4 | -1.045 | 0.000  | P | 411.163  | P | 199.274  | P | 137.103  | LOC_Os09g35630.1 |
| DG <sub>HP</sub> | Os022024_01 | S4 | -1.151 | 0.000  | P | 1051.795 | P | 473.773  | P | 261.665  | LOC_Os02g03840.1 |
| DG <sub>HP</sub> | Os022090_01 | S4 | 1.802  | 0.000  | P | 79.130   | P | 275.904  | P | 275.554  | LOC_Os04g47250.1 |
| DG <sub>HP</sub> | Os022142_01 | S4 | -1.831 | 0.000  | P | 1887.977 | P | 530.528  | P | 717.915  | LOC_Os09g31200.1 |
| DG <sub>HP</sub> | Os022247_01 | S4 | -1.049 | 0.000  | P | 800.753  | P | 387.022  | P | 456.444  | LOC_Os03g26910.1 |
| DG <sub>HP</sub> | Os022291_01 | S4 | -1.708 | -1.170 | P | 2410.155 | P | 737.822  | P | 1660.655 | LOC_Os03g16880.1 |
| DG <sub>HP</sub> | Os022390_01 | S4 | 1.580  | 0.000  | P | 137.088  | P | 409.938  | P | 352.182  | -                |
| DG <sub>HP</sub> | Os022442_01 | S4 | 2.622  | 0.000  | P | 126.988  | P | 781.851  | P | 1018.231 | -                |
| DG <sub>HP</sub> | Os022597_01 | S4 | 1.757  | 0.000  | P | 551.597  | P | 1864.589 | P | 936.143  | LOC_Os11g17930.1 |
| DG <sub>HP</sub> | Os023251_01 | S4 | 3.301  | 0.000  | P | 130.423  | P | 1285.709 | P | 736.444  | -                |

|                  |             |    |        |        |   |           |   |           |   |          |                  |
|------------------|-------------|----|--------|--------|---|-----------|---|-----------|---|----------|------------------|
| DG <sub>HP</sub> | Os023424_01 | S4 | 1.585  | 10.000 | P | 100.082   | P | 300.263   | A | 45.440   | -                |
| DG <sub>HP</sub> | Os023709_01 | S4 | -1.062 | 0.000  | P | 469.030   | P | 224.719   | P | 232.337  | -                |
| DG <sub>HP</sub> | Os023935_01 | S4 | 0.000  | 1.538  | P | 1299.618  | P | 1101.919  | P | 379.552  | -                |
| DG <sub>HP</sub> | Os023944_01 | S4 | 1.705  | 0.000  | P | 103.274   | P | 336.635   | P | 165.323  | LOC_Os09g28650.1 |
| DG <sub>HP</sub> | Os023968_01 | S4 | 1.631  | 1.727  | P | 122.568   | P | 379.678   | P | 114.725  | LOC_Os06g34730.1 |
| DG <sub>HP</sub> | Os023998_01 | S4 | 0.000  | 1.435  | P | 948.499   | P | 979.145   | P | 362.185  | LOC_Os08g42570.1 |
| DG <sub>HP</sub> | Os024073_01 | S4 | 0.000  | 2.478  | P | 694.039   | P | 778.085   | P | 139.627  | -                |
| DG <sub>HP</sub> | Os024099_01 | S4 | -1.286 | 0.000  | P | 479.203   | P | 196.536   | P | 307.271  | LOC_Os01g51690.1 |
| DG <sub>HP</sub> | Os024100_01 | S4 | 0.000  | -1.513 | P | 251.651   | P | 418.044   | P | 1193.111 | LOC_Os05g03750.1 |
| DG <sub>HP</sub> | Os024213_01 | S4 | 0.000  | 1.589  | P | 803.433   | P | 806.136   | P | 267.891  | LOC_Os12g36930.1 |
| DG <sub>HP</sub> | Os024340_01 | S4 | 0.000  | -1.300 | P | 541.938   | P | 560.600   | P | 1380.489 | LOC_Os02g48380.1 |
| DG <sub>HP</sub> | Os024561_01 | S4 | 0.000  | -2.181 | P | 952.276   | P | 497.943   | P | 2257.630 | LOC_Os04g01740.1 |
| DG <sub>HP</sub> | Os024737_01 | S4 | 0.000  | 1.642  | P | 220.659   | P | 374.177   | P | 119.928  | LOC_Os01g01660.1 |
| DG <sub>HP</sub> | Os024767_01 | S4 | 1.622  | 0.000  | P | 329.992   | P | 1015.879  | P | 655.361  | LOC_Os03g59360.1 |
| DG <sub>HP</sub> | Os024882_01 | S4 | -1.104 | 0.000  | P | 786.453   | P | 365.935   | P | 410.671  | LOC_Os09g31120.1 |
| DG <sub>HP</sub> | Os025022_01 | S4 | 1.554  | 0.000  | P | 78.598    | P | 230.865   | P | 175.788  | LOC_Os04g41700.4 |
| DG <sub>HP</sub> | Os025567_01 | S4 | 0.000  | 1.424  | P | 361.001   | P | 591.951   | P | 220.665  | LOC_Os11g28270.3 |
| DG <sub>HP</sub> | Os025691_01 | S4 | 0.000  | 1.430  | P | 215.576   | P | 367.939   | P | 136.540  | LOC_Os11g38790.2 |
| DG <sub>HP</sub> | Os025757_01 | S4 | 1.593  | 0.000  | P | 101.769   | P | 307.077   | P | 299.671  | LOC_Os05g33390.1 |
| DG <sub>HP</sub> | Os025787_01 | S4 | 0.000  | 4.119  | P | 23473.327 | P | 21224.196 | P | 1221.412 | LOC_Os12g04980.1 |
| DG <sub>HP</sub> | Os025872_01 | S4 | 0.000  | 1.548  | P | 873.453   | P | 1055.401  | P | 360.828  | LOC_Os11g01450.1 |
| DG <sub>HP</sub> | Os026025_01 | S4 | 0.000  | 1.668  | P | 1026.865  | P | 695.380   | P | 218.847  | LOC_Os02g02930.1 |
| DG <sub>HP</sub> | Os026150_01 | S4 | 2.236  | 0.000  | P | 273.431   | P | 1288.337  | P | 1886.239 | LOC_Os01g07620.1 |
| DG <sub>HP</sub> | Os026289_01 | S4 | 0.000  | -1.172 | P | 175.166   | P | 168.843   | P | 380.322  | -                |
| DG <sub>HP</sub> | Os026463_01 | S4 | 0.000  | 1.725  | P | 230.567   | P | 282.160   | P | 85.346   | LOC_Os03g06000.1 |
| DG <sub>HP</sub> | Os026917_01 | S4 | -2.279 | 0.000  | P | 8111.820  | P | 1671.559  | P | 2616.135 | LOC_Os04g52250.1 |
| DG <sub>HP</sub> | Os027884_01 | S4 | 0.000  | 1.416  | P | 516.374   | P | 524.637   | P | 196.557  | LOC_Os04g49600.1 |
| DG <sub>HP</sub> | Os028023_01 | S4 | 0.000  | -1.150 | P | 390.255   | P | 338.238   | P | 750.553  | LOC_Os01g04630.1 |
| DG <sub>HP</sub> | Os028605_01 | S4 | -2.693 | 0.000  | P | 1847.279  | P | 285.586   | P | 531.154  | LOC_Os02g06380.1 |
| DG <sub>HP</sub> | Os028650_01 | S4 | 0.000  | 1.574  | P | 175.833   | P | 358.965   | P | 120.572  | LOC_Os01g10970.1 |
| DG <sub>HP</sub> | Os028680_01 | S4 | 2.516  | 0.000  | P | 176.619   | P | 1010.529  | P | 1334.953 | LOC_Os07g06100.1 |

|                  |             |    |        |        |   |          |   |           |   |           |                  |
|------------------|-------------|----|--------|--------|---|----------|---|-----------|---|-----------|------------------|
| DG <sub>HP</sub> | Os028716_01 | S4 | 0.000  | 2.819  | P | 654.475  | P | 554.809   | P | 78.628    | LOC_Os02g07320.1 |
| DG <sub>HP</sub> | Os029341_01 | S4 | 0.000  | -1.723 | P | 170.720  | P | 154.771   | P | 511.076   | LOC_Os01g68780.1 |
| DG <sub>HP</sub> | Os029713_01 | S4 | -1.069 | 0.000  | P | 8561.171 | P | 4079.924  | P | 1944.936  | LOC_Os07g30990.1 |
| DG <sub>HP</sub> | Os029818_01 | S4 | 0.000  | -1.312 | P | 280.163  | P | 175.631   | P | 436.010   | LOC_Os01g45940.1 |
| DG <sub>HP</sub> | Os029823_01 | S4 | 0.000  | -1.260 | P | 974.871  | P | 925.464   | P | 2215.951  | -                |
| DG <sub>HP</sub> | Os029861_01 | S4 | 0.000  | -1.219 | P | 154.481  | P | 189.592   | P | 441.345   | LOC_Os04g11190.1 |
| DG <sub>HP</sub> | Os029900_01 | S4 | 0.000  | -1.736 | P | 241.954  | P | 258.609   | P | 861.352   | -                |
| DG <sub>HP</sub> | Os029917_01 | S4 | 0.000  | -1.223 | P | 237.743  | P | 243.813   | P | 569.239   | LOC_Os08g37590.1 |
| DG <sub>HP</sub> | Os029919_01 | S4 | 0.000  | -1.377 | P | 187.069  | P | 218.429   | P | 567.399   | LOC_Os11g41630.1 |
| DG <sub>HP</sub> | Os029941_01 | S4 | 0.000  | -1.560 | P | 296.143  | P | 173.409   | P | 511.251   | LOC_Os09g11030.1 |
| DG <sub>HP</sub> | Os029948_01 | S4 | 0.000  | -1.233 | P | 238.867  | P | 327.908   | P | 770.697   | LOC_Os10g08610.1 |
| DG <sub>HP</sub> | Os029961_01 | S4 | 0.000  | -1.815 | P | 226.949  | P | 171.516   | P | 603.354   | LOC_Os01g62280.1 |
| DG <sub>HP</sub> | Os030032_01 | S4 | 1.460  | 0.000  | P | 117.719  | P | 323.840   | P | 555.294   | LOC_Os06g48560.1 |
| DG <sub>HP</sub> | Os030080_01 | S4 | -1.189 | 0.000  | P | 752.900  | P | 330.269   | P | 554.948   | LOC_Os03g45450.1 |
| DG <sub>HP</sub> | Os030155_01 | S4 | 0.000  | -3.924 | P | 165.288  | P | 334.314   | P | 5074.039  | LOC_Os02g14080.1 |
| DG <sub>HP</sub> | Os030295_01 | S4 | 2.477  | 0.000  | P | 2246.705 | P | 12508.171 | P | 24811.688 | LOC_Os12g08150.1 |
| DG <sub>HP</sub> | Os030571_01 | S4 | 0.000  | -1.799 | P | 245.808  | P | 199.757   | P | 695.318   | LOC_Os08g43880.1 |
| DG <sub>HP</sub> | Os030593_01 | S4 | 0.000  | -1.189 | P | 186.616  | P | 207.294   | P | 472.521   | LOC_Os03g50760.1 |
| DG <sub>HP</sub> | Os030630_01 | S4 | 0.000  | -1.639 | P | 144.045  | P | 207.942   | P | 647.831   | LOC_Os03g26470.1 |
| DG <sub>HP</sub> | Os030714_01 | S4 | 0.000  | -1.544 | P | 158.475  | P | 156.536   | P | 456.538   | LOC_Os01g43510.1 |
| DG <sub>HP</sub> | Os030892_01 | S4 | 0.000  | -1.152 | P | 226.179  | P | 200.046   | P | 444.410   | LOC_Os02g41930.1 |
| DG <sub>HP</sub> | Os030944_01 | S4 | 0.000  | 1.586  | P | 527.936  | P | 580.215   | P | 193.230   | LOC_Os02g19790.1 |
| DG <sub>HP</sub> | Os030993_01 | S4 | 0.000  | -2.379 | P | 338.510  | P | 361.250   | P | 1879.004  | -                |
| DG <sub>HP</sub> | Os031060_01 | S4 | 0.000  | 1.445  | P | 150.824  | P | 259.595   | P | 95.332    | -                |
| DG <sub>HP</sub> | Os031100_01 | S4 | 0.000  | -1.490 | P | 167.047  | P | 159.558   | P | 448.201   | LOC_Os11g31140.1 |
| DG <sub>HP</sub> | Os031550_01 | S4 | 0.000  | -1.373 | P | 359.340  | P | 360.715   | P | 934.493   | LOC_Os04g10924.1 |
| DG <sub>HP</sub> | Os031740_01 | S4 | 0.000  | 1.933  | P | 832.534  | P | 513.149   | P | 134.399   | LOC_Os07g05890.1 |
| DG <sub>HP</sub> | Os031745_01 | S4 | 1.815  | 0.000  | P | 3188.687 | P | 11221.626 | P | 19808.633 | -                |
| DG <sub>HP</sub> | Os031754_01 | S4 | 0.000  | 1.452  | P | 235.379  | P | 263.663   | P | 96.400    | LOC_Os08g31070.1 |
| DG <sub>HP</sub> | Os031779_01 | S4 | -1.098 | 0.000  | P | 384.134  | P | 179.450   | P | 128.784   | -                |
| DG <sub>HP</sub> | Os032085_01 | S4 | 0.000  | -1.933 | P | 145.794  | P | 185.783   | P | 709.633   | LOC_Os06g10980.1 |



|                  |             |    |        |        |   |          |   |           |   |           |                  |
|------------------|-------------|----|--------|--------|---|----------|---|-----------|---|-----------|------------------|
| DG <sub>HP</sub> | Os032441_01 | S4 | 0.000  | -1.755 | P | 190.922  | P | 314.971   | P | 1062.853  | LOC_Os03g29470.1 |
| DG <sub>HP</sub> | Os032459_01 | S4 | 0.000  | -1.649 | P | 96.981   | P | 178.984   | P | 561.184   | LOC_Os02g44560.1 |
| DG <sub>HP</sub> | Os032489_01 | S4 | 0.000  | -4.401 | P | 127.711  | P | 276.961   | P | 5849.591  | LOC_Os06g38080.1 |
| DG <sub>HP</sub> | Os032845_01 | S4 | 0.000  | -1.218 | P | 539.441  | P | 407.087   | P | 947.279   | LOC_Os02g56260.1 |
| DG <sub>HP</sub> | Os032846_01 | S4 | 0.000  | -1.943 | P | 270.014  | P | 234.601   | P | 902.263   | LOC_Os08g33600.1 |
| DG <sub>HP</sub> | Os032854_01 | S4 | 0.000  | -1.276 | P | 290.027  | P | 227.247   | P | 550.432   | LOC_Os09g25080.1 |
| DG <sub>HP</sub> | Os032863_01 | S4 | 0.000  | -1.507 | P | 234.089  | P | 285.075   | P | 810.266   | -                |
| DG <sub>HP</sub> | Os032876_01 | S4 | 0.000  | -1.165 | P | 198.445  | P | 197.213   | P | 442.203   | LOC_Os12g32160.1 |
| DG <sub>HP</sub> | Os032927_01 | S4 | 0.000  | 1.462  | P | 286.447  | P | 326.324   | P | 118.443   | LOC_Os01g03380.1 |
| DG <sub>HP</sub> | Os032935_01 | S4 | 0.000  | -1.298 | P | 226.584  | P | 170.789   | P | 419.936   | LOC_Os06g45920.1 |
| DG <sub>HP</sub> | Os033054_01 | S4 | 0.000  | -1.908 | P | 162.008  | P | 160.838   | P | 603.510   | -                |
| DG <sub>HP</sub> | Os033126_01 | S4 | 0.000  | -1.285 | P | 318.440  | P | 255.807   | P | 623.336   | -                |
| DG <sub>HP</sub> | Os033134_01 | S4 | 0.000  | -1.244 | P | 240.422  | P | 169.644   | P | 401.912   | LOC_Os07g22360.1 |
| DG <sub>HP</sub> | Os033145_01 | S4 | -1.332 | 0.000  | P | 721.813  | P | 286.766   | P | 599.974   | LOC_Os01g49880.1 |
| DG <sub>HP</sub> | Os033147_01 | S4 | 0.000  | -1.446 | P | 199.518  | P | 172.952   | P | 471.285   | LOC_Os04g10370.1 |
| DG <sub>HP</sub> | Os033148_01 | S4 | 0.000  | -1.640 | P | 462.270  | P | 332.732   | P | 1036.760  | LOC_Os08g32550.1 |
| DG <sub>HP</sub> | Os033149_01 | S4 | 0.000  | -1.849 | P | 232.757  | P | 199.098   | P | 717.015   | LOC_Os08g32560.1 |
| DG <sub>HP</sub> | Os033172_01 | S4 | 0.000  | -2.157 | P | 236.986  | P | 250.108   | P | 1115.154  | LOC_Os03g31790.1 |
| DG <sub>HP</sub> | Os033599_01 | S4 | 0.000  | -1.240 | P | 349.570  | P | 459.609   | P | 1085.525  | LOC_Os12g04710.1 |
| DG <sub>HP</sub> | Os033675_01 | S4 | 0.000  | -1.183 | P | 205.510  | P | 195.781   | P | 444.440   | LOC_Os08g39000.1 |
| DG <sub>HP</sub> | Os033950_01 | S4 | 0.000  | 1.496  | P | 455.606  | P | 428.803   | P | 152.002   | -                |
| DG <sub>HP</sub> | Os034051_01 | S4 | 0.000  | -1.376 | P | 171.639  | P | 183.824   | P | 476.980   | LOC_Os05g25670.1 |
| DG <sub>HP</sub> | Os034271_01 | S4 | 0.000  | 1.475  | P | 657.648  | P | 489.161   | P | 175.951   | LOC_Os09g09230.1 |
| DG <sub>HP</sub> | Os034759_01 | S4 | 0.000  | 2.490  | P | 6599.000 | P | 3807.500  | P | 677.710   | LOC_Os04g13090.1 |
| DG <sub>HP</sub> | Os035262_01 | S4 | 0.000  | -1.706 | P | 118.700  | P | 202.874   | P | 662.105   | LOC_Os05g32060.1 |
| DG <sub>HP</sub> | Os035714_01 | S4 | 0.000  | 1.446  | P | 144.343  | P | 288.155   | P | 105.770   | LOC_Os04g02970.1 |
| DG <sub>HP</sub> | Os035879_01 | S4 | 0.000  | -1.253 | P | 183.829  | P | 188.976   | P | 450.502   | -                |
| DG <sub>HP</sub> | Os036341_01 | S4 | 0.000  | 1.555  | P | 389.146  | P | 345.307   | P | 117.537   | LOC_Os07g05510.1 |
| DG <sub>HP</sub> | Os036618_01 | S4 | 1.544  | 0.000  | P | 6494.155 | P | 18937.344 | P | 15423.703 | LOC_Os04g33830.1 |
| DG <sub>HP</sub> | Os037234_01 | S4 | 0.000  | 2.476  | P | 1080.291 | P | 836.987   | P | 150.453   | LOC_Os07g11440.1 |
| DG <sub>HP</sub> | Os037264_01 | S4 | -1.082 | 0.000  | P | 882.589  | P | 416.789   | P | 513.619   | LOC_Os01g11620.1 |

|                  |             |    |        |        |   |          |   |           |   |           |                  |
|------------------|-------------|----|--------|--------|---|----------|---|-----------|---|-----------|------------------|
| DG <sub>HP</sub> | Os037569_01 | S4 | 0.000  | 1.481  | P | 327.076  | P | 359.670   | P | 128.839   | LOC_Os01g18710.1 |
| DG <sub>HP</sub> | Os037594_01 | S4 | -1.481 | -1.448 | P | 2160.760 | P | 774.182   | P | 2112.860  | -                |
| DG <sub>HP</sub> | Os037667_01 | S4 | -1.425 | 0.000  | P | 621.076  | P | 231.320   | P | 312.398   | LOC_Os10g26380.1 |
| DG <sub>HP</sub> | Os037668_01 | S4 | 1.712  | 0.000  | P | 2940.253 | P | 9635.683  | P | 17165.011 | LOC_Os04g40120.1 |
| DG <sub>HP</sub> | Os037793_01 | S4 | 0.000  | 1.435  | P | 319.695  | P | 307.507   | P | 113.742   | LOC_Os03g17130.1 |
| DG <sub>HP</sub> | Os038136_01 | S4 | 1.505  | 0.000  | P | 184.758  | P | 524.222   | P | 572.311   | LOC_Os08g14990.1 |
| DG <sub>HP</sub> | Os038269_01 | S4 | -1.868 | 10.000 | P | 721.451  | P | 197.680   | A | 27.593    | LOC_Os05g16980.1 |
| DG <sub>HP</sub> | Os038303_01 | S4 | 1.458  | 0.000  | P | 122.015  | P | 335.198   | P | 253.733   | LOC_Os03g62270.1 |
| DG <sub>HP</sub> | Os038923_01 | S4 | 0.000  | 1.661  | P | 357.685  | P | 315.860   | P | 99.908    | LOC_Os11g05830.1 |
| DG <sub>HP</sub> | Os039479_01 | S4 | 0.000  | 2.014  | P | 210.393  | P | 288.137   | P | 71.346    | LOC_Os05g02140.1 |
| DG <sub>HP</sub> | Os039580_01 | S4 | 0.000  | 1.796  | P | 1759.927 | P | 945.870   | P | 272.475   | LOC_Os02g40180.1 |
| DG <sub>HP</sub> | Os039707_01 | S4 | 1.780  | 0.000  | P | 139.641  | P | 479.485   | P | 559.973   | -                |
| DG <sub>HP</sub> | Os039819_01 | S4 | -1.294 | 0.000  | P | 793.478  | P | 323.630   | P | 193.561   | LOC_Os12g40260.1 |
| DG <sub>HP</sub> | Os039978_01 | S4 | 0.000  | 1.660  | P | 502.972  | P | 528.769   | P | 167.323   | -                |
| DG <sub>HP</sub> | Os040011_01 | S4 | 0.000  | 2.177  | P | 319.851  | P | 342.186   | P | 75.688    | LOC_Os04g07930.1 |
| DG <sub>HP</sub> | Os040237_01 | S4 | 0.000  | 1.431  | P | 290.996  | P | 280.062   | P | 103.902   | LOC_Os02g22770.1 |
| DG <sub>HP</sub> | Os040328_01 | S4 | 1.664  | 0.000  | P | 125.124  | P | 396.470   | P | 368.672   | LOC_Os05g31400.1 |
| DG <sub>HP</sub> | Os040491_01 | S4 | -1.094 | 0.000  | P | 2751.170 | P | 1288.945  | P | 1013.686  | LOC_Os01g52910.1 |
| DG <sub>HP</sub> | Os040604_01 | S4 | 0.000  | 1.447  | P | 151.499  | P | 218.116   | P | 80.013    | LOC_Os04g27820.1 |
| DG <sub>HP</sub> | Os040796_01 | S4 | 0.000  | -1.839 | P | 147.932  | P | 161.152   | P | 576.508   | LOC_Os04g55400.1 |
| DG <sub>HP</sub> | Os040811_01 | S4 | 1.475  | 0.000  | P | 146.361  | P | 407.000   | P | 434.683   | LOC_Os12g03500.1 |
| DG <sub>HP</sub> | Os041146_01 | S4 | -1.284 | 10.000 | P | 1455.716 | P | 597.844   | A | 77.240    | -                |
| DG <sub>HP</sub> | Os041269_01 | S4 | 2.069  | 0.000  | P | 112.040  | P | 469.960   | P | 800.391   | LOC_Os10g01500.1 |
| DG <sub>HP</sub> | Os041507_01 | S4 | 1.430  | 0.000  | P | 661.399  | P | 1781.578  | P | 1244.270  | -                |
| DG <sub>HP</sub> | Os041571_01 | S4 | 0.000  | 1.502  | P | 258.374  | P | 594.782   | P | 210.062   | LOC_Os07g02870.1 |
| DG <sub>HP</sub> | Os041663_01 | S4 | 1.444  | 0.000  | P | 204.716  | P | 557.160   | P | 379.618   | LOC_Os01g70080.1 |
| DG <sub>HP</sub> | Os041845_01 | S4 | 1.616  | 0.000  | P | 102.517  | P | 314.321   | P | 460.383   | LOC_Os02g29540.1 |
| DG <sub>HP</sub> | Os042004_01 | S4 | 0.000  | 1.532  | P | 424.140  | P | 444.127   | P | 153.571   | LOC_Os06g14640.1 |
| DG <sub>HP</sub> | Os042013_01 | S4 | 2.161  | -1.159 | P | 4661.550 | P | 20841.968 | P | 46528.396 | LOC_Os08g19330.1 |
| DG <sub>HP</sub> | Os042186_01 | S4 | 0.000  | 1.642  | P | 251.970  | P | 423.398   | P | 135.637   | LOC_Os04g43030.1 |
| DG <sub>HP</sub> | Os042203_01 | S4 | 1.687  | 1.519  | P | 112.355  | P | 361.646   | P | 126.191   | -                |

|                  |             |    |        |        |   |           |   |           |   |           |                  |
|------------------|-------------|----|--------|--------|---|-----------|---|-----------|---|-----------|------------------|
| DG <sub>HP</sub> | Os042254_01 | S4 | -1.189 | 0.000  | P | 1697.654  | P | 744.545   | P | 1417.752  | LOC_Os02g26380.1 |
| DG <sub>HP</sub> | Os042854_01 | S4 | 0.000  | -1.317 | P | 7454.280  | P | 5041.625  | P | 12562.052 | LOC_Os04g26880.1 |
| DG <sub>HP</sub> | Os043003_01 | S4 | 1.471  | 0.000  | P | 123.472   | P | 342.354   | P | 307.457   | LOC_Os05g31190.1 |
| DG <sub>HP</sub> | Os043072_01 | S4 | 0.000  | 1.499  | P | 183.670   | P | 221.188   | P | 78.279    | -                |
| DG <sub>HP</sub> | Os043100_01 | S4 | 1.441  | 0.000  | P | 248.410   | P | 674.604   | P | 419.015   | LOC_Os08g37070.1 |
| DG <sub>HP</sub> | Os043332_01 | S4 | -1.112 | 0.000  | P | 1377.243  | P | 637.174   | P | 571.848   | LOC_Os01g07800.1 |
| DG <sub>HP</sub> | Os043356_01 | S4 | 1.641  | 10.000 | P | 100.832   | P | 314.556   | A | 37.952    | LOC_Os04g50930.1 |
| DG <sub>HP</sub> | Os043463_01 | S4 | 0.000  | 1.413  | P | 138.733   | P | 257.282   | P | 96.627    | LOC_Os05g09280.1 |
| DG <sub>HP</sub> | Os043507_01 | S4 | 0.000  | -1.383 | P | 459.293   | P | 504.832   | P | 1316.366  | LOC_Os10g21040.1 |
| DG <sub>HP</sub> | Os043570_01 | S4 | 1.762  | 10.000 | P | 96.773    | P | 328.307   | A | 0.387     | LOC_Os05g43100.1 |
| DG <sub>HP</sub> | Os043715_01 | S4 | 1.975  | 0.000  | P | 101.660   | P | 399.695   | P | 529.770   | LOC_Os10g39070.1 |
| DG <sub>HP</sub> | Os043803_01 | S4 | 0.000  | 1.922  | P | 649.536   | P | 698.264   | P | 184.283   | LOC_Os04g20280.1 |
| DG <sub>HP</sub> | Os044283_01 | S4 | 1.772  | 0.000  | P | 271.537   | P | 927.299   | P | 688.208   | -                |
| DG <sub>HP</sub> | Os044300_01 | S4 | -1.741 | 2.115  | P | 47812.906 | P | 14303.377 | P | 3301.022  | LOC_Os05g11320.1 |
| DG <sub>HP</sub> | Os044500_01 | S4 | 0.000  | 1.825  | P | 338.116   | P | 414.398   | P | 116.978   | LOC_Os05g02110.1 |
| DG <sub>HP</sub> | Os044617_01 | S4 | 2.064  | -1.248 | P | 1169.763  | P | 4889.638  | P | 11612.922 | -                |
| DG <sub>HP</sub> | Os044797_01 | S4 | 2.182  | 0.000  | P | 83.710    | P | 379.820   | P | 287.910   | LOC_Os09g19180.1 |
| DG <sub>HP</sub> | Os044961_01 | S4 | 0.000  | 1.980  | P | 294.821   | P | 429.862   | P | 108.991   | LOC_Os03g24880.1 |
| DG <sub>HP</sub> | Os045117_01 | S4 | 1.454  | 0.000  | P | 561.879   | P | 1539.465  | P | 2282.026  | LOC_Os06g06310.1 |
| DG <sub>HP</sub> | Os045207_01 | S4 | 1.538  | 0.000  | P | 990.916   | P | 2877.874  | P | 5077.840  | -                |
| DG <sub>HP</sub> | Os045312_01 | S4 | -1.107 | 0.000  | P | 502.527   | P | 233.327   | P | 288.264   | -                |
| DG <sub>HP</sub> | Os045347_01 | S4 | 1.943  | 0.000  | P | 306.513   | P | 1178.336  | P | 1494.422  | LOC_Os06g18120.1 |
| DG <sub>HP</sub> | Os045359_01 | S4 | 1.756  | 0.000  | P | 406.518   | P | 1372.924  | P | 2373.585  | LOC_Os06g09250.1 |
| DG <sub>HP</sub> | Os045474_01 | S4 | 0.000  | -1.416 | P | 546.221   | P | 311.324   | P | 830.984   | LOC_Os06g11610.1 |
| DG <sub>HP</sub> | Os045513_01 | S4 | -1.412 | 0.000  | P | 464.170   | P | 174.440   | P | 227.933   | LOC_Os04g36790.1 |
| DG <sub>HP</sub> | Os045565_01 | S4 | 2.614  | -1.186 | P | 265.063   | P | 1623.183  | P | 3693.918  | LOC_Os10g09630.1 |
| DG <sub>HP</sub> | Os045577_01 | S4 | 1.845  | 0.000  | P | 1138.655  | P | 4089.516  | P | 6179.461  | LOC_Os12g07990.1 |
| DG <sub>HP</sub> | Os045664_01 | S4 | 1.626  | 0.000  | P | 1376.601  | P | 4248.104  | P | 5699.891  | LOC_Os02g25890.1 |
| DG <sub>HP</sub> | Os045704_01 | S4 | -1.274 | 0.000  | P | 481.538   | P | 199.142   | P | 344.235   | LOC_Os08g04360.1 |
| DG <sub>HP</sub> | Os045733_01 | S4 | -1.086 | 0.000  | P | 347.134   | P | 163.535   | P | 192.757   | LOC_Os06g39810.1 |
| DG <sub>HP</sub> | Os045835_01 | S4 | 0.000  | -1.481 | P | 309.269   | P | 197.707   | P | 551.724   | LOC_Os12g32050.1 |

|                  |             |    |        |        |   |           |   |          |   |          |                  |
|------------------|-------------|----|--------|--------|---|-----------|---|----------|---|----------|------------------|
| DG <sub>HP</sub> | Os046324_01 | S4 | 0.000  | 1.433  | P | 204.365   | P | 295.977  | P | 109.632  | LOC_Os12g02420.2 |
| DG <sub>HP</sub> | Os046413_01 | S4 | 1.503  | 0.000  | P | 239.450   | P | 678.554  | P | 1012.207 | LOC_Os02g11990.1 |
| DG <sub>HP</sub> | Os046725_01 | S4 | -1.046 | 0.000  | P | 311.880   | P | 151.046  | P | 165.480  | LOC_Os10g20420.1 |
| DG <sub>HP</sub> | Os046869_01 | S4 | -1.121 | 0.000  | P | 355.513   | P | 163.423  | P | 231.526  | LOC_Os11g30250.1 |
| DG <sub>HP</sub> | Os046947_01 | S4 | -1.293 | 0.000  | P | 359.603   | P | 146.736  | P | 262.947  | -                |
| DG <sub>HP</sub> | Os047001_01 | S4 | -1.078 | 0.000  | P | 475.875   | P | 225.338  | P | 210.925  | LOC_Os03g13400.1 |
| DG <sub>HP</sub> | Os047219_01 | S4 | 0.000  | -1.226 | P | 345.737   | P | 352.366  | P | 824.196  | LOC_Os02g39170.1 |
| DG <sub>HP</sub> | Os047260_01 | S4 | -1.073 | 0.000  | P | 7293.100  | P | 3467.319 | P | 3490.072 | LOC_Os06g34840.1 |
| DG <sub>HP</sub> | Os047459_01 | S4 | 1.838  | 0.000  | P | 745.318   | P | 2664.496 | P | 4430.438 | LOC_Os01g12940.1 |
| DG <sub>HP</sub> | Os047560_01 | S4 | 0.000  | 1.538  | P | 1182.619  | P | 1336.583 | P | 460.155  | LOC_Os07g12890.1 |
| DG <sub>HP</sub> | Os047880_01 | S4 | 1.738  | 0.000  | P | 277.669   | P | 926.222  | P | 1227.911 | -                |
| DG <sub>HP</sub> | Os048336_01 | S4 | 0.000  | -1.232 | P | 193.581   | P | 269.195  | P | 632.513  | LOC_Os01g61490.1 |
| DG <sub>HP</sub> | Os048421_01 | S4 | -1.038 | 0.000  | P | 356.580   | P | 173.631  | P | 133.829  | LOC_Os04g47480.1 |
| DG <sub>HP</sub> | Os048704_01 | S4 | -1.428 | 0.000  | P | 539.005   | P | 200.337  | P | 206.000  | -                |
| DG <sub>HP</sub> | Os048713_01 | S4 | 0.000  | -1.224 | P | 534.776   | P | 825.742  | P | 1928.644 | LOC_Os11g27090.1 |
| DG <sub>HP</sub> | Os049013_01 | S4 | 1.655  | 0.000  | P | 112.071   | P | 352.880  | P | 385.869  | LOC_Os02g29170.1 |
| DG <sub>HP</sub> | Os049649_01 | S4 | 1.436  | 0.000  | P | 220.448   | P | 596.649  | P | 931.317  | -                |
| DG <sub>HP</sub> | Os051250_01 | S4 | 0.000  | 1.869  | P | 904.855   | P | 862.616  | P | 236.229  | -                |
| DG <sub>HP</sub> | Os051869_01 | S4 | 0.000  | -3.008 | P | 173.269   | P | 158.138  | P | 1272.576 | LOC_Os11g45090.1 |
| DG <sub>HP</sub> | Os051905_01 | S4 | -1.417 | 0.000  | P | 3726.059  | P | 1395.766 | P | 2454.747 | LOC_Os01g74450.1 |
| DG <sub>HP</sub> | Os051916_01 | S4 | 0.000  | 1.453  | P | 13385.812 | P | 9660.851 | P | 3529.827 | LOC_Os06g46770.2 |
| DG <sub>HP</sub> | Os051940_01 | S4 | 0.000  | 1.495  | P | 1567.469  | P | 1810.720 | P | 642.411  | LOC_Os10g39410.1 |
| DG <sub>HP</sub> | Os051959_01 | S4 | -1.148 | 0.000  | P | 15055.415 | P | 6792.165 | P | 4905.820 | LOC_Os02g02400.1 |
| DG <sub>HP</sub> | Os051981_01 | S4 | 0.000  | 1.608  | P | 3238.451  | P | 3139.995 | P | 1029.835 | LOC_Os11g47809.1 |
| DG <sub>HP</sub> | Os051997_01 | S4 | 1.838  | 0.000  | P | 114.323   | P | 408.733  | P | 171.092  | LOC_Os04g54280.1 |
| DG <sub>HP</sub> | Os052000_01 | S4 | -1.334 | 0.000  | P | 5244.337  | P | 2079.767 | P | 3184.090 | LOC_Os01g66120.1 |
| DG <sub>HP</sub> | Os052050_01 | S4 | -1.116 | 0.000  | P | 12053.435 | P | 5560.807 | P | 5502.655 | LOC_Os01g64960.1 |
| DG <sub>HP</sub> | Os052084_01 | S4 | 0.000  | 3.153  | P | 1661.197  | P | 896.892  | P | 100.825  | LOC_Os11g32650.1 |
| DG <sub>HP</sub> | Os052123_01 | S4 | 0.000  | 1.942  | P | 469.776   | P | 981.299  | P | 255.349  | LOC_Os06g04920.1 |
| DG <sub>HP</sub> | Os052145_01 | S4 | 0.000  | -1.500 | P | 260.263   | P | 155.936  | P | 440.960  | LOC_Os01g53730.1 |
| DG <sub>HP</sub> | Os052160_01 | S4 | -1.252 | 0.000  | P | 493.567   | P | 207.189  | P | 357.554  | LOC_Os01g58420.1 |

|                  |             |    |        |        |   |          |   |           |   |           |                  |
|------------------|-------------|----|--------|--------|---|----------|---|-----------|---|-----------|------------------|
| DG <sub>HP</sub> | Os052161_01 | S4 | 1.679  | 0.000  | P | 134.796  | P | 431.650   | P | 519.688   | LOC_Os02g02960.4 |
| DG <sub>HP</sub> | Os052234_01 | S4 | 0.000  | 1.815  | P | 1424.245 | P | 1158.667  | P | 329.260   | -                |
| DG <sub>HP</sub> | Os052269_01 | S4 | 0.000  | 1.746  | P | 213.475  | P | 334.802   | P | 99.844    | LOC_Os06g35530.1 |
| DG <sub>HP</sub> | Os052281_01 | S4 | 0.000  | -1.223 | P | 4058.469 | P | 4188.169  | P | 9779.753  | LOC_Os07g46460.1 |
| DG <sub>HP</sub> | Os052310_01 | S4 | 0.000  | 1.697  | P | 270.589  | P | 376.796   | P | 116.237   | LOC_Os08g43640.1 |
| DG <sub>HP</sub> | Os052323_01 | S4 | 1.576  | 0.000  | P | 201.698  | P | 601.448   | P | 535.003   | LOC_Os03g61260.2 |
| DG <sub>HP</sub> | Os052340_01 | S4 | 0.000  | 1.440  | P | 307.964  | P | 389.012   | P | 143.377   | LOC_Os07g04500.1 |
| DG <sub>HP</sub> | Os052473_01 | S4 | 0.000  | 1.443  | P | 503.660  | P | 507.904   | P | 186.756   | LOC_Os08g09240.2 |
| DG <sub>HP</sub> | Os052700_01 | S4 | -1.659 | 0.000  | P | 827.824  | P | 262.101   | P | 300.288   | LOC_Os06g13190.1 |
| DG <sub>HP</sub> | Os052724_01 | S4 | -1.139 | 0.000  | P | 585.420  | P | 265.853   | P | 180.296   | LOC_Os03g14910.1 |
| DG <sub>HP</sub> | Os052911_01 | S4 | 1.986  | 0.000  | P | 98.336   | P | 389.588   | P | 513.198   | LOC_Os08g04500.1 |
| DG <sub>HP</sub> | Os052943_01 | S4 | -1.053 | -1.646 | P | 361.034  | P | 174.056   | P | 544.774   | LOC_Os01g45570.1 |
| DG <sub>HP</sub> | Os053035_01 | S4 | 0.000  | 1.407  | P | 365.262  | P | 414.457   | P | 156.288   | -                |
| DG <sub>HP</sub> | Os053047_01 | S4 | 0.000  | 1.464  | P | 260.415  | P | 319.019   | P | 115.614   | LOC_Os07g47350.1 |
| DG <sub>HP</sub> | Os053372_01 | S4 | 0.000  | -1.782 | P | 87.639   | P | 177.205   | P | 609.355   | LOC_Os01g03500.1 |
| DG <sub>HP</sub> | Os053553_01 | S4 | -1.363 | 0.000  | P | 511.639  | P | 198.972   | P | 328.801   | LOC_Os01g54880.1 |
| DG <sub>HP</sub> | Os053631_01 | S4 | 1.429  | 0.000  | P | 96.715   | P | 260.413   | P | 188.185   | LOC_Os01g14890.1 |
| DG <sub>HP</sub> | Os053642_01 | S4 | 0.000  | 1.570  | P | 269.844  | P | 466.301   | P | 157.081   | LOC_Os01g67490.2 |
| DG <sub>HP</sub> | Os053857_01 | S4 | -1.276 | 0.000  | P | 827.735  | P | 341.898   | P | 432.478   | LOC_Os01g40070.1 |
| DG <sub>HP</sub> | Os053922_01 | S4 | -1.406 | 0.000  | P | 1496.732 | P | 564.937   | P | 624.394   | LOC_Os08g36500.1 |
| DG <sub>HP</sub> | Os053954_01 | S4 | -1.037 | 0.000  | P | 536.186  | P | 261.387   | P | 182.535   | -                |
| DG <sub>HP</sub> | Os054011_01 | S4 | 0.000  | -1.258 | P | 368.633  | P | 322.660   | P | 771.444   | LOC_Os01g03420.1 |
| DG <sub>HP</sub> | Os054316_01 | S4 | 1.662  | 0.000  | P | 98.029   | P | 310.152   | P | 201.876   | LOC_Os12g32360.1 |
| DG <sub>HP</sub> | Os054377_01 | S4 | 1.559  | 10.000 | P | 105.271  | P | 310.100   | A | 83.426    | LOC_Os05g31140.1 |
| DG <sub>HP</sub> | Os054482_01 | S4 | -1.391 | 0.000  | P | 3257.434 | P | 1242.006  | P | 1801.668  | LOC_Os05g49890.1 |
| DG <sub>HP</sub> | Os054491_01 | S4 | 1.589  | 0.000  | P | 311.942  | P | 938.283   | P | 1757.764  | -                |
| DG <sub>HP</sub> | Os054496_01 | S4 | -1.420 | 0.000  | P | 1373.624 | P | 513.345   | P | 889.670   | LOC_Os08g41390.2 |
| DG <sub>HP</sub> | Os054539_01 | S4 | 2.068  | 0.000  | P | 5393.622 | P | 22611.517 | P | 12846.402 | LOC_Os09g30340.1 |
| DG <sub>HP</sub> | Os054553_01 | S4 | -1.134 | 0.000  | P | 1166.944 | P | 531.782   | P | 599.779   | LOC_Os08g44340.1 |
| DG <sub>HP</sub> | Os054638_01 | S4 | -1.280 | -1.273 | P | 445.270  | P | 183.371   | P | 443.147   | -                |
| DG <sub>HP</sub> | Os054673_01 | S4 | -1.913 | -1.187 | P | 3324.826 | P | 882.667   | P | 2009.564  | LOC_Os03g55540.1 |

|                  |                     |        |                  |                  |   |                    |               |                    |               |          |                  |
|------------------|---------------------|--------|------------------|------------------|---|--------------------|---------------|--------------------|---------------|----------|------------------|
| DG <sub>HP</sub> | Os054682_01         | S4     | -1.389           | 0.000            | P | 808.446            | P             | 308.608            | P             | 341.367  | LOC_Os03g17700.1 |
| DG <sub>HP</sub> | Os054699_01         | S4     | 0.000            | 1.443            | P | 7260.443           | P             | 6897.873           | P             | 2537.490 | -                |
| DG <sub>HP</sub> | Os054741_01         | S4     | 2.208            | -1.477           | P | 177.272            | P             | 819.139            | P             | 2279.495 | -                |
| DG <sub>HP</sub> | Os054764_01         | S4     | 0.000            | 1.446            | P | 700.147            | P             | 750.031            | P             | 275.218  | LOC_Os04g01540.1 |
| DG <sub>HP</sub> | Os054785_01         | S4     | -3.121           | -2.439           | P | 1662.833           | P             | 191.130            | P             | 1036.574 | LOC_Os01g09220.1 |
| DG <sub>HP</sub> | Os054951_01         | S4     | -1.038           | 0.000            | P | 1003.375           | P             | 488.485            | P             | 586.550  | LOC_Os01g50700.1 |
| DG <sub>HP</sub> | Os054974_01         | S4     | -1.552           | 0.000            | P | 489.237            | P             | 166.798            | P             | 248.643  | -                |
| DG <sub>HP</sub> | Os055029_01         | S4     | -1.065           | 0.000            | P | 578.146            | P             | 276.385            | P             | 172.518  | LOC_Os01g14440.1 |
| DG <sub>HP</sub> | Os055108_01         | S4     | 1.732            | 0.000            | P | 96.413             | P             | 320.206            | P             | 292.759  | LOC_Os06g23430.2 |
| DG <sub>HP</sub> | Os055142_01         | S4     | -1.066           | 0.000            | P | 667.238            | P             | 318.810            | P             | 510.692  | LOC_Os04g58890.1 |
| DG <sub>HP</sub> | Os055148_01         | S4     | 1.555            | 0.000            | P | 753.553            | P             | 2213.462           | P             | 1356.321 | LOC_Os03g55030.1 |
| DG <sub>HP</sub> | Os055171_01         | S4     | -2.062           | 0.000            | P | 2318.477           | P             | 555.413            | P             | 937.648  | LOC_Os06g04230.1 |
| DG <sub>HP</sub> | Os055222_01         | S4     | 1.430            | 0.000            | P | 259.652            | P             | 699.799            | P             | 430.686  | LOC_Os01g59060.1 |
| DG <sub>HP</sub> | Os055237_01         | S4     | 0.000            | 1.556            | P | 200.722            | P             | 315.997            | P             | 107.449  | LOC_Os07g45570.1 |
| DG <sub>HP</sub> | Os055517_01         | S4     | -1.556           | 0.000            | P | 958.081            | P             | 325.753            | P             | 644.418  | LOC_Os02g10860.1 |
| DG <sub>HP</sub> | Os055644_01         | S4     | 0.000            | 1.412            | P | 2211.992           | P             | 1182.623           | P             | 444.442  | LOC_Os01g61400.1 |
| DG <sub>HP</sub> | Os055679_01         | S4     | 1.910            | 0.000            | P | 124.426            | P             | 467.558            | P             | 199.903  | LOC_Os01g12270.1 |
| DG <sub>HP</sub> | Os055739_02         | S4     | -1.529           | 0.000            | P | 1598.744           | P             | 553.990            | P             | 640.828  | -                |
| DG <sub>HP</sub> | Os056149_01         | S4     | 0.000            | -1.161           | P | 1482.428           | P             | 1839.015           | P             | 4112.828 | LOC_Os01g22249.1 |
| DG <sub>HP</sub> | Os056222_01         | S4     | -1.706           | 0.000            | P | 1561.296           | P             | 478.703            | P             | 539.060  | LOC_Os06g01580.1 |
| DG <sub>HP</sub> | Os056527_01         | S4     | 1.559            | 0.000            | P | 137.983            | P             | 406.439            | P             | 173.598  | -                |
| DG <sub>HP</sub> | Os056638_01         | S4     | 0.000            | -1.209           | P | 427.361            | P             | 253.988            | P             | 587.288  | -                |
| DG <sub>HP</sub> | Os056903_02         | S4     | 0.000            | -1.518           | P | 296.311            | P             | 199.233            | P             | 570.662  | LOC_Os01g59510.1 |
| DG <sub>HP</sub> | Os057614_02         | S4     | 1.572            | 0.000            | P | 317.493            | P             | 943.723            | P             | 605.481  | LOC_Os06g22060.1 |
| DG <sub>HP</sub> | Os057647_02         | S4     | 2.014            | -1.359           | P | 145.488            | P             | 587.464            | P             | 1507.323 | -                |
| DG <sub>HP</sub> | GeneID              | period | log2(Ratio(L/9)) | log2(Ratio(L/P)) |   | Fi.pncle_9311.flag | Fi.pncle_9311 | Fi.pncle_LYP9.flag | Fi.pncle_LYP9 |          |                  |
|                  | Fi.pncle_PA64s.flag |        | Fi.pncle_PA64s   | -                |   |                    |               |                    |               |          |                  |
| DG <sub>HP</sub> | Os000128_01         | S7     | 0.000            | -1.771           | P | 1285.015           | P             | 1244.609           | P             | 4248.274 | LOC_Os06g12740.1 |
| DG <sub>HP</sub> | Os000151_01         | S7     | 0.000            | -1.448           | P | 168.742            | P             | 210.424            | P             | 574.097  | LOC_Os10g41260.1 |
| DG <sub>HP</sub> | Os000174_01         | S7     | 0.749            | -1.522           | P | 285.199            | P             | 479.445            | P             | 1377.014 | LOC_Os04g17100.1 |
| DG <sub>HP</sub> | Os000187_01         | S7     | 0.824            | 0.000            | P | 2841.371           | P             | 5028.433           | P             | 2692.982 | LOC_Os03g63360.1 |

|                  |             |    |        |        |   |           |   |           |   |           |                  |
|------------------|-------------|----|--------|--------|---|-----------|---|-----------|---|-----------|------------------|
| DG <sub>HP</sub> | Os000205_01 | S7 | -1.013 | 0.000  | P | 907.306   | P | 449.457   | P | 231.751   | LOC_Os04g42860.1 |
| DG <sub>HP</sub> | Os000208_01 | S7 | -1.197 | 0.000  | P | 1219.405  | P | 532.046   | P | 380.437   | LOC_Os02g09150.1 |
| DG <sub>HP</sub> | Os000219_01 | S7 | 0.000  | 1.606  | P | 784.479   | P | 758.077   | P | 249.094   | LOC_Os09g36830.1 |
| DG <sub>HP</sub> | Os000237_01 | S7 | 0.955  | 1.641  | P | 1530.755  | P | 2967.486  | P | 951.167   | LOC_Os01g71190.1 |
| DG <sub>HP</sub> | Os000254_01 | S7 | -1.204 | -1.577 | P | 1446.448  | P | 627.798   | P | 1873.277  | -                |
| DG <sub>HP</sub> | Os000273_01 | S7 | 0.000  | 1.773  | P | 2014.882  | P | 1773.771  | P | 519.033   | LOC_Os04g48490.1 |
| DG <sub>HP</sub> | Os000277_01 | S7 | -0.774 | 0.000  | P | 309.044   | P | 180.698   | A | 92.809    | LOC_Os09g33450.1 |
| DG <sub>HP</sub> | Os000342_01 | S7 | -0.967 | 0.000  | P | 1286.412  | P | 657.881   | P | 422.973   | LOC_Os10g34180.2 |
| DG <sub>HP</sub> | Os000367_01 | S7 | -0.999 | 0.000  | P | 606.857   | P | 303.603   | P | 572.187   | LOC_Os06g01850.1 |
| DG <sub>HP</sub> | Os000386_01 | S7 | 0.000  | -1.753 | P | 259.690   | P | 310.364   | P | 1046.275  | LOC_Os06g08670.1 |
| DG <sub>HP</sub> | Os000403_01 | S7 | 0.000  | -1.879 | P | 225.449   | P | 277.639   | P | 1021.110  | LOC_Os12g08260.2 |
| DG <sub>HP</sub> | Os000416_01 | S7 | 0.000  | -1.538 | P | 302.537   | P | 234.585   | P | 681.090   | LOC_Os08g39450.1 |
| DG <sub>HP</sub> | Os000439_01 | S7 | -0.786 | 0.000  | P | 826.313   | P | 479.192   | P | 305.741   | LOC_Os02g57110.1 |
| DG <sub>HP</sub> | Os000442_01 | S7 | -1.271 | 0.000  | P | 1080.669  | P | 447.880   | P | 197.044   | LOC_Os03g01320.1 |
| DG <sub>HP</sub> | Os000481_01 | S7 | 0.000  | 1.807  | P | 1068.972  | P | 1309.457  | P | 374.306   | -                |
| DG <sub>HP</sub> | Os000533_01 | S7 | 0.000  | 1.656  | P | 1496.825  | P | 1282.926  | P | 406.989   | LOC_Os06g10760.1 |
| DG <sub>HP</sub> | Os000548_01 | S7 | 1.085  | 0.000  | P | 124.249   | P | 263.655   | P | 314.831   | LOC_Os07g09040.1 |
| DG <sub>HP</sub> | Os000616_01 | S7 | 0.788  | 0.000  | P | 12085.327 | P | 20874.019 | P | 11776.126 | LOC_Os05g34854.2 |
| DG <sub>HP</sub> | Os000743_01 | S7 | 0.000  | 1.621  | P | 1398.898  | P | 1017.784  | P | 330.887   | LOC_Os04g42580.1 |
| DG <sub>HP</sub> | Os000805_01 | S7 | -0.806 | 0.000  | P | 269.111   | P | 153.879   | A | 81.146    | LOC_Os09g20820.1 |
| DG <sub>HP</sub> | Os000842_01 | S7 | 0.000  | -1.746 | A | 85.181    | P | 283.486   | P | 950.685   | LOC_Os12g33130.1 |
| DG <sub>HP</sub> | Os001004_01 | S7 | 0.729  | 0.000  | P | 5185.630  | P | 8592.550  | P | 4982.624  | LOC_Os01g58310.1 |
| DG <sub>HP</sub> | Os001215_01 | S7 | -1.163 | 0.000  | P | 2977.952  | P | 1329.994  | P | 2350.544  | LOC_Os03g55450.2 |
| DG <sub>HP</sub> | Os001367_01 | S7 | 0.000  | 1.852  | P | 4107.665  | P | 4379.878  | P | 1213.111  | LOC_Os11g40590.3 |
| DG <sub>HP</sub> | Os001606_01 | S7 | 0.000  | -1.612 | P | 588.794   | P | 560.455   | P | 1712.922  | LOC_Os06g44450.1 |
| DG <sub>HP</sub> | Os001620_01 | S7 | 0.981  | 0.000  | P | 152.529   | P | 301.056   | P | 348.193   | LOC_Os07g16610.1 |
| DG <sub>HP</sub> | Os001651_01 | S7 | 0.000  | -1.414 | A | 93.194    | P | 141.372   | P | 376.737   | LOC_Os02g50640.1 |
| DG <sub>HP</sub> | Os001657_01 | S7 | 0.000  | -1.883 | P | 191.559   | P | 240.375   | P | 886.512   | LOC_Os07g48090.1 |
| DG <sub>HP</sub> | Os001666_01 | S7 | -0.845 | 0.000  | P | 333.414   | P | 185.552   | A | 79.221    | LOC_Os04g49680.1 |
| DG <sub>HP</sub> | Os001738_01 | S7 | -1.410 | 0.000  | P | 731.343   | P | 275.141   | P | 373.306   | LOC_Os02g41860.2 |
| DG <sub>HP</sub> | Os001786_01 | S7 | 0.000  | -1.961 | A | 101.315   | P | 137.138   | P | 534.057   | LOC_Os02g09980.1 |

|                  |             |    |        |        |   |          |   |          |   |           |                  |
|------------------|-------------|----|--------|--------|---|----------|---|----------|---|-----------|------------------|
| DG <sub>HP</sub> | Os001934_01 | S7 | 0.000  | -3.169 | A | 32.753   | P | 223.707  | P | 2012.557  | -                |
| DG <sub>HP</sub> | Os001936_01 | S7 | 0.000  | -2.057 | A | 187.543  | P | 522.065  | P | 2173.004  | LOC_Os06g30390.1 |
| DG <sub>HP</sub> | Os001958_01 | S7 | -0.978 | -1.960 | P | 872.823  | P | 443.067  | P | 1723.710  | LOC_Os02g37060.1 |
| DG <sub>HP</sub> | Os002063_01 | S7 | 0.902  | 0.000  | P | 162.381  | P | 303.448  | P | 205.793   | LOC_Os04g38360.1 |
| DG <sub>HP</sub> | Os002094_01 | S7 | -0.935 | -2.285 | P | 333.130  | P | 174.255  | P | 849.295   | LOC_Os12g36840.1 |
| DG <sub>HP</sub> | Os002104_02 | S7 | 0.000  | -1.486 | P | 177.375  | P | 140.321  | P | 393.153   | -                |
| DG <sub>HP</sub> | Os002138_01 | S7 | 0.000  | -1.437 | P | 432.997  | P | 587.907  | P | 1591.915  | -                |
| DG <sub>HP</sub> | Os002150_01 | S7 | 0.000  | -1.951 | P | 1163.173 | P | 968.803  | P | 3746.676  | LOC_Os03g30470.1 |
| DG <sub>HP</sub> | Os002197_01 | S7 | -1.216 | 0.000  | P | 1047.101 | P | 450.700  | A | 111.619   | LOC_Os01g63250.1 |
| DG <sub>HP</sub> | Os002390_01 | S7 | -0.872 | -2.708 | P | 1477.486 | P | 807.518  | P | 5276.541  | LOC_Os07g05360.1 |
| DG <sub>HP</sub> | Os002472_01 | S7 | 0.000  | -1.828 | P | 145.697  | P | 131.322  | P | 466.377   | LOC_Os06g17570.1 |
| DG <sub>HP</sub> | Os002678_01 | S7 | -1.304 | 0.000  | P | 741.529  | P | 300.393  | P | 486.546   | LOC_Os05g03920.1 |
| DG <sub>HP</sub> | Os002918_01 | S7 | 0.000  | -1.686 | P | 148.564  | P | 189.428  | P | 609.602   | LOC_Os05g38680.1 |
| DG <sub>HP</sub> | Os003371_01 | S7 | 0.000  | -1.473 | A | 150.424  | P | 340.337  | P | 944.861   | LOC_Os11g09970.1 |
| DG <sub>HP</sub> | Os004153_02 | S7 | 1.803  | 0.000  | P | 208.079  | P | 726.018  | P | 1231.754  | -                |
| DG <sub>HP</sub> | Os004239_02 | S7 | 0.842  | 0.000  | P | 2494.314 | P | 4470.328 | P | 1873.541  | -                |
| DG <sub>HP</sub> | Os004406_01 | S7 | 0.000  | -2.469 | P | 272.024  | P | 247.754  | P | 1372.030  | LOC_Os09g28390.1 |
| DG <sub>HP</sub> | Os005094_01 | S7 | 0.000  | -1.955 | P | 335.015  | P | 313.453  | P | 1214.933  | -                |
| DG <sub>HP</sub> | Os005478_01 | S7 | 0.000  | -1.580 | P | 438.114  | P | 654.943  | P | 1958.421  | LOC_Os08g45060.1 |
| DG <sub>HP</sub> | Os005879_01 | S7 | 0.000  | 1.603  | P | 499.508  | P | 462.485  | P | 152.267   | LOC_Os09g37610.1 |
| DG <sub>HP</sub> | Os005908_01 | S7 | 0.000  | 2.452  | P | 4786.331 | P | 3586.348 | P | 655.235   | LOC_Os07g45210.1 |
| DG <sub>HP</sub> | Os005941_01 | S7 | -0.881 | -1.525 | P | 4899.527 | P | 2661.314 | P | 7660.775  | LOC_Os09g31300.1 |
| DG <sub>HP</sub> | Os005944_01 | S7 | 0.000  | -1.650 | P | 4649.063 | P | 2816.973 | P | 8842.303  | LOC_Os04g51070.1 |
| DG <sub>HP</sub> | Os005953_01 | S7 | 0.000  | -1.831 | P | 6894.917 | P | 4086.208 | P | 14540.769 | LOC_Os06g30020.1 |
| DG <sub>HP</sub> | Os005956_01 | S7 | 0.000  | -1.577 | P | 3175.466 | P | 1968.680 | P | 5872.722  | LOC_Os03g18710.1 |
| DG <sub>HP</sub> | Os005967_01 | S7 | 0.000  | -1.447 | P | 5244.253 | P | 3405.615 | P | 9286.472  | LOC_Os07g08360.1 |
| DG <sub>HP</sub> | Os005968_01 | S7 | 0.000  | -1.432 | P | 1490.832 | P | 938.107  | P | 2531.824  | LOC_Os06g03750.1 |
| DG <sub>HP</sub> | Os006016_01 | S7 | 0.000  | -1.741 | P | 1449.582 | P | 1012.828 | P | 3384.467  | LOC_Os01g25386.1 |
| DG <sub>HP</sub> | Os006047_01 | S7 | 0.807  | 0.000  | P | 3138.534 | P | 5492.890 | P | 2607.688  | LOC_Os10g30600.2 |
| DG <sub>HP</sub> | Os006201_01 | S7 | 0.943  | 0.000  | P | 328.709  | P | 631.835  | P | 241.685   | LOC_Os03g09290.1 |
| DG <sub>HP</sub> | Os006414_01 | S7 | -0.791 | 1.827  | P | 3490.680 | P | 2017.392 | P | 568.777   | LOC_Os01g51020.1 |



|                  |             |    |        |        |   |           |   |           |   |           |                  |
|------------------|-------------|----|--------|--------|---|-----------|---|-----------|---|-----------|------------------|
| DG <sub>HP</sub> | Os006571_01 | S7 | 0.000  | -1.933 | P | 1872.397  | P | 1115.453  | P | 4259.027  | LOC_Os05g01350.1 |
| DG <sub>HP</sub> | Os006619_01 | S7 | 0.000  | 2.182  | P | 591.052   | P | 636.172   | P | 140.223   | LOC_Os06g44310.1 |
| DG <sub>HP</sub> | Os007263_01 | S7 | 0.000  | -1.607 | A | 72.747    | P | 205.702   | P | 626.573   | LOC_Os12g33150.1 |
| DG <sub>HP</sub> | Os007273_01 | S7 | -0.846 | 0.000  | P | 607.463   | P | 337.987   | P | 342.777   | LOC_Os03g05920.1 |
| DG <sub>HP</sub> | Os008399_01 | S7 | 0.000  | 3.246  | P | 2857.417  | P | 2114.532  | P | 222.915   | LOC_Os08g40930.1 |
| DG <sub>HP</sub> | Os008437_01 | S7 | 0.782  | 0.000  | P | 6608.431  | P | 11360.928 | P | 5427.503  | LOC_Os02g02410.1 |
| DG <sub>HP</sub> | Os008441_01 | S7 | 0.000  | 1.937  | P | 2287.317  | P | 3124.832  | P | 815.888   | LOC_Os03g49190.1 |
| DG <sub>HP</sub> | Os008529_01 | S7 | 1.314  | 0.000  | P | 412.438   | P | 1025.706  | P | 1663.889  | LOC_Os07g02210.2 |
| DG <sub>HP</sub> | Os008556_01 | S7 | -0.833 | -1.914 | P | 1293.375  | P | 726.247   | P | 2737.759  | LOC_Os02g44630.2 |
| DG <sub>HP</sub> | Os008617_01 | S7 | 0.000  | 1.553  | P | 1060.186  | P | 832.128   | P | 283.573   | LOC_Os07g33680.1 |
| DG <sub>HP</sub> | Os008633_01 | S7 | -1.141 | 0.000  | P | 757.999   | P | 343.649   | P | 222.670   | LOC_Os04g32560.2 |
| DG <sub>HP</sub> | Os008680_01 | S7 | 0.000  | 1.699  | P | 462.826   | P | 354.394   | P | 109.124   | LOC_Os02g18410.1 |
| DG <sub>HP</sub> | Os008681_01 | S7 | 0.000  | 1.577  | P | 416.436   | P | 335.047   | P | 112.263   | LOC_Os06g45000.2 |
| DG <sub>HP</sub> | Os008707_01 | S7 | 0.000  | 1.551  | P | 1814.761  | P | 1758.295  | P | 600.086   | LOC_Os03g13730.1 |
| DG <sub>HP</sub> | Os008737_01 | S7 | 0.000  | 1.613  | P | 1097.786  | P | 1213.528  | P | 396.695   | LOC_Os08g34190.1 |
| DG <sub>HP</sub> | Os008778_01 | S7 | -0.780 | 0.000  | P | 7913.996  | P | 4608.067  | P | 2457.547  | LOC_Os05g31000.1 |
| DG <sub>HP</sub> | Os008783_01 | S7 | 0.000  | 1.679  | P | 3803.112  | P | 2399.436  | P | 749.351   | LOC_Os01g16890.1 |
| DG <sub>HP</sub> | Os008822_01 | S7 | -0.829 | 0.000  | P | 7834.684  | P | 4411.278  | P | 3186.722  | LOC_Os03g41110.1 |
| DG <sub>HP</sub> | Os008842_01 | S7 | 0.000  | -1.831 | P | 405.530   | P | 373.109   | P | 1327.652  | LOC_Os11g39020.1 |
| DG <sub>HP</sub> | Os008855_01 | S7 | -1.427 | 0.000  | P | 2253.914  | P | 838.177   | P | 1128.025  | -                |
| DG <sub>HP</sub> | Os008905_01 | S7 | 0.000  | -1.377 | P | 1318.405  | P | 1389.046  | P | 3608.556  | LOC_Os06g37000.2 |
| DG <sub>HP</sub> | Os008912_01 | S7 | -0.962 | 0.000  | P | 688.528   | P | 353.441   | P | 295.547   | LOC_Os03g27230.1 |
| DG <sub>HP</sub> | Os008917_01 | S7 | -0.882 | 0.000  | P | 870.728   | P | 472.451   | P | 219.129   | LOC_Os05g22940.1 |
| DG <sub>HP</sub> | Os008947_01 | S7 | -1.983 | 0.000  | P | 5345.580  | P | 1351.780  | P | 612.866   | LOC_Os08g08980.1 |
| DG <sub>HP</sub> | Os008979_01 | S7 | 0.000  | -1.577 | P | 411.685   | P | 270.115   | P | 805.685   | LOC_Os01g17170.1 |
| DG <sub>HP</sub> | Os009002_01 | S7 | 1.072  | 0.000  | P | 8843.264  | P | 18591.217 | P | 10179.434 | LOC_Os05g42000.1 |
| DG <sub>HP</sub> | Os009120_01 | S7 | -1.423 | 0.000  | P | 6024.391  | P | 2246.459  | P | 1313.047  | LOC_Os08g13440.2 |
| DG <sub>HP</sub> | Os009124_01 | S7 | 0.000  | -1.820 | P | 17511.060 | P | 17881.057 | P | 63128.533 | LOC_Os12g02310.1 |
| DG <sub>HP</sub> | Os009127_01 | S7 | -1.021 | 0.000  | P | 453.756   | P | 223.535   | A | 74.261    | LOC_Os03g41675.1 |
| DG <sub>HP</sub> | Os009299_01 | S7 | 0.000  | 1.862  | P | 409.139   | P | 476.102   | P | 130.936   | LOC_Os06g39260.1 |
| DG <sub>HP</sub> | Os009300_01 | S7 | -0.886 | 0.000  | P | 1154.110  | P | 624.434   | P | 246.999   | LOC_Os07g30154.1 |

|                  |             |    |        |        |   |          |   |          |   |          |                  |
|------------------|-------------|----|--------|--------|---|----------|---|----------|---|----------|------------------|
| DG <sub>HP</sub> | Os009387_01 | S7 | 0.000  | 1.981  | P | 1835.114 | P | 1736.436 | P | 439.728  | LOC_Os07g42600.1 |
| DG <sub>HP</sub> | Os009416_01 | S7 | 0.000  | 1.636  | P | 731.548  | P | 612.978  | P | 197.283  | LOC_Os03g27010.1 |
| DG <sub>HP</sub> | Os009458_01 | S7 | 0.000  | 1.937  | P | 406.489  | P | 422.677  | P | 110.352  | LOC_Os08g06420.1 |
| DG <sub>HP</sub> | Os009562_01 | S7 | 0.000  | -2.411 | P | 283.426  | P | 270.415  | P | 1437.986 | LOC_Os03g22270.1 |
| DG <sub>HP</sub> | Os009610_01 | S7 | -0.830 | 0.000  | P | 268.269  | P | 150.919  | P | 138.475  | -                |
| DG <sub>HP</sub> | Os009688_01 | S7 | 1.200  | 0.000  | P | 132.963  | P | 305.474  | P | 308.182  | LOC_Os01g55650.1 |
| DG <sub>HP</sub> | Os009698_01 | S7 | 0.000  | 1.740  | P | 1967.651 | P | 2302.513 | P | 689.452  | -                |
| DG <sub>HP</sub> | Os009786_01 | S7 | -0.789 | 0.000  | P | 348.928  | P | 201.887  | P | 127.598  | LOC_Os03g24020.1 |
| DG <sub>HP</sub> | Os009788_01 | S7 | 0.000  | 1.489  | P | 423.867  | P | 445.627  | P | 158.799  | LOC_Os05g07040.1 |
| DG <sub>HP</sub> | Os009821_01 | S7 | 0.000  | -1.913 | P | 205.738  | P | 210.827  | P | 793.803  | LOC_Os03g46660.1 |
| DG <sub>HP</sub> | Os009835_01 | S7 | -0.838 | 0.000  | P | 959.743  | P | 536.945  | P | 1004.580 | LOC_Os12g36830.1 |
| DG <sub>HP</sub> | Os009844_01 | S7 | 0.000  | -1.414 | P | 302.703  | P | 243.487  | P | 648.947  | LOC_Os12g08730.1 |
| DG <sub>HP</sub> | Os009880_01 | S7 | 0.000  | 1.735  | P | 684.549  | P | 430.684  | P | 129.357  | LOC_Os05g08990.1 |
| DG <sub>HP</sub> | Os009883_01 | S7 | -1.100 | 0.000  | P | 2326.338 | P | 1085.259 | P | 2000.573 | LOC_Os02g51080.1 |
| DG <sub>HP</sub> | Os009887_01 | S7 | 0.000  | 2.096  | P | 1893.730 | P | 1776.716 | P | 415.685  | LOC_Os03g16440.1 |
| DG <sub>HP</sub> | Os009986_01 | S7 | 0.795  | -1.383 | P | 493.559  | P | 856.647  | P | 2234.047 | -                |
| DG <sub>HP</sub> | Os010088_01 | S7 | 0.000  | 1.515  | P | 3633.581 | P | 2310.419 | P | 808.317  | LOC_Os03g14530.1 |
| DG <sub>HP</sub> | Os010113_01 | S7 | 0.000  | -1.545 | P | 657.438  | P | 442.118  | P | 1289.692 | LOC_Os08g34210.1 |
| DG <sub>HP</sub> | Os010136_01 | S7 | 0.000  | 1.589  | P | 1162.622 | P | 809.595  | P | 269.170  | LOC_Os11g06730.1 |
| DG <sub>HP</sub> | Os010147_01 | S7 | -0.996 | 0.000  | P | 630.860  | P | 316.351  | P | 764.358  | LOC_Os12g43670.1 |
| DG <sub>HP</sub> | Os010219_01 | S7 | 1.343  | 0.000  | P | 210.075  | P | 532.747  | P | 454.034  | -                |
| DG <sub>HP</sub> | Os010230_01 | S7 | 0.000  | 1.505  | P | 623.957  | P | 542.157  | P | 191.061  | -                |
| DG <sub>HP</sub> | Os010257_01 | S7 | -0.833 | 0.000  | P | 917.765  | P | 515.253  | A | 66.061   | LOC_Os02g47130.1 |
| DG <sub>HP</sub> | Os010262_01 | S7 | 0.845  | 0.000  | P | 300.756  | P | 540.375  | P | 590.084  | LOC_Os07g45790.1 |
| DG <sub>HP</sub> | Os010444_01 | S7 | 0.000  | 1.815  | P | 641.147  | P | 427.603  | P | 121.554  | -                |
| DG <sub>HP</sub> | Os010471_01 | S7 | -0.773 | 0.000  | P | 1267.527 | P | 741.685  | P | 815.222  | -                |
| DG <sub>HP</sub> | Os010519_01 | S7 | 0.000  | 1.623  | P | 267.718  | P | 402.605  | P | 130.684  | LOC_Os04g31460.1 |
| DG <sub>HP</sub> | Os010543_01 | S7 | 0.934  | 1.521  | P | 264.501  | P | 505.417  | P | 176.106  | LOC_Os02g24700.1 |
| DG <sub>HP</sub> | Os010687_01 | S7 | 0.931  | 0.000  | P | 390.470  | P | 744.493  | P | 624.389  | LOC_Os02g03060.1 |
| DG <sub>HP</sub> | Os010761_01 | S7 | -0.996 | 0.000  | P | 1165.486 | P | 584.165  | P | 1202.738 | -                |
| DG <sub>HP</sub> | Os010778_01 | S7 | 0.000  | -1.380 | P | 208.493  | P | 212.618  | P | 553.455  | LOC_Os09g31438.1 |

|                  |             |    |        |        |   |          |   |          |   |          |                  |
|------------------|-------------|----|--------|--------|---|----------|---|----------|---|----------|------------------|
| DG <sub>HP</sub> | Os010812_01 | S7 | 0.760  | 0.000  | P | 120.761  | P | 204.543  | P | 196.198  | LOC_Os04g51450.1 |
| DG <sub>HP</sub> | Os010857_01 | S7 | -1.103 | 0.000  | P | 1347.752 | P | 627.638  | P | 469.098  | -                |
| DG <sub>HP</sub> | Os010884_01 | S7 | 0.000  | 1.515  | P | 1595.072 | P | 1103.586 | P | 386.011  | LOC_Os12g03110.1 |
| DG <sub>HP</sub> | Os010961_01 | S7 | 0.000  | -1.548 | P | 197.952  | P | 200.441  | P | 586.189  | -                |
| DG <sub>HP</sub> | Os011110_01 | S7 | 0.000  | 2.447  | P | 673.905  | P | 698.478  | P | 128.119  | LOC_Os01g47130.1 |
| DG <sub>HP</sub> | Os011125_01 | S7 | 0.000  | -2.257 | P | 360.254  | P | 303.347  | P | 1450.355 | LOC_Os08g40680.1 |
| DG <sub>HP</sub> | Os011262_01 | S7 | 0.000  | -1.399 | P | 270.726  | P | 207.513  | P | 547.397  | LOC_Os02g52150.2 |
| DG <sub>HP</sub> | Os011327_01 | S7 | -1.084 | 0.000  | P | 354.959  | P | 167.407  | A | 96.439   | LOC_Os02g31030.1 |
| DG <sub>HP</sub> | Os011374_01 | S7 | -0.799 | 0.000  | P | 437.238  | P | 251.296  | P | 379.980  | LOC_Os12g33944.1 |
| DG <sub>HP</sub> | Os011394_01 | S7 | 0.000  | -1.602 | P | 210.180  | P | 250.074  | P | 758.884  | LOC_Os12g34110.1 |
| DG <sub>HP</sub> | Os011401_01 | S7 | 0.000  | -1.624 | P | 189.045  | P | 212.512  | P | 654.832  | LOC_Os10g31856.1 |
| DG <sub>HP</sub> | Os011415_01 | S7 | 0.000  | -2.104 | P | 1717.589 | P | 1236.608 | P | 5317.170 | LOC_Os12g10604.1 |
| DG <sub>HP</sub> | Os011443_01 | S7 | 0.722  | 0.000  | P | 4410.726 | P | 7275.233 | P | 3760.505 | LOC_Os03g25340.1 |
| DG <sub>HP</sub> | Os011451_01 | S7 | 0.747  | 1.563  | P | 244.290  | P | 410.044  | P | 138.737  | LOC_Os07g43250.1 |
| DG <sub>HP</sub> | Os011578_01 | S7 | 0.000  | -2.294 | P | 391.761  | P | 399.472  | P | 1958.851 | LOC_Os03g38730.1 |
| DG <sub>HP</sub> | Os011660_01 | S7 | 0.000  | -1.381 | P | 215.755  | P | 160.763  | P | 418.700  | LOC_Os06g45820.1 |
| DG <sub>HP</sub> | Os011722_01 | S7 | 0.000  | -1.638 | P | 265.456  | P | 346.017  | P | 1077.294 | LOC_Os03g03390.1 |
| DG <sub>HP</sub> | Os011780_01 | S7 | -0.880 | 0.000  | P | 583.379  | P | 317.072  | P | 188.367  | LOC_Os01g66300.1 |
| DG <sub>HP</sub> | Os011824_01 | S7 | 0.000  | 1.515  | P | 1896.482 | P | 1797.458 | P | 628.874  | LOC_Os09g27420.1 |
| DG <sub>HP</sub> | Os011849_01 | S7 | 0.000  | 1.519  | P | 1130.670 | P | 899.301  | P | 313.852  | LOC_Os09g36230.1 |
| DG <sub>HP</sub> | Os011851_01 | S7 | 0.000  | -1.582 | P | 554.291  | P | 560.189  | P | 1677.178 | LOC_Os05g04630.6 |
| DG <sub>HP</sub> | Os011930_01 | S7 | 0.000  | -1.579 | P | 182.667  | P | 223.707  | P | 668.374  | LOC_Os08g38460.1 |
| DG <sub>HP</sub> | Os011998_01 | S7 | 0.992  | 0.000  | P | 218.228  | P | 433.929  | P | 213.670  | LOC_Os02g33770.1 |
| DG <sub>HP</sub> | Os012005_01 | S7 | -0.944 | 0.000  | P | 2896.106 | P | 1505.271 | P | 1517.368 | LOC_Os03g58640.1 |
| DG <sub>HP</sub> | Os012084_01 | S7 | 0.731  | 0.000  | P | 199.118  | P | 330.530  | A | 181.160  | LOC_Os06g10690.1 |
| DG <sub>HP</sub> | Os012239_01 | S7 | -1.553 | 0.000  | P | 3427.573 | P | 1168.023 | P | 1554.487 | -                |
| DG <sub>HP</sub> | Os012277_01 | S7 | 0.000  | 1.748  | P | 826.118  | P | 1350.935 | P | 402.120  | LOC_Os05g49170.1 |
| DG <sub>HP</sub> | Os012299_01 | S7 | 0.000  | 2.041  | P | 4632.289 | P | 3453.092 | P | 839.165  | LOC_Os09g38030.1 |
| DG <sub>HP</sub> | Os012311_01 | S7 | -1.267 | 0.000  | P | 3618.807 | P | 1503.610 | P | 2981.143 | LOC_Os03g63150.2 |
| DG <sub>HP</sub> | Os012346_01 | S7 | 0.000  | -1.421 | P | 168.170  | P | 160.555  | P | 430.007  | LOC_Os02g55120.1 |
| DG <sub>HP</sub> | Os012349_01 | S7 | 0.000  | -1.452 | A | 99.514   | P | 124.362  | P | 340.266  | LOC_Os03g61220.1 |

|                  |             |    |        |        |   |          |   |          |   |           |                  |
|------------------|-------------|----|--------|--------|---|----------|---|----------|---|-----------|------------------|
| DG <sub>HP</sub> | Os012425_01 | S7 | 0.784  | 0.000  | P | 159.818  | P | 275.205  | P | 368.004   | -                |
| DG <sub>HP</sub> | Os012450_01 | S7 | 0.726  | 0.000  | P | 224.267  | P | 370.831  | P | 281.705   | LOC_Os05g33850.1 |
| DG <sub>HP</sub> | Os012695_01 | S7 | 0.000  | -1.663 | P | 290.278  | P | 213.249  | P | 675.267   | LOC_Os02g43519.1 |
| DG <sub>HP</sub> | Os012723_01 | S7 | 0.000  | -2.141 | P | 645.951  | P | 628.498  | P | 2771.671  | LOC_Os03g03910.1 |
| DG <sub>HP</sub> | Os012753_01 | S7 | -0.886 | 0.000  | P | 1419.848 | P | 768.507  | P | 1342.972  | -                |
| DG <sub>HP</sub> | Os012781_01 | S7 | 0.000  | -2.761 | P | 140.344  | P | 178.812  | P | 1211.977  | LOC_Os11g25780.1 |
| DG <sub>HP</sub> | Os012813_01 | S7 | 0.000  | 1.590  | P | 5317.088 | P | 6219.339 | P | 2065.537  | LOC_Os03g03660.4 |
| DG <sub>HP</sub> | Os012910_01 | S7 | 0.000  | -2.341 | P | 121.889  | P | 148.854  | P | 754.269   | LOC_Os12g38170.1 |
| DG <sub>HP</sub> | Os013099_01 | S7 | 0.000  | -1.391 | P | 265.185  | P | 242.652  | P | 636.208   | LOC_Os04g39814.2 |
| DG <sub>HP</sub> | Os013133_01 | S7 | 0.000  | -1.532 | P | 1485.321 | P | 1076.469 | P | 3112.883  | LOC_Os03g02560.1 |
| DG <sub>HP</sub> | Os013145_01 | S7 | 0.000  | -1.493 | P | 286.292  | P | 293.014  | P | 825.036   | LOC_Os02g38820.1 |
| DG <sub>HP</sub> | Os013159_01 | S7 | -1.347 | -2.127 | P | 8262.199 | P | 3247.514 | P | 14182.455 | LOC_Os09g12540.1 |
| DG <sub>HP</sub> | Os013169_01 | S7 | 0.000  | -1.711 | P | 535.912  | P | 355.040  | P | 1162.184  | LOC_Os04g36720.1 |
| DG <sub>HP</sub> | Os013198_01 | S7 | 1.024  | 0.000  | P | 1361.300 | P | 2768.765 | P | 1598.095  | LOC_Os06g43510.2 |
| DG <sub>HP</sub> | Os013232_01 | S7 | 0.000  | -1.701 | P | 492.533  | P | 437.960  | P | 1424.000  | LOC_Os03g56280.1 |
| DG <sub>HP</sub> | Os013244_01 | S7 | 0.871  | 0.000  | P | 192.836  | P | 352.572  | P | 173.220   | LOC_Os05g06990.1 |
| DG <sub>HP</sub> | Os013250_01 | S7 | 1.248  | 0.000  | P | 782.013  | P | 1857.552 | P | 1088.079  | LOC_Os01g05510.5 |
| DG <sub>HP</sub> | Os013284_01 | S7 | 0.000  | -1.505 | P | 208.587  | P | 171.976  | P | 488.111   | LOC_Os09g28630.1 |
| DG <sub>HP</sub> | Os013295_01 | S7 | 0.000  | -2.092 | P | 449.358  | P | 460.416  | P | 1962.899  | -                |
| DG <sub>HP</sub> | Os013374_01 | S7 | 0.000  | -1.576 | P | 412.475  | P | 325.771  | P | 971.369   | LOC_Os03g58960.1 |
| DG <sub>HP</sub> | Os013388_01 | S7 | 0.000  | -1.824 | P | 322.675  | P | 294.689  | P | 1043.068  | LOC_Os01g07120.2 |
| DG <sub>HP</sub> | Os013426_01 | S7 | 0.000  | -1.704 | P | 182.131  | P | 154.537  | P | 503.542   | LOC_Os12g35630.1 |
| DG <sub>HP</sub> | Os013432_01 | S7 | 0.000  | -2.016 | A | 124.379  | P | 201.510  | P | 814.910   | -                |
| DG <sub>HP</sub> | Os013439_01 | S7 | 0.874  | 0.000  | P | 1862.879 | P | 3415.068 | P | 1757.202  | LOC_Os02g02770.1 |
| DG <sub>HP</sub> | Os013504_01 | S7 | 0.000  | -1.506 | P | 154.261  | P | 159.461  | P | 453.000   | LOC_Os03g15020.1 |
| DG <sub>HP</sub> | Os013568_01 | S7 | 0.000  | -1.825 | P | 184.244  | P | 183.277  | P | 649.480   | LOC_Os08g40150.2 |
| DG <sub>HP</sub> | Os013619_01 | S7 | 0.000  | -1.764 | P | 359.147  | P | 366.515  | P | 1244.464  | -                |
| DG <sub>HP</sub> | Os013643_01 | S7 | 0.000  | -1.755 | P | 215.907  | P | 209.267  | P | 706.440   | LOC_Os10g36550.3 |
| DG <sub>HP</sub> | Os013659_01 | S7 | 0.000  | -1.663 | P | 218.648  | P | 203.128  | P | 643.116   | LOC_Os03g60080.1 |
| DG <sub>HP</sub> | Os013712_01 | S7 | -1.100 | -2.063 | P | 5917.054 | P | 2759.895 | P | 11531.975 | LOC_Os09g26810.1 |
| DG <sub>HP</sub> | Os013725_01 | S7 | -1.377 | 0.000  | P | 2350.330 | P | 905.002  | P | 1121.170  | LOC_Os04g43800.1 |

|                  |             |    |        |        |   |           |   |           |   |           |                  |
|------------------|-------------|----|--------|--------|---|-----------|---|-----------|---|-----------|------------------|
| DG <sub>HP</sub> | Os013775_01 | S7 | 0.000  | -1.465 | P | 248.288   | P | 263.305   | P | 726.654   | LOC_Os01g48930.1 |
| DG <sub>HP</sub> | Os013901_01 | S7 | 0.771  | 0.000  | P | 2569.899  | P | 4385.966  | P | 2829.775  | LOC_Os04g42690.1 |
| DG <sub>HP</sub> | Os013937_01 | S7 | -1.747 | 0.000  | P | 3618.150  | P | 1077.918  | P | 1613.468  | LOC_Os05g07860.1 |
| DG <sub>HP</sub> | Os013958_01 | S7 | 0.000  | -1.657 | P | 617.052   | P | 438.424   | P | 1382.583  | LOC_Os01g18080.1 |
| DG <sub>HP</sub> | Os014071_01 | S7 | -1.774 | -2.554 | P | 7510.850  | P | 2195.844  | P | 12892.387 | LOC_Os12g19470.2 |
| DG <sub>HP</sub> | Os014092_01 | S7 | 0.000  | -1.533 | P | 243.671   | P | 245.315   | P | 709.902   | LOC_Os11g08300.1 |
| DG <sub>HP</sub> | Os014166_01 | S7 | -1.424 | -2.028 | P | 629.743   | P | 234.692   | P | 957.141   | LOC_Os08g02160.1 |
| DG <sub>HP</sub> | Os014181_01 | S7 | 0.735  | 0.000  | P | 150.785   | P | 250.957   | P | 306.348   | LOC_Os11g32260.1 |
| DG <sub>HP</sub> | Os014183_01 | S7 | 0.781  | 0.000  | P | 13560.463 | P | 23298.974 | P | 16655.402 | LOC_Os02g07690.1 |
| DG <sub>HP</sub> | Os014245_01 | S7 | 0.000  | 1.632  | P | 814.382   | P | 1124.673  | P | 362.981   | LOC_Os04g40660.3 |
| DG <sub>HP</sub> | Os014261_01 | S7 | -1.040 | -1.873 | P | 347.346   | P | 168.976   | P | 618.989   | LOC_Os06g33710.3 |
| DG <sub>HP</sub> | Os014282_01 | S7 | 0.000  | -1.790 | P | 106.665   | P | 164.228   | P | 568.009   | LOC_Os10g40030.8 |
| DG <sub>HP</sub> | Os014299_01 | S7 | 0.769  | 0.000  | P | 235.902   | P | 401.882   | P | 281.923   | LOC_Os05g46200.1 |
| DG <sub>HP</sub> | Os014344_01 | S7 | -0.918 | -1.691 | P | 479.396   | P | 253.632   | P | 818.891   | LOC_Os05g46360.1 |
| DG <sub>HP</sub> | Os014402_01 | S7 | 0.000  | -1.679 | A | 88.559    | P | 224.609   | P | 719.141   | LOC_Os04g37580.1 |
| DG <sub>HP</sub> | Os014409_01 | S7 | 0.779  | 0.000  | P | 3857.953  | P | 6621.333  | P | 3872.962  | LOC_Os08g35939.1 |
| DG <sub>HP</sub> | Os014441_01 | S7 | 0.000  | 1.655  | P | 442.300   | P | 584.798   | P | 185.638   | LOC_Os03g48310.1 |
| DG <sub>HP</sub> | Os014461_01 | S7 | 0.000  | 2.108  | A | 296.702   | P | 814.015   | P | 188.879   | LOC_Os01g63870.2 |
| DG <sub>HP</sub> | Os014555_01 | S7 | 0.000  | 2.175  | P | 13870.638 | P | 18281.943 | P | 4047.357  | LOC_Os06g51084.1 |
| DG <sub>HP</sub> | Os014556_01 | S7 | 0.802  | 1.720  | P | 310.839   | P | 542.012   | P | 164.474   | LOC_Os01g56870.1 |
| DG <sub>HP</sub> | Os014604_01 | S7 | 0.000  | -2.599 | P | 133.689   | P | 153.383   | P | 929.367   | LOC_Os01g04710.1 |
| DG <sub>HP</sub> | Os014654_01 | S7 | 0.000  | -1.856 | P | 252.109   | P | 242.904   | P | 879.149   | LOC_Os10g30790.2 |
| DG <sub>HP</sub> | Os014673_01 | S7 | -0.998 | 0.000  | P | 1306.782  | P | 654.278   | P | 1066.363  | LOC_Os02g42740.1 |
| DG <sub>HP</sub> | Os014740_01 | S7 | 0.000  | -2.825 | P | 673.780   | P | 399.520   | P | 2831.026  | LOC_Os07g36080.1 |
| DG <sub>HP</sub> | Os014760_01 | S7 | 0.000  | -1.527 | P | 282.817   | P | 257.999   | P | 743.667   | LOC_Os04g37710.1 |
| DG <sub>HP</sub> | Os014801_01 | S7 | 0.000  | -1.654 | A | 143.015   | P | 198.585   | P | 625.037   | LOC_Os06g40210.1 |
| DG <sub>HP</sub> | Os014879_01 | S7 | 1.518  | 0.000  | P | 106.151   | P | 304.096   | A | 321.302   | LOC_Os10g40550.2 |
| DG <sub>HP</sub> | Os014891_01 | S7 | 0.874  | 0.000  | P | 242.121   | P | 443.787   | P | 670.740   | LOC_Os03g01190.1 |
| DG <sub>HP</sub> | Os014986_01 | S7 | -0.777 | 0.000  | P | 598.289   | P | 349.189   | P | 250.679   | LOC_Os03g45390.1 |
| DG <sub>HP</sub> | Os015064_01 | S7 | 0.000  | -1.393 | P | 377.612   | P | 368.668   | P | 968.170   | LOC_Os02g40010.2 |
| DG <sub>HP</sub> | Os015105_01 | S7 | 1.023  | 0.000  | P | 207.515   | P | 421.800   | P | 203.205   | LOC_Os11g34710.1 |

|                  |             |    |        |        |   |          |   |          |   |          |                  |
|------------------|-------------|----|--------|--------|---|----------|---|----------|---|----------|------------------|
| DG <sub>HP</sub> | Os015132_01 | S7 | 0.760  | 0.000  | P | 193.030  | P | 326.867  | P | 352.544  | LOC_Os01g40420.1 |
| DG <sub>HP</sub> | Os015150_01 | S7 | 0.000  | -1.516 | P | 800.549  | P | 965.184  | P | 2760.007 | LOC_Os06g41010.4 |
| DG <sub>HP</sub> | Os015151_01 | S7 | 0.000  | -2.029 | P | 203.878  | P | 130.813  | P | 534.008  | LOC_Os10g02840.1 |
| DG <sub>HP</sub> | Os015152_01 | S7 | 0.000  | -1.619 | P | 219.736  | P | 273.171  | P | 838.852  | LOC_Os05g49300.1 |
| DG <sub>HP</sub> | Os015335_01 | S7 | 0.000  | 1.757  | P | 3931.652 | P | 4192.241 | P | 1240.456 | LOC_Os11g10050.1 |
| DG <sub>HP</sub> | Os015340_01 | S7 | 0.000  | -1.554 | P | 334.071  | P | 269.365  | P | 790.708  | -                |
| DG <sub>HP</sub> | Os015562_01 | S7 | 0.990  | 0.000  | P | 175.530  | P | 348.518  | A | 606.960  | LOC_Os12g05730.1 |
| DG <sub>HP</sub> | Os015569_01 | S7 | 0.000  | -1.476 | P | 336.026  | P | 257.931  | P | 717.342  | LOC_Os03g03350.1 |
| DG <sub>HP</sub> | Os015581_01 | S7 | 0.000  | -1.393 | P | 3556.675 | P | 2265.830 | P | 5950.242 | LOC_Os05g41900.2 |
| DG <sub>HP</sub> | Os015582_01 | S7 | -0.855 | -1.600 | P | 558.055  | P | 308.548  | P | 935.154  | LOC_Os04g45900.1 |
| DG <sub>HP</sub> | Os015666_01 | S7 | 0.000  | -1.768 | P | 1172.209 | P | 1128.268 | P | 3842.047 | LOC_Os03g10090.1 |
| DG <sub>HP</sub> | Os015668_01 | S7 | 1.012  | 0.000  | P | 376.161  | P | 758.523  | P | 1402.174 | LOC_Os01g72890.2 |
| DG <sub>HP</sub> | Os015672_01 | S7 | 0.000  | -1.495 | P | 209.499  | P | 177.003  | P | 498.968  | LOC_Os12g10540.4 |
| DG <sub>HP</sub> | Os015784_01 | S7 | 0.000  | -1.518 | P | 241.219  | P | 320.522  | P | 917.743  | LOC_Os02g06910.1 |
| DG <sub>HP</sub> | Os015790_01 | S7 | 0.000  | -1.779 | P | 626.488  | P | 710.063  | P | 2437.220 | -                |
| DG <sub>HP</sub> | Os015816_01 | S7 | 0.000  | -2.738 | P | 151.286  | P | 151.398  | P | 1009.824 | LOC_Os12g37840.1 |
| DG <sub>HP</sub> | Os015857_01 | S7 | 0.870  | 0.000  | P | 262.128  | P | 479.029  | P | 956.333  | LOC_Os02g53970.1 |
| DG <sub>HP</sub> | Os015885_01 | S7 | -1.005 | 0.000  | P | 1275.722 | P | 635.856  | P | 489.576  | -                |
| DG <sub>HP</sub> | Os015963_01 | S7 | 0.000  | -1.599 | P | 684.775  | P | 493.264  | P | 1494.005 | LOC_Os03g10620.1 |
| DG <sub>HP</sub> | Os016023_01 | S7 | 1.088  | 0.000  | P | 164.977  | P | 350.671  | P | 590.164  | LOC_Os11g38980.4 |
| DG <sub>HP</sub> | Os016085_01 | S7 | 0.000  | -1.611 | P | 766.024  | P | 855.945  | P | 2615.428 | LOC_Os09g12150.1 |
| DG <sub>HP</sub> | Os016102_01 | S7 | -1.630 | 0.000  | P | 2616.095 | P | 845.412  | P | 1037.527 | LOC_Os03g40100.1 |
| DG <sub>HP</sub> | Os016116_01 | S7 | 2.454  | 0.000  | P | 160.642  | P | 880.413  | P | 1621.964 | LOC_Os04g53450.1 |
| DG <sub>HP</sub> | Os016154_01 | S7 | 0.000  | -1.860 | A | 83.549   | P | 175.098  | P | 635.672  | LOC_Os12g23780.2 |
| DG <sub>HP</sub> | Os016157_01 | S7 | 0.818  | 0.000  | P | 204.219  | P | 360.150  | P | 489.508  | LOC_Os09g01640.1 |
| DG <sub>HP</sub> | Os016158_01 | S7 | 0.775  | 0.000  | P | 144.214  | P | 246.707  | P | 216.482  | LOC_Os11g42800.1 |
| DG <sub>HP</sub> | Os016190_01 | S7 | 0.000  | -1.406 | P | 182.831  | P | 171.271  | P | 453.824  | LOC_Os12g28177.1 |
| DG <sub>HP</sub> | Os016207_01 | S7 | 0.778  | 0.000  | P | 123.155  | P | 211.245  | P | 172.386  | LOC_Os03g61140.1 |
| DG <sub>HP</sub> | Os016221_01 | S7 | 0.000  | 2.174  | P | 1899.947 | P | 2924.606 | P | 648.170  | LOC_Os05g02060.1 |
| DG <sub>HP</sub> | Os016225_01 | S7 | 0.000  | -1.418 | P | 675.366  | P | 654.811  | P | 1750.185 | LOC_Os01g52260.1 |
| DG <sub>HP</sub> | Os016331_01 | S7 | 0.788  | 0.000  | P | 166.478  | P | 287.379  | P | 318.594  | LOC_Os06g02450.1 |

|                  |             |    |        |        |   |           |   |           |   |           |                  |
|------------------|-------------|----|--------|--------|---|-----------|---|-----------|---|-----------|------------------|
| DG <sub>HP</sub> | Os016332_01 | S7 | 0.000  | -1.492 | P | 675.703   | P | 639.444   | P | 1798.288  | LOC_Os04g40300.1 |
| DG <sub>HP</sub> | Os016432_01 | S7 | 0.000  | -1.500 | P | 543.655   | P | 383.943   | P | 1085.902  | LOC_Os03g05390.6 |
| DG <sub>HP</sub> | Os016442_01 | S7 | 0.000  | 2.626  | P | 7831.776  | P | 10095.013 | P | 1635.724  | LOC_Os01g44220.6 |
| DG <sub>HP</sub> | Os016456_01 | S7 | 0.000  | 1.811  | P | 1055.816  | P | 1348.390  | P | 384.378   | LOC_Os02g01010.1 |
| DG <sub>HP</sub> | Os016500_01 | S7 | 0.000  | -1.402 | P | 616.680   | P | 370.452   | P | 978.725   | LOC_Os02g57280.1 |
| DG <sub>HP</sub> | Os016661_01 | S7 | 0.000  | 2.015  | P | 6347.373  | P | 6434.667  | P | 1591.863  | LOC_Os08g25734.1 |
| DG <sub>HP</sub> | Os016701_01 | S7 | 0.000  | -1.419 | A | 92.968    | P | 133.307   | P | 356.538   | LOC_Os06g44160.1 |
| DG <sub>HP</sub> | Os016769_01 | S7 | 0.864  | 0.000  | P | 284.608   | P | 518.072   | P | 296.791   | LOC_Os02g04330.2 |
| DG <sub>HP</sub> | Os016771_01 | S7 | -1.475 | 0.000  | P | 2533.449  | P | 911.500   | P | 853.364   | LOC_Os07g37530.2 |
| DG <sub>HP</sub> | Os016793_01 | S7 | 0.000  | -1.387 | A | 95.684    | P | 117.903   | P | 308.281   | LOC_Os02g52780.1 |
| DG <sub>HP</sub> | Os016818_01 | S7 | 0.000  | -1.429 | P | 290.073   | P | 210.888   | P | 567.710   | LOC_Os02g01150.2 |
| DG <sub>HP</sub> | Os016878_01 | S7 | 0.000  | -1.681 | P | 234.280   | P | 215.409   | P | 690.912   | LOC_Os02g18450.1 |
| DG <sub>HP</sub> | Os016919_01 | S7 | 0.000  | -1.498 | P | 259.870   | P | 357.705   | P | 1010.437  | LOC_Os02g01590.1 |
| DG <sub>HP</sub> | Os017021_01 | S7 | -0.821 | 0.000  | P | 449.909   | P | 254.730   | P | 512.061   | LOC_Os09g01140.1 |
| DG <sub>HP</sub> | Os017058_01 | S7 | 0.000  | -1.725 | P | 203.688   | P | 176.115   | P | 582.149   | LOC_Os05g33940.1 |
| DG <sub>HP</sub> | Os017090_01 | S7 | 1.517  | 0.000  | P | 157.001   | P | 449.270   | P | 581.098   | LOC_Os02g47150.1 |
| DG <sub>HP</sub> | Os017149_01 | S7 | 0.000  | -1.563 | P | 417.246   | P | 369.210   | P | 1090.543  | LOC_Os03g01030.1 |
| DG <sub>HP</sub> | Os017217_01 | S7 | 1.050  | 0.000  | P | 286.910   | P | 594.133   | P | 249.137   | LOC_Os03g21620.1 |
| DG <sub>HP</sub> | Os017238_01 | S7 | 0.000  | -1.816 | P | 514.797   | P | 434.582   | P | 1530.288  | LOC_Os07g01820.1 |
| DG <sub>HP</sub> | Os017409_01 | S7 | 0.000  | -1.525 | P | 336.812   | P | 310.187   | P | 892.629   | LOC_Os12g01449.1 |
| DG <sub>HP</sub> | Os017416_01 | S7 | -0.939 | 0.000  | P | 369.495   | P | 192.706   | P | 130.711   | LOC_Os10g05980.1 |
| DG <sub>HP</sub> | Os017420_01 | S7 | -0.790 | 0.000  | P | 318.153   | P | 183.978   | P | 413.464   | LOC_Os02g36210.1 |
| DG <sub>HP</sub> | Os017640_01 | S7 | 0.000  | -1.433 | P | 299.448   | P | 210.118   | P | 567.416   | LOC_Os05g22614.1 |
| DG <sub>HP</sub> | Os017653_01 | S7 | 0.000  | -1.925 | P | 172.363   | P | 255.583   | P | 970.575   | LOC_Os02g33330.1 |
| DG <sub>HP</sub> | Os017707_01 | S7 | 0.725  | 0.000  | P | 191.456   | P | 316.364   | P | 378.633   | LOC_Os05g07070.7 |
| DG <sub>HP</sub> | Os017744_01 | S7 | 0.000  | 1.558  | P | 3497.847  | P | 2655.476  | P | 901.547   | LOC_Os11g06750.1 |
| DG <sub>HP</sub> | Os017843_01 | S7 | 0.000  | 1.681  | P | 446.716   | P | 495.071   | P | 154.351   | LOC_Os05g40790.1 |
| DG <sub>HP</sub> | Os017858_01 | S7 | -0.838 | 0.000  | P | 22370.853 | P | 12514.694 | P | 13561.179 | LOC_Os03g56580.1 |
| DG <sub>HP</sub> | Os017901_01 | S7 | 0.737  | 0.000  | P | 349.923   | P | 583.327   | P | 365.702   | LOC_Os05g37970.1 |
| DG <sub>HP</sub> | Os017908_01 | S7 | 0.000  | 1.904  | P | 4571.905  | P | 3832.909  | P | 1024.270  | LOC_Os03g14450.1 |
| DG <sub>HP</sub> | Os017943_01 | S7 | 0.000  | -1.776 | P | 371.370   | P | 282.131   | P | 966.233   | LOC_Os07g12340.1 |

|                  |             |    |        |        |   |           |   |          |   |           |                  |
|------------------|-------------|----|--------|--------|---|-----------|---|----------|---|-----------|------------------|
| DG <sub>HP</sub> | Os017944_01 | S7 | 0.000  | -1.536 | P | 791.184   | P | 648.894  | P | 1881.983  | LOC_Os04g18090.1 |
| DG <sub>HP</sub> | Os018056_01 | S7 | 0.000  | -3.110 | P | 138.569   | P | 151.858  | P | 1310.740  | LOC_Os05g15880.1 |
| DG <sub>HP</sub> | Os018064_01 | S7 | -0.785 | -1.714 | P | 1154.132  | P | 669.854  | P | 2198.006  | LOC_Os05g48422.1 |
| DG <sub>HP</sub> | Os018162_01 | S7 | -1.542 | 0.000  | P | 1738.834  | P | 597.020  | P | 438.601   | LOC_Os05g34670.1 |
| DG <sub>HP</sub> | Os018260_01 | S7 | 0.000  | 2.048  | P | 1806.795  | P | 1667.597 | P | 403.146   | LOC_Os06g02028.1 |
| DG <sub>HP</sub> | Os018278_01 | S7 | 0.000  | -1.438 | P | 252.298   | P | 233.527  | P | 632.587   | LOC_Os10g35840.1 |
| DG <sub>HP</sub> | Os018280_01 | S7 | -0.911 | 0.000  | P | 1765.406  | P | 939.092  | P | 962.365   | LOC_Os12g32940.1 |
| DG <sub>HP</sub> | Os018393_01 | S7 | 0.000  | -1.533 | P | 247.150   | P | 211.930  | P | 613.461   | LOC_Os09g38090.1 |
| DG <sub>HP</sub> | Os018465_01 | S7 | 0.000  | -1.399 | P | 198.069   | P | 162.364  | P | 428.296   | LOC_Os01g01710.1 |
| DG <sub>HP</sub> | Os018479_01 | S7 | 0.000  | 1.580  | P | 893.334   | P | 695.196  | P | 232.542   | LOC_Os02g55560.1 |
| DG <sub>HP</sub> | Os018515_01 | S7 | 0.000  | -1.578 | P | 127.200   | P | 159.809  | P | 476.959   | LOC_Os02g43500.2 |
| DG <sub>HP</sub> | Os018550_01 | S7 | -1.483 | 0.000  | P | 9430.701  | P | 3372.812 | P | 4717.914  | LOC_Os06g08740.1 |
| DG <sub>HP</sub> | Os018724_01 | S7 | -1.034 | 0.000  | P | 5351.230  | P | 2612.619 | P | 4956.745  | LOC_Os07g38270.1 |
| DG <sub>HP</sub> | Os018737_01 | S7 | 0.839  | 0.000  | P | 1204.128  | P | 2154.694 | P | 1225.674  | LOC_Os02g39710.1 |
| DG <sub>HP</sub> | Os018818_01 | S7 | 0.000  | -1.490 | P | 5180.402  | P | 5024.303 | P | 14114.904 | -                |
| DG <sub>HP</sub> | Os018821_01 | S7 | -0.973 | 0.000  | P | 521.683   | P | 265.790  | P | 490.458   | LOC_Os07g06620.1 |
| DG <sub>HP</sub> | Os018886_01 | S7 | 0.000  | 2.800  | P | 10070.764 | P | 6994.262 | P | 1004.306  | LOC_Os07g42490.2 |
| DG <sub>HP</sub> | Os018915_01 | S7 | -0.966 | 0.000  | P | 1057.662  | P | 541.288  | P | 560.327   | LOC_Os04g43760.1 |
| DG <sub>HP</sub> | Os018960_01 | S7 | 0.000  | -1.569 | P | 672.619   | P | 472.087  | P | 1401.004  | LOC_Os03g52840.1 |
| DG <sub>HP</sub> | Os019225_01 | S7 | -0.774 | 0.000  | P | 1753.338  | P | 1025.500 | P | 1032.328  | LOC_Os01g63930.2 |
| DG <sub>HP</sub> | Os019241_01 | S7 | 0.000  | -1.572 | P | 162.497   | P | 165.199  | P | 491.238   | LOC_Os01g09620.2 |
| DG <sub>HP</sub> | Os019287_01 | S7 | 0.000  | -1.743 | P | 215.213   | P | 222.589  | P | 745.072   | LOC_Os01g65080.3 |
| DG <sub>HP</sub> | Os019289_01 | S7 | 0.855  | 0.000  | P | 119.602   | P | 216.334  | P | 199.827   | LOC_Os04g28420.1 |
| DG <sub>HP</sub> | Os019437_01 | S7 | 0.731  | 0.000  | P | 131.956   | P | 219.083  | P | 262.584   | LOC_Os12g42260.2 |
| DG <sub>HP</sub> | Os019511_01 | S7 | 0.000  | -1.640 | P | 345.968   | P | 301.988  | P | 940.903   | LOC_Os06g47350.2 |
| DG <sub>HP</sub> | Os019620_01 | S7 | 0.000  | -1.688 | P | 420.471   | P | 273.540  | P | 881.449   | LOC_Os06g42720.1 |
| DG <sub>HP</sub> | Os019636_01 | S7 | 0.000  | -1.440 | P | 203.166   | P | 210.314  | P | 570.622   | -                |
| DG <sub>HP</sub> | Os019688_01 | S7 | 0.000  | 1.961  | P | 3695.506  | P | 2946.381 | P | 756.974   | LOC_Os04g02820.2 |
| DG <sub>HP</sub> | Os019785_01 | S7 | -1.336 | 0.000  | P | 10326.876 | P | 4089.308 | P | 5351.977  | LOC_Os02g55970.2 |
| DG <sub>HP</sub> | Os019891_01 | S7 | 0.000  | -1.737 | P | 113.123   | P | 169.476  | P | 564.952   | LOC_Os08g43334.1 |
| DG <sub>HP</sub> | Os020036_01 | S7 | 0.000  | -2.338 | P | 122.508   | P | 128.221  | P | 648.210   | LOC_Os07g38130.1 |



|                  |             |    |        |        |   |          |   |          |   |           |                  |
|------------------|-------------|----|--------|--------|---|----------|---|----------|---|-----------|------------------|
| DG <sub>HP</sub> | Os020076_01 | S7 | 0.860  | 0.000  | P | 580.050  | P | 1052.967 | P | 1058.893  | LOC_Os08g39380.1 |
| DG <sub>HP</sub> | Os020201_01 | S7 | 0.000  | -2.552 | P | 967.750  | P | 874.560  | P | 5129.359  | LOC_Os01g03680.1 |
| DG <sub>HP</sub> | Os020229_01 | S7 | 0.846  | 0.000  | P | 1218.666 | P | 2190.831 | P | 1719.900  | LOC_Os05g02250.2 |
| DG <sub>HP</sub> | Os020320_01 | S7 | 0.000  | -1.494 | P | 3874.358 | P | 3589.021 | P | 10107.778 | LOC_Os10g05690.1 |
| DG <sub>HP</sub> | Os020373_01 | S7 | 1.005  | 0.000  | P | 354.841  | P | 712.009  | P | 261.800   | LOC_Os04g27980.1 |
| DG <sub>HP</sub> | Os020390_01 | S7 | 0.000  | -2.417 | P | 377.694  | P | 521.958  | P | 2787.367  | LOC_Os03g58070.1 |
| DG <sub>HP</sub> | Os020392_01 | S7 | 0.000  | -1.998 | P | 355.978  | P | 466.862  | P | 1864.301  | LOC_Os03g15050.2 |
| DG <sub>HP</sub> | Os020523_01 | S7 | -0.791 | 0.000  | P | 587.289  | P | 339.362  | P | 390.525   | LOC_Os02g55080.1 |
| DG <sub>HP</sub> | Os020653_01 | S7 | 0.000  | -1.375 | P | 169.845  | P | 177.736  | P | 461.143   | LOC_Os11g05990.1 |
| DG <sub>HP</sub> | Os020769_01 | S7 | 0.000  | -2.127 | P | 404.228  | P | 359.888  | P | 1571.991  | LOC_Os03g46060.1 |
| DG <sub>HP</sub> | Os020778_01 | S7 | 0.797  | 0.000  | P | 492.139  | P | 855.151  | P | 345.206   | LOC_Os07g44430.2 |
| DG <sub>HP</sub> | Os020841_01 | S7 | -1.213 | 0.000  | P | 1253.846 | P | 540.839  | P | 649.380   | LOC_Os05g06500.1 |
| DG <sub>HP</sub> | Os020948_01 | S7 | -0.793 | 0.000  | P | 279.516  | P | 161.265  | P | 181.969   | LOC_Os04g46880.2 |
| DG <sub>HP</sub> | Os020966_01 | S7 | 0.000  | 1.647  | P | 660.053  | P | 822.362  | P | 262.588   | LOC_Os03g55350.1 |
| DG <sub>HP</sub> | Os020983_01 | S7 | 0.000  | -1.460 | P | 173.178  | P | 220.754  | P | 607.339   | LOC_Os06g46410.1 |
| DG <sub>HP</sub> | Os021029_01 | S7 | 0.943  | 0.000  | P | 155.887  | P | 299.654  | P | 247.367   | LOC_Os01g10930.1 |
| DG <sub>HP</sub> | Os021035_01 | S7 | 0.000  | -2.333 | P | 1394.118 | P | 2191.610 | P | 11041.468 | -                |
| DG <sub>HP</sub> | Os021076_01 | S7 | 1.048  | 0.000  | P | 231.266  | P | 478.139  | P | 313.602   | LOC_Os01g03110.1 |
| DG <sub>HP</sub> | Os021097_01 | S7 | 0.000  | -1.627 | P | 388.306  | P | 446.464  | P | 1379.455  | LOC_Os04g24140.1 |
| DG <sub>HP</sub> | Os021113_01 | S7 | -0.977 | 0.000  | P | 607.993  | P | 308.860  | P | 415.575   | LOC_Os02g15700.1 |
| DG <sub>HP</sub> | Os021202_01 | S7 | 0.000  | 1.823  | P | 2449.307 | P | 2353.217 | P | 665.076   | LOC_Os01g55540.1 |
| DG <sub>HP</sub> | Os021296_01 | S7 | 1.030  | 0.000  | P | 2333.350 | P | 4763.519 | P | 2766.301  | LOC_Os03g19780.1 |
| DG <sub>HP</sub> | Os021314_01 | S7 | 0.818  | 0.000  | P | 996.491  | P | 1756.535 | P | 986.917   | LOC_Os07g42290.1 |
| DG <sub>HP</sub> | Os021349_01 | S7 | 0.000  | 1.717  | P | 1016.798 | P | 1109.166 | P | 337.380   | LOC_Os02g54160.1 |
| DG <sub>HP</sub> | Os021367_01 | S7 | 0.000  | -1.605 | P | 477.492  | P | 440.209  | P | 1338.689  | LOC_Os01g01410.1 |
| DG <sub>HP</sub> | Os021383_01 | S7 | 1.083  | 0.000  | P | 748.631  | P | 1585.444 | P | 652.661   | LOC_Os03g54910.1 |
| DG <sub>HP</sub> | Os021429_01 | S7 | 0.000  | -1.931 | A | 46.641   | P | 152.566  | P | 581.962   | LOC_Os12g20390.4 |
| DG <sub>HP</sub> | Os021445_01 | S7 | 0.000  | -1.827 | P | 558.032  | P | 556.238  | P | 1974.022  | LOC_Os08g06110.1 |
| DG <sub>HP</sub> | Os021453_01 | S7 | 0.000  | -1.540 | P | 324.572  | P | 397.936  | P | 1157.063  | LOC_Os02g12760.1 |
| DG <sub>HP</sub> | Os021455_01 | S7 | 0.000  | -1.467 | A | 112.635  | P | 166.291  | P | 459.617   | LOC_Os03g55820.1 |
| DG <sub>HP</sub> | Os021495_01 | S7 | 0.000  | -1.868 | P | 168.865  | P | 215.374  | P | 786.435   | LOC_Os12g38640.1 |

|                  |             |    |        |        |   |          |   |          |   |          |                  |
|------------------|-------------|----|--------|--------|---|----------|---|----------|---|----------|------------------|
| DG <sub>HP</sub> | Os021497_01 | S7 | 0.000  | -2.039 | P | 262.624  | P | 223.018  | P | 916.733  | LOC_Os06g40080.1 |
| DG <sub>HP</sub> | Os021521_01 | S7 | 0.000  | -2.044 | A | 112.666  | P | 163.332  | P | 673.414  | LOC_Os01g03490.1 |
| DG <sub>HP</sub> | Os021643_01 | S7 | 0.000  | -1.861 | P | 133.696  | P | 177.220  | P | 643.915  | LOC_Os01g62610.1 |
| DG <sub>HP</sub> | Os021757_01 | S7 | -0.793 | 0.000  | P | 3282.352 | P | 1893.929 | P | 1736.760 | LOC_Os09g36740.1 |
| DG <sub>HP</sub> | Os021777_01 | S7 | 0.000  | -1.512 | P | 142.608  | P | 162.487  | P | 463.445  | -                |
| DG <sub>HP</sub> | Os021798_01 | S7 | 0.000  | -1.676 | P | 228.684  | P | 173.145  | P | 553.397  | LOC_Os11g08380.1 |
| DG <sub>HP</sub> | Os021834_01 | S7 | 0.898  | 0.000  | P | 2088.164 | P | 3891.696 | P | 2085.880 | LOC_Os08g27720.1 |
| DG <sub>HP</sub> | Os021893_01 | S7 | 0.000  | -1.733 | P | 159.845  | P | 128.828  | P | 428.397  | LOC_Os09g35030.1 |
| DG <sub>HP</sub> | Os021895_01 | S7 | -0.828 | 0.000  | P | 293.590  | P | 165.402  | P | 407.469  | LOC_Os08g28180.2 |
| DG <sub>HP</sub> | Os021896_01 | S7 | -0.827 | 0.000  | P | 366.804  | P | 206.765  | P | 158.854  | LOC_Os01g47780.1 |
| DG <sub>HP</sub> | Os021978_01 | S7 | 0.000  | -1.612 | P | 291.726  | P | 200.766  | P | 613.831  | LOC_Os02g39160.1 |
| DG <sub>HP</sub> | Os021980_01 | S7 | 0.000  | -2.101 | P | 568.180  | P | 418.141  | P | 1794.472 | LOC_Os05g03760.1 |
| DG <sub>HP</sub> | Os022003_01 | S7 | 0.000  | 1.492  | P | 1377.501 | P | 1134.591 | P | 403.343  | LOC_Os04g20220.1 |
| DG <sub>HP</sub> | Os022055_01 | S7 | -0.946 | 0.000  | P | 8427.329 | P | 4373.315 | P | 9498.371 | LOC_Os11g07020.1 |
| DG <sub>HP</sub> | Os022057_01 | S7 | 0.742  | 0.000  | P | 209.797  | P | 350.862  | P | 303.742  | LOC_Os01g10850.1 |
| DG <sub>HP</sub> | Os022072_01 | S7 | 0.000  | -1.694 | P | 177.871  | P | 143.776  | P | 465.281  | LOC_Os06g49880.1 |
| DG <sub>HP</sub> | Os022074_01 | S7 | -1.000 | 0.000  | P | 1996.941 | P | 998.255  | P | 1835.438 | LOC_Os06g15400.1 |
| DG <sub>HP</sub> | Os022083_01 | S7 | -0.930 | -1.856 | P | 669.457  | P | 351.386  | P | 1271.622 | LOC_Os03g63280.1 |
| DG <sub>HP</sub> | Os022142_01 | S7 | 0.000  | -1.525 | P | 364.396  | P | 333.165  | P | 958.592  | LOC_Os09g31200.1 |
| DG <sub>HP</sub> | Os022154_01 | S7 | 0.000  | -1.588 | P | 131.648  | P | 144.119  | P | 433.216  | LOC_Os08g42100.1 |
| DG <sub>HP</sub> | Os022183_01 | S7 | 0.000  | -1.405 | P | 498.234  | P | 295.122  | P | 781.301  | LOC_Os10g40390.1 |
| DG <sub>HP</sub> | Os022228_01 | S7 | -1.555 | 0.000  | P | 5429.930 | P | 1847.845 | P | 2621.709 | LOC_Os10g41250.1 |
| DG <sub>HP</sub> | Os022300_01 | S7 | 0.000  | -1.948 | P | 295.846  | P | 347.761  | P | 1341.540 | -                |
| DG <sub>HP</sub> | Os022309_01 | S7 | 0.000  | -1.811 | P | 191.749  | P | 209.859  | P | 736.577  | LOC_Os05g10670.1 |
| DG <sub>HP</sub> | Os022434_01 | S7 | -1.524 | 0.000  | P | 3601.769 | P | 1252.482 | P | 1975.860 | LOC_Os01g67310.1 |
| DG <sub>HP</sub> | Os022652_01 | S7 | 0.000  | -1.665 | A | 103.612  | P | 121.980  | P | 386.810  | LOC_Os02g18750.1 |
| DG <sub>HP</sub> | Os022779_01 | S7 | -0.793 | 0.000  | P | 1210.720 | P | 698.932  | P | 434.590  | -                |
| DG <sub>HP</sub> | Os022953_01 | S7 | 0.789  | 0.000  | P | 980.090  | P | 1693.218 | P | 1467.030 | LOC_Os09g38850.1 |
| DG <sub>HP</sub> | Os022978_01 | S7 | 0.753  | 0.000  | P | 342.212  | P | 576.584  | P | 528.535  | LOC_Os01g49260.1 |
| DG <sub>HP</sub> | Os022995_01 | S7 | 0.791  | 0.000  | P | 5148.264 | P | 8909.723 | P | 3611.368 | LOC_Os07g11330.1 |
| DG <sub>HP</sub> | Os023000_01 | S7 | 0.860  | 0.000  | P | 537.186  | P | 975.199  | P | 826.655  | LOC_Os03g26010.1 |

|                  |             |    |        |        |   |          |   |          |   |          |                  |
|------------------|-------------|----|--------|--------|---|----------|---|----------|---|----------|------------------|
| DG <sub>HP</sub> | Os023001_01 | S7 | 0.875  | 0.000  | P | 1941.946 | P | 3561.228 | P | 3782.130 | LOC_Os10g40040.1 |
| DG <sub>HP</sub> | Os023010_01 | S7 | 0.000  | 2.161  | P | 1175.687 | P | 1447.000 | P | 323.567  | LOC_Os01g68820.1 |
| DG <sub>HP</sub> | Os023012_01 | S7 | 0.743  | 0.000  | P | 896.316  | P | 1500.277 | P | 1005.184 | LOC_Os09g26380.1 |
| DG <sub>HP</sub> | Os023026_01 | S7 | 0.862  | 0.000  | P | 793.191  | P | 1441.784 | P | 1188.416 | LOC_Os07g02910.1 |
| DG <sub>HP</sub> | Os023028_01 | S7 | 0.768  | 0.000  | P | 599.060  | P | 1020.334 | P | 378.965  | LOC_Os05g49930.1 |
| DG <sub>HP</sub> | Os023032_01 | S7 | 0.776  | 0.000  | P | 107.553  | P | 184.140  | P | 121.672  | LOC_Os04g32070.1 |
| DG <sub>HP</sub> | Os023038_01 | S7 | 1.374  | 0.000  | P | 112.811  | P | 292.470  | P | 135.079  | LOC_Os04g35000.1 |
| DG <sub>HP</sub> | Os023039_01 | S7 | 0.000  | 2.162  | P | 818.326  | P | 1182.264 | P | 264.207  | LOC_Os07g34620.1 |
| DG <sub>HP</sub> | Os023043_01 | S7 | 0.000  | 2.394  | P | 1636.869 | P | 2010.903 | P | 382.548  | LOC_Os05g06480.1 |
| DG <sub>HP</sub> | Os023048_01 | S7 | 0.000  | 1.663  | P | 2109.018 | P | 2767.888 | P | 874.144  | LOC_Os02g12310.1 |
| DG <sub>HP</sub> | Os023065_01 | S7 | 0.761  | 0.000  | P | 2338.927 | P | 3962.624 | P | 2752.288 | LOC_Os01g20120.1 |
| DG <sub>HP</sub> | Os023085_01 | S7 | 0.000  | 2.078  | P | 2729.773 | P | 2842.622 | P | 673.259  | LOC_Os05g34310.1 |
| DG <sub>HP</sub> | Os023116_01 | S7 | -0.912 | -1.812 | P | 942.420  | P | 500.758  | P | 1757.960 | -                |
| DG <sub>HP</sub> | Os023156_01 | S7 | 0.000  | 1.779  | P | 550.269  | P | 688.292  | P | 200.553  | LOC_Os03g45210.1 |
| DG <sub>HP</sub> | Os023215_01 | S7 | -1.083 | 0.000  | P | 4524.381 | P | 2135.903 | P | 2595.244 | -                |
| DG <sub>HP</sub> | Os023328_01 | S7 | 0.000  | -2.447 | P | 276.153  | P | 187.335  | P | 1021.586 | LOC_Os11g18830.1 |
| DG <sub>HP</sub> | Os023465_01 | S7 | 1.473  | 0.000  | P | 293.866  | P | 815.606  | P | 734.852  | LOC_Os01g37200.1 |
| DG <sub>HP</sub> | Os023481_02 | S7 | 0.993  | 0.000  | P | 2867.779 | P | 5708.990 | P | 2669.547 | -                |
| DG <sub>HP</sub> | Os023486_01 | S7 | 0.873  | 0.000  | P | 208.411  | P | 381.642  | P | 169.628  | -                |
| DG <sub>HP</sub> | Os023508_01 | S7 | 0.000  | -1.753 | P | 237.831  | P | 323.829  | P | 1091.514 | LOC_Os08g04430.1 |
| DG <sub>HP</sub> | Os023530_01 | S7 | 1.511  | 1.505  | P | 448.274  | P | 1277.790 | P | 450.061  | LOC_Os07g12080.1 |
| DG <sub>HP</sub> | Os023575_01 | S7 | 1.066  | 0.000  | P | 115.645  | P | 242.148  | P | 178.570  | LOC_Os08g23870.1 |
| DG <sub>HP</sub> | Os023578_01 | S7 | 1.022  | 0.000  | P | 214.912  | P | 436.478  | P | 268.000  | LOC_Os04g38550.1 |
| DG <sub>HP</sub> | Os023619_01 | S7 | 1.879  | 0.000  | P | 355.554  | P | 1307.917 | P | 1222.049 | -                |
| DG <sub>HP</sub> | Os023631_01 | S7 | 0.000  | 1.503  | P | 452.985  | P | 524.211  | P | 185.004  | LOC_Os02g57350.1 |
| DG <sub>HP</sub> | Os023651_01 | S7 | 0.830  | 0.000  | P | 194.854  | P | 346.273  | A | 112.480  | LOC_Os03g58500.1 |
| DG <sub>HP</sub> | Os023673_01 | S7 | 0.743  | 0.000  | P | 174.428  | P | 291.936  | P | 193.702  | LOC_Os08g15420.1 |
| DG <sub>HP</sub> | Os023737_01 | S7 | 0.939  | 0.000  | P | 1442.170 | P | 2764.298 | P | 1247.053 | -                |
| DG <sub>HP</sub> | Os023819_01 | S7 | 0.000  | 2.280  | P | 1043.889 | P | 1266.167 | P | 260.716  | LOC_Os08g41030.1 |
| DG <sub>HP</sub> | Os023820_01 | S7 | 0.000  | 1.735  | P | 2361.229 | P | 3376.155 | P | 1013.981 | LOC_Os07g42390.1 |
| DG <sub>HP</sub> | Os023849_01 | S7 | -0.923 | 0.000  | P | 548.813  | P | 289.361  | P | 294.258  | LOC_Os10g25400.1 |

|                  |             |    |        |        |   |           |   |           |   |           |                  |
|------------------|-------------|----|--------|--------|---|-----------|---|-----------|---|-----------|------------------|
| DG <sub>HP</sub> | Os023934_01 | S7 | 0.000  | 1.984  | P | 515.271   | P | 606.801   | P | 153.404   | LOC_Os10g30944.1 |
| DG <sub>HP</sub> | Os023957_01 | S7 | 0.846  | 0.000  | P | 121.516   | P | 218.383   | A | 97.736    | LOC_Os05g50110.1 |
| DG <sub>HP</sub> | Os024035_01 | S7 | 0.000  | 2.411  | P | 7723.156  | P | 7841.582  | P | 1474.810  | LOC_Os10g02300.3 |
| DG <sub>HP</sub> | Os024239_01 | S7 | 0.000  | 1.679  | P | 886.662   | P | 1320.816  | P | 412.472   | LOC_Os07g38290.1 |
| DG <sub>HP</sub> | Os024417_01 | S7 | 0.873  | 0.000  | P | 5049.477  | P | 9245.212  | P | 4092.799  | LOC_Os01g13340.1 |
| DG <sub>HP</sub> | Os024437_01 | S7 | -1.082 | 0.000  | P | 3510.529  | P | 1658.317  | P | 3511.670  | -                |
| DG <sub>HP</sub> | Os024527_01 | S7 | 0.000  | -2.202 | P | 217.706   | P | 200.372   | P | 922.243   | LOC_Os03g18230.1 |
| DG <sub>HP</sub> | Os024540_01 | S7 | -0.827 | 0.000  | P | 510.908   | P | 288.075   | P | 258.625   | -                |
| DG <sub>HP</sub> | Os024624_01 | S7 | 0.855  | 0.000  | P | 1277.143  | P | 2310.017  | P | 1689.231  | LOC_Os04g58820.1 |
| DG <sub>HP</sub> | Os024704_01 | S7 | 1.013  | 0.000  | P | 1648.329  | P | 3327.527  | P | 1685.406  | -                |
| DG <sub>HP</sub> | Os024774_01 | S7 | -1.107 | -2.689 | P | 676.454   | P | 314.070   | P | 2025.993  | LOC_Os02g10390.1 |
| DG <sub>HP</sub> | Os024798_01 | S7 | 0.000  | -1.384 | P | 258.756   | P | 260.015   | P | 678.516   | LOC_Os05g48800.2 |
| DG <sub>HP</sub> | Os024827_01 | S7 | 0.000  | -1.452 | P | 208.753   | P | 207.402   | P | 567.465   | -                |
| DG <sub>HP</sub> | Os024959_01 | S7 | 0.000  | -1.517 | P | 191.261   | P | 159.817   | P | 457.493   | LOC_Os02g08150.1 |
| DG <sub>HP</sub> | Os025052_01 | S7 | 0.753  | 0.000  | P | 2510.627  | P | 4230.885  | P | 1843.976  | LOC_Os01g56570.1 |
| DG <sub>HP</sub> | Os025101_01 | S7 | 0.000  | 1.726  | P | 1796.991  | P | 1982.433  | P | 599.219   | LOC_Os08g31660.1 |
| DG <sub>HP</sub> | Os025108_01 | S7 | 0.810  | 1.528  | P | 689.944   | P | 1209.326  | P | 419.367   | LOC_Os11g24790.1 |
| DG <sub>HP</sub> | Os025168_01 | S7 | -1.094 | 0.000  | P | 292.135   | P | 136.900   | A | 92.106    | LOC_Os08g40280.1 |
| DG <sub>HP</sub> | Os025211_01 | S7 | 0.000  | 2.015  | P | 674.259   | P | 783.136   | P | 193.809   | LOC_Os11g32100.1 |
| DG <sub>HP</sub> | Os025567_01 | S7 | 0.728  | 0.000  | P | 487.462   | P | 807.522   | P | 618.645   | LOC_Os11g28270.3 |
| DG <sub>HP</sub> | Os025779_01 | S7 | 0.723  | 0.000  | P | 224.336   | P | 370.320   | P | 283.342   | LOC_Os01g74590.1 |
| DG <sub>HP</sub> | Os025786_01 | S7 | 0.000  | -1.802 | P | 302.680   | P | 284.665   | P | 992.978   | -                |
| DG <sub>HP</sub> | Os025787_01 | S7 | 0.000  | -1.713 | P | 11537.561 | P | 13779.576 | P | 45165.438 | LOC_Os12g04980.1 |
| DG <sub>HP</sub> | Os025968_01 | S7 | -0.831 | 0.000  | P | 1839.468  | P | 1034.119  | P | 755.516   | LOC_Os08g16780.1 |
| DG <sub>HP</sub> | Os026060_01 | S7 | 1.158  | 0.000  | P | 299.976   | P | 669.425   | P | 463.412   | -                |
| DG <sub>HP</sub> | Os026132_01 | S7 | 0.000  | 2.815  | P | 2952.463  | P | 3740.437  | P | 531.525   | LOC_Os03g25350.1 |
| DG <sub>HP</sub> | Os026172_01 | S7 | 0.771  | 0.000  | P | 204.111   | P | 348.334   | P | 566.417   | LOC_Os03g19170.1 |
| DG <sub>HP</sub> | Os026332_01 | S7 | 0.000  | 1.847  | P | 6813.919  | P | 7512.124  | P | 2088.457  | LOC_Os02g50110.1 |
| DG <sub>HP</sub> | Os026390_01 | S7 | 1.701  | 0.000  | P | 429.393   | P | 1396.152  | P | 1209.006  | LOC_Os05g25040.2 |
| DG <sub>HP</sub> | Os026553_01 | S7 | 1.216  | 0.000  | P | 178.422   | P | 414.581   | P | 592.385   | LOC_Os06g08520.1 |
| DG <sub>HP</sub> | Os026911_01 | S7 | 0.000  | 1.516  | P | 449.958   | P | 630.898   | P | 220.536   | LOC_Os03g20590.1 |

|                  |             |    |        |        |   |           |   |           |   |           |                  |
|------------------|-------------|----|--------|--------|---|-----------|---|-----------|---|-----------|------------------|
| DG <sub>HP</sub> | Os026917_01 | S7 | -1.026 | 0.000  | P | 3092.747  | P | 1518.986  | P | 1380.473  | LOC_Os04g52250.1 |
| DG <sub>HP</sub> | Os027044_01 | S7 | -1.165 | 0.000  | P | 8415.915  | P | 3752.137  | P | 6353.651  | LOC_Os09g15830.1 |
| DG <sub>HP</sub> | Os027065_01 | S7 | -0.935 | 0.000  | P | 2894.410  | P | 1513.457  | P | 812.996   | LOC_Os02g17210.1 |
| DG <sub>HP</sub> | Os027175_01 | S7 | 0.000  | -1.683 | P | 340.751   | P | 366.068   | P | 1175.599  | -                |
| DG <sub>HP</sub> | Os027379_02 | S7 | 0.000  | -1.531 | P | 396.824   | P | 389.928   | P | 1126.986  | -                |
| DG <sub>HP</sub> | Os027596_01 | S7 | 0.798  | 0.000  | P | 23728.958 | P | 41268.138 | P | 24813.159 | LOC_Os05g41970.1 |
| DG <sub>HP</sub> | Os027602_01 | S7 | 0.000  | -2.357 | P | 164.756   | P | 238.195   | P | 1219.962  | LOC_Os01g03380.1 |
| DG <sub>HP</sub> | Os027615_01 | S7 | -1.177 | -2.934 | P | 2195.492  | P | 970.909   | P | 7418.009  | LOC_Os09g17740.1 |
| DG <sub>HP</sub> | Os027629_01 | S7 | -0.789 | 0.000  | P | 1847.534  | P | 1069.017  | P | 2406.418  | -                |
| DG <sub>HP</sub> | Os027637_01 | S7 | -0.919 | 0.000  | P | 3837.045  | P | 2029.774  | P | 3181.002  | LOC_Os05g04510.2 |
| DG <sub>HP</sub> | Os027656_01 | S7 | 0.000  | 1.994  | P | 5749.587  | P | 6227.379  | P | 1563.154  | LOC_Os10g39420.1 |
| DG <sub>HP</sub> | Os027666_01 | S7 | 1.049  | 0.000  | P | 12365.158 | P | 25581.721 | P | 12490.756 | LOC_Os07g11380.1 |
| DG <sub>HP</sub> | Os027667_01 | S7 | -0.787 | 0.000  | P | 1373.746  | P | 796.361   | P | 462.359   | LOC_Os10g40430.1 |
| DG <sub>HP</sub> | Os027740_01 | S7 | 0.000  | -1.470 | P | 773.171   | P | 714.802   | P | 1980.040  | LOC_Os09g29690.1 |
| DG <sub>HP</sub> | Os027832_01 | S7 | 1.127  | 0.000  | P | 143.989   | P | 314.473   | P | 257.046   | LOC_Os02g46530.1 |
| DG <sub>HP</sub> | Os027938_01 | S7 | -1.144 | 0.000  | P | 1611.928  | P | 729.153   | P | 620.488   | -                |
| DG <sub>HP</sub> | Os028025_01 | S7 | 1.006  | 0.000  | P | 499.230   | P | 1002.433  | P | 582.846   | LOC_Os05g07240.1 |
| DG <sub>HP</sub> | Os028119_01 | S7 | 1.509  | 0.000  | P | 122.611   | P | 348.904   | P | 773.971   | LOC_Os09g25910.1 |
| DG <sub>HP</sub> | Os028141_01 | S7 | 1.003  | 0.000  | P | 1297.422  | P | 2599.770  | P | 1427.984  | LOC_Os09g20520.1 |
| DG <sub>HP</sub> | Os028171_01 | S7 | 0.000  | 2.349  | P | 3137.164  | P | 3186.666  | P | 625.513   | LOC_Os04g58220.1 |
| DG <sub>HP</sub> | Os028173_01 | S7 | 0.000  | 1.785  | P | 879.729   | P | 1074.268  | P | 311.734   | LOC_Os04g29290.1 |
| DG <sub>HP</sub> | Os028175_01 | S7 | 0.000  | 1.761  | P | 1396.592  | P | 1790.608  | P | 528.455   | LOC_Os11g30830.1 |
| DG <sub>HP</sub> | Os028183_01 | S7 | 0.000  | 2.006  | P | 835.616   | P | 1135.777  | P | 282.784   | LOC_Os05g48400.1 |
| DG <sub>HP</sub> | Os028190_01 | S7 | 0.736  | 0.000  | P | 195.047   | P | 324.955   | A | 66.606    | LOC_Os11g31380.1 |
| DG <sub>HP</sub> | Os028198_01 | S7 | 0.756  | 0.000  | P | 173.430   | P | 292.791   | P | 510.931   | LOC_Os03g59010.1 |
| DG <sub>HP</sub> | Os028201_01 | S7 | -0.852 | 0.000  | P | 406.755   | P | 225.366   | A | 43.560    | LOC_Os07g07180.1 |
| DG <sub>HP</sub> | Os028382_01 | S7 | 0.760  | 0.000  | P | 130.619   | P | 221.156   | P | 285.268   | LOC_Os06g02580.1 |
| DG <sub>HP</sub> | Os028477_01 | S7 | 0.773  | 0.000  | P | 108.124   | P | 184.761   | P | 218.058   | LOC_Os02g45330.1 |
| DG <sub>HP</sub> | Os028578_01 | S7 | -1.002 | 0.000  | P | 364.050   | P | 181.775   | A | 80.988    | LOC_Os07g32370.1 |
| DG <sub>HP</sub> | Os028680_01 | S7 | 0.000  | -1.923 | A | 92.016    | P | 174.957   | P | 663.626   | LOC_Os07g06100.1 |
| DG <sub>HP</sub> | Os029205_01 | S7 | 0.000  | 1.571  | P | 979.282   | P | 1321.747  | P | 444.874   | LOC_Os05g39400.1 |

|                  |             |    |        |        |   |           |   |           |   |           |                  |
|------------------|-------------|----|--------|--------|---|-----------|---|-----------|---|-----------|------------------|
| DG <sub>HP</sub> | Os029315_01 | S7 | 1.298  | 2.499  | P | 396.169   | P | 974.330   | P | 172.313   | LOC_Os07g30680.1 |
| DG <sub>HP</sub> | Os029316_01 | S7 | 0.000  | 2.766  | P | 636.414   | P | 1015.172  | P | 149.197   | LOC_Os11g04000.1 |
| DG <sub>HP</sub> | Os029431_01 | S7 | 0.807  | 0.000  | P | 178.987   | P | 313.153   | P | 192.509   | LOC_Os08g08790.1 |
| DG <sub>HP</sub> | Os029535_01 | S7 | 0.000  | -1.515 | P | 2284.679  | P | 1553.371  | P | 4439.250  | LOC_Os06g19770.1 |
| DG <sub>HP</sub> | Os029603_01 | S7 | 0.000  | 1.767  | P | 918.622   | P | 923.294   | P | 271.298   | LOC_Os10g25180.1 |
| DG <sub>HP</sub> | Os029666_01 | S7 | 0.875  | 0.000  | P | 192.940   | P | 353.850   | P | 472.623   | LOC_Os05g05610.1 |
| DG <sub>HP</sub> | Os029766_01 | S7 | -1.049 | 0.000  | P | 1019.379  | P | 492.543   | P | 332.796   | LOC_Os07g06400.1 |
| DG <sub>HP</sub> | Os029802_01 | S7 | 0.958  | -1.384 | P | 140.735   | P | 273.453   | P | 713.735   | LOC_Os08g35580.1 |
| DG <sub>HP</sub> | Os029812_01 | S7 | -1.505 | 0.000  | P | 771.530   | P | 271.860   | P | 372.082   | -                |
| DG <sub>HP</sub> | Os029832_01 | S7 | 1.098  | -1.593 | P | 145.930   | P | 312.306   | P | 942.020   | LOC_Os11g38160.1 |
| DG <sub>HP</sub> | Os029952_01 | S7 | 0.763  | 0.000  | P | 196.236   | P | 333.128   | P | 214.943   | LOC_Os08g33190.1 |
| DG <sub>HP</sub> | Os030085_01 | S7 | 0.000  | -2.058 | P | 163.862   | P | 183.357   | P | 763.750   | LOC_Os09g38670.1 |
| DG <sub>HP</sub> | Os030231_01 | S7 | 0.939  | 0.000  | P | 538.338   | P | 1032.435  | P | 928.888   | LOC_Os03g46100.1 |
| DG <sub>HP</sub> | Os030546_01 | S7 | -0.804 | 0.000  | P | 717.667   | P | 411.027   | P | 296.603   | LOC_Os09g16270.1 |
| DG <sub>HP</sub> | Os030891_01 | S7 | -1.015 | 0.000  | P | 1052.236  | P | 520.677   | P | 504.242   | LOC_Os02g41954.1 |
| DG <sub>HP</sub> | Os030952_01 | S7 | 0.000  | 1.796  | P | 438.482   | P | 692.971   | P | 199.557   | -                |
| DG <sub>HP</sub> | Os031048_01 | S7 | 0.966  | 0.000  | P | 4536.729  | P | 8860.520  | P | 4186.843  | LOC_Os06g19490.1 |
| DG <sub>HP</sub> | Os031090_01 | S7 | -1.100 | 0.000  | P | 5399.325  | P | 2519.514  | P | 6110.440  | LOC_Os12g14699.1 |
| DG <sub>HP</sub> | Os031487_01 | S7 | 0.965  | 0.000  | P | 7722.115  | P | 15069.210 | P | 10439.004 | LOC_Os04g53650.1 |
| DG <sub>HP</sub> | Os031586_01 | S7 | -1.074 | 0.000  | P | 10161.023 | P | 4827.908  | P | 1749.461  | LOC_Os08g08920.1 |
| DG <sub>HP</sub> | Os031648_01 | S7 | 0.000  | 1.837  | P | 875.313   | P | 717.254   | P | 200.829   | LOC_Os07g01450.1 |
| DG <sub>HP</sub> | Os031781_01 | S7 | -0.823 | 0.000  | P | 14201.805 | P | 8028.355  | P | 5330.768  | LOC_Os06g30530.1 |
| DG <sub>HP</sub> | Os032085_01 | S7 | 0.000  | -1.477 | P | 134.858   | P | 159.985   | P | 445.213   | LOC_Os06g10980.1 |
| DG <sub>HP</sub> | Os032146_01 | S7 | 0.941  | 0.000  | P | 171.239   | P | 328.753   | P | 211.904   | LOC_Os10g10620.1 |
| DG <sub>HP</sub> | Os032194_01 | S7 | 0.000  | -1.826 | P | 1608.363  | P | 946.726   | P | 3356.807  | LOC_Os08g43530.1 |
| DG <sub>HP</sub> | Os032197_01 | S7 | 1.155  | 0.000  | P | 308.132   | P | 686.149   | P | 440.541   | LOC_Os11g26570.1 |
| DG <sub>HP</sub> | Os032413_01 | S7 | -0.794 | 0.000  | P | 612.283   | P | 353.115   | P | 397.793   | LOC_Os01g11500.1 |
| DG <sub>HP</sub> | Os032446_01 | S7 | -1.193 | 0.000  | P | 808.637   | P | 353.808   | P | 213.795   | LOC_Os01g03914.2 |
| DG <sub>HP</sub> | Os032470_01 | S7 | 0.000  | 1.621  | P | 535.849   | P | 368.464   | P | 119.830   | LOC_Os08g04290.1 |
| DG <sub>HP</sub> | Os032673_01 | S7 | 0.000  | 1.495  | P | 1041.247  | P | 1475.264  | P | 523.244   | LOC_Os08g12810.1 |
| DG <sub>HP</sub> | Os032727_01 | S7 | 0.000  | -1.618 | P | 427.708   | P | 630.721   | P | 1936.533  | LOC_Os08g04520.1 |

|                  |             |    |        |        |   |           |   |           |   |           |                  |
|------------------|-------------|----|--------|--------|---|-----------|---|-----------|---|-----------|------------------|
| DG <sub>HP</sub> | Os032876_01 | S7 | 0.954  | 0.000  | P | 228.073   | P | 441.866   | P | 720.692   | LOC_Os12g32160.1 |
| DG <sub>HP</sub> | Os033148_01 | S7 | 1.576  | 0.000  | P | 173.264   | P | 516.419   | P | 1189.402  | LOC_Os08g32550.1 |
| DG <sub>HP</sub> | Os033186_01 | S7 | 0.749  | 1.756  | P | 507.100   | P | 852.405   | P | 252.340   | LOC_Os01g39850.1 |
| DG <sub>HP</sub> | Os033199_01 | S7 | 0.798  | 0.000  | P | 169.754   | P | 295.195   | P | 326.179   | -                |
| DG <sub>HP</sub> | Os033395_01 | S7 | 0.734  | 0.000  | P | 2835.707  | P | 4717.836  | P | 2035.913  | -                |
| DG <sub>HP</sub> | Os033430_01 | S7 | 0.000  | -2.150 | A | 32.896    | P | 202.470   | P | 898.396   | LOC_Os10g22630.1 |
| DG <sub>HP</sub> | Os033559_01 | S7 | 0.795  | -2.169 | P | 524.563   | P | 909.852   | P | 4090.591  | LOC_Os09g19550.1 |
| DG <sub>HP</sub> | Os033574_01 | S7 | 0.843  | 0.000  | P | 6436.009  | P | 11544.961 | P | 4638.252  | LOC_Os08g41760.1 |
| DG <sub>HP</sub> | Os034009_01 | S7 | 0.820  | 0.000  | P | 17379.337 | P | 30689.347 | P | 19140.097 | LOC_Os02g38170.1 |
| DG <sub>HP</sub> | Os034378_01 | S7 | -0.989 | 0.000  | P | 734.684   | P | 370.150   | P | 303.103   | LOC_Os03g18000.1 |
| DG <sub>HP</sub> | Os034493_01 | S7 | 0.000  | 1.496  | P | 955.275   | P | 1158.528  | P | 410.672   | LOC_Os02g34930.1 |
| DG <sub>HP</sub> | Os034533_01 | S7 | 0.000  | -1.528 | P | 363.012   | P | 384.220   | P | 1107.753  | LOC_Os05g12270.1 |
| DG <sub>HP</sub> | Os034598_01 | S7 | 0.000  | -1.465 | P | 866.699   | P | 651.358   | P | 1798.476  | LOC_Os05g23050.1 |
| DG <sub>HP</sub> | Os034649_01 | S7 | -1.019 | -2.743 | P | 1484.496  | P | 732.596   | P | 4905.739  | LOC_Os11g47980.1 |
| DG <sub>HP</sub> | Os034660_01 | S7 | -0.875 | 0.000  | P | 573.396   | P | 312.583   | P | 231.763   | LOC_Os05g11470.1 |
| DG <sub>HP</sub> | Os034855_01 | S7 | 1.167  | 0.000  | P | 153.606   | P | 345.016   | P | 567.969   | LOC_Os11g10330.1 |
| DG <sub>HP</sub> | Os034873_01 | S7 | 0.000  | 2.391  | P | 1301.295  | P | 799.958   | P | 152.506   | LOC_Os11g38720.1 |
| DG <sub>HP</sub> | Os034971_01 | S7 | 0.736  | 0.000  | P | 2786.374  | P | 4640.282  | P | 1781.033  | LOC_Os01g56040.1 |
| DG <sub>HP</sub> | Os035044_01 | S7 | 0.000  | -3.200 | P | 307.893   | P | 288.185   | P | 2649.186  | LOC_Os05g15920.1 |
| DG <sub>HP</sub> | Os035077_01 | S7 | 0.000  | -1.712 | P | 367.200   | P | 366.229   | P | 1199.870  | LOC_Os10g30690.1 |
| DG <sub>HP</sub> | Os035128_01 | S7 | 1.068  | 0.000  | P | 209.243   | P | 438.708   | P | 239.290   | LOC_Os05g46060.1 |
| DG <sub>HP</sub> | Os035182_01 | S7 | -0.922 | 0.000  | P | 1912.353  | P | 1009.115  | P | 1340.808  | LOC_Os01g08200.1 |
| DG <sub>HP</sub> | Os035205_01 | S7 | 0.936  | 0.000  | P | 7003.911  | P | 13397.472 | P | 9530.806  | LOC_Os07g12720.1 |
| DG <sub>HP</sub> | Os035328_01 | S7 | 0.843  | 0.000  | P | 9986.336  | P | 17916.090 | P | 8135.661  | LOC_Os06g50980.1 |
| DG <sub>HP</sub> | Os035342_01 | S7 | -1.711 | 0.000  | P | 1072.365  | P | 327.456   | P | 326.414   | LOC_Os12g21870.1 |
| DG <sub>HP</sub> | Os035490_01 | S7 | -0.852 | 0.000  | P | 777.138   | P | 430.634   | P | 465.607   | LOC_Os12g04424.2 |
| DG <sub>HP</sub> | Os035558_01 | S7 | -1.042 | 0.000  | P | 7213.652  | P | 3502.142  | P | 8611.043  | LOC_Os06g47360.1 |
| DG <sub>HP</sub> | Os035573_01 | S7 | -0.916 | 0.000  | P | 305.708   | P | 162.042   | P | 147.780   | LOC_Os02g40610.1 |
| DG <sub>HP</sub> | Os035826_01 | S7 | 0.000  | -1.748 | P | 441.956   | P | 512.166   | P | 1720.130  | -                |
| DG <sub>HP</sub> | Os035905_01 | S7 | 0.000  | -1.644 | A | 179.231   | P | 191.618   | P | 598.912   | LOC_Os11g39020.1 |
| DG <sub>HP</sub> | Os035987_01 | S7 | 1.507  | 0.000  | P | 114.923   | P | 326.669   | P | 418.469   | LOC_Os08g44110.1 |

|                  |             |    |        |        |   |           |   |           |   |           |                  |
|------------------|-------------|----|--------|--------|---|-----------|---|-----------|---|-----------|------------------|
| DG <sub>HP</sub> | Os036068_01 | S7 | 0.000  | 1.984  | P | 1355.299  | P | 1661.245  | P | 419.956   | LOC_Os12g07490.1 |
| DG <sub>HP</sub> | Os036341_01 | S7 | -0.939 | 0.000  | P | 501.061   | P | 261.298   | A | 44.692    | LOC_Os07g05510.1 |
| DG <sub>HP</sub> | Os036348_01 | S7 | 0.000  | -1.696 | P | 1372.813  | P | 821.587   | P | 2661.902  | LOC_Os12g14450.1 |
| DG <sub>HP</sub> | Os036475_01 | S7 | 0.000  | 1.681  | P | 211.679   | P | 301.981   | P | 94.191    | LOC_Os03g08530.1 |
| DG <sub>HP</sub> | Os036618_01 | S7 | -1.167 | -2.546 | P | 1299.993  | P | 579.051   | P | 3380.930  | LOC_Os04g33830.1 |
| DG <sub>HP</sub> | Os036667_01 | S7 | 0.902  | 0.000  | P | 10419.138 | P | 19476.243 | P | 11456.906 | LOC_Os06g08500.1 |
| DG <sub>HP</sub> | Os037041_01 | S7 | 0.000  | 2.307  | P | 1423.806  | P | 983.201   | P | 198.639   | -                |
| DG <sub>HP</sub> | Os037049_01 | S7 | -1.106 | -1.531 | P | 1059.506  | P | 492.280   | P | 1422.948  | LOC_Os08g17980.1 |
| DG <sub>HP</sub> | Os037099_01 | S7 | 0.874  | 0.000  | P | 5024.746  | P | 9207.879  | P | 4403.780  | LOC_Os04g42530.1 |
| DG <sub>HP</sub> | Os037112_01 | S7 | 0.000  | -1.484 | P | 318.744   | P | 288.628   | P | 807.248   | LOC_Os11g01360.1 |
| DG <sub>HP</sub> | Os037162_01 | S7 | 0.000  | 2.046  | P | 497.853   | P | 628.728   | P | 152.219   | LOC_Os04g28120.1 |
| DG <sub>HP</sub> | Os037211_01 | S7 | 0.730  | 0.000  | P | 1033.848  | P | 1714.540  | P | 1041.623  | LOC_Os09g03580.1 |
| DG <sub>HP</sub> | Os037237_01 | S7 | -0.892 | 0.000  | P | 1069.670  | P | 576.282   | P | 493.551   | LOC_Os01g04470.1 |
| DG <sub>HP</sub> | Os037668_01 | S7 | 0.724  | 0.000  | P | 4235.256  | P | 6997.747  | P | 4946.118  | LOC_Os04g40120.1 |
| DG <sub>HP</sub> | Os037732_01 | S7 | 1.877  | 0.000  | P | 158.107   | P | 580.834   | P | 448.665   | LOC_Os01g10590.1 |
| DG <sub>HP</sub> | Os037857_01 | S7 | 0.000  | 2.617  | P | 7827.502  | P | 7909.976  | P | 1289.162  | LOC_Os01g42234.1 |
| DG <sub>HP</sub> | Os037985_01 | S7 | -1.987 | -1.710 | P | 12507.388 | P | 3155.151  | P | 10321.336 | LOC_Os12g10580.1 |
| DG <sub>HP</sub> | Os038150_01 | S7 | 0.000  | -1.724 | P | 299.794   | P | 208.957   | P | 690.136   | LOC_Os06g20710.1 |
| DG <sub>HP</sub> | Os038339_01 | S7 | 0.725  | 0.000  | P | 128.354   | P | 212.140   | P | 154.007   | LOC_Os03g49840.1 |
| DG <sub>HP</sub> | Os038408_01 | S7 | -1.721 | 0.000  | P | 7476.677  | P | 2267.848  | P | 2674.603  | LOC_Os09g25700.1 |
| DG <sub>HP</sub> | Os038439_01 | S7 | 0.000  | 1.498  | P | 383.201   | P | 427.568   | P | 151.403   | LOC_Os05g50390.1 |
| DG <sub>HP</sub> | Os038961_01 | S7 | -1.102 | 0.000  | P | 1361.908  | P | 634.329   | P | 342.214   | LOC_Os03g46560.1 |
| DG <sub>HP</sub> | Os039064_01 | S7 | 0.000  | 1.582  | P | 623.128   | P | 578.558   | P | 193.222   | LOC_Os03g12230.1 |
| DG <sub>HP</sub> | Os039127_01 | S7 | 0.000  | 1.903  | P | 445.112   | P | 549.984   | P | 147.080   | LOC_Os01g48170.1 |
| DG <sub>HP</sub> | Os039406_01 | S7 | 0.833  | 0.000  | P | 173.313   | P | 308.781   | P | 187.247   | LOC_Os03g20680.1 |
| DG <sub>HP</sub> | Os039503_01 | S7 | 0.000  | -1.406 | P | 176.634   | P | 225.974   | P | 599.004   | -                |
| DG <sub>HP</sub> | Os039702_01 | S7 | -0.826 | -1.516 | P | 363.297   | P | 204.915   | P | 585.871   | LOC_Os11g25300.1 |
| DG <sub>HP</sub> | Os040088_01 | S7 | -0.828 | 0.000  | P | 1208.374  | P | 680.753   | P | 766.627   | -                |
| DG <sub>HP</sub> | Os040337_01 | S7 | 0.905  | 1.561  | P | 280.984   | P | 526.206   | P | 178.354   | -                |
| DG <sub>HP</sub> | Os040346_01 | S7 | -0.786 | 0.000  | P | 415.143   | P | 240.844   | P | 572.696   | LOC_Os01g46210.1 |
| DG <sub>HP</sub> | Os040497_01 | S7 | -1.066 | 0.000  | P | 525.689   | P | 251.095   | P | 175.123   | LOC_Os12g41420.1 |



|                  |             |    |        |        |   |           |   |           |   |           |                  |
|------------------|-------------|----|--------|--------|---|-----------|---|-----------|---|-----------|------------------|
| DG <sub>HP</sub> | Os040589_01 | S7 | 0.000  | -1.561 | P | 415.237   | P | 321.025   | P | 946.981   | LOC_Os03g17070.1 |
| DG <sub>HP</sub> | Os040591_01 | S7 | 0.000  | -1.448 | A | 117.117   | P | 147.896   | P | 403.629   | LOC_Os03g08380.1 |
| DG <sub>HP</sub> | Os040593_01 | S7 | 0.000  | 1.589  | P | 1064.994  | P | 738.446   | P | 245.438   | LOC_Os01g34614.1 |
| DG <sub>HP</sub> | Os040743_01 | S7 | 0.000  | 1.903  | P | 900.911   | P | 534.409   | P | 142.868   | LOC_Os07g05510.1 |
| DG <sub>HP</sub> | Os040834_01 | S7 | 0.760  | 0.000  | P | 3662.756  | P | 6201.290  | P | 3523.019  | LOC_Os11g01260.1 |
| DG <sub>HP</sub> | Os040991_01 | S7 | 0.826  | 0.000  | P | 12517.626 | P | 22186.318 | P | 10873.089 | -                |
| DG <sub>HP</sub> | Os041080_01 | S7 | 0.772  | 0.000  | P | 4720.505  | P | 8061.607  | P | 3567.106  | LOC_Os03g19830.1 |
| DG <sub>HP</sub> | Os041081_01 | S7 | 0.000  | 1.754  | A | 613.151   | P | 520.487   | P | 154.286   | -                |
| DG <sub>HP</sub> | Os041334_01 | S7 | 1.343  | 0.000  | P | 160.892   | P | 408.171   | P | 212.416   | LOC_Os01g13920.1 |
| DG <sub>HP</sub> | Os041337_01 | S7 | 0.000  | 1.774  | P | 758.797   | P | 1015.515  | P | 296.860   | LOC_Os04g05490.1 |
| DG <sub>HP</sub> | Os042492_01 | S7 | -0.922 | 0.000  | P | 1831.974  | P | 967.025   | P | 1695.243  | -                |
| DG <sub>HP</sub> | Os042866_01 | S7 | -1.414 | 0.000  | P | 2037.558  | P | 764.723   | P | 334.493   | LOC_Os10g05820.1 |
| DG <sub>HP</sub> | Os043044_01 | S7 | 0.745  | 0.000  | P | 1087.828  | P | 1823.247  | P | 1203.620  | LOC_Os06g30030.1 |
| DG <sub>HP</sub> | Os043604_01 | S7 | 0.923  | 0.000  | P | 713.714   | P | 1353.062  | P | 647.083   | LOC_Os05g20030.1 |
| DG <sub>HP</sub> | Os043740_01 | S7 | -1.252 | 0.000  | P | 2775.095  | P | 1165.046  | P | 2687.506  | LOC_Os04g11956.1 |
| DG <sub>HP</sub> | Os043891_01 | S7 | 0.000  | 1.584  | P | 793.912   | P | 942.129   | P | 314.199   | LOC_Os06g44910.1 |
| DG <sub>HP</sub> | Os043937_01 | S7 | 0.884  | 0.000  | P | 178.656   | P | 329.693   | P | 171.244   | LOC_Os06g29580.1 |
| DG <sub>HP</sub> | Os043992_01 | S7 | -0.932 | 0.000  | P | 393.899   | P | 206.421   | P | 131.918   | LOC_Os06g16000.1 |
| DG <sub>HP</sub> | Os044015_01 | S7 | 1.040  | 0.000  | P | 112.265   | P | 230.780   | A | 98.268    | -                |
| DG <sub>HP</sub> | Os044300_01 | S7 | -0.946 | 0.000  | P | 2796.805  | P | 1451.286  | P | 1626.258  | LOC_Os05g11320.1 |
| DG <sub>HP</sub> | Os044441_01 | S7 | 1.142  | 0.000  | P | 122.889   | P | 271.294   | P | 176.744   | LOC_Os12g41790.1 |
| DG <sub>HP</sub> | Os044467_01 | S7 | 0.000  | -1.642 | P | 211.940   | P | 211.007   | P | 658.508   | LOC_Os03g63310.1 |
| DG <sub>HP</sub> | Os044617_01 | S7 | 1.033  | 0.000  | P | 2836.121  | P | 5802.960  | P | 3099.138  | -                |
| DG <sub>HP</sub> | Os044853_01 | S7 | 0.000  | -2.214 | P | 216.515   | P | 312.416   | P | 1449.789  | LOC_Os02g13620.1 |
| DG <sub>HP</sub> | Os045253_01 | S7 | 0.000  | -1.441 | A | 110.868   | P | 122.101   | P | 331.587   | -                |
| DG <sub>HP</sub> | Os045347_01 | S7 | 0.000  | -2.135 | P | 190.934   | P | 279.136   | P | 1225.967  | LOC_Os06g18120.1 |
| DG <sub>HP</sub> | Os045398_01 | S7 | 0.846  | 0.000  | P | 1067.149  | P | 1918.613  | P | 959.517   | LOC_Os12g25450.1 |
| DG <sub>HP</sub> | Os045461_01 | S7 | 0.000  | -2.423 | P | 689.914   | P | 428.184   | P | 2295.518  | LOC_Os05g48630.2 |
| DG <sub>HP</sub> | Os045558_01 | S7 | -0.894 | 0.000  | P | 461.420   | P | 248.281   | P | 220.396   | LOC_Os07g34370.1 |
| DG <sub>HP</sub> | Os045565_01 | S7 | 1.024  | -1.514 | P | 169.472   | P | 344.620   | P | 984.039   | LOC_Os10g09630.1 |
| DG <sub>HP</sub> | Os045632_01 | S7 | -1.008 | 0.000  | P | 6474.088  | P | 3219.421  | P | 5329.558  | LOC_Os07g18070.1 |

|                  |             |    |        |        |   |          |   |           |   |          |                  |
|------------------|-------------|----|--------|--------|---|----------|---|-----------|---|----------|------------------|
| DG <sub>HP</sub> | Os045859_01 | S7 | 0.000  | -2.142 | A | 91.336   | P | 140.121   | P | 618.263  | LOC_Os12g28177.1 |
| DG <sub>HP</sub> | Os046493_01 | S7 | 0.000  | -1.391 | P | 167.819  | P | 216.202   | P | 566.879  | LOC_Os11g39640.1 |
| DG <sub>HP</sub> | Os046577_01 | S7 | 0.000  | -2.016 | P | 1646.116 | P | 1943.425  | P | 7858.466 | -                |
| DG <sub>HP</sub> | Os046675_01 | S7 | 1.033  | 0.000  | P | 223.772  | P | 457.907   | P | 170.863  | LOC_Os11g39020.1 |
| DG <sub>HP</sub> | Os046837_01 | S7 | -0.965 | 0.000  | P | 530.604  | P | 271.819   | P | 237.798  | LOC_Os06g46650.1 |
| DG <sub>HP</sub> | Os046888_01 | S7 | 0.000  | -1.804 | P | 761.626  | P | 863.487   | P | 3015.609 | LOC_Os03g25460.1 |
| DG <sub>HP</sub> | Os047258_01 | S7 | 0.000  | -1.395 | P | 462.797  | P | 395.470   | P | 1040.217 | LOC_Os03g37290.1 |
| DG <sub>HP</sub> | Os047467_01 | S7 | 0.000  | -2.198 | P | 705.619  | P | 860.211   | P | 3946.266 | LOC_Os08g05160.1 |
| DG <sub>HP</sub> | Os047586_01 | S7 | 0.000  | -1.451 | P | 149.686  | P | 170.364   | P | 465.784  | LOC_Os11g24230.1 |
| DG <sub>HP</sub> | Os047694_01 | S7 | -0.972 | 0.000  | P | 276.638  | P | 140.991   | A | 123.844  | LOC_Os04g30540.1 |
| DG <sub>HP</sub> | Os047874_01 | S7 | 0.000  | -1.645 | P | 1148.324 | P | 690.674   | P | 2159.483 | LOC_Os12g36860.1 |
| DG <sub>HP</sub> | Os048007_01 | S7 | 0.752  | 0.000  | P | 883.333  | P | 1487.875  | P | 618.742  | LOC_Os11g42050.1 |
| DG <sub>HP</sub> | Os048058_01 | S7 | 0.941  | 0.000  | P | 6090.055 | P | 11692.110 | P | 5762.127 | LOC_Os11g18000.1 |
| DG <sub>HP</sub> | Os048353_01 | S7 | 0.866  | 0.000  | P | 159.935  | P | 291.592   | P | 193.619  | LOC_Os04g57400.1 |
| DG <sub>HP</sub> | Os048485_01 | S7 | 0.992  | 0.000  | P | 2339.906 | P | 4654.070  | P | 2419.894 | LOC_Os01g08620.1 |
| DG <sub>HP</sub> | Os048490_01 | S7 | -1.693 | 0.000  | P | 4871.474 | P | 1506.698  | P | 2229.258 | -                |
| DG <sub>HP</sub> | Os048518_01 | S7 | 0.825  | 0.000  | P | 6654.895 | P | 11787.928 | P | 5804.813 | LOC_Os09g39000.1 |
| DG <sub>HP</sub> | Os048525_01 | S7 | -1.237 | -1.693 | P | 1408.192 | P | 597.589   | P | 1932.151 | LOC_Os07g14750.1 |
| DG <sub>HP</sub> | Os048668_01 | S7 | -1.822 | 0.000  | P | 1777.786 | P | 502.762   | P | 588.895  | LOC_Os06g43740.1 |
| DG <sub>HP</sub> | Os048713_01 | S7 | -0.970 | 0.000  | P | 382.862  | P | 195.520   | P | 414.664  | LOC_Os11g27090.1 |
| DG <sub>HP</sub> | Os048749_01 | S7 | 0.795  | 0.000  | P | 1092.775 | P | 1895.666  | P | 1326.063 | LOC_Os12g07560.1 |
| DG <sub>HP</sub> | Os048781_01 | S7 | 1.147  | 0.000  | P | 134.579  | P | 298.038   | P | 418.796  | -                |
| DG <sub>HP</sub> | Os049190_01 | S7 | 0.881  | 0.000  | P | 128.549  | P | 236.701   | P | 289.597  | LOC_Os07g10850.1 |
| DG <sub>HP</sub> | Os049394_01 | S7 | 0.723  | 0.000  | P | 153.069  | P | 252.680   | P | 306.453  | LOC_Os11g39760.1 |
| DG <sub>HP</sub> | Os049499_01 | S7 | -1.682 | 0.000  | P | 2114.017 | P | 658.892   | P | 634.524  | LOC_Os05g27000.1 |
| DG <sub>HP</sub> | Os049505_01 | S7 | 0.962  | 0.000  | P | 186.306  | P | 362.932   | P | 370.399  | LOC_Os10g25250.1 |
| DG <sub>HP</sub> | Os049578_01 | S7 | 0.821  | 0.000  | P | 397.089  | P | 701.465   | P | 504.721  | LOC_Os12g29820.1 |
| DG <sub>HP</sub> | Os049591_01 | S7 | 0.000  | 2.078  | P | 1272.594 | P | 1724.672  | P | 408.601  | LOC_Os10g04500.1 |
| DG <sub>HP</sub> | Os049802_01 | S7 | -1.175 | 0.000  | P | 428.942  | P | 189.974   | P | 239.597  | -                |
| DG <sub>HP</sub> | Os050009_01 | S7 | 1.053  | 0.000  | P | 217.088  | P | 450.321   | P | 238.771  | LOC_Os05g46160.1 |
| DG <sub>HP</sub> | Os050487_01 | S7 | 1.035  | 0.000  | P | 622.094  | P | 1274.670  | P | 459.063  | -                |

|                  |             |    |        |        |   |           |   |           |   |           |                  |
|------------------|-------------|----|--------|--------|---|-----------|---|-----------|---|-----------|------------------|
| DG <sub>HP</sub> | Os050541_01 | S7 | 0.000  | -1.621 | P | 172.683   | P | 209.566   | P | 644.526   | LOC_Os12g31390.1 |
| DG <sub>HP</sub> | Os050700_01 | S7 | -1.099 | -1.667 | P | 23630.680 | P | 11029.006 | P | 35030.463 | LOC_Os10g21280.1 |
| DG <sub>HP</sub> | Os050836_01 | S7 | 0.746  | 0.000  | P | 5470.084  | P | 9175.003  | P | 4859.940  | LOC_Os05g14230.1 |
| DG <sub>HP</sub> | Os050879_01 | S7 | 1.239  | 0.000  | P | 129.509   | P | 305.711   | P | 117.291   | LOC_Os05g30470.1 |
| DG <sub>HP</sub> | Os050925_01 | S7 | 0.000  | -2.754 | P | 217.502   | P | 357.996   | P | 2414.344  | LOC_Os01g61840.1 |
| DG <sub>HP</sub> | Os051138_01 | S7 | -0.990 | 0.000  | P | 1360.095  | P | 684.559   | P | 592.564   | LOC_Os01g63830.1 |
| DG <sub>HP</sub> | Os051250_01 | S7 | 0.975  | -1.701 | P | 192.467   | P | 378.437   | P | 1230.215  | -                |
| DG <sub>HP</sub> | Os051609_01 | S7 | 0.812  | 0.000  | P | 190.603   | P | 334.619   | P | 174.409   | -                |
| DG <sub>HP</sub> | Os051842_01 | S7 | 0.830  | 0.000  | P | 8620.273  | P | 15321.174 | P | 7033.106  | LOC_Os09g21140.1 |
| DG <sub>HP</sub> | Os051892_01 | S7 | 0.000  | -1.431 | P | 24173.042 | P | 16316.900 | P | 43998.970 | LOC_Os08g15149.1 |
| DG <sub>HP</sub> | Os051896_01 | S7 | 1.135  | 0.000  | P | 12117.279 | P | 26620.613 | P | 14023.130 | LOC_Os07g11410.1 |
| DG <sub>HP</sub> | Os051935_01 | S7 | 0.000  | -3.831 | P | 967.786   | P | 999.077   | P | 14215.834 | LOC_Os01g15270.1 |
| DG <sub>HP</sub> | Os051948_01 | S7 | -0.918 | 0.000  | P | 758.460   | P | 401.281   | P | 689.361   | LOC_Os11g06720.1 |
| DG <sub>HP</sub> | Os051949_01 | S7 | 1.110  | 0.000  | P | 6156.702  | P | 13286.531 | P | 7422.592  | LOC_Os06g31070.1 |
| DG <sub>HP</sub> | Os051956_01 | S7 | -1.181 | -1.482 | P | 2020.787  | P | 891.507   | P | 2490.618  | LOC_Os07g37240.1 |
| DG <sub>HP</sub> | Os051959_01 | S7 | -1.251 | -1.872 | P | 3761.772  | P | 1580.215  | P | 5782.847  | LOC_Os02g02400.1 |
| DG <sub>HP</sub> | Os051962_01 | S7 | 0.000  | -2.386 | P | 429.622   | P | 312.333   | P | 1632.140  | LOC_Os02g26700.1 |
| DG <sub>HP</sub> | Os051968_01 | S7 | 0.000  | -2.146 | P | 289.607   | P | 227.963   | P | 1009.188  | LOC_Os03g08500.1 |
| DG <sub>HP</sub> | Os051970_01 | S7 | 0.000  | 1.547  | P | 2250.607  | P | 2153.478  | P | 736.992   | LOC_Os10g33800.1 |
| DG <sub>HP</sub> | Os051973_01 | S7 | 0.000  | -2.182 | P | 349.470   | P | 253.488   | P | 1150.307  | LOC_Os01g45274.1 |
| DG <sub>HP</sub> | Os051974_01 | S7 | 0.000  | -3.044 | P | 131.774   | P | 139.432   | P | 1149.933  | LOC_Os01g03360.1 |
| DG <sub>HP</sub> | Os051978_01 | S7 | 0.000  | 3.244  | P | 8267.735  | P | 5307.072  | P | 560.347   | LOC_Os03g28330.4 |
| DG <sub>HP</sub> | Os051980_01 | S7 | -0.829 | 0.000  | P | 788.600   | P | 443.845   | P | 1105.010  | LOC_Os02g27030.1 |
| DG <sub>HP</sub> | Os051981_01 | S7 | 0.000  | -2.244 | P | 1305.158  | P | 982.874   | P | 4656.545  | LOC_Os11g47809.1 |
| DG <sub>HP</sub> | Os051998_01 | S7 | 0.000  | -2.112 | P | 809.017   | P | 547.531   | P | 2367.138  | LOC_Os12g08770.1 |
| DG <sub>HP</sub> | Os052004_01 | S7 | 0.000  | 2.235  | P | 5881.218  | P | 7366.851  | P | 1565.005  | LOC_Os11g09280.2 |
| DG <sub>HP</sub> | Os052018_01 | S7 | -1.101 | -2.299 | P | 1126.538  | P | 525.092   | P | 2583.934  | -                |
| DG <sub>HP</sub> | Os052028_01 | S7 | -1.384 | -2.008 | P | 434.493   | P | 166.477   | P | 669.684   | LOC_Os12g23200.1 |
| DG <sub>HP</sub> | Os052033_01 | S7 | -1.013 | 0.000  | P | 10326.811 | P | 5118.195  | P | 12522.676 | -                |
| DG <sub>HP</sub> | Os052036_01 | S7 | -0.854 | 0.000  | P | 658.022   | P | 364.162   | P | 225.319   | LOC_Os10g40720.1 |
| DG <sub>HP</sub> | Os052043_01 | S7 | 0.000  | -1.446 | P | 258.865   | P | 195.202   | P | 531.676   | LOC_Os07g42370.2 |

|                  |             |    |        |        |   |           |   |           |   |          |                  |
|------------------|-------------|----|--------|--------|---|-----------|---|-----------|---|----------|------------------|
| DG <sub>HP</sub> | Os052050_01 | S7 | -1.319 | 0.000  | P | 5748.068  | P | 2304.296  | P | 2579.002 | LOC_Os01g64960.1 |
| DG <sub>HP</sub> | Os052069_01 | S7 | 0.755  | 2.150  | P | 1419.356  | P | 2395.422  | P | 539.543  | LOC_Os05g02060.1 |
| DG <sub>HP</sub> | Os052079_01 | S7 | 0.000  | 1.512  | P | 808.223   | P | 879.560   | P | 308.317  | LOC_Os06g50300.1 |
| DG <sub>HP</sub> | Os052085_01 | S7 | -0.797 | -2.227 | P | 797.417   | P | 458.976   | P | 2149.041 | LOC_Os07g25430.3 |
| DG <sub>HP</sub> | Os052088_01 | S7 | -1.704 | 0.000  | P | 819.660   | P | 251.622   | P | 189.071  | LOC_Os03g14630.1 |
| DG <sub>HP</sub> | Os052095_01 | S7 | -0.896 | 0.000  | P | 927.176   | P | 498.409   | P | 673.807  | LOC_Os03g12290.1 |
| DG <sub>HP</sub> | Os052111_01 | S7 | 0.000  | -2.045 | P | 305.276   | P | 435.141   | P | 1795.964 | LOC_Os09g31482.3 |
| DG <sub>HP</sub> | Os052124_01 | S7 | 0.896  | 0.000  | P | 342.340   | P | 637.274   | P | 243.954  | LOC_Os08g08970.1 |
| DG <sub>HP</sub> | Os052126_01 | S7 | -1.022 | 0.000  | P | 792.304   | P | 390.105   | P | 696.243  | LOC_Os08g41950.2 |
| DG <sub>HP</sub> | Os052167_01 | S7 | 0.000  | -1.519 | P | 297.110   | P | 278.170   | P | 797.448  | -                |
| DG <sub>HP</sub> | Os052203_01 | S7 | 0.753  | 0.000  | P | 301.865   | P | 508.586   | P | 831.403  | LOC_Os03g07480.2 |
| DG <sub>HP</sub> | Os052210_01 | S7 | 0.000  | 1.750  | P | 1549.583  | P | 1306.386  | P | 388.424  | LOC_Os05g28280.1 |
| DG <sub>HP</sub> | Os052257_01 | S7 | 0.000  | 1.760  | P | 981.985   | P | 1015.006  | P | 299.781  | LOC_Os03g64210.1 |
| DG <sub>HP</sub> | Os052280_01 | S7 | 0.000  | 1.732  | P | 4557.333  | P | 3080.123  | P | 927.089  | LOC_Os03g29260.2 |
| DG <sub>HP</sub> | Os052285_01 | S7 | -0.811 | 0.000  | P | 3318.931  | P | 1891.244  | P | 944.012  | LOC_Os03g01270.1 |
| DG <sub>HP</sub> | Os052287_01 | S7 | 0.000  | 1.763  | P | 2339.851  | P | 3336.873  | P | 983.343  | LOC_Os05g34510.1 |
| DG <sub>HP</sub> | Os052307_01 | S7 | 0.000  | 2.736  | P | 23835.891 | P | 26090.087 | P | 3917.146 | LOC_Os03g31750.1 |
| DG <sub>HP</sub> | Os052328_01 | S7 | 0.000  | 1.512  | P | 722.585   | P | 535.422   | P | 187.692  | LOC_Os03g26970.1 |
| DG <sub>HP</sub> | Os052389_01 | S7 | 0.815  | 0.000  | P | 467.116   | P | 821.730   | P | 670.376  | LOC_Os03g29740.1 |
| DG <sub>HP</sub> | Os052396_01 | S7 | 0.000  | 1.579  | P | 2108.669  | P | 2145.629  | P | 718.057  | LOC_Os05g01290.1 |
| DG <sub>HP</sub> | Os052424_01 | S7 | 0.000  | 1.547  | P | 495.675   | P | 545.144   | P | 186.562  | LOC_Os12g13380.1 |
| DG <sub>HP</sub> | Os052485_01 | S7 | 0.000  | 1.831  | P | 606.205   | P | 536.269   | P | 150.741  | LOC_Os04g33590.1 |
| DG <sub>HP</sub> | Os052554_01 | S7 | 0.000  | -1.435 | P | 294.228   | P | 255.814   | P | 691.857  | LOC_Os04g40600.1 |
| DG <sub>HP</sub> | Os052654_01 | S7 | 0.000  | -1.499 | P | 203.381   | P | 194.558   | P | 549.929  | LOC_Os07g09970.1 |
| DG <sub>HP</sub> | Os052664_01 | S7 | 0.000  | -1.372 | P | 281.501   | P | 272.655   | P | 705.857  | LOC_Os03g14570.2 |
| DG <sub>HP</sub> | Os052782_02 | S7 | 0.000  | -4.141 | P | 283.893   | P | 356.146   | P | 6281.370 | -                |
| DG <sub>HP</sub> | Os052819_01 | S7 | 1.150  | -2.369 | P | 162.315   | P | 360.143   | P | 1860.656 | -                |
| DG <sub>HP</sub> | Os052906_01 | S7 | 0.000  | -1.517 | P | 191.979   | P | 189.755   | P | 543.014  | LOC_Os09g21740.1 |
| DG <sub>HP</sub> | Os052960_01 | S7 | -0.861 | 0.000  | P | 412.481   | P | 227.142   | P | 331.077  | LOC_Os01g12110.2 |
| DG <sub>HP</sub> | Os053043_01 | S7 | 0.926  | 0.000  | P | 117.237   | P | 222.827   | P | 198.939  | LOC_Os05g39250.1 |
| DG <sub>HP</sub> | Os053139_01 | S7 | 1.308  | 0.000  | P | 6944.286  | P | 17194.662 | P | 9059.082 | LOC_Os06g31060.1 |

|                  |             |    |        |        |   |           |   |           |   |           |                  |
|------------------|-------------|----|--------|--------|---|-----------|---|-----------|---|-----------|------------------|
| DG <sub>HP</sub> | Os053243_01 | S7 | 0.821  | 0.000  | P | 261.429   | P | 461.945   | P | 509.598   | LOC_Os12g20310.1 |
| DG <sub>HP</sub> | Os053270_01 | S7 | -0.932 | 0.000  | P | 1344.335  | P | 704.620   | P | 1051.449  | LOC_Os01g03290.1 |
| DG <sub>HP</sub> | Os053316_01 | S7 | 0.000  | -1.452 | P | 173.361   | P | 209.576   | P | 573.519   | LOC_Os01g71690.1 |
| DG <sub>HP</sub> | Os053687_01 | S7 | 0.000  | -1.495 | P | 1140.949  | P | 796.383   | P | 2245.045  | LOC_Os02g55400.1 |
| DG <sub>HP</sub> | Os053817_01 | S7 | 0.812  | 0.000  | P | 247.403   | P | 434.432   | P | 594.935   | -                |
| DG <sub>HP</sub> | Os054002_01 | S7 | 0.820  | 0.000  | P | 3848.571  | P | 6792.339  | P | 2574.469  | LOC_Os01g23790.1 |
| DG <sub>HP</sub> | Os054176_02 | S7 | 0.000  | 1.586  | P | 2469.234  | P | 2167.828  | P | 722.205   | -                |
| DG <sub>HP</sub> | Os054362_01 | S7 | 1.412  | 0.000  | P | 9415.547  | P | 25053.708 | P | 28134.379 | LOC_Os05g26350.1 |
| DG <sub>HP</sub> | Os054366_01 | S7 | -1.575 | -1.979 | P | 5576.455  | P | 1872.097  | P | 7382.008  | LOC_Os12g19381.1 |
| DG <sub>HP</sub> | Os054368_01 | S7 | -0.902 | -2.203 | P | 19824.202 | P | 10608.475 | P | 48860.028 | LOC_Os12g19394.1 |
| DG <sub>HP</sub> | Os054371_01 | S7 | 0.971  | 0.000  | P | 4217.595  | P | 8268.539  | P | 6075.684  | LOC_Os02g15070.1 |
| DG <sub>HP</sub> | Os054376_01 | S7 | 1.250  | 0.000  | P | 14408.411 | P | 34273.979 | P | 32607.421 | LOC_Os10g26060.1 |
| DG <sub>HP</sub> | Os054377_01 | S7 | 0.000  | -1.504 | P | 276.054   | P | 377.099   | P | 1069.773  | LOC_Os05g31140.1 |
| DG <sub>HP</sub> | Os054395_01 | S7 | -0.966 | 0.000  | P | 657.521   | P | 336.695   | P | 458.940   | LOC_Os02g41650.2 |
| DG <sub>HP</sub> | Os054419_01 | S7 | -1.343 | -2.863 | P | 1093.950  | P | 431.275   | P | 3137.910  | LOC_Os01g31690.1 |
| DG <sub>HP</sub> | Os054431_01 | S7 | 0.000  | -2.003 | P | 1373.088  | P | 1283.293  | P | 5142.145  | LOC_Os12g38064.1 |
| DG <sub>HP</sub> | Os054436_01 | S7 | 0.825  | -2.070 | P | 489.141   | P | 866.797   | P | 3639.737  | LOC_Os09g39780.2 |
| DG <sub>HP</sub> | Os054446_01 | S7 | 0.000  | -1.636 | P | 402.444   | P | 329.805   | P | 1024.750  | LOC_Os07g01760.1 |
| DG <sub>HP</sub> | Os054452_01 | S7 | -1.512 | -2.226 | P | 863.822   | P | 302.982   | P | 1417.103  | LOC_Os07g04840.1 |
| DG <sub>HP</sub> | Os054455_01 | S7 | 0.000  | 1.511  | P | 3849.198  | P | 3424.180  | P | 1201.467  | LOC_Os08g03640.1 |
| DG <sub>HP</sub> | Os054458_01 | S7 | 0.000  | 1.654  | P | 2663.745  | P | 2851.059  | P | 905.762   | LOC_Os12g05050.1 |
| DG <sub>HP</sub> | Os054459_01 | S7 | -1.392 | -2.079 | P | 1225.726  | P | 466.918   | P | 1973.432  | LOC_Os08g10020.2 |
| DG <sub>HP</sub> | Os054477_01 | S7 | 0.000  | 1.987  | P | 7372.988  | P | 6432.810  | P | 1622.860  | LOC_Os04g46200.1 |
| DG <sub>HP</sub> | Os054478_01 | S7 | 0.000  | 1.515  | P | 3803.449  | P | 2994.472  | P | 1047.675  | LOC_Os10g41410.2 |
| DG <sub>HP</sub> | Os054485_01 | S7 | 0.000  | -1.654 | P | 245.701   | P | 251.244   | P | 790.930   | LOC_Os10g39130.1 |
| DG <sub>HP</sub> | Os054491_01 | S7 | 0.000  | -1.603 | P | 338.926   | P | 311.525   | P | 946.202   | -                |
| DG <sub>HP</sub> | Os054509_01 | S7 | -0.892 | -1.988 | P | 394.343   | P | 212.563   | P | 842.938   | LOC_Os02g47020.1 |
| DG <sub>HP</sub> | Os054518_01 | S7 | 0.000  | -1.979 | P | 547.808   | P | 422.859   | P | 1666.811  | LOC_Os04g16680.1 |
| DG <sub>HP</sub> | Os054522_01 | S7 | 0.000  | 1.928  | P | 8444.469  | P | 12390.939 | P | 3255.302  | LOC_Os02g15090.1 |
| DG <sub>HP</sub> | Os054533_01 | S7 | 0.000  | -1.787 | P | 776.388   | P | 486.838   | P | 1680.548  | LOC_Os03g56670.2 |
| DG <sub>HP</sub> | Os054538_01 | S7 | 0.000  | 2.069  | P | 17492.436 | P | 21924.075 | P | 5223.507  | LOC_Os05g33570.1 |

|                  |             |    |        |        |   |           |   |           |   |          |                  |
|------------------|-------------|----|--------|--------|---|-----------|---|-----------|---|----------|------------------|
| DG <sub>HP</sub> | Os054539_01 | S7 | 0.000  | -1.877 | P | 1917.313  | P | 1305.018  | P | 4794.652 | LOC_Os09g30340.1 |
| DG <sub>HP</sub> | Os054558_01 | S7 | 0.000  | 1.938  | P | 6599.956  | P | 10276.372 | P | 2681.379 | LOC_Os02g32660.1 |
| DG <sub>HP</sub> | Os054559_01 | S7 | 0.000  | 1.745  | P | 2448.730  | P | 3056.061  | P | 911.590  | LOC_Os02g32660.1 |
| DG <sub>HP</sub> | Os054562_01 | S7 | 0.000  | -2.464 | P | 251.857   | P | 310.493   | P | 1713.545 | LOC_Os01g21250.1 |
| DG <sub>HP</sub> | Os054570_01 | S7 | 0.000  | -2.159 | P | 2017.011  | P | 1722.837  | P | 7695.336 | LOC_Os12g36880.1 |
| DG <sub>HP</sub> | Os054571_01 | S7 | -0.873 | 2.139  | P | 15874.791 | P | 8670.557  | P | 1967.984 | LOC_Os08g08960.1 |
| DG <sub>HP</sub> | Os054578_01 | S7 | 0.000  | -2.619 | P | 414.139   | P | 458.257   | P | 2816.096 | LOC_Os02g39630.2 |
| DG <sub>HP</sub> | Os054580_01 | S7 | 0.728  | 0.000  | P | 2300.309  | P | 3808.916  | P | 2415.051 | LOC_Os10g32720.1 |
| DG <sub>HP</sub> | Os054583_01 | S7 | -0.999 | 0.000  | P | 441.460   | P | 220.911   | P | 364.235  | LOC_Os06g04270.1 |
| DG <sub>HP</sub> | Os054595_01 | S7 | 0.000  | 1.536  | P | 3024.637  | P | 2500.594  | P | 862.511  | LOC_Os04g32950.1 |
| DG <sub>HP</sub> | Os054602_01 | S7 | 0.000  | -2.536 | P | 118.163   | P | 182.111   | P | 1055.918 | LOC_Os08g35190.2 |
| DG <sub>HP</sub> | Os054607_01 | S7 | 0.742  | 0.000  | P | 168.253   | P | 281.354   | P | 261.782  | LOC_Os05g06780.1 |
| DG <sub>HP</sub> | Os054616_01 | S7 | 0.766  | 0.000  | P | 209.995   | P | 357.011   | A | 252.681  | LOC_Os05g23860.1 |
| DG <sub>HP</sub> | Os054627_01 | S7 | 0.000  | -2.749 | P | 193.034   | P | 203.488   | P | 1368.354 | LOC_Os01g73940.1 |
| DG <sub>HP</sub> | Os054630_01 | S7 | 1.526  | 0.000  | P | 957.722   | P | 2758.752  | P | 1314.076 | LOC_Os04g08270.1 |
| DG <sub>HP</sub> | Os054635_01 | S7 | 1.044  | 0.000  | P | 1009.825  | P | 2082.653  | P | 976.255  | LOC_Os02g48480.1 |
| DG <sub>HP</sub> | Os054639_01 | S7 | 0.000  | 1.494  | P | 2837.059  | P | 4184.684  | P | 1485.614 | LOC_Os10g25130.1 |
| DG <sub>HP</sub> | Os054659_01 | S7 | 0.000  | -1.681 | P | 318.948   | P | 339.811   | P | 1089.381 | LOC_Os01g07760.2 |
| DG <sub>HP</sub> | Os054660_01 | S7 | 0.000  | -2.040 | P | 478.643   | P | 437.502   | P | 1799.798 | LOC_Os04g41560.2 |
| DG <sub>HP</sub> | Os054661_02 | S7 | 0.000  | -1.657 | P | 349.561   | P | 205.753   | P | 648.651  | -                |
| DG <sub>HP</sub> | Os054673_01 | S7 | 0.000  | -1.507 | P | 448.826   | P | 461.803   | P | 1312.729 | LOC_Os03g55540.1 |
| DG <sub>HP</sub> | Os054687_01 | S7 | 0.000  | 2.206  | P | 4014.079  | P | 6205.527  | P | 1345.228 | LOC_Os03g55090.1 |
| DG <sub>HP</sub> | Os054699_01 | S7 | 0.000  | -2.171 | P | 465.775   | P | 696.822   | P | 3137.987 | -                |
| DG <sub>HP</sub> | Os054725_01 | S7 | 1.144  | 0.000  | P | 426.495   | P | 942.562   | P | 1349.527 | LOC_Os07g11310.1 |
| DG <sub>HP</sub> | Os054727_01 | S7 | 0.000  | -1.396 | P | 174.678   | P | 197.269   | P | 519.191  | LOC_Os01g61670.1 |
| DG <sub>HP</sub> | Os054745_01 | S7 | 0.000  | -2.377 | P | 862.457   | P | 561.561   | P | 2917.837 | LOC_Os07g37030.1 |
| DG <sub>HP</sub> | Os054746_01 | S7 | 0.763  | 0.000  | P | 240.480   | P | 408.094   | P | 388.474  | LOC_Os10g40780.2 |
| DG <sub>HP</sub> | Os054779_01 | S7 | -0.981 | 0.000  | P | 356.560   | P | 180.639   | P | 221.499  | LOC_Os01g13770.1 |
| DG <sub>HP</sub> | Os054789_01 | S7 | 0.000  | 1.600  | P | 1180.806  | P | 1014.685  | P | 334.629  | LOC_Os05g50380.1 |
| DG <sub>HP</sub> | Os054802_01 | S7 | -0.776 | 0.000  | P | 349.256   | P | 203.911   | P | 286.419  | LOC_Os01g02940.4 |
| DG <sub>HP</sub> | Os054859_01 | S7 | 0.853  | 0.000  | P | 466.043   | P | 841.762   | P | 487.280  | LOC_Os03g07226.2 |

|                  |             |    |        |        |   |           |   |           |   |           |                  |
|------------------|-------------|----|--------|--------|---|-----------|---|-----------|---|-----------|------------------|
| DG <sub>HP</sub> | Os054867_01 | S7 | 0.976  | 0.000  | P | 173.322   | P | 340.851   | P | 321.569   | LOC_Os06g44190.1 |
| DG <sub>HP</sub> | Os054912_01 | S7 | -1.048 | 0.000  | P | 4799.773  | P | 2320.687  | P | 5372.696  | LOC_Os02g44108.1 |
| DG <sub>HP</sub> | Os054914_01 | S7 | 0.000  | 1.810  | P | 1032.878  | P | 1509.663  | P | 430.635   | LOC_Os03g40440.1 |
| DG <sub>HP</sub> | Os054921_01 | S7 | 0.000  | 1.620  | P | 547.418   | P | 473.436   | P | 154.036   | LOC_Os02g06650.1 |
| DG <sub>HP</sub> | Os054939_01 | S7 | 0.738  | 0.000  | P | 218.771   | P | 365.006   | P | 368.440   | LOC_Os01g37560.3 |
| DG <sub>HP</sub> | Os054951_01 | S7 | 0.748  | 0.000  | P | 1520.243  | P | 2553.716  | P | 2087.988  | LOC_Os01g50700.1 |
| DG <sub>HP</sub> | Os055074_01 | S7 | 0.000  | -1.694 | P | 582.430   | P | 724.894   | P | 2345.201  | LOC_Os07g43770.1 |
| DG <sub>HP</sub> | Os055079_01 | S7 | -1.574 | 0.000  | P | 997.561   | P | 334.951   | P | 479.141   | LOC_Os10g43060.1 |
| DG <sub>HP</sub> | Os055090_01 | S7 | 0.822  | 0.000  | P | 274.160   | P | 484.554   | P | 641.809   | LOC_Os01g53700.1 |
| DG <sub>HP</sub> | Os055093_01 | S7 | 0.886  | 1.847  | P | 772.518   | P | 1428.020  | P | 396.917   | LOC_Os04g41980.2 |
| DG <sub>HP</sub> | Os055174_01 | S7 | 0.848  | 1.739  | P | 1032.221  | P | 1857.550  | P | 556.390   | LOC_Os10g29549.1 |
| DG <sub>HP</sub> | Os055308_01 | S7 | 0.000  | -2.159 | P | 419.223   | P | 524.332   | P | 2341.945  | LOC_Os07g48020.1 |
| DG <sub>HP</sub> | Os055322_01 | S7 | 0.000  | 1.571  | P | 4070.745  | P | 4878.670  | P | 1642.144  | -                |
| DG <sub>HP</sub> | Os055328_01 | S7 | 0.788  | 0.000  | P | 491.236   | P | 848.260   | P | 872.716   | LOC_Os03g58980.1 |
| DG <sub>HP</sub> | Os055402_01 | S7 | 0.000  | 1.493  | P | 373.458   | P | 512.868   | P | 182.203   | LOC_Os11g31360.1 |
| DG <sub>HP</sub> | Os055412_01 | S7 | 0.000  | 1.505  | P | 32206.659 | P | 39844.179 | P | 14034.738 | LOC_Os03g55734.1 |
| DG <sub>HP</sub> | Os055414_01 | S7 | 0.000  | -1.853 | P | 250.739   | P | 244.498   | P | 882.966   | LOC_Os11g33120.1 |
| DG <sub>HP</sub> | Os055450_01 | S7 | -0.809 | 0.000  | P | 2018.229  | P | 1152.207  | P | 849.863   | LOC_Os03g12560.1 |
| DG <sub>HP</sub> | Os055567_01 | S7 | 0.000  | -2.042 | P | 155.814   | P | 145.323   | P | 598.518   | LOC_Os07g46330.1 |
| DG <sub>HP</sub> | Os055618_01 | S7 | 0.000  | 2.155  | P | 644.416   | P | 744.334   | P | 167.102   | LOC_Os02g19420.1 |
| DG <sub>HP</sub> | Os055646_01 | S7 | -0.877 | 0.000  | P | 2098.749  | P | 1143.131  | P | 412.793   | LOC_Os12g29670.1 |
| DG <sub>HP</sub> | Os055707_01 | S7 | 0.000  | -1.535 | P | 969.843   | P | 1036.500  | P | 3004.108  | LOC_Os04g47990.1 |
| DG <sub>HP</sub> | Os055760_01 | S7 | 0.000  | 1.574  | P | 748.041   | P | 1084.375  | P | 364.140   | LOC_Os11g34390.1 |
| DG <sub>HP</sub> | Os056135_01 | S7 | -1.607 | 0.000  | P | 2261.433  | P | 742.414   | P | 1019.507  | LOC_Os10g13680.1 |
| DG <sub>HP</sub> | Os056324_01 | S7 | 1.082  | 0.000  | P | 164.488   | P | 348.140   | P | 646.389   | -                |
| DG <sub>HP</sub> | Os056340_01 | S7 | 0.926  | 1.683  | P | 644.696   | P | 1224.597  | P | 381.433   | LOC_Os07g08420.1 |
| DG <sub>HP</sub> | Os056402_01 | S7 | 1.007  | 0.000  | P | 105.441   | P | 211.845   | P | 211.049   | LOC_Os03g25430.1 |
| DG <sub>HP</sub> | Os056527_01 | S7 | 0.787  | 0.000  | P | 463.316   | P | 799.612   | P | 1145.025  | -                |
| DG <sub>HP</sub> | Os056701_01 | S7 | 0.740  | 0.000  | P | 1078.527  | P | 1801.276  | P | 838.632   | -                |
| DG <sub>HP</sub> | Os056838_01 | S7 | -1.297 | 0.000  | P | 2495.679  | P | 1015.843  | P | 732.762   | LOC_Os04g41970.1 |
| DG <sub>HP</sub> | Os056910_02 | S7 | -1.215 | -1.541 | P | 3445.595  | P | 1483.780  | P | 4318.018  | LOC_Os08g33820.1 |

|                  |             |    |        |        |   |          |   |          |   |          |                  |
|------------------|-------------|----|--------|--------|---|----------|---|----------|---|----------|------------------|
| DG <sub>HP</sub> | Os056921_02 | S7 | 0.896  | 0.000  | P | 157.618  | P | 293.291  | A | 78.558   | -                |
| DG <sub>HP</sub> | Os056928_02 | S7 | 0.000  | -2.359 | P | 232.888  | P | 212.590  | P | 1090.483 | LOC_Os09g27030.3 |
| DG <sub>HP</sub> | Os056942_02 | S7 | 1.135  | 0.000  | P | 266.314  | P | 584.839  | P | 739.865  | LOC_Os09g23110.1 |
| DG <sub>HP</sub> | Os057016_02 | S7 | 0.000  | -1.748 | P | 1520.432 | P | 1199.760 | P | 4029.776 | -                |
| DG <sub>HP</sub> | Os057030_02 | S7 | 1.154  | 0.000  | P | 171.559  | P | 381.774  | P | 825.043  | LOC_Os07g39470.1 |
| DG <sub>HP</sub> | Os057070_02 | S7 | 0.000  | -2.581 | P | 400.921  | P | 415.569  | P | 2486.430 | -                |
| DG <sub>HP</sub> | Os057164_02 | S7 | 0.000  | -1.414 | A | 118.219  | P | 199.270  | P | 530.940  | LOC_Os07g10780.1 |
| DG <sub>HP</sub> | Os057168_02 | S7 | 0.766  | 0.000  | P | 237.779  | P | 404.273  | P | 479.102  | -                |
| DG <sub>HP</sub> | Os057245_02 | S7 | 0.000  | -1.909 | P | 199.196  | P | 196.590  | P | 738.112  | LOC_Os07g48010.1 |
| DG <sub>HP</sub> | Os057254_02 | S7 | -1.027 | -1.552 | P | 3874.080 | P | 1901.489 | P | 5574.375 | -                |
| DG <sub>HP</sub> | Os057343_02 | S7 | 0.000  | -1.405 | P | 390.999  | P | 353.602  | P | 936.138  | LOC_Os03g01210.1 |
| DG <sub>HP</sub> | Os057361_02 | S7 | 0.739  | 0.000  | P | 199.587  | P | 333.188  | P | 370.941  | -                |
| DG <sub>HP</sub> | Os057480_02 | S7 | -1.077 | 0.000  | P | 4536.622 | P | 2150.685 | P | 1623.853 | -                |
| DG <sub>HP</sub> | Os057481_02 | S7 | 0.000  | -2.045 | A | 48.586   | P | 173.394  | P | 715.645  | LOC_Os04g43390.1 |
| DG <sub>HP</sub> | Os057552_02 | S7 | 1.583  | 0.000  | P | 228.729  | P | 685.292  | P | 390.712  | LOC_Os07g29760.1 |

| DG category      | GeneID      | Tissue | log2(N/P) | N Intens | P Intens | Tigr5 ID         |
|------------------|-------------|--------|-----------|----------|----------|------------------|
| DG <sub>PP</sub> | Os041048_01 | S1     | 1.196     | 731.411  | 319.265  | -                |
| DG <sub>PP</sub> | Os035905_01 | S1     | 1.523     | 920.492  | 320.194  | LOC_Os11g39020.1 |
| DG <sub>PP</sub> | Os029195_01 | S1     | 1.512     | 1073.824 | 376.469  | LOC_Os01g56420.1 |
| DG <sub>PP</sub> | Os006128_01 | S1     | 1.395     | 450.971  | 171.514  | -                |
| DG <sub>PP</sub> | Os002678_01 | S1     | 1.639     | 3930.918 | 1262.263 | LOC_Os05g03920.1 |
| DG <sub>PP</sub> | Os004137_01 | S1     | 1.138     | 459.916  | 208.968  | LOC_Os08g07290.1 |
| DG <sub>PP</sub> | Os040850_01 | S1     | 1.420     | 322.453  | 120.472  | LOC_Os03g30040.1 |
| DG <sub>PP</sub> | Os006587_01 | S1     | 1.811     | 914.366  | 260.538  | -                |
| DG <sub>PP</sub> | Os041081_01 | S1     | 1.362     | 341.068  | 132.676  | -                |
| DG <sub>PP</sub> | Os002918_01 | S1     | 1.172     | 480.184  | 213.105  | LOC_Os05g38680.1 |
| DG <sub>PP</sub> | Os004399_01 | S1     | 1.285     | 1035.240 | 424.880  | LOC_Os02g40180.1 |
| DG <sub>PP</sub> | Os056918_02 | S1     | 2.150     | 1838.523 | 414.269  | LOC_Os01g13690.1 |
| DG <sub>PP</sub> | Os029140_01 | S1     | 1.337     | 952.462  | 376.907  | LOC_Os08g01520.1 |
| DG <sub>PP</sub> | Os004301_01 | S1     | 1.417     | 401.623  | 150.419  | LOC_Os05g07870.1 |



|                  |             |    |       |          |          |                   |
|------------------|-------------|----|-------|----------|----------|-------------------|
| DG <sub>PP</sub> | Os057431_02 | S1 | 1.153 | 466.349  | 209.707  | LOC_Os06g21340.1  |
| DG <sub>PP</sub> | Os002233_01 | S1 | 2.245 | 682.767  | 144.044  | -                 |
| DG <sub>PP</sub> | Os008842_01 | S1 | 1.445 | 870.263  | 319.567  | LOC_Os11g39020.1  |
| DG <sub>PP</sub> | Os040035_01 | S1 | 1.279 | 1064.551 | 438.711  | -                 |
| DG <sub>PP</sub> | Os009529_01 | S1 | 1.155 | 435.757  | 195.673  | LOC_Os10g40934.10 |
| DG <sub>PP</sub> | Os010650_01 | S1 | 1.330 | 231.859  | 92.211   | LOC_Os09g39590.1  |
| DG <sub>PP</sub> | Os029722_01 | S1 | 1.228 | 1899.630 | 811.223  | LOC_Os05g03600.1  |
| DG <sub>PP</sub> | Os000902_01 | S1 | 1.268 | 517.527  | 214.892  | LOC_Os03g53360.1  |
| DG <sub>PP</sub> | Os037155_01 | S1 | 1.134 | 453.489  | 206.656  | LOC_Os06g45370.1  |
| DG <sub>PP</sub> | Os008587_01 | S1 | 1.240 | 327.132  | 138.538  | -                 |
| DG <sub>PP</sub> | Os010390_01 | S1 | 1.246 | 441.758  | 186.315  | LOC_Os05g48160.1  |
| DG <sub>PP</sub> | Os040593_01 | S1 | 1.389 | 502.467  | 191.851  | LOC_Os01g34614.1  |
| DG <sub>PP</sub> | Os001714_01 | S1 | 1.355 | 421.843  | 164.859  | LOC_Os08g02370.1  |
| DG <sub>PP</sub> | Os008640_01 | S1 | 1.755 | 3854.051 | 1142.229 | LOC_Os02g32814.1  |
| DG <sub>PP</sub> | Os009041_01 | S1 | 1.376 | 554.338  | 213.633  | LOC_Os01g16900.2  |
| DG <sub>PP</sub> | Os006301_01 | S1 | 1.134 | 314.369  | 143.246  | LOC_Os07g23880.1  |
| DG <sub>PP</sub> | Os028344_01 | S1 | 1.342 | 560.207  | 220.980  | LOC_Os01g45970.1  |
| DG <sub>PP</sub> | Os000689_01 | S1 | 1.309 | 388.427  | 156.791  | LOC_Os02g32990.1  |
| DG <sub>PP</sub> | Os001058_01 | S1 | 2.096 | 1059.820 | 247.920  | LOC_Os07g10540.1  |
| DG <sub>PP</sub> | Os001829_01 | S1 | 1.222 | 267.986  | 114.907  | LOC_Os12g43340.1  |
| DG <sub>PP</sub> | Os002197_01 | S1 | 3.295 | 1324.305 | 134.928  | LOC_Os01g63250.1  |
| DG <sub>PP</sub> | Os002221_01 | S1 | 1.159 | 402.875  | 180.464  | LOC_Os06g13280.1  |
| DG <sub>PP</sub> | Os003650_01 | S1 | 1.434 | 398.040  | 147.338  | LOC_Os03g15740.1  |
| DG <sub>PP</sub> | Os005465_01 | S1 | 1.264 | 234.189  | 97.514   | LOC_Os01g14370.2  |
| DG <sub>PP</sub> | Os008710_01 | S1 | 1.165 | 253.731  | 113.172  | LOC_Os03g11210.1  |
| DG <sub>PP</sub> | Os009128_01 | S1 | 1.173 | 343.632  | 152.349  | LOC_Os03g08810.1  |
| DG <sub>PP</sub> | Os009863_01 | S1 | 1.198 | 1362.753 | 594.009  | LOC_Os09g23160.1  |
| DG <sub>PP</sub> | Os009904_01 | S1 | 1.383 | 2041.387 | 782.862  | LOC_Os07g07540.1  |
| DG <sub>PP</sub> | Os010948_01 | S1 | 2.126 | 5351.655 | 1225.654 | LOC_Os03g03724.2  |
| DG <sub>PP</sub> | Os037671_01 | S1 | 1.299 | 277.812  | 112.934  | LOC_Os01g07890.1  |
| DG <sub>PP</sub> | Os038123_01 | S1 | 1.424 | 690.171  | 257.266  | LOC_Os09g09630.1  |

|                  |             |    |       |          |          |                  |
|------------------|-------------|----|-------|----------|----------|------------------|
| DG <sub>PP</sub> | Os057499_02 | S1 | 1.266 | 687.378  | 285.746  | LOC_Os02g27340.1 |
| DG <sub>PP</sub> | Os000907_01 | S1 | 1.668 | 342.200  | 107.685  | LOC_Os08g21561.1 |
| DG <sub>PP</sub> | Os002024_01 | S1 | 1.424 | 833.721  | 310.708  | LOC_Os01g69110.1 |
| DG <sub>PP</sub> | Os034452_01 | S1 | 1.440 | 429.609  | 158.292  | LOC_Os09g02350.1 |
| DG <sub>PP</sub> | Os008886_01 | S1 | 1.130 | 461.600  | 210.965  | LOC_Os11g10990.1 |
| DG <sub>PP</sub> | Os008928_01 | S1 | 1.182 | 386.760  | 170.405  | LOC_Os03g59710.1 |
| DG <sub>PP</sub> | Os008934_01 | S1 | 1.409 | 728.756  | 274.503  | LOC_Os02g15640.1 |
| DG <sub>PP</sub> | Os028782_01 | S1 | 1.225 | 329.852  | 141.065  | LOC_Os11g12810.1 |
| DG <sub>PP</sub> | Os000607_01 | S1 | 2.127 | 412.780  | 94.477   | -                |
| DG <sub>PP</sub> | Os000935_01 | S1 | 1.248 | 976.624  | 411.278  | LOC_Os02g42560.1 |
| DG <sub>PP</sub> | Os000896_01 | S1 | 1.602 | 559.446  | 184.281  | LOC_Os01g67220.2 |
| DG <sub>PP</sub> | Os010460_01 | S1 | 1.264 | 842.853  | 351.031  | -                |
| DG <sub>PP</sub> | Os008609_01 | S1 | 1.158 | 1347.604 | 603.773  | LOC_Os02g44500.1 |
| DG <sub>PP</sub> | Os009063_01 | S1 | 1.143 | 334.679  | 151.549  | LOC_Os04g43650.2 |
| DG <sub>PP</sub> | Os009767_01 | S1 | 1.196 | 870.479  | 379.890  | LOC_Os04g32270.2 |
| DG <sub>PP</sub> | Os039861_01 | S1 | 1.435 | 410.545  | 151.802  | LOC_Os11g42490.1 |
| DG <sub>PP</sub> | Os000047_01 | S1 | 1.774 | 450.813  | 131.838  | -                |
| DG <sub>PP</sub> | Os000053_01 | S1 | 1.341 | 2077.539 | 820.204  | LOC_Os03g55290.1 |
| DG <sub>PP</sub> | Os001925_01 | S1 | 1.741 | 495.900  | 148.398  | LOC_Os06g03860.1 |
| DG <sub>PP</sub> | Os003037_01 | S1 | 1.306 | 273.831  | 110.730  | -                |
| DG <sub>PP</sub> | Os030539_01 | S1 | 1.275 | 3688.394 | 1524.150 | LOC_Os09g32976.1 |
| DG <sub>PP</sub> | Os037023_01 | S1 | 1.165 | 236.383  | 105.399  | LOC_Os01g29469.1 |
| DG <sub>PP</sub> | Os007729_01 | S1 | 1.561 | 533.984  | 180.918  | LOC_Os09g29380.1 |
| DG <sub>PP</sub> | Os026390_01 | S1 | 1.225 | 670.631  | 286.993  | LOC_Os05g25040.2 |
| DG <sub>PP</sub> | Os028705_01 | S1 | 1.393 | 4050.826 | 1542.118 | LOC_Os05g09400.1 |
| DG <sub>PP</sub> | Os002898_01 | S1 | 1.139 | 367.858  | 166.995  | LOC_Os11g11330.1 |
| DG <sub>PP</sub> | Os010237_01 | S1 | 1.146 | 388.692  | 175.595  | LOC_Os05g12370.1 |
| DG <sub>PP</sub> | Os005944_01 | S1 | 1.228 | 9786.161 | 4178.792 | LOC_Os04g51070.1 |
| DG <sub>PP</sub> | Os008450_01 | S1 | 1.853 | 1870.112 | 517.827  | LOC_Os01g67980.1 |
| DG <sub>PP</sub> | Os005821_02 | S1 | 1.424 | 270.897  | 100.989  | -                |
| DG <sub>PP</sub> | Os008751_01 | S1 | 1.189 | 880.390  | 386.082  | -                |

|                  |             |    |       |          |          |                  |
|------------------|-------------|----|-------|----------|----------|------------------|
| DG <sub>PP</sub> | Os008781_01 | S1 | 1.172 | 645.312  | 286.333  | LOC_Os02g07410.1 |
| DG <sub>PP</sub> | Os009503_01 | S1 | 1.331 | 464.790  | 184.778  | LOC_Os01g63690.1 |
| DG <sub>PP</sub> | Os009885_01 | S1 | 1.428 | 610.469  | 226.826  | LOC_Os02g17330.1 |
| DG <sub>PP</sub> | Os011001_01 | S1 | 1.219 | 628.782  | 270.157  | LOC_Os05g46480.4 |
| DG <sub>PP</sub> | Os019935_01 | S1 | 1.317 | 890.251  | 357.258  | LOC_Os05g48700.1 |
| DG <sub>PP</sub> | Os047443_01 | S1 | 1.279 | 757.551  | 312.214  | LOC_Os05g18050.1 |
| DG <sub>PP</sub> | Os053065_01 | S1 | 1.776 | 505.074  | 147.466  | LOC_Os01g06530.1 |
| DG <sub>PP</sub> | Os015744_01 | S1 | 1.389 | 681.351  | 260.106  | LOC_Os04g54790.1 |
| DG <sub>PP</sub> | Os016542_01 | S1 | 1.399 | 790.105  | 299.675  | LOC_Os05g14270.1 |
| DG <sub>PP</sub> | Os017668_01 | S1 | 1.564 | 403.846  | 136.629  | LOC_Os05g47442.1 |
| DG <sub>PP</sub> | Os017691_01 | S1 | 1.176 | 1439.708 | 637.032  | LOC_Os12g31860.3 |
| DG <sub>PP</sub> | Os018745_01 | S1 | 1.187 | 1105.926 | 485.729  | LOC_Os01g17240.1 |
| DG <sub>PP</sub> | Os019163_01 | S1 | 1.581 | 5798.130 | 1938.652 | LOC_Os01g08560.2 |
| DG <sub>PP</sub> | Os019941_01 | S1 | 1.318 | 711.236  | 285.349  | LOC_Os03g19250.1 |
| DG <sub>PP</sub> | Os019947_01 | S1 | 1.426 | 371.412  | 138.256  | LOC_Os11g12050.2 |
| DG <sub>PP</sub> | Os020302_01 | S1 | 1.212 | 1117.166 | 482.145  | LOC_Os02g57180.1 |
| DG <sub>PP</sub> | Os021455_01 | S1 | 1.135 | 691.788  | 315.007  | LOC_Os03g55820.1 |
| DG <sub>PP</sub> | Os022942_01 | S1 | 1.180 | 254.314  | 112.209  | -                |
| DG <sub>PP</sub> | Os025882_01 | S1 | 1.128 | 593.404  | 271.566  | LOC_Os01g20830.1 |
| DG <sub>PP</sub> | Os054660_01 | S1 | 1.666 | 3095.774 | 975.786  | LOC_Os04g41560.2 |
| DG <sub>PP</sub> | Os055024_01 | S1 | 1.402 | 733.388  | 277.516  | LOC_Os04g53310.1 |
| DG <sub>PP</sub> | Os055331_01 | S1 | 1.153 | 754.344  | 339.248  | LOC_Os06g05060.1 |
| DG <sub>PP</sub> | Os013156_01 | S1 | 1.391 | 512.844  | 195.587  | LOC_Os03g62240.1 |
| DG <sub>PP</sub> | Os013532_01 | S1 | 1.864 | 1290.829 | 354.659  | LOC_Os01g55094.2 |
| DG <sub>PP</sub> | Os016689_01 | S1 | 1.974 | 656.576  | 167.176  | LOC_Os08g01514.1 |
| DG <sub>PP</sub> | Os020077_01 | S1 | 1.145 | 1673.339 | 756.789  | LOC_Os07g37800.1 |
| DG <sub>PP</sub> | Os017372_01 | S1 | 1.630 | 547.300  | 176.878  | LOC_Os11g45720.1 |
| DG <sub>PP</sub> | Os046160_01 | S1 | 1.217 | 553.073  | 237.917  | LOC_Os07g32440.1 |
| DG <sub>PP</sub> | Os016284_01 | S1 | 1.169 | 2010.686 | 894.320  | LOC_Os05g34650.1 |
| DG <sub>PP</sub> | Os016966_01 | S1 | 1.442 | 9418.272 | 3466.939 | LOC_Os04g32850.2 |
| DG <sub>PP</sub> | Os018865_01 | S1 | 1.360 | 1078.773 | 420.235  | -                |

|                  |             |    |       |           |           |                  |
|------------------|-------------|----|-------|-----------|-----------|------------------|
| DG <sub>PP</sub> | Os021857_01 | S1 | 1.140 | 1045.525  | 474.412   | LOC_Os10g41200.1 |
| DG <sub>PP</sub> | Os022964_01 | S1 | 1.267 | 482.605   | 200.499   | LOC_Os06g28060.1 |
| DG <sub>PP</sub> | Os024086_01 | S1 | 1.279 | 1622.368  | 668.320   | LOC_Os10g25310.1 |
| DG <sub>PP</sub> | Os054700_01 | S1 | 1.722 | 1255.861  | 380.561   | LOC_Os07g44330.2 |
| DG <sub>PP</sub> | Os011344_01 | S1 | 1.420 | 1080.729  | 404.015   | -                |
| DG <sub>PP</sub> | Os022079_01 | S1 | 1.624 | 533.154   | 173.005   | LOC_Os03g09230.2 |
| DG <sub>PP</sub> | Os015021_01 | S1 | 1.611 | 1861.891  | 609.587   | LOC_Os10g29502.1 |
| DG <sub>PP</sub> | Os025786_01 | S1 | 1.358 | 400.040   | 156.076   | -                |
| DG <sub>PP</sub> | Os052580_01 | S1 | 1.146 | 183.901   | 83.105    | LOC_Os01g69030.3 |
| DG <sub>PP</sub> | Os018760_01 | S1 | 1.188 | 237.025   | 104.019   | LOC_Os05g50660.1 |
| DG <sub>PP</sub> | Os019927_01 | S1 | 1.816 | 333.964   | 94.827    | LOC_Os05g37450.1 |
| DG <sub>PP</sub> | Os012279_01 | S1 | 1.167 | 389.004   | 173.295   | -                |
| DG <sub>PP</sub> | Os018766_01 | S1 | 1.199 | 579.083   | 252.215   | LOC_Os04g40670.1 |
| DG <sub>PP</sub> | Os018911_01 | S1 | 1.170 | 4387.750  | 1949.868  | LOC_Os10g01560.1 |
| DG <sub>PP</sub> | Os051763_01 | S1 | 1.332 | 564.329   | 224.108   | LOC_Os11g27100.1 |
| DG <sub>PP</sub> | Os020281_01 | S1 | 1.262 | 2197.120  | 916.115   | LOC_Os03g64130.1 |
| DG <sub>PP</sub> | Os042131_01 | S1 | 1.218 | 273.711   | 117.691   | LOC_Os09g08350.1 |
| DG <sub>PP</sub> | Os017110_01 | S1 | 1.764 | 284.979   | 83.893    | LOC_Os05g39000.1 |
| DG <sub>PP</sub> | Os017421_01 | S1 | 2.493 | 625.486   | 111.077   | LOC_Os02g44590.1 |
| DG <sub>PP</sub> | Os023497_01 | S1 | 1.250 | 1542.029  | 648.405   | -                |
| DG <sub>PP</sub> | Os043674_01 | S1 | 1.130 | 232.313   | 106.182   | LOC_Os05g18090.1 |
| DG <sub>PP</sub> | Os014807_01 | S1 | 1.304 | 305.753   | 123.816   | LOC_Os01g68620.1 |
| DG <sub>PP</sub> | Os015539_01 | S1 | 1.300 | 345.518   | 140.324   | LOC_Os02g55000.1 |
| DG <sub>PP</sub> | Os019665_01 | S1 | 1.816 | 1853.723  | 526.652   | -                |
| DG <sub>PP</sub> | Os019688_01 | S1 | 1.152 | 4389.057  | 1975.435  | LOC_Os04g02820.2 |
| DG <sub>PP</sub> | Os051892_01 | S1 | 1.249 | 29094.231 | 12238.363 | LOC_Os08g15149.1 |
| DG <sub>PP</sub> | Os055522_01 | S1 | 1.201 | 340.409   | 148.038   | LOC_Os08g16840.1 |
| DG <sub>PP</sub> | Os013718_01 | S1 | 1.436 | 592.100   | 218.810   | LOC_Os07g31850.1 |
| DG <sub>PP</sub> | Os042647_01 | S1 | 1.544 | 556.673   | 190.886   | LOC_Os07g03620.1 |
| DG <sub>PP</sub> | Os018286_01 | S1 | 1.176 | 836.548   | 370.209   | LOC_Os04g42470.4 |
| DG <sub>PP</sub> | Os018334_01 | S1 | 1.142 | 535.345   | 242.617   | LOC_Os03g50870.1 |

|                  |             |    |       |          |          |                  |
|------------------|-------------|----|-------|----------|----------|------------------|
| DG <sub>PP</sub> | Os048494_01 | S1 | 1.164 | 1924.353 | 858.957  | LOC_Os07g43860.1 |
| DG <sub>PP</sub> | Os018663_01 | S1 | 1.173 | 256.572  | 113.754  | LOC_Os06g33570.1 |
| DG <sub>PP</sub> | Os019083_01 | S1 | 1.330 | 370.038  | 147.238  | LOC_Os05g22960.1 |
| DG <sub>PP</sub> | Os019413_01 | S1 | 1.926 | 4021.955 | 1058.172 | LOC_Os07g49110.1 |
| DG <sub>PP</sub> | Os019788_01 | S1 | 1.151 | 812.179  | 365.772  | LOC_Os05g25840.3 |
| DG <sub>PP</sub> | Os052281_01 | S1 | 1.367 | 6638.018 | 2573.311 | LOC_Os07g46460.1 |
| DG <sub>PP</sub> | Os052323_01 | S1 | 1.146 | 8247.599 | 3727.225 | LOC_Os03g61260.2 |
| DG <sub>PP</sub> | Os023514_01 | S1 | 1.795 | 1908.699 | 549.922  | LOC_Os05g35050.1 |
| DG <sub>PP</sub> | Os053072_01 | S1 | 1.293 | 5350.860 | 2184.203 | LOC_Os03g49710.1 |
| DG <sub>PP</sub> | Os054497_01 | S1 | 1.134 | 590.918  | 269.312  | LOC_Os02g03280.2 |
| DG <sub>PP</sub> | Os042794_01 | S1 | 1.155 | 269.697  | 121.133  | LOC_Os02g27070.2 |
| DG <sub>PP</sub> | Os012318_01 | S1 | 1.316 | 986.911  | 396.451  | LOC_Os04g44430.1 |
| DG <sub>PP</sub> | Os012646_01 | S1 | 1.581 | 1207.045 | 403.430  | LOC_Os08g28730.1 |
| DG <sub>PP</sub> | Os012664_01 | S1 | 1.630 | 995.061  | 321.393  | LOC_Os02g52650.1 |
| DG <sub>PP</sub> | Os012670_01 | S1 | 1.142 | 756.131  | 342.730  | LOC_Os04g33310.1 |
| DG <sub>PP</sub> | Os014522_01 | S1 | 1.318 | 1165.401 | 467.530  | LOC_Os08g14450.1 |
| DG <sub>PP</sub> | Os015562_01 | S1 | 1.309 | 697.990  | 281.731  | LOC_Os12g05730.1 |
| DG <sub>PP</sub> | Os016307_01 | S1 | 1.214 | 460.497  | 198.541  | LOC_Os02g46850.1 |
| DG <sub>PP</sub> | Os016738_01 | S1 | 1.282 | 428.547  | 176.185  | LOC_Os02g28900.1 |
| DG <sub>PP</sub> | Os017862_01 | S1 | 1.351 | 562.747  | 220.638  | LOC_Os09g04730.1 |
| DG <sub>PP</sub> | Os018167_01 | S1 | 1.234 | 321.584  | 136.748  | LOC_Os01g49350.1 |
| DG <sub>PP</sub> | Os018191_01 | S1 | 1.229 | 488.056  | 208.190  | LOC_Os05g33730.1 |
| DG <sub>PP</sub> | Os018545_01 | S1 | 1.324 | 638.821  | 255.111  | LOC_Os09g27210.1 |
| DG <sub>PP</sub> | Os018984_01 | S1 | 1.532 | 728.793  | 252.029  | LOC_Os06g03600.2 |
| DG <sub>PP</sub> | Os019318_01 | S1 | 1.821 | 342.546  | 96.923   | LOC_Os01g67920.1 |
| DG <sub>PP</sub> | Os019336_01 | S1 | 1.138 | 176.631  | 80.262   | LOC_Os11g16280.1 |
| DG <sub>PP</sub> | Os019366_01 | S1 | 1.398 | 496.568  | 188.468  | LOC_Os03g13590.1 |
| DG <sub>PP</sub> | Os019670_01 | S1 | 1.167 | 590.716  | 263.114  | LOC_Os08g23110.1 |
| DG <sub>PP</sub> | Os020090_01 | S1 | 1.144 | 427.606  | 193.528  | LOC_Os01g52640.3 |
| DG <sub>PP</sub> | Os020427_01 | S1 | 1.379 | 1164.845 | 447.761  | LOC_Os08g02690.1 |
| DG <sub>PP</sub> | Os020445_01 | S1 | 1.340 | 1133.251 | 447.670  | LOC_Os06g43210.1 |

|                  |             |    |        |          |          |                   |
|------------------|-------------|----|--------|----------|----------|-------------------|
| DG <sub>PP</sub> | Os020872_01 | S1 | 1.422  | 432.553  | 161.410  | LOC_Os01g72870.2  |
| DG <sub>PP</sub> | Os021933_01 | S1 | 1.362  | 686.656  | 267.072  | LOC_Os08g32100.1  |
| DG <sub>PP</sub> | Os021951_01 | S1 | 1.239  | 660.209  | 279.756  | LOC_Os02g011170.1 |
| DG <sub>PP</sub> | Os052212_01 | S1 | 1.189  | 1061.057 | 465.390  | LOC_Os02g33080.1  |
| DG <sub>PP</sub> | Os052235_01 | S1 | 1.377  | 663.146  | 255.321  | LOC_Os03g24580.1  |
| DG <sub>PP</sub> | Os054783_01 | S1 | 1.304  | 967.661  | 392.018  | LOC_Os02g31290.2  |
| DG <sub>PP</sub> | Os055176_01 | S1 | 1.345  | 791.054  | 311.328  | LOC_Os07g33630.1  |
| DG <sub>PP</sub> | Os055891_01 | S1 | 1.345  | 820.997  | 323.275  | LOC_Os03g27820.1  |
| DG <sub>PP</sub> | Os012152_01 | S1 | 1.658  | 1190.163 | 377.237  | LOC_Os01g18800.1  |
| DG <sub>PP</sub> | Os012218_01 | S1 | 2.356  | 1745.023 | 340.823  | LOC_Os02g41550.3  |
| DG <sub>PP</sub> | Os012547_01 | S1 | 2.078  | 1004.469 | 237.912  | LOC_Os02g10350.1  |
| DG <sub>PP</sub> | Os012571_01 | S1 | 1.348  | 384.171  | 150.932  | LOC_Os05g05590.1  |
| DG <sub>PP</sub> | Os013279_01 | S1 | 1.452  | 862.909  | 315.496  | LOC_Os07g35480.3  |
| DG <sub>PP</sub> | Os013652_01 | S1 | 1.511  | 953.492  | 334.578  | LOC_Os04g51120.1  |
| DG <sub>PP</sub> | Os013670_01 | S1 | 1.157  | 505.822  | 226.764  | LOC_Os07g42770.1  |
| DG <sub>PP</sub> | Os013723_01 | S1 | 1.376  | 493.883  | 190.337  | LOC_Os03g62370.1  |
| DG <sub>PP</sub> | Os047230_01 | S1 | 1.524  | 842.701  | 292.950  | LOC_Os10g30440.1  |
| DG <sub>PP</sub> | Os020332_01 | S1 | 1.495  | 1129.825 | 400.861  | LOC_Os03g47580.1  |
| DG <sub>PP</sub> | Os013959_01 | S1 | 1.137  | 1436.509 | 653.320  | LOC_Os01g31870.1  |
| DG <sub>PP</sub> | Os030307_01 | S1 | -1.340 | 122.520  | 310.064  | LOC_Os07g36510.1  |
| DG <sub>PP</sub> | Os031441_01 | S1 | -1.290 | 192.565  | 470.894  | LOC_Os04g20910.1  |
| DG <sub>PP</sub> | Os031447_01 | S1 | -1.854 | 106.127  | 383.522  | LOC_Os01g34940.1  |
| DG <sub>PP</sub> | Os006051_01 | S1 | -1.609 | 489.732  | 1494.345 | LOC_Os07g04480.1  |
| DG <sub>PP</sub> | Os034083_01 | S1 | -1.208 | 176.419  | 407.609  | LOC_Os02g44700.1  |
| DG <sub>PP</sub> | Os036357_01 | S1 | -1.272 | 195.919  | 473.154  | -                 |
| DG <sub>PP</sub> | Os040133_01 | S1 | -1.685 | 139.654  | 449.148  | LOC_Os08g37050.1  |
| DG <sub>PP</sub> | Os028045_01 | S1 | -1.169 | 111.815  | 251.497  | LOC_Os02g15300.1  |
| DG <sub>PP</sub> | Os000594_01 | S1 | -1.311 | 409.067  | 1014.858 | LOC_Os04g29550.1  |
| DG <sub>PP</sub> | Os030016_01 | S1 | -1.248 | 122.835  | 291.677  | LOC_Os08g38510.1  |
| DG <sub>PP</sub> | Os030378_01 | S1 | -1.514 | 727.480  | 2077.640 | LOC_Os06g09390.2  |
| DG <sub>PP</sub> | Os030806_01 | S1 | -1.211 | 1162.232 | 2690.285 | -                 |

|                  |             |    |        |           |           |                  |
|------------------|-------------|----|--------|-----------|-----------|------------------|
| DG <sub>PP</sub> | Os033846_01 | S1 | -2.553 | 118.698   | 696.752   | LOC_Os03g51570.1 |
| DG <sub>PP</sub> | Os036814_01 | S1 | -1.170 | 277.079   | 623.660   | LOC_Os11g26400.1 |
| DG <sub>PP</sub> | Os036725_01 | S1 | -1.571 | 209.911   | 623.869   | -                |
| DG <sub>PP</sub> | Os000258_01 | S1 | -1.204 | 158.982   | 366.201   | LOC_Os02g51320.1 |
| DG <sub>PP</sub> | Os030408_01 | S1 | -1.233 | 629.251   | 1479.069  | -                |
| DG <sub>PP</sub> | Os032468_01 | S1 | -1.629 | 163.401   | 505.347   | LOC_Os03g49930.1 |
| DG <sub>PP</sub> | Os036286_01 | S1 | -1.311 | 147.945   | 367.182   | LOC_Os08g01910.1 |
| DG <sub>PP</sub> | Os002166_02 | S1 | -1.173 | 285.838   | 644.593   | -                |
| DG <sub>PP</sub> | Os008720_01 | S1 | -3.987 | 99.696    | 1581.209  | -                |
| DG <sub>PP</sub> | Os000446_01 | S1 | -1.374 | 1247.046  | 3232.778  | LOC_Os05g02070.1 |
| DG <sub>PP</sub> | Os001942_01 | S1 | -1.294 | 4710.273  | 11547.437 | -                |
| DG <sub>PP</sub> | Os010699_01 | S1 | -1.201 | 263.016   | 604.479   | LOC_Os03g60720.1 |
| DG <sub>PP</sub> | Os010958_01 | S1 | -1.333 | 10410.444 | 26221.862 | LOC_Os06g11860.1 |
| DG <sub>PP</sub> | Os031446_01 | S1 | -1.474 | 239.387   | 665.117   | -                |
| DG <sub>PP</sub> | Os033744_01 | S1 | -1.201 | 149.056   | 342.573   | LOC_Os03g05450.1 |
| DG <sub>PP</sub> | Os034533_01 | S1 | -1.223 | 124.307   | 290.160   | LOC_Os05g12270.1 |
| DG <sub>PP</sub> | Os039877_01 | S1 | -1.790 | 179.023   | 619.202   | -                |
| DG <sub>PP</sub> | Os041041_01 | S1 | -1.239 | 171.522   | 404.729   | LOC_Os03g05600.1 |
| DG <sub>PP</sub> | Os036131_01 | S1 | -1.304 | 766.216   | 1892.482  | -                |
| DG <sub>PP</sub> | Os030917_01 | S1 | -1.187 | 172.438   | 392.565   | LOC_Os10g34130.1 |
| DG <sub>PP</sub> | Os026388_01 | S1 | -1.271 | 299.896   | 723.786   | LOC_Os07g02430.1 |
| DG <sub>PP</sub> | Os027168_01 | S1 | -1.705 | 101.440   | 330.819   | LOC_Os11g41260.1 |
| DG <sub>PP</sub> | Os031968_01 | S1 | -1.760 | 130.321   | 441.502   | LOC_Os01g60520.1 |
| DG <sub>PP</sub> | Os009054_01 | S1 | -1.291 | 232.160   | 568.276   | LOC_Os02g49790.1 |
| DG <sub>PP</sub> | Os000875_01 | S1 | -1.217 | 125.071   | 290.725   | LOC_Os07g46180.1 |
| DG <sub>PP</sub> | Os000168_01 | S1 | -5.954 | 114.900   | 7123.112  | LOC_Os07g15959.1 |
| DG <sub>PP</sub> | Os003794_01 | S1 | -4.053 | 179.086   | 2971.579  | LOC_Os09g27010.1 |
| DG <sub>PP</sub> | Os036402_01 | S1 | -2.973 | 319.259   | 2506.206  | -                |
| DG <sub>PP</sub> | Os009664_01 | S1 | -1.365 | 300.751   | 774.485   | LOC_Os03g04470.1 |
| DG <sub>PP</sub> | Os010823_01 | S1 | -1.270 | 174.353   | 420.425   | LOC_Os01g29180.1 |
| DG <sub>PP</sub> | Os039822_01 | S1 | -2.052 | 435.779   | 1807.529  | LOC_Os10g10260.1 |

|                  |             |    |        |          |          |                  |
|------------------|-------------|----|--------|----------|----------|------------------|
| DG <sub>PP</sub> | Os028048_01 | S1 | -4.571 | 155.028  | 3685.582 | LOC_Os09g16300.1 |
| DG <sub>PP</sub> | Os028725_01 | S1 | -1.186 | 223.876  | 509.422  | LOC_Os11g04430.1 |
| DG <sub>PP</sub> | Os010185_01 | S1 | -1.393 | 100.374  | 263.628  | LOC_Os07g12200.1 |
| DG <sub>PP</sub> | Os014957_01 | S1 | -1.332 | 92.742   | 233.409  | LOC_Os04g23630.1 |
| DG <sub>PP</sub> | Os014557_01 | S1 | -1.611 | 183.180  | 559.693  | LOC_Os03g22620.1 |
| DG <sub>PP</sub> | Os052610_01 | S1 | -1.217 | 103.557  | 240.721  | LOC_Os06g18670.1 |
| DG <sub>PP</sub> | Os043156_01 | S1 | -1.363 | 731.979  | 1883.072 | LOC_Os12g31748.1 |
| DG <sub>PP</sub> | Os055586_01 | S1 | -1.178 | 116.033  | 262.572  | LOC_Os01g15290.2 |
| DG <sub>PP</sub> | Os045347_01 | S1 | -3.103 | 195.087  | 1676.094 | LOC_Os06g18120.1 |
| DG <sub>PP</sub> | Os014289_01 | S1 | -1.782 | 99.232   | 341.221  | LOC_Os07g26000.1 |
| DG <sub>PP</sub> | Os013014_01 | S1 | -1.203 | 150.880  | 347.324  | LOC_Os01g06550.1 |
| DG <sub>PP</sub> | Os045565_01 | S1 | -2.082 | 138.581  | 586.593  | LOC_Os10g09630.1 |
| DG <sub>PP</sub> | Os011980_01 | S1 | -2.748 | 87.378   | 587.066  | LOC_Os01g42710.1 |
| DG <sub>PP</sub> | Os011314_01 | S1 | -1.469 | 122.346  | 338.620  | LOC_Os06g08910.3 |
| DG <sub>PP</sub> | Os044283_01 | S1 | -3.004 | 297.732  | 2389.160 | -                |
| DG <sub>PP</sub> | Os055242_01 | S1 | -1.756 | 104.605  | 353.256  | LOC_Os03g13210.1 |
| DG <sub>PP</sub> | Os041295_01 | S1 | -1.663 | 104.833  | 331.898  | LOC_Os06g01920.1 |
| DG <sub>PP</sub> | Os041319_01 | S1 | -1.653 | 105.821  | 332.804  | LOC_Os12g29540.1 |
| DG <sub>PP</sub> | Os042417_01 | S1 | -2.062 | 95.525   | 398.997  | LOC_Os11g35930.1 |
| DG <sub>PP</sub> | Os013494_01 | S1 | -1.173 | 2531.279 | 5708.430 | LOC_Os04g21790.1 |
| DG <sub>PP</sub> | Os051974_01 | S1 | -1.380 | 1010.525 | 2629.904 | LOC_Os01g03360.1 |
| DG <sub>PP</sub> | Os023165_01 | S1 | -1.207 | 155.344  | 358.542  | LOC_Os10g41560.1 |
| DG <sub>PP</sub> | Os023881_01 | S1 | -1.505 | 130.789  | 371.086  | LOC_Os03g53690.1 |
| DG <sub>PP</sub> | Os044377_01 | S1 | -1.903 | 130.546  | 488.118  | LOC_Os09g16530.1 |
| DG <sub>PP</sub> | Os043890_01 | S1 | -1.287 | 104.063  | 253.892  | LOC_Os05g12790.1 |
| DG <sub>PP</sub> | Os011820_01 | S1 | -2.430 | 103.607  | 558.188  | -                |
| DG <sub>PP</sub> | Os019650_01 | S1 | -1.362 | 210.610  | 541.414  | LOC_Os07g48200.1 |
| DG <sub>PP</sub> | Os022605_01 | S1 | -1.307 | 164.761  | 407.748  | LOC_Os03g59580.1 |
| DG <sub>PP</sub> | Os055842_01 | S1 | -1.722 | 534.933  | 1764.901 | LOC_Os01g54800.1 |
| DG <sub>PP</sub> | Os055421_01 | S1 | -1.370 | 161.950  | 418.587  | LOC_Os01g42860.1 |
| DG <sub>PP</sub> | Os043831_01 | S1 | -1.346 | 98.905   | 251.498  | -                |



|                  |             |    |        |         |          |                  |
|------------------|-------------|----|--------|---------|----------|------------------|
| DG <sub>PP</sub> | Os024745_01 | S1 | -1.413 | 108.552 | 289.154  | LOC_Os05g06510.1 |
| DG <sub>PP</sub> | Os052783_01 | S1 | -1.633 | 99.850  | 309.688  | LOC_Os04g47580.1 |
| DG <sub>PP</sub> | Os053102_01 | S1 | -1.173 | 84.217  | 189.905  | LOC_Os10g07480.1 |
| DG <sub>PP</sub> | Os053489_01 | S1 | -1.654 | 232.261 | 730.740  | LOC_Os11g17480.1 |
| DG <sub>PP</sub> | Os054568_01 | S1 | -1.595 | 456.398 | 1378.630 | LOC_Os06g29180.1 |
| DG <sub>PP</sub> | Os054592_01 | S1 | -1.510 | 658.599 | 1875.829 | LOC_Os05g06310.1 |
| DG <sub>PP</sub> | Os054598_01 | S1 | -1.977 | 157.898 | 621.687  | LOC_Os01g07310.1 |
| DG <sub>PP</sub> | Os054622_01 | S1 | -1.234 | 415.028 | 976.369  | LOC_Os06g37180.1 |
| DG <sub>PP</sub> | Os054646_01 | S1 | -1.853 | 91.158  | 329.216  | LOC_Os01g73910.1 |
| DG <sub>PP</sub> | Os055334_01 | S1 | -1.254 | 299.341 | 713.905  | LOC_Os10g37240.1 |
| DG <sub>PP</sub> | Os055340_01 | S1 | -1.284 | 112.015 | 272.689  | -                |
| DG <sub>PP</sub> | Os055682_01 | S1 | -1.222 | 90.716  | 211.576  | LOC_Os08g29500.1 |
| DG <sub>PP</sub> | Os011655_01 | S1 | -1.269 | 77.947  | 187.812  | LOC_Os10g21360.1 |
| DG <sub>PP</sub> | Os054493_01 | S1 | -1.182 | 624.814 | 1417.749 | LOC_Os03g22810.1 |
| DG <sub>PP</sub> | Os012660_01 | S1 | -1.389 | 86.701  | 227.027  | LOC_Os01g48910.2 |
| DG <sub>PP</sub> | Os025501_01 | S1 | -1.529 | 170.295 | 491.452  | LOC_Os04g48410.1 |
| DG <sub>PP</sub> | Os012425_01 | S1 | -1.289 | 91.580  | 223.725  | -                |
| DG <sub>PP</sub> | Os054428_01 | S1 | -1.261 | 99.900  | 239.373  | LOC_Os01g42860.1 |
| DG <sub>PP</sub> | Os014364_01 | S1 | -1.733 | 158.973 | 528.587  | LOC_Os01g45914.1 |
| DG <sub>PP</sub> | Os052266_01 | S1 | -1.387 | 125.777 | 328.989  | LOC_Os01g40860.1 |
| DG <sub>PP</sub> | Os014085_01 | S1 | -1.563 | 206.733 | 610.746  | -                |
| DG <sub>PP</sub> | Os041269_01 | S1 | -1.371 | 169.270 | 437.888  | LOC_Os10g01500.1 |
| DG <sub>PP</sub> | Os018051_01 | S1 | -1.938 | 110.265 | 422.595  | LOC_Os06g35480.1 |
| DG <sub>PP</sub> | Os012013_01 | S1 | -1.390 | 180.947 | 474.376  | LOC_Os01g50622.4 |
| DG <sub>PP</sub> | Os014887_01 | S1 | -2.140 | 194.991 | 859.407  | LOC_Os04g25740.1 |
| DG <sub>PP</sub> | Os015693_01 | S1 | -1.254 | 475.684 | 1134.704 | LOC_Os10g11354.1 |
| DG <sub>PP</sub> | Os043567_01 | S1 | -1.480 | 191.872 | 535.369  | LOC_Os11g17040.1 |
| DG <sub>PP</sub> | Os015060_01 | S1 | -1.218 | 95.505  | 222.112  | LOC_Os03g45970.3 |
| DG <sub>PP</sub> | Os019937_01 | S1 | -2.649 | 239.398 | 1501.364 | LOC_Os10g03750.1 |
| DG <sub>PP</sub> | Os052960_01 | S1 | -1.830 | 230.463 | 819.346  | LOC_Os01g12110.2 |
| DG <sub>PP</sub> | Os043894_01 | S1 | -1.990 | 117.549 | 467.084  | LOC_Os12g31000.1 |

|                  |             |    |        |          |          |                  |
|------------------|-------------|----|--------|----------|----------|------------------|
| DG <sub>PP</sub> | Os044565_01 | S1 | -1.310 | 360.703  | 894.317  | -                |
| DG <sub>PP</sub> | Os041369_01 | S1 | -1.971 | 87.775   | 344.225  | LOC_Os10g17590.1 |
| DG <sub>PP</sub> | Os046600_01 | S1 | -1.442 | 264.388  | 718.110  | -                |
| DG <sub>PP</sub> | Os019560_01 | S1 | -1.422 | 117.374  | 314.552  | LOC_Os10g03850.1 |
| DG <sub>PP</sub> | Os021073_01 | S1 | -1.367 | 994.449  | 2564.343 | LOC_Os02g39000.1 |
| DG <sub>PP</sub> | Os024737_01 | S1 | -1.229 | 116.011  | 271.857  | LOC_Os01g01660.1 |
| DG <sub>PP</sub> | Os054626_01 | S1 | -1.592 | 221.332  | 667.360  | LOC_Os03g22810.1 |
| DG <sub>PP</sub> | Os044196_01 | S1 | -2.031 | 308.682  | 1261.448 | LOC_Os05g32650.1 |
| DG <sub>PP</sub> | Os043923_01 | S1 | -3.058 | 217.861  | 1814.490 | LOC_Os02g27160.1 |
| DG <sub>PP</sub> | Os011454_01 | S1 | -1.300 | 239.896  | 590.896  | LOC_Os01g43080.1 |
| DG <sub>PP</sub> | Os021479_01 | S1 | -1.925 | 78.898   | 299.695  | LOC_Os04g09654.1 |
| DG <sub>PP</sub> | Os025187_01 | S1 | -1.184 | 107.841  | 244.977  | -                |
| DG <sub>PP</sub> | Os003434_01 | S2 | 1.412  | 595.983  | 223.901  | LOC_Os03g48170.1 |
| DG <sub>PP</sub> | Os038619_01 | S2 | 1.269  | 2252.693 | 934.492  | -                |
| DG <sub>PP</sub> | Os026160_01 | S2 | 1.263  | 579.118  | 241.256  | LOC_Os01g14650.1 |
| DG <sub>PP</sub> | Os035342_01 | S2 | 1.420  | 466.418  | 174.302  | LOC_Os12g21870.1 |
| DG <sub>PP</sub> | Os001988_01 | S2 | 1.416  | 271.466  | 101.698  | LOC_Os02g29190.1 |
| DG <sub>PP</sub> | Os031055_01 | S2 | 1.294  | 269.044  | 109.699  | LOC_Os03g08230.1 |
| DG <sub>PP</sub> | Os035591_01 | S2 | 1.336  | 1457.459 | 577.147  | LOC_Os11g32010.1 |
| DG <sub>PP</sub> | Os008519_01 | S2 | 1.355  | 412.403  | 161.278  | LOC_Os01g66100.1 |
| DG <sub>PP</sub> | Os039771_01 | S2 | 2.081  | 645.807  | 152.601  | LOC_Os01g24970.1 |
| DG <sub>PP</sub> | Os002807_01 | S2 | 1.305  | 451.078  | 182.555  | -                |
| DG <sub>PP</sub> | Os010136_01 | S2 | 2.089  | 778.352  | 182.994  | LOC_Os11g06730.1 |
| DG <sub>PP</sub> | Os040246_01 | S2 | 1.346  | 1657.855 | 652.181  | LOC_Os08g44670.1 |
| DG <sub>PP</sub> | Os035930_01 | S2 | 1.263  | 262.224  | 109.262  | LOC_Os04g31290.1 |
| DG <sub>PP</sub> | Os040062_01 | S2 | 1.316  | 351.172  | 141.023  | -                |
| DG <sub>PP</sub> | Os026372_01 | S2 | 2.195  | 481.946  | 105.229  | LOC_Os05g27530.1 |
| DG <sub>PP</sub> | Os028543_01 | S2 | 1.341  | 401.587  | 158.481  | LOC_Os03g47890.1 |
| DG <sub>PP</sub> | Os000023_01 | S2 | 3.950  | 1271.764 | 82.261   | LOC_Os02g15980.1 |
| DG <sub>PP</sub> | Os000040_01 | S2 | 1.467  | 4812.716 | 1740.724 | LOC_Os01g65440.1 |
| DG <sub>PP</sub> | Os000128_01 | S2 | 1.445  | 869.707  | 319.509  | LOC_Os06g12740.1 |

|                  |             |    |       |          |          |                  |
|------------------|-------------|----|-------|----------|----------|------------------|
| DG <sub>PP</sub> | Os010147_01 | S2 | 1.322 | 4786.666 | 1913.979 | LOC_Os12g43670.1 |
| DG <sub>PP</sub> | Os002390_01 | S2 | 1.863 | 9821.673 | 2700.499 | LOC_Os07g05360.1 |
| DG <sub>PP</sub> | Os028157_01 | S2 | 1.972 | 1172.796 | 299.020  | LOC_Os10g32110.1 |
| DG <sub>PP</sub> | Os032871_01 | S2 | 1.939 | 460.834  | 120.204  | -                |
| DG <sub>PP</sub> | Os032503_01 | S2 | 1.275 | 667.162  | 275.623  | LOC_Os10g08190.1 |
| DG <sub>PP</sub> | Os034759_01 | S2 | 1.443 | 3425.374 | 1259.617 | LOC_Os04g13090.1 |
| DG <sub>PP</sub> | Os010652_01 | S2 | 1.589 | 1054.527 | 350.553  | -                |
| DG <sub>PP</sub> | Os039580_01 | S2 | 3.087 | 1303.830 | 153.482  | LOC_Os02g40180.1 |
| DG <sub>PP</sub> | Os009659_01 | S2 | 1.329 | 468.228  | 186.319  | LOC_Os03g62010.1 |
| DG <sub>PP</sub> | Os040304_01 | S2 | 2.711 | 775.487  | 118.465  | LOC_Os04g06879.1 |
| DG <sub>PP</sub> | Os030162_01 | S2 | 1.513 | 1145.618 | 401.354  | LOC_Os04g51760.1 |
| DG <sub>PP</sub> | Os036907_01 | S2 | 1.957 | 2409.611 | 620.496  | LOC_Os05g48780.1 |
| DG <sub>PP</sub> | Os004399_01 | S2 | 2.987 | 1562.590 | 197.025  | LOC_Os02g40180.1 |
| DG <sub>PP</sub> | Os030672_01 | S2 | 1.399 | 350.264  | 132.804  | LOC_Os08g40120.1 |
| DG <sub>PP</sub> | Os031408_01 | S2 | 1.307 | 477.094  | 192.787  | LOC_Os12g09770.1 |
| DG <sub>PP</sub> | Os029823_01 | S2 | 1.392 | 813.852  | 310.121  | -                |
| DG <sub>PP</sub> | Os030589_01 | S2 | 1.548 | 296.826  | 101.479  | LOC_Os10g08990.1 |
| DG <sub>PP</sub> | Os008441_01 | S2 | 1.577 | 620.052  | 207.758  | LOC_Os03g49190.1 |
| DG <sub>PP</sub> | Os008400_01 | S2 | 1.417 | 1263.825 | 473.356  | LOC_Os02g57720.1 |
| DG <sub>PP</sub> | Os028807_01 | S2 | 2.099 | 774.496  | 180.762  | -                |
| DG <sub>PP</sub> | Os029109_01 | S2 | 1.697 | 469.463  | 144.844  | LOC_Os12g01720.1 |
| DG <sub>PP</sub> | Os030344_01 | S2 | 1.276 | 858.248  | 354.488  | LOC_Os12g43820.1 |
| DG <sub>PP</sub> | Os028106_01 | S2 | 1.311 | 345.637  | 139.321  | LOC_Os12g06290.1 |
| DG <sub>PP</sub> | Os000060_01 | S2 | 1.610 | 680.971  | 223.072  | LOC_Os02g42700.1 |
| DG <sub>PP</sub> | Os000066_01 | S2 | 3.036 | 936.586  | 114.168  | LOC_Os12g19350.1 |
| DG <sub>PP</sub> | Os001204_01 | S2 | 3.152 | 818.278  | 92.062   | LOC_Os06g24594.1 |
| DG <sub>PP</sub> | Os001521_01 | S2 | 3.381 | 1340.908 | 128.701  | LOC_Os08g37140.1 |
| DG <sub>PP</sub> | Os002658_01 | S2 | 1.545 | 485.897  | 166.519  | LOC_Os02g03530.1 |
| DG <sub>PP</sub> | Os001104_01 | S2 | 1.691 | 1260.572 | 390.450  | LOC_Os01g46700.1 |
| DG <sub>PP</sub> | Os032267_01 | S2 | 3.099 | 1518.319 | 177.171  | LOC_Os06g08690.1 |
| DG <sub>PP</sub> | Os004249_01 | S2 | 1.848 | 462.328  | 128.456  | LOC_Os11g47140.1 |

|                  |             |    |       |          |          |                  |
|------------------|-------------|----|-------|----------|----------|------------------|
| DG <sub>PP</sub> | Os010912_01 | S2 | 1.539 | 520.237  | 179.058  | LOC_Os06g23870.1 |
| DG <sub>PP</sub> | Os057433_02 | S2 | 1.310 | 450.437  | 181.721  | -                |
| DG <sub>PP</sub> | Os008169_01 | S2 | 2.301 | 1563.154 | 317.158  | LOC_Os02g40240.2 |
| DG <sub>PP</sub> | Os031721_01 | S2 | 1.608 | 368.330  | 120.792  | -                |
| DG <sub>PP</sub> | Os035877_01 | S2 | 1.438 | 508.707  | 187.753  | -                |
| DG <sub>PP</sub> | Os037041_01 | S2 | 2.123 | 678.605  | 155.784  | -                |
| DG <sub>PP</sub> | Os009967_01 | S2 | 1.404 | 499.626  | 188.863  | LOC_Os02g32450.1 |
| DG <sub>PP</sub> | Os037451_01 | S2 | 1.321 | 542.359  | 217.127  | LOC_Os12g17870.1 |
| DG <sub>PP</sub> | Os040841_01 | S2 | 2.760 | 2128.903 | 314.350  | LOC_Os05g38390.1 |
| DG <sub>PP</sub> | Os000683_01 | S2 | 1.308 | 365.048  | 147.431  | -                |
| DG <sub>PP</sub> | Os001920_01 | S2 | 3.008 | 5705.724 | 709.175  | LOC_Os02g41580.1 |
| DG <sub>PP</sub> | Os038128_01 | S2 | 1.314 | 540.538  | 217.464  | LOC_Os03g59990.1 |
| DG <sub>PP</sub> | Os016453_01 | S2 | 1.293 | 340.185  | 138.843  | LOC_Os06g36210.1 |
| DG <sub>PP</sub> | Os023895_01 | S2 | 1.293 | 221.069  | 90.244   | LOC_Os02g47370.1 |
| DG <sub>PP</sub> | Os054478_01 | S2 | 1.511 | 338.657  | 118.837  | LOC_Os10g41410.2 |
| DG <sub>PP</sub> | Os054921_01 | S2 | 1.488 | 368.866  | 131.469  | LOC_Os02g06650.1 |
| DG <sub>PP</sub> | Os042461_01 | S2 | 1.340 | 312.397  | 123.431  | LOC_Os05g10760.1 |
| DG <sub>PP</sub> | Os014195_01 | S2 | 1.363 | 354.018  | 137.672  | -                |
| DG <sub>PP</sub> | Os016476_01 | S2 | 1.292 | 271.052  | 110.686  | LOC_Os01g15770.1 |
| DG <sub>PP</sub> | Os054220_01 | S2 | 1.478 | 556.596  | 199.810  | LOC_Os01g14630.1 |
| DG <sub>PP</sub> | Os014603_01 | S2 | 1.728 | 786.333  | 237.318  | LOC_Os01g55870.1 |
| DG <sub>PP</sub> | Os016023_01 | S2 | 2.435 | 1344.955 | 248.733  | LOC_Os11g38980.4 |
| DG <sub>PP</sub> | Os017568_01 | S2 | 1.586 | 395.621  | 131.761  | LOC_Os03g43590.1 |
| DG <sub>PP</sub> | Os019472_01 | S2 | 1.286 | 827.433  | 339.211  | LOC_Os05g46770.2 |
| DG <sub>PP</sub> | Os044729_01 | S2 | 1.839 | 615.344  | 171.997  | LOC_Os05g30200.1 |
| DG <sub>PP</sub> | Os018414_01 | S2 | 1.615 | 3151.130 | 1029.023 | LOC_Os07g28910.1 |
| DG <sub>PP</sub> | Os045632_01 | S2 | 1.581 | 3376.181 | 1128.400 | LOC_Os07g18070.1 |
| DG <sub>PP</sub> | Os019163_01 | S2 | 1.498 | 1920.132 | 680.024  | LOC_Os01g08560.2 |
| DG <sub>PP</sub> | Os019169_01 | S2 | 1.417 | 1511.350 | 566.020  | LOC_Os10g02630.1 |
| DG <sub>PP</sub> | Os019869_01 | S2 | 1.467 | 3050.250 | 1103.340 | LOC_Os01g61460.1 |
| DG <sub>PP</sub> | Os019947_01 | S2 | 2.066 | 382.073  | 91.256   | LOC_Os11g12050.2 |

|                  |             |    |       |           |          |                  |
|------------------|-------------|----|-------|-----------|----------|------------------|
| DG <sub>PP</sub> | Os020706_01 | S2 | 1.686 | 357.544   | 111.097  | LOC_Os02g18660.1 |
| DG <sub>PP</sub> | Os053917_01 | S2 | 1.374 | 527.301   | 203.450  | LOC_Os01g67540.1 |
| DG <sub>PP</sub> | Os054977_01 | S2 | 1.266 | 795.624   | 330.790  | LOC_Os01g59970.1 |
| DG <sub>PP</sub> | Os042188_01 | S2 | 1.315 | 373.566   | 150.128  | LOC_Os03g18620.1 |
| DG <sub>PP</sub> | Os042550_01 | S2 | 1.277 | 1149.002  | 474.131  | LOC_Os02g32320.1 |
| DG <sub>PP</sub> | Os042924_01 | S2 | 1.406 | 927.513   | 350.108  | LOC_Os04g19870.1 |
| DG <sub>PP</sub> | Os011230_01 | S2 | 1.322 | 407.785   | 163.107  | LOC_Os08g10570.2 |
| DG <sub>PP</sub> | Os012005_01 | S2 | 2.217 | 1121.626  | 241.186  | LOC_Os03g58640.1 |
| DG <sub>PP</sub> | Os015161_01 | S2 | 2.019 | 450.835   | 111.253  | LOC_Os04g52500.1 |
| DG <sub>PP</sub> | Os045364_01 | S2 | 1.657 | 340.634   | 108.052  | LOC_Os09g01860.1 |
| DG <sub>PP</sub> | Os043530_01 | S2 | 1.612 | 5869.931  | 1920.801 | LOC_Os06g06340.1 |
| DG <sub>PP</sub> | Os043838_01 | S2 | 1.314 | 327.560   | 131.735  | LOC_Os05g14480.1 |
| DG <sub>PP</sub> | Os015144_01 | S2 | 2.618 | 12387.772 | 2017.614 | LOC_Os03g26650.2 |
| DG <sub>PP</sub> | Os017372_01 | S2 | 2.402 | 1425.861  | 269.731  | LOC_Os11g45720.1 |
| DG <sub>PP</sub> | Os048713_01 | S2 | 1.366 | 3309.079  | 1284.036 | LOC_Os11g27090.1 |
| DG <sub>PP</sub> | Os046160_01 | S2 | 1.300 | 1399.296  | 568.312  | LOC_Os07g32440.1 |
| DG <sub>PP</sub> | Os046890_01 | S2 | 1.271 | 908.887   | 376.584  | LOC_Os11g14740.1 |
| DG <sub>PP</sub> | Os022739_01 | S2 | 1.521 | 271.779   | 94.702   | LOC_Os08g07480.1 |
| DG <sub>PP</sub> | Os023830_01 | S2 | 1.281 | 1067.107  | 438.974  | LOC_Os02g40800.1 |
| DG <sub>PP</sub> | Os054056_01 | S2 | 1.557 | 1315.786  | 447.210  | LOC_Os07g03050.1 |
| DG <sub>PP</sub> | Os011320_01 | S2 | 1.488 | 591.853   | 210.965  | LOC_Os09g21810.1 |
| DG <sub>PP</sub> | Os011344_01 | S2 | 2.155 | 1173.029  | 263.304  | -                |
| DG <sub>PP</sub> | Os019816_01 | S2 | 1.345 | 244.700   | 96.355   | LOC_Os02g42640.1 |
| DG <sub>PP</sub> | Os020947_01 | S2 | 1.517 | 2105.323  | 735.877  | LOC_Os03g16500.2 |
| DG <sub>PP</sub> | Os023918_01 | S2 | 1.593 | 652.126   | 216.143  | LOC_Os05g12670.1 |
| DG <sub>PP</sub> | Os024982_01 | S2 | 1.729 | 2184.603  | 658.935  | LOC_Os08g05480.1 |
| DG <sub>PP</sub> | Os016152_01 | S2 | 1.323 | 518.420   | 207.218  | -                |
| DG <sub>PP</sub> | Os023616_01 | S2 | 1.555 | 404.420   | 137.681  | LOC_Os06g46740.1 |
| DG <sub>PP</sub> | Os024723_01 | S2 | 1.557 | 1498.227  | 509.186  | LOC_Os11g05490.1 |
| DG <sub>PP</sub> | Os016841_01 | S2 | 1.739 | 946.330   | 283.504  | LOC_Os07g33650.3 |
| DG <sub>PP</sub> | Os045108_01 | S2 | 1.326 | 386.815   | 154.289  | LOC_Os11g19950.1 |

|                  |             |    |       |           |          |                  |
|------------------|-------------|----|-------|-----------|----------|------------------|
| DG <sub>PP</sub> | Os048962_01 | S2 | 1.384 | 1571.781  | 602.409  | -                |
| DG <sub>PP</sub> | Os023209_01 | S2 | 1.434 | 941.939   | 348.654  | LOC_Os06g14670.1 |
| DG <sub>PP</sub> | Os017294_01 | S2 | 1.318 | 4256.597  | 1707.854 | -                |
| DG <sub>PP</sub> | Os019144_01 | S2 | 1.276 | 663.832   | 274.048  | LOC_Os07g10600.2 |
| DG <sub>PP</sub> | Os021083_01 | S2 | 1.331 | 4780.741  | 1899.873 | LOC_Os07g43290.1 |
| DG <sub>PP</sub> | Os052084_01 | S2 | 1.898 | 1061.643  | 284.808  | LOC_Os11g32650.1 |
| DG <sub>PP</sub> | Os023652_01 | S2 | 1.654 | 422.626   | 134.311  | LOC_Os04g52750.1 |
| DG <sub>PP</sub> | Os014307_01 | S2 | 1.630 | 809.647   | 261.652  | LOC_Os07g32630.1 |
| DG <sub>PP</sub> | Os049068_01 | S2 | 1.291 | 602.806   | 246.424  | -                |
| DG <sub>PP</sub> | Os019000_01 | S2 | 1.405 | 301.864   | 113.976  | LOC_Os08g02250.1 |
| DG <sub>PP</sub> | Os051859_01 | S2 | 3.712 | 1877.310  | 143.295  | -                |
| DG <sub>PP</sub> | Os047560_01 | S2 | 1.781 | 881.225   | 256.364  | LOC_Os07g12890.1 |
| DG <sub>PP</sub> | Os024460_01 | S2 | 1.387 | 1168.725  | 446.903  | LOC_Os09g39510.1 |
| DG <sub>PP</sub> | Os052838_01 | S2 | 1.309 | 2921.182  | 1179.143 | -                |
| DG <sub>PP</sub> | Os020946_01 | S2 | 1.781 | 386.400   | 112.409  | LOC_Os11g09180.2 |
| DG <sub>PP</sub> | Os013447_01 | S2 | 1.390 | 321.951   | 122.831  | LOC_Os02g34600.1 |
| DG <sub>PP</sub> | Os041794_01 | S2 | 1.552 | 348.401   | 118.801  | -                |
| DG <sub>PP</sub> | Os049649_01 | S2 | 1.662 | 398.197   | 125.813  | -                |
| DG <sub>PP</sub> | Os053751_01 | S2 | 1.413 | 298.304   | 112.036  | LOC_Os07g39810.1 |
| DG <sub>PP</sub> | Os044395_01 | S2 | 2.093 | 3154.148  | 739.374  | LOC_Os01g32630.1 |
| DG <sub>PP</sub> | Os014839_01 | S2 | 1.290 | 283.707   | 116.009  | LOC_Os03g54100.2 |
| DG <sub>PP</sub> | Os013556_01 | S2 | 1.334 | 263.194   | 104.390  | LOC_Os02g35560.1 |
| DG <sub>PP</sub> | Os044300_01 | S2 | 1.615 | 10131.427 | 3307.853 | LOC_Os05g11320.1 |
| DG <sub>PP</sub> | Os018264_01 | S2 | 2.724 | 2501.313  | 378.456  | LOC_Os08g41320.1 |
| DG <sub>PP</sub> | Os011561_01 | S2 | 1.476 | 1317.873  | 473.769  | LOC_Os09g10340.1 |
| DG <sub>PP</sub> | Os024393_01 | S2 | 1.684 | 812.917   | 252.925  | LOC_Os01g14960.1 |
| DG <sub>PP</sub> | Os015718_01 | S2 | 1.472 | 399.363   | 143.953  | LOC_Os11g05740.1 |
| DG <sub>PP</sub> | Os045207_01 | S2 | 1.284 | 968.302   | 397.745  | -                |
| DG <sub>PP</sub> | Os055155_01 | S2 | 1.474 | 729.891   | 262.829  | LOC_Os12g10220.1 |
| DG <sub>PP</sub> | Os017433_01 | S2 | 6.004 | 18899.282 | 294.415  | LOC_Os02g51570.1 |
| DG <sub>PP</sub> | Os023487_01 | S2 | 1.261 | 304.374   | 127.008  | LOC_Os03g25490.1 |

|                  |             |    |        |          |          |                  |
|------------------|-------------|----|--------|----------|----------|------------------|
| DG <sub>PP</sub> | Os055646_01 | S2 | 2.229  | 830.017  | 177.047  | LOC_Os12g29670.1 |
| DG <sub>PP</sub> | Os012754_01 | S2 | 1.272  | 240.610  | 99.651   | LOC_Os03g45400.1 |
| DG <sub>PP</sub> | Os025974_01 | S2 | 1.326  | 1127.359 | 449.556  | LOC_Os03g53060.1 |
| DG <sub>PP</sub> | Os017704_01 | S2 | 2.449  | 659.308  | 120.732  | LOC_Os02g07200.3 |
| DG <sub>PP</sub> | Os020363_01 | S2 | 2.021  | 568.489  | 140.027  | LOC_Os02g21260.1 |
| DG <sub>PP</sub> | Os013619_01 | S2 | 1.337  | 1854.617 | 734.230  | -                |
| DG <sub>PP</sub> | Os020208_01 | S2 | 1.429  | 244.063  | 90.619   | LOC_Os05g11730.1 |
| DG <sub>PP</sub> | Os016771_01 | S2 | 1.410  | 657.415  | 247.341  | LOC_Os07g37530.2 |
| DG <sub>PP</sub> | Os013058_01 | S2 | 1.600  | 379.223  | 125.085  | LOC_Os04g05010.1 |
| DG <sub>PP</sub> | Os020291_01 | S2 | 1.287  | 1715.420 | 702.917  | LOC_Os09g24640.1 |
| DG <sub>PP</sub> | Os053343_01 | S2 | 1.840  | 670.632  | 187.279  | LOC_Os03g25500.1 |
| DG <sub>PP</sub> | Os048756_01 | S2 | 2.815  | 762.188  | 108.290  | LOC_Os06g23780.1 |
| DG <sub>PP</sub> | Os013285_01 | S2 | 1.560  | 546.769  | 185.422  | LOC_Os04g46740.1 |
| DG <sub>PP</sub> | Os002373_01 | S2 | -1.031 | 239.599  | 489.469  | LOC_Os10g40390.1 |
| DG <sub>PP</sub> | Os030663_01 | S2 | -1.330 | 148.629  | 373.582  | LOC_Os03g62420.1 |
| DG <sub>PP</sub> | Os030681_01 | S2 | -1.082 | 238.417  | 504.701  | LOC_Os07g34390.1 |
| DG <sub>PP</sub> | Os030687_01 | S2 | -1.303 | 167.336  | 412.973  | LOC_Os03g28190.1 |
| DG <sub>PP</sub> | Os031821_01 | S2 | -1.242 | 134.300  | 317.574  | LOC_Os04g30750.1 |
| DG <sub>PP</sub> | Os000594_01 | S2 | -1.956 | 137.948  | 535.090  | LOC_Os04g29550.1 |
| DG <sub>PP</sub> | Os002419_01 | S2 | -1.062 | 170.632  | 356.318  | LOC_Os08g05530.1 |
| DG <sub>PP</sub> | Os030426_01 | S2 | -1.233 | 140.366  | 329.912  | LOC_Os08g37850.1 |
| DG <sub>PP</sub> | Os036862_01 | S2 | -1.045 | 245.187  | 505.747  | LOC_Os01g23760.1 |
| DG <sub>PP</sub> | Os026172_01 | S2 | -1.098 | 614.065  | 1314.373 | LOC_Os03g19170.1 |
| DG <sub>PP</sub> | Os029980_01 | S2 | -2.097 | 114.013  | 487.713  | LOC_Os02g42450.1 |
| DG <sub>PP</sub> | Os034944_01 | S2 | -1.621 | 176.916  | 544.229  | -                |
| DG <sub>PP</sub> | Os030972_01 | S2 | -1.064 | 388.610  | 812.642  | LOC_Os05g33870.1 |
| DG <sub>PP</sub> | Os035864_01 | S2 | -1.494 | 991.099  | 2791.736 | LOC_Os11g35120.1 |
| DG <sub>PP</sub> | Os001131_01 | S2 | -1.037 | 215.041  | 441.125  | LOC_Os07g43900.1 |
| DG <sub>PP</sub> | Os040122_01 | S2 | -1.107 | 171.178  | 368.739  | LOC_Os10g25040.1 |
| DG <sub>PP</sub> | Os028680_01 | S2 | -3.193 | 179.856  | 1645.210 | LOC_Os07g06100.1 |
| DG <sub>PP</sub> | Os008961_01 | S2 | -1.115 | 277.846  | 601.809  | -                |

|                  |             |    |        |          |           |                  |
|------------------|-------------|----|--------|----------|-----------|------------------|
| DG <sub>PP</sub> | Os010825_01 | S2 | -1.270 | 112.283  | 270.836   | LOC_Os03g46640.2 |
| DG <sub>PP</sub> | Os010073_01 | S2 | -2.505 | 284.179  | 1613.195  | LOC_Os07g40986.1 |
| DG <sub>PP</sub> | Os030543_01 | S2 | -1.010 | 4136.239 | 8330.665  | LOC_Os09g16240.1 |
| DG <sub>PP</sub> | Os004097_01 | S2 | -1.059 | 124.273  | 258.872   | LOC_Os12g12934.1 |
| DG <sub>PP</sub> | Os009220_01 | S2 | -1.120 | 161.893  | 351.755   | LOC_Os03g50210.1 |
| DG <sub>PP</sub> | Os010733_01 | S2 | -1.226 | 176.158  | 412.185   | -                |
| DG <sub>PP</sub> | Os057129_02 | S2 | -1.566 | 121.558  | 359.931   | -                |
| DG <sub>PP</sub> | Os030442_01 | S2 | -1.325 | 2015.025 | 5046.563  | LOC_Os06g10290.1 |
| DG <sub>PP</sub> | Os041088_01 | S2 | -1.383 | 185.406  | 483.452   | LOC_Os05g17110.1 |
| DG <sub>PP</sub> | Os030882_01 | S2 | -1.444 | 243.516  | 662.403   | LOC_Os02g57810.1 |
| DG <sub>PP</sub> | Os002004_01 | S2 | -1.006 | 231.570  | 465.141   | LOC_Os11g11810.1 |
| DG <sub>PP</sub> | Os008529_01 | S2 | -1.850 | 229.908  | 828.697   | LOC_Os07g02210.2 |
| DG <sub>PP</sub> | Os008954_01 | S2 | -1.109 | 385.979  | 832.477   | LOC_Os08g03390.1 |
| DG <sub>PP</sub> | Os056762_01 | S2 | -1.115 | 1178.898 | 2554.277  | LOC_Os03g39830.1 |
| DG <sub>PP</sub> | Os057402_02 | S2 | -1.135 | 307.243  | 674.535   | -                |
| DG <sub>PP</sub> | Os003180_01 | S2 | -1.476 | 108.422  | 301.521   | LOC_Os02g46690.1 |
| DG <sub>PP</sub> | Os032650_01 | S2 | -2.193 | 137.566  | 628.953   | -                |
| DG <sub>PP</sub> | Os035666_01 | S2 | -3.752 | 135.959  | 1831.742  | LOC_Os05g34210.1 |
| DG <sub>PP</sub> | Os002341_01 | S2 | -1.294 | 374.491  | 918.091   | LOC_Os11g09010.2 |
| DG <sub>PP</sub> | Os009547_01 | S2 | -1.177 | 180.377  | 407.847   | LOC_Os01g13570.1 |
| DG <sub>PP</sub> | Os026365_01 | S2 | -1.092 | 317.133  | 676.115   | LOC_Os02g56930.1 |
| DG <sub>PP</sub> | Os056638_01 | S2 | -1.153 | 176.446  | 392.460   | -                |
| DG <sub>PP</sub> | Os004343_01 | S2 | -1.407 | 219.900  | 583.246   | LOC_Os06g14030.1 |
| DG <sub>PP</sub> | Os005136_01 | S2 | -1.270 | 173.741  | 418.890   | LOC_Os04g31120.6 |
| DG <sub>PP</sub> | Os009448_01 | S2 | -1.296 | 5892.618 | 14471.962 | LOC_Os08g02630.1 |
| DG <sub>PP</sub> | Os009500_01 | S2 | -1.216 | 158.325  | 367.741   | LOC_Os08g32850.2 |
| DG <sub>PP</sub> | Os009518_01 | S2 | -1.172 | 5031.132 | 11337.086 | LOC_Os01g73250.1 |
| DG <sub>PP</sub> | Os002723_01 | S2 | -1.003 | 278.578  | 558.286   | -                |
| DG <sub>PP</sub> | Os029140_01 | S2 | -1.223 | 783.868  | 1829.168  | LOC_Os08g01520.1 |
| DG <sub>PP</sub> | Os003185_01 | S2 | -1.609 | 109.873  | 335.239   | LOC_Os03g08640.1 |
| DG <sub>PP</sub> | Os007873_01 | S2 | -1.096 | 393.283  | 840.449   | LOC_Os04g10940.1 |



|                  |             |    |        |          |           |                  |
|------------------|-------------|----|--------|----------|-----------|------------------|
| DG <sub>PP</sub> | Os009024_01 | S2 | -1.261 | 552.643  | 1324.264  | LOC_Os07g08710.2 |
| DG <sub>PP</sub> | Os028831_01 | S2 | -1.015 | 1906.481 | 3853.749  | LOC_Os11g07880.1 |
| DG <sub>PP</sub> | Os039430_01 | S2 | -2.338 | 338.052  | 1708.954  | LOC_Os08g07080.1 |
| DG <sub>PP</sub> | Os000431_01 | S2 | -1.123 | 8539.232 | 18598.622 | LOC_Os01g68300.1 |
| DG <sub>PP</sub> | Os032055_01 | S2 | -1.033 | 1187.343 | 2429.585  | LOC_Os06g15750.1 |
| DG <sub>PP</sub> | Os010292_01 | S2 | -1.222 | 2170.424 | 5064.050  | LOC_Os07g04960.1 |
| DG <sub>PP</sub> | Os057137_02 | S2 | -1.080 | 115.214  | 243.517   | -                |
| DG <sub>PP</sub> | Os057161_02 | S2 | -1.010 | 593.242  | 1194.894  | LOC_Os03g62170.1 |
| DG <sub>PP</sub> | Os039994_01 | S2 | -1.323 | 1026.218 | 2567.878  | LOC_Os07g04790.1 |
| DG <sub>PP</sub> | Os008853_01 | S2 | -1.216 | 227.477  | 528.388   | LOC_Os06g10620.1 |
| DG <sub>PP</sub> | Os038937_01 | S2 | -1.261 | 246.553  | 590.718   | LOC_Os06g41680.1 |
| DG <sub>PP</sub> | Os057321_02 | S2 | -1.243 | 118.122  | 279.648   | -                |
| DG <sub>PP</sub> | Os000149_01 | S2 | -1.078 | 393.932  | 831.599   | LOC_Os03g51960.1 |
| DG <sub>PP</sub> | Os029899_01 | S2 | -1.167 | 150.939  | 338.927   | LOC_Os09g39050.1 |
| DG <sub>PP</sub> | Os033669_01 | S2 | -1.001 | 184.759  | 369.824   | LOC_Os01g10810.1 |
| DG <sub>PP</sub> | Os035261_01 | S2 | -1.608 | 738.266  | 2250.562  | LOC_Os06g14324.1 |
| DG <sub>PP</sub> | Os035641_01 | S2 | -1.013 | 805.759  | 1625.699  | LOC_Os12g07860.1 |
| DG <sub>PP</sub> | Os009657_01 | S2 | -1.892 | 512.905  | 1903.777  | LOC_Os08g01140.1 |
| DG <sub>PP</sub> | Os009711_01 | S2 | -1.014 | 967.721  | 1954.353  | LOC_Os02g57030.1 |
| DG <sub>PP</sub> | Os057211_02 | S2 | -1.414 | 432.234  | 1151.482  | LOC_Os01g05970.1 |
| DG <sub>PP</sub> | Os030024_01 | S2 | -1.174 | 522.622  | 1178.888  | LOC_Os05g49310.1 |
| DG <sub>PP</sub> | Os006506_01 | S2 | -1.314 | 143.393  | 356.571   | LOC_Os02g06290.1 |
| DG <sub>PP</sub> | Os002304_01 | S2 | -1.269 | 546.554  | 1316.942  | LOC_Os02g13060.1 |
| DG <sub>PP</sub> | Os038164_01 | S2 | -1.246 | 145.216  | 344.346   | LOC_Os03g11670.1 |
| DG <sub>PP</sub> | Os027898_01 | S2 | -1.033 | 1791.111 | 3666.033  | LOC_Os07g43260.1 |
| DG <sub>PP</sub> | Os000311_01 | S2 | -1.221 | 151.402  | 352.956   | LOC_Os03g49170.1 |
| DG <sub>PP</sub> | Os035451_01 | S2 | -1.037 | 1357.406 | 2784.876  | LOC_Os01g51650.1 |
| DG <sub>PP</sub> | Os056923_02 | S2 | -1.649 | 109.460  | 343.304   | LOC_Os02g06584.2 |
| DG <sub>PP</sub> | Os057647_02 | S2 | -3.362 | 95.651   | 983.544   | -                |
| DG <sub>PP</sub> | Os027934_01 | S2 | -1.539 | 131.838  | 383.099   | LOC_Os06g06270.1 |
| DG <sub>PP</sub> | Os001058_01 | S2 | -1.003 | 362.058  | 725.519   | LOC_Os07g10540.1 |

|                  |             |    |        |           |           |                  |
|------------------|-------------|----|--------|-----------|-----------|------------------|
| DG <sub>PP</sub> | Os001606_01 | S2 | -1.027 | 1716.240  | 3497.698  | LOC_Os06g44450.1 |
| DG <sub>PP</sub> | Os008556_01 | S2 | -1.003 | 3047.467  | 6109.320  | LOC_Os02g44630.2 |
| DG <sub>PP</sub> | Os008934_01 | S2 | -1.347 | 246.582   | 627.401   | LOC_Os02g15640.1 |
| DG <sub>PP</sub> | Os008957_01 | S2 | -1.689 | 171.366   | 552.371   | LOC_Os09g29430.1 |
| DG <sub>PP</sub> | Os028782_01 | S2 | -1.116 | 312.915   | 678.065   | LOC_Os11g12810.1 |
| DG <sub>PP</sub> | Os005767_01 | S2 | -1.066 | 18623.435 | 38981.765 | LOC_Os02g47744.4 |
| DG <sub>PP</sub> | Os034084_01 | S2 | -1.035 | 122.691   | 251.359   | LOC_Os02g20280.1 |
| DG <sub>PP</sub> | Os029975_01 | S2 | -1.082 | 115.603   | 244.722   | -                |
| DG <sub>PP</sub> | Os002231_01 | S2 | -1.133 | 169.728   | 372.132   | -                |
| DG <sub>PP</sub> | Os003390_01 | S2 | -1.455 | 412.598   | 1131.117  | LOC_Os05g32390.1 |
| DG <sub>PP</sub> | Os009234_01 | S2 | -1.198 | 2640.032  | 6056.968  | LOC_Os08g06530.1 |
| DG <sub>PP</sub> | Os009562_01 | S2 | -1.225 | 1384.575  | 3236.178  | LOC_Os03g22270.1 |
| DG <sub>PP</sub> | Os009586_01 | S2 | -1.055 | 880.897   | 1830.568  | LOC_Os03g14040.3 |
| DG <sub>PP</sub> | Os009592_01 | S2 | -1.445 | 505.379   | 1375.536  | LOC_Os05g40180.1 |
| DG <sub>PP</sub> | Os026390_01 | S2 | -1.129 | 309.343   | 676.560   | LOC_Os05g25040.2 |
| DG <sub>PP</sub> | Os028705_01 | S2 | -1.084 | 237.199   | 502.982   | LOC_Os05g09400.1 |
| DG <sub>PP</sub> | Os056551_01 | S2 | -1.203 | 156.058   | 359.182   | LOC_Os08g37810.1 |
| DG <sub>PP</sub> | Os035088_01 | S2 | -1.411 | 934.635   | 2484.580  | LOC_Os05g04990.1 |
| DG <sub>PP</sub> | Os014879_01 | S2 | -3.070 | 171.769   | 1442.312  | LOC_Os10g40550.2 |
| DG <sub>PP</sub> | Os015656_01 | S2 | -1.586 | 304.908   | 915.257   | LOC_Os07g41280.3 |
| DG <sub>PP</sub> | Os016806_01 | S2 | -1.380 | 101.489   | 264.054   | LOC_Os02g39840.1 |
| DG <sub>PP</sub> | Os020954_01 | S2 | -2.208 | 78.567    | 363.006   | LOC_Os08g07840.3 |
| DG <sub>PP</sub> | Os051935_01 | S2 | -1.526 | 738.975   | 2127.481  | LOC_Os01g15270.1 |
| DG <sub>PP</sub> | Os013745_01 | S2 | -1.009 | 220.531   | 443.754   | LOC_Os04g47020.3 |
| DG <sub>PP</sub> | Os015750_01 | S2 | -2.927 | 88.004    | 669.256   | LOC_Os10g42870.1 |
| DG <sub>PP</sub> | Os053144_01 | S2 | -2.196 | 356.065   | 1631.006  | LOC_Os01g65169.1 |
| DG <sub>PP</sub> | Os015668_01 | S2 | -2.859 | 114.469   | 830.423   | LOC_Os01g72890.2 |
| DG <sub>PP</sub> | Os024276_01 | S2 | -1.146 | 1572.331  | 3478.361  | -                |
| DG <sub>PP</sub> | Os051824_01 | S2 | -1.078 | 91.832    | 193.862   | LOC_Os06g34300.1 |
| DG <sub>PP</sub> | Os044218_01 | S2 | -1.562 | 271.490   | 801.338   | LOC_Os01g24050.1 |
| DG <sub>PP</sub> | Os013356_01 | S2 | -2.269 | 240.144   | 1157.535  | LOC_Os07g40974.1 |

|                  |             |    |        |          |           |                  |
|------------------|-------------|----|--------|----------|-----------|------------------|
| DG <sub>PP</sub> | Os045347_01 | S2 | -2.042 | 417.781  | 1720.585  | LOC_Os06g18120.1 |
| DG <sub>PP</sub> | Os044515_01 | S2 | -1.229 | 233.360  | 546.946   | LOC_Os06g19130.1 |
| DG <sub>PP</sub> | Os047738_01 | S2 | -1.010 | 95.166   | 191.598   | LOC_Os09g12390.1 |
| DG <sub>PP</sub> | Os012415_01 | S2 | -1.171 | 507.730  | 1142.878  | LOC_Os03g57310.1 |
| DG <sub>PP</sub> | Os013541_01 | S2 | -2.395 | 134.176  | 705.633   | LOC_Os10g22510.1 |
| DG <sub>PP</sub> | Os014164_01 | S2 | -1.655 | 148.740  | 468.524   | LOC_Os04g57700.2 |
| DG <sub>PP</sub> | Os045565_01 | S2 | -4.373 | 302.214  | 6260.743  | LOC_Os10g09630.1 |
| DG <sub>PP</sub> | Os047459_01 | S2 | -1.108 | 630.632  | 1359.663  | LOC_Os01g12940.1 |
| DG <sub>PP</sub> | Os020633_01 | S2 | -1.090 | 181.764  | 386.918   | LOC_Os09g30120.1 |
| DG <sub>PP</sub> | Os053647_01 | S2 | -1.208 | 78.911   | 182.276   | LOC_Os08g19170.1 |
| DG <sub>PP</sub> | Os055497_01 | S2 | -1.017 | 76.389   | 154.561   | LOC_Os06g49030.1 |
| DG <sub>PP</sub> | Os012925_01 | S2 | -1.509 | 96.842   | 275.574   | LOC_Os01g58640.1 |
| DG <sub>PP</sub> | Os014057_01 | S2 | -1.064 | 108.137  | 226.055   | LOC_Os10g12354.1 |
| DG <sub>PP</sub> | Os044283_01 | S2 | -1.315 | 501.701  | 1248.025  | -                |
| DG <sub>PP</sub> | Os042994_01 | S2 | -1.167 | 172.537  | 387.413   | LOC_Os05g31090.1 |
| DG <sub>PP</sub> | Os017959_01 | S2 | -1.100 | 88.505   | 189.776   | LOC_Os11g34320.1 |
| DG <sub>PP</sub> | Os025045_01 | S2 | -1.143 | 105.736  | 233.548   | LOC_Os05g13790.1 |
| DG <sub>PP</sub> | Os041349_01 | S2 | -1.700 | 87.753   | 285.079   | LOC_Os08g09990.1 |
| DG <sub>PP</sub> | Os021187_01 | S2 | -1.532 | 976.065  | 2822.543  | LOC_Os03g49260.1 |
| DG <sub>PP</sub> | Os015095_01 | S2 | -1.304 | 182.352  | 450.245   | LOC_Os01g73450.1 |
| DG <sub>PP</sub> | Os021890_01 | S2 | -1.036 | 96.566   | 198.080   | LOC_Os08g10080.1 |
| DG <sub>PP</sub> | Os052203_01 | S2 | -1.314 | 114.163  | 283.817   | LOC_Os03g07480.2 |
| DG <sub>PP</sub> | Os011457_01 | S2 | -1.056 | 294.959  | 613.299   | LOC_Os05g47880.1 |
| DG <sub>PP</sub> | Os043831_01 | S2 | -1.210 | 133.125  | 308.035   | -                |
| DG <sub>PP</sub> | Os046222_01 | S2 | -1.084 | 101.943  | 216.137   | LOC_Os11g19340.1 |
| DG <sub>PP</sub> | Os023207_01 | S2 | -1.269 | 87.796   | 211.586   | LOC_Os07g37830.1 |
| DG <sub>PP</sub> | Os024274_01 | S2 | -2.743 | 309.280  | 2070.646  | LOC_Os08g07100.1 |
| DG <sub>PP</sub> | Os016132_01 | S2 | -2.090 | 176.172  | 750.238   | LOC_Os04g14190.1 |
| DG <sub>PP</sub> | Os016309_01 | S2 | -1.194 | 710.810  | 1626.077  | LOC_Os10g28360.1 |
| DG <sub>PP</sub> | Os042013_01 | S2 | -1.962 | 5017.977 | 19546.938 | LOC_Os08g19330.1 |
| DG <sub>PP</sub> | Os052123_01 | S2 | -1.337 | 577.587  | 1459.073  | LOC_Os06g04920.1 |

|                  |             |    |        |           |           |                  |
|------------------|-------------|----|--------|-----------|-----------|------------------|
| DG <sub>PP</sub> | Os052911_01 | S2 | -3.300 | 524.754   | 5168.331  | LOC_Os08g04500.1 |
| DG <sub>PP</sub> | Os018335_01 | S2 | -1.203 | 75.019    | 172.651   | -                |
| DG <sub>PP</sub> | Os041269_01 | S2 | -1.258 | 130.795   | 312.917   | LOC_Os10g01500.1 |
| DG <sub>PP</sub> | Os043716_01 | S2 | -1.073 | 256.806   | 540.181   | LOC_Os06g36530.1 |
| DG <sub>PP</sub> | Os021870_01 | S2 | -1.811 | 279.100   | 979.585   | LOC_Os07g41060.1 |
| DG <sub>PP</sub> | Os016030_01 | S2 | -1.056 | 3383.338  | 7033.014  | LOC_Os01g32780.1 |
| DG <sub>PP</sub> | Os047396_01 | S2 | -1.228 | 176.987   | 414.653   | LOC_Os05g02350.1 |
| DG <sub>PP</sub> | Os042462_01 | S2 | -1.179 | 12558.658 | 28439.316 | LOC_Os05g33320.1 |
| DG <sub>PP</sub> | Os042818_01 | S2 | -1.082 | 2544.477  | 5386.987  | LOC_Os06g15480.2 |
| DG <sub>PP</sub> | Os043715_01 | S2 | -1.173 | 122.112   | 275.245   | LOC_Os10g39070.1 |
| DG <sub>PP</sub> | Os049284_01 | S2 | -1.155 | 149.833   | 333.681   | LOC_Os01g05310.1 |
| DG <sub>PP</sub> | Os024737_01 | S2 | -1.218 | 121.771   | 283.350   | LOC_Os01g01660.1 |
| DG <sub>PP</sub> | Os044617_01 | S2 | -2.058 | 866.934   | 3609.704  | -                |
| DG <sub>PP</sub> | Os018221_01 | S2 | -1.457 | 930.686   | 2554.555  | -                |
| DG <sub>PP</sub> | Os001582_01 | S3 | 1.877  | 435.215   | 118.453   | -                |
| DG <sub>PP</sub> | Os031851_01 | S3 | 2.779  | 793.072   | 115.534   | LOC_Os01g47370.1 |
| DG <sub>PP</sub> | Os009286_01 | S3 | 1.848  | 785.284   | 218.206   | LOC_Os02g34860.1 |
| DG <sub>PP</sub> | Os039403_01 | S3 | 1.963  | 1570.169  | 402.806   | LOC_Os04g39380.1 |
| DG <sub>PP</sub> | Os028021_01 | S3 | 2.439  | 1626.494  | 299.946   | LOC_Os01g04670.1 |
| DG <sub>PP</sub> | Os029161_01 | S3 | 1.870  | 2230.115  | 610.278   | LOC_Os09g37460.1 |
| DG <sub>PP</sub> | Os056758_01 | S3 | 2.408  | 799.965   | 150.727   | -                |
| DG <sub>PP</sub> | Os010423_01 | S3 | 1.848  | 445.669   | 123.768   | -                |
| DG <sub>PP</sub> | Os034944_01 | S3 | 2.229  | 621.318   | 132.554   | -                |
| DG <sub>PP</sub> | Os010136_01 | S3 | 2.700  | 1484.563  | 228.472   | LOC_Os11g06730.1 |
| DG <sub>PP</sub> | Os041048_01 | S3 | 1.853  | 535.839   | 148.334   | -                |
| DG <sub>PP</sub> | Os000011_01 | S3 | 1.983  | 569.656   | 144.135   | -                |
| DG <sub>PP</sub> | Os000380_01 | S3 | 3.102  | 2334.250  | 271.797   | LOC_Os05g47540.1 |
| DG <sub>PP</sub> | Os001930_01 | S3 | 2.042  | 2243.701  | 544.889   | LOC_Os06g49640.1 |
| DG <sub>PP</sub> | Os039593_01 | S3 | 2.853  | 1350.998  | 186.954   | -                |
| DG <sub>PP</sub> | Os001855_01 | S3 | 2.554  | 606.961   | 103.366   | LOC_Os09g35020.1 |
| DG <sub>PP</sub> | Os038465_01 | S3 | 1.949  | 393.716   | 102.001   | LOC_Os08g31000.1 |

|                  |             |    |       |           |           |                  |
|------------------|-------------|----|-------|-----------|-----------|------------------|
| DG <sub>PP</sub> | Os040554_01 | S3 | 2.603 | 761.350   | 125.288   | LOC_Os04g54120.1 |
| DG <sub>PP</sub> | Os056703_01 | S3 | 2.252 | 744.513   | 156.299   | LOC_Os01g09150.1 |
| DG <sub>PP</sub> | Os057254_02 | S3 | 1.932 | 41180.030 | 10793.176 | -                |
| DG <sub>PP</sub> | Os031701_01 | S3 | 2.151 | 935.865   | 210.715   | LOC_Os01g24690.1 |
| DG <sub>PP</sub> | Os027497_01 | S3 | 3.191 | 747.551   | 81.874    | LOC_Os11g40860.1 |
| DG <sub>PP</sub> | Os056639_01 | S3 | 2.137 | 609.238   | 138.479   | LOC_Os01g32964.1 |
| DG <sub>PP</sub> | Os033589_01 | S3 | 2.301 | 684.841   | 138.941   | LOC_Os08g25240.1 |
| DG <sub>PP</sub> | Os009107_01 | S3 | 2.403 | 898.289   | 169.847   | LOC_Os02g50130.1 |
| DG <sub>PP</sub> | Os039978_01 | S3 | 2.055 | 406.687   | 97.846    | -                |
| DG <sub>PP</sub> | Os004519_01 | S3 | 2.355 | 793.558   | 155.091   | LOC_Os10g42510.1 |
| DG <sub>PP</sub> | Os035951_01 | S3 | 3.106 | 1712.067  | 198.873   | LOC_Os06g47960.1 |
| DG <sub>PP</sub> | Os008559_01 | S3 | 2.174 | 860.040   | 190.569   | LOC_Os05g51640.1 |
| DG <sub>PP</sub> | Os010037_01 | S3 | 2.266 | 502.796   | 104.503   | -                |
| DG <sub>PP</sub> | Os026158_01 | S3 | 1.873 | 762.837   | 208.188   | LOC_Os10g21130.1 |
| DG <sub>PP</sub> | Os029159_01 | S3 | 1.974 | 426.230   | 108.498   | -                |
| DG <sub>PP</sub> | Os056388_01 | S3 | 3.687 | 1366.750  | 106.084   | LOC_Os01g09710.1 |
| DG <sub>PP</sub> | Os002417_01 | S3 | 1.854 | 524.783   | 145.182   | LOC_Os06g10780.1 |
| DG <sub>PP</sub> | Os029966_01 | S3 | 2.497 | 582.334   | 103.180   | -                |
| DG <sub>PP</sub> | Os010869_01 | S3 | 1.967 | 561.526   | 143.645   | LOC_Os07g43020.1 |
| DG <sub>PP</sub> | Os030649_01 | S3 | 2.311 | 479.963   | 96.743    | -                |
| DG <sub>PP</sub> | Os030721_01 | S3 | 2.067 | 525.699   | 125.445   | LOC_Os04g43120.1 |
| DG <sub>PP</sub> | Os036777_01 | S3 | 3.027 | 887.543   | 108.870   | LOC_Os02g48920.1 |
| DG <sub>PP</sub> | Os002678_01 | S3 | 2.560 | 5788.930  | 981.952   | LOC_Os05g03920.1 |
| DG <sub>PP</sub> | Os030964_01 | S3 | 1.865 | 440.687   | 120.963   | LOC_Os11g18870.1 |
| DG <sub>PP</sub> | Os031754_01 | S3 | 1.851 | 447.320   | 123.978   | LOC_Os08g31070.1 |
| DG <sub>PP</sub> | Os032086_01 | S3 | 2.315 | 661.879   | 133.001   | LOC_Os06g10960.1 |
| DG <sub>PP</sub> | Os004073_01 | S3 | 2.740 | 680.830   | 101.911   | LOC_Os07g35240.1 |
| DG <sub>PP</sub> | Os006267_01 | S3 | 3.215 | 977.124   | 105.231   | LOC_Os05g46190.1 |
| DG <sub>PP</sub> | Os036266_01 | S3 | 2.756 | 646.914   | 95.779    | LOC_Os05g47850.1 |
| DG <sub>PP</sub> | Os036646_01 | S3 | 1.946 | 348.806   | 90.549    | -                |
| DG <sub>PP</sub> | Os035785_01 | S3 | 1.876 | 499.492   | 136.103   | LOC_Os09g30050.1 |

|                  |             |    |       |           |          |                  |
|------------------|-------------|----|-------|-----------|----------|------------------|
| DG <sub>PP</sub> | Os040755_01 | S3 | 2.969 | 798.139   | 101.964  | -                |
| DG <sub>PP</sub> | Os034016_01 | S3 | 2.545 | 574.728   | 98.508   | LOC_Os04g37940.1 |
| DG <sub>PP</sub> | Os056918_02 | S3 | 2.498 | 3081.512  | 545.623  | LOC_Os01g13690.1 |
| DG <sub>PP</sub> | Os037607_01 | S3 | 1.998 | 541.553   | 135.621  | LOC_Os01g02680.1 |
| DG <sub>PP</sub> | Os028837_01 | S3 | 1.909 | 884.747   | 235.509  | LOC_Os12g04970.1 |
| DG <sub>PP</sub> | Os034680_01 | S3 | 2.140 | 378.277   | 85.848   | LOC_Os05g04914.1 |
| DG <sub>PP</sub> | Os008783_01 | S3 | 2.064 | 579.672   | 138.636  | LOC_Os01g16890.1 |
| DG <sub>PP</sub> | Os010210_01 | S3 | 1.874 | 775.385   | 211.521  | LOC_Os07g42730.1 |
| DG <sub>PP</sub> | Os010115_01 | S3 | 2.264 | 3652.464  | 760.652  | LOC_Os09g36040.1 |
| DG <sub>PP</sub> | Os010948_01 | S3 | 3.171 | 2078.101  | 230.667  | LOC_Os03g03724.2 |
| DG <sub>PP</sub> | Os028605_01 | S3 | 2.925 | 3132.828  | 412.530  | LOC_Os02g06380.1 |
| DG <sub>PP</sub> | Os009386_01 | S3 | 1.993 | 776.271   | 194.985  | LOC_Os12g05920.1 |
| DG <sub>PP</sub> | Os056418_01 | S3 | 1.887 | 803.444   | 217.187  | LOC_Os09g11520.1 |
| DG <sub>PP</sub> | Os015656_01 | S3 | 1.892 | 504.613   | 135.923  | LOC_Os07g41280.3 |
| DG <sub>PP</sub> | Os014891_01 | S3 | 1.990 | 766.957   | 193.110  | LOC_Os03g01190.1 |
| DG <sub>PP</sub> | Os015668_01 | S3 | 1.913 | 761.651   | 202.222  | LOC_Os01g72890.2 |
| DG <sub>PP</sub> | Os016023_01 | S3 | 1.994 | 522.697   | 131.215  | LOC_Os11g38980.4 |
| DG <sub>PP</sub> | Os016770_01 | S3 | 2.036 | 1071.040  | 261.170  | LOC_Os07g30760.2 |
| DG <sub>PP</sub> | Os015361_01 | S3 | 2.719 | 769.768   | 116.876  | LOC_Os04g57550.1 |
| DG <sub>PP</sub> | Os015391_01 | S3 | 2.119 | 679.528   | 156.437  | LOC_Os09g07900.1 |
| DG <sub>PP</sub> | Os015744_01 | S3 | 3.287 | 2994.249  | 306.745  | LOC_Os04g54790.1 |
| DG <sub>PP</sub> | Os016512_01 | S3 | 2.200 | 503.051   | 109.471  | LOC_Os03g29760.2 |
| DG <sub>PP</sub> | Os016542_01 | S3 | 2.452 | 1003.327  | 183.370  | LOC_Os05g14270.1 |
| DG <sub>PP</sub> | Os017289_01 | S3 | 1.969 | 465.107   | 118.819  | LOC_Os12g31850.1 |
| DG <sub>PP</sub> | Os017295_01 | S3 | 2.152 | 1160.487  | 261.118  | LOC_Os03g17010.1 |
| DG <sub>PP</sub> | Os017639_01 | S3 | 2.010 | 1282.459  | 318.327  | LOC_Os02g28980.1 |
| DG <sub>PP</sub> | Os017662_01 | S3 | 2.334 | 913.520   | 181.127  | LOC_Os12g24080.1 |
| DG <sub>PP</sub> | Os018037_01 | S3 | 2.577 | 1247.442  | 209.083  | LOC_Os02g43790.1 |
| DG <sub>PP</sub> | Os021036_01 | S3 | 1.913 | 574.503   | 152.522  | LOC_Os01g23620.1 |
| DG <sub>PP</sub> | Os052021_01 | S3 | 2.600 | 1501.036  | 247.656  | LOC_Os12g05430.1 |
| DG <sub>PP</sub> | Os052085_01 | S3 | 2.728 | 21800.886 | 3290.245 | LOC_Os07g25430.3 |

|                  |             |    |       |           |          |                  |
|------------------|-------------|----|-------|-----------|----------|------------------|
| DG <sub>PP</sub> | Os052091_01 | S3 | 2.914 | 798.108   | 105.924  | LOC_Os07g08660.1 |
| DG <sub>PP</sub> | Os023232_01 | S3 | 2.854 | 510.483   | 70.605   | LOC_Os12g43750.1 |
| DG <sub>PP</sub> | Os023977_01 | S3 | 1.962 | 403.151   | 103.477  | LOC_Os06g43790.1 |
| DG <sub>PP</sub> | Os024766_01 | S3 | 2.053 | 1010.402  | 243.422  | LOC_Os03g64360.1 |
| DG <sub>PP</sub> | Os054607_01 | S3 | 2.612 | 852.614   | 139.493  | LOC_Os05g06780.1 |
| DG <sub>PP</sub> | Os054660_01 | S3 | 2.198 | 23099.878 | 5035.711 | LOC_Os04g41560.2 |
| DG <sub>PP</sub> | Os054977_01 | S3 | 2.061 | 891.456   | 213.638  | LOC_Os01g59970.1 |
| DG <sub>PP</sub> | Os054983_01 | S3 | 2.343 | 539.885   | 106.414  | LOC_Os05g33310.1 |
| DG <sub>PP</sub> | Os055024_01 | S3 | 1.874 | 2259.013  | 616.490  | LOC_Os04g53310.1 |
| DG <sub>PP</sub> | Os055030_01 | S3 | 2.159 | 371.152   | 83.132   | LOC_Os04g23180.1 |
| DG <sub>PP</sub> | Os044800_01 | S3 | 2.446 | 616.772   | 113.221  | LOC_Os08g31228.1 |
| DG <sub>PP</sub> | Os011646_01 | S3 | 1.893 | 321.732   | 86.633   | -                |
| DG <sub>PP</sub> | Os012023_01 | S3 | 2.104 | 790.616   | 183.911  | LOC_Os02g14770.3 |
| DG <sub>PP</sub> | Os012782_01 | S3 | 2.196 | 615.159   | 134.239  | LOC_Os05g49200.2 |
| DG <sub>PP</sub> | Os013109_01 | S3 | 2.173 | 796.481   | 176.657  | LOC_Os02g20310.3 |
| DG <sub>PP</sub> | Os013174_01 | S3 | 2.099 | 530.343   | 123.822  | LOC_Os09g10930.3 |
| DG <sub>PP</sub> | Os015561_01 | S3 | 1.902 | 508.865   | 136.163  | LOC_Os11g45730.2 |
| DG <sub>PP</sub> | Os024196_01 | S3 | 2.325 | 292.164   | 58.291   | LOC_Os08g03470.1 |
| DG <sub>PP</sub> | Os041986_01 | S3 | 2.202 | 337.234   | 73.313   | LOC_Os10g23160.1 |
| DG <sub>PP</sub> | Os044676_01 | S3 | 2.087 | 385.055   | 90.602   | LOC_Os06g32510.1 |
| DG <sub>PP</sub> | Os015845_01 | S3 | 1.915 | 1359.846  | 360.615  | LOC_Os05g03550.1 |
| DG <sub>PP</sub> | Os015579_01 | S3 | 2.546 | 684.500   | 117.201  | LOC_Os10g21000.1 |
| DG <sub>PP</sub> | Os015994_01 | S3 | 2.197 | 549.025   | 119.710  | -                |
| DG <sub>PP</sub> | Os045804_01 | S3 | 1.883 | 311.994   | 84.616   | LOC_Os06g01150.1 |
| DG <sub>PP</sub> | Os020848_01 | S3 | 2.012 | 351.811   | 87.248   | LOC_Os08g32600.1 |
| DG <sub>PP</sub> | Os021997_01 | S3 | 2.083 | 331.422   | 78.247   | LOC_Os03g52640.2 |
| DG <sub>PP</sub> | Os024184_01 | S3 | 2.097 | 384.392   | 89.859   | LOC_Os07g17970.1 |
| DG <sub>PP</sub> | Os043928_01 | S3 | 2.687 | 322.328   | 50.062   | LOC_Os09g04760.1 |
| DG <sub>PP</sub> | Os015150_01 | S3 | 2.785 | 4264.757  | 618.723  | LOC_Os06g41010.4 |
| DG <sub>PP</sub> | Os015839_01 | S3 | 1.901 | 1320.408  | 353.454  | LOC_Os02g35180.1 |
| DG <sub>PP</sub> | Os016284_01 | S3 | 2.124 | 2114.060  | 485.115  | LOC_Os05g34650.1 |

|                  |             |    |       |          |         |                  |
|------------------|-------------|----|-------|----------|---------|------------------|
| DG <sub>PP</sub> | Os016612_01 | S3 | 1.994 | 761.655  | 191.193 | LOC_Os07g09150.1 |
| DG <sub>PP</sub> | Os016966_01 | S3 | 2.508 | 3042.902 | 534.872 | LOC_Os04g32850.2 |
| DG <sub>PP</sub> | Os017780_01 | S3 | 1.882 | 666.005  | 180.639 | LOC_Os05g51180.1 |
| DG <sub>PP</sub> | Os021478_01 | S3 | 2.025 | 1168.409 | 287.090 | LOC_Os03g63950.1 |
| DG <sub>PP</sub> | Os043803_01 | S3 | 2.181 | 535.878  | 118.157 | LOC_Os04g20280.1 |
| DG <sub>PP</sub> | Os014758_01 | S3 | 2.106 | 879.076  | 204.167 | LOC_Os01g13120.1 |
| DG <sub>PP</sub> | Os050844_01 | S3 | 2.163 | 429.550  | 95.932  | LOC_Os04g46960.1 |
| DG <sub>PP</sub> | Os050850_01 | S3 | 2.370 | 539.580  | 104.409 | LOC_Os05g21240.1 |
| DG <sub>PP</sub> | Os019103_01 | S3 | 2.309 | 256.199  | 51.692  | LOC_Os02g45700.1 |
| DG <sub>PP</sub> | Os020259_01 | S3 | 2.352 | 344.806  | 67.554  | LOC_Os04g54370.1 |
| DG <sub>PP</sub> | Os020669_01 | S3 | 2.466 | 928.754  | 168.056 | LOC_Os03g16369.2 |
| DG <sub>PP</sub> | Os020994_01 | S3 | 4.182 | 1930.987 | 106.392 | LOC_Os01g49680.1 |
| DG <sub>PP</sub> | Os022149_01 | S3 | 1.958 | 531.025  | 136.705 | LOC_Os04g34100.1 |
| DG <sub>PP</sub> | Os022173_01 | S3 | 2.046 | 223.496  | 54.116  | -                |
| DG <sub>PP</sub> | Os050517_01 | S3 | 2.073 | 887.872  | 211.031 | LOC_Os12g26490.1 |
| DG <sub>PP</sub> | Os051657_01 | S3 | 2.872 | 432.600  | 59.091  | -                |
| DG <sub>PP</sub> | Os023988_01 | S3 | 2.237 | 286.954  | 60.889  | LOC_Os07g47284.1 |
| DG <sub>PP</sub> | Os024723_01 | S3 | 1.931 | 843.648  | 221.173 | LOC_Os11g05490.1 |
| DG <sub>PP</sub> | Os052762_01 | S3 | 1.894 | 269.411  | 72.476  | LOC_Os01g10580.1 |
| DG <sub>PP</sub> | Os055342_01 | S3 | 1.942 | 451.069  | 117.392 | LOC_Os05g01940.1 |
| DG <sub>PP</sub> | Os012391_01 | S3 | 1.974 | 410.875  | 104.603 | LOC_Os09g39420.1 |
| DG <sub>PP</sub> | Os015343_01 | S3 | 2.449 | 453.201  | 82.971  | LOC_Os06g44230.1 |
| DG <sub>PP</sub> | Os045518_01 | S3 | 2.018 | 702.479  | 173.465 | LOC_Os12g43390.1 |
| DG <sub>PP</sub> | Os045536_01 | S3 | 2.012 | 266.718  | 66.116  | LOC_Os03g58000.1 |
| DG <sub>PP</sub> | Os019399_01 | S3 | 2.254 | 315.854  | 66.205  | -                |
| DG <sub>PP</sub> | Os019405_01 | S3 | 2.011 | 343.775  | 85.291  | LOC_Os01g34560.1 |
| DG <sub>PP</sub> | Os020562_01 | S3 | 1.983 | 426.034  | 107.802 | LOC_Os05g45310.1 |
| DG <sub>PP</sub> | Os021319_01 | S3 | 1.864 | 1221.772 | 335.701 | LOC_Os05g41010.1 |
| DG <sub>PP</sub> | Os021719_01 | S3 | 3.066 | 731.745  | 87.349  | LOC_Os04g36620.2 |
| DG <sub>PP</sub> | Os021743_01 | S3 | 3.531 | 1033.862 | 89.444  | LOC_Os04g39980.1 |
| DG <sub>PP</sub> | Os022037_01 | S3 | 3.335 | 733.846  | 72.714  | LOC_Os01g06050.1 |



|                  |             |    |       |          |          |                  |
|------------------|-------------|----|-------|----------|----------|------------------|
| DG <sub>PP</sub> | Os022782_01 | S3 | 1.867 | 332.180  | 91.092   | LOC_Os06g47910.1 |
| DG <sub>PP</sub> | Os016558_01 | S3 | 1.943 | 420.125  | 109.229  | LOC_Os03g57500.1 |
| DG <sub>PP</sub> | Os017241_01 | S3 | 1.869 | 346.097  | 94.770   | LOC_Os01g11130.1 |
| DG <sub>PP</sub> | Os017667_01 | S3 | 2.184 | 890.538  | 196.034  | LOC_Os06g15360.1 |
| DG <sub>PP</sub> | Os047839_01 | S3 | 2.033 | 208.661  | 50.990   | LOC_Os12g26390.1 |
| DG <sub>PP</sub> | Os018767_01 | S3 | 2.295 | 980.788  | 199.806  | LOC_Os04g32050.1 |
| DG <sub>PP</sub> | Os018818_01 | S3 | 2.365 | 2661.653 | 516.769  | -                |
| DG <sub>PP</sub> | Os019192_01 | S3 | 2.123 | 322.780  | 74.116   | LOC_Os05g07650.1 |
| DG <sub>PP</sub> | Os019922_01 | S3 | 2.184 | 299.594  | 65.939   | LOC_Os04g01250.2 |
| DG <sub>PP</sub> | Os020247_01 | S3 | 1.914 | 280.277  | 74.395   | LOC_Os03g18410.1 |
| DG <sub>PP</sub> | Os020253_01 | S3 | 2.048 | 355.175  | 85.868   | LOC_Os08g43400.1 |
| DG <sub>PP</sub> | Os021077_01 | S3 | 2.318 | 448.475  | 89.969   | LOC_Os07g12830.2 |
| DG <sub>PP</sub> | Os021389_01 | S3 | 2.217 | 561.153  | 120.696  | LOC_Os03g60820.1 |
| DG <sub>PP</sub> | Os021454_01 | S3 | 2.387 | 1805.721 | 345.223  | LOC_Os03g37970.1 |
| DG <sub>PP</sub> | Os052067_01 | S3 | 2.733 | 1318.172 | 198.256  | -                |
| DG <sub>PP</sub> | Os052384_01 | S3 | 2.245 | 274.348  | 57.875   | LOC_Os06g50930.1 |
| DG <sub>PP</sub> | Os052461_01 | S3 | 2.006 | 4357.999 | 1085.347 | LOC_Os04g33110.1 |
| DG <sub>PP</sub> | Os023598_01 | S3 | 1.882 | 273.286  | 74.152   | LOC_Os09g12630.1 |
| DG <sub>PP</sub> | Os054606_01 | S3 | 2.124 | 293.198  | 67.240   | LOC_Os10g42299.3 |
| DG <sub>PP</sub> | Os011980_01 | S3 | 3.066 | 711.748  | 84.985   | LOC_Os01g42710.1 |
| DG <sub>PP</sub> | Os014307_01 | S3 | 1.903 | 665.989  | 178.041  | LOC_Os07g32630.1 |
| DG <sub>PP</sub> | Os014662_01 | S3 | 1.893 | 382.515  | 102.985  | LOC_Os03g17580.1 |
| DG <sub>PP</sub> | Os012955_01 | S3 | 2.076 | 931.478  | 220.954  | LOC_Os12g14440.1 |
| DG <sub>PP</sub> | Os048302_01 | S3 | 2.254 | 330.505  | 69.293   | LOC_Os07g47680.1 |
| DG <sub>PP</sub> | Os024080_01 | S3 | 2.278 | 225.269  | 46.456   | LOC_Os03g15380.1 |
| DG <sub>PP</sub> | Os017076_01 | S3 | 1.889 | 375.464  | 101.370  | -                |
| DG <sub>PP</sub> | Os048053_01 | S3 | 1.896 | 363.387  | 97.638   | -                |
| DG <sub>PP</sub> | Os019310_01 | S3 | 1.958 | 380.775  | 98.025   | LOC_Os02g32230.1 |
| DG <sub>PP</sub> | Os021272_01 | S3 | 1.997 | 339.766  | 85.091   | LOC_Os05g46210.1 |
| DG <sub>PP</sub> | Os048837_01 | S3 | 2.669 | 805.100  | 126.600  | LOC_Os10g06810.1 |
| DG <sub>PP</sub> | Os022685_01 | S3 | 2.968 | 540.313  | 69.077   | LOC_Os08g35900.2 |

|                  |             |    |       |           |          |                  |
|------------------|-------------|----|-------|-----------|----------|------------------|
| DG <sub>PP</sub> | Os011839_01 | S3 | 3.166 | 1530.957  | 170.547  | LOC_Os01g02060.2 |
| DG <sub>PP</sub> | Os015907_01 | S3 | 1.939 | 246.473   | 64.272   | LOC_Os01g40570.1 |
| DG <sub>PP</sub> | Os016235_01 | S3 | 1.856 | 578.407   | 159.759  | LOC_Os02g58150.2 |
| DG <sub>PP</sub> | Os047626_01 | S3 | 1.993 | 348.506   | 87.567   | LOC_Os05g41790.1 |
| DG <sub>PP</sub> | Os018882_01 | S3 | 2.164 | 1832.048  | 408.828  | LOC_Os03g27790.1 |
| DG <sub>PP</sub> | Os018906_01 | S3 | 2.041 | 472.619   | 114.865  | LOC_Os07g31450.1 |
| DG <sub>PP</sub> | Os020390_01 | S3 | 2.366 | 1225.048  | 237.675  | LOC_Os03g58070.1 |
| DG <sub>PP</sub> | Os021124_01 | S3 | 2.136 | 399.925   | 90.993   | LOC_Os02g57590.1 |
| DG <sub>PP</sub> | Os021549_01 | S3 | 2.080 | 1206.585  | 285.456  | LOC_Os02g58560.1 |
| DG <sub>PP</sub> | Os022278_01 | S3 | 2.275 | 273.798   | 56.572   | LOC_Os07g13470.1 |
| DG <sub>PP</sub> | Os052153_01 | S3 | 1.999 | 694.705   | 173.803  | LOC_Os03g14530.1 |
| DG <sub>PP</sub> | Os053245_01 | S3 | 2.277 | 339.706   | 70.073   | LOC_Os10g04770.1 |
| DG <sub>PP</sub> | Os053274_01 | S3 | 2.285 | 306.125   | 62.830   | LOC_Os04g36850.1 |
| DG <sub>PP</sub> | Os011722_01 | S3 | 2.043 | 611.944   | 148.508  | LOC_Os03g03390.1 |
| DG <sub>PP</sub> | Os013945_01 | S3 | 1.950 | 1555.689  | 402.751  | LOC_Os03g38950.1 |
| DG <sub>PP</sub> | Os047500_01 | S3 | 4.047 | 5103.033  | 308.657  | LOC_Os06g43740.1 |
| DG <sub>PP</sub> | Os048640_01 | S3 | 1.873 | 363.606   | 99.272   | LOC_Os01g54640.1 |
| DG <sub>PP</sub> | Os011662_01 | S3 | 2.348 | 3530.075  | 693.537  | LOC_Os07g34570.2 |
| DG <sub>PP</sub> | Os020199_01 | S3 | 2.765 | 363.152   | 53.432   | LOC_Os01g58690.1 |
| DG <sub>PP</sub> | Os022108_01 | S3 | 2.078 | 258.630   | 61.248   | -                |
| DG <sub>PP</sub> | Os016869_01 | S3 | 2.048 | 4642.844  | 1122.591 | LOC_Os01g08700.6 |
| DG <sub>PP</sub> | Os046770_01 | S3 | 2.787 | 408.965   | 59.272   | -                |
| DG <sub>PP</sub> | Os048242_01 | S3 | 2.571 | 337.150   | 56.736   | LOC_Os06g18950.1 |
| DG <sub>PP</sub> | Os019113_01 | S3 | 1.876 | 1470.931  | 400.718  | LOC_Os12g17910.1 |
| DG <sub>PP</sub> | Os021453_01 | S3 | 2.020 | 1541.329  | 380.012  | LOC_Os02g12760.1 |
| DG <sub>PP</sub> | Os052430_01 | S3 | 2.041 | 789.496   | 191.874  | LOC_Os07g29620.1 |
| DG <sub>PP</sub> | Os053478_01 | S3 | 2.102 | 336.328   | 78.319   | LOC_Os02g36950.2 |
| DG <sub>PP</sub> | Os012402_01 | S3 | 1.881 | 238.001   | 64.594   | LOC_Os01g43910.1 |
| DG <sub>PP</sub> | Os024793_01 | S3 | 1.852 | 407.593   | 112.879  | LOC_Os01g63190.1 |
| DG <sub>PP</sub> | Os044300_01 | S3 | 3.063 | 21361.559 | 2556.570 | LOC_Os05g11320.1 |
| DG <sub>PP</sub> | Os044585_01 | S3 | 1.949 | 374.926   | 97.123   | LOC_Os05g14360.1 |

|                  |             |    |       |          |          |                  |
|------------------|-------------|----|-------|----------|----------|------------------|
| DG <sub>PP</sub> | Os011561_01 | S3 | 3.556 | 1187.919 | 100.971  | LOC_Os09g10340.1 |
| DG <sub>PP</sub> | Os054592_01 | S3 | 2.068 | 596.577  | 142.320  | LOC_Os05g06310.1 |
| DG <sub>PP</sub> | Os054598_01 | S3 | 2.489 | 440.058  | 78.411   | LOC_Os01g07310.1 |
| DG <sub>PP</sub> | Os055334_01 | S3 | 2.086 | 514.067  | 121.092  | LOC_Os10g37240.1 |
| DG <sub>PP</sub> | Os016868_01 | S3 | 2.258 | 646.897  | 135.272  | LOC_Os01g51980.1 |
| DG <sub>PP</sub> | Os011626_01 | S3 | 2.737 | 1307.327 | 196.068  | LOC_Os02g15900.1 |
| DG <sub>PP</sub> | Os011643_01 | S3 | 1.872 | 803.511  | 219.585  | LOC_Os06g14420.1 |
| DG <sub>PP</sub> | Os017421_01 | S3 | 2.378 | 1785.341 | 343.445  | LOC_Os02g44590.1 |
| DG <sub>PP</sub> | Os048781_01 | S3 | 3.168 | 2210.579 | 246.009  | -                |
| DG <sub>PP</sub> | Os055155_01 | S3 | 3.269 | 1129.420 | 117.186  | LOC_Os12g10220.1 |
| DG <sub>PP</sub> | Os016233_01 | S3 | 2.179 | 360.024  | 79.489   | LOC_Os05g33150.1 |
| DG <sub>PP</sub> | Os046038_01 | S3 | 2.622 | 446.443  | 72.541   | LOC_Os10g26480.1 |
| DG <sub>PP</sub> | Os048716_01 | S3 | 2.103 | 277.075  | 64.505   | LOC_Os09g16590.1 |
| DG <sub>PP</sub> | Os054673_01 | S3 | 2.256 | 2837.491 | 594.112  | LOC_Os03g55540.1 |
| DG <sub>PP</sub> | Os051583_01 | S3 | 1.882 | 491.374  | 133.331  | -                |
| DG <sub>PP</sub> | Os055646_01 | S3 | 2.444 | 1693.501 | 311.304  | LOC_Os12g29670.1 |
| DG <sub>PP</sub> | Os011977_01 | S3 | 1.914 | 633.707  | 168.216  | LOC_Os01g71720.1 |
| DG <sub>PP</sub> | Os047260_01 | S3 | 1.917 | 6876.416 | 1820.659 | LOC_Os06g34840.1 |
| DG <sub>PP</sub> | Os055171_01 | S3 | 2.781 | 1724.488 | 250.933  | LOC_Os06g04230.1 |
| DG <sub>PP</sub> | Os012976_01 | S3 | 1.905 | 1845.021 | 492.501  | LOC_Os03g45230.1 |
| DG <sub>PP</sub> | Os025974_01 | S3 | 2.312 | 585.697  | 117.936  | LOC_Os03g53060.1 |
| DG <sub>PP</sub> | Os015593_01 | S3 | 2.744 | 1205.289 | 179.917  | LOC_Os08g26870.3 |
| DG <sub>PP</sub> | Os016274_01 | S3 | 2.055 | 305.970  | 73.611   | LOC_Os03g10920.1 |
| DG <sub>PP</sub> | Os018086_01 | S3 | 2.239 | 1178.070 | 249.483  | -                |
| DG <sub>PP</sub> | Os025968_01 | S3 | 1.848 | 1108.795 | 307.978  | LOC_Os08g16780.1 |
| DG <sub>PP</sub> | Os012864_01 | S3 | 1.927 | 1295.648 | 340.826  | LOC_Os04g35090.1 |
| DG <sub>PP</sub> | Os013589_01 | S3 | 2.185 | 811.601  | 178.538  | LOC_Os08g09270.1 |
| DG <sub>PP</sub> | Os054638_01 | S3 | 2.212 | 743.176  | 160.375  | -                |
| DG <sub>PP</sub> | Os011577_01 | S3 | 1.874 | 2631.376 | 717.926  | LOC_Os04g36040.1 |
| DG <sub>PP</sub> | Os013058_01 | S3 | 3.395 | 1286.175 | 122.234  | LOC_Os04g05010.1 |
| DG <sub>PP</sub> | Os021403_01 | S3 | 2.002 | 954.625  | 238.390  | LOC_Os07g04180.2 |

|                  |             |    |        |           |          |                  |
|------------------|-------------|----|--------|-----------|----------|------------------|
| DG <sub>PP</sub> | Os022863_01 | S3 | 2.023  | 219.219   | 53.936   | LOC_Os01g57350.1 |
| DG <sub>PP</sub> | Os054602_01 | S3 | 2.089  | 475.799   | 111.834  | LOC_Os08g35190.2 |
| DG <sub>PP</sub> | Os054432_01 | S3 | 1.936  | 9512.894  | 2485.754 | LOC_Os04g58200.1 |
| DG <sub>PP</sub> | Os048756_01 | S3 | 2.562  | 618.952   | 104.835  | LOC_Os06g23780.1 |
| DG <sub>PP</sub> | Os021485_01 | S3 | 2.167  | 414.913   | 92.370   | LOC_Os06g50818.1 |
| DG <sub>PP</sub> | Os043002_01 | S3 | 2.674  | 380.667   | 59.658   | LOC_Os08g36206.1 |
| DG <sub>PP</sub> | Os044196_01 | S3 | 1.892  | 1003.780  | 270.400  | LOC_Os05g32650.1 |
| DG <sub>PP</sub> | Os013976_01 | S3 | 1.906  | 10004.501 | 2669.855 | LOC_Os10g35370.2 |
| DG <sub>PP</sub> | Os020392_01 | S3 | 1.923  | 1906.539  | 502.735  | LOC_Os03g15050.2 |
| DG <sub>PP</sub> | Os021893_01 | S3 | 2.305  | 1514.079  | 306.291  | LOC_Os09g35030.1 |
| DG <sub>PP</sub> | Os055785_01 | S3 | 1.997  | 1057.381  | 264.960  | LOC_Os01g56220.1 |
| DG <sub>PP</sub> | Os001653_01 | S3 | -1.696 | 128.161   | 415.138  | LOC_Os04g52040.4 |
| DG <sub>PP</sub> | Os008602_01 | S3 | -1.687 | 495.134   | 1594.391 | LOC_Os05g06920.1 |
| DG <sub>PP</sub> | Os010814_01 | S3 | -1.699 | 105.165   | 341.423  | -                |
| DG <sub>PP</sub> | Os030028_01 | S3 | -1.835 | 138.116   | 492.589  | LOC_Os01g02710.1 |
| DG <sub>PP</sub> | Os001242_01 | S3 | -1.731 | 131.267   | 435.682  | LOC_Os01g08630.1 |
| DG <sub>PP</sub> | Os001981_01 | S3 | -2.659 | 101.512   | 641.288  | LOC_Os02g45920.1 |
| DG <sub>PP</sub> | Os030638_01 | S3 | -2.101 | 128.653   | 551.866  | LOC_Os12g08930.1 |
| DG <sub>PP</sub> | Os030710_01 | S3 | -1.698 | 119.149   | 386.550  | LOC_Os08g30590.1 |
| DG <sub>PP</sub> | Os033292_01 | S3 | -1.736 | 118.731   | 395.468  | LOC_Os01g24240.1 |
| DG <sub>PP</sub> | Os002092_01 | S3 | -1.708 | 491.262   | 1605.279 | LOC_Os02g04510.1 |
| DG <sub>PP</sub> | Os010073_01 | S3 | -1.720 | 383.718   | 1264.490 | LOC_Os07g40986.1 |
| DG <sub>PP</sub> | Os030947_01 | S3 | -1.767 | 88.746    | 302.113  | LOC_Os09g26480.1 |
| DG <sub>PP</sub> | Os035460_01 | S3 | -1.927 | 96.006    | 365.177  | -                |
| DG <sub>PP</sub> | Os008773_01 | S3 | -1.755 | 408.312   | 1378.084 | LOC_Os02g07160.1 |
| DG <sub>PP</sub> | Os010727_01 | S3 | -1.760 | 872.589   | 2956.380 | LOC_Os02g47620.2 |
| DG <sub>PP</sub> | Os010652_01 | S3 | -1.851 | 246.415   | 889.216  | -                |
| DG <sub>PP</sub> | Os001211_01 | S3 | -2.362 | 119.249   | 612.966  | LOC_Os04g42290.1 |
| DG <sub>PP</sub> | Os001287_01 | S3 | -1.994 | 123.846   | 493.169  | LOC_Os06g46240.1 |
| DG <sub>PP</sub> | Os001580_01 | S3 | -1.951 | 143.931   | 556.419  | LOC_Os03g43800.2 |
| DG <sub>PP</sub> | Os008529_01 | S3 | -1.677 | 267.444   | 854.903  | LOC_Os07g02210.2 |

|                  |             |    |        |           |           |                  |
|------------------|-------------|----|--------|-----------|-----------|------------------|
| DG <sub>PP</sub> | Os032953_01 | S3 | -1.755 | 149.319   | 503.842   | LOC_Os01g35310.1 |
| DG <sub>PP</sub> | Os007671_01 | S3 | -2.029 | 191.985   | 783.429   | LOC_Os07g28040.1 |
| DG <sub>PP</sub> | Os009124_01 | S3 | -1.669 | 12769.665 | 40618.441 | LOC_Os12g02310.1 |
| DG <sub>PP</sub> | Os009847_01 | S3 | -1.800 | 393.898   | 1371.472  | LOC_Os09g02710.1 |
| DG <sub>PP</sub> | Os001529_01 | S3 | -2.119 | 1262.598  | 5482.930  | LOC_Os01g60830.1 |
| DG <sub>PP</sub> | Os000540_01 | S3 | -1.631 | 135.351   | 419.356   | LOC_Os09g32470.1 |
| DG <sub>PP</sub> | Os003800_01 | S3 | -2.030 | 95.446    | 389.888   | LOC_Os02g08490.1 |
| DG <sub>PP</sub> | Os003843_01 | S3 | -1.770 | 92.900    | 316.770   | LOC_Os09g14520.1 |
| DG <sub>PP</sub> | Os009664_01 | S3 | -1.986 | 123.543   | 489.270   | LOC_Os03g04470.1 |
| DG <sub>PP</sub> | Os000586_01 | S3 | -1.813 | 123.952   | 435.509   | LOC_Os09g11510.1 |
| DG <sub>PP</sub> | Os009787_01 | S3 | -2.057 | 316.726   | 1318.209  | LOC_Os07g23120.1 |
| DG <sub>PP</sub> | Os000026_01 | S3 | -1.936 | 98.330    | 376.203   | LOC_Os09g24590.1 |
| DG <sub>PP</sub> | Os001539_01 | S3 | -1.968 | 125.967   | 492.868   | LOC_Os03g17410.1 |
| DG <sub>PP</sub> | Os032441_01 | S3 | -1.971 | 91.774    | 359.914   | LOC_Os03g29470.1 |
| DG <sub>PP</sub> | Os033249_01 | S3 | -1.874 | 120.078   | 440.032   | -                |
| DG <sub>PP</sub> | Os002516_02 | S3 | -1.730 | 123.447   | 409.477   | -                |
| DG <sub>PP</sub> | Os030108_01 | S3 | -1.746 | 509.388   | 1708.554  | LOC_Os06g37400.1 |
| DG <sub>PP</sub> | Os035048_01 | S3 | -1.632 | 119.794   | 371.367   | LOC_Os12g39220.1 |
| DG <sub>PP</sub> | Os028944_01 | S3 | -1.642 | 105.850   | 330.251   | -                |
| DG <sub>PP</sub> | Os000101_01 | S3 | -2.213 | 107.288   | 497.355   | LOC_Os06g37620.1 |
| DG <sub>PP</sub> | Os000119_01 | S3 | -1.798 | 135.497   | 471.055   | LOC_Os03g24339.1 |
| DG <sub>PP</sub> | Os000125_01 | S3 | -2.378 | 98.233    | 510.607   | LOC_Os05g40200.1 |
| DG <sub>PP</sub> | Os000844_01 | S3 | -2.269 | 120.629   | 581.250   | LOC_Os05g05220.1 |
| DG <sub>PP</sub> | Os001578_01 | S3 | -2.569 | 122.293   | 725.735   | -                |
| DG <sub>PP</sub> | Os001631_01 | S3 | -1.847 | 148.926   | 535.766   | LOC_Os03g16700.3 |
| DG <sub>PP</sub> | Os001655_01 | S3 | -2.784 | 100.689   | 693.567   | LOC_Os02g35010.1 |
| DG <sub>PP</sub> | Os029899_01 | S3 | -1.794 | 115.332   | 400.008   | LOC_Os09g39050.1 |
| DG <sub>PP</sub> | Os029917_01 | S3 | -2.403 | 91.814    | 485.614   | LOC_Os08g37590.1 |
| DG <sub>PP</sub> | Os031015_01 | S3 | -2.008 | 101.641   | 408.967   | -                |
| DG <sub>PP</sub> | Os031467_01 | S3 | -1.965 | 98.600    | 385.010   | LOC_Os02g36690.1 |
| DG <sub>PP</sub> | Os032535_01 | S3 | -2.562 | 109.463   | 646.301   | LOC_Os09g07320.1 |

|                  |             |    |        |          |           |                  |
|------------------|-------------|----|--------|----------|-----------|------------------|
| DG <sub>PP</sub> | Os008905_01 | S3 | -1.986 | 210.297  | 833.280   | LOC_Os06g37000.2 |
| DG <sub>PP</sub> | Os009705_01 | S3 | -1.754 | 136.753  | 461.139   | LOC_Os03g05280.1 |
| DG <sub>PP</sub> | Os029489_01 | S3 | -2.058 | 103.909  | 432.540   | LOC_Os02g57854.1 |
| DG <sub>PP</sub> | Os030344_01 | S3 | -2.048 | 163.078  | 674.268   | LOC_Os12g43820.1 |
| DG <sub>PP</sub> | Os030724_01 | S3 | -1.709 | 160.305  | 524.111   | -                |
| DG <sub>PP</sub> | Os009728_01 | S3 | -1.680 | 387.990  | 1242.953  | -                |
| DG <sub>PP</sub> | Os009774_01 | S3 | -2.274 | 99.093   | 479.340   | LOC_Os04g45090.1 |
| DG <sub>PP</sub> | Os008899_01 | S3 | -2.003 | 110.724  | 443.902   | LOC_Os08g39870.1 |
| DG <sub>PP</sub> | Os000400_01 | S3 | -1.871 | 192.885  | 705.572   | -                |
| DG <sub>PP</sub> | Os000424_01 | S3 | -2.247 | 116.967  | 555.044   | LOC_Os03g21080.1 |
| DG <sub>PP</sub> | Os001862_01 | S3 | -2.315 | 143.718  | 715.108   | LOC_Os01g66320.1 |
| DG <sub>PP</sub> | Os030944_01 | S3 | -1.641 | 170.346  | 531.306   | LOC_Os02g19790.1 |
| DG <sub>PP</sub> | Os030968_01 | S3 | -1.899 | 101.807  | 379.691   | -                |
| DG <sub>PP</sub> | Os034412_01 | S3 | -1.928 | 100.524  | 382.508   | LOC_Os06g12550.1 |
| DG <sub>PP</sub> | Os008486_01 | S3 | -1.689 | 199.564  | 643.411   | LOC_Os02g40730.1 |
| DG <sub>PP</sub> | Os008787_01 | S3 | -1.793 | 234.654  | 813.155   | LOC_Os02g47560.1 |
| DG <sub>PP</sub> | Os008811_01 | S3 | -1.793 | 105.293  | 364.901   | LOC_Os03g51220.1 |
| DG <sub>PP</sub> | Os009921_01 | S3 | -2.469 | 286.344  | 1585.465  | LOC_Os02g50620.1 |
| DG <sub>PP</sub> | Os038942_01 | S3 | -1.774 | 198.955  | 680.478   | LOC_Os08g37670.1 |
| DG <sub>PP</sub> | Os026391_01 | S3 | -1.747 | 118.703  | 398.444   | LOC_Os06g16260.1 |
| DG <sub>PP</sub> | Os056946_01 | S3 | -2.199 | 243.123  | 1116.512  | LOC_Os05g34770.1 |
| DG <sub>PP</sub> | Os001046_01 | S3 | -2.225 | 147.485  | 689.622   | LOC_Os03g02514.1 |
| DG <sub>PP</sub> | Os003610_01 | S3 | -1.639 | 156.790  | 488.431   | -                |
| DG <sub>PP</sub> | Os030873_01 | S3 | -1.664 | 132.909  | 421.048   | LOC_Os08g01640.1 |
| DG <sub>PP</sub> | Os007263_01 | S3 | -2.581 | 1921.936 | 11500.748 | LOC_Os12g33150.1 |
| DG <sub>PP</sub> | Os008740_01 | S3 | -3.281 | 876.399  | 8516.821  | LOC_Os04g45490.1 |
| DG <sub>PP</sub> | Os009446_01 | S3 | -1.769 | 116.838  | 398.272   | LOC_Os04g47420.1 |
| DG <sub>PP</sub> | Os010221_01 | S3 | -1.709 | 387.503  | 1266.582  | LOC_Os08g16810.1 |
| DG <sub>PP</sub> | Os038871_01 | S3 | -1.924 | 195.321  | 741.231   | LOC_Os12g12590.1 |
| DG <sub>PP</sub> | Os027785_01 | S3 | -2.259 | 382.660  | 1831.553  | LOC_Os03g61130.1 |
| DG <sub>PP</sub> | Os057481_02 | S3 | -1.737 | 124.842  | 416.200   | LOC_Os04g43390.1 |

|                  |             |    |        |          |           |                  |
|------------------|-------------|----|--------|----------|-----------|------------------|
| DG <sub>PP</sub> | Os057647_02 | S3 | -3.140 | 126.616  | 1116.065  | -                |
| DG <sub>PP</sub> | Os057659_02 | S3 | -1.719 | 161.130  | 530.557   | LOC_Os03g04110.1 |
| DG <sub>PP</sub> | Os009199_01 | S3 | -1.703 | 101.525  | 330.564   | LOC_Os12g02700.1 |
| DG <sub>PP</sub> | Os027934_01 | S3 | -1.672 | 114.216  | 363.919   | LOC_Os06g06270.1 |
| DG <sub>PP</sub> | Os000515_01 | S3 | -1.818 | 286.816  | 1011.071  | LOC_Os02g03010.1 |
| DG <sub>PP</sub> | Os008556_01 | S3 | -2.395 | 2182.051 | 11475.546 | LOC_Os02g44630.2 |
| DG <sub>PP</sub> | Os008886_01 | S3 | -1.964 | 371.366  | 1449.113  | LOC_Os11g10990.1 |
| DG <sub>PP</sub> | Os008928_01 | S3 | -1.694 | 116.341  | 376.320   | LOC_Os03g59710.1 |
| DG <sub>PP</sub> | Os010034_01 | S3 | -2.331 | 470.580  | 2367.358  | LOC_Os01g68940.1 |
| DG <sub>PP</sub> | Os010407_01 | S3 | -1.842 | 156.368  | 560.729   | LOC_Os08g08120.3 |
| DG <sub>PP</sub> | Os008668_01 | S3 | -2.445 | 276.103  | 1503.699  | LOC_Os11g04720.2 |
| DG <sub>PP</sub> | Os010501_01 | S3 | -3.000 | 248.125  | 1985.196  | LOC_Os09g26670.1 |
| DG <sub>PP</sub> | Os039107_01 | S3 | -1.694 | 126.554  | 409.390   | LOC_Os04g56800.1 |
| DG <sub>PP</sub> | Os057068_02 | S3 | -2.397 | 136.616  | 719.798   | LOC_Os08g04390.2 |
| DG <sub>PP</sub> | Os057433_02 | S3 | -1.721 | 118.043  | 389.092   | -                |
| DG <sub>PP</sub> | Os057614_02 | S3 | -2.192 | 112.019  | 511.801   | LOC_Os06g22060.1 |
| DG <sub>PP</sub> | Os029934_01 | S3 | -1.679 | 168.647  | 540.086   | LOC_Os09g13410.1 |
| DG <sub>PP</sub> | Os034470_01 | S3 | -2.239 | 107.661  | 508.256   | LOC_Os10g10420.1 |
| DG <sub>PP</sub> | Os008153_02 | S3 | -1.895 | 331.298  | 1232.415  | -                |
| DG <sub>PP</sub> | Os008538_01 | S3 | -2.205 | 518.177  | 2390.001  | LOC_Os03g18070.1 |
| DG <sub>PP</sub> | Os009346_01 | S3 | -1.771 | 845.301  | 2884.290  | LOC_Os03g52660.1 |
| DG <sub>PP</sub> | Os040526_01 | S3 | -1.826 | 141.729  | 502.493   | LOC_Os01g62680.1 |
| DG <sub>PP</sub> | Os026464_01 | S3 | -2.351 | 377.385  | 1925.812  | LOC_Os09g34100.1 |
| DG <sub>PP</sub> | Os027678_01 | S3 | -1.764 | 350.934  | 1191.970  | -                |
| DG <sub>PP</sub> | Os000423_01 | S3 | -2.022 | 221.607  | 899.803   | LOC_Os02g52860.1 |
| DG <sub>PP</sub> | Os000798_01 | S3 | -1.987 | 110.728  | 438.990   | LOC_Os07g01890.1 |
| DG <sub>PP</sub> | Os001925_01 | S3 | -2.170 | 158.588  | 713.484   | LOC_Os06g03860.1 |
| DG <sub>PP</sub> | Os003043_01 | S3 | -1.624 | 146.881  | 452.744   | LOC_Os03g39640.1 |
| DG <sub>PP</sub> | Os031721_01 | S3 | -3.001 | 98.835   | 791.004   | -                |
| DG <sub>PP</sub> | Os007729_01 | S3 | -1.629 | 143.716  | 444.581   | LOC_Os09g29380.1 |
| DG <sub>PP</sub> | Os009186_01 | S3 | -1.740 | 112.173  | 374.699   | LOC_Os04g36859.1 |

|                  |             |    |        |           |           |                  |
|------------------|-------------|----|--------|-----------|-----------|------------------|
| DG <sub>PP</sub> | Os009192_01 | S3 | -1.782 | 117.740   | 404.831   | LOC_Os01g50460.1 |
| DG <sub>PP</sub> | Os009234_01 | S3 | -1.709 | 1279.442  | 4183.205  | LOC_Os08g06530.1 |
| DG <sub>PP</sub> | Os009586_01 | S3 | -2.104 | 235.626   | 1013.250  | LOC_Os03g14040.3 |
| DG <sub>PP</sub> | Os009592_01 | S3 | -2.168 | 324.889   | 1459.573  | LOC_Os05g40180.1 |
| DG <sub>PP</sub> | Os010331_01 | S3 | -1.744 | 91.929    | 308.017   | LOC_Os02g46860.1 |
| DG <sub>PP</sub> | Os026390_01 | S3 | -2.278 | 153.555   | 744.657   | LOC_Os05g25040.2 |
| DG <sub>PP</sub> | Os008721_01 | S3 | -2.143 | 114.253   | 504.780   | LOC_Os03g17740.1 |
| DG <sub>PP</sub> | Os008745_01 | S3 | -2.106 | 311.632   | 1341.970  | LOC_Os06g05880.1 |
| DG <sub>PP</sub> | Os009844_01 | S3 | -2.488 | 2201.903  | 12351.941 | LOC_Os12g08730.1 |
| DG <sub>PP</sub> | Os041150_01 | S3 | -1.801 | 221.410   | 771.738   | LOC_Os06g43850.1 |
| DG <sub>PP</sub> | Os028616_01 | S3 | -2.356 | 193.347   | 989.692   | LOC_Os11g02440.2 |
| DG <sub>PP</sub> | Os009556_01 | S3 | -2.503 | 1012.907  | 5743.558  | LOC_Os03g59320.1 |
| DG <sub>PP</sub> | Os010372_01 | S3 | -3.370 | 4620.299  | 47758.151 | LOC_Os01g14410.1 |
| DG <sub>PP</sub> | Os010677_01 | S3 | -2.630 | 129.616   | 802.404   | -                |
| DG <sub>PP</sub> | Os046599_01 | S3 | -2.097 | 1509.743  | 6458.481  | LOC_Os07g33280.1 |
| DG <sub>PP</sub> | Os050067_01 | S3 | -1.652 | 1804.192  | 5668.371  | LOC_Os01g38720.1 |
| DG <sub>PP</sub> | Os051177_01 | S3 | -1.738 | 897.348   | 2992.294  | -                |
| DG <sub>PP</sub> | Os051935_01 | S3 | -2.060 | 715.890   | 2985.035  | LOC_Os01g15270.1 |
| DG <sub>PP</sub> | Os015046_01 | S3 | -1.745 | 627.711   | 2104.391  | LOC_Os03g29190.2 |
| DG <sub>PP</sub> | Os018049_01 | S3 | -2.586 | 485.646   | 2915.641  | LOC_Os03g49630.1 |
| DG <sub>PP</sub> | Os018378_01 | S3 | -2.841 | 872.336   | 6248.325  | LOC_Os08g02210.2 |
| DG <sub>PP</sub> | Os046332_01 | S3 | -2.223 | 11830.492 | 55230.288 | LOC_Os11g19180.1 |
| DG <sub>PP</sub> | Os047852_01 | S3 | -2.435 | 194.851   | 1053.995  | LOC_Os10g24050.1 |
| DG <sub>PP</sub> | Os019935_01 | S3 | -1.815 | 421.111   | 1481.366  | LOC_Os05g48700.1 |
| DG <sub>PP</sub> | Os051326_01 | S3 | -1.731 | 193.725   | 643.308   | LOC_Os05g35910.1 |
| DG <sub>PP</sub> | Os025816_01 | S3 | -2.370 | 164.522   | 850.244   | LOC_Os07g14610.1 |
| DG <sub>PP</sub> | Os017967_01 | S3 | -2.141 | 768.206   | 3388.500  | LOC_Os05g49880.1 |
| DG <sub>PP</sub> | Os018279_01 | S3 | -2.027 | 1078.117  | 4392.454  | LOC_Os09g04790.1 |
| DG <sub>PP</sub> | Os049669_01 | S3 | -1.635 | 247.859   | 769.892   | -                |
| DG <sub>PP</sub> | Os044729_01 | S3 | -1.934 | 105.878   | 404.700   | LOC_Os05g30200.1 |
| DG <sub>PP</sub> | Os046570_01 | S3 | -1.758 | 341.441   | 1154.727  | LOC_Os09g06330.1 |



|                  |             |    |        |          |           |                  |
|------------------|-------------|----|--------|----------|-----------|------------------|
| DG <sub>PP</sub> | Os015144_01 | S3 | -1.908 | 1489.034 | 5588.194  | LOC_Os03g26650.2 |
| DG <sub>PP</sub> | Os016594_01 | S3 | -2.001 | 1968.038 | 7875.318  | LOC_Os07g49100.1 |
| DG <sub>PP</sub> | Os046095_01 | S3 | -2.457 | 191.789  | 1053.077  | LOC_Os08g22700.1 |
| DG <sub>PP</sub> | Os020331_01 | S3 | -2.532 | 598.049  | 3458.889  | LOC_Os03g40650.1 |
| DG <sub>PP</sub> | Os050257_01 | S3 | -1.833 | 426.031  | 1517.968  | LOC_Os06g34800.1 |
| DG <sub>PP</sub> | Os046890_01 | S3 | -1.777 | 303.017  | 1038.406  | LOC_Os11g14740.1 |
| DG <sub>PP</sub> | Os044943_01 | S3 | -2.116 | 214.045  | 928.002   | LOC_Os07g47750.1 |
| DG <sub>PP</sub> | Os016076_01 | S3 | -2.164 | 135.367  | 606.515   | LOC_Os03g01260.1 |
| DG <sub>PP</sub> | Os017533_01 | S3 | -1.788 | 379.617  | 1311.390  | -                |
| DG <sub>PP</sub> | Os048190_01 | S3 | -1.915 | 161.862  | 610.262   | LOC_Os07g27970.1 |
| DG <sub>PP</sub> | Os025398_01 | S3 | -1.743 | 588.517  | 1970.133  | LOC_Os05g45410.1 |
| DG <sub>PP</sub> | Os016499_01 | S3 | -1.822 | 617.961  | 2184.480  | LOC_Os09g11370.1 |
| DG <sub>PP</sub> | Os045577_01 | S3 | -2.434 | 520.462  | 2812.283  | LOC_Os12g07990.1 |
| DG <sub>PP</sub> | Os055625_01 | S3 | -1.863 | 992.238  | 3608.514  | LOC_Os06g05070.1 |
| DG <sub>PP</sub> | Os045055_01 | S3 | -1.879 | 271.916  | 999.942   | -                |
| DG <sub>PP</sub> | Os019697_01 | S3 | -1.905 | 92.003   | 344.495   | -                |
| DG <sub>PP</sub> | Os020076_01 | S3 | -2.259 | 283.364  | 1356.637  | LOC_Os08g39380.1 |
| DG <sub>PP</sub> | Os022975_01 | S3 | -8.023 | 84.351   | 21942.424 | LOC_Os05g25540.1 |
| DG <sub>PP</sub> | Os044170_01 | S3 | -1.628 | 110.728  | 342.141   | LOC_Os01g40200.1 |
| DG <sub>PP</sub> | Os042994_01 | S3 | -1.761 | 148.019  | 501.683   | LOC_Os05g31090.1 |
| DG <sub>PP</sub> | Os016404_01 | S3 | -2.958 | 239.295  | 1859.832  | LOC_Os01g15610.1 |
| DG <sub>PP</sub> | Os016433_01 | S3 | -1.754 | 185.591  | 625.995   | LOC_Os04g15920.1 |
| DG <sub>PP</sub> | Os042441_01 | S3 | -2.310 | 357.153  | 1771.293  | LOC_Os06g13800.1 |
| DG <sub>PP</sub> | Os017305_01 | S3 | -2.096 | 192.276  | 822.016   | -                |
| DG <sub>PP</sub> | Os046306_01 | S3 | -1.700 | 2347.797 | 7629.437  | -                |
| DG <sub>PP</sub> | Os048236_01 | S3 | -1.774 | 264.475  | 904.336   | LOC_Os05g34740.1 |
| DG <sub>PP</sub> | Os024371_01 | S3 | -2.595 | 335.220  | 2025.861  | -                |
| DG <sub>PP</sub> | Os042180_01 | S3 | -1.813 | 162.621  | 571.424   | LOC_Os09g09430.1 |
| DG <sub>PP</sub> | Os045535_01 | S3 | -1.719 | 273.493  | 900.619   | -                |
| DG <sub>PP</sub> | Os015940_01 | S3 | -2.078 | 180.965  | 764.116   | LOC_Os07g28920.1 |
| DG <sub>PP</sub> | Os021606_01 | S3 | -1.960 | 537.466  | 2091.623  | LOC_Os09g21470.1 |

|                  |             |    |        |          |           |                  |
|------------------|-------------|----|--------|----------|-----------|------------------|
| DG <sub>PP</sub> | Os022377_01 | S3 | -1.845 | 97.833   | 351.531   | LOC_Os05g45750.1 |
| DG <sub>PP</sub> | Os015137_01 | S3 | -1.734 | 503.470  | 1674.580  | LOC_Os03g62410.1 |
| DG <sub>PP</sub> | Os045261_01 | S3 | -1.885 | 208.139  | 769.017   | LOC_Os02g34610.1 |
| DG <sub>PP</sub> | Os053001_01 | S3 | -1.744 | 344.955  | 1155.121  | LOC_Os08g36820.1 |
| DG <sub>PP</sub> | Os012586_01 | S3 | -1.713 | 251.717  | 825.509   | LOC_Os08g15444.1 |
| DG <sub>PP</sub> | Os015682_01 | S3 | -1.728 | 7398.723 | 24502.503 | LOC_Os01g18744.1 |
| DG <sub>PP</sub> | Os016026_01 | S3 | -1.915 | 216.200  | 815.086   | LOC_Os08g39970.1 |
| DG <sub>PP</sub> | Os018264_01 | S3 | -1.898 | 500.355  | 1865.059  | LOC_Os08g41320.1 |
| DG <sub>PP</sub> | Os020969_01 | S3 | -1.848 | 144.599  | 520.498   | LOC_Os08g08800.1 |
| DG <sub>PP</sub> | Os051938_01 | S3 | -1.809 | 123.604  | 433.131   | LOC_Os10g39410.1 |
| DG <sub>PP</sub> | Os016168_01 | S3 | -1.941 | 1598.914 | 6138.704  | LOC_Os02g39930.1 |
| DG <sub>PP</sub> | Os045207_01 | S3 | -2.546 | 348.701  | 2036.576  | -                |
| DG <sub>PP</sub> | Os022572_01 | S3 | -1.810 | 2345.467 | 8225.550  | LOC_Os12g36980.1 |
| DG <sub>PP</sub> | Os011667_01 | S3 | -1.821 | 105.475  | 372.629   | LOC_Os01g60430.1 |
| DG <sub>PP</sub> | Os016309_01 | S3 | -1.663 | 1734.160 | 5490.492  | LOC_Os10g28360.1 |
| DG <sub>PP</sub> | Os016716_01 | S3 | -1.726 | 2177.550 | 7205.219  | LOC_Os02g10120.1 |
| DG <sub>PP</sub> | Os017110_01 | S3 | -1.720 | 379.021  | 1248.892  | LOC_Os05g39000.1 |
| DG <sub>PP</sub> | Os045005_01 | S3 | -1.921 | 746.814  | 2828.470  | -                |
| DG <sub>PP</sub> | Os011450_01 | S3 | -2.130 | 302.476  | 1324.413  | LOC_Os01g72160.1 |
| DG <sub>PP</sub> | Os045664_01 | S3 | -2.808 | 345.258  | 2417.400  | LOC_Os02g25890.1 |
| DG <sub>PP</sub> | Os052955_01 | S3 | -1.871 | 582.192  | 2129.596  | LOC_Os01g54380.1 |
| DG <sub>PP</sub> | Os041241_01 | S3 | -2.072 | 161.040  | 677.112   | LOC_Os01g21270.1 |
| DG <sub>PP</sub> | Os021505_01 | S3 | -1.718 | 1237.341 | 4070.396  | LOC_Os02g51930.1 |
| DG <sub>PP</sub> | Os021877_01 | S3 | -1.953 | 112.798  | 436.606   | -                |
| DG <sub>PP</sub> | Os046233_01 | S3 | -1.638 | 138.841  | 432.256   | LOC_Os05g14430.1 |
| DG <sub>PP</sub> | Os046281_01 | S3 | -2.392 | 316.742  | 1662.829  | LOC_Os10g38640.1 |
| DG <sub>PP</sub> | Os018051_01 | S3 | -1.635 | 111.074  | 344.941   | LOC_Os06g35480.1 |
| DG <sub>PP</sub> | Os045972_01 | S3 | -2.710 | 120.424  | 788.032   | LOC_Os05g15220.1 |
| DG <sub>PP</sub> | Os023589_01 | S3 | -1.744 | 336.219  | 1126.455  | LOC_Os05g05650.1 |
| DG <sub>PP</sub> | Os055709_01 | S3 | -1.825 | 1571.747 | 5566.987  | LOC_Os12g41110.1 |
| DG <sub>PP</sub> | Os046251_01 | S3 | -1.935 | 186.759  | 713.963   | LOC_Os11g16850.1 |

|                  |             |    |        |          |           |                  |
|------------------|-------------|----|--------|----------|-----------|------------------|
| DG <sub>PP</sub> | Os054556_01 | S3 | -2.576 | 2848.823 | 16991.597 | LOC_Os01g14410.1 |
| DG <sub>PP</sub> | Os015605_01 | S3 | -2.338 | 1241.729 | 6279.142  | LOC_Os03g05620.1 |
| DG <sub>PP</sub> | Os052943_01 | S3 | -1.719 | 217.283  | 715.080   | LOC_Os01g45570.1 |
| DG <sub>PP</sub> | Os046857_01 | S3 | -2.282 | 372.856  | 1813.419  | LOC_Os02g38330.1 |
| DG <sub>PP</sub> | Os022257_01 | S3 | -2.112 | 105.144  | 454.479   | -                |
| DG <sub>PP</sub> | Os045064_01 | S3 | -1.729 | 120.522  | 399.518   | LOC_Os05g27490.1 |
| DG <sub>PP</sub> | Os045776_01 | S3 | -1.626 | 1332.615 | 4114.570  | LOC_Os02g28450.1 |
| DG <sub>PP</sub> | Os051737_01 | S3 | -1.714 | 163.788  | 537.153   | LOC_Os06g26050.1 |
| DG <sub>PP</sub> | Os017581_01 | S3 | -2.332 | 152.092  | 765.859   | LOC_Os04g39230.1 |
| DG <sub>PP</sub> | Os020996_01 | S3 | -2.918 | 196.259  | 1483.089  | LOC_Os02g07180.1 |
| DG <sub>PP</sub> | Os014934_01 | S3 | -1.650 | 1236.976 | 3881.124  | -                |
| DG <sub>PP</sub> | Os012417_01 | S3 | -2.203 | 226.790  | 1044.234  | LOC_Os04g47360.1 |
| DG <sub>PP</sub> | Os023778_01 | S3 | -1.824 | 236.787  | 838.562   | LOC_Os01g63010.1 |
| DG <sub>PP</sub> | Os047930_01 | S3 | -1.844 | 137.741  | 494.603   | LOC_Os11g34280.1 |
| DG <sub>PP</sub> | Os021120_01 | S3 | -1.943 | 132.587  | 509.693   | LOC_Os10g43075.1 |
| DG <sub>PP</sub> | Os021150_01 | S3 | -1.969 | 141.883  | 555.535   | LOC_Os03g27930.1 |
| DG <sub>PP</sub> | Os022274_01 | S3 | -2.034 | 115.461  | 472.865   | LOC_Os02g15160.1 |
| DG <sub>PP</sub> | Os022292_01 | S3 | -1.822 | 108.410  | 383.247   | LOC_Os11g35090.1 |
| DG <sub>PP</sub> | Os023373_01 | S3 | -1.627 | 126.944  | 392.229   | LOC_Os09g24350.1 |
| DG <sub>PP</sub> | Os023396_01 | S3 | -1.976 | 135.307  | 532.250   | -                |
| DG <sub>PP</sub> | Os025187_01 | S3 | -1.794 | 218.397  | 757.439   | -                |
| DG <sub>PP</sub> | Os010130_01 | S4 | 1.834  | 478.083  | 134.098   | LOC_Os02g13960.1 |
| DG <sub>PP</sub> | Os010028_01 | S4 | 2.128  | 4238.027 | 969.366   | LOC_Os05g26630.1 |
| DG <sub>PP</sub> | Os039819_01 | S4 | 2.035  | 793.479  | 193.561   | LOC_Os12g40260.1 |
| DG <sub>PP</sub> | Os008614_01 | S4 | 1.966  | 640.154  | 163.890   | LOC_Os05g49160.2 |
| DG <sub>PP</sub> | Os028716_01 | S4 | 3.057  | 654.475  | 78.628    | LOC_Os02g07320.1 |
| DG <sub>PP</sub> | Os029713_01 | S4 | 2.138  | 8561.171 | 1944.936  | LOC_Os07g30990.1 |
| DG <sub>PP</sub> | Os000440_01 | S4 | 2.008  | 3553.178 | 883.197   | LOC_Os04g52090.1 |
| DG <sub>PP</sub> | Os001090_01 | S4 | 2.340  | 359.988  | 71.081    | LOC_Os02g50370.1 |
| DG <sub>PP</sub> | Os001786_01 | S4 | 2.592  | 746.116  | 123.719   | LOC_Os02g09980.1 |
| DG <sub>PP</sub> | Os010171_01 | S4 | 2.475  | 1401.721 | 252.138   | -                |

|                  |             |    |       |          |         |                  |
|------------------|-------------|----|-------|----------|---------|------------------|
| DG <sub>PP</sub> | Os028062_01 | S4 | 2.378 | 747.938  | 143.922 | LOC_Os02g18800.1 |
| DG <sub>PP</sub> | Os029825_01 | S4 | 1.901 | 473.105  | 126.666 | LOC_Os01g40040.1 |
| DG <sub>PP</sub> | Os034759_01 | S4 | 3.284 | 6599.000 | 677.710 | LOC_Os04g13090.1 |
| DG <sub>PP</sub> | Os039580_01 | S4 | 2.691 | 1759.927 | 272.475 | LOC_Os02g40180.1 |
| DG <sub>PP</sub> | Os002353_01 | S4 | 2.345 | 1262.639 | 248.601 | LOC_Os03g38470.1 |
| DG <sub>PP</sub> | Os010037_01 | S4 | 1.971 | 629.969  | 160.709 | -                |
| DG <sub>PP</sub> | Os003566_01 | S4 | 2.247 | 595.802  | 125.541 | -                |
| DG <sub>PP</sub> | Os037234_01 | S4 | 2.844 | 1080.291 | 150.453 | LOC_Os07g11440.1 |
| DG <sub>PP</sub> | Os028144_01 | S4 | 1.892 | 267.794  | 72.168  | LOC_Os09g20490.1 |
| DG <sub>PP</sub> | Os029503_01 | S4 | 1.889 | 261.087  | 70.511  | LOC_Os02g55580.1 |
| DG <sub>PP</sub> | Os003255_01 | S4 | 3.782 | 1053.499 | 76.611  | LOC_Os03g39980.1 |
| DG <sub>PP</sub> | Os034271_01 | S4 | 1.902 | 657.648  | 175.951 | LOC_Os09g09230.1 |
| DG <sub>PP</sub> | Os010193_01 | S4 | 1.865 | 944.975  | 259.437 | LOC_Os12g34010.1 |
| DG <sub>PP</sub> | Os004399_01 | S4 | 2.802 | 2905.520 | 416.601 | LOC_Os02g40180.1 |
| DG <sub>PP</sub> | Os034181_01 | S4 | 1.903 | 300.660  | 80.403  | LOC_Os07g03190.1 |
| DG <sub>PP</sub> | Os008441_01 | S4 | 1.825 | 1357.710 | 383.213 | LOC_Os03g49190.1 |
| DG <sub>PP</sub> | Os026025_01 | S4 | 2.230 | 1026.865 | 218.847 | LOC_Os02g02930.1 |
| DG <sub>PP</sub> | Os039335_01 | S4 | 2.021 | 277.290  | 68.322  | LOC_Os04g01890.1 |
| DG <sub>PP</sub> | Os000954_01 | S4 | 1.852 | 843.678  | 233.669 | LOC_Os02g39350.1 |
| DG <sub>PP</sub> | Os009163_01 | S4 | 1.841 | 395.405  | 110.356 | LOC_Os02g05830.1 |
| DG <sub>PP</sub> | Os009921_01 | S4 | 2.407 | 1159.683 | 218.629 | LOC_Os02g50620.1 |
| DG <sub>PP</sub> | Os026407_01 | S4 | 2.410 | 313.375  | 58.953  | LOC_Os10g42754.1 |
| DG <sub>PP</sub> | Os038877_01 | S4 | 2.162 | 467.702  | 104.493 | LOC_Os01g29790.1 |
| DG <sub>PP</sub> | Os040011_01 | S4 | 2.079 | 319.851  | 75.688  | LOC_Os04g07930.1 |
| DG <sub>PP</sub> | Os040325_01 | S4 | 2.650 | 325.552  | 51.857  | LOC_Os08g43460.1 |
| DG <sub>PP</sub> | Os026320_01 | S4 | 2.610 | 468.510  | 76.747  | LOC_Os01g39780.1 |
| DG <sub>PP</sub> | Os000013_01 | S4 | 1.897 | 2138.525 | 574.189 | LOC_Os03g14980.2 |
| DG <sub>PP</sub> | Os031740_01 | S4 | 2.631 | 832.534  | 134.399 | LOC_Os07g05890.1 |
| DG <sub>PP</sub> | Os031764_01 | S4 | 1.958 | 541.820  | 139.448 | -                |
| DG <sub>PP</sub> | Os010501_01 | S4 | 1.918 | 471.383  | 124.706 | LOC_Os09g26670.1 |
| DG <sub>PP</sub> | Os031406_01 | S4 | 1.813 | 220.157  | 62.640  | LOC_Os11g18700.1 |

|                  |             |    |       |           |          |                  |
|------------------|-------------|----|-------|-----------|----------|------------------|
| DG <sub>PP</sub> | Os032588_01 | S4 | 1.852 | 181.138   | 50.182   | LOC_Os11g18490.1 |
| DG <sub>PP</sub> | Os001903_01 | S4 | 2.438 | 1116.143  | 205.973  | LOC_Os01g68290.1 |
| DG <sub>PP</sub> | Os038923_01 | S4 | 1.840 | 357.685   | 99.908   | LOC_Os11g05830.1 |
| DG <sub>PP</sub> | Os010261_01 | S4 | 2.242 | 417.238   | 88.202   | LOC_Os09g26390.1 |
| DG <sub>PP</sub> | Os008450_01 | S4 | 3.112 | 4049.994  | 468.422  | LOC_Os01g67980.1 |
| DG <sub>PP</sub> | Os010372_01 | S4 | 2.313 | 32216.657 | 6483.866 | LOC_Os01g14410.1 |
| DG <sub>PP</sub> | Os014879_01 | S4 | 1.965 | 465.755   | 119.278  | LOC_Os10g40550.2 |
| DG <sub>PP</sub> | Os015656_01 | S4 | 2.392 | 646.265   | 123.106  | LOC_Os07g41280.3 |
| DG <sub>PP</sub> | Os016806_01 | S4 | 1.967 | 519.508   | 132.918  | LOC_Os02g39840.1 |
| DG <sub>PP</sub> | Os016812_01 | S4 | 1.901 | 527.461   | 141.228  | LOC_Os02g17090.1 |
| DG <sub>PP</sub> | Os017955_01 | S4 | 2.426 | 444.967   | 82.812   | -                |
| DG <sub>PP</sub> | Os018309_01 | S4 | 2.178 | 376.116   | 83.118   | LOC_Os11g06190.1 |
| DG <sub>PP</sub> | Os048571_01 | S4 | 2.012 | 233.173   | 57.816   | -                |
| DG <sub>PP</sub> | Os019412_01 | S4 | 1.922 | 528.494   | 139.471  | LOC_Os04g56140.1 |
| DG <sub>PP</sub> | Os019787_01 | S4 | 2.287 | 822.405   | 168.524  | LOC_Os05g33100.1 |
| DG <sub>PP</sub> | Os020593_01 | S4 | 4.357 | 2562.143  | 125.058  | LOC_Os11g33090.1 |
| DG <sub>PP</sub> | Os020948_01 | S4 | 2.062 | 614.873   | 147.299  | LOC_Os04g46880.2 |
| DG <sub>PP</sub> | Os022032_01 | S4 | 4.379 | 3055.767  | 146.845  | LOC_Os08g02230.1 |
| DG <sub>PP</sub> | Os049705_01 | S4 | 2.794 | 540.123   | 77.890   | LOC_Os10g28810.1 |
| DG <sub>PP</sub> | Os051159_01 | S4 | 2.984 | 965.974   | 122.058  | -                |
| DG <sub>PP</sub> | Os053376_02 | S4 | 1.836 | 267.453   | 74.906   | -                |
| DG <sub>PP</sub> | Os054851_01 | S4 | 2.369 | 429.169   | 83.066   | LOC_Os01g17430.1 |
| DG <sub>PP</sub> | Os055268_01 | S4 | 2.137 | 419.357   | 95.355   | LOC_Os04g37430.1 |
| DG <sub>PP</sub> | Os055644_01 | S4 | 2.315 | 2211.992  | 444.442  | LOC_Os01g61400.1 |
| DG <sub>PP</sub> | Os016907_01 | S4 | 2.560 | 639.559   | 108.476  | LOC_Os11g40590.3 |
| DG <sub>PP</sub> | Os055383_01 | S4 | 1.841 | 288.558   | 80.548   | LOC_Os01g57470.1 |
| DG <sub>PP</sub> | Os017196_01 | S4 | 1.812 | 183.190   | 52.156   | LOC_Os03g45980.1 |
| DG <sub>PP</sub> | Os048559_01 | S4 | 1.922 | 271.689   | 71.694   | LOC_Os11g43390.1 |
| DG <sub>PP</sub> | Os019400_01 | S4 | 2.273 | 1397.183  | 289.000  | LOC_Os01g70790.1 |
| DG <sub>PP</sub> | Os025787_01 | S4 | 4.264 | 23473.327 | 1221.412 | LOC_Os12g04980.1 |
| DG <sub>PP</sub> | Os019947_01 | S4 | 2.061 | 364.197   | 87.252   | LOC_Os11g12050.2 |

|                  |             |    |       |           |          |                  |
|------------------|-------------|----|-------|-----------|----------|------------------|
| DG <sub>PP</sub> | Os049360_01 | S4 | 2.024 | 389.404   | 95.758   | LOC_Os09g22150.1 |
| DG <sub>PP</sub> | Os015585_01 | S4 | 1.937 | 552.872   | 144.377  | LOC_Os02g33490.1 |
| DG <sub>PP</sub> | Os015919_01 | S4 | 2.060 | 1165.453  | 279.465  | LOC_Os03g44010.2 |
| DG <sub>PP</sub> | Os017820_01 | S4 | 2.002 | 1269.155  | 316.947  | LOC_Os04g36062.1 |
| DG <sub>PP</sub> | Os018190_01 | S4 | 2.015 | 444.104   | 109.872  | LOC_Os01g43700.2 |
| DG <sub>PP</sub> | Os018196_01 | S4 | 2.181 | 872.117   | 192.298  | LOC_Os03g55070.2 |
| DG <sub>PP</sub> | Os018238_01 | S4 | 1.926 | 200.774   | 52.853   | LOC_Os11g07050.1 |
| DG <sub>PP</sub> | Os018989_01 | S4 | 2.742 | 1147.847  | 171.634  | LOC_Os02g56850.3 |
| DG <sub>PP</sub> | Os020450_01 | S4 | 1.990 | 653.615   | 164.506  | LOC_Os08g34950.1 |
| DG <sub>PP</sub> | Os052234_01 | S4 | 2.113 | 1424.245  | 329.260  | -                |
| DG <sub>PP</sub> | Os012229_01 | S4 | 2.129 | 463.101   | 105.894  | LOC_Os07g11060.2 |
| DG <sub>PP</sub> | Os054712_01 | S4 | 1.857 | 376.501   | 103.969  | LOC_Os03g60509.2 |
| DG <sub>PP</sub> | Os011816_01 | S4 | 1.970 | 710.426   | 181.379  | -                |
| DG <sub>PP</sub> | Os049479_01 | S4 | 1.934 | 263.712   | 69.037   | LOC_Os06g40410.1 |
| DG <sub>PP</sub> | Os043803_01 | S4 | 1.817 | 649.536   | 184.283  | LOC_Os04g20280.1 |
| DG <sub>PP</sub> | Os011344_01 | S4 | 1.899 | 1612.553  | 432.360  | -                |
| DG <sub>PP</sub> | Os017954_01 | S4 | 1.981 | 926.876   | 234.847  | LOC_Os08g04840.1 |
| DG <sub>PP</sub> | Os018314_01 | S4 | 1.958 | 1844.997  | 474.849  | LOC_Os01g50050.1 |
| DG <sub>PP</sub> | Os019086_01 | S4 | 1.932 | 459.539   | 120.460  | LOC_Os03g27800.1 |
| DG <sub>PP</sub> | Os051916_01 | S4 | 1.923 | 13385.812 | 3529.827 | LOC_Os06g46770.2 |
| DG <sub>PP</sub> | Os024630_01 | S4 | 1.830 | 355.685   | 100.073  | -                |
| DG <sub>PP</sub> | Os011874_01 | S4 | 2.305 | 1177.197  | 238.198  | LOC_Os03g47610.8 |
| DG <sub>PP</sub> | Os015378_01 | S4 | 1.873 | 466.411   | 127.320  | LOC_Os12g39970.4 |
| DG <sub>PP</sub> | Os011581_01 | S4 | 2.405 | 1219.595  | 230.218  | LOC_Os03g58580.1 |
| DG <sub>PP</sub> | Os049009_01 | S4 | 1.810 | 275.457   | 78.551   | LOC_Os05g44640.1 |
| DG <sub>PP</sub> | Os049051_01 | S4 | 2.134 | 250.163   | 56.995   | -                |
| DG <sub>PP</sub> | Os052084_01 | S4 | 4.042 | 1661.197  | 100.825  | LOC_Os11g32650.1 |
| DG <sub>PP</sub> | Os023673_01 | S4 | 2.108 | 356.319   | 82.677   | LOC_Os08g15420.1 |
| DG <sub>PP</sub> | Os014307_01 | S4 | 2.391 | 704.129   | 134.247  | LOC_Os07g32630.1 |
| DG <sub>PP</sub> | Os014662_01 | S4 | 2.140 | 494.338   | 112.190  | LOC_Os03g17580.1 |
| DG <sub>PP</sub> | Os015560_01 | S4 | 1.882 | 389.690   | 105.724  | LOC_Os07g41570.1 |

|                  |             |    |        |           |           |                  |
|------------------|-------------|----|--------|-----------|-----------|------------------|
| DG <sub>PP</sub> | Os021218_01 | S4 | 1.837  | 1053.882  | 295.043   | -                |
| DG <sub>PP</sub> | Os021555_01 | S4 | 2.014  | 474.284   | 117.456   | LOC_Os05g04530.1 |
| DG <sub>PP</sub> | Os012522_01 | S4 | 1.840  | 3844.052  | 1073.978  | LOC_Os08g09250.2 |
| DG <sub>PP</sub> | Os022024_01 | S4 | 2.007  | 1051.795  | 261.665   | LOC_Os02g03840.1 |
| DG <sub>PP</sub> | Os018766_01 | S4 | 1.911  | 2146.747  | 571.001   | LOC_Os04g40670.1 |
| DG <sub>PP</sub> | Os021788_01 | S4 | 2.280  | 524.009   | 107.870   | LOC_Os07g10480.1 |
| DG <sub>PP</sub> | Os013530_01 | S4 | 2.306  | 616.154   | 124.593   | LOC_Os08g30060.2 |
| DG <sub>PP</sub> | Os023817_01 | S4 | 1.947  | 300.342   | 77.891    | LOC_Os03g57900.1 |
| DG <sub>PP</sub> | Os024073_01 | S4 | 2.313  | 694.040   | 139.627   | -                |
| DG <sub>PP</sub> | Os044300_01 | S4 | 3.856  | 47812.906 | 3301.022  | LOC_Os05g11320.1 |
| DG <sub>PP</sub> | Os019079_01 | S4 | 2.162  | 389.347   | 87.000    | LOC_Os01g74510.1 |
| DG <sub>PP</sub> | Os017257_01 | S4 | 1.914  | 266.702   | 70.754    | LOC_Os06g40890.1 |
| DG <sub>PP</sub> | Os054428_01 | S4 | 1.853  | 292.988   | 81.131    | LOC_Os01g42860.1 |
| DG <sub>PP</sub> | Os017735_01 | S4 | 1.934  | 165.300   | 43.250    | LOC_Os04g20774.1 |
| DG <sub>PP</sub> | Os046816_01 | S4 | 1.988  | 204.927   | 51.662    | -                |
| DG <sub>PP</sub> | Os020666_01 | S4 | 2.209  | 325.328   | 70.340    | LOC_Os11g27400.1 |
| DG <sub>PP</sub> | Os051250_01 | S4 | 1.938  | 904.855   | 236.229   | -                |
| DG <sub>PP</sub> | Os055646_01 | S4 | 2.024  | 1870.485  | 459.759   | LOC_Os12g29670.1 |
| DG <sub>PP</sub> | Os015434_01 | S4 | 1.864  | 371.265   | 101.967   | LOC_Os09g38530.1 |
| DG <sub>PP</sub> | Os043734_01 | S4 | 2.070  | 228.714   | 54.453    | LOC_Os05g12220.1 |
| DG <sub>PP</sub> | Os016608_01 | S4 | 1.911  | 306.467   | 81.512    | LOC_Os06g24490.1 |
| DG <sub>PP</sub> | Os047936_01 | S4 | 1.983  | 275.933   | 69.794    | LOC_Os01g11770.1 |
| DG <sub>PP</sub> | Os000918_01 | S4 | -2.893 | 192.203   | 1427.755  | LOC_Os11g44960.1 |
| DG <sub>PP</sub> | Os035651_01 | S4 | -1.975 | 191.554   | 752.918   | LOC_Os05g04760.1 |
| DG <sub>PP</sub> | Os010382_01 | S4 | -2.871 | 206.737   | 1512.821  | LOC_Os05g45220.1 |
| DG <sub>PP</sub> | Os010388_01 | S4 | -2.030 | 140.964   | 575.816   | -                |
| DG <sub>PP</sub> | Os010435_01 | S4 | -5.080 | 276.207   | 9344.703  | LOC_Os04g36770.1 |
| DG <sub>PP</sub> | Os038999_01 | S4 | -1.934 | 244.909   | 936.154   | LOC_Os10g31250.1 |
| DG <sub>PP</sub> | Os035746_01 | S4 | -1.745 | 254.340   | 852.489   | -                |
| DG <sub>PP</sub> | Os010148_01 | S4 | -8.144 | 136.040   | 38480.253 | -                |
| DG <sub>PP</sub> | Os039112_01 | S4 | -1.966 | 4603.856  | 17992.126 | LOC_Os08g35360.1 |

|                  |             |    |        |          |           |                  |
|------------------|-------------|----|--------|----------|-----------|------------------|
| DG <sub>PP</sub> | Os030295_01 | S4 | -3.465 | 2246.705 | 24811.688 | LOC_Os12g08150.1 |
| DG <sub>PP</sub> | Os010400_01 | S4 | -5.844 | 175.214  | 10066.630 | LOC_Os07g38540.1 |
| DG <sub>PP</sub> | Os035734_01 | S4 | -2.052 | 7174.555 | 29761.372 | LOC_Os08g15180.1 |
| DG <sub>PP</sub> | Os010488_01 | S4 | -3.420 | 334.247  | 3576.480  | -                |
| DG <sub>PP</sub> | Os009925_01 | S4 | -2.636 | 141.022  | 876.793   | LOC_Os03g44000.1 |
| DG <sub>PP</sub> | Os009966_01 | S4 | -5.556 | 80.249   | 3776.592  | LOC_Os05g34710.1 |
| DG <sub>PP</sub> | Os010342_01 | S4 | -2.347 | 87.845   | 446.994   | LOC_Os09g37590.1 |
| DG <sub>PP</sub> | Os010623_01 | S4 | -8.109 | 127.622  | 35241.142 | LOC_Os04g42490.1 |
| DG <sub>PP</sub> | Os010946_01 | S4 | -1.933 | 171.517  | 654.815   | LOC_Os03g17200.1 |
| DG <sub>PP</sub> | Os009937_01 | S4 | -1.757 | 185.678  | 627.580   | LOC_Os05g34260.1 |
| DG <sub>PP</sub> | Os010001_01 | S4 | -2.886 | 332.192  | 2455.062  | LOC_Os08g02200.1 |
| DG <sub>PP</sub> | Os010330_01 | S4 | -2.303 | 307.059  | 1514.959  | -                |
| DG <sub>PP</sub> | Os028680_01 | S4 | -2.918 | 176.619  | 1334.953  | LOC_Os07g06100.1 |
| DG <sub>PP</sub> | Os010230_01 | S4 | -6.281 | 128.944  | 10025.907 | -                |
| DG <sub>PP</sub> | Os010254_01 | S4 | -3.679 | 159.568  | 2044.106  | LOC_Os06g46720.1 |
| DG <sub>PP</sub> | Os010260_01 | S4 | -3.605 | 138.728  | 1688.101  | -                |
| DG <sub>PP</sub> | Os010153_01 | S4 | -1.977 | 168.935  | 664.972   | LOC_Os02g43480.1 |
| DG <sub>PP</sub> | Os008896_01 | S4 | -1.746 | 233.492  | 783.088   | LOC_Os04g51520.1 |
| DG <sub>PP</sub> | Os010073_01 | S4 | -2.068 | 414.717  | 1739.253  | LOC_Os07g40986.1 |
| DG <sub>PP</sub> | Os010416_01 | S4 | -2.262 | 188.906  | 906.103   | LOC_Os08g04340.1 |
| DG <sub>PP</sub> | Os010446_01 | S4 | -3.400 | 183.134  | 1933.190  | LOC_Os04g56390.1 |
| DG <sub>PP</sub> | Os009948_01 | S4 | -3.256 | 115.765  | 1106.128  | LOC_Os04g41229.1 |
| DG <sub>PP</sub> | Os009971_01 | S4 | -8.284 | 169.436  | 52811.056 | LOC_Os03g05330.1 |
| DG <sub>PP</sub> | Os038565_01 | S4 | -1.805 | 92.367   | 322.657   | LOC_Os04g40780.1 |
| DG <sub>PP</sub> | Os028257_01 | S4 | -2.149 | 141.422  | 627.248   | LOC_Os03g15210.1 |
| DG <sub>PP</sub> | Os029421_01 | S4 | -3.106 | 117.650  | 1012.980  | LOC_Os12g41070.1 |
| DG <sub>PP</sub> | Os029427_01 | S4 | -2.004 | 162.042  | 649.992   | LOC_Os01g42410.1 |
| DG <sub>PP</sub> | Os057343_02 | S4 | -1.858 | 234.843  | 851.219   | LOC_Os03g01210.1 |
| DG <sub>PP</sub> | Os010646_01 | S4 | -8.905 | 85.698   | 41092.890 | LOC_Os03g55610.1 |
| DG <sub>PP</sub> | Os037668_01 | S4 | -2.545 | 2940.253 | 17165.011 | LOC_Os04g40120.1 |
| DG <sub>PP</sub> | Os001547_01 | S4 | -2.114 | 59.291   | 256.733   | LOC_Os07g01730.1 |



|                  |             |    |        |          |           |                  |
|------------------|-------------|----|--------|----------|-----------|------------------|
| DG <sub>PP</sub> | Os009936_01 | S4 | -2.333 | 139.957  | 705.283   | LOC_Os05g32190.1 |
| DG <sub>PP</sub> | Os030484_01 | S4 | -1.784 | 353.378  | 1216.881  | -                |
| DG <sub>PP</sub> | Os032941_01 | S4 | -2.640 | 117.542  | 732.466   | LOC_Os11g24200.1 |
| DG <sub>PP</sub> | Os033054_01 | S4 | -1.897 | 162.008  | 603.510   | -                |
| DG <sub>PP</sub> | Os035364_01 | S4 | -1.764 | 124.139  | 421.754   | LOC_Os07g29684.1 |
| DG <sub>PP</sub> | Os010152_01 | S4 | -2.444 | 116.616  | 634.634   | -                |
| DG <sub>PP</sub> | Os003577_01 | S4 | -2.248 | 156.504  | 743.419   | LOC_Os07g29750.1 |
| DG <sub>PP</sub> | Os030032_01 | S4 | -2.238 | 117.719  | 555.294   | LOC_Os06g48560.1 |
| DG <sub>PP</sub> | Os032258_01 | S4 | -1.860 | 220.054  | 798.634   | LOC_Os07g29340.1 |
| DG <sub>PP</sub> | Os033398_01 | S4 | -1.766 | 4844.179 | 16479.841 | LOC_Os12g23890.1 |
| DG <sub>PP</sub> | Os010492_01 | S4 | -3.762 | 119.891  | 1626.455  | LOC_Os04g46930.2 |
| DG <sub>PP</sub> | Os001934_01 | S4 | -3.223 | 128.519  | 1200.048  | -                |
| DG <sub>PP</sub> | Os002654_01 | S4 | -1.806 | 777.501  | 2718.776  | LOC_Os07g47070.1 |
| DG <sub>PP</sub> | Os030542_01 | S4 | -2.039 | 127.384  | 523.575   | LOC_Os11g08980.1 |
| DG <sub>PP</sub> | Os032864_01 | S4 | -1.946 | 125.418  | 483.296   | LOC_Os08g38260.1 |
| DG <sub>PP</sub> | Os032888_01 | S4 | -2.659 | 75.509   | 476.810   | LOC_Os11g37570.1 |
| DG <sub>PP</sub> | Os009964_01 | S4 | -4.053 | 159.270  | 2643.818  | LOC_Os09g20880.1 |
| DG <sub>PP</sub> | Os040796_01 | S4 | -1.962 | 147.932  | 576.508   | LOC_Os04g55400.1 |
| DG <sub>PP</sub> | Os040802_01 | S4 | -1.998 | 83.483   | 333.496   | LOC_Os08g23580.1 |
| DG <sub>PP</sub> | Os034319_01 | S4 | -2.054 | 222.700  | 924.573   | -                |
| DG <sub>PP</sub> | Os010217_01 | S4 | -4.518 | 109.284  | 2503.831  | LOC_Os08g06540.1 |
| DG <sub>PP</sub> | Os010568_01 | S4 | -2.530 | 110.453  | 637.859   | LOC_Os01g60260.2 |
| DG <sub>PP</sub> | Os009929_01 | S4 | -2.173 | 160.898  | 725.521   | LOC_Os02g31860.1 |
| DG <sub>PP</sub> | Os009935_01 | S4 | -2.545 | 2288.657 | 13354.758 | LOC_Os04g52060.1 |
| DG <sub>PP</sub> | Os035085_01 | S4 | -2.209 | 79.675   | 368.424   | LOC_Os09g37740.1 |
| DG <sub>PP</sub> | Os010211_01 | S4 | -2.852 | 182.198  | 1315.856  | LOC_Os10g41800.1 |
| DG <sub>PP</sub> | Os029876_01 | S4 | -2.595 | 99.629   | 602.077   | LOC_Os08g34890.1 |
| DG <sub>PP</sub> | Os029900_01 | S4 | -1.832 | 241.954  | 861.352   | -                |
| DG <sub>PP</sub> | Os030256_01 | S4 | -2.570 | 126.445  | 750.698   | LOC_Os02g20590.1 |
| DG <sub>PP</sub> | Os030630_01 | S4 | -2.169 | 144.045  | 647.831   | LOC_Os03g26470.1 |
| DG <sub>PP</sub> | Os030654_01 | S4 | -1.856 | 121.015  | 438.011   | LOC_Os02g30190.1 |

|                  |             |    |        |          |           |                  |
|------------------|-------------|----|--------|----------|-----------|------------------|
| DG <sub>PP</sub> | Os032940_01 | S4 | -2.057 | 95.244   | 396.296   | LOC_Os04g26250.1 |
| DG <sub>PP</sub> | Os032964_01 | S4 | -2.638 | 136.855  | 851.853   | LOC_Os11g47740.1 |
| DG <sub>PP</sub> | Os032982_01 | S4 | -2.302 | 124.778  | 615.287   | -                |
| DG <sub>PP</sub> | Os034098_01 | S4 | -2.179 | 140.261  | 635.166   | LOC_Os03g42870.1 |
| DG <sub>PP</sub> | Os034430_01 | S4 | -1.758 | 83.761   | 283.258   | LOC_Os03g47042.1 |
| DG <sub>PP</sub> | Os035262_01 | S4 | -2.480 | 118.700  | 662.106   | LOC_Os05g32060.1 |
| DG <sub>PP</sub> | Os036740_01 | S4 | -2.172 | 1033.580 | 4659.075  | -                |
| DG <sub>PP</sub> | Os009336_01 | S4 | -1.842 | 712.164  | 2553.083  | LOC_Os11g02730.1 |
| DG <sub>PP</sub> | Os039038_01 | S4 | -1.789 | 102.363  | 353.672   | -                |
| DG <sub>PP</sub> | Os027668_01 | S4 | -1.790 | 212.736  | 735.852   | LOC_Os02g16680.1 |
| DG <sub>PP</sub> | Os033029_01 | S4 | -1.936 | 123.443  | 472.486   | LOC_Os02g57740.1 |
| DG <sub>PP</sub> | Os033059_01 | S4 | -2.238 | 95.635   | 451.011   | LOC_Os03g43564.1 |
| DG <sub>PP</sub> | Os035357_01 | S4 | -2.044 | 91.784   | 378.443   | -                |
| DG <sub>PP</sub> | Os010145_01 | S4 | -3.292 | 137.037  | 1342.003  | -                |
| DG <sub>PP</sub> | Os010503_01 | S4 | -7.921 | 128.082  | 31044.783 | LOC_Os06g49690.1 |
| DG <sub>PP</sub> | Os030642_01 | S4 | -2.087 | 147.442  | 626.384   | LOC_Os02g53890.1 |
| DG <sub>PP</sub> | Os009787_01 | S4 | -2.928 | 270.966  | 2061.516  | LOC_Os07g23120.1 |
| DG <sub>PP</sub> | Os002299_01 | S4 | -2.062 | 190.393  | 794.922   | LOC_Os01g50830.1 |
| DG <sub>PP</sub> | Os002671_01 | S4 | -1.841 | 245.289  | 878.628   | LOC_Os03g51440.1 |
| DG <sub>PP</sub> | Os029829_01 | S4 | -4.436 | 83.001   | 1796.161  | LOC_Os05g40110.1 |
| DG <sub>PP</sub> | Os029853_01 | S4 | -4.882 | 123.403  | 3638.981  | LOC_Os04g28440.1 |
| DG <sub>PP</sub> | Os030155_01 | S4 | -4.940 | 165.288  | 5074.040  | LOC_Os02g14080.1 |
| DG <sub>PP</sub> | Os030993_01 | S4 | -2.473 | 338.510  | 1879.004  | -                |
| DG <sub>PP</sub> | Os031301_01 | S4 | -3.382 | 117.461  | 1224.743  | LOC_Os08g02710.1 |
| DG <sub>PP</sub> | Os032085_01 | S4 | -2.283 | 145.794  | 709.633   | LOC_Os06g10980.1 |
| DG <sub>PP</sub> | Os032435_01 | S4 | -4.735 | 123.696  | 3294.012  | LOC_Os03g56430.1 |
| DG <sub>PP</sub> | Os032441_01 | S4 | -2.477 | 190.922  | 1062.853  | LOC_Os03g29470.1 |
| DG <sub>PP</sub> | Os032459_01 | S4 | -2.533 | 96.981   | 561.184   | LOC_Os02g44560.1 |
| DG <sub>PP</sub> | Os032489_01 | S4 | -5.517 | 127.711  | 5849.591  | LOC_Os06g38080.1 |
| DG <sub>PP</sub> | Os032839_01 | S4 | -2.298 | 101.676  | 499.997   | LOC_Os10g21479.1 |
| DG <sub>PP</sub> | Os032863_01 | S4 | -1.791 | 234.089  | 810.266   | -                |

|                  |             |    |        |           |           |                  |
|------------------|-------------|----|--------|-----------|-----------|------------------|
| DG <sub>PP</sub> | Os032893_01 | S4 | -2.084 | 97.112    | 411.621   | LOC_Os06g32960.1 |
| DG <sub>PP</sub> | Os003727_01 | S4 | -2.406 | 140.799   | 746.121   | -                |
| DG <sub>PP</sub> | Os033653_01 | S4 | -2.032 | 106.649   | 436.088   | LOC_Os11g04870.1 |
| DG <sub>PP</sub> | Os034413_01 | S4 | -1.865 | 121.430   | 442.435   | LOC_Os03g35470.1 |
| DG <sub>PP</sub> | Os034745_01 | S4 | -1.890 | 93.807    | 347.695   | LOC_Os03g51990.1 |
| DG <sub>PP</sub> | Os035119_01 | S4 | -3.777 | 103.235   | 1415.493  | LOC_Os06g24000.1 |
| DG <sub>PP</sub> | Os010286_01 | S4 | -2.433 | 220.439   | 1190.308  | LOC_Os07g38990.1 |
| DG <sub>PP</sub> | Os032412_01 | S4 | -2.277 | 98.426    | 476.960   | LOC_Os01g11490.1 |
| DG <sub>PP</sub> | Os033172_01 | S4 | -2.234 | 236.986   | 1115.155  | LOC_Os03g31790.1 |
| DG <sub>PP</sub> | Os009517_01 | S4 | -1.841 | 10465.696 | 37495.581 | LOC_Os06g21590.1 |
| DG <sub>PP</sub> | Os010638_01 | S4 | -8.793 | 118.951   | 52778.127 | -                |
| DG <sub>PP</sub> | Os009934_01 | S4 | -1.898 | 242.306   | 902.843   | LOC_Os01g49230.1 |
| DG <sub>PP</sub> | Os010204_01 | S4 | -2.357 | 155.242   | 795.159   | LOC_Os11g13990.1 |
| DG <sub>PP</sub> | Os010602_01 | S4 | -1.850 | 99.637    | 359.212   | LOC_Os06g11720.1 |
| DG <sub>PP</sub> | Os032155_01 | S4 | -1.932 | 90.133    | 343.893   | LOC_Os10g02080.1 |
| DG <sub>PP</sub> | Os032909_01 | S4 | -2.519 | 82.690    | 473.882   | -                |
| DG <sub>PP</sub> | Os057211_02 | S4 | -1.825 | 417.001   | 1477.754  | LOC_Os01g05970.1 |
| DG <sub>PP</sub> | Os033390_01 | S4 | -1.971 | 113.941   | 446.705   | LOC_Os10g05500.1 |
| DG <sub>PP</sub> | Os010478_01 | S4 | -4.788 | 152.934   | 4225.654  | LOC_Os03g50110.1 |
| DG <sub>PP</sub> | Os010526_01 | S4 | -5.928 | 107.224   | 6526.942  | LOC_Os02g03430.1 |
| DG <sub>PP</sub> | Os008199_01 | S4 | -3.827 | 135.625   | 1925.403  | LOC_Os11g44990.1 |
| DG <sub>PP</sub> | Os010018_01 | S4 | -3.114 | 120.997   | 1047.257  | LOC_Os03g50130.1 |
| DG <sub>PP</sub> | Os026150_01 | S4 | -2.786 | 273.431   | 1886.239  | LOC_Os01g07620.1 |
| DG <sub>PP</sub> | Os010490_01 | S4 | -3.526 | 149.763   | 1724.887  | LOC_Os03g49480.1 |
| DG <sub>PP</sub> | Os032814_01 | S4 | -1.879 | 167.288   | 615.149   | LOC_Os06g24530.1 |
| DG <sub>PP</sub> | Os010291_01 | S4 | -3.371 | 189.502   | 1960.108  | LOC_Os01g48710.1 |
| DG <sub>PP</sub> | Os002952_01 | S4 | -2.298 | 132.110   | 649.721   | LOC_Os10g10750.1 |
| DG <sub>PP</sub> | Os033129_01 | S4 | -1.745 | 140.199   | 469.795   | LOC_Os03g36710.1 |
| DG <sub>PP</sub> | Os010215_01 | S4 | -2.150 | 133.354   | 591.692   | -                |
| DG <sub>PP</sub> | Os010244_01 | S4 | -8.427 | 137.544   | 47323.171 | -                |
| DG <sub>PP</sub> | Os010637_01 | S4 | -2.134 | 159.531   | 700.040   | LOC_Os01g51800.1 |

|                  |             |    |        |           |           |                  |
|------------------|-------------|----|--------|-----------|-----------|------------------|
| DG <sub>PP</sub> | Os057647_02 | S4 | -3.373 | 145.488   | 1507.323  | -                |
| DG <sub>PP</sub> | Os010326_01 | S4 | -4.423 | 86.996    | 1866.548  | LOC_Os07g43310.1 |
| DG <sub>PP</sub> | Os010344_01 | S4 | -4.130 | 112.285   | 1966.261  | LOC_Os04g53370.1 |
| DG <sub>PP</sub> | Os009287_01 | S4 | -2.956 | 508.694   | 3948.679  | LOC_Os01g16660.1 |
| DG <sub>PP</sub> | Os010407_01 | S4 | -1.998 | 429.134   | 1714.660  | LOC_Os08g08120.3 |
| DG <sub>PP</sub> | Os010424_01 | S4 | -6.070 | 525.150   | 35292.105 | LOC_Os03g15080.2 |
| DG <sub>PP</sub> | Os010125_01 | S4 | -3.154 | 160.836   | 1432.069  | LOC_Os07g06600.1 |
| DG <sub>PP</sub> | Os010477_01 | S4 | -1.934 | 217.454   | 830.997   | -                |
| DG <sub>PP</sub> | Os034108_01 | S4 | -3.601 | 118.671   | 1440.250  | LOC_Os07g27850.1 |
| DG <sub>PP</sub> | Os000271_01 | S4 | -1.871 | 264.202   | 966.739   | LOC_Os02g22100.7 |
| DG <sub>PP</sub> | Os010179_01 | S4 | -1.863 | 119.337   | 434.030   | LOC_Os09g30410.1 |
| DG <sub>PP</sub> | Os031745_01 | S4 | -2.635 | 3188.687  | 19808.633 | -                |
| DG <sub>PP</sub> | Os009967_01 | S4 | -3.236 | 130.322   | 1227.577  | LOC_Os02g32450.1 |
| DG <sub>PP</sub> | Os010290_01 | S4 | -2.594 | 153.002   | 923.460   | LOC_Os03g09880.1 |
| DG <sub>PP</sub> | Os010355_01 | S4 | -7.464 | 180.603   | 31883.952 | -                |
| DG <sub>PP</sub> | Os039707_01 | S4 | -2.004 | 139.641   | 559.973   | -                |
| DG <sub>PP</sub> | Os026385_01 | S4 | -1.974 | 11749.449 | 46152.313 | LOC_Os02g44780.3 |
| DG <sub>PP</sub> | Os035913_01 | S4 | -1.982 | 68.188    | 269.286   | LOC_Os10g21550.1 |
| DG <sub>PP</sub> | Os008421_01 | S4 | -1.750 | 174.931   | 588.310   | LOC_Os07g48820.2 |
| DG <sub>PP</sub> | Os000322_01 | S4 | -2.198 | 449.951   | 2065.001  | LOC_Os07g28610.2 |
| DG <sub>PP</sub> | Os001428_01 | S4 | -1.745 | 195.773   | 655.997   | LOC_Os11g33320.1 |
| DG <sub>PP</sub> | Os010583_01 | S4 | -6.086 | 114.722   | 7792.635  | LOC_Os08g21330.2 |
| DG <sub>PP</sub> | Os010606_01 | S4 | -5.568 | 190.094   | 9020.575  | LOC_Os10g02490.2 |
| DG <sub>PP</sub> | Os024736_01 | S4 | -1.747 | 2699.792  | 9065.157  | LOC_Os03g63540.1 |
| DG <sub>PP</sub> | Os025103_01 | S4 | -2.062 | 406.469   | 1697.166  | LOC_Os07g34920.1 |
| DG <sub>PP</sub> | Os013356_01 | S4 | -1.909 | 256.409   | 963.084   | LOC_Os07g40974.1 |
| DG <sub>PP</sub> | Os048713_01 | S4 | -1.851 | 534.776   | 1928.644  | LOC_Os11g27090.1 |
| DG <sub>PP</sub> | Os021841_01 | S4 | -2.033 | 547.081   | 2238.756  | LOC_Os08g36410.1 |
| DG <sub>PP</sub> | Os050257_01 | S4 | -1.825 | 848.512   | 3006.005  | LOC_Os06g34800.1 |
| DG <sub>PP</sub> | Os054741_01 | S4 | -3.685 | 177.272   | 2279.495  | -                |
| DG <sub>PP</sub> | Os014740_01 | S4 | -1.751 | 1908.198  | 6421.947  | LOC_Os07g36080.1 |

|                  |             |    |        |          |          |                  |
|------------------|-------------|----|--------|----------|----------|------------------|
| DG <sub>PP</sub> | Os046890_01 | S4 | -1.886 | 637.332  | 2356.166 | LOC_Os11g14740.1 |
| DG <sub>PP</sub> | Os045347_01 | S4 | -2.286 | 306.513  | 1494.423 | LOC_Os06g18120.1 |
| DG <sub>PP</sub> | Os016152_01 | S4 | -1.936 | 874.575  | 3347.606 | -                |
| DG <sub>PP</sub> | Os045577_01 | S4 | -2.440 | 1138.655 | 6179.461 | LOC_Os12g07990.1 |
| DG <sub>PP</sub> | Os013541_01 | S4 | -2.017 | 119.919  | 485.252  | LOC_Os10g22510.1 |
| DG <sub>PP</sub> | Os014602_01 | S4 | -1.849 | 171.092  | 616.205  | -                |
| DG <sub>PP</sub> | Os022442_01 | S4 | -3.003 | 126.988  | 1018.231 | -                |
| DG <sub>PP</sub> | Os045565_01 | S4 | -3.801 | 265.063  | 3693.918 | LOC_Os10g09630.1 |
| DG <sub>PP</sub> | Os047459_01 | S4 | -2.572 | 745.318  | 4430.438 | LOC_Os01g12940.1 |
| DG <sub>PP</sub> | Os041255_01 | S4 | -2.642 | 62.242   | 388.461  | -                |
| DG <sub>PP</sub> | Os015952_01 | S4 | -2.234 | 499.703  | 2350.812 | LOC_Os10g37280.1 |
| DG <sub>PP</sub> | Os046207_01 | S4 | -1.953 | 342.199  | 1324.574 | LOC_Os02g12540.1 |
| DG <sub>PP</sub> | Os052934_01 | S4 | -4.881 | 85.635   | 2522.919 | LOC_Os06g16640.1 |
| DG <sub>PP</sub> | Os012919_01 | S4 | -1.753 | 772.632  | 2603.707 | LOC_Os01g11054.1 |
| DG <sub>PP</sub> | Os015155_01 | S4 | -2.106 | 117.491  | 505.651  | LOC_Os01g71590.3 |
| DG <sub>PP</sub> | Os016404_01 | S4 | -2.310 | 1246.669 | 6181.756 | LOC_Os01g15610.1 |
| DG <sub>PP</sub> | Os017305_01 | S4 | -2.239 | 619.981  | 2927.048 | -                |
| DG <sub>PP</sub> | Os046004_01 | S4 | -1.800 | 922.941  | 3213.340 | LOC_Os02g24410.1 |
| DG <sub>PP</sub> | Os047880_01 | S4 | -2.145 | 277.669  | 1227.911 | -                |
| DG <sub>PP</sub> | Os049044_01 | S4 | -1.839 | 282.126  | 1009.590 | -                |
| DG <sub>PP</sub> | Os016063_01 | S4 | -3.235 | 170.182  | 1602.421 | LOC_Os01g66290.2 |
| DG <sub>PP</sub> | Os022090_01 | S4 | -1.800 | 79.130   | 275.554  | LOC_Os04g47250.1 |
| DG <sub>PP</sub> | Os049649_01 | S4 | -2.079 | 220.448  | 931.317  | -                |
| DG <sub>PP</sub> | Os020318_01 | S4 | -1.800 | 183.327  | 638.566  | LOC_Os07g14160.3 |
| DG <sub>PP</sub> | Os013556_01 | S4 | -1.964 | 62.731   | 244.819  | LOC_Os02g35560.1 |
| DG <sub>PP</sub> | Os046413_01 | S4 | -2.080 | 239.450  | 1012.207 | LOC_Os02g11990.1 |
| DG <sub>PP</sub> | Os049013_01 | S4 | -1.784 | 112.071  | 385.869  | LOC_Os02g29170.1 |
| DG <sub>PP</sub> | Os016132_01 | S4 | -3.863 | 184.648  | 2686.555 | LOC_Os04g14190.1 |
| DG <sub>PP</sub> | Os045207_01 | S4 | -2.357 | 990.916  | 5077.840 | -                |
| DG <sub>PP</sub> | Os044797_01 | S4 | -1.782 | 83.710   | 287.910  | LOC_Os09g19180.1 |
| DG <sub>PP</sub> | Os051869_01 | S4 | -2.877 | 173.269  | 1272.576 | LOC_Os11g45090.1 |

|                  |             |    |        |          |           |                  |
|------------------|-------------|----|--------|----------|-----------|------------------|
| DG <sub>PP</sub> | Os042013_01 | S4 | -3.319 | 4661.550 | 46528.396 | LOC_Os08g19330.1 |
| DG <sub>PP</sub> | Os014025_01 | S4 | -2.255 | 123.616  | 590.247   | -                |
| DG <sub>PP</sub> | Os045664_01 | S4 | -2.050 | 1376.601 | 5699.891  | LOC_Os02g25890.1 |
| DG <sub>PP</sub> | Os014364_01 | S4 | -4.461 | 347.372  | 7650.920  | LOC_Os01g45914.1 |
| DG <sub>PP</sub> | Os012989_01 | S4 | -2.465 | 85.254   | 470.715   | -                |
| DG <sub>PP</sub> | Os052911_01 | S4 | -2.384 | 98.336   | 513.198   | LOC_Os08g04500.1 |
| DG <sub>PP</sub> | Os045117_01 | S4 | -2.022 | 561.879  | 2282.026  | LOC_Os06g06310.1 |
| DG <sub>PP</sub> | Os046281_01 | S4 | -1.813 | 1050.270 | 3690.171  | LOC_Os10g38640.1 |
| DG <sub>PP</sub> | Os020517_01 | S4 | -2.679 | 185.004  | 1184.924  | LOC_Os04g58140.1 |
| DG <sub>PP</sub> | Os041269_01 | S4 | -2.837 | 112.040  | 800.391   | LOC_Os10g01500.1 |
| DG <sub>PP</sub> | Os042819_01 | S4 | -1.881 | 86.386   | 318.182   | LOC_Os05g30000.1 |
| DG <sub>PP</sub> | Os045972_01 | S4 | -2.289 | 109.415  | 534.558   | LOC_Os05g15220.1 |
| DG <sub>PP</sub> | Os052006_01 | S4 | -1.763 | 424.250  | 1439.448  | LOC_Os08g02340.2 |
| DG <sub>PP</sub> | Os023589_01 | S4 | -2.062 | 341.107  | 1423.924  | LOC_Os05g05650.1 |
| DG <sub>PP</sub> | Os043716_01 | S4 | -1.835 | 320.919  | 1144.931  | LOC_Os06g36530.1 |
| DG <sub>PP</sub> | Os011262_01 | S4 | -2.465 | 117.544  | 648.939   | LOC_Os02g52150.2 |
| DG <sub>PP</sub> | Os046251_01 | S4 | -2.291 | 713.915  | 3493.808  | LOC_Os11g16850.1 |
| DG <sub>PP</sub> | Os018033_01 | S4 | -1.861 | 288.738  | 1048.993  | LOC_Os01g68370.4 |
| DG <sub>PP</sub> | Os023251_01 | S4 | -2.497 | 130.423  | 736.444   | -                |
| DG <sub>PP</sub> | Os042540_01 | S4 | -1.841 | 625.941  | 2241.813  | LOC_Os01g67700.1 |
| DG <sub>PP</sub> | Os048394_01 | S4 | -1.747 | 106.874  | 358.814   | LOC_Os01g39100.1 |
| DG <sub>PP</sub> | Os019712_01 | S4 | -2.473 | 327.278  | 1817.385  | LOC_Os02g11060.1 |
| DG <sub>PP</sub> | Os020500_01 | S4 | -1.780 | 103.813  | 356.575   | LOC_Os06g20370.1 |
| DG <sub>PP</sub> | Os021634_01 | S4 | -1.889 | 95.223   | 352.696   | LOC_Os01g59180.1 |
| DG <sub>PP</sub> | Os046857_01 | S4 | -2.371 | 880.448  | 4553.619  | LOC_Os02g38330.1 |
| DG <sub>PP</sub> | Os024100_01 | S4 | -2.245 | 251.651  | 1193.111  | LOC_Os05g03750.1 |
| DG <sub>PP</sub> | Os053207_01 | S4 | -1.792 | 399.584  | 1383.727  | LOC_Os01g01160.1 |
| DG <sub>PP</sub> | Os056132_01 | S4 | -2.126 | 111.611  | 487.047   | LOC_Os05g43040.1 |
| DG <sub>PP</sub> | Os041845_01 | S4 | -2.167 | 102.517  | 460.383   | LOC_Os02g29540.1 |
| DG <sub>PP</sub> | Os052195_01 | S4 | -1.948 | 147.314  | 568.272   | LOC_Os08g39840.1 |
| DG <sub>PP</sub> | Os053356_01 | S4 | -1.768 | 261.639  | 890.958   | LOC_Os01g12760.1 |

|                  |             |    |        |           |           |                  |
|------------------|-------------|----|--------|-----------|-----------|------------------|
| DG <sub>PP</sub> | Os012159_01 | S4 | -2.352 | 206.206   | 1052.518  | LOC_Os12g01140.1 |
| DG <sub>PP</sub> | Os017704_01 | S4 | -1.897 | 984.293   | 3666.727  | LOC_Os02g07200.3 |
| DG <sub>PP</sub> | Os021870_01 | S4 | -2.288 | 312.520   | 1526.750  | LOC_Os07g41060.1 |
| DG <sub>PP</sub> | Os054344_01 | S4 | -1.810 | 105.435   | 369.656   | LOC_Os12g27830.1 |
| DG <sub>PP</sub> | Os015303_01 | S4 | -1.810 | 427.354   | 1498.993  | LOC_Os04g37690.1 |
| DG <sub>PP</sub> | Os053372_01 | S4 | -2.798 | 87.639    | 609.355   | LOC_Os01g03500.1 |
| DG <sub>PP</sub> | Os042462_01 | S4 | -2.042 | 13700.948 | 56434.042 | LOC_Os05g33320.1 |
| DG <sub>PP</sub> | Os012670_01 | S4 | -1.828 | 176.773   | 627.695   | LOC_Os04g33310.1 |
| DG <sub>PP</sub> | Os052028_01 | S4 | -2.052 | 4535.567  | 18810.906 | LOC_Os12g23200.1 |
| DG <sub>PP</sub> | Os053847_01 | S4 | -1.811 | 261.002   | 915.747   | LOC_Os01g12740.1 |
| DG <sub>PP</sub> | Os055703_01 | S4 | -2.057 | 345.918   | 1439.663  | LOC_Os01g31680.1 |
| DG <sub>PP</sub> | Os043715_01 | S4 | -2.382 | 101.660   | 529.770   | LOC_Os10g39070.1 |
| DG <sub>PP</sub> | Os012363_01 | S4 | -2.155 | 1354.826  | 6034.257  | LOC_Os07g36190.1 |
| DG <sub>PP</sub> | Os013888_01 | S4 | -1.768 | 257.924   | 878.284   | LOC_Os11g07980.1 |
| DG <sub>PP</sub> | Os014219_01 | S4 | -1.875 | 214.558   | 787.016   | LOC_Os07g37560.2 |
| DG <sub>PP</sub> | Os014243_01 | S4 | -1.962 | 187.371   | 729.973   | LOC_Os02g21880.1 |
| DG <sub>PP</sub> | Os046600_01 | S4 | -1.818 | 275.209   | 970.495   | -                |
| DG <sub>PP</sub> | Os020576_01 | S4 | -2.521 | 202.768   | 1163.569  | LOC_Os03g56270.2 |
| DG <sub>PP</sub> | Os050828_01 | S4 | -1.868 | 402.846   | 1470.206  | LOC_Os12g07420.1 |
| DG <sub>PP</sub> | Os051948_01 | S4 | -1.993 | 1999.688  | 7957.646  | LOC_Os11g06720.1 |
| DG <sub>PP</sub> | Os054491_01 | S4 | -2.494 | 311.942   | 1757.764  | -                |
| DG <sub>PP</sub> | Os011134_01 | S4 | -2.114 | 200.299   | 866.956   | LOC_Os01g37000.1 |
| DG <sub>PP</sub> | Os013775_01 | S4 | -2.459 | 168.634   | 926.899   | LOC_Os01g48930.1 |
| DG <sub>PP</sub> | Os045359_01 | S4 | -2.546 | 406.518   | 2373.585  | LOC_Os06g09250.1 |
| DG <sub>PP</sub> | Os018960_01 | S4 | -1.931 | 9232.303  | 35196.394 | LOC_Os03g52840.1 |
| DG <sub>PP</sub> | Os044617_01 | S4 | -3.311 | 1169.763  | 11612.922 | -                |
| DG <sub>PP</sub> | Os012547_01 | S4 | -1.795 | 1809.676  | 6280.615  | LOC_Os02g10350.1 |
| DG <sub>PP</sub> | Os052161_01 | S4 | -1.947 | 134.796   | 519.689   | LOC_Os02g02960.4 |
| DG <sub>PP</sub> | Os013976_01 | S4 | -1.808 | 1738.882  | 6089.716  | LOC_Os10g35370.2 |
| DG <sub>PP</sub> | Os045009_01 | S4 | -1.865 | 344.051   | 1252.963  | -                |
| DG <sub>PP</sub> | Os020108_01 | S4 | -1.882 | 884.355   | 3259.514  | LOC_Os01g04010.1 |

|                  |             |    |        |           |          |                  |
|------------------|-------------|----|--------|-----------|----------|------------------|
| DG <sub>PP</sub> | Os021591_01 | S4 | -1.829 | 1435.984  | 5103.303 | LOC_Os11g20330.1 |
| DG <sub>PP</sub> | Os044255_01 | S4 | -1.854 | 1188.281  | 4295.967 | LOC_Os11g13390.1 |
| DG <sub>PP</sub> | Os011454_01 | S4 | -2.036 | 576.579   | 2363.954 | LOC_Os01g43080.1 |
| DG <sub>PP</sub> | Os012559_01 | S4 | -2.072 | 93.061    | 391.167  | LOC_Os05g48770.1 |
| DG <sub>PP</sub> | Os023732_01 | S4 | -2.357 | 125.931   | 645.166  | LOC_Os06g11090.1 |
| DG <sub>PP</sub> | Os025187_01 | S4 | -1.826 | 252.009   | 893.655  | -                |
| DG <sub>PP</sub> | Os013262_01 | S4 | -2.080 | 1856.098  | 7849.707 | LOC_Os06g49500.3 |
| DG <sub>PP</sub> | Os038619_01 | S5 | 1.559  | 610.659   | 207.199  | -                |
| DG <sub>PP</sub> | Os008602_01 | S5 | 1.504  | 1178.847  | 415.633  | LOC_Os05g06920.1 |
| DG <sub>PP</sub> | Os008979_01 | S5 | 1.671  | 11563.834 | 3631.508 | LOC_Os01g17170.1 |
| DG <sub>PP</sub> | Os039902_01 | S5 | 1.629  | 720.363   | 232.930  | LOC_Os08g11680.1 |
| DG <sub>PP</sub> | Os029713_01 | S5 | 2.700  | 3959.518  | 609.413  | LOC_Os07g30990.1 |
| DG <sub>PP</sub> | Os008851_01 | S5 | 1.553  | 2079.491  | 708.646  | LOC_Os01g11710.1 |
| DG <sub>PP</sub> | Os010523_01 | S5 | 1.881  | 2867.996  | 778.882  | -                |
| DG <sub>PP</sub> | Os031885_01 | S5 | 1.579  | 1051.345  | 351.886  | LOC_Os09g26760.1 |
| DG <sub>PP</sub> | Os033536_01 | S5 | 1.768  | 1115.326  | 327.540  | LOC_Os02g13050.1 |
| DG <sub>PP</sub> | Os039580_01 | S5 | 2.988  | 963.911   | 121.479  | LOC_Os02g40180.1 |
| DG <sub>PP</sub> | Os026888_01 | S5 | 1.550  | 2600.821  | 888.184  | LOC_Os08g38230.1 |
| DG <sub>PP</sub> | Os028785_01 | S5 | 1.903  | 31823.651 | 8508.819 | LOC_Os02g38450.1 |
| DG <sub>PP</sub> | Os037264_01 | S5 | 1.617  | 1205.909  | 393.107  | LOC_Os01g11620.1 |
| DG <sub>PP</sub> | Os028951_01 | S5 | 1.693  | 22527.293 | 6968.541 | LOC_Os02g06440.1 |
| DG <sub>PP</sub> | Os056918_02 | S5 | 2.660  | 4233.063  | 669.686  | LOC_Os01g13690.1 |
| DG <sub>PP</sub> | Os040944_01 | S5 | 1.573  | 23655.226 | 7949.660 | LOC_Os07g13920.1 |
| DG <sub>PP</sub> | Os009436_01 | S5 | 1.600  | 25584.747 | 8442.100 | LOC_Os01g38490.1 |
| DG <sub>PP</sub> | Os039940_01 | S5 | 1.672  | 27092.945 | 8502.152 | -                |
| DG <sub>PP</sub> | Os002369_01 | S5 | 1.686  | 1057.307  | 328.502  | -                |
| DG <sub>PP</sub> | Os003977_01 | S5 | 1.807  | 9802.386  | 2800.923 | -                |
| DG <sub>PP</sub> | Os035023_01 | S5 | 1.943  | 2002.856  | 520.873  | -                |
| DG <sub>PP</sub> | Os009892_01 | S5 | 1.553  | 436.162   | 148.677  | LOC_Os07g42640.2 |
| DG <sub>PP</sub> | Os028605_01 | S5 | 1.805  | 1912.992  | 547.593  | LOC_Os02g06380.1 |
| DG <sub>PP</sub> | Os010424_01 | S5 | 1.658  | 28865.273 | 9149.387 | LOC_Os03g15080.2 |



|                  |             |    |       |           |          |                  |
|------------------|-------------|----|-------|-----------|----------|------------------|
| DG <sub>PP</sub> | Os002486_01 | S5 | 1.807 | 507.135   | 144.904  | LOC_Os02g12480.1 |
| DG <sub>PP</sub> | Os031893_01 | S5 | 1.629 | 1281.898  | 414.347  | LOC_Os02g11130.1 |
| DG <sub>PP</sub> | Os010477_01 | S5 | 2.502 | 2039.709  | 360.172  | -                |
| DG <sub>PP</sub> | Os029607_01 | S5 | 1.539 | 566.039   | 194.821  | LOC_Os01g61700.1 |
| DG <sub>PP</sub> | Os008169_01 | S5 | 2.014 | 3841.886  | 951.132  | LOC_Os02g40240.2 |
| DG <sub>PP</sub> | Os040491_01 | S5 | 1.886 | 3555.309  | 962.152  | LOC_Os01g52910.1 |
| DG <sub>PP</sub> | Os010642_01 | S5 | 1.530 | 2296.653  | 795.016  | LOC_Os02g32570.1 |
| DG <sub>PP</sub> | Os026348_01 | S5 | 1.928 | 22007.749 | 5784.587 | LOC_Os04g51890.1 |
| DG <sub>PP</sub> | Os008450_01 | S5 | 1.857 | 869.995   | 240.123  | LOC_Os01g67980.1 |
| DG <sub>PP</sub> | Os055308_01 | S5 | 1.674 | 492.113   | 154.174  | LOC_Os07g48020.1 |
| DG <sub>PP</sub> | Os012734_01 | S5 | 1.646 | 1312.138  | 419.365  | LOC_Os07g09400.1 |
| DG <sub>PP</sub> | Os045364_01 | S5 | 1.509 | 616.086   | 216.421  | LOC_Os09g01860.1 |
| DG <sub>PP</sub> | Os024590_01 | S5 | 1.618 | 563.179   | 183.533  | LOC_Os12g40470.1 |
| DG <sub>PP</sub> | Os021841_01 | S5 | 2.306 | 2577.757  | 521.262  | LOC_Os08g36410.1 |
| DG <sub>PP</sub> | Os046160_01 | S5 | 1.926 | 1117.104  | 293.964  | LOC_Os07g32440.1 |
| DG <sub>PP</sub> | Os019353_01 | S5 | 1.859 | 5556.519  | 1531.858 | LOC_Os08g36440.1 |
| DG <sub>PP</sub> | Os052644_01 | S5 | 1.916 | 969.770   | 256.904  | LOC_Os01g37590.1 |
| DG <sub>PP</sub> | Os011116_01 | S5 | 1.742 | 417.736   | 124.889  | -                |
| DG <sub>PP</sub> | Os011816_01 | S5 | 1.938 | 1091.569  | 284.809  | -                |
| DG <sub>PP</sub> | Os019258_01 | S5 | 2.986 | 1424.743  | 179.785  | LOC_Os03g46190.2 |
| DG <sub>PP</sub> | Os023737_01 | S5 | 2.492 | 1569.171  | 278.951  | -                |
| DG <sub>PP</sub> | Os016076_01 | S5 | 2.439 | 3598.953  | 663.617  | LOC_Os03g01260.1 |
| DG <sub>PP</sub> | Os049306_01 | S5 | 1.769 | 697.828   | 204.811  | LOC_Os10g40450.1 |
| DG <sub>PP</sub> | Os015378_01 | S5 | 1.581 | 449.111   | 150.121  | LOC_Os12g39970.4 |
| DG <sub>PP</sub> | Os015725_01 | S5 | 1.800 | 707.328   | 203.170  | LOC_Os01g53820.1 |
| DG <sub>PP</sub> | Os016152_01 | S5 | 1.544 | 2627.430  | 900.867  | -                |
| DG <sub>PP</sub> | Os017277_01 | S5 | 2.845 | 2303.234  | 320.541  | LOC_Os01g66510.1 |
| DG <sub>PP</sub> | Os045577_01 | S5 | 1.531 | 4853.211  | 1679.046 | LOC_Os12g07990.1 |
| DG <sub>PP</sub> | Os050873_01 | S5 | 1.930 | 3089.722  | 810.754  | -                |
| DG <sub>PP</sub> | Os024011_01 | S5 | 1.854 | 485.683   | 134.351  | LOC_Os03g19260.1 |
| DG <sub>PP</sub> | Os024723_01 | S5 | 1.990 | 845.361   | 212.849  | LOC_Os11g05490.1 |

|                  |                |       |           |          |                  |
|------------------|----------------|-------|-----------|----------|------------------|
| DG <sub>PP</sub> | Os051568_01 S5 | 1.607 | 429.918   | 141.176  | -                |
| DG <sub>PP</sub> | Os018970_01 S5 | 1.580 | 699.562   | 234.050  | LOC_Os04g54564.1 |
| DG <sub>PP</sub> | Os019697_01 S5 | 2.049 | 464.688   | 112.278  | -                |
| DG <sub>PP</sub> | Os051817_01 S5 | 1.712 | 572.739   | 174.839  | LOC_Os03g30660.1 |
| DG <sub>PP</sub> | Os041201_01 S5 | 2.473 | 1701.576  | 306.409  | LOC_Os03g53030.1 |
| DG <sub>PP</sub> | Os021489_01 S5 | 1.891 | 1100.187  | 296.598  | LOC_Os09g36990.1 |
| DG <sub>PP</sub> | Os044170_01 S5 | 2.366 | 1357.091  | 263.324  | LOC_Os01g40200.1 |
| DG <sub>PP</sub> | Os046207_01 S5 | 3.619 | 2122.687  | 172.784  | LOC_Os02g12540.1 |
| DG <sub>PP</sub> | Os049169_01 S5 | 1.513 | 832.869   | 291.869  | LOC_Os08g12510.1 |
| DG <sub>PP</sub> | Os051859_01 S5 | 1.758 | 361.727   | 106.954  | -                |
| DG <sub>PP</sub> | Os023050_01 S5 | 1.579 | 538.223   | 180.156  | LOC_Os06g02330.1 |
| DG <sub>PP</sub> | Os042383_01 S5 | 1.669 | 579.128   | 182.118  | -                |
| DG <sub>PP</sub> | Os016057_01 S5 | 1.600 | 1287.604  | 424.794  | LOC_Os08g43500.1 |
| DG <sub>PP</sub> | Os016404_01 S5 | 1.792 | 3552.619  | 1025.954 | LOC_Os01g15610.1 |
| DG <sub>PP</sub> | Os013447_01 S5 | 2.725 | 1848.274  | 279.587  | LOC_Os02g34600.1 |
| DG <sub>PP</sub> | Os017305_01 S5 | 3.471 | 2814.602  | 253.864  | -                |
| DG <sub>PP</sub> | Os054224_01 S5 | 1.658 | 1026.834  | 325.417  | -                |
| DG <sub>PP</sub> | Os046633_01 S5 | 2.188 | 1701.015  | 373.220  | -                |
| DG <sub>PP</sub> | Os023923_01 S5 | 2.121 | 1209.545  | 278.107  | LOC_Os07g18780.1 |
| DG <sub>PP</sub> | Os053751_01 S5 | 1.593 | 951.731   | 315.458  | LOC_Os07g39810.1 |
| DG <sub>PP</sub> | Os041337_01 S5 | 2.201 | 779.691   | 169.551  | LOC_Os04g05490.1 |
| DG <sub>PP</sub> | Os041663_01 S5 | 2.602 | 3752.584  | 618.270  | LOC_Os01g70080.1 |
| DG <sub>PP</sub> | Os012333_01 S5 | 1.547 | 1498.088  | 512.795  | LOC_Os02g49992.1 |
| DG <sub>PP</sub> | Os044116_01 S5 | 1.527 | 1449.076  | 502.749  | LOC_Os04g01260.1 |
| DG <sub>PP</sub> | Os015957_01 S5 | 1.767 | 726.055   | 213.292  | LOC_Os05g51780.1 |
| DG <sub>PP</sub> | Os018940_01 S5 | 2.019 | 1193.468  | 294.550  | LOC_Os06g49700.2 |
| DG <sub>PP</sub> | Os022377_01 S5 | 1.920 | 3452.891  | 912.400  | LOC_Os05g45750.1 |
| DG <sub>PP</sub> | Os013253_01 S5 | 1.714 | 2282.207  | 695.807  | LOC_Os03g63910.1 |
| DG <sub>PP</sub> | Os047672_01 S5 | 1.567 | 685.844   | 231.459  | LOC_Os05g09720.1 |
| DG <sub>PP</sub> | Os025338_01 S5 | 1.737 | 406.276   | 121.878  | -                |
| DG <sub>PP</sub> | Os044300_01 S5 | 2.295 | 17689.327 | 3603.851 | LOC_Os05g11320.1 |

|                  |             |    |       |          |         |                  |
|------------------|-------------|----|-------|----------|---------|------------------|
| DG <sub>PP</sub> | Os044537_01 | S5 | 1.978 | 853.252  | 216.577 | LOC_Os11g34170.1 |
| DG <sub>PP</sub> | Os020969_01 | S5 | 2.060 | 1611.947 | 386.560 | LOC_Os08g08800.1 |
| DG <sub>PP</sub> | Os016527_01 | S5 | 1.613 | 405.911  | 132.741 | LOC_Os03g60220.1 |
| DG <sub>PP</sub> | Os024669_01 | S5 | 4.056 | 3280.055 | 197.163 | LOC_Os07g03170.1 |
| DG <sub>PP</sub> | Os053816_01 | S5 | 1.594 | 597.469  | 197.907 | LOC_Os08g34720.1 |
| DG <sub>PP</sub> | Os045207_01 | S5 | 2.251 | 1698.676 | 356.975 | -                |
| DG <sub>PP</sub> | Os048651_01 | S5 | 2.694 | 788.649  | 121.910 | LOC_Os10g28724.1 |
| DG <sub>PP</sub> | Os049435_01 | S5 | 2.883 | 1408.459 | 190.897 | -                |
| DG <sub>PP</sub> | Os025903_01 | S5 | 1.599 | 527.527  | 174.110 | LOC_Os03g03790.1 |
| DG <sub>PP</sub> | Os055352_01 | S5 | 1.826 | 1791.366 | 505.096 | -                |
| DG <sub>PP</sub> | Os011667_01 | S5 | 2.252 | 1834.736 | 385.072 | LOC_Os01g60430.1 |
| DG <sub>PP</sub> | Os011450_01 | S5 | 1.547 | 970.847  | 332.256 | LOC_Os01g72160.1 |
| DG <sub>PP</sub> | Os011849_01 | S5 | 2.070 | 505.227  | 120.363 | LOC_Os09g36230.1 |
| DG <sub>PP</sub> | Os022288_01 | S5 | 1.673 | 1048.834 | 329.018 | -                |
| DG <sub>PP</sub> | Os050200_01 | S5 | 1.630 | 1207.389 | 390.170 | LOC_Os07g34640.2 |
| DG <sub>PP</sub> | Os044144_01 | S5 | 2.183 | 962.063  | 211.802 | LOC_Os07g12700.1 |
| DG <sub>PP</sub> | Os045777_01 | S5 | 1.585 | 1513.739 | 504.696 | LOC_Os01g61470.1 |
| DG <sub>PP</sub> | Os049215_01 | S5 | 2.071 | 1636.884 | 389.474 | LOC_Os08g31550.1 |
| DG <sub>PP</sub> | Os050385_01 | S5 | 1.505 | 663.301  | 233.680 | -                |
| DG <sub>PP</sub> | Os024221_01 | S5 | 2.421 | 1414.447 | 264.029 | -                |
| DG <sub>PP</sub> | Os041241_01 | S5 | 3.211 | 2841.481 | 306.785 | LOC_Os01g21270.1 |
| DG <sub>PP</sub> | Os044685_01 | S5 | 2.615 | 1152.282 | 188.145 | LOC_Os11g20600.1 |
| DG <sub>PP</sub> | Os015899_01 | S5 | 2.543 | 2082.621 | 357.229 | LOC_Os12g42610.1 |
| DG <sub>PP</sub> | Os012089_01 | S5 | 1.524 | 687.116  | 238.918 | LOC_Os07g09420.1 |
| DG <sub>PP</sub> | Os045117_01 | S5 | 2.516 | 3221.344 | 563.177 | LOC_Os06g06310.1 |
| DG <sub>PP</sub> | Os046281_01 | S5 | 1.876 | 2233.204 | 608.225 | LOC_Os10g38640.1 |
| DG <sub>PP</sub> | Os023497_01 | S5 | 2.045 | 721.248  | 174.756 | -                |
| DG <sub>PP</sub> | Os054480_01 | S5 | 2.108 | 789.203  | 183.008 | LOC_Os03g07290.1 |
| DG <sub>PP</sub> | Os048614_01 | S5 | 1.505 | 595.825  | 209.955 | -                |
| DG <sub>PP</sub> | Os018804_01 | S5 | 2.295 | 722.143  | 147.164 | LOC_Os04g40520.1 |
| DG <sub>PP</sub> | Os021815_01 | S5 | 1.805 | 1207.683 | 345.521 | LOC_Os06g48200.1 |

|                  |             |    |        |          |          |                  |
|------------------|-------------|----|--------|----------|----------|------------------|
| DG <sub>PP</sub> | Os051250_01 | S5 | 1.832  | 3436.056 | 965.262  | -                |
| DG <sub>PP</sub> | Os053101_01 | S5 | 2.497  | 843.537  | 149.442  | LOC_Os03g62210.1 |
| DG <sub>PP</sub> | Os016013_01 | S5 | 1.527  | 735.587  | 255.327  | LOC_Os06g09540.1 |
| DG <sub>PP</sub> | Os046251_01 | S5 | 1.726  | 2262.939 | 683.834  | LOC_Os11g16850.1 |
| DG <sub>PP</sub> | Os019026_01 | S5 | 2.915  | 1093.322 | 144.999  | -                |
| DG <sub>PP</sub> | Os022480_01 | S5 | 2.234  | 515.808  | 109.643  | LOC_Os01g18220.1 |
| DG <sub>PP</sub> | Os042879_01 | S5 | 2.395  | 1027.260 | 195.269  | -                |
| DG <sub>PP</sub> | Os015812_01 | S5 | 1.881  | 958.309  | 260.206  | LOC_Os03g32190.1 |
| DG <sub>PP</sub> | Os018416_01 | S5 | 1.526  | 866.576  | 300.914  | LOC_Os04g44700.1 |
| DG <sub>PP</sub> | Os021832_01 | S5 | 1.549  | 1036.095 | 354.042  | LOC_Os06g49100.1 |
| DG <sub>PP</sub> | Os050170_01 | S5 | 1.817  | 570.143  | 161.841  | -                |
| DG <sub>PP</sub> | Os043300_01 | S5 | 1.557  | 444.996  | 151.241  | LOC_Os04g02560.1 |
| DG <sub>PP</sub> | Os013480_01 | S5 | 1.627  | 572.768  | 185.428  | LOC_Os06g41410.1 |
| DG <sub>PP</sub> | Os047260_01 | S5 | 1.825  | 7913.165 | 2232.928 | LOC_Os06g34840.1 |
| DG <sub>PP</sub> | Os043763_01 | S5 | 1.549  | 5775.340 | 1974.329 | LOC_Os05g04250.1 |
| DG <sub>PP</sub> | Os045034_01 | S5 | 2.503  | 999.808  | 176.343  | LOC_Os10g28160.1 |
| DG <sub>PP</sub> | Os052201_01 | S5 | 2.895  | 1619.826 | 217.806  | LOC_Os07g46500.2 |
| DG <sub>PP</sub> | Os024919_01 | S5 | 2.046  | 1718.186 | 416.153  | -                |
| DG <sub>PP</sub> | Os051737_01 | S5 | 2.054  | 2126.526 | 512.064  | LOC_Os06g26050.1 |
| DG <sub>PP</sub> | Os043395_01 | S5 | 1.588  | 1333.704 | 443.746  | LOC_Os04g01930.1 |
| DG <sub>PP</sub> | Os014730_01 | S5 | 1.939  | 873.169  | 227.776  | LOC_Os01g59350.2 |
| DG <sub>PP</sub> | Os018640_01 | S5 | 1.716  | 1748.577 | 532.124  | LOC_Os05g31620.1 |
| DG <sub>PP</sub> | Os042866_01 | S5 | 1.862  | 668.045  | 183.731  | LOC_Os10g05820.1 |
| DG <sub>PP</sub> | Os024743_01 | S5 | 2.231  | 811.396  | 172.835  | LOC_Os01g60420.1 |
| DG <sub>PP</sub> | Os054572_01 | S5 | 1.695  | 829.531  | 256.252  | LOC_Os01g13080.1 |
| DG <sub>PP</sub> | Os054614_01 | S5 | 1.864  | 1276.990 | 350.807  | LOC_Os04g51150.1 |
| DG <sub>PP</sub> | Os014184_01 | S5 | 1.614  | 306.705  | 100.185  | LOC_Os05g44290.2 |
| DG <sub>PP</sub> | Os048073_01 | S5 | 1.871  | 604.791  | 165.338  | -                |
| DG <sub>PP</sub> | Os000918_01 | S5 | -2.938 | 219.222  | 1680.033 | LOC_Os11g44960.1 |
| DG <sub>PP</sub> | Os031423_01 | S5 | -1.631 | 498.586  | 1544.321 | -                |
| DG <sub>PP</sub> | Os032943_01 | S5 | -1.780 | 229.459  | 788.142  | LOC_Os11g24180.1 |

|                  |             |    |        |          |          |                  |
|------------------|-------------|----|--------|----------|----------|------------------|
| DG <sub>PP</sub> | Os033341_01 | S5 | -2.142 | 448.925  | 1982.038 | LOC_Os02g34070.1 |
| DG <sub>PP</sub> | Os007109_01 | S5 | -1.924 | 243.681  | 924.612  | LOC_Os05g25080.1 |
| DG <sub>PP</sub> | Os034125_01 | S5 | -1.982 | 351.456  | 1388.119 | LOC_Os03g08570.1 |
| DG <sub>PP</sub> | Os034439_01 | S5 | -2.759 | 998.565  | 6758.654 | LOC_Os03g32570.1 |
| DG <sub>PP</sub> | Os036001_01 | S5 | -1.943 | 433.824  | 1668.062 | LOC_Os11g19070.1 |
| DG <sub>PP</sub> | Os036737_01 | S5 | -2.262 | 291.454  | 1397.957 | LOC_Os01g18370.1 |
| DG <sub>PP</sub> | Os032700_01 | S5 | -2.521 | 343.706  | 1972.215 | LOC_Os10g09900.1 |
| DG <sub>PP</sub> | Os034986_01 | S5 | -1.954 | 874.792  | 3389.930 | -                |
| DG <sub>PP</sub> | Os009003_01 | S5 | -1.863 | 404.485  | 1470.908 | LOC_Os08g09340.1 |
| DG <sub>PP</sub> | Os009784_01 | S5 | -2.038 | 251.193  | 1031.693 | LOC_Os07g29794.1 |
| DG <sub>PP</sub> | Os028876_01 | S5 | -1.762 | 412.653  | 1399.247 | LOC_Os07g40950.1 |
| DG <sub>PP</sub> | Os031055_01 | S5 | -1.562 | 413.560  | 1220.921 | LOC_Os03g08230.1 |
| DG <sub>PP</sub> | Os031079_01 | S5 | -1.760 | 215.879  | 731.077  | LOC_Os01g41230.1 |
| DG <sub>PP</sub> | Os031097_01 | S5 | -1.714 | 241.149  | 790.988  | LOC_Os03g59620.1 |
| DG <sub>PP</sub> | Os032955_01 | S5 | -1.737 | 181.957  | 606.403  | LOC_Os06g28490.1 |
| DG <sub>PP</sub> | Os034119_01 | S5 | -2.108 | 294.623  | 1270.285 | LOC_Os04g08080.1 |
| DG <sub>PP</sub> | Os034475_01 | S5 | -1.976 | 1008.392 | 3967.039 | LOC_Os08g35310.1 |
| DG <sub>PP</sub> | Os034849_01 | S5 | -1.884 | 621.741  | 2294.948 | LOC_Os09g25010.1 |
| DG <sub>PP</sub> | Os007477_01 | S5 | -1.970 | 221.778  | 869.085  | LOC_Os09g27230.1 |
| DG <sub>PP</sub> | Os007500_01 | S5 | -2.341 | 228.031  | 1155.529 | LOC_Os07g41190.1 |
| DG <sub>PP</sub> | Os000282_01 | S5 | -1.946 | 562.552  | 2168.039 | LOC_Os03g60100.1 |
| DG <sub>PP</sub> | Os002801_01 | S5 | -2.305 | 523.877  | 2588.921 | LOC_Os02g57340.1 |
| DG <sub>PP</sub> | Os030028_01 | S5 | -2.218 | 323.428  | 1504.726 | LOC_Os01g02710.1 |
| DG <sub>PP</sub> | Os031880_01 | S5 | -1.663 | 1507.140 | 4772.890 | LOC_Os01g57020.1 |
| DG <sub>PP</sub> | Os032688_01 | S5 | -2.634 | 180.626  | 1121.058 | LOC_Os07g26500.1 |
| DG <sub>PP</sub> | Os008644_01 | S5 | -2.178 | 354.733  | 1605.732 | LOC_Os02g41520.1 |
| DG <sub>PP</sub> | Os028680_01 | S5 | -2.929 | 198.308  | 1510.062 | LOC_Os07g06100.1 |
| DG <sub>PP</sub> | Os056934_02 | S5 | -1.666 | 440.134  | 1396.917 | -                |
| DG <sub>PP</sub> | Os057275_02 | S5 | -2.168 | 428.356  | 1925.411 | -                |
| DG <sub>PP</sub> | Os010446_01 | S5 | -1.554 | 433.258  | 1272.261 | LOC_Os04g56390.1 |
| DG <sub>PP</sub> | Os008990_01 | S5 | -1.552 | 325.259  | 954.064  | LOC_Os01g32660.1 |

|                  |             |    |        |          |           |                  |
|------------------|-------------|----|--------|----------|-----------|------------------|
| DG <sub>PP</sub> | Os010141_01 | S5 | -1.578 | 318.063  | 949.877   | -                |
| DG <sub>PP</sub> | Os056446_01 | S5 | -2.755 | 155.003  | 1046.030  | LOC_Os01g74160.1 |
| DG <sub>PP</sub> | Os057254_02 | S5 | -2.017 | 9476.819 | 38362.689 | -                |
| DG <sub>PP</sub> | Os000445_01 | S5 | -1.684 | 707.109  | 2272.206  | LOC_Os01g37910.1 |
| DG <sub>PP</sub> | Os009107_01 | S5 | -1.957 | 216.685  | 841.538   | LOC_Os02g50130.1 |
| DG <sub>PP</sub> | Os009913_01 | S5 | -1.683 | 216.824  | 696.169   | LOC_Os11g41990.1 |
| DG <sub>PP</sub> | Os001385_01 | S5 | -1.999 | 1189.300 | 4753.491  | LOC_Os02g05470.1 |
| DG <sub>PP</sub> | Os030032_01 | S5 | -1.668 | 177.921  | 565.226   | LOC_Os06g48560.1 |
| DG <sub>PP</sub> | Os009547_01 | S5 | -1.671 | 330.134  | 1051.139  | LOC_Os01g13570.1 |
| DG <sub>PP</sub> | Os000373_01 | S5 | -1.651 | 919.931  | 2889.907  | LOC_Os03g10700.1 |
| DG <sub>PP</sub> | Os008784_01 | S5 | -1.538 | 251.843  | 731.432   | LOC_Os12g34874.1 |
| DG <sub>PP</sub> | Os009082_01 | S5 | -1.846 | 231.136  | 830.746   | LOC_Os04g42430.2 |
| DG <sub>PP</sub> | Os057286_02 | S5 | -1.543 | 965.292  | 2812.779  | LOC_Os01g43150.1 |
| DG <sub>PP</sub> | Os008994_01 | S5 | -1.623 | 217.484  | 669.677   | LOC_Os04g32580.1 |
| DG <sub>PP</sub> | Os009787_01 | S5 | -2.600 | 448.838  | 2721.891  | LOC_Os07g23120.1 |
| DG <sub>PP</sub> | Os057238_02 | S5 | -1.569 | 261.907  | 777.270   | LOC_Os01g65350.1 |
| DG <sub>PP</sub> | Os008199_01 | S5 | -2.379 | 558.484  | 2904.364  | LOC_Os11g44990.1 |
| DG <sub>PP</sub> | Os031550_01 | S5 | -1.812 | 268.232  | 942.119   | LOC_Os04g10924.1 |
| DG <sub>PP</sub> | Os009085_01 | S5 | -1.600 | 193.366  | 586.058   | LOC_Os10g23220.2 |
| DG <sub>PP</sub> | Os051935_01 | S5 | -1.784 | 615.053  | 2118.627  | LOC_Os01g15270.1 |
| DG <sub>PP</sub> | Os023161_01 | S5 | -1.665 | 204.406  | 647.994   | LOC_Os11g05820.1 |
| DG <sub>PP</sub> | Os011969_01 | S5 | -1.702 | 170.270  | 554.121   | LOC_Os05g25400.1 |
| DG <sub>PP</sub> | Os012340_01 | S5 | -1.640 | 213.526  | 665.311   | LOC_Os11g28184.3 |
| DG <sub>PP</sub> | Os017113_01 | S5 | -1.706 | 360.280  | 1175.449  | LOC_Os03g63770.6 |
| DG <sub>PP</sub> | Os024190_01 | S5 | -1.786 | 366.402  | 1263.307  | LOC_Os01g20160.1 |
| DG <sub>PP</sub> | Os054828_01 | S5 | -4.322 | 99.618   | 1992.921  | LOC_Os01g66940.1 |
| DG <sub>PP</sub> | Os013356_01 | S5 | -3.348 | 186.933  | 1903.027  | LOC_Os07g40974.1 |
| DG <sub>PP</sub> | Os017708_01 | S5 | -1.737 | 144.993  | 483.339   | -                |
| DG <sub>PP</sub> | Os018515_01 | S5 | -1.575 | 534.648  | 1593.123  | LOC_Os02g43500.2 |
| DG <sub>PP</sub> | Os050398_01 | S5 | -1.646 | 194.175  | 607.832   | LOC_Os11g12060.1 |
| DG <sub>PP</sub> | Os011915_01 | S5 | -1.550 | 921.947  | 2699.366  | LOC_Os05g49800.1 |

|                  |             |    |        |          |          |                  |
|------------------|-------------|----|--------|----------|----------|------------------|
| DG <sub>PP</sub> | Os019511_01 | S5 | -1.922 | 200.379  | 759.567  | LOC_Os06g47350.2 |
| DG <sub>PP</sub> | Os051946_01 | S5 | -1.638 | 1789.948 | 5570.071 | LOC_Os08g39300.1 |
| DG <sub>PP</sub> | Os022442_01 | S5 | -1.825 | 253.921  | 899.783  | -                |
| DG <sub>PP</sub> | Os014538_01 | S5 | -2.188 | 1496.592 | 6820.393 | LOC_Os06g51220.4 |
| DG <sub>PP</sub> | Os045565_01 | S5 | -3.750 | 141.545  | 1903.885 | LOC_Os10g09630.1 |
| DG <sub>PP</sub> | Os020633_01 | S5 | -1.680 | 195.295  | 625.745  | LOC_Os09g30120.1 |
| DG <sub>PP</sub> | Os011651_01 | S5 | -1.562 | 195.246  | 576.612  | LOC_Os09g13570.1 |
| DG <sub>PP</sub> | Os012781_01 | S5 | -1.598 | 576.889  | 1746.774 | LOC_Os11g25780.1 |
| DG <sub>PP</sub> | Os021978_01 | S5 | -1.751 | 978.995  | 3295.495 | LOC_Os02g39160.1 |
| DG <sub>PP</sub> | Os013325_01 | S5 | -1.667 | 157.597  | 500.545  | LOC_Os08g39860.2 |
| DG <sub>PP</sub> | Os013650_01 | S5 | -2.162 | 180.492  | 807.942  | LOC_Os02g22780.1 |
| DG <sub>PP</sub> | Os016575_01 | S5 | -2.278 | 467.455  | 2267.393 | LOC_Os01g40630.1 |
| DG <sub>PP</sub> | Os047994_01 | S5 | -1.696 | 190.805  | 617.998  | LOC_Os06g44690.1 |
| DG <sub>PP</sub> | Os019597_01 | S5 | -1.682 | 262.492  | 842.297  | LOC_Os11g10520.1 |
| DG <sub>PP</sub> | Os020740_01 | S5 | -1.808 | 225.856  | 791.123  | LOC_Os06g08530.1 |
| DG <sub>PP</sub> | Os018929_01 | S5 | -2.149 | 235.402  | 1044.417 | LOC_Os01g09540.1 |
| DG <sub>PP</sub> | Os054448_01 | S5 | -1.732 | 237.919  | 790.266  | LOC_Os06g48750.2 |
| DG <sub>PP</sub> | Os011412_01 | S5 | -1.793 | 118.408  | 410.355  | LOC_Os11g37050.1 |
| DG <sub>PP</sub> | Os012563_01 | S5 | -1.652 | 836.702  | 2629.447 | LOC_Os12g12850.2 |
| DG <sub>PP</sub> | Os019287_01 | S5 | -2.309 | 269.977  | 1337.977 | LOC_Os01g65080.3 |
| DG <sub>PP</sub> | Os013945_01 | S5 | -1.593 | 311.487  | 939.757  | LOC_Os03g38950.1 |
| DG <sub>PP</sub> | Os016457_01 | S5 | -2.065 | 136.996  | 573.208  | -                |
| DG <sub>PP</sub> | Os018714_01 | S5 | -1.540 | 257.122  | 747.575  | LOC_Os01g53020.1 |
| DG <sub>PP</sub> | Os023615_01 | S5 | -2.626 | 168.403  | 1039.256 | -                |
| DG <sub>PP</sub> | Os024664_01 | S5 | -1.540 | 189.352  | 550.669  | LOC_Os03g16470.3 |
| DG <sub>PP</sub> | Os054488_01 | S5 | -1.745 | 300.940  | 1008.823 | LOC_Os06g13680.1 |
| DG <sub>PP</sub> | Os045434_01 | S5 | -1.808 | 186.307  | 652.264  | LOC_Os05g23210.1 |
| DG <sub>PP</sub> | Os054826_01 | S5 | -1.702 | 227.116  | 739.046  | LOC_Os01g70210.1 |
| DG <sub>PP</sub> | Os012532_01 | S5 | -1.808 | 209.946  | 735.185  | LOC_Os07g49460.4 |
| DG <sub>PP</sub> | Os015095_01 | S5 | -2.528 | 199.667  | 1151.335 | LOC_Os01g73450.1 |
| DG <sub>PP</sub> | Os052118_01 | S5 | -2.339 | 868.005  | 4392.072 | LOC_Os10g18340.1 |

|                  |             |    |        |          |           |                  |
|------------------|-------------|----|--------|----------|-----------|------------------|
| DG <sub>PP</sub> | Os052465_01 | S5 | -1.570 | 193.030  | 573.226   | -                |
| DG <sub>PP</sub> | Os011733_01 | S5 | -1.603 | 1414.719 | 4297.251  | LOC_Os06g51029.1 |
| DG <sub>PP</sub> | Os011814_01 | S5 | -1.601 | 126.913  | 384.968   | -                |
| DG <sub>PP</sub> | Os014192_01 | S5 | -1.678 | 419.376  | 1342.100  | LOC_Os03g20790.1 |
| DG <sub>PP</sub> | Os022195_01 | S5 | -1.644 | 327.250  | 1022.747  | -                |
| DG <sub>PP</sub> | Os054646_01 | S5 | -1.562 | 607.882  | 1794.924  | LOC_Os01g73910.1 |
| DG <sub>PP</sub> | Os014269_01 | S5 | -1.676 | 504.682  | 1612.897  | LOC_Os01g68450.1 |
| DG <sub>PP</sub> | Os054516_01 | S5 | -1.674 | 235.868  | 752.511   | LOC_Os11g14920.1 |
| DG <sub>PP</sub> | Os013428_01 | S5 | -1.640 | 142.250  | 443.275   | LOC_Os03g57240.1 |
| DG <sub>PP</sub> | Os016132_01 | S5 | -2.429 | 210.114  | 1131.380  | LOC_Os04g14190.1 |
| DG <sub>PP</sub> | Os052059_01 | S5 | -2.518 | 392.187  | 2246.849  | LOC_Os09g26420.3 |
| DG <sub>PP</sub> | Os052088_01 | S5 | -1.676 | 160.215  | 512.077   | LOC_Os03g14630.1 |
| DG <sub>PP</sub> | Os054586_01 | S5 | -1.846 | 333.166  | 1197.365  | LOC_Os04g57440.1 |
| DG <sub>PP</sub> | Os011626_01 | S5 | -1.751 | 204.315  | 687.709   | LOC_Os02g15900.1 |
| DG <sub>PP</sub> | Os016309_01 | S5 | -1.653 | 543.461  | 1709.066  | LOC_Os10g28360.1 |
| DG <sub>PP</sub> | Os018541_01 | S5 | -1.728 | 475.239  | 1573.826  | LOC_Os06g43660.1 |
| DG <sub>PP</sub> | Os054458_01 | S5 | -1.610 | 601.530  | 1836.295  | LOC_Os12g05050.1 |
| DG <sub>PP</sub> | Os054779_01 | S5 | -2.074 | 382.996  | 1612.455  | LOC_Os01g13770.1 |
| DG <sub>PP</sub> | Os042013_01 | S5 | -1.831 | 5460.482 | 19425.622 | LOC_Os08g19330.1 |
| DG <sub>PP</sub> | Os044667_01 | S5 | -1.543 | 160.170  | 466.808   | LOC_Os06g15930.1 |
| DG <sub>PP</sub> | Os016615_01 | S5 | -2.752 | 834.222  | 5621.190  | LOC_Os11g05050.2 |
| DG <sub>PP</sub> | Os052093_01 | S5 | -2.356 | 836.660  | 4282.394  | LOC_Os02g38210.1 |
| DG <sub>PP</sub> | Os024798_01 | S5 | -1.541 | 224.784  | 654.257   | LOC_Os05g48800.2 |
| DG <sub>PP</sub> | Os052893_01 | S5 | -1.563 | 189.978  | 561.401   | LOC_Os10g10170.1 |
| DG <sub>PP</sub> | Os014364_01 | S5 | -3.230 | 574.168  | 5386.469  | LOC_Os01g45914.1 |
| DG <sub>PP</sub> | Os014849_01 | S5 | -1.571 | 268.163  | 796.896   | LOC_Os06g04510.1 |
| DG <sub>PP</sub> | Os054392_01 | S5 | -1.806 | 481.258  | 1682.254  | LOC_Os04g40950.1 |
| DG <sub>PP</sub> | Os054446_01 | S5 | -1.715 | 1741.734 | 5717.622  | LOC_Os07g01760.1 |
| DG <sub>PP</sub> | Os055529_01 | S5 | -1.542 | 590.578  | 1719.317  | LOC_Os04g56230.1 |
| DG <sub>PP</sub> | Os011415_01 | S5 | -1.798 | 3288.462 | 11435.545 | LOC_Os12g10604.1 |
| DG <sub>PP</sub> | Os015905_01 | S5 | -1.749 | 567.032  | 1905.705  | LOC_Os08g44290.1 |



|                  |             |    |        |          |          |                  |
|------------------|-------------|----|--------|----------|----------|------------------|
| DG <sub>PP</sub> | Os019607_01 | S5 | -1.832 | 172.358  | 613.592  | LOC_Os03g53670.1 |
| DG <sub>PP</sub> | Os020137_01 | S5 | -1.759 | 318.510  | 1077.991 | LOC_Os06g41670.1 |
| DG <sub>PP</sub> | Os055222_01 | S5 | -2.074 | 147.839  | 622.588  | LOC_Os01g59060.1 |
| DG <sub>PP</sub> | Os012695_01 | S5 | -1.587 | 146.120  | 439.091  | LOC_Os02g43519.1 |
| DG <sub>PP</sub> | Os016921_01 | S5 | -1.580 | 167.872  | 501.765  | LOC_Os07g47290.1 |
| DG <sub>PP</sub> | Os041436_01 | S5 | -2.212 | 241.409  | 1118.636 | LOC_Os11g47950.1 |
| DG <sub>PP</sub> | Os011660_01 | S5 | -1.850 | 1225.279 | 4417.228 | LOC_Os06g45820.1 |
| DG <sub>PP</sub> | Os019825_01 | S5 | -1.764 | 480.148  | 1631.305 | LOC_Os05g34070.1 |
| DG <sub>PP</sub> | Os054121_01 | S5 | -1.724 | 210.903  | 696.864  | LOC_Os09g10700.1 |
| DG <sub>PP</sub> | Os018386_01 | S5 | -1.695 | 234.419  | 758.816  | LOC_Os02g39720.7 |
| DG <sub>PP</sub> | Os016661_01 | S5 | -1.775 | 289.977  | 992.199  | LOC_Os08g25734.1 |
| DG <sub>PP</sub> | Os017115_01 | S5 | -1.779 | 559.488  | 1920.215 | LOC_Os12g42550.1 |
| DG <sub>PP</sub> | Os021180_01 | S5 | -1.593 | 101.370  | 305.752  | LOC_Os01g65410.1 |
| DG <sub>PP</sub> | Os052184_01 | S5 | -1.580 | 827.691  | 2474.039 | LOC_Os06g08080.1 |
| DG <sub>PP</sub> | Os054807_01 | S5 | -1.525 | 318.027  | 915.488  | LOC_Os07g01870.1 |
| DG <sub>PP</sub> | Os018523_01 | S5 | -1.552 | 404.825  | 1187.358 | LOC_Os05g01950.1 |
| DG <sub>PP</sub> | Os022240_01 | S5 | -2.048 | 939.735  | 3884.913 | LOC_Os05g13620.1 |
| DG <sub>PP</sub> | Os052098_01 | S5 | -1.718 | 351.028  | 1155.031 | LOC_Os06g21480.1 |
| DG <sub>PP</sub> | Os052122_01 | S5 | -1.784 | 376.713  | 1297.290 | LOC_Os02g04160.1 |
| DG <sub>PP</sub> | Os024100_01 | S5 | -2.463 | 142.444  | 785.472  | LOC_Os05g03750.1 |
| DG <sub>PP</sub> | Os053987_01 | S5 | -1.755 | 270.981  | 914.872  | LOC_Os01g65190.1 |
| DG <sub>PP</sub> | Os012876_01 | S5 | -1.589 | 663.491  | 1995.497 | LOC_Os05g50550.1 |
| DG <sub>PP</sub> | Os012910_01 | S5 | -2.045 | 340.312  | 1404.248 | LOC_Os12g38170.1 |
| DG <sub>PP</sub> | Os021870_01 | S5 | -2.750 | 128.790  | 866.334  | LOC_Os07g41060.1 |
| DG <sub>PP</sub> | Os024059_01 | S5 | -1.639 | 664.869  | 2070.387 | -                |
| DG <sub>PP</sub> | Os054678_01 | S5 | -2.162 | 106.371  | 476.188  | LOC_Os01g52214.1 |
| DG <sub>PP</sub> | Os054743_01 | S5 | -1.684 | 159.736  | 513.254  | LOC_Os01g64970.1 |
| DG <sub>PP</sub> | Os012841_01 | S5 | -2.224 | 276.958  | 1293.527 | LOC_Os05g16430.1 |
| DG <sub>PP</sub> | Os012870_01 | S5 | -1.619 | 258.332  | 793.571  | LOC_Os03g03670.1 |
| DG <sub>PP</sub> | Os015303_01 | S5 | -2.324 | 256.634  | 1285.407 | LOC_Os04g37690.1 |
| DG <sub>PP</sub> | Os048874_01 | S5 | -1.660 | 337.987  | 1067.787 | LOC_Os05g51930.1 |

|                  |             |    |        |          |           |                  |
|------------------|-------------|----|--------|----------|-----------|------------------|
| DG <sub>PP</sub> | Os052281_01 | S5 | -1.525 | 1012.485 | 2914.754  | LOC_Os07g46460.1 |
| DG <sub>PP</sub> | Os011512_01 | S5 | -1.729 | 261.927  | 868.133   | LOC_Os07g41370.1 |
| DG <sub>PP</sub> | Os018397_01 | S5 | -2.258 | 142.125  | 679.924   | LOC_Os08g04450.4 |
| DG <sub>PP</sub> | Os021391_01 | S5 | -1.548 | 688.988  | 2014.911  | LOC_Os03g12670.2 |
| DG <sub>PP</sub> | Os052028_01 | S5 | -1.887 | 2685.366 | 9928.958  | LOC_Os12g23200.1 |
| DG <sub>PP</sub> | Os054984_01 | S5 | -1.744 | 282.168  | 945.191   | LOC_Os05g51450.1 |
| DG <sub>PP</sub> | Os055703_01 | S5 | -1.570 | 343.760  | 1020.445  | LOC_Os01g31680.1 |
| DG <sub>PP</sub> | Os014285_01 | S5 | -2.249 | 467.758  | 2223.613  | LOC_Os08g14440.2 |
| DG <sub>PP</sub> | Os016789_01 | S5 | -1.621 | 255.965  | 787.249   | LOC_Os01g48300.4 |
| DG <sub>PP</sub> | Os017149_01 | S5 | -1.570 | 1384.372 | 4109.161  | LOC_Os03g01030.1 |
| DG <sub>PP</sub> | Os017944_01 | S5 | -2.148 | 1843.577 | 8168.542  | LOC_Os04g18090.1 |
| DG <sub>PP</sub> | Os019072_01 | S5 | -1.997 | 147.327  | 588.124   | LOC_Os06g09450.7 |
| DG <sub>PP</sub> | Os020576_01 | S5 | -1.611 | 182.201  | 556.597   | LOC_Os03g56270.2 |
| DG <sub>PP</sub> | Os051948_01 | S5 | -2.909 | 898.065  | 6743.778  | LOC_Os11g06720.1 |
| DG <sub>PP</sub> | Os054509_01 | S5 | -1.571 | 2928.737 | 8701.674  | LOC_Os02g47020.1 |
| DG <sub>PP</sub> | Os013426_01 | S5 | -2.338 | 376.294  | 1902.172  | LOC_Os12g35630.1 |
| DG <sub>PP</sub> | Os013456_01 | S5 | -1.662 | 290.381  | 918.796   | LOC_Os05g38640.1 |
| DG <sub>PP</sub> | Os054578_01 | S5 | -2.009 | 315.996  | 1271.839  | LOC_Os02g39630.2 |
| DG <sub>PP</sub> | Os012417_01 | S5 | -1.722 | 250.357  | 825.813   | LOC_Os04g47360.1 |
| DG <sub>PP</sub> | Os012723_01 | S5 | -1.971 | 3340.814 | 13100.093 | LOC_Os03g03910.1 |
| DG <sub>PP</sub> | Os013145_01 | S5 | -1.650 | 339.961  | 1067.217  | LOC_Os02g38820.1 |
| DG <sub>PP</sub> | Os018960_01 | S5 | -2.111 | 2970.030 | 12830.056 | LOC_Os03g52840.1 |
| DG <sub>PP</sub> | Os022309_01 | S5 | -1.745 | 337.711  | 1132.053  | LOC_Os05g10670.1 |
| DG <sub>PP</sub> | Os054450_01 | S5 | -1.891 | 492.335  | 1825.452  | LOC_Os04g57220.3 |
| DG <sub>PP</sub> | Os044617_01 | S5 | -2.836 | 865.918  | 6184.661  | -                |
| DG <sub>PP</sub> | Os012921_01 | S5 | -1.613 | 954.789  | 2920.771  | LOC_Os04g56240.1 |
| DG <sub>PP</sub> | Os018138_01 | S5 | -1.988 | 157.816  | 625.824   | LOC_Os10g36000.2 |
| DG <sub>PP</sub> | Os052121_01 | S5 | -1.589 | 545.593  | 1640.851  | LOC_Os01g48420.1 |
| DG <sub>PP</sub> | Os052870_01 | S5 | -1.564 | 236.481  | 699.111   | LOC_Os01g21820.1 |
| DG <sub>PP</sub> | Os054713_01 | S5 | -1.636 | 294.796  | 916.454   | LOC_Os08g44380.2 |
| DG <sub>PP</sub> | Os012482_01 | S5 | -1.620 | 329.023  | 1011.480  | LOC_Os07g01030.1 |

|                  |             |    |        |           |          |                  |
|------------------|-------------|----|--------|-----------|----------|------------------|
| DG <sub>PP</sub> | Os012829_01 | S5 | -2.753 | 202.432   | 1364.366 | LOC_Os01g18630.1 |
| DG <sub>PP</sub> | Os018221_01 | S5 | -1.594 | 307.140   | 927.178  | -                |
| DG <sub>PP</sub> | Os020108_01 | S5 | -1.605 | 408.923   | 1243.532 | LOC_Os01g04010.1 |
| DG <sub>PP</sub> | Os055205_01 | S5 | -1.588 | 168.646   | 507.094  | LOC_Os09g12660.2 |
| DG <sub>PP</sub> | Os053247_01 | S5 | -1.911 | 152.359   | 572.990  | LOC_Os10g40830.1 |
| DG <sub>PP</sub> | Os054701_01 | S5 | -1.533 | 414.744   | 1200.039 | LOC_Os10g32820.1 |
| DG <sub>PP</sub> | Os012886_01 | S5 | -1.693 | 211.137   | 682.501  | LOC_Os03g06230.1 |
| DG <sub>PP</sub> | Os014320_01 | S5 | -2.119 | 357.867   | 1554.781 | LOC_Os03g17570.3 |
| DG <sub>PP</sub> | Os057301_02 | S6 | -1.470 | 457.420   | 1267.503 | LOC_Os03g04710.1 |
| DG <sub>PP</sub> | Os057284_02 | S6 | -1.091 | 485.329   | 1033.513 | LOC_Os07g02800.3 |
| DG <sub>PP</sub> | Os057264_02 | S6 | 1.520  | 774.837   | 270.256  | LOC_Os05g42350.1 |
| DG <sub>PP</sub> | Os057245_02 | S6 | 1.758  | 896.953   | 265.105  | LOC_Os07g48010.1 |
| DG <sub>PP</sub> | Os057225_02 | S6 | 1.325  | 684.290   | 273.076  | LOC_Os11g29120.2 |
| DG <sub>PP</sub> | Os057161_02 | S6 | 1.359  | 970.455   | 378.251  | LOC_Os03g62170.1 |
| DG <sub>PP</sub> | Os056918_02 | S6 | 3.179  | 2515.655  | 277.822  | LOC_Os01g13690.1 |
| DG <sub>PP</sub> | Os055646_01 | S6 | 1.646  | 492.133   | 157.294  | LOC_Os12g29670.1 |
| DG <sub>PP</sub> | Os055644_01 | S6 | -1.087 | 455.162   | 966.619  | LOC_Os01g61400.1 |
| DG <sub>PP</sub> | Os055629_01 | S6 | -1.688 | 242.213   | 780.237  | LOC_Os02g02340.1 |
| DG <sub>PP</sub> | Os055340_01 | S6 | 1.872  | 824.235   | 225.130  | -                |
| DG <sub>PP</sub> | Os055319_01 | S6 | -1.461 | 173.818   | 478.664  | LOC_Os05g29990.1 |
| DG <sub>PP</sub> | Os055146_01 | S6 | 1.606  | 582.353   | 191.316  | LOC_Os08g39500.1 |
| DG <sub>PP</sub> | Os055024_01 | S6 | 1.399  | 829.270   | 314.357  | LOC_Os04g53310.1 |
| DG <sub>PP</sub> | Os054826_01 | S6 | -1.646 | 238.611   | 746.794  | LOC_Os01g70210.1 |
| DG <sub>PP</sub> | Os054768_01 | S6 | 1.218  | 303.519   | 130.480  | LOC_Os02g05670.1 |
| DG <sub>PP</sub> | Os054752_01 | S6 | 1.143  | 1161.827  | 525.985  | -                |
| DG <sub>PP</sub> | Os054660_01 | S6 | 1.118  | 13845.788 | 6380.113 | LOC_Os04g41560.2 |
| DG <sub>PP</sub> | Os054657_01 | S6 | 4.169  | 2850.569  | 158.435  | LOC_Os02g13870.1 |
| DG <sub>PP</sub> | Os054643_01 | S6 | -1.430 | 224.066   | 603.684  | LOC_Os01g09320.1 |
| DG <sub>PP</sub> | Os054627_01 | S6 | 1.718  | 1865.317  | 566.883  | LOC_Os01g73940.1 |
| DG <sub>PP</sub> | Os054604_01 | S6 | 1.109  | 1466.830  | 679.878  | LOC_Os07g39350.1 |
| DG <sub>PP</sub> | Os054601_01 | S6 | -1.163 | 439.899   | 984.956  | LOC_Os11g26910.1 |

|                  |                |        |          |          |                  |
|------------------|----------------|--------|----------|----------|------------------|
| DG <sub>PP</sub> | Os054595_01 S6 | -1.383 | 271.426  | 707.675  | LOC_Os04g32950.1 |
| DG <sub>PP</sub> | Os054577_01 S6 | -2.016 | 109.871  | 444.386  | LOC_Os04g55920.2 |
| DG <sub>PP</sub> | Os054508_01 S6 | -1.134 | 133.576  | 293.209  | LOC_Os02g06700.2 |
| DG <sub>PP</sub> | Os054483_01 S6 | -1.139 | 828.674  | 1824.922 | LOC_Os03g50290.3 |
| DG <sub>PP</sub> | Os054267_01 S6 | -1.207 | 515.002  | 1188.720 | -                |
| DG <sub>PP</sub> | Os053631_01 S6 | 1.729  | 564.452  | 170.294  | LOC_Os01g14890.1 |
| DG <sub>PP</sub> | Os053356_01 S6 | -1.243 | 259.740  | 614.991  | LOC_Os01g12760.1 |
| DG <sub>PP</sub> | Os052823_01 S6 | 1.981  | 3345.283 | 847.208  | LOC_Os02g09460.1 |
| DG <sub>PP</sub> | Os052686_01 S6 | 1.642  | 909.323  | 291.290  | LOC_Os10g26620.1 |
| DG <sub>PP</sub> | Os052672_01 S6 | -1.805 | 136.308  | 476.465  | LOC_Os01g62810.2 |
| DG <sub>PP</sub> | Os052644_01 S6 | 1.383  | 1273.419 | 488.158  | LOC_Os01g37590.1 |
| DG <sub>PP</sub> | Os052637_01 S6 | 1.095  | 480.852  | 225.115  | -                |
| DG <sub>PP</sub> | Os052420_01 S6 | -1.110 | 384.807  | 830.363  | LOC_Os01g05800.1 |
| DG <sub>PP</sub> | Os052213_01 S6 | 1.099  | 412.262  | 192.434  | LOC_Os01g22900.1 |
| DG <sub>PP</sub> | Os052183_01 S6 | 1.277  | 246.018  | 101.552  | LOC_Os01g66960.1 |
| DG <sub>PP</sub> | Os052148_01 S6 | -1.321 | 163.722  | 409.175  | -                |
| DG <sub>PP</sub> | Os052096_01 S6 | -1.244 | 620.876  | 1471.063 | LOC_Os04g46960.2 |
| DG <sub>PP</sub> | Os052084_01 S6 | 1.391  | 549.872  | 209.736  | LOC_Os11g32650.1 |
| DG <sub>PP</sub> | Os052060_01 S6 | 1.229  | 1156.329 | 493.458  | LOC_Os08g43580.1 |
| DG <sub>PP</sub> | Os052033_01 S6 | 1.320  | 2300.768 | 921.668  | -                |
| DG <sub>PP</sub> | Os052010_01 S6 | -1.246 | 931.430  | 2209.150 | LOC_Os03g57790.1 |
| DG <sub>PP</sub> | Os051961_01 S6 | -1.140 | 266.285  | 586.640  | LOC_Os05g01480.1 |
| DG <sub>PP</sub> | Os051956_01 S6 | 1.416  | 8110.108 | 3039.112 | LOC_Os07g37240.1 |
| DG <sub>PP</sub> | Os051935_01 S6 | -3.089 | 283.153  | 2409.692 | LOC_Os01g15270.1 |
| DG <sub>PP</sub> | Os051817_01 S6 | 1.459  | 565.195  | 205.601  | LOC_Os03g30660.1 |
| DG <sub>PP</sub> | Os051409_01 S6 | 1.351  | 522.929  | 205.062  | LOC_Os12g09954.1 |
| DG <sub>PP</sub> | Os051104_01 S6 | 1.200  | 854.876  | 372.009  | -                |
| DG <sub>PP</sub> | Os050385_01 S6 | 1.676  | 678.797  | 212.479  | -                |
| DG <sub>PP</sub> | Os050312_01 S6 | 1.768  | 3750.263 | 1101.093 | -                |
| DG <sub>PP</sub> | Os049966_01 S6 | 1.125  | 455.308  | 208.732  | LOC_Os04g48820.2 |
| DG <sub>PP</sub> | Os049669_01 S6 | -1.142 | 345.986  | 763.369  | -                |

|                  |                |        |           |          |                  |
|------------------|----------------|--------|-----------|----------|------------------|
| DG <sub>PP</sub> | Os049302_01 S6 | 1.399  | 471.261   | 178.752  | LOC_Os11g25710.1 |
| DG <sub>PP</sub> | Os049163_01 S6 | -1.160 | 118.221   | 264.099  | -                |
| DG <sub>PP</sub> | Os049081_01 S6 | 1.145  | 1822.094  | 824.097  | LOC_Os08g29360.1 |
| DG <sub>PP</sub> | Os048863_01 S6 | 1.110  | 859.262   | 398.202  | LOC_Os08g35440.1 |
| DG <sub>PP</sub> | Os048668_01 S6 | 1.168  | 516.053   | 229.727  | LOC_Os06g43740.1 |
| DG <sub>PP</sub> | Os047560_01 S6 | 1.730  | 1199.446  | 361.576  | LOC_Os07g12890.1 |
| DG <sub>PP</sub> | Os047260_01 S6 | 1.655  | 9137.287  | 2902.040 | LOC_Os06g34840.1 |
| DG <sub>PP</sub> | Os046783_01 S6 | -2.163 | 222.162   | 994.794  | LOC_Os01g13860.1 |
| DG <sub>PP</sub> | Os046147_01 S6 | -1.095 | 188.407   | 402.450  | LOC_Os03g10280.1 |
| DG <sub>PP</sub> | Os046103_01 S6 | 1.484  | 1229.712  | 439.595  | LOC_Os05g33170.1 |
| DG <sub>PP</sub> | Os045964_01 S6 | -1.754 | 144.436   | 487.065  | -                |
| DG <sub>PP</sub> | Os045935_01 S6 | 1.915  | 634.745   | 168.347  | LOC_Os08g16790.1 |
| DG <sub>PP</sub> | Os045928_01 S6 | -1.189 | 125.665   | 286.470  | LOC_Os08g14290.1 |
| DG <sub>PP</sub> | Os045661_01 S6 | 1.189  | 343.298   | 150.587  | LOC_Os10g23180.1 |
| DG <sub>PP</sub> | Os045632_01 S6 | 1.441  | 1614.371  | 594.596  | LOC_Os07g18070.1 |
| DG <sub>PP</sub> | Os045474_01 S6 | -1.125 | 161.116   | 351.292  | LOC_Os06g11610.1 |
| DG <sub>PP</sub> | Os045398_01 S6 | -1.183 | 112.682   | 255.839  | LOC_Os12g25450.1 |
| DG <sub>PP</sub> | Os045347_01 S6 | -3.102 | 107.935   | 926.753  | LOC_Os06g18120.1 |
| DG <sub>PP</sub> | Os045112_01 S6 | 2.543  | 1012.676  | 173.707  | -                |
| DG <sub>PP</sub> | Os045054_01 S6 | 1.159  | 976.548   | 437.406  | -                |
| DG <sub>PP</sub> | Os045034_01 S6 | 1.279  | 1148.318  | 473.285  | LOC_Os10g28160.1 |
| DG <sub>PP</sub> | Os044943_01 S6 | -1.312 | 2065.793  | 5129.766 | LOC_Os07g47750.1 |
| DG <sub>PP</sub> | Os044585_01 S6 | 2.582  | 1065.869  | 177.972  | LOC_Os05g14360.1 |
| DG <sub>PP</sub> | Os044500_01 S6 | 1.120  | 1098.320  | 505.197  | LOC_Os05g02110.1 |
| DG <sub>PP</sub> | Os044300_01 S6 | 2.307  | 28043.626 | 5668.032 | LOC_Os05g11320.1 |
| DG <sub>PP</sub> | Os044170_01 S6 | 2.103  | 1363.415  | 317.338  | LOC_Os01g40200.1 |
| DG <sub>PP</sub> | Os043803_01 S6 | 1.368  | 393.195   | 152.355  | LOC_Os04g20280.1 |
| DG <sub>PP</sub> | Os043797_01 S6 | 1.468  | 328.253   | 118.655  | LOC_Os07g15130.1 |
| DG <sub>PP</sub> | Os043506_01 S6 | -1.272 | 1560.361  | 3767.608 | LOC_Os07g35880.1 |
| DG <sub>PP</sub> | Os043254_01 S6 | 2.031  | 1091.282  | 267.053  | LOC_Os09g18070.1 |
| DG <sub>PP</sub> | Os043189_01 S6 | 1.346  | 1342.595  | 528.110  | LOC_Os04g01610.1 |

|                  |                |        |          |          |                  |
|------------------|----------------|--------|----------|----------|------------------|
| DG <sub>PP</sub> | Os042725_01 S6 | 1.781  | 498.891  | 145.195  | LOC_Os07g35740.1 |
| DG <sub>PP</sub> | Os042603_01 S6 | 1.268  | 349.237  | 144.995  | LOC_Os02g03170.1 |
| DG <sub>PP</sub> | Os041929_01 S6 | 1.110  | 550.863  | 255.225  | LOC_Os06g28320.1 |
| DG <sub>PP</sub> | Os041632_01 S6 | -1.564 | 155.659  | 460.310  | -                |
| DG <sub>PP</sub> | Os040328_01 S6 | -2.024 | 128.360  | 521.885  | LOC_Os05g31400.1 |
| DG <sub>PP</sub> | Os039887_01 S6 | -1.219 | 1101.853 | 2564.916 | LOC_Os10g33360.1 |
| DG <sub>PP</sub> | Os039593_01 S6 | 1.208  | 524.625  | 227.171  | -                |
| DG <sub>PP</sub> | Os038872_01 S6 | 1.374  | 573.762  | 221.420  | LOC_Os12g12590.1 |
| DG <sub>PP</sub> | Os038871_01 S6 | 1.150  | 644.966  | 290.630  | LOC_Os12g12590.1 |
| DG <sub>PP</sub> | Os038695_01 S6 | -1.612 | 154.038  | 470.713  | -                |
| DG <sub>PP</sub> | Os038619_01 S6 | 1.360  | 793.594  | 309.174  | -                |
| DG <sub>PP</sub> | Os038408_01 S6 | 1.493  | 1689.034 | 600.252  | LOC_Os09g25700.1 |
| DG <sub>PP</sub> | Os038128_01 S6 | 1.120  | 390.993  | 179.851  | LOC_Os03g59990.1 |
| DG <sub>PP</sub> | Os038103_01 S6 | -1.350 | 127.497  | 324.894  | LOC_Os10g26670.1 |
| DG <sub>PP</sub> | Os038005_01 S6 | -1.140 | 351.267  | 774.229  | LOC_Os01g71970.1 |
| DG <sub>PP</sub> | Os037265_01 S6 | 1.305  | 625.095  | 253.037  | LOC_Os04g56280.1 |
| DG <sub>PP</sub> | Os037169_01 S6 | 1.931  | 483.792  | 126.908  | LOC_Os11g17940.1 |
| DG <sub>PP</sub> | Os036756_01 S6 | -1.232 | 4014.107 | 9426.864 | LOC_Os08g11970.1 |
| DG <sub>PP</sub> | Os036373_01 S6 | -1.736 | 639.598  | 2129.973 | LOC_Os04g03250.1 |
| DG <sub>PP</sub> | Os035154_01 S6 | -1.096 | 522.022  | 1116.198 | -                |
| DG <sub>PP</sub> | Os034731_01 S6 | -1.145 | 535.747  | 1184.469 | LOC_Os04g04670.1 |
| DG <sub>PP</sub> | Os034680_01 S6 | -1.471 | 322.571  | 894.295  | LOC_Os05g04914.1 |
| DG <sub>PP</sub> | Os034112_01 S6 | 1.154  | 797.302  | 358.294  | LOC_Os02g40130.1 |
| DG <sub>PP</sub> | Os034099_01 S6 | 1.535  | 1093.272 | 377.348  | LOC_Os03g51950.1 |
| DG <sub>PP</sub> | Os033933_01 S6 | -4.447 | 275.948  | 6020.129 | LOC_Os05g51460.1 |
| DG <sub>PP</sub> | Os033915_01 S6 | -1.935 | 288.392  | 1102.521 | LOC_Os11g45530.1 |
| DG <sub>PP</sub> | Os033072_01 S6 | -1.380 | 134.931  | 351.086  | LOC_Os12g29230.1 |
| DG <sub>PP</sub> | Os032897_01 S6 | 2.034  | 680.634  | 166.192  | LOC_Os03g44850.1 |
| DG <sub>PP</sub> | Os032686_01 S6 | -1.110 | 169.986  | 366.832  | LOC_Os05g42250.1 |
| DG <sub>PP</sub> | Os031388_01 S6 | -1.345 | 194.708  | 494.737  | LOC_Os01g08350.1 |
| DG <sub>PP</sub> | Os031169_01 S6 | 1.360  | 289.951  | 112.950  | LOC_Os10g20080.1 |

|                  |                |        |          |           |                  |
|------------------|----------------|--------|----------|-----------|------------------|
| DG <sub>PP</sub> | Os030589_01 S6 | 1.252  | 701.229  | 294.425   | LOC_Os10g08990.1 |
| DG <sub>PP</sub> | Os030368_01 S6 | -1.141 | 1140.309 | 2515.352  | LOC_Os05g40310.1 |
| DG <sub>PP</sub> | Os030119_01 S6 | 1.800  | 913.096  | 262.276   | LOC_Os02g03210.1 |
| DG <sub>PP</sub> | Os030028_01 S6 | -2.638 | 207.732  | 1292.912  | LOC_Os01g02710.1 |
| DG <sub>PP</sub> | Os029975_01 S6 | -1.286 | 304.001  | 741.173   | -                |
| DG <sub>PP</sub> | Os029928_01 S6 | 1.341  | 349.204  | 137.818   | -                |
| DG <sub>PP</sub> | Os029843_01 S6 | 1.188  | 435.284  | 191.019   | LOC_Os05g08650.1 |
| DG <sub>PP</sub> | Os029791_01 S6 | 2.169  | 960.327  | 213.560   | LOC_Os02g52200.1 |
| DG <sub>PP</sub> | Os029743_01 S6 | -1.114 | 240.442  | 520.417   | LOC_Os02g27760.1 |
| DG <sub>PP</sub> | Os029713_01 S6 | 1.578  | 4651.137 | 1557.808  | LOC_Os07g30990.1 |
| DG <sub>PP</sub> | Os029694_01 S6 | 1.546  | 2057.607 | 704.510   | LOC_Os07g41580.1 |
| DG <sub>PP</sub> | Os028834_01 S6 | -1.215 | 807.996  | 1876.090  | LOC_Os03g27070.1 |
| DG <sub>PP</sub> | Os028680_01 S6 | -3.263 | 147.548  | 1416.101  | LOC_Os07g06100.1 |
| DG <sub>PP</sub> | Os028624_01 S6 | -1.467 | 3027.486 | 8369.570  | LOC_Os06g02010.1 |
| DG <sub>PP</sub> | Os028616_01 S6 | 1.132  | 415.162  | 189.434   | LOC_Os11g02440.2 |
| DG <sub>PP</sub> | Os028605_01 S6 | 1.671  | 905.647  | 284.322   | LOC_Os02g06380.1 |
| DG <sub>PP</sub> | Os028334_01 S6 | -1.077 | 815.743  | 1720.455  | LOC_Os02g53290.1 |
| DG <sub>PP</sub> | Os028157_01 S6 | 1.907  | 1787.603 | 476.647   | LOC_Os10g32110.1 |
| DG <sub>PP</sub> | Os028059_01 S6 | -1.222 | 257.112  | 599.708   | LOC_Os04g26510.1 |
| DG <sub>PP</sub> | Os027934_01 S6 | -1.172 | 153.762  | 346.580   | LOC_Os06g06270.1 |
| DG <sub>PP</sub> | Os027678_01 S6 | 1.096  | 1026.500 | 480.143   | -                |
| DG <sub>PP</sub> | Os026464_01 S6 | 1.225  | 1121.209 | 479.491   | LOC_Os09g34100.1 |
| DG <sub>PP</sub> | Os025959_01 S6 | 1.518  | 850.488  | 296.977   | LOC_Os12g43780.1 |
| DG <sub>PP</sub> | Os025863_01 S6 | -1.096 | 516.435  | 1104.287  | LOC_Os01g69290.1 |
| DG <sub>PP</sub> | Os025832_01 S6 | -1.125 | 229.385  | 500.325   | LOC_Os04g33240.1 |
| DG <sub>PP</sub> | Os025815_01 S6 | -1.125 | 154.889  | 337.772   | LOC_Os01g67410.1 |
| DG <sub>PP</sub> | Os025809_01 S6 | -1.228 | 320.055  | 749.941   | LOC_Os09g15230.1 |
| DG <sub>PP</sub> | Os025762_01 S6 | 2.365  | 1208.171 | 234.592   | LOC_Os05g25260.1 |
| DG <sub>PP</sub> | Os025528_01 S6 | -1.523 | 8361.827 | 24038.246 | -                |
| DG <sub>PP</sub> | Os025405_01 S6 | 2.930  | 1136.781 | 149.203   | LOC_Os10g41960.1 |
| DG <sub>PP</sub> | Os024882_01 S6 | 1.103  | 367.303  | 170.960   | LOC_Os09g31120.1 |

|                  |                |        |          |          |                  |
|------------------|----------------|--------|----------|----------|------------------|
| DG <sub>PP</sub> | Os024778_01 S6 | -1.455 | 140.458  | 385.018  | LOC_Os05g30800.1 |
| DG <sub>PP</sub> | Os024766_01 S6 | 1.198  | 382.085  | 166.521  | LOC_Os03g64360.1 |
| DG <sub>PP</sub> | Os024723_01 S6 | 1.553  | 531.686  | 181.232  | LOC_Os11g05490.1 |
| DG <sub>PP</sub> | Os024616_01 S6 | 1.293  | 508.347  | 207.485  | -                |
| DG <sub>PP</sub> | Os024561_01 S6 | -1.324 | 397.277  | 994.647  | LOC_Os04g01740.1 |
| DG <sub>PP</sub> | Os024437_01 S6 | 1.170  | 1014.893 | 450.950  | -                |
| DG <sub>PP</sub> | Os024270_01 S6 | -1.152 | 298.722  | 663.793  | LOC_Os05g36990.1 |
| DG <sub>PP</sub> | Os024095_01 S6 | 1.377  | 527.737  | 203.216  | LOC_Os04g47900.1 |
| DG <sub>PP</sub> | Os024079_01 S6 | -1.142 | 193.423  | 426.792  | LOC_Os07g24230.1 |
| DG <sub>PP</sub> | Os024078_01 S6 | -1.284 | 150.673  | 366.953  | LOC_Os06g44250.1 |
| DG <sub>PP</sub> | Os024059_01 S6 | 1.170  | 2621.613 | 1165.371 | -                |
| DG <sub>PP</sub> | Os023998_01 S6 | 1.691  | 664.981  | 205.944  | LOC_Os08g42570.1 |
| DG <sub>PP</sub> | Os023983_01 S6 | -1.942 | 248.225  | 953.833  | LOC_Os02g58500.1 |
| DG <sub>PP</sub> | Os023589_01 S6 | -2.392 | 229.898  | 1206.528 | LOC_Os05g05650.1 |
| DG <sub>PP</sub> | Os023350_01 S6 | 1.772  | 3410.538 | 998.281  | LOC_Os12g42280.1 |
| DG <sub>PP</sub> | Os023118_01 S6 | -3.546 | 125.070  | 1461.105 | LOC_Os07g11120.1 |
| DG <sub>PP</sub> | Os022954_01 S6 | 1.224  | 606.414  | 259.663  | LOC_Os08g34170.1 |
| DG <sub>PP</sub> | Os022620_01 S6 | -1.780 | 260.472  | 894.493  | LOC_Os10g09930.1 |
| DG <sub>PP</sub> | Os022563_01 S6 | -1.422 | 125.587  | 336.490  | LOC_Os06g04290.1 |
| DG <sub>PP</sub> | Os022434_01 S6 | 1.182  | 961.959  | 424.021  | LOC_Os01g67310.1 |
| DG <sub>PP</sub> | Os022309_01 S6 | -1.374 | 377.104  | 977.547  | LOC_Os05g10670.1 |
| DG <sub>PP</sub> | Os022291_01 S6 | -1.639 | 611.475  | 1904.726 | LOC_Os03g16880.1 |
| DG <sub>PP</sub> | Os022228_01 S6 | 1.419  | 1696.737 | 634.722  | LOC_Os10g41250.1 |
| DG <sub>PP</sub> | Os022195_01 S6 | -1.203 | 243.066  | 559.752  | -                |
| DG <sub>PP</sub> | Os022143_01 S6 | -1.151 | 870.729  | 1933.978 | LOC_Os05g51590.1 |
| DG <sub>PP</sub> | Os021943_01 S6 | -2.303 | 139.815  | 690.145  | LOC_Os02g02000.1 |
| DG <sub>PP</sub> | Os021916_01 S6 | -1.206 | 176.602  | 407.418  | LOC_Os03g56950.4 |
| DG <sub>PP</sub> | Os021870_01 S6 | -1.673 | 208.386  | 664.483  | LOC_Os07g41060.1 |
| DG <sub>PP</sub> | Os021757_01 S6 | 1.817  | 616.787  | 175.002  | LOC_Os09g36740.1 |
| DG <sub>PP</sub> | Os021726_01 S6 | -1.531 | 496.722  | 1435.566 | LOC_Os03g06080.1 |
| DG <sub>PP</sub> | Os021458_01 S6 | 1.370  | 658.099  | 254.563  | LOC_Os07g14270.1 |



|                  |                |        |          |          |                  |
|------------------|----------------|--------|----------|----------|------------------|
| DG <sub>PP</sub> | Os021365_01 S6 | 1.097  | 436.097  | 203.827  | LOC_Os08g24434.1 |
| DG <sub>PP</sub> | Os021254_01 S6 | -1.572 | 170.764  | 507.779  | LOC_Os02g46660.1 |
| DG <sub>PP</sub> | Os021048_01 S6 | -2.259 | 143.016  | 684.333  | LOC_Os01g63270.1 |
| DG <sub>PP</sub> | Os020953_01 S6 | -1.295 | 123.546  | 303.246  | LOC_Os07g31450.1 |
| DG <sub>PP</sub> | Os020930_01 S6 | -1.927 | 231.971  | 881.965  | LOC_Os06g04390.1 |
| DG <sub>PP</sub> | Os020877_01 S6 | -1.373 | 139.821  | 362.269  | LOC_Os05g09490.2 |
| DG <sub>PP</sub> | Os020765_01 S6 | -1.284 | 305.109  | 742.751  | LOC_Os01g09990.1 |
| DG <sub>PP</sub> | Os020694_01 S6 | -1.987 | 196.018  | 776.972  | LOC_Os09g33680.1 |
| DG <sub>PP</sub> | Os020686_01 S6 | -1.104 | 302.567  | 650.508  | LOC_Os01g22090.1 |
| DG <sub>PP</sub> | Os020606_01 S6 | -1.100 | 168.669  | 361.600  | LOC_Os07g33270.1 |
| DG <sub>PP</sub> | Os020447_01 S6 | 1.631  | 794.284  | 256.534  | LOC_Os01g32350.2 |
| DG <sub>PP</sub> | Os020398_01 S6 | -1.375 | 224.163  | 581.275  | LOC_Os03g54000.1 |
| DG <sub>PP</sub> | Os020392_01 S6 | 2.068  | 1207.828 | 288.077  | LOC_Os03g15050.2 |
| DG <sub>PP</sub> | Os020367_01 S6 | 1.171  | 268.804  | 119.372  | LOC_Os01g15630.1 |
| DG <sub>PP</sub> | Os020213_01 S6 | -1.281 | 168.280  | 409.023  | LOC_Os01g71980.1 |
| DG <sub>PP</sub> | Os020088_01 S6 | -1.533 | 263.385  | 762.309  | LOC_Os05g03120.2 |
| DG <sub>PP</sub> | Os019787_01 S6 | -1.155 | 175.480  | 390.690  | LOC_Os05g33100.1 |
| DG <sub>PP</sub> | Os019650_01 S6 | -1.165 | 202.734  | 454.447  | LOC_Os07g48200.1 |
| DG <sub>PP</sub> | Os018882_01 S6 | 1.465  | 821.902  | 297.647  | LOC_Os03g27790.1 |
| DG <sub>PP</sub> | Os018818_01 S6 | 2.307  | 1417.543 | 286.456  | -                |
| DG <sub>PP</sub> | Os018786_01 S6 | 1.617  | 1034.521 | 337.181  | LOC_Os03g16670.1 |
| DG <sub>PP</sub> | Os018767_01 S6 | 1.449  | 660.787  | 242.064  | LOC_Os04g32050.1 |
| DG <sub>PP</sub> | Os018766_01 S6 | 1.719  | 1153.051 | 350.216  | LOC_Os04g40670.1 |
| DG <sub>PP</sub> | Os018745_01 S6 | 1.169  | 571.628  | 254.189  | LOC_Os01g17240.1 |
| DG <sub>PP</sub> | Os018724_01 S6 | 1.203  | 2135.804 | 927.734  | LOC_Os07g38270.1 |
| DG <sub>PP</sub> | Os018709_01 S6 | -2.527 | 146.426  | 843.923  | LOC_Os05g33810.1 |
| DG <sub>PP</sub> | Os018432_01 S6 | -1.104 | 146.084  | 313.947  | LOC_Os08g42420.5 |
| DG <sub>PP</sub> | Os018327_01 S6 | -1.150 | 192.496  | 427.037  | LOC_Os12g05650.1 |
| DG <sub>PP</sub> | Os018214_01 S6 | -1.391 | 114.819  | 301.070  | LOC_Os08g12750.2 |
| DG <sub>PP</sub> | Os018072_01 S6 | -2.694 | 151.710  | 981.595  | LOC_Os05g46250.1 |
| DG <sub>PP</sub> | Os018049_01 S6 | -1.416 | 405.775  | 1082.823 | LOC_Os03g49630.1 |

|                  |             |    |        |          |          |                  |
|------------------|-------------|----|--------|----------|----------|------------------|
| DG <sub>PP</sub> | Os017890_01 | S6 | -1.261 | 437.417  | 1048.268 | LOC_Os06g30750.1 |
| DG <sub>PP</sub> | Os017820_01 | S6 | -1.267 | 275.540  | 663.287  | LOC_Os04g36062.1 |
| DG <sub>PP</sub> | Os017585_01 | S6 | -1.123 | 284.773  | 620.171  | LOC_Os03g56790.1 |
| DG <sub>PP</sub> | Os017372_01 | S6 | 1.361  | 494.575  | 192.521  | LOC_Os11g45720.1 |
| DG <sub>PP</sub> | Os017063_01 | S6 | -1.242 | 104.792  | 247.870  | LOC_Os02g34840.1 |
| DG <sub>PP</sub> | Os017058_01 | S6 | -1.350 | 377.466  | 962.362  | LOC_Os05g33940.1 |
| DG <sub>PP</sub> | Os016972_01 | S6 | -2.157 | 137.904  | 615.133  | LOC_Os12g20150.1 |
| DG <sub>PP</sub> | Os016931_01 | S6 | -1.271 | 133.517  | 322.115  | LOC_Os11g11100.1 |
| DG <sub>PP</sub> | Os016870_01 | S6 | 1.518  | 721.178  | 251.757  | LOC_Os02g56280.1 |
| DG <sub>PP</sub> | Os016869_01 | S6 | 1.216  | 2734.130 | 1177.047 | LOC_Os01g08700.6 |
| DG <sub>PP</sub> | Os016859_01 | S6 | -1.239 | 296.773  | 700.395  | LOC_Os05g37520.1 |
| DG <sub>PP</sub> | Os016790_01 | S6 | 1.825  | 529.984  | 149.562  | LOC_Os04g38220.1 |
| DG <sub>PP</sub> | Os016770_01 | S6 | 2.186  | 984.028  | 216.228  | LOC_Os07g30760.2 |
| DG <sub>PP</sub> | Os016758_01 | S6 | -1.402 | 176.360  | 466.157  | LOC_Os11g32110.4 |
| DG <sub>PP</sub> | Os016458_01 | S6 | -1.499 | 361.392  | 1021.645 | LOC_Os01g22010.3 |
| DG <sub>PP</sub> | Os016309_01 | S6 | -1.273 | 920.636  | 2225.571 | LOC_Os10g28360.1 |
| DG <sub>PP</sub> | Os016284_01 | S6 | 1.457  | 788.997  | 287.310  | LOC_Os05g34650.1 |
| DG <sub>PP</sub> | Os016218_01 | S6 | -1.107 | 514.991  | 1109.134 | LOC_Os03g53300.2 |
| DG <sub>PP</sub> | Os016171_01 | S6 | -1.407 | 137.108  | 363.492  | LOC_Os12g37870.1 |
| DG <sub>PP</sub> | Os016108_01 | S6 | 1.553  | 542.009  | 184.777  | LOC_Os03g52720.1 |
| DG <sub>PP</sub> | Os016101_01 | S6 | 1.094  | 560.470  | 262.474  | LOC_Os03g29920.1 |
| DG <sub>PP</sub> | Os016029_01 | S6 | -1.195 | 233.772  | 535.264  | LOC_Os08g06250.1 |
| DG <sub>PP</sub> | Os015845_01 | S6 | -1.653 | 128.349  | 403.723  | LOC_Os05g03550.1 |
| DG <sub>PP</sub> | Os015744_01 | S6 | 1.544  | 1561.075 | 535.428  | LOC_Os04g54790.1 |
| DG <sub>PP</sub> | Os015273_01 | S6 | -1.200 | 193.022  | 443.509  | LOC_Os03g10240.1 |
| DG <sub>PP</sub> | Os015156_01 | S6 | 1.787  | 1022.210 | 296.108  | LOC_Os01g08460.1 |
| DG <sub>PP</sub> | Os015044_01 | S6 | -1.282 | 187.684  | 456.256  | LOC_Os03g55640.1 |
| DG <sub>PP</sub> | Os015012_01 | S6 | 1.499  | 1097.671 | 388.403  | LOC_Os01g10450.2 |
| DG <sub>PP</sub> | Os014862_01 | S6 | -1.089 | 135.676  | 288.646  | LOC_Os09g12750.1 |
| DG <sub>PP</sub> | Os014801_01 | S6 | -1.532 | 164.749  | 476.568  | LOC_Os06g40210.1 |
| DG <sub>PP</sub> | Os014740_01 | S6 | -1.096 | 1109.617 | 2371.947 | LOC_Os07g36080.1 |

|                  |                |        |           |           |                  |
|------------------|----------------|--------|-----------|-----------|------------------|
| DG <sub>PP</sub> | Os014533_01 S6 | -1.207 | 148.987   | 343.906   | LOC_Os07g37650.1 |
| DG <sub>PP</sub> | Os014490_01 S6 | 1.525  | 372.183   | 129.326   | LOC_Os02g13100.1 |
| DG <sub>PP</sub> | Os014374_01 S6 | 2.043  | 999.954   | 242.618   | LOC_Os10g26990.1 |
| DG <sub>PP</sub> | Os014301_01 S6 | -1.505 | 625.955   | 1776.184  | -                |
| DG <sub>PP</sub> | Os014273_01 S6 | 1.265  | 551.005   | 229.283   | LOC_Os03g48030.1 |
| DG <sub>PP</sub> | Os014200_01 S6 | -1.209 | 153.105   | 353.862   | LOC_Os03g52680.1 |
| DG <sub>PP</sub> | Os013987_01 S6 | -1.870 | 187.089   | 683.656   | LOC_Os08g01170.1 |
| DG <sub>PP</sub> | Os013940_01 S6 | -1.451 | 199.022   | 544.271   | -                |
| DG <sub>PP</sub> | Os013860_01 S6 | -1.139 | 101.118   | 222.731   | LOC_Os10g35720.1 |
| DG <sub>PP</sub> | Os013857_01 S6 | 1.172  | 787.897   | 349.750   | LOC_Os09g08390.1 |
| DG <sub>PP</sub> | Os013689_01 S6 | -1.394 | 182.271   | 479.062   | LOC_Os04g53860.1 |
| DG <sub>PP</sub> | Os013668_01 S6 | -1.268 | 124.937   | 300.958   | LOC_Os03g42900.1 |
| DG <sub>PP</sub> | Os013619_01 S6 | 1.338  | 439.775   | 173.962   | -                |
| DG <sub>PP</sub> | Os013532_01 S6 | 2.115  | 1491.245  | 344.342   | LOC_Os01g55094.2 |
| DG <sub>PP</sub> | Os013424_01 S6 | -1.180 | 100.078   | 226.726   | LOC_Os05g49380.2 |
| DG <sub>PP</sub> | Os013284_01 S6 | -1.422 | 527.015   | 1412.009  | LOC_Os09g28630.1 |
| DG <sub>PP</sub> | Os013267_01 S6 | 1.728  | 1165.930  | 351.850   | LOC_Os02g29550.2 |
| DG <sub>PP</sub> | Os013156_01 S6 | 1.325  | 914.088   | 364.887   | LOC_Os03g62240.1 |
| DG <sub>PP</sub> | Os012915_01 S6 | 1.495  | 593.400   | 210.492   | LOC_Os01g61970.1 |
| DG <sub>PP</sub> | Os012329_01 S6 | -2.031 | 404.275   | 1652.665  | LOC_Os03g34040.1 |
| DG <sub>PP</sub> | Os012299_01 S6 | -1.711 | 375.103   | 1228.373  | LOC_Os09g38030.1 |
| DG <sub>PP</sub> | Os012239_01 S6 | 1.294  | 1125.851  | 459.286   | -                |
| DG <sub>PP</sub> | Os012205_01 S6 | -1.628 | 205.011   | 633.832   | LOC_Os01g74650.3 |
| DG <sub>PP</sub> | Os012017_01 S6 | -1.405 | 152.493   | 403.768   | LOC_Os05g33520.1 |
| DG <sub>PP</sub> | Os012005_01 S6 | 1.283  | 465.087   | 191.079   | LOC_Os03g58640.1 |
| DG <sub>PP</sub> | Os011875_01 S6 | -1.247 | 260.959   | 619.460   | LOC_Os04g57300.2 |
| DG <sub>PP</sub> | Os011816_01 S6 | 1.671  | 651.060   | 204.388   | -                |
| DG <sub>PP</sub> | Os011490_01 S6 | 1.173  | 438.079   | 194.350   | LOC_Os04g02580.1 |
| DG <sub>PP</sub> | Os011429_01 S6 | -1.213 | 11030.225 | 25568.953 | LOC_Os09g39500.1 |
| DG <sub>PP</sub> | Os011412_01 S6 | -1.628 | 125.325   | 387.366   | LOC_Os11g37050.1 |
| DG <sub>PP</sub> | Os011344_01 S6 | 1.812  | 1388.352  | 395.489   | -                |

|                  |                |        |          |          |                  |
|------------------|----------------|--------|----------|----------|------------------|
| DG <sub>PP</sub> | Os011207_01 S6 | -1.253 | 108.249  | 258.058  | LOC_Os02g16620.1 |
| DG <sub>PP</sub> | Os011090_01 S6 | 1.581  | 584.649  | 195.443  | LOC_Os04g31140.1 |
| DG <sub>PP</sub> | Os011079_01 S6 | 1.274  | 300.241  | 124.111  | LOC_Os04g45920.1 |
| DG <sub>PP</sub> | Os010947_01 S6 | 1.671  | 551.844  | 173.265  | -                |
| DG <sub>PP</sub> | Os010705_01 S6 | -1.427 | 163.855  | 440.441  | LOC_Os12g34130.1 |
| DG <sub>PP</sub> | Os010677_01 S6 | 1.185  | 485.746  | 213.642  | -                |
| DG <sub>PP</sub> | Os010507_01 S6 | 1.220  | 323.859  | 139.039  | -                |
| DG <sub>PP</sub> | Os010501_01 S6 | 1.320  | 923.602  | 369.995  | LOC_Os09g26670.1 |
| DG <sub>PP</sub> | Os010136_01 S6 | 2.251  | 1439.671 | 302.425  | LOC_Os11g06730.1 |
| DG <sub>PP</sub> | Os010113_01 S6 | -1.200 | 3207.295 | 7367.906 | LOC_Os08g34210.1 |
| DG <sub>PP</sub> | Os010073_01 S6 | -2.154 | 220.344  | 980.525  | LOC_Os07g40986.1 |
| DG <sub>PP</sub> | Os009881_01 S6 | -1.687 | 266.157  | 856.858  | LOC_Os06g05180.1 |
| DG <sub>PP</sub> | Os009844_01 S6 | 1.213  | 6854.300 | 2957.533 | LOC_Os12g08730.1 |
| DG <sub>PP</sub> | Os009787_01 S6 | -2.932 | 440.810  | 3364.262 | LOC_Os07g23120.1 |
| DG <sub>PP</sub> | Os009659_01 S6 | 1.115  | 611.783  | 282.518  | LOC_Os03g62010.1 |
| DG <sub>PP</sub> | Os009604_01 S6 | 1.256  | 535.732  | 224.302  | LOC_Os07g43810.1 |
| DG <sub>PP</sub> | Os009377_01 S6 | 1.311  | 651.497  | 262.607  | LOC_Os12g12580.1 |
| DG <sub>PP</sub> | Os009161_01 S6 | -1.078 | 125.837  | 265.639  | LOC_Os08g09690.1 |
| DG <sub>PP</sub> | Os009127_01 S6 | 1.131  | 416.477  | 190.214  | LOC_Os03g41675.1 |
| DG <sub>PP</sub> | Os009123_01 S6 | -1.281 | 144.086  | 350.021  | LOC_Os02g32980.1 |
| DG <sub>PP</sub> | Os009106_01 S6 | -1.146 | 1361.735 | 3012.977 | LOC_Os02g52770.1 |
| DG <sub>PP</sub> | Os009079_01 S6 | 1.203  | 325.228  | 141.279  | LOC_Os02g42314.2 |
| DG <sub>PP</sub> | Os008896_01 S6 | -1.473 | 222.007  | 616.086  | LOC_Os04g51520.1 |
| DG <sub>PP</sub> | Os008805_01 S6 | 1.357  | 329.988  | 128.820  | -                |
| DG <sub>PP</sub> | Os008602_01 S6 | 1.300  | 1066.366 | 433.111  | LOC_Os05g06920.1 |
| DG <sub>PP</sub> | Os008538_01 S6 | 1.430  | 734.371  | 272.530  | LOC_Os03g18070.1 |
| DG <sub>PP</sub> | Os008529_01 S6 | -1.786 | 234.250  | 808.045  | LOC_Os07g02210.2 |
| DG <sub>PP</sub> | Os008441_01 S6 | 1.140  | 754.025  | 342.101  | LOC_Os03g49190.1 |
| DG <sub>PP</sub> | Os008192_01 S6 | 1.463  | 740.190  | 268.490  | LOC_Os09g24620.1 |
| DG <sub>PP</sub> | Os008169_01 S6 | 2.790  | 2203.978 | 318.650  | LOC_Os02g40240.2 |
| DG <sub>PP</sub> | Os007907_01 S6 | 1.169  | 366.132  | 162.804  | LOC_Os09g03680.1 |

|                  |             |    |        |           |          |                  |
|------------------|-------------|----|--------|-----------|----------|------------------|
| DG <sub>PP</sub> | Os007747_01 | S6 | 1.454  | 592.611   | 216.345  | LOC_Os02g06300.1 |
| DG <sub>PP</sub> | Os006650_01 | S6 | 1.098  | 284.836   | 133.060  | LOC_Os11g06860.2 |
| DG <sub>PP</sub> | Os006592_01 | S6 | 1.879  | 732.091   | 199.023  | -                |
| DG <sub>PP</sub> | Os006587_01 | S6 | 1.349  | 1294.287  | 507.939  | -                |
| DG <sub>PP</sub> | Os004406_01 | S6 | 1.414  | 1392.562  | 522.635  | LOC_Os09g28390.1 |
| DG <sub>PP</sub> | Os004287_01 | S6 | 1.252  | 270.357   | 113.508  | LOC_Os03g28140.1 |
| DG <sub>PP</sub> | Os003424_01 | S6 | 1.674  | 484.028   | 151.679  | LOC_Os12g29550.1 |
| DG <sub>PP</sub> | Os003269_01 | S6 | -1.114 | 232.620   | 503.444  | LOC_Os12g05200.1 |
| DG <sub>PP</sub> | Os003186_01 | S6 | -1.994 | 372.858   | 1485.322 | LOC_Os05g46780.1 |
| DG <sub>PP</sub> | Os002911_01 | S6 | 1.410  | 532.804   | 200.456  | LOC_Os08g32130.1 |
| DG <sub>PP</sub> | Os002866_01 | S6 | 1.525  | 806.925   | 280.316  | LOC_Os03g57690.1 |
| DG <sub>PP</sub> | Os002678_01 | S6 | 2.294  | 3326.571  | 678.329  | LOC_Os05g03920.1 |
| DG <sub>PP</sub> | Os002486_01 | S6 | 1.347  | 367.468   | 144.489  | LOC_Os02g12480.1 |
| DG <sub>PP</sub> | Os002390_01 | S6 | 1.505  | 2163.016  | 761.834  | LOC_Os07g05360.1 |
| DG <sub>PP</sub> | Os002353_01 | S6 | -2.204 | 337.468   | 1554.653 | LOC_Os03g38470.1 |
| DG <sub>PP</sub> | Os002325_01 | S6 | 1.194  | 2633.235  | 1151.093 | LOC_Os09g38750.1 |
| DG <sub>PP</sub> | Os002113_01 | S6 | 1.361  | 2556.093  | 995.427  | LOC_Os12g06780.1 |
| DG <sub>PP</sub> | Os001903_01 | S6 | 1.546  | 602.550   | 206.285  | LOC_Os01g68290.1 |
| DG <sub>PP</sub> | Os001566_01 | S6 | 1.154  | 332.714   | 149.521  | LOC_Os02g47580.1 |
| DG <sub>PP</sub> | Os000994_01 | S6 | -1.508 | 429.314   | 1220.749 | -                |
| DG <sub>PP</sub> | Os000965_01 | S6 | 1.110  | 986.300   | 456.791  | LOC_Os01g73990.1 |
| DG <sub>PP</sub> | Os000875_01 | S6 | -1.332 | 161.295   | 406.105  | LOC_Os07g46180.1 |
| DG <sub>PP</sub> | Os000754_01 | S6 | 1.601  | 428.814   | 141.344  | LOC_Os12g19304.3 |
| DG <sub>PP</sub> | Os000431_01 | S6 | 2.405  | 26743.943 | 5047.911 | LOC_Os01g68300.1 |
| DG <sub>PP</sub> | Os000375_01 | S6 | -1.209 | 1278.712  | 2956.818 | LOC_Os02g09590.1 |
| DG <sub>PP</sub> | Os000322_01 | S6 | 1.131  | 794.664   | 362.852  | LOC_Os07g28610.2 |
| DG <sub>PP</sub> | Os000282_01 | S6 | -1.217 | 516.492   | 1200.853 | LOC_Os03g60100.1 |
| DG <sub>PP</sub> | Os000252_01 | S6 | -1.158 | 227.187   | 506.898  | LOC_Os02g47140.2 |
| DG <sub>PP</sub> | Os000041_01 | S6 | 1.389  | 1389.785  | 530.749  | LOC_Os10g38700.1 |
| DG <sub>PP</sub> | Os035342_01 | S7 | 1.716  | 1072.365  | 326.414  | LOC_Os12g21870.1 |
| DG <sub>PP</sub> | Os032593_01 | S7 | 1.774  | 541.457   | 158.302  | LOC_Os01g33350.1 |

|                  |             |    |       |          |          |                  |
|------------------|-------------|----|-------|----------|----------|------------------|
| DG <sub>PP</sub> | Os034873_01 | S7 | 3.093 | 1301.295 | 152.506  | LOC_Os11g38720.1 |
| DG <sub>PP</sub> | Os008661_01 | S7 | 1.627 | 542.617  | 175.662  | LOC_Os08g02550.1 |
| DG <sub>PP</sub> | Os009368_01 | S7 | 1.621 | 5441.203 | 1768.468 | LOC_Os01g49290.1 |
| DG <sub>PP</sub> | Os010136_01 | S7 | 2.111 | 1162.622 | 269.170  | LOC_Os11g06730.1 |
| DG <sub>PP</sub> | Os009120_01 | S7 | 2.198 | 6024.391 | 1313.047 | LOC_Os08g13440.2 |
| DG <sub>PP</sub> | Os010230_01 | S7 | 1.707 | 623.957  | 191.061  | -                |
| DG <sub>PP</sub> | Os039064_01 | S7 | 1.689 | 623.128  | 193.222  | LOC_Os03g12230.1 |
| DG <sub>PP</sub> | Os000205_01 | S7 | 1.969 | 907.306  | 231.751  | LOC_Os04g42860.1 |
| DG <sub>PP</sub> | Os010928_01 | S7 | 1.739 | 7502.362 | 2247.378 | LOC_Os01g52490.1 |
| DG <sub>PP</sub> | Os028157_01 | S7 | 1.964 | 1780.059 | 456.368  | LOC_Os10g32110.1 |
| DG <sub>PP</sub> | Os031648_01 | S7 | 2.124 | 875.313  | 200.829  | LOC_Os07g01450.1 |
| DG <sub>PP</sub> | Os005879_01 | S7 | 1.714 | 499.508  | 152.267  | LOC_Os09g37610.1 |
| DG <sub>PP</sub> | Os008785_01 | S7 | 2.077 | 2845.076 | 674.364  | LOC_Os04g35300.1 |
| DG <sub>PP</sub> | Os038506_01 | S7 | 1.974 | 1787.501 | 454.965  | LOC_Os02g09150.2 |
| DG <sub>PP</sub> | Os029766_01 | S7 | 1.615 | 1019.379 | 332.796  | LOC_Os07g06400.1 |
| DG <sub>PP</sub> | Os037857_01 | S7 | 2.602 | 7827.503 | 1289.162 | LOC_Os01g42234.1 |
| DG <sub>PP</sub> | Os056838_01 | S7 | 1.768 | 2495.679 | 732.762  | LOC_Os04g41970.1 |
| DG <sub>PP</sub> | Os037412_01 | S7 | 1.752 | 1404.675 | 416.978  | LOC_Os10g20910.1 |
| DG <sub>PP</sub> | Os040886_01 | S7 | 1.662 | 791.138  | 249.935  | LOC_Os11g11430.1 |
| DG <sub>PP</sub> | Os008778_01 | S7 | 1.687 | 7913.996 | 2457.547 | LOC_Os05g31000.1 |
| DG <sub>PP</sub> | Os009912_01 | S7 | 2.061 | 8621.067 | 2066.495 | LOC_Os05g47890.1 |
| DG <sub>PP</sub> | Os040743_01 | S7 | 2.657 | 900.911  | 142.868  | LOC_Os07g05510.1 |
| DG <sub>PP</sub> | Os057099_02 | S7 | 1.813 | 998.664  | 284.202  | LOC_Os05g48290.3 |
| DG <sub>PP</sub> | Os037162_01 | S7 | 1.710 | 497.853  | 152.219  | LOC_Os04g28120.1 |
| DG <sub>PP</sub> | Os034911_01 | S7 | 1.861 | 622.863  | 171.473  | LOC_Os08g09030.1 |
| DG <sub>PP</sub> | Os008947_01 | S7 | 3.125 | 5345.580 | 612.866  | LOC_Os08g08980.1 |
| DG <sub>PP</sub> | Os010444_01 | S7 | 2.399 | 641.147  | 121.554  | -                |
| DG <sub>PP</sub> | Os027656_01 | S7 | 1.879 | 5749.588 | 1563.154 | LOC_Os10g39420.1 |
| DG <sub>PP</sub> | Os000208_01 | S7 | 1.680 | 1219.405 | 380.437  | LOC_Os02g09150.1 |
| DG <sub>PP</sub> | Os000273_01 | S7 | 1.957 | 2014.882 | 519.033  | LOC_Os04g48490.1 |
| DG <sub>PP</sub> | Os001367_01 | S7 | 1.760 | 4107.665 | 1213.111 | LOC_Os11g40590.3 |

|                  |                |       |           |          |                  |
|------------------|----------------|-------|-----------|----------|------------------|
| DG <sub>PP</sub> | Os002827_01 S7 | 1.887 | 2522.803  | 681.934  | -                |
| DG <sub>PP</sub> | Os008617_01 S7 | 1.903 | 1060.186  | 283.573  | LOC_Os07g33680.1 |
| DG <sub>PP</sub> | Os009036_01 S7 | 2.049 | 9837.435  | 2377.393 | LOC_Os12g30540.1 |
| DG <sub>PP</sub> | Os040237_01 S7 | 1.640 | 1684.459  | 540.483  | LOC_Os02g22770.1 |
| DG <sub>PP</sub> | Os029603_01 S7 | 1.760 | 918.622   | 271.298  | LOC_Os10g25180.1 |
| DG <sub>PP</sub> | Os031586_01 S7 | 2.538 | 10161.023 | 1749.461 | LOC_Os08g08920.1 |
| DG <sub>PP</sub> | Os030245_01 S7 | 1.763 | 389.911   | 114.864  | LOC_Os06g16290.1 |
| DG <sub>PP</sub> | Os006619_01 S7 | 2.076 | 591.052   | 140.223  | LOC_Os06g44310.1 |
| DG <sub>PP</sub> | Os038961_01 S7 | 1.993 | 1361.908  | 342.214  | LOC_Os03g46560.1 |
| DG <sub>PP</sub> | Os008783_01 S7 | 2.343 | 3803.112  | 749.351  | LOC_Os01g16890.1 |
| DG <sub>PP</sub> | Os009458_01 S7 | 1.881 | 406.489   | 110.352  | LOC_Os08g06420.1 |
| DG <sub>PP</sub> | Os009887_01 S7 | 2.188 | 1893.730  | 415.685  | LOC_Os03g16440.1 |
| DG <sub>PP</sub> | Os027065_01 S7 | 1.832 | 2894.410  | 812.996  | LOC_Os02g17210.1 |
| DG <sub>PP</sub> | Os034857_01 S7 | 1.643 | 463.214   | 148.317  | LOC_Os11g01510.3 |
| DG <sub>PP</sub> | Os000219_01 S7 | 1.655 | 784.479   | 249.094  | LOC_Os09g36830.1 |
| DG <sub>PP</sub> | Os000242_01 S7 | 1.716 | 595.738   | 181.294  | LOC_Os12g05040.3 |
| DG <sub>PP</sub> | Os001672_01 S7 | 1.619 | 446.038   | 145.243  | LOC_Os03g42220.1 |
| DG <sub>PP</sub> | Os036068_01 S7 | 1.690 | 1355.299  | 419.956  | LOC_Os12g07490.1 |
| DG <sub>PP</sub> | Os041014_01 S7 | 1.632 | 1540.480  | 497.029  | -                |
| DG <sub>PP</sub> | Os000533_01 S7 | 1.879 | 1496.825  | 406.989  | LOC_Os06g10760.1 |
| DG <sub>PP</sub> | Os006414_01 S7 | 2.618 | 3490.680  | 568.777  | LOC_Os01g51020.1 |
| DG <sub>PP</sub> | Os008917_01 S7 | 1.990 | 870.728   | 219.129  | LOC_Os05g22940.1 |
| DG <sub>PP</sub> | Os009300_01 S7 | 2.224 | 1154.110  | 246.999  | LOC_Os07g30154.1 |
| DG <sub>PP</sub> | Os010088_01 S7 | 2.168 | 3633.581  | 808.317  | LOC_Os03g14530.1 |
| DG <sub>PP</sub> | Os040593_01 S7 | 2.117 | 1064.994  | 245.438  | LOC_Os01g34614.1 |
| DG <sub>PP</sub> | Os036816_01 S7 | 1.877 | 2521.419  | 686.222  | LOC_Os07g30640.1 |
| DG <sub>PP</sub> | Os008681_01 S7 | 1.891 | 416.436   | 112.263  | LOC_Os06g45000.2 |
| DG <sub>PP</sub> | Os009387_01 S7 | 2.061 | 1835.114  | 439.728  | LOC_Os07g42600.1 |
| DG <sub>PP</sub> | Os010884_01 S7 | 2.047 | 1595.072  | 386.011  | LOC_Os12g03110.1 |
| DG <sub>PP</sub> | Os009163_01 S7 | 1.634 | 882.910   | 284.401  | LOC_Os02g05830.1 |
| DG <sub>PP</sub> | Os000442_01 S7 | 2.455 | 1080.669  | 197.044  | LOC_Os03g01320.1 |

|                  |                |       |          |          |                  |
|------------------|----------------|-------|----------|----------|------------------|
| DG <sub>PP</sub> | Os031758_01 S7 | 1.861 | 1142.560 | 314.450  | LOC_Os04g33750.1 |
| DG <sub>PP</sub> | Os032446_01 S7 | 1.919 | 808.637  | 213.795  | LOC_Os01g03914.2 |
| DG <sub>PP</sub> | Os032470_01 S7 | 2.161 | 535.849  | 119.830  | LOC_Os08g04290.1 |
| DG <sub>PP</sub> | Os000365_01 S7 | 2.008 | 1585.326 | 394.109  | LOC_Os01g05970.1 |
| DG <sub>PP</sub> | Os000743_01 S7 | 2.080 | 1398.898 | 330.887  | LOC_Os04g42580.1 |
| DG <sub>PP</sub> | Os031259_01 S7 | 1.772 | 2364.796 | 692.543  | LOC_Os10g35800.1 |
| DG <sub>PP</sub> | Os008399_01 S7 | 3.680 | 2857.417 | 222.915  | LOC_Os08g40930.1 |
| DG <sub>PP</sub> | Os009134_01 S7 | 2.073 | 612.548  | 145.628  | LOC_Os08g44770.1 |
| DG <sub>PP</sub> | Os009880_01 S7 | 2.404 | 684.549  | 129.357  | LOC_Os05g08990.1 |
| DG <sub>PP</sub> | Os026332_01 S7 | 1.706 | 6813.919 | 2088.457 | LOC_Os02g50110.1 |
| DG <sub>PP</sub> | Os028171_01 S7 | 2.326 | 3137.164 | 625.513  | LOC_Os04g58220.1 |
| DG <sub>PP</sub> | Os026132_01 S7 | 2.474 | 2952.463 | 531.525  | LOC_Os03g25350.1 |
| DG <sub>PP</sub> | Os000154_01 S7 | 1.905 | 4621.487 | 1234.034 | LOC_Os03g04750.1 |
| DG <sub>PP</sub> | Os009299_01 S7 | 1.644 | 409.140  | 130.936  | LOC_Os06g39260.1 |
| DG <sub>PP</sub> | Os008633_01 S7 | 1.767 | 757.999  | 222.670  | LOC_Os04g32560.2 |
| DG <sub>PP</sub> | Os008680_01 S7 | 2.085 | 462.826  | 109.124  | LOC_Os02g18410.1 |
| DG <sub>PP</sub> | Os009416_01 S7 | 1.891 | 731.548  | 197.283  | LOC_Os03g27010.1 |
| DG <sub>PP</sub> | Os005908_01 S7 | 2.869 | 4786.331 | 655.235  | LOC_Os07g45210.1 |
| DG <sub>PP</sub> | Os037041_01 S7 | 2.842 | 1423.807 | 198.639  | -                |
| DG <sub>PP</sub> | Os036584_01 S7 | 1.650 | 2215.529 | 706.028  | LOC_Os02g21900.1 |
| DG <sub>PP</sub> | Os010947_01 S7 | 1.685 | 1252.697 | 389.605  | -                |
| DG <sub>PP</sub> | Os029316_01 S7 | 2.093 | 636.414  | 149.197  | LOC_Os11g04000.1 |
| DG <sub>PP</sub> | Os017908_01 S7 | 2.158 | 4571.905 | 1024.270 | LOC_Os03g14450.1 |
| DG <sub>PP</sub> | Os021708_01 S7 | 1.709 | 1444.173 | 441.758  | LOC_Os07g05700.1 |
| DG <sub>PP</sub> | Os052280_01 S7 | 2.297 | 4557.333 | 927.089  | LOC_Os03g29260.2 |
| DG <sub>PP</sub> | Os052328_01 S7 | 1.945 | 722.585  | 187.692  | LOC_Os03g26970.1 |
| DG <sub>PP</sub> | Os024636_01 S7 | 1.636 | 4939.654 | 1589.548 | -                |
| DG <sub>PP</sub> | Os053059_01 S7 | 1.666 | 2639.696 | 831.831  | -                |
| DG <sub>PP</sub> | Os054478_01 S7 | 1.860 | 3803.449 | 1047.675 | LOC_Os10g41410.2 |
| DG <sub>PP</sub> | Os054903_01 S7 | 1.643 | 573.583  | 183.718  | LOC_Os11g30360.1 |
| DG <sub>PP</sub> | Os054921_01 S7 | 1.829 | 547.418  | 154.036  | LOC_Os02g06650.1 |



|                  |             |    |       |           |          |                  |
|------------------|-------------|----|-------|-----------|----------|------------------|
| DG <sub>PP</sub> | Os056005_01 | S7 | 1.717 | 488.521   | 148.565  | LOC_Os01g09880.1 |
| DG <sub>PP</sub> | Os011869_01 | S7 | 1.715 | 500.169   | 152.401  | LOC_Os02g53420.1 |
| DG <sub>PP</sub> | Os012299_01 | S7 | 2.465 | 4632.289  | 839.165  | LOC_Os09g38030.1 |
| DG <sub>PP</sub> | Os020694_01 | S7 | 1.632 | 455.527   | 146.961  | LOC_Os09g33680.1 |
| DG <sub>PP</sub> | Os052004_01 | S7 | 1.910 | 5881.218  | 1565.005 | LOC_Os11g09280.2 |
| DG <sub>PP</sub> | Os024035_01 | S7 | 2.389 | 7723.156  | 1474.810 | LOC_Os10g02300.3 |
| DG <sub>PP</sub> | Os054571_01 | S7 | 3.012 | 15874.791 | 1967.984 | LOC_Os08g08960.1 |
| DG <sub>PP</sub> | Os054595_01 | S7 | 1.810 | 3024.637  | 862.511  | LOC_Os04g32950.1 |
| DG <sub>PP</sub> | Os022003_01 | S7 | 1.772 | 1377.501  | 403.343  | LOC_Os04g20220.1 |
| DG <sub>PP</sub> | Os052257_01 | S7 | 1.712 | 981.985   | 299.781  | LOC_Os03g64210.1 |
| DG <sub>PP</sub> | Os023819_01 | S7 | 2.001 | 1043.889  | 260.716  | LOC_Os08g41030.1 |
| DG <sub>PP</sub> | Os024190_01 | S7 | 1.752 | 879.355   | 261.007  | LOC_Os01g20160.1 |
| DG <sub>PP</sub> | Os054455_01 | S7 | 1.680 | 3849.198  | 1201.467 | LOC_Os08g03640.1 |
| DG <sub>PP</sub> | Os011110_01 | S7 | 2.395 | 673.905   | 128.119  | LOC_Os01g47130.1 |
| DG <sub>PP</sub> | Os017744_01 | S7 | 1.956 | 3497.847  | 901.547  | LOC_Os11g06750.1 |
| DG <sub>PP</sub> | Os018479_01 | S7 | 1.942 | 893.334   | 232.542  | LOC_Os02g55560.1 |
| DG <sub>PP</sub> | Os013238_01 | S7 | 1.698 | 772.159   | 238.008  | LOC_Os06g36700.1 |
| DG <sub>PP</sub> | Os015597_01 | S7 | 1.709 | 790.653   | 241.782  | LOC_Os07g04530.1 |
| DG <sub>PP</sub> | Os018260_01 | S7 | 2.164 | 1806.795  | 403.146  | LOC_Os06g02028.1 |
| DG <sub>PP</sub> | Os052285_01 | S7 | 1.814 | 3318.931  | 944.012  | LOC_Os03g01270.1 |
| DG <sub>PP</sub> | Os054477_01 | S7 | 2.184 | 7372.988  | 1622.860 | LOC_Os04g46200.1 |
| DG <sub>PP</sub> | Os015378_01 | S7 | 1.927 | 740.356   | 194.664  | LOC_Os12g39970.4 |
| DG <sub>PP</sub> | Os045785_01 | S7 | 1.847 | 1912.493  | 531.552  | -                |
| DG <sub>PP</sub> | Os049591_01 | S7 | 1.639 | 1272.595  | 408.601  | LOC_Os10g04500.1 |
| DG <sub>PP</sub> | Os052210_01 | S7 | 1.996 | 1549.583  | 388.424  | LOC_Os05g28280.1 |
| DG <sub>PP</sub> | Os023039_01 | S7 | 1.631 | 818.326   | 264.207  | LOC_Os07g34620.1 |
| DG <sub>PP</sub> | Os011780_01 | S7 | 1.631 | 583.379   | 188.367  | LOC_Os01g66300.1 |
| DG <sub>PP</sub> | Os023010_01 | S7 | 1.861 | 1175.687  | 323.567  | LOC_Os01g68820.1 |
| DG <sub>PP</sub> | Os050463_01 | S7 | 1.728 | 750.386   | 226.451  | -                |
| DG <sub>PP</sub> | Os023934_01 | S7 | 1.748 | 515.271   | 153.404  | LOC_Os10g30944.1 |
| DG <sub>PP</sub> | Os054482_01 | S7 | 1.639 | 2068.942  | 664.476  | LOC_Os05g49890.1 |

|                  |                |        |           |          |                  |
|------------------|----------------|--------|-----------|----------|------------------|
| DG <sub>PP</sub> | Os055618_01 S7 | 1.947  | 644.416   | 167.102  | LOC_Os02g19420.1 |
| DG <sub>PP</sub> | Os014555_01 S7 | 1.777  | 13870.638 | 4047.357 | LOC_Os06g51084.1 |
| DG <sub>PP</sub> | Os020093_01 S7 | 1.682  | 1109.592  | 345.918  | LOC_Os06g37440.1 |
| DG <sub>PP</sub> | Os023085_01 S7 | 2.020  | 2729.773  | 673.259  | LOC_Os05g34310.1 |
| DG <sub>PP</sub> | Os054387_01 S7 | 1.677  | 5089.513  | 1591.144 | LOC_Os03g38000.1 |
| DG <sub>PP</sub> | Os052277_01 S7 | 1.622  | 2505.711  | 814.000  | LOC_Os07g12090.1 |
| DG <sub>PP</sub> | Os052307_01 S7 | 2.605  | 23835.891 | 3917.146 | LOC_Os03g31750.1 |
| DG <sub>PP</sub> | Os015335_01 S7 | 1.664  | 3931.652  | 1240.456 | LOC_Os11g10050.1 |
| DG <sub>PP</sub> | Os052088_01 S7 | 2.116  | 819.660   | 189.071  | LOC_Os03g14630.1 |
| DG <sub>PP</sub> | Os023043_01 S7 | 2.097  | 1636.869  | 382.548  | LOC_Os05g06480.1 |
| DG <sub>PP</sub> | Os011849_01 S7 | 1.849  | 1130.670  | 313.852  | LOC_Os09g36230.1 |
| DG <sub>PP</sub> | Os018886_01 S7 | 3.326  | 10070.764 | 1004.306 | LOC_Os07g42490.2 |
| DG <sub>PP</sub> | Os051978_01 S7 | 3.883  | 8267.735  | 560.347  | LOC_Os03g28330.4 |
| DG <sub>PP</sub> | Os054551_01 S7 | 1.740  | 1398.465  | 418.765  | LOC_Os03g18220.1 |
| DG <sub>PP</sub> | Os055646_01 S7 | 2.346  | 2098.749  | 412.793  | LOC_Os12g29670.1 |
| DG <sub>PP</sub> | Os016661_01 S7 | 1.995  | 6347.373  | 1591.863 | LOC_Os08g25734.1 |
| DG <sub>PP</sub> | Os018162_01 S7 | 1.987  | 1738.834  | 438.601  | LOC_Os05g34670.1 |
| DG <sub>PP</sub> | Os019688_01 S7 | 2.287  | 3695.506  | 756.974  | LOC_Os04g02820.2 |
| DG <sub>PP</sub> | Os054789_01 S7 | 1.819  | 1180.806  | 334.629  | LOC_Os05g50380.1 |
| DG <sub>PP</sub> | Os049499_01 S7 | 1.736  | 2114.017  | 634.524  | LOC_Os05g27000.1 |
| DG <sub>PP</sub> | Os025211_01 S7 | 1.799  | 674.259   | 193.809  | LOC_Os11g32100.1 |
| DG <sub>PP</sub> | Os055120_01 S7 | 2.056  | 1532.371  | 368.554  | LOC_Os09g09950.1 |
| DG <sub>PP</sub> | Os054176_02 S7 | 1.774  | 2469.234  | 722.205  | -                |
| DG <sub>PP</sub> | Os042866_01 S7 | 2.607  | 2037.558  | 334.493  | LOC_Os10g05820.1 |
| DG <sub>PP</sub> | Os016442_01 S7 | 2.259  | 7831.776  | 1635.724 | LOC_Os01g44220.6 |
| DG <sub>PP</sub> | Os054538_01 S7 | 1.744  | 17492.436 | 5223.507 | LOC_Os05g33570.1 |
| DG <sub>PP</sub> | Os021202_01 S7 | 1.881  | 2449.307  | 665.076  | LOC_Os01g55540.1 |
| DG <sub>PP</sub> | Os052485_01 S7 | 2.008  | 606.205   | 150.741  | LOC_Os04g33590.1 |
| DG <sub>PP</sub> | Os034855_01 S7 | -1.887 | 153.606   | 567.969  | LOC_Os11g10330.1 |
| DG <sub>PP</sub> | Os026172_01 S7 | -1.473 | 204.111   | 566.417  | LOC_Os03g19170.1 |
| DG <sub>PP</sub> | Os000386_01 S7 | -2.010 | 259.690   | 1046.275 | LOC_Os06g08670.1 |

|                  |                |        |          |          |                  |
|------------------|----------------|--------|----------|----------|------------------|
| DG <sub>PP</sub> | Os029802_01 S7 | -2.342 | 140.735  | 713.735  | LOC_Os08g35580.1 |
| DG <sub>PP</sub> | Os029832_01 S7 | -2.690 | 145.930  | 942.020  | LOC_Os11g38160.1 |
| DG <sub>PP</sub> | Os027175_01 S7 | -1.787 | 340.751  | 1175.599 | -                |
| DG <sub>PP</sub> | Os002138_01 S7 | -1.878 | 432.997  | 1591.915 | -                |
| DG <sub>PP</sub> | Os056928_02 S7 | -2.227 | 232.888  | 1090.483 | LOC_Os09g27030.3 |
| DG <sub>PP</sub> | Os000128_01 S7 | -1.725 | 1285.015 | 4248.274 | LOC_Os06g12740.1 |
| DG <sub>PP</sub> | Os039402_01 S7 | -1.861 | 153.983  | 559.319  | -                |
| DG <sub>PP</sub> | Os056324_01 S7 | -1.974 | 164.488  | 646.390  | -                |
| DG <sub>PP</sub> | Os002472_01 S7 | -1.679 | 145.697  | 466.377  | LOC_Os06g17570.1 |
| DG <sub>PP</sub> | Os034533_01 S7 | -1.610 | 363.012  | 1107.753 | LOC_Os05g12270.1 |
| DG <sub>PP</sub> | Os027379_02 S7 | -1.506 | 396.824  | 1126.986 | -                |
| DG <sub>PP</sub> | Os057070_02 S7 | -2.633 | 400.921  | 2486.430 | -                |
| DG <sub>PP</sub> | Os057245_02 S7 | -1.890 | 199.196  | 738.112  | LOC_Os07g48010.1 |
| DG <sub>PP</sub> | Os002390_01 S7 | -1.836 | 1477.486 | 5276.541 | LOC_Os07g05360.1 |
| DG <sub>PP</sub> | Os039503_01 S7 | -1.762 | 176.634  | 599.004  | -                |
| DG <sub>PP</sub> | Os000403_01 S7 | -2.179 | 225.449  | 1021.110 | LOC_Os12g08260.2 |
| DG <sub>PP</sub> | Os004406_01 S7 | -2.335 | 272.024  | 1372.030 | LOC_Os09g28390.1 |
| DG <sub>PP</sub> | Os056942_02 S7 | -1.474 | 266.314  | 739.865  | LOC_Os09g23110.1 |
| DG <sub>PP</sub> | Os035044_01 S7 | -3.105 | 307.893  | 2649.186 | LOC_Os05g15920.1 |
| DG <sub>PP</sub> | Os028198_01 S7 | -1.559 | 173.430  | 510.931  | LOC_Os03g59010.1 |
| DG <sub>PP</sub> | Os000145_01 S7 | -1.745 | 2089.042 | 6999.976 | LOC_Os05g28950.1 |
| DG <sub>PP</sub> | Os000151_01 S7 | -1.766 | 168.742  | 574.097  | LOC_Os10g41260.1 |
| DG <sub>PP</sub> | Os000169_01 S7 | -1.596 | 700.014  | 2115.780 | LOC_Os05g40010.1 |
| DG <sub>PP</sub> | Os001657_01 S7 | -2.210 | 191.559  | 886.512  | LOC_Os07g48090.1 |
| DG <sub>PP</sub> | Os008529_01 S7 | -2.012 | 412.438  | 1663.889 | LOC_Os07g02210.2 |
| DG <sub>PP</sub> | Os027615_01 S7 | -1.756 | 2195.492 | 7418.009 | LOC_Os09g17740.1 |
| DG <sub>PP</sub> | Os009054_01 S7 | -1.564 | 139.066  | 411.215  | LOC_Os02g49790.1 |
| DG <sub>PP</sub> | Os035987_01 S7 | -1.864 | 114.923  | 418.469  | LOC_Os08g44110.1 |
| DG <sub>PP</sub> | Os030085_01 S7 | -2.221 | 163.862  | 763.750  | LOC_Os09g38670.1 |
| DG <sub>PP</sub> | Os032727_01 S7 | -2.179 | 427.708  | 1936.533 | LOC_Os08g04520.1 |
| DG <sub>PP</sub> | Os033559_01 S7 | -2.963 | 524.563  | 4090.591 | LOC_Os09g19550.1 |

|                  |             |    |        |           |           |                  |
|------------------|-------------|----|--------|-----------|-----------|------------------|
| DG <sub>PP</sub> | Os004051_01 | S7 | -1.591 | 319.594   | 962.622   | LOC_Os06g43370.1 |
| DG <sub>PP</sub> | Os005094_01 | S7 | -1.859 | 335.015   | 1214.933  | -                |
| DG <sub>PP</sub> | Os005136_01 | S7 | -2.252 | 102.922   | 490.110   | LOC_Os04g31120.6 |
| DG <sub>PP</sub> | Os005478_01 | S7 | -2.160 | 438.115   | 1958.421  | LOC_Os08g45060.1 |
| DG <sub>PP</sub> | Os009124_01 | S7 | -1.850 | 17511.060 | 63128.533 | LOC_Os12g02310.1 |
| DG <sub>PP</sub> | Os032876_01 | S7 | -1.660 | 228.073   | 720.692   | LOC_Os12g32160.1 |
| DG <sub>PP</sub> | Os004153_02 | S7 | -2.566 | 208.079   | 1231.754  | -                |
| DG <sub>PP</sub> | Os002918_01 | S7 | -2.037 | 148.564   | 609.602   | LOC_Os05g38680.1 |
| DG <sub>PP</sub> | Os000174_01 | S7 | -2.272 | 285.199   | 1377.014  | LOC_Os04g17100.1 |
| DG <sub>PP</sub> | Os010823_01 | S7 | -1.496 | 211.327   | 596.068   | LOC_Os01g29180.1 |
| DG <sub>PP</sub> | Os028119_01 | S7 | -2.658 | 122.611   | 773.971   | LOC_Os09g25910.1 |
| DG <sub>PP</sub> | Os057030_02 | S7 | -2.266 | 171.559   | 825.043   | LOC_Os07g39470.1 |
| DG <sub>PP</sub> | Os027602_01 | S7 | -2.888 | 164.756   | 1219.962  | LOC_Os01g03380.1 |
| DG <sub>PP</sub> | Os032085_01 | S7 | -1.723 | 134.858   | 445.213   | LOC_Os06g10980.1 |
| DG <sub>PP</sub> | Os008842_01 | S7 | -1.711 | 405.530   | 1327.652  | LOC_Os11g39020.1 |
| DG <sub>PP</sub> | Os033148_01 | S7 | -2.779 | 173.264   | 1189.402  | LOC_Os08g32550.1 |
| DG <sub>PP</sub> | Os010961_01 | S7 | -1.566 | 197.952   | 586.189   | -                |
| DG <sub>PP</sub> | Os037732_01 | S7 | -1.505 | 158.107   | 448.665   | LOC_Os01g10590.1 |
| DG <sub>PP</sub> | Os035826_01 | S7 | -1.961 | 441.956   | 1720.130  | -                |
| DG <sub>PP</sub> | Os009986_01 | S7 | -2.178 | 493.559   | 2234.047  | -                |
| DG <sub>PP</sub> | Os034649_01 | S7 | -1.724 | 1484.496  | 4905.739  | LOC_Os11g47980.1 |
| DG <sub>PP</sub> | Os035077_01 | S7 | -1.708 | 367.200   | 1199.870  | LOC_Os10g30690.1 |
| DG <sub>PP</sub> | Os009821_01 | S7 | -1.948 | 205.738   | 793.803   | LOC_Os03g46660.1 |
| DG <sub>PP</sub> | Os001606_01 | S7 | -1.541 | 588.794   | 1712.922  | LOC_Os06g44450.1 |
| DG <sub>PP</sub> | Os026553_01 | S7 | -1.731 | 178.422   | 592.385   | LOC_Os06g08520.1 |
| DG <sub>PP</sub> | Os009562_01 | S7 | -2.343 | 283.426   | 1437.986  | LOC_Os03g22270.1 |
| DG <sub>PP</sub> | Os026390_01 | S7 | -1.493 | 429.393   | 1209.006  | LOC_Os05g25040.2 |
| DG <sub>PP</sub> | Os002150_01 | S7 | -1.688 | 1163.173  | 3746.676  | LOC_Os03g30470.1 |
| DG <sub>PP</sub> | Os051935_01 | S7 | -3.877 | 967.786   | 14215.834 | LOC_Os01g15270.1 |
| DG <sub>PP</sub> | Os055707_01 | S7 | -1.631 | 969.843   | 3004.108  | LOC_Os04g47990.1 |
| DG <sub>PP</sub> | Os014891_01 | S7 | -1.470 | 242.121   | 670.740   | LOC_Os03g01190.1 |

|                  |             |    |        |           |           |                  |
|------------------|-------------|----|--------|-----------|-----------|------------------|
| DG <sub>PP</sub> | Os015668_01 | S7 | -1.898 | 376.161   | 1402.174  | LOC_Os01g72890.2 |
| DG <sub>PP</sub> | Os016023_01 | S7 | -1.839 | 164.977   | 590.164   | LOC_Os11g38980.4 |
| DG <sub>PP</sub> | Os020201_01 | S7 | -2.406 | 967.750   | 5129.359  | LOC_Os01g03680.1 |
| DG <sub>PP</sub> | Os025787_01 | S7 | -1.969 | 11537.561 | 45165.438 | LOC_Os12g04980.1 |
| DG <sub>PP</sub> | Os055308_01 | S7 | -2.482 | 419.223   | 2341.945  | LOC_Os07g48020.1 |
| DG <sub>PP</sub> | Os015816_01 | S7 | -2.739 | 151.286   | 1009.824  | LOC_Os12g37840.1 |
| DG <sub>PP</sub> | Os016919_01 | S7 | -1.959 | 259.870   | 1010.437  | LOC_Os02g01590.1 |
| DG <sub>PP</sub> | Os054660_01 | S7 | -1.911 | 478.643   | 1799.798  | LOC_Os04g41560.2 |
| DG <sub>PP</sub> | Os054431_01 | S7 | -1.905 | 1373.088  | 5142.146  | LOC_Os12g38064.1 |
| DG <sub>PP</sub> | Os011401_01 | S7 | -1.792 | 189.045   | 654.832   | LOC_Os10g31856.1 |
| DG <sub>PP</sub> | Os013232_01 | S7 | -1.532 | 492.533   | 1424.000  | LOC_Os03g56280.1 |
| DG <sub>PP</sub> | Os014740_01 | S7 | -2.071 | 673.780   | 2831.026  | LOC_Os07g36080.1 |
| DG <sub>PP</sub> | Os054419_01 | S7 | -1.520 | 1093.950  | 3137.910  | LOC_Os01g31690.1 |
| DG <sub>PP</sub> | Os015150_01 | S7 | -1.786 | 800.549   | 2760.007  | LOC_Os06g41010.4 |
| DG <sub>PP</sub> | Os015857_01 | S7 | -1.867 | 262.128   | 956.333   | LOC_Os02g53970.1 |
| DG <sub>PP</sub> | Os018515_01 | S7 | -1.907 | 127.200   | 476.959   | LOC_Os02g43500.2 |
| DG <sub>PP</sub> | Os045347_01 | S7 | -2.683 | 190.934   | 1225.967  | LOC_Os06g18120.1 |
| DG <sub>PP</sub> | Os046493_01 | S7 | -1.756 | 167.819   | 566.879   | LOC_Os11g39640.1 |
| DG <sub>PP</sub> | Os020036_01 | S7 | -2.404 | 122.508   | 648.210   | LOC_Os07g38130.1 |
| DG <sub>PP</sub> | Os015702_01 | S7 | -2.551 | 168.084   | 985.013   | LOC_Os01g03310.1 |
| DG <sub>PP</sub> | Os051981_01 | S7 | -1.835 | 1305.158  | 4656.545  | LOC_Os11g47809.1 |
| DG <sub>PP</sub> | Os021777_01 | S7 | -1.700 | 142.608   | 463.445   | -                |
| DG <sub>PP</sub> | Os050541_01 | S7 | -1.900 | 172.683   | 644.526   | LOC_Os12g31390.1 |
| DG <sub>PP</sub> | Os054570_01 | S7 | -1.932 | 2017.011  | 7695.336  | LOC_Os12g36880.1 |
| DG <sub>PP</sub> | Os020983_01 | S7 | -1.810 | 173.178   | 607.339   | LOC_Os06g46410.1 |
| DG <sub>PP</sub> | Os021367_01 | S7 | -1.487 | 477.492   | 1338.689  | LOC_Os01g01410.1 |
| DG <sub>PP</sub> | Os051998_01 | S7 | -1.549 | 809.017   | 2367.138  | LOC_Os12g08770.1 |
| DG <sub>PP</sub> | Os025786_01 | S7 | -1.714 | 302.680   | 992.978   | -                |
| DG <sub>PP</sub> | Os054518_01 | S7 | -1.605 | 547.808   | 1666.811  | LOC_Os04g16680.1 |
| DG <sub>PP</sub> | Os011927_01 | S7 | -1.790 | 143.856   | 497.378   | LOC_Os06g07780.1 |
| DG <sub>PP</sub> | Os013388_01 | S7 | -1.693 | 322.675   | 1043.068  | LOC_Os01g07120.2 |

|                  |             |    |        |          |           |                  |
|------------------|-------------|----|--------|----------|-----------|------------------|
| DG <sub>PP</sub> | Os045565_01 | S7 | -2.538 | 169.472  | 984.039   | LOC_Os10g09630.1 |
| DG <sub>PP</sub> | Os021035_01 | S7 | -2.986 | 1394.118 | 11041.468 | -                |
| DG <sub>PP</sub> | Os052461_01 | S7 | -1.484 | 1564.790 | 4378.123  | LOC_Os04g33110.1 |
| DG <sub>PP</sub> | Os052819_01 | S7 | -3.519 | 162.315  | 1860.656  | -                |
| DG <sub>PP</sub> | Os054659_01 | S7 | -1.772 | 318.948  | 1089.381  | LOC_Os01g07760.2 |
| DG <sub>PP</sub> | Os055763_01 | S7 | -1.983 | 170.854  | 675.226   | -                |
| DG <sub>PP</sub> | Os044467_01 | S7 | -1.636 | 211.940  | 658.508   | LOC_Os03g63310.1 |
| DG <sub>PP</sub> | Os044853_01 | S7 | -2.743 | 216.515  | 1449.789  | LOC_Os02g13620.1 |
| DG <sub>PP</sub> | Os011598_01 | S7 | -1.530 | 178.186  | 514.405   | LOC_Os12g42850.1 |
| DG <sub>PP</sub> | Os012781_01 | S7 | -3.110 | 140.344  | 1211.977  | LOC_Os11g25780.1 |
| DG <sub>PP</sub> | Os054436_01 | S7 | -2.896 | 489.141  | 3639.737  | LOC_Os09g39780.2 |
| DG <sub>PP</sub> | Os055567_01 | S7 | -1.942 | 155.814  | 598.519   | LOC_Os07g46330.1 |
| DG <sub>PP</sub> | Os011851_01 | S7 | -1.597 | 554.291  | 1677.178  | LOC_Os05g04630.6 |
| DG <sub>PP</sub> | Os021495_01 | S7 | -2.219 | 168.865  | 786.435   | LOC_Os12g38640.1 |
| DG <sub>PP</sub> | Os016305_01 | S7 | -1.468 | 112.927  | 312.503   | LOC_Os05g46460.1 |
| DG <sub>PP</sub> | Os017058_01 | S7 | -1.515 | 203.688  | 582.149   | LOC_Os05g33940.1 |
| DG <sub>PP</sub> | Os021643_01 | S7 | -2.268 | 133.696  | 643.916   | LOC_Os01g62610.1 |
| DG <sub>PP</sub> | Os012563_01 | S7 | -1.573 | 253.852  | 755.432   | LOC_Os12g12850.2 |
| DG <sub>PP</sub> | Os013295_01 | S7 | -2.127 | 449.358  | 1962.899  | -                |
| DG <sub>PP</sub> | Os013733_01 | S7 | -1.548 | 132.472  | 387.342   | LOC_Os05g04620.1 |
| DG <sub>PP</sub> | Os019287_01 | S7 | -1.792 | 215.213  | 745.072   | LOC_Os01g65080.3 |
| DG <sub>PP</sub> | Os020390_01 | S7 | -2.884 | 377.694  | 2787.367  | LOC_Os03g58070.1 |
| DG <sub>PP</sub> | Os020420_01 | S7 | -1.475 | 182.032  | 506.048   | LOC_Os06g41810.1 |
| DG <sub>PP</sub> | Os054377_01 | S7 | -1.954 | 276.054  | 1069.773  | LOC_Os05g31140.1 |
| DG <sub>PP</sub> | Os054699_01 | S7 | -2.752 | 465.775  | 3137.988  | -                |
| DG <sub>PP</sub> | Os011722_01 | S7 | -2.021 | 265.456  | 1077.294  | LOC_Os03g03390.1 |
| DG <sub>PP</sub> | Os013951_01 | S7 | -1.585 | 180.043  | 540.053   | LOC_Os03g26460.2 |
| DG <sub>PP</sub> | Os051962_01 | S7 | -1.926 | 429.622  | 1632.141  | LOC_Os02g26700.1 |
| DG <sub>PP</sub> | Os011125_01 | S7 | -2.009 | 360.254  | 1450.355  | LOC_Os08g40680.1 |
| DG <sub>PP</sub> | Os015666_01 | S7 | -1.713 | 1172.209 | 3842.047  | LOC_Os03g10090.1 |
| DG <sub>PP</sub> | Os051968_01 | S7 | -1.801 | 289.607  | 1009.189  | LOC_Os03g08500.1 |

|                  |             |    |        |         |          |                  |
|------------------|-------------|----|--------|---------|----------|------------------|
| DG <sub>PP</sub> | Os051974_01 | S7 | -3.125 | 131.774 | 1149.933 | LOC_Os01g03360.1 |
| DG <sub>PP</sub> | Os052361_01 | S7 | -1.652 | 166.226 | 522.435  | LOC_Os04g43200.1 |
| DG <sub>PP</sub> | Os015784_01 | S7 | -1.928 | 241.219 | 917.743  | LOC_Os02g06910.1 |
| DG <sub>PP</sub> | Os015790_01 | S7 | -1.960 | 626.488 | 2437.220 | -                |
| DG <sub>PP</sub> | Os016116_01 | S7 | -3.336 | 160.642 | 1621.964 | LOC_Os04g53450.1 |
| DG <sub>PP</sub> | Os019891_01 | S7 | -2.320 | 113.123 | 564.952  | LOC_Os08g43334.1 |
| DG <sub>PP</sub> | Os021453_01 | S7 | -1.834 | 324.572 | 1157.063 | LOC_Os02g12760.1 |
| DG <sub>PP</sub> | Os022154_01 | S7 | -1.718 | 131.648 | 433.216  | LOC_Os08g42100.1 |
| DG <sub>PP</sub> | Os011973_01 | S7 | -2.203 | 145.584 | 670.513  | LOC_Os09g25760.1 |
| DG <sub>PP</sub> | Os012756_01 | S7 | -1.601 | 989.865 | 3002.923 | LOC_Os02g43930.1 |
| DG <sub>PP</sub> | Os013125_01 | S7 | -1.487 | 156.958 | 440.014  | LOC_Os03g63020.3 |
| DG <sub>PP</sub> | Os014282_01 | S7 | -2.413 | 106.665 | 568.009  | LOC_Os10g40030.8 |
| DG <sub>PP</sub> | Os054429_01 | S7 | -2.075 | 197.776 | 833.606  | LOC_Os12g38051.1 |
| DG <sub>PP</sub> | Os053553_01 | S7 | -1.573 | 139.098 | 413.768  | LOC_Os01g54880.1 |
| DG <sub>PP</sub> | Os046888_01 | S7 | -1.985 | 761.626 | 3015.609 | LOC_Os03g25460.1 |
| DG <sub>PP</sub> | Os014092_01 | S7 | -1.543 | 243.671 | 709.902  | LOC_Os11g08300.1 |
| DG <sub>PP</sub> | Os020769_01 | S7 | -1.959 | 404.228 | 1571.992 | LOC_Os03g46060.1 |
| DG <sub>PP</sub> | Os023328_01 | S7 | -1.887 | 276.153 | 1021.586 | LOC_Os11g18830.1 |
| DG <sub>PP</sub> | Os052906_01 | S7 | -1.500 | 191.979 | 543.014  | LOC_Os09g21740.1 |
| DG <sub>PP</sub> | Os054745_01 | S7 | -1.758 | 862.457 | 2917.838 | LOC_Os07g37030.1 |
| DG <sub>PP</sub> | Os011394_01 | S7 | -1.852 | 210.180 | 758.884  | LOC_Os12g34110.1 |
| DG <sub>PP</sub> | Os013568_01 | S7 | -1.818 | 184.244 | 649.480  | LOC_Os08g40150.2 |
| DG <sub>PP</sub> | Os024604_01 | S7 | -1.489 | 117.756 | 330.583  | LOC_Os01g14530.1 |
| DG <sub>PP</sub> | Os051973_01 | S7 | -1.719 | 349.470 | 1150.307 | LOC_Os01g45274.1 |
| DG <sub>PP</sub> | Os053068_01 | S7 | -2.182 | 100.813 | 457.490  | LOC_Os07g45310.1 |
| DG <sub>PP</sub> | Os054487_01 | S7 | -1.535 | 391.678 | 1134.959 | LOC_Os06g04020.1 |
| DG <sub>PP</sub> | Os050925_01 | S7 | -3.473 | 217.502 | 2414.344 | LOC_Os01g61840.1 |
| DG <sub>PP</sub> | Os054634_01 | S7 | -1.518 | 528.992 | 1514.717 | LOC_Os10g32810.1 |
| DG <sub>PP</sub> | Os014654_01 | S7 | -1.802 | 252.109 | 879.149  | LOC_Os10g30790.2 |
| DG <sub>PP</sub> | Os016309_01 | S7 | -1.734 | 141.415 | 470.462  | LOC_Os10g28360.1 |
| DG <sub>PP</sub> | Os048781_01 | S7 | -1.638 | 134.579 | 418.796  | -                |

|                  |             |    |        |          |           |                  |
|------------------|-------------|----|--------|----------|-----------|------------------|
| DG <sub>PP</sub> | Os024527_01 | S7 | -2.083 | 217.706  | 922.243   | LOC_Os03g18230.1 |
| DG <sub>PP</sub> | Os024593_01 | S7 | -1.468 | 233.396  | 645.688   | LOC_Os05g11250.1 |
| DG <sub>PP</sub> | Os052641_01 | S7 | -1.610 | 393.075  | 1200.136  | -                |
| DG <sub>PP</sub> | Os011415_01 | S7 | -1.630 | 1717.589 | 5317.170  | LOC_Os12g10604.1 |
| DG <sub>PP</sub> | Os022300_01 | S7 | -2.181 | 295.846  | 1341.540  | -                |
| DG <sub>PP</sub> | Os052111_01 | S7 | -2.557 | 305.276  | 1795.964  | LOC_Os09g31482.3 |
| DG <sub>PP</sub> | Os054673_01 | S7 | -1.548 | 448.826  | 1312.729  | LOC_Os03g55540.1 |
| DG <sub>PP</sub> | Os054727_01 | S7 | -1.572 | 174.678  | 519.191   | LOC_Os01g61670.1 |
| DG <sub>PP</sub> | Os055074_01 | S7 | -2.010 | 582.430  | 2345.201  | LOC_Os07g43770.1 |
| DG <sub>PP</sub> | Os012472_01 | S7 | -1.640 | 292.271  | 911.020   | LOC_Os02g35190.2 |
| DG <sub>PP</sub> | Os013643_01 | S7 | -1.710 | 215.907  | 706.440   | LOC_Os10g36550.3 |
| DG <sub>PP</sub> | Os017653_01 | S7 | -2.493 | 172.363  | 970.575   | LOC_Os02g33330.1 |
| DG <sub>PP</sub> | Os021445_01 | S7 | -1.823 | 558.032  | 1974.022  | LOC_Os08g06110.1 |
| DG <sub>PP</sub> | Os051250_01 | S7 | -2.676 | 192.467  | 1230.215  | -                |
| DG <sub>PP</sub> | Os024774_01 | S7 | -1.583 | 676.454  | 2025.993  | LOC_Os02g10390.1 |
| DG <sub>PP</sub> | Os052782_02 | S7 | -4.468 | 283.893  | 6281.370  | -                |
| DG <sub>PP</sub> | Os016085_01 | S7 | -1.772 | 766.024  | 2615.428  | LOC_Os09g12150.1 |
| DG <sub>PP</sub> | Os017150_01 | S7 | -1.516 | 396.178  | 1132.824  | LOC_Os08g08190.1 |
| DG <sub>PP</sub> | Os045461_01 | S7 | -1.734 | 689.915  | 2295.518  | LOC_Os05g48630.2 |
| DG <sub>PP</sub> | Os023903_01 | S7 | -2.817 | 143.076  | 1008.115  | LOC_Os03g08050.3 |
| DG <sub>PP</sub> | Os054562_01 | S7 | -2.766 | 251.857  | 1713.545  | LOC_Os01g21250.1 |
| DG <sub>PP</sub> | Os011578_01 | S7 | -2.322 | 391.761  | 1958.851  | LOC_Os03g38730.1 |
| DG <sub>PP</sub> | Os011930_01 | S7 | -1.871 | 182.667  | 668.374   | LOC_Os08g38460.1 |
| DG <sub>PP</sub> | Os017238_01 | S7 | -1.572 | 514.797  | 1530.288  | LOC_Os07g01820.1 |
| DG <sub>PP</sub> | Os023619_01 | S7 | -1.781 | 355.554  | 1222.049  | -                |
| DG <sub>PP</sub> | Os054609_01 | S7 | -1.828 | 207.360  | 736.038   | LOC_Os08g03410.1 |
| DG <sub>PP</sub> | Os054627_01 | S7 | -2.826 | 193.034  | 1368.354  | LOC_Os01g73940.1 |
| DG <sub>PP</sub> | Os013504_01 | S7 | -1.554 | 154.261  | 453.000   | LOC_Os03g15020.1 |
| DG <sub>PP</sub> | Os054362_01 | S7 | -1.579 | 9415.547 | 28134.379 | LOC_Os05g26350.1 |
| DG <sub>PP</sub> | Os053316_01 | S7 | -1.726 | 173.361  | 573.519   | LOC_Os01g71690.1 |
| DG <sub>PP</sub> | Os012910_01 | S7 | -2.630 | 121.889  | 754.269   | LOC_Os12g38170.1 |



|                  |             |    |        |         |          |                  |
|------------------|-------------|----|--------|---------|----------|------------------|
| DG <sub>PP</sub> | Os013659_01 | S7 | -1.556 | 218.648 | 643.116  | LOC_Os03g60080.1 |
| DG <sub>PP</sub> | Os015152_01 | S7 | -1.933 | 219.736 | 838.853  | LOC_Os05g49300.1 |
| DG <sub>PP</sub> | Os017710_01 | S7 | -1.476 | 153.621 | 427.427  | LOC_Os09g31478.2 |
| DG <sub>PP</sub> | Os019636_01 | S7 | -1.490 | 203.166 | 570.622  | -                |
| DG <sub>PP</sub> | Os021097_01 | S7 | -1.829 | 388.306 | 1379.455 | LOC_Os04g24140.1 |
| DG <sub>PP</sub> | Os055414_01 | S7 | -1.816 | 250.739 | 882.966  | LOC_Os11g33120.1 |
| DG <sub>PP</sub> | Os042689_01 | S7 | -1.794 | 111.095 | 385.127  | -                |
| DG <sub>PP</sub> | Os013222_01 | S7 | -1.483 | 181.411 | 507.109  | LOC_Os07g01550.1 |
| DG <sub>PP</sub> | Os013619_01 | S7 | -1.793 | 359.147 | 1244.464 | -                |
| DG <sub>PP</sub> | Os016878_01 | S7 | -1.560 | 234.280 | 690.912  | LOC_Os02g18450.1 |
| DG <sub>PP</sub> | Os047467_01 | S7 | -2.484 | 705.619 | 3946.266 | LOC_Os08g05160.1 |
| DG <sub>PP</sub> | Os047818_01 | S7 | -1.647 | 181.091 | 566.973  | -                |
| DG <sub>PP</sub> | Os052293_01 | S7 | -1.789 | 212.419 | 734.144  | LOC_Os08g36320.2 |
| DG <sub>PP</sub> | Os023508_01 | S7 | -2.198 | 237.831 | 1091.514 | LOC_Os08g04430.1 |
| DG <sub>PP</sub> | Os054485_01 | S7 | -1.687 | 245.701 | 790.930  | LOC_Os10g39130.1 |
| DG <sub>PP</sub> | Os054491_01 | S7 | -1.481 | 338.926 | 946.202  | -                |
| DG <sub>PP</sub> | Os013426_01 | S7 | -1.467 | 182.131 | 503.542  | LOC_Os12g35630.1 |
| DG <sub>PP</sub> | Os013775_01 | S7 | -1.549 | 248.288 | 726.655  | LOC_Os01g48930.1 |
| DG <sub>PP</sub> | Os014981_01 | S7 | -1.563 | 328.788 | 971.210  | -                |
| DG <sub>PP</sub> | Os018056_01 | S7 | -3.242 | 138.569 | 1310.740 | LOC_Os05g15880.1 |
| DG <sub>PP</sub> | Os019942_01 | S7 | -1.465 | 182.778 | 504.580  | LOC_Os01g73970.1 |
| DG <sub>PP</sub> | Os054578_01 | S7 | -2.766 | 414.139 | 2816.096 | LOC_Os02g39630.2 |
| DG <sub>PP</sub> | Os054602_01 | S7 | -3.160 | 118.163 | 1055.918 | LOC_Os08g35190.2 |
| DG <sub>PP</sub> | Os012723_01 | S7 | -2.101 | 645.951 | 2771.671 | LOC_Os03g03910.1 |
| DG <sub>PP</sub> | Os013145_01 | S7 | -1.527 | 286.292 | 825.036  | LOC_Os02g38820.1 |
| DG <sub>PP</sub> | Os014604_01 | S7 | -2.797 | 133.689 | 929.367  | LOC_Os01g04710.1 |
| DG <sub>PP</sub> | Os017090_01 | S7 | -1.888 | 157.001 | 581.098  | LOC_Os02g47150.1 |
| DG <sub>PP</sub> | Os017108_01 | S7 | -1.561 | 89.530  | 264.138  | LOC_Os01g60110.1 |
| DG <sub>PP</sub> | Os021980_01 | S7 | -1.659 | 568.180 | 1794.472 | LOC_Os05g03760.1 |
| DG <sub>PP</sub> | Os022309_01 | S7 | -1.942 | 191.749 | 736.577  | LOC_Os05g10670.1 |
| DG <sub>PP</sub> | Os047586_01 | S7 | -1.638 | 149.686 | 465.784  | LOC_Os11g24230.1 |

|                  |             |    |        |          |          |                  |
|------------------|-------------|----|--------|----------|----------|------------------|
| DG <sub>PP</sub> | Os019241_01 | S7 | -1.596 | 162.497  | 491.238  | LOC_Os01g09620.2 |
| DG <sub>PP</sub> | Os018245_01 | S7 | -1.695 | 169.945  | 550.113  | LOC_Os12g36850.2 |
| DG <sub>PP</sub> | Os046577_01 | S7 | -2.255 | 1646.116 | 7858.466 | -                |
| DG <sub>PP</sub> | Os054841_01 | S7 | -1.490 | 98.316   | 276.195  | LOC_Os10g15240.1 |
| DG <sub>PP</sub> | Os015075_01 | S7 | -2.273 | 101.190  | 489.246  | LOC_Os04g46670.1 |
| DG <sub>PP</sub> | Os020392_01 | S7 | -2.389 | 355.978  | 1864.301 | LOC_Os03g15050.2 |
| DG <sub>PP</sub> | Os021497_01 | S7 | -1.804 | 262.624  | 916.733  | LOC_Os06g40080.1 |
| DG <sub>PP</sub> | Os054725_01 | S7 | -1.662 | 426.495  | 1349.527 | LOC_Os07g11310.1 |
| DG <sub>PP</sub> | Os014320_01 | S7 | -1.487 | 570.295  | 1599.001 | LOC_Os03g17570.3 |

| DG category       | GeneID      | Tissue | log2(L/N) | log2(L/P) | N flag | N intens | L lag | L intens | P flag | P intens | TIGR5 ID         |
|-------------------|-------------|--------|-----------|-----------|--------|----------|-------|----------|--------|----------|------------------|
| DG <sub>HPU</sub> | Os000012_01 | S1     | 0.000     | 1.206     | P      | 212.478  | P     | 389.260  | P      | 168.712  | LOC_Os02g45180.1 |
| DG <sub>HPU</sub> | Os000070_01 | S1     | 1.090     | 0.000     | P      | 531.699  | P     | 1131.719 | P      | 1171.645 | LOC_Os04g33750.1 |
| DG <sub>HPU</sub> | Os000102_01 | S1     | 0.000     | 0.908     | P      | 369.136  | P     | 403.302  | P      | 214.914  | LOC_Os03g05520.1 |
| DG <sub>HPU</sub> | Os000189_01 | S1     | 1.176     | 0.000     | P      | 639.947  | P     | 1445.913 | P      | 1267.844 | LOC_Os12g05430.1 |
| DG <sub>HPU</sub> | Os000206_02 | S1     | 0.000     | 0.786     | P      | 367.522  | P     | 352.187  | P      | 204.265  | -                |
| DG <sub>HPU</sub> | Os000230_01 | S1     | 0.000     | 0.820     | P      | 2051.740 | P     | 1918.516 | P      | 1086.768 | -                |
| DG <sub>HPU</sub> | Os000282_01 | S1     | 0.000     | 0.788     | P      | 5842.859 | P     | 4795.546 | P      | 2777.642 | LOC_Os03g60100.1 |
| DG <sub>HPU</sub> | Os000365_01 | S1     | 0.000     | 0.924     | P      | 1451.266 | P     | 1611.526 | P      | 849.118  | LOC_Os01g05970.1 |
| DG <sub>HPU</sub> | Os000411_01 | S1     | 0.000     | 0.907     | P      | 1005.735 | P     | 1424.082 | P      | 759.413  | LOC_Os01g05970.1 |
| DG <sub>HPU</sub> | Os000618_01 | S1     | 1.067     | 0.000     | P      | 290.287  | P     | 607.979  | P      | 535.543  | LOC_Os05g45730.1 |
| DG <sub>HPU</sub> | Os000849_01 | S1     | 0.000     | 1.049     | P      | 203.757  | P     | 202.010  | P      | 97.645   | LOC_Os09g34850.3 |
| DG <sub>HPU</sub> | Os000941_01 | S1     | 0.000     | 0.843     | P      | 353.221  | P     | 293.404  | P      | 163.522  | LOC_Os03g43390.2 |
| DG <sub>HPU</sub> | Os001096_01 | S1     | 1.090     | 0.000     | P      | 200.089  | P     | 425.837  | P      | 405.266  | LOC_Os12g06670.1 |
| DG <sub>HPU</sub> | Os001104_01 | S1     | 0.000     | 0.865     | P      | 260.528  | P     | 285.710  | P      | 156.843  | LOC_Os01g46700.1 |
| DG <sub>HPU</sub> | Os001540_01 | S1     | 0.000     | 0.856     | P      | 411.077  | P     | 558.161  | P      | 308.280  | LOC_Os09g32532.2 |
| DG <sub>HPU</sub> | Os001842_01 | S1     | 1.458     | 0.000     | P      | 688.677  | P     | 1892.617 | P      | 1404.539 | -                |
| DG <sub>HPU</sub> | Os001890_01 | S1     | 1.052     | 0.000     | P      | 912.295  | P     | 1891.077 | P      | 2030.809 | LOC_Os04g47690.1 |
| DG <sub>HPU</sub> | Os001927_01 | S1     | -0.949    | 0.000     | P      | 369.595  | P     | 191.387  | P      | 210.375  | LOC_Os04g41640.1 |
| DG <sub>HPU</sub> | Os001934_01 | S1     | 10.000    | 1.198     | A      | 66.990   | P     | 1443.393 | P      | 629.167  | -                |
| DG <sub>HPU</sub> | Os002390_01 | S1     | -1.045    | 0.000     | P      | 9139.813 | P     | 4428.212 | P      | 5421.586 | LOC_Os07g05360.1 |

|                   |             |    |        |        |   |          |   |          |   |           |                  |
|-------------------|-------------|----|--------|--------|---|----------|---|----------|---|-----------|------------------|
| DG <sub>HPU</sub> | Os003257_01 | S1 | 1.225  | 0.000  | P | 101.690  | P | 237.635  | P | 210.770   | -                |
| DG <sub>HPU</sub> | Os003627_01 | S1 | 0.000  | 1.029  | P | 809.352  | P | 1002.355 | P | 491.129   | LOC_Os01g53070.1 |
| DG <sub>HPU</sub> | Os005094_01 | S1 | 0.000  | 1.064  | P | 231.912  | P | 346.970  | P | 165.978   | -                |
| DG <sub>HPU</sub> | Os005192_01 | S1 | 0.000  | 0.851  | P | 374.779  | P | 363.463  | P | 201.455   | -                |
| DG <sub>HPU</sub> | Os005941_01 | S1 | -1.211 | 0.000  | P | 6052.839 | P | 2615.074 | P | 3065.435  | LOC_Os09g31300.1 |
| DG <sub>HPU</sub> | Os005953_01 | S1 | -1.224 | 0.000  | P | 7388.129 | P | 3162.921 | P | 3893.111  | LOC_Os06g30020.1 |
| DG <sub>HPU</sub> | Os005956_01 | S1 | -1.280 | 0.000  | P | 4321.024 | P | 1778.774 | P | 2284.113  | LOC_Os03g18710.1 |
| DG <sub>HPU</sub> | Os005967_01 | S1 | -0.955 | 0.000  | P | 7556.380 | P | 3899.198 | P | 5372.963  | LOC_Os07g08360.1 |
| DG <sub>HPU</sub> | Os005968_01 | S1 | -1.112 | 0.000  | P | 2330.198 | P | 1077.722 | P | 1183.181  | LOC_Os06g03750.1 |
| DG <sub>HPU</sub> | Os006571_01 | S1 | 1.344  | 0.000  | P | 1897.148 | P | 4814.787 | P | 2969.595  | LOC_Os05g01350.1 |
| DG <sub>HPU</sub> | Os007934_01 | S1 | -0.916 | 0.000  | P | 749.668  | P | 397.344  | P | 390.733   | -                |
| DG <sub>HPU</sub> | Os008188_01 | S1 | 0.000  | 0.913  | P | 179.118  | P | 217.201  | P | 115.311   | LOC_Os08g37250.1 |
| DG <sub>HPU</sub> | Os008199_01 | S1 | -1.038 | 0.000  | P | 1791.806 | P | 872.442  | P | 841.524   | LOC_Os11g44990.1 |
| DG <sub>HPU</sub> | Os008420_01 | S1 | -0.966 | 0.000  | P | 540.110  | P | 276.577  | P | 293.032   | LOC_Os04g37619.1 |
| DG <sub>HPU</sub> | Os008529_01 | S1 | 1.050  | 0.000  | P | 424.146  | P | 878.421  | P | 738.679   | LOC_Os07g02210.2 |
| DG <sub>HPU</sub> | Os008704_01 | S1 | 0.000  | 0.962  | P | 481.960  | P | 534.872  | P | 274.664   | -                |
| DG <sub>HPU</sub> | Os008724_01 | S1 | 0.000  | -0.726 | P | 316.936  | P | 293.019  | P | 484.639   | LOC_Os05g49970.2 |
| DG <sub>HPU</sub> | Os008778_01 | S1 | -1.063 | 0.000  | P | 8660.005 | P | 4145.750 | P | 4254.268  | LOC_Os05g31000.1 |
| DG <sub>HPU</sub> | Os008799_01 | S1 | 0.000  | 0.876  | P | 459.750  | P | 404.871  | P | 220.628   | LOC_Os07g16950.5 |
| DG <sub>HPU</sub> | Os008824_01 | S1 | 0.000  | 0.866  | P | 541.545  | P | 691.350  | P | 379.299   | -                |
| DG <sub>HPU</sub> | Os009036_01 | S1 | -0.901 | 0.000  | P | 6155.835 | P | 3297.667 | P | 3281.993  | LOC_Os12g30540.1 |
| DG <sub>HPU</sub> | Os009044_01 | S1 | 1.444  | 0.000  | P | 296.144  | P | 805.906  | P | 475.773   | -                |
| DG <sub>HPU</sub> | Os009065_01 | S1 | 0.000  | 0.827  | P | 275.207  | P | 285.243  | P | 160.779   | LOC_Os10g05680.1 |
| DG <sub>HPU</sub> | Os009088_01 | S1 | -1.045 | 0.000  | P | 1424.774 | P | 690.477  | P | 847.495   | LOC_Os05g12400.1 |
| DG <sub>HPU</sub> | Os009688_01 | S1 | 10.000 | -0.946 | A | 70.486   | P | 9522.597 | P | 18351.131 | LOC_Os01g55650.1 |
| DG <sub>HPU</sub> | Os009739_01 | S1 | 0.000  | 0.918  | P | 315.321  | P | 579.669  | P | 306.756   | LOC_Os01g01650.1 |
| DG <sub>HPU</sub> | Os009951_01 | S1 | 0.000  | 0.810  | P | 342.003  | P | 343.553  | P | 195.993   | LOC_Os03g06950.1 |
| DG <sub>HPU</sub> | Os009997_01 | S1 | 1.048  | 1.041  | P | 153.771  | P | 317.954  | P | 154.570   | LOC_Os12g26220.1 |
| DG <sub>HPU</sub> | Os010115_01 | S1 | -0.885 | 0.000  | P | 4007.438 | P | 2170.135 | P | 1902.452  | LOC_Os09g36040.1 |
| DG <sub>HPU</sub> | Os010136_01 | S1 | -1.157 | 0.000  | P | 681.602  | P | 305.582  | P | 392.250   | LOC_Os11g06730.1 |
| DG <sub>HPU</sub> | Os010157_01 | S1 | 10.000 | 1.130  | A | 49.842   | P | 322.537  | P | 147.402   | LOC_Os01g26070.1 |

|                   |             |    |        |        |   |          |   |          |   |           |                  |
|-------------------|-------------|----|--------|--------|---|----------|---|----------|---|-----------|------------------|
| DG <sub>HPU</sub> | Os010211_01 | S1 | 1.179  | 0.801  | P | 249.817  | P | 565.455  | P | 324.442   | LOC_Os10g41800.1 |
| DG <sub>HPU</sub> | Os010232_01 | S1 | -1.079 | 0.000  | P | 2442.499 | P | 1156.511 | P | 1796.324  | LOC_Os07g01630.1 |
| DG <sub>HPU</sub> | Os010262_01 | S1 | 1.329  | 0.000  | P | 102.248  | P | 256.852  | P | 197.172   | LOC_Os07g45790.1 |
| DG <sub>HPU</sub> | Os010785_01 | S1 | 0.000  | 1.035  | P | 613.483  | P | 630.910  | P | 307.937   | LOC_Os05g35540.1 |
| DG <sub>HPU</sub> | Os010912_01 | S1 | -0.952 | 0.000  | P | 710.929  | P | 367.574  | P | 429.487   | LOC_Os06g23870.1 |
| DG <sub>HPU</sub> | Os010932_01 | S1 | 0.000  | 0.872  | P | 239.752  | P | 258.884  | P | 141.437   | -                |
| DG <sub>HPU</sub> | Os010947_01 | S1 | -0.922 | 0.000  | P | 1248.435 | P | 658.960  | P | 665.466   | -                |
| DG <sub>HPU</sub> | Os011020_01 | S1 | -1.020 | 0.000  | P | 548.756  | P | 270.610  | P | 252.534   | LOC_Os08g39090.1 |
| DG <sub>HPU</sub> | Os011327_01 | S1 | -0.910 | -1.318 | P | 653.451  | P | 347.861  | P | 867.080   | LOC_Os02g31030.1 |
| DG <sub>HPU</sub> | Os011362_01 | S1 | 1.149  | 0.000  | P | 352.192  | P | 781.014  | P | 734.236   | -                |
| DG <sub>HPU</sub> | Os011415_01 | S1 | 1.348  | 0.000  | P | 1751.895 | P | 4460.180 | P | 3247.262  | LOC_Os12g10604.1 |
| DG <sub>HPU</sub> | Os011527_01 | S1 | 1.170  | 0.000  | P | 102.766  | P | 231.287  | P | 178.313   | LOC_Os04g42444.1 |
| DG <sub>HPU</sub> | Os011633_01 | S1 | 0.000  | -0.700 | P | 526.827  | P | 663.158  | P | 1077.243  | LOC_Os12g15470.2 |
| DG <sub>HPU</sub> | Os012411_01 | S1 | 1.027  | 0.000  | P | 155.831  | P | 317.552  | P | 227.710   | LOC_Os01g65250.1 |
| DG <sub>HPU</sub> | Os012627_01 | S1 | 0.000  | -0.660 | P | 155.604  | P | 192.273  | P | 303.892   | LOC_Os06g08720.2 |
| DG <sub>HPU</sub> | Os012753_01 | S1 | 0.000  | -0.754 | P | 9995.127 | P | 7417.512 | P | 12507.832 | -                |
| DG <sub>HPU</sub> | Os012771_01 | S1 | 1.021  | 0.000  | P | 651.004  | P | 1321.400 | P | 1092.320  | LOC_Os05g46220.1 |
| DG <sub>HPU</sub> | Os012974_01 | S1 | 0.000  | -0.880 | P | 205.374  | P | 192.031  | P | 353.340   | LOC_Os09g31430.1 |
| DG <sub>HPU</sub> | Os013133_01 | S1 | -1.121 | 0.000  | P | 5656.898 | P | 2601.248 | P | 3039.598  | LOC_Os03g02560.1 |
| DG <sub>HPU</sub> | Os013246_01 | S1 | -0.957 | 0.000  | P | 413.848  | P | 213.160  | P | 259.840   | LOC_Os11g11000.2 |
| DG <sub>HPU</sub> | Os013247_01 | S1 | 1.059  | 0.000  | P | 91.028   | P | 189.672  | P | 163.591   | LOC_Os03g58720.1 |
| DG <sub>HPU</sub> | Os013495_01 | S1 | 0.000  | -0.657 | P | 320.273  | P | 208.308  | P | 328.513   | LOC_Os08g01390.1 |
| DG <sub>HPU</sub> | Os014099_01 | S1 | 1.066  | 0.000  | P | 115.661  | P | 242.084  | P | 149.967   | LOC_Os12g07120.1 |
| DG <sub>HPU</sub> | Os014111_01 | S1 | 1.109  | 0.000  | P | 102.639  | P | 221.364  | P | 183.277   | LOC_Os03g40110.1 |
| DG <sub>HPU</sub> | Os014422_01 | S1 | -0.908 | -0.786 | P | 417.096  | P | 222.214  | P | 383.154   | -                |
| DG <sub>HPU</sub> | Os014458_01 | S1 | 1.175  | 0.000  | P | 86.976   | P | 196.444  | P | 180.871   | -                |
| DG <sub>HPU</sub> | Os014900_01 | S1 | 1.096  | 1.172  | P | 552.480  | P | 1181.056 | P | 524.150   | LOC_Os04g40700.3 |
| DG <sub>HPU</sub> | Os015538_01 | S1 | -0.897 | 0.000  | P | 329.244  | P | 176.778  | P | 186.489   | LOC_Os10g09090.1 |
| DG <sub>HPU</sub> | Os015663_01 | S1 | 1.123  | 0.000  | P | 104.193  | P | 226.986  | P | 160.262   | LOC_Os11g02379.1 |
| DG <sub>HPU</sub> | Os015702_01 | S1 | 0.000  | -0.760 | P | 218.465  | P | 188.230  | P | 318.693   | LOC_Os01g03310.1 |
| DG <sub>HPU</sub> | Os016085_01 | S1 | 1.155  | 1.395  | P | 538.404  | P | 1198.685 | P | 455.750   | LOC_Os09g12150.1 |

|                   |             |    |        |        |   |           |   |          |   |          |                  |
|-------------------|-------------|----|--------|--------|---|-----------|---|----------|---|----------|------------------|
| DG <sub>HPU</sub> | Os016154_01 | S1 | 1.288  | 0.000  | P | 86.404    | P | 210.936  | P | 191.191  | LOC_Os12g23780.2 |
| DG <sub>HPU</sub> | Os016806_01 | S1 | 0.000  | -0.872 | P | 181.520   | P | 194.299  | P | 355.595  | LOC_Os02g39840.1 |
| DG <sub>HPU</sub> | Os017226_01 | S1 | 0.000  | -0.712 | P | 160.464   | P | 216.175  | P | 354.222  | LOC_Os07g30090.1 |
| DG <sub>HPU</sub> | Os017352_01 | S1 | 1.282  | 1.642  | P | 1196.981  | P | 2910.788 | P | 932.967  | -                |
| DG <sub>HPU</sub> | Os017708_01 | S1 | 1.326  | 0.000  | P | 96.177    | P | 241.076  | P | 183.425  | -                |
| DG <sub>HPU</sub> | Os017718_01 | S1 | 1.087  | 0.000  | P | 1149.950  | P | 2442.862 | P | 2309.835 | -                |
| DG <sub>HPU</sub> | Os018215_01 | S1 | 1.875  | 1.189  | P | 131.930   | P | 484.052  | P | 212.328  | LOC_Os10g10130.2 |
| DG <sub>HPU</sub> | Os018485_01 | S1 | -0.870 | 0.000  | P | 339.725   | P | 185.936  | P | 197.936  | LOC_Os10g02350.1 |
| DG <sub>HPU</sub> | Os018489_01 | S1 | 0.000  | 0.820  | P | 128.452   | P | 139.396  | P | 78.986   | LOC_Os10g37430.1 |
| DG <sub>HPU</sub> | Os018524_01 | S1 | 0.000  | -0.683 | P | 963.423   | P | 925.394  | P | 1485.617 | LOC_Os05g07050.1 |
| DG <sub>HPU</sub> | Os018691_01 | S1 | 0.000  | -0.747 | P | 217.147   | P | 184.546  | P | 309.641  | LOC_Os03g08430.1 |
| DG <sub>HPU</sub> | Os018960_01 | S1 | -0.934 | 0.000  | P | 10755.259 | P | 5628.481 | P | 5664.740 | LOC_Os03g52840.1 |
| DG <sub>HPU</sub> | Os019058_01 | S1 | 1.026  | 0.000  | P | 667.065   | P | 1358.390 | P | 1304.745 | LOC_Os06g02370.1 |
| DG <sub>HPU</sub> | Os020363_01 | S1 | -0.866 | 0.000  | P | 457.231   | P | 250.837  | P | 322.682  | LOC_Os02g21260.1 |
| DG <sub>HPU</sub> | Os020394_01 | S1 | 1.017  | 0.000  | P | 100.144   | P | 202.639  | P | 169.150  | LOC_Os12g41200.1 |
| DG <sub>HPU</sub> | Os020797_01 | S1 | -0.879 | 0.000  | P | 460.712   | P | 250.527  | P | 320.937  | LOC_Os04g05650.1 |
| DG <sub>HPU</sub> | Os021187_01 | S1 | 0.000  | 1.285  | P | 520.828   | P | 977.596  | P | 401.095  | LOC_Os03g49260.1 |
| DG <sub>HPU</sub> | Os021798_01 | S1 | 0.000  | 0.793  | P | 151.599   | P | 198.839  | P | 114.759  | LOC_Os11g08380.1 |
| DG <sub>HPU</sub> | Os022134_01 | S1 | 0.000  | -0.770 | P | 498.985   | P | 373.693  | P | 637.328  | LOC_Os03g22010.1 |
| DG <sub>HPU</sub> | Os022279_01 | S1 | 0.000  | 0.899  | P | 130.600   | P | 230.425  | P | 123.565  | LOC_Os08g31850.1 |
| DG <sub>HPU</sub> | Os022367_01 | S1 | 0.000  | 0.805  | P | 165.402   | P | 194.471  | P | 111.313  | LOC_Os02g03730.1 |
| DG <sub>HPU</sub> | Os022874_01 | S1 | 0.000  | 0.853  | P | 239.432   | P | 271.577  | P | 150.316  | -                |
| DG <sub>HPU</sub> | Os023453_01 | S1 | 0.000  | 0.817  | P | 158.265   | P | 163.778  | P | 92.978   | LOC_Os03g06610.1 |
| DG <sub>HPU</sub> | Os023663_01 | S1 | 0.000  | 0.881  | P | 411.320   | P | 549.951  | P | 298.548  | LOC_Os07g18560.1 |
| DG <sub>HPU</sub> | Os023734_01 | S1 | 10.000 | -0.851 | A | 44.833    | P | 294.489  | P | 531.230  | LOC_Os02g11870.1 |
| DG <sub>HPU</sub> | Os024073_01 | S1 | 1.680  | 0.000  | P | 183.162   | P | 586.849  | P | 391.013  | -                |
| DG <sub>HPU</sub> | Os024099_01 | S1 | -1.053 | 0.000  | P | 691.883   | P | 333.422  | P | 412.431  | LOC_Os01g51690.1 |
| DG <sub>HPU</sub> | Os024208_01 | S1 | -1.349 | 0.000  | P | 1553.087  | P | 609.795  | P | 763.346  | -                |
| DG <sub>HPU</sub> | Os024527_01 | S1 | 0.000  | -0.947 | P | 724.836   | P | 604.824  | P | 1166.408 | LOC_Os03g18230.1 |
| DG <sub>HPU</sub> | Os024704_01 | S1 | 0.000  | 0.833  | P | 325.525   | P | 443.020  | P | 248.617  | -                |
| DG <sub>HPU</sub> | Os024814_01 | S1 | 1.246  | 0.000  | P | 226.027   | P | 536.048  | P | 373.681  | LOC_Os09g07150.1 |

|                   |             |    |        |        |   |          |   |           |   |          |                  |
|-------------------|-------------|----|--------|--------|---|----------|---|-----------|---|----------|------------------|
| DG <sub>HPU</sub> | Os024906_01 | S1 | 0.000  | 0.883  | P | 583.231  | P | 623.730   | P | 338.241  | -                |
| DG <sub>HPU</sub> | Os024920_01 | S1 | 0.000  | -0.660 | P | 1140.147 | P | 754.750   | P | 1192.631 | LOC_Os03g53340.3 |
| DG <sub>HPU</sub> | Os025209_01 | S1 | 1.056  | 0.000  | P | 151.009  | P | 313.875   | P | 218.564  | LOC_Os10g05600.1 |
| DG <sub>HPU</sub> | Os025787_01 | S1 | 1.857  | 1.626  | P | 2666.693 | P | 9662.293  | P | 3131.332 | LOC_Os12g04980.1 |
| DG <sub>HPU</sub> | Os025872_01 | S1 | 0.000  | 0.982  | P | 129.752  | P | 225.501   | P | 114.136  | LOC_Os11g01450.1 |
| DG <sub>HPU</sub> | Os026790_01 | S1 | -0.891 | 0.000  | P | 760.140  | P | 409.942   | P | 567.824  | LOC_Os05g06120.1 |
| DG <sub>HPU</sub> | Os027175_01 | S1 | 1.047  | 0.000  | P | 341.099  | P | 704.777   | P | 721.234  | -                |
| DG <sub>HPU</sub> | Os027821_01 | S1 | -0.899 | 0.000  | P | 847.586  | P | 454.506   | P | 438.149  | LOC_Os07g37730.1 |
| DG <sub>HPU</sub> | Os028210_01 | S1 | 0.000  | 0.887  | P | 167.644  | P | 245.268   | P | 132.649  | LOC_Os01g65810.1 |
| DG <sub>HPU</sub> | Os028450_01 | S1 | -1.014 | -0.889 | P | 397.629  | P | 196.942   | P | 364.621  | LOC_Os04g45350.1 |
| DG <sub>HPU</sub> | Os028543_01 | S1 | 10.000 | 0.994  | A | 85.694   | P | 299.417   | P | 150.333  | LOC_Os03g47890.1 |
| DG <sub>HPU</sub> | Os028605_01 | S1 | -1.127 | 0.000  | P | 1588.857 | P | 727.447   | P | 1041.329 | LOC_Os02g06380.1 |
| DG <sub>HPU</sub> | Os028680_01 | S1 | 10.000 | -0.804 | A | 52.557   | P | 1073.510  | P | 1873.680 | LOC_Os07g06100.1 |
| DG <sub>HPU</sub> | Os029050_01 | S1 | 0.000  | 0.984  | P | 413.318  | P | 699.255   | P | 353.510  | LOC_Os10g35260.1 |
| DG <sub>HPU</sub> | Os029456_01 | S1 | -0.897 | 0.000  | P | 1178.458 | P | 632.842   | P | 725.865  | LOC_Os07g02860.1 |
| DG <sub>HPU</sub> | Os029535_01 | S1 | 1.338  | 0.786  | P | 2932.328 | P | 7411.470  | P | 4297.451 | LOC_Os06g19770.1 |
| DG <sub>HPU</sub> | Os029793_01 | S1 | 1.220  | 0.000  | P | 286.321  | P | 666.851   | P | 424.222  | LOC_Os02g57810.1 |
| DG <sub>HPU</sub> | Os029843_01 | S1 | -0.879 | 0.000  | P | 725.200  | P | 394.347   | P | 334.364  | LOC_Os05g08650.1 |
| DG <sub>HPU</sub> | Os030442_01 | S1 | 1.179  | 0.000  | P | 1290.820 | P | 2921.944  | P | 2332.621 | LOC_Os06g10290.1 |
| DG <sub>HPU</sub> | Os030724_01 | S1 | 0.000  | -0.663 | P | 250.354  | P | 215.104   | P | 340.474  | -                |
| DG <sub>HPU</sub> | Os030769_01 | S1 | 1.501  | 10.000 | P | 363.358  | P | 1028.621  | A | 279.453  | LOC_Os12g30690.1 |
| DG <sub>HPU</sub> | Os030865_01 | S1 | 1.381  | 1.206  | P | 1351.743 | P | 3519.840  | P | 1526.157 | LOC_Os01g16400.1 |
| DG <sub>HPU</sub> | Os031169_01 | S1 | -0.917 | 0.000  | P | 471.293  | P | 249.681   | P | 269.999  | LOC_Os10g20080.1 |
| DG <sub>HPU</sub> | Os031292_01 | S1 | -0.929 | 0.000  | P | 513.849  | P | 269.817   | P | 306.771  | LOC_Os12g03570.1 |
| DG <sub>HPU</sub> | Os031781_01 | S1 | 0.000  | 0.903  | P | 3994.207 | P | 5355.150  | P | 2863.804 | LOC_Os06g30530.1 |
| DG <sub>HPU</sub> | Os032194_01 | S1 | 1.251  | 0.000  | P | 4380.533 | P | 10422.331 | P | 6127.250 | LOC_Os08g43530.1 |
| DG <sub>HPU</sub> | Os032594_01 | S1 | 10.000 | 1.600  | A | 626.669  | P | 473.549   | P | 156.178  | LOC_Os01g33360.1 |
| DG <sub>HPU</sub> | Os032996_01 | S1 | 0.000  | -0.769 | P | 817.775  | P | 848.261   | P | 1445.884 | LOC_Os04g28690.1 |
| DG <sub>HPU</sub> | Os033046_01 | S1 | -1.251 | 0.000  | P | 2966.876 | P | 1246.965  | P | 1581.241 | LOC_Os10g35330.1 |
| DG <sub>HPU</sub> | Os033509_01 | S1 | 0.000  | 0.962  | P | 211.546  | P | 332.218   | P | 170.597  | LOC_Os07g12130.1 |
| DG <sub>HPU</sub> | Os033569_01 | S1 | -0.864 | 0.000  | P | 272.377  | P | 149.635   | P | 128.318  | LOC_Os05g25350.1 |

|                   |             |    |        |        |   |           |   |          |   |          |                  |
|-------------------|-------------|----|--------|--------|---|-----------|---|----------|---|----------|------------------|
| DG <sub>HPU</sub> | Os033901_01 | S1 | 0.000  | -0.715 | P | 1438.041  | P | 1095.161 | P | 1797.086 | LOC_Os02g47490.1 |
| DG <sub>HPU</sub> | Os034073_01 | S1 | -0.967 | 0.000  | P | 630.457   | P | 322.542  | P | 403.433  | -                |
| DG <sub>HPU</sub> | Os034649_01 | S1 | -1.360 | 0.000  | P | 12694.203 | P | 4945.043 | P | 6342.399 | LOC_Os11g47980.1 |
| DG <sub>HPU</sub> | Os034673_01 | S1 | -0.942 | 0.000  | P | 690.523   | P | 359.322  | P | 362.011  | LOC_Os06g02510.3 |
| DG <sub>HPU</sub> | Os035398_01 | S1 | -1.206 | 0.000  | P | 483.947   | P | 209.802  | P | 278.468  | -                |
| DG <sub>HPU</sub> | Os036485_01 | S1 | 0.000  | -0.722 | P | 153.513   | P | 170.430  | P | 281.023  | LOC_Os02g19450.1 |
| DG <sub>HPU</sub> | Os036907_01 | S1 | 1.222  | 0.000  | P | 210.638   | P | 491.353  | P | 408.486  | LOC_Os05g48780.1 |
| DG <sub>HPU</sub> | Os036934_01 | S1 | 0.000  | 0.811  | P | 468.525   | P | 450.082  | P | 256.566  | -                |
| DG <sub>HPU</sub> | Os037049_01 | S1 | 1.289  | 1.083  | P | 1283.416  | P | 3136.077 | P | 1480.331 | LOC_Os08g17980.1 |
| DG <sub>HPU</sub> | Os037064_01 | S1 | 0.000  | -1.024 | P | 706.021   | P | 547.577  | P | 1113.232 | LOC_Os04g20540.1 |
| DG <sub>HPU</sub> | Os037250_01 | S1 | -1.033 | 0.000  | P | 1438.481  | P | 702.915  | P | 689.477  | LOC_Os11g15180.1 |
| DG <sub>HPU</sub> | Os037254_01 | S1 | -0.877 | 0.000  | P | 404.394   | P | 220.267  | P | 340.492  | LOC_Os04g27720.1 |
| DG <sub>HPU</sub> | Os037297_01 | S1 | -1.333 | 0.000  | P | 831.144   | P | 329.993  | P | 391.696  | LOC_Os05g16570.1 |
| DG <sub>HPU</sub> | Os037305_01 | S1 | 0.000  | 0.855  | P | 244.252   | P | 211.513  | P | 116.926  | -                |
| DG <sub>HPU</sub> | Os037383_01 | S1 | 1.038  | 0.000  | P | 490.693   | P | 1007.842 | P | 1028.662 | LOC_Os07g28250.1 |
| DG <sub>HPU</sub> | Os037792_01 | S1 | -1.050 | 0.000  | P | 539.208   | P | 260.404  | P | 306.897  | LOC_Os07g35860.1 |
| DG <sub>HPU</sub> | Os038209_01 | S1 | -1.358 | 0.000  | P | 882.014   | P | 344.037  | P | 411.371  | LOC_Os06g51000.1 |
| DG <sub>HPU</sub> | Os038408_01 | S1 | -0.946 | 0.000  | P | 17510.729 | P | 9091.754 | P | 8573.117 | LOC_Os09g25700.1 |
| DG <sub>HPU</sub> | Os038459_01 | S1 | 0.000  | 1.196  | P | 234.015   | P | 454.917  | P | 198.526  | LOC_Os03g30630.1 |
| DG <sub>HPU</sub> | Os038619_01 | S1 | -0.972 | 0.000  | P | 1224.141  | P | 623.947  | P | 660.312  | -                |
| DG <sub>HPU</sub> | Os039006_01 | S1 | 0.000  | 0.878  | P | 440.660   | P | 408.984  | P | 222.479  | LOC_Os06g44790.1 |
| DG <sub>HPU</sub> | Os039244_01 | S1 | -0.891 | 0.000  | P | 476.279   | P | 256.862  | P | 256.507  | -                |
| DG <sub>HPU</sub> | Os039379_01 | S1 | 1.036  | 0.000  | P | 440.466   | P | 903.438  | P | 735.505  | LOC_Os04g51510.1 |
| DG <sub>HPU</sub> | Os040246_01 | S1 | -1.174 | 0.000  | P | 1905.083  | P | 844.490  | P | 929.453  | LOC_Os08g44670.1 |
| DG <sub>HPU</sub> | Os040497_01 | S1 | -0.923 | 0.000  | P | 939.345   | P | 495.398  | P | 617.715  | LOC_Os12g41420.1 |
| DG <sub>HPU</sub> | Os040616_01 | S1 | -1.019 | 0.000  | P | 827.518   | P | 408.399  | P | 529.582  | LOC_Os01g44330.1 |
| DG <sub>HPU</sub> | Os040966_01 | S1 | 0.000  | 0.834  | P | 299.709   | P | 284.825  | P | 159.761  | LOC_Os11g25300.1 |
| DG <sub>HPU</sub> | Os041419_01 | S1 | 0.000  | 0.821  | P | 121.952   | P | 167.359  | P | 94.750   | LOC_Os08g04680.1 |
| DG <sub>HPU</sub> | Os041507_01 | S1 | 1.159  | 1.227  | P | 264.420   | P | 590.517  | P | 252.351  | -                |
| DG <sub>HPU</sub> | Os041666_01 | S1 | 1.344  | 0.000  | P | 97.972    | P | 248.638  | P | 210.385  | -                |
| DG <sub>HPU</sub> | Os042004_01 | S1 | 0.000  | 0.791  | P | 285.185   | P | 445.551  | P | 257.489  | LOC_Os06g14640.1 |

|                   |             |    |        |        |   |          |   |          |   |          |                  |
|-------------------|-------------|----|--------|--------|---|----------|---|----------|---|----------|------------------|
| DG <sub>HPU</sub> | Os042294_01 | S1 | 1.044  | 0.000  | P | 270.674  | P | 557.954  | P | 455.733  | LOC_Os02g13440.1 |
| DG <sub>HPU</sub> | Os042677_01 | S1 | 10.000 | 1.071  | A | 54.529   | P | 284.504  | P | 135.396  | -                |
| DG <sub>HPU</sub> | Os042854_01 | S1 | 0.000  | -0.799 | P | 8504.641 | P | 5707.774 | P | 9932.865 | LOC_Os04g26880.1 |
| DG <sub>HPU</sub> | Os043010_01 | S1 | 0.000  | 0.876  | P | 380.703  | P | 405.885  | P | 221.124  | LOC_Os12g33370.1 |
| DG <sub>HPU</sub> | Os043245_01 | S1 | 1.220  | 0.000  | P | 786.325  | P | 1832.187 | P | 1384.507 | LOC_Os07g29530.1 |
| DG <sub>HPU</sub> | Os043773_01 | S1 | -0.942 | 0.000  | P | 2830.222 | P | 1473.104 | P | 2056.323 | LOC_Os08g09410.1 |
| DG <sub>HPU</sub> | Os044284_01 | S1 | 0.000  | 1.020  | P | 215.363  | P | 270.794  | P | 133.569  | LOC_Os11g30950.1 |
| DG <sub>HPU</sub> | Os044822_01 | S1 | 0.000  | 1.025  | P | 320.422  | P | 378.643  | P | 186.066  | LOC_Os08g21200.1 |
| DG <sub>HPU</sub> | Os047756_01 | S1 | 1.129  | 1.223  | P | 229.402  | P | 501.732  | P | 214.941  | LOC_Os03g05070.1 |
| DG <sub>HPU</sub> | Os048043_01 | S1 | 1.776  | 1.710  | P | 362.266  | P | 1240.886 | P | 379.322  | LOC_Os06g32674.1 |
| DG <sub>HPU</sub> | Os048165_01 | S1 | -1.037 | 0.000  | P | 583.531  | P | 284.382  | P | 363.845  | LOC_Os04g11970.1 |
| DG <sub>HPU</sub> | Os048756_01 | S1 | -1.706 | -0.725 | P | 1177.696 | P | 361.016  | P | 596.563  | LOC_Os06g23780.1 |
| DG <sub>HPU</sub> | Os049257_01 | S1 | 0.000  | 0.914  | P | 259.517  | P | 275.205  | P | 146.025  | LOC_Os02g13000.1 |
| DG <sub>HPU</sub> | Os049367_01 | S1 | -1.027 | 0.000  | P | 406.095  | P | 199.267  | P | 203.789  | LOC_Os03g40470.1 |
| DG <sub>HPU</sub> | Os050244_01 | S1 | 0.000  | 0.833  | P | 174.860  | P | 192.137  | P | 107.885  | -                |
| DG <sub>HPU</sub> | Os050919_01 | S1 | 0.000  | 0.811  | P | 271.161  | P | 288.931  | P | 164.655  | LOC_Os05g17050.1 |
| DG <sub>HPU</sub> | Os051250_01 | S1 | 1.142  | 0.000  | P | 107.899  | P | 238.163  | P | 141.729  | -                |
| DG <sub>HPU</sub> | Os051869_01 | S1 | -1.220 | 0.000  | P | 1714.500 | P | 735.906  | P | 944.365  | LOC_Os11g45090.1 |
| DG <sub>HPU</sub> | Os051936_01 | S1 | 0.000  | 1.254  | P | 791.964  | P | 865.717  | P | 362.984  | LOC_Os10g39410.1 |
| DG <sub>HPU</sub> | Os052072_01 | S1 | 0.000  | -0.861 | P | 477.142  | P | 280.929  | P | 510.302  | LOC_Os12g26290.2 |
| DG <sub>HPU</sub> | Os052088_01 | S1 | 0.000  | 1.136  | P | 393.295  | P | 444.911  | P | 202.392  | LOC_Os03g14630.1 |
| DG <sub>HPU</sub> | Os052240_01 | S1 | 0.000  | -0.696 | P | 892.529  | P | 668.382  | P | 1083.058 | LOC_Os01g04050.1 |
| DG <sub>HPU</sub> | Os052305_01 | S1 | 0.000  | 0.902  | P | 274.132  | P | 264.748  | P | 141.706  | LOC_Os01g42530.1 |
| DG <sub>HPU</sub> | Os052669_01 | S1 | -0.954 | 0.000  | P | 373.403  | P | 192.693  | P | 287.387  | LOC_Os11g37970.1 |
| DG <sub>HPU</sub> | Os052967_01 | S1 | 1.086  | 0.000  | P | 125.950  | P | 267.340  | P | 226.819  | LOC_Os04g31520.1 |
| DG <sub>HPU</sub> | Os053243_01 | S1 | 1.075  | 0.000  | P | 202.891  | P | 427.455  | P | 444.189  | LOC_Os12g20310.1 |
| DG <sub>HPU</sub> | Os053691_01 | S1 | -0.864 | 0.000  | P | 382.571  | P | 210.249  | P | 219.811  | LOC_Os02g56320.1 |
| DG <sub>HPU</sub> | Os053902_01 | S1 | 1.011  | 0.000  | P | 101.106  | P | 203.773  | P | 172.184  | -                |
| DG <sub>HPU</sub> | Os054176_02 | S1 | -0.929 | 0.000  | P | 2288.193 | P | 1202.066 | P | 1154.102 | -                |
| DG <sub>HPU</sub> | Os054423_01 | S1 | 1.104  | 0.000  | P | 201.466  | P | 433.006  | P | 317.233  | LOC_Os01g05970.1 |
| DG <sub>HPU</sub> | Os054602_01 | S1 | 0.000  | -0.923 | P | 426.748  | P | 478.229  | P | 906.778  | LOC_Os08g35190.2 |



|                   |             |    |                  |        |                  |          |              |          |         |              |                  |               |          |
|-------------------|-------------|----|------------------|--------|------------------|----------|--------------|----------|---------|--------------|------------------|---------------|----------|
| DG <sub>HPU</sub> | Os054726_01 | S1 | 1.756            | 0.000  | P                | 182.282  | P            | 615.607  | P       | 394.402      | LOC_Os02g13660.1 |               |          |
| DG <sub>HPU</sub> | Os054741_01 | S1 | 10.000           | -0.787 | A                | 70.802   | P            | 340.229  | P       | 586.917      | -                |               |          |
| DG <sub>HPU</sub> | Os054845_01 | S1 | 1.132            | 0.000  | P                | 195.281  | P            | 428.081  | P       | 270.699      | -                |               |          |
| DG <sub>HPU</sub> | Os055515_01 | S1 | 0.000            | 0.829  | P                | 295.794  | P            | 263.103  | P       | 148.102      | -                |               |          |
| DG <sub>HPU</sub> | Os055710_01 | S1 | 0.000            | 0.908  | P                | 941.466  | P            | 1146.591 | P       | 611.120      | LOC_Os03g37570.1 |               |          |
| DG <sub>HPU</sub> | Os056418_01 | S1 | -0.902           | 0.000  | P                | 603.419  | P            | 322.939  | P       | 291.393      | LOC_Os09g11520.1 |               |          |
| DG <sub>HPU</sub> | Os056775_01 | S1 | 0.000            | -1.084 | P                | 228.725  | P            | 221.639  | P       | 469.861      | LOC_Os01g71680.1 |               |          |
| DG <sub>HPU</sub> | Os057062_02 | S1 | 0.000            | 0.948  | P                | 323.268  | P            | 323.830  | P       | 167.868      | LOC_Os07g43350.1 |               |          |
| DG <sub>HPU</sub> | Os057210_02 | S1 | 1.072            | 0.000  | P                | 501.397  | P            | 1053.768 | P       | 753.566      | -                |               |          |
| DG <sub>HPU</sub> | GeneID      | S2 | log2(Ratio(L/9)) |        | log2(Ratio(L/P)) |          | Ti_9311.flag |          | Ti_9311 | Ti_LYP9.flag | Ti_LYP9          | Ti_PA64s.flag | Ti_PA64s |
|                   | TIGR5.id    |    |                  |        |                  |          |              |          |         |              |                  |               |          |
| DG <sub>HPU</sub> | Os000174_01 | S2 | 0.885            | 0.000  | P                | 451.373  | P            | 833.416  | P       | 883.079      | LOC_Os04g17100.1 |               |          |
| DG <sub>HPU</sub> | Os000177_01 | S2 | -0.842           | 0.000  | P                | 772.183  | P            | 430.896  | P       | 427.001      | LOC_Os09g38370.1 |               |          |
| DG <sub>HPU</sub> | Os000275_01 | S2 | -0.810           | 0.000  | P                | 344.472  | P            | 196.547  | P       | 170.241      | -                |               |          |
| DG <sub>HPU</sub> | Os000741_01 | S2 | -1.077           | 0.000  | P                | 263.024  | P            | 124.648  | P       | 157.762      | LOC_Os08g25820.2 |               |          |
| DG <sub>HPU</sub> | Os001020_01 | S2 | 0.000            | 0.903  | P                | 185.397  | P            | 202.279  | P       | 108.192      | LOC_Os08g44170.1 |               |          |
| DG <sub>HPU</sub> | Os001272_01 | S2 | -0.796           | 0.000  | P                | 262.317  | P            | 151.045  | P       | 147.655      | -                |               |          |
| DG <sub>HPU</sub> | Os001329_01 | S2 | 0.774            | 0.000  | P                | 291.486  | P            | 498.386  | P       | 435.111      | -                |               |          |
| DG <sub>HPU</sub> | Os001579_01 | S2 | 0.941            | 0.000  | P                | 1474.030 | P            | 2829.635 | P       | 2893.292     | LOC_Os10g36170.1 |               |          |
| DG <sub>HPU</sub> | Os001623_01 | S2 | 0.000            | 0.870  | P                | 202.292  | P            | 189.010  | P       | 103.403      | LOC_Os02g30460.1 |               |          |
| DG <sub>HPU</sub> | Os001674_01 | S2 | 0.000            | 0.914  | P                | 859.306  | P            | 1069.150 | P       | 567.349      | LOC_Os03g54900.2 |               |          |
| DG <sub>HPU</sub> | Os001738_01 | S2 | -0.903           | 0.000  | P                | 1738.018 | P            | 929.586  | P       | 921.633      | LOC_Os02g41860.2 |               |          |
| DG <sub>HPU</sub> | Os001934_01 | S2 | 10.000           | -1.117 | A                | 72.909   | P            | 1388.822 | P       | 3012.778     | -                |               |          |
| DG <sub>HPU</sub> | Os001942_01 | S2 | 0.000            | 0.841  | P                | 1495.448 | P            | 1644.156 | P       | 917.559      | -                |               |          |
| DG <sub>HPU</sub> | Os002001_01 | S2 | 0.865            | 0.000  | P                | 218.856  | P            | 398.474  | P       | 375.652      | LOC_Os05g24580.1 |               |          |
| DG <sub>HPU</sub> | Os002020_01 | S2 | 0.827            | 0.000  | P                | 228.058  | P            | 404.697  | P       | 384.225      | LOC_Os02g33710.1 |               |          |
| DG <sub>HPU</sub> | Os002113_01 | S2 | 0.000            | 0.842  | P                | 2766.611 | P            | 2343.762 | P       | 1307.102     | LOC_Os12g06780.1 |               |          |
| DG <sub>HPU</sub> | Os002387_01 | S2 | 0.000            | 0.843  | P                | 180.494  | P            | 214.309  | P       | 119.461      | -                |               |          |
| DG <sub>HPU</sub> | Os002482_01 | S2 | 0.000            | 1.052  | P                | 205.032  | P            | 182.112  | P       | 87.814       | -                |               |          |
| DG <sub>HPU</sub> | Os002486_01 | S2 | -0.847           | 10.000 | P                | 351.995  | P            | 195.627  | A       | 78.881       | LOC_Os02g12480.1 |               |          |
| DG <sub>HPU</sub> | Os002678_01 | S2 | -1.316           | 0.000  | P                | 9920.405 | P            | 3984.540 | P       | 4831.918     | LOC_Os05g03920.1 |               |          |

|                   |             |    |        |        |   |          |   |           |   |           |                  |
|-------------------|-------------|----|--------|--------|---|----------|---|-----------|---|-----------|------------------|
| DG <sub>HPU</sub> | Os002790_01 | S2 | 0.000  | 0.868  | P | 179.048  | P | 235.112   | P | 128.796   | LOC_Os01g63150.1 |
| DG <sub>HPU</sub> | Os002830_01 | S2 | 0.733  | 10.000 | P | 192.086  | P | 319.200   | A | 161.646   | LOC_Os02g18540.1 |
| DG <sub>HPU</sub> | Os003032_01 | S2 | -0.900 | 0.000  | P | 311.220  | P | 166.828   | P | 142.877   | -                |
| DG <sub>HPU</sub> | Os003956_02 | S2 | -0.790 | 10.000 | P | 415.590  | P | 240.281   | A | 38.582    | -                |
| DG <sub>HPU</sub> | Os004125_01 | S2 | 0.000  | -0.684 | P | 745.165  | P | 703.953   | P | 1130.876  | LOC_Os06g03050.1 |
| DG <sub>HPU</sub> | Os004929_01 | S2 | -0.828 | 0.000  | P | 521.178  | P | 293.578   | P | 248.059   | LOC_Os07g40150.1 |
| DG <sub>HPU</sub> | Os006051_01 | S2 | -0.854 | 0.000  | P | 242.051  | P | 133.892   | P | 150.950   | LOC_Os07g04480.1 |
| DG <sub>HPU</sub> | Os006571_01 | S2 | 0.000  | -0.767 | P | 2824.017 | P | 1851.499  | P | 3151.483  | LOC_Os05g01350.1 |
| DG <sub>HPU</sub> | Os008101_01 | S2 | 0.823  | 0.000  | P | 188.851  | P | 334.184   | P | 318.734   | LOC_Os01g48380.1 |
| DG <sub>HPU</sub> | Os008199_01 | S2 | 0.000  | 0.949  | P | 945.125  | P | 915.135   | P | 474.116   | LOC_Os11g44990.1 |
| DG <sub>HPU</sub> | Os008773_01 | S2 | 0.773  | 0.000  | P | 472.699  | P | 807.797   | P | 938.789   | LOC_Os02g07160.1 |
| DG <sub>HPU</sub> | Os008778_01 | S2 | -0.797 | 0.000  | P | 3201.480 | P | 1842.754  | P | 1611.789  | LOC_Os05g31000.1 |
| DG <sub>HPU</sub> | Os008919_01 | S2 | -0.793 | 0.000  | P | 513.053  | P | 296.029   | P | 255.250   | LOC_Os08g06360.1 |
| DG <sub>HPU</sub> | Os008978_01 | S2 | 0.866  | 10.000 | P | 94.819   | P | 172.818   | A | 160.103   | LOC_Os02g57050.1 |
| DG <sub>HPU</sub> | Os009036_01 | S2 | -0.793 | 0.000  | P | 6631.681 | P | 3826.836  | P | 2803.127  | LOC_Os12g30540.1 |
| DG <sub>HPU</sub> | Os009088_01 | S2 | 0.000  | -0.955 | P | 1365.976 | P | 856.595   | P | 1660.485  | LOC_Os05g12400.1 |
| DG <sub>HPU</sub> | Os009117_01 | S2 | 1.194  | 0.000  | P | 5888.157 | P | 13475.150 | P | 10637.784 | LOC_Os12g02320.1 |
| DG <sub>HPU</sub> | Os009172_01 | S2 | 0.859  | 0.000  | P | 179.879  | P | 326.363   | P | 310.219   | LOC_Os02g36940.1 |
| DG <sub>HPU</sub> | Os009260_01 | S2 | 0.775  | 0.000  | P | 144.928  | P | 247.917   | P | 248.822   | LOC_Os03g37130.1 |
| DG <sub>HPU</sub> | Os009272_01 | S2 | 0.000  | -0.858 | P | 395.475  | P | 324.349   | P | 587.850   | LOC_Os03g29970.1 |
| DG <sub>HPU</sub> | Os009342_01 | S2 | 1.237  | 1.371  | P | 218.365  | P | 514.791   | P | 199.008   | LOC_Os08g09860.1 |
| DG <sub>HPU</sub> | Os009360_01 | S2 | 0.758  | 0.000  | P | 1323.600 | P | 2238.162  | P | 2293.045  | LOC_Os05g23740.1 |
| DG <sub>HPU</sub> | Os009747_01 | S2 | -0.837 | -0.911 | P | 1532.234 | P | 857.959   | P | 1613.230  | LOC_Os05g45050.1 |
| DG <sub>HPU</sub> | Os009972_01 | S2 | -0.814 | 0.000  | P | 593.288  | P | 337.430   | P | 354.588   | -                |
| DG <sub>HPU</sub> | Os009986_01 | S2 | 0.000  | -0.673 | P | 318.545  | P | 395.633   | P | 630.772   | -                |
| DG <sub>HPU</sub> | Os010085_01 | S2 | 0.905  | 0.000  | P | 131.173  | P | 245.609   | P | 219.961   | LOC_Os01g15979.1 |
| DG <sub>HPU</sub> | Os010179_01 | S2 | 0.000  | -0.685 | P | 559.020  | P | 485.793   | P | 781.110   | LOC_Os09g30410.1 |
| DG <sub>HPU</sub> | Os010193_01 | S2 | -1.134 | 10.000 | P | 376.971  | P | 171.786   | A | 183.959   | LOC_Os12g34010.1 |
| DG <sub>HPU</sub> | Os010318_01 | S2 | 0.000  | -0.825 | P | 842.995  | P | 801.643   | P | 1420.618  | -                |
| DG <sub>HPU</sub> | Os010394_01 | S2 | 0.000  | 0.975  | P | 576.074  | P | 589.789   | P | 300.062   | -                |
| DG <sub>HPU</sub> | Os010429_01 | S2 | -0.812 | 0.000  | P | 1907.591 | P | 1086.224  | P | 899.962   | LOC_Os06g06570.1 |

|                   |             |    |        |        |   |          |   |          |   |          |                  |
|-------------------|-------------|----|--------|--------|---|----------|---|----------|---|----------|------------------|
| DG <sub>HPU</sub> | Os010714_01 | S2 | 0.000  | -0.641 | P | 678.308  | P | 473.066  | P | 737.541  | LOC_Os12g13400.1 |
| DG <sub>HPU</sub> | Os010742_01 | S2 | 0.000  | -0.629 | P | 427.761  | P | 433.646  | P | 670.409  | LOC_Os09g29210.2 |
| DG <sub>HPU</sub> | Os010797_01 | S2 | 0.000  | 0.919  | P | 222.822  | P | 230.147  | P | 121.718  | LOC_Os04g42720.1 |
| DG <sub>HPU</sub> | Os010844_01 | S2 | 0.747  | 0.000  | P | 1833.331 | P | 3077.737 | P | 3128.015 | LOC_Os03g49310.1 |
| DG <sub>HPU</sub> | Os010953_01 | S2 | 0.000  | -0.907 | P | 221.235  | P | 146.472  | P | 274.622  | LOC_Os09g15420.1 |
| DG <sub>HPU</sub> | Os011001_01 | S2 | 0.000  | -0.640 | P | 336.191  | P | 258.058  | P | 402.262  | LOC_Os05g46480.4 |
| DG <sub>HPU</sub> | Os011043_01 | S2 | 0.840  | 0.000  | P | 91.853   | P | 164.421  | P | 108.341  | LOC_Os09g21770.1 |
| DG <sub>HPU</sub> | Os011134_01 | S2 | 0.000  | -0.669 | P | 875.896  | P | 915.866  | P | 1456.181 | LOC_Os01g37000.1 |
| DG <sub>HPU</sub> | Os011239_01 | S2 | -0.824 | 0.000  | P | 868.972  | P | 491.014  | P | 425.172  | LOC_Os05g38720.1 |
| DG <sub>HPU</sub> | Os011326_01 | S2 | 0.851  | 0.000  | P | 362.351  | P | 653.757  | P | 641.173  | LOC_Os07g37220.1 |
| DG <sub>HPU</sub> | Os011412_01 | S2 | 0.814  | 0.000  | P | 132.126  | P | 232.308  | P | 151.056  | LOC_Os11g37050.1 |
| DG <sub>HPU</sub> | Os011415_01 | S2 | -0.800 | 0.000  | P | 3969.325 | P | 2279.582 | P | 2934.019 | LOC_Os12g10604.1 |
| DG <sub>HPU</sub> | Os011513_01 | S2 | 0.818  | 0.000  | P | 87.849   | P | 154.898  | P | 142.315  | LOC_Os09g32988.1 |
| DG <sub>HPU</sub> | Os011628_01 | S2 | 0.000  | 0.889  | P | 343.244  | P | 318.479  | P | 171.923  | LOC_Os02g45490.4 |
| DG <sub>HPU</sub> | Os011816_01 | S2 | -1.235 | 0.000  | P | 1012.188 | P | 430.078  | P | 562.708  | -                |
| DG <sub>HPU</sub> | Os011893_01 | S2 | -1.078 | 0.000  | P | 390.670  | P | 185.030  | P | 180.446  | LOC_Os03g08624.1 |
| DG <sub>HPU</sub> | Os011899_01 | S2 | -0.875 | 0.000  | P | 319.323  | P | 174.129  | P | 209.528  | LOC_Os04g06770.2 |
| DG <sub>HPU</sub> | Os012218_01 | S2 | 0.000  | -0.728 | P | 352.383  | P | 257.300  | P | 426.216  | LOC_Os02g41550.3 |
| DG <sub>HPU</sub> | Os012427_01 | S2 | 0.000  | 0.836  | P | 354.066  | P | 394.551  | P | 220.969  | LOC_Os05g25370.1 |
| DG <sub>HPU</sub> | Os012534_01 | S2 | -0.862 | 0.000  | P | 290.998  | P | 160.072  | P | 161.775  | LOC_Os03g18900.1 |
| DG <sub>HPU</sub> | Os012584_01 | S2 | -1.313 | 0.000  | P | 759.338  | P | 305.618  | P | 447.861  | LOC_Os02g51610.2 |
| DG <sub>HPU</sub> | Os012762_01 | S2 | 0.753  | 0.000  | P | 118.107  | P | 199.107  | P | 228.675  | LOC_Os09g39230.1 |
| DG <sub>HPU</sub> | Os012771_01 | S2 | -1.747 | -0.967 | P | 4711.251 | P | 1403.899 | P | 2743.734 | LOC_Os05g46220.1 |
| DG <sub>HPU</sub> | Os012800_01 | S2 | 0.000  | 0.828  | P | 237.893  | P | 229.102  | P | 129.080  | LOC_Os02g10190.1 |
| DG <sub>HPU</sub> | Os013141_01 | S2 | 0.862  | 0.000  | P | 146.927  | P | 267.062  | P | 291.692  | LOC_Os06g26340.1 |
| DG <sub>HPU</sub> | Os013149_01 | S2 | 0.000  | 0.993  | P | 148.530  | P | 176.376  | P | 88.646   | LOC_Os07g48300.1 |
| DG <sub>HPU</sub> | Os013169_01 | S2 | -0.933 | 0.000  | P | 6253.796 | P | 3274.436 | P | 3416.094 | LOC_Os04g36720.1 |
| DG <sub>HPU</sub> | Os013183_01 | S2 | 0.782  | 0.000  | P | 108.804  | P | 187.040  | P | 187.936  | LOC_Os02g34470.3 |
| DG <sub>HPU</sub> | Os013225_01 | S2 | -0.920 | 0.000  | P | 1303.491 | P | 689.037  | P | 631.158  | LOC_Os06g12110.1 |
| DG <sub>HPU</sub> | Os013394_01 | S2 | 0.000  | -0.766 | P | 436.572  | P | 385.952  | P | 656.310  | LOC_Os01g13540.1 |
| DG <sub>HPU</sub> | Os013502_01 | S2 | 0.000  | 0.865  | P | 266.082  | P | 346.335  | P | 190.166  | LOC_Os04g22900.3 |

|                   |             |    |        |        |   |          |   |          |   |          |                  |
|-------------------|-------------|----|--------|--------|---|----------|---|----------|---|----------|------------------|
| DG <sub>HPU</sub> | Os013530_01 | S2 | 0.000  | 0.835  | P | 447.555  | P | 420.287  | P | 235.549  | LOC_Os08g30060.2 |
| DG <sub>HPU</sub> | Os013670_01 | S2 | -0.957 | 10.000 | P | 297.279  | P | 153.085  | A | 69.694   | LOC_Os07g42770.1 |
| DG <sub>HPU</sub> | Os013978_01 | S2 | 0.774  | 0.000  | P | 140.435  | P | 240.076  | P | 240.521  | LOC_Os12g13460.1 |
| DG <sub>HPU</sub> | Os014092_01 | S2 | 0.771  | 0.000  | P | 159.269  | P | 271.700  | P | 252.689  | LOC_Os11g08300.1 |
| DG <sub>HPU</sub> | Os014257_01 | S2 | 0.847  | 0.000  | P | 105.586  | P | 189.930  | P | 153.031  | LOC_Os09g19820.1 |
| DG <sub>HPU</sub> | Os014284_01 | S2 | 0.000  | 0.826  | P | 299.003  | P | 353.541  | P | 199.452  | LOC_Os05g33820.1 |
| DG <sub>HPU</sub> | Os014335_01 | S2 | 0.781  | 0.000  | P | 111.152  | P | 190.997  | P | 176.163  | LOC_Os02g31150.1 |
| DG <sub>HPU</sub> | Os014364_01 | S2 | 1.023  | 1.503  | P | 636.832  | P | 1294.243 | P | 456.492  | LOC_Os01g45914.1 |
| DG <sub>HPU</sub> | Os014409_01 | S2 | 0.000  | -0.816 | P | 2305.349 | P | 2474.252 | P | 4355.149 | LOC_Os08g35939.1 |
| DG <sub>HPU</sub> | Os014456_01 | S2 | 0.874  | 0.000  | P | 106.697  | P | 195.493  | P | 187.563  | LOC_Os01g64650.3 |
| DG <sub>HPU</sub> | Os014877_01 | S2 | 0.000  | -0.662 | P | 304.901  | P | 192.492  | P | 304.621  | LOC_Os05g02750.1 |
| DG <sub>HPU</sub> | Os015010_01 | S2 | -0.879 | 0.000  | P | 306.792  | P | 166.873  | P | 149.279  | LOC_Os11g43950.1 |
| DG <sub>HPU</sub> | Os015041_01 | S2 | -0.895 | 0.000  | P | 525.851  | P | 282.834  | P | 371.377  | LOC_Os01g51360.1 |
| DG <sub>HPU</sub> | Os015150_01 | S2 | 0.000  | 0.857  | P | 3691.982 | P | 3341.447 | P | 1844.862 | LOC_Os06g41010.4 |
| DG <sub>HPU</sub> | Os015828_01 | S2 | 0.723  | 0.000  | P | 219.842  | P | 362.786  | P | 386.601  | LOC_Os10g21110.1 |
| DG <sub>HPU</sub> | Os015914_01 | S2 | 0.000  | -0.746 | P | 402.027  | P | 283.467  | P | 475.373  | -                |
| DG <sub>HPU</sub> | Os016311_01 | S2 | 0.000  | -0.661 | P | 322.849  | P | 304.225  | P | 480.880  | LOC_Os03g48480.1 |
| DG <sub>HPU</sub> | Os016336_01 | S2 | -1.216 | 0.000  | P | 289.355  | P | 124.566  | P | 129.195  | LOC_Os06g05424.1 |
| DG <sub>HPU</sub> | Os016394_01 | S2 | 0.000  | 0.856  | P | 1133.543 | P | 919.106  | P | 507.789  | LOC_Os04g42900.1 |
| DG <sub>HPU</sub> | Os016404_01 | S2 | -1.147 | 0.000  | P | 478.856  | P | 216.222  | P | 213.916  | LOC_Os01g15610.1 |
| DG <sub>HPU</sub> | Os016457_01 | S2 | -1.176 | 0.000  | P | 646.029  | P | 285.977  | P | 424.054  | -                |
| DG <sub>HPU</sub> | Os016458_01 | S2 | -0.804 | 0.000  | P | 1129.025 | P | 646.585  | P | 912.068  | LOC_Os01g22010.3 |
| DG <sub>HPU</sub> | Os016689_01 | S2 | -0.928 | 10.000 | P | 311.379  | P | 163.638  | A | 92.485   | LOC_Os08g01514.1 |
| DG <sub>HPU</sub> | Os016716_01 | S2 | 1.214  | 0.000  | P | 1752.902 | P | 4067.410 | P | 3360.205 | LOC_Os02g10120.1 |
| DG <sub>HPU</sub> | Os016831_01 | S2 | -0.829 | 0.000  | P | 252.768  | P | 142.322  | P | 175.879  | LOC_Os03g04570.1 |
| DG <sub>HPU</sub> | Os016919_01 | S2 | -1.021 | 0.000  | P | 1036.730 | P | 510.725  | P | 438.519  | LOC_Os02g01590.1 |
| DG <sub>HPU</sub> | Os016953_01 | S2 | 0.000  | 0.838  | P | 710.021  | P | 554.596  | P | 310.244  | LOC_Os05g35710.2 |
| DG <sub>HPU</sub> | Os017246_01 | S2 | 0.000  | 0.910  | P | 418.591  | P | 416.016  | P | 221.446  | LOC_Os12g02980.1 |
| DG <sub>HPU</sub> | Os017298_01 | S2 | 0.000  | 0.857  | P | 439.135  | P | 359.386  | P | 198.370  | -                |
| DG <sub>HPU</sub> | Os017352_01 | S2 | -0.838 | 0.000  | P | 797.376  | P | 446.103  | P | 529.481  | -                |
| DG <sub>HPU</sub> | Os017442_01 | S2 | 0.000  | -0.661 | P | 4519.751 | P | 3339.934 | P | 5279.499 | LOC_Os02g20860.1 |

|                   |             |    |        |        |   |           |   |           |   |           |                  |
|-------------------|-------------|----|--------|--------|---|-----------|---|-----------|---|-----------|------------------|
| DG <sub>HPU</sub> | Os017490_01 | S2 | -0.913 | 0.000  | P | 379.589   | P | 201.607   | P | 183.002   | LOC_Os05g48050.1 |
| DG <sub>HPU</sub> | Os017555_01 | S2 | 0.000  | -0.814 | P | 288.791   | P | 313.272   | P | 550.652   | LOC_Os03g53860.1 |
| DG <sub>HPU</sub> | Os017668_01 | S2 | 0.000  | 0.976  | P | 265.711   | P | 236.095   | P | 120.005   | LOC_Os05g47442.1 |
| DG <sub>HPU</sub> | Os017780_01 | S2 | 0.000  | 1.019  | P | 435.289   | P | 430.373   | P | 212.422   | LOC_Os05g51180.1 |
| DG <sub>HPU</sub> | Os017796_01 | S2 | 0.742  | 0.000  | P | 795.824   | P | 1330.926  | P | 883.334   | LOC_Os03g29540.2 |
| DG <sub>HPU</sub> | Os017896_01 | S2 | 0.000  | 0.868  | P | 852.026   | P | 669.137   | P | 366.610   | LOC_Os01g52470.1 |
| DG <sub>HPU</sub> | Os018131_01 | S2 | 0.000  | 0.845  | P | 297.812   | P | 255.163   | P | 142.033   | LOC_Os12g42140.1 |
| DG <sub>HPU</sub> | Os018473_01 | S2 | 0.000  | 0.924  | P | 182.749   | P | 198.911   | P | 104.818   | LOC_Os01g25820.1 |
| DG <sub>HPU</sub> | Os018564_01 | S2 | 0.737  | 0.000  | P | 96.725    | P | 161.175   | P | 150.381   | LOC_Os12g12990.1 |
| DG <sub>HPU</sub> | Os018691_01 | S2 | 0.000  | -0.627 | P | 228.641   | P | 210.238   | P | 324.594   | LOC_Os03g08430.1 |
| DG <sub>HPU</sub> | Os018744_01 | S2 | -0.981 | 0.000  | P | 720.796   | P | 365.089   | P | 490.039   | LOC_Os08g39630.1 |
| DG <sub>HPU</sub> | Os018786_01 | S2 | -0.855 | 0.000  | P | 2689.121  | P | 1486.975  | P | 1298.931  | LOC_Os03g16670.1 |
| DG <sub>HPU</sub> | Os018915_01 | S2 | -0.821 | 0.000  | P | 2511.127  | P | 1421.468  | P | 1637.018  | LOC_Os04g43760.1 |
| DG <sub>HPU</sub> | Os019004_01 | S2 | 0.000  | 0.877  | P | 326.933   | P | 255.803   | P | 139.281   | LOC_Os10g37340.1 |
| DG <sub>HPU</sub> | Os019019_01 | S2 | 0.000  | -0.819 | P | 17841.449 | P | 17551.304 | P | 30956.881 | LOC_Os06g07830.1 |
| DG <sub>HPU</sub> | Os019393_01 | S2 | 0.000  | -0.646 | P | 188.750   | P | 161.715   | P | 253.058   | LOC_Os09g08990.1 |
| DG <sub>HPU</sub> | Os019634_01 | S2 | 0.000  | 0.970  | P | 961.638   | P | 902.915   | P | 461.058   | LOC_Os06g02380.2 |
| DG <sub>HPU</sub> | Os019649_01 | S2 | 0.766  | 0.000  | P | 131.460   | P | 223.521   | P | 208.432   | LOC_Os05g26820.1 |
| DG <sub>HPU</sub> | Os020130_01 | S2 | 0.000  | 0.852  | P | 171.685   | P | 263.169   | P | 145.755   | LOC_Os05g31670.1 |
| DG <sub>HPU</sub> | Os020350_01 | S2 | 0.786  | 10.000 | P | 90.606    | P | 156.256   | A | 96.917    | LOC_Os10g27230.3 |
| DG <sub>HPU</sub> | Os020435_01 | S2 | 0.910  | 0.000  | P | 93.076    | P | 174.890   | P | 174.086   | LOC_Os01g54560.1 |
| DG <sub>HPU</sub> | Os020697_01 | S2 | 0.000  | 0.828  | P | 392.638   | P | 451.119   | P | 254.171   | LOC_Os08g13690.1 |
| DG <sub>HPU</sub> | Os020710_01 | S2 | 0.000  | 0.839  | P | 163.745   | P | 201.392   | P | 112.548   | LOC_Os10g36950.1 |
| DG <sub>HPU</sub> | Os020739_01 | S2 | 0.837  | 0.000  | P | 109.419   | P | 195.421   | P | 132.385   | LOC_Os09g03090.1 |
| DG <sub>HPU</sub> | Os020759_01 | S2 | 0.000  | 0.827  | P | 153.318   | P | 174.481   | P | 98.331    | LOC_Os02g30180.1 |
| DG <sub>HPU</sub> | Os021454_01 | S2 | 0.000  | 0.834  | P | 1074.371  | P | 942.351   | P | 528.685   | LOC_Os03g37970.1 |
| DG <sub>HPU</sub> | Os021532_01 | S2 | 0.000  | 0.924  | P | 312.489   | P | 270.396   | P | 142.478   | LOC_Os11g34230.1 |
| DG <sub>HPU</sub> | Os021588_01 | S2 | 0.000  | -0.635 | P | 6015.465  | P | 6461.959  | P | 10037.380 | -                |
| DG <sub>HPU</sub> | Os021635_01 | S2 | -0.804 | 0.000  | P | 444.202   | P | 254.389   | P | 383.511   | LOC_Os02g09510.1 |
| DG <sub>HPU</sub> | Os021803_01 | S2 | 0.754  | 0.000  | P | 109.915   | P | 185.370   | P | 138.658   | LOC_Os03g10469.1 |
| DG <sub>HPU</sub> | Os021807_01 | S2 | 0.000  | 0.868  | P | 1240.564  | P | 1111.006  | P | 608.745   | -                |

|                   |             |    |        |        |   |           |   |           |   |           |                  |
|-------------------|-------------|----|--------|--------|---|-----------|---|-----------|---|-----------|------------------|
| DG <sub>HPU</sub> | Os021893_01 | S2 | -0.890 | 0.000  | P | 399.758   | P | 215.746   | P | 314.282   | LOC_Os09g35030.1 |
| DG <sub>HPU</sub> | Os021895_01 | S2 | -1.739 | -1.610 | P | 1324.997  | P | 396.955   | P | 1211.472  | LOC_Os08g28180.2 |
| DG <sub>HPU</sub> | Os022130_01 | S2 | 0.000  | -0.963 | P | 647.637   | P | 500.649   | P | 975.740   | LOC_Os05g12640.3 |
| DG <sub>HPU</sub> | Os022144_01 | S2 | 10.000 | -0.623 | A | 72.621    | P | 241.352   | P | 371.671   | LOC_Os01g35789.1 |
| DG <sub>HPU</sub> | Os022407_01 | S2 | 0.000  | -0.679 | P | 146.769   | P | 158.239   | P | 253.286   | LOC_Os01g12440.1 |
| DG <sub>HPU</sub> | Os022446_01 | S2 | -0.804 | 10.000 | P | 209.917   | P | 120.258   | A | 92.683    | -                |
| DG <sub>HPU</sub> | Os022480_01 | S2 | 0.000  | -0.712 | P | 204.623   | P | 200.692   | P | 328.717   | LOC_Os01g18220.1 |
| DG <sub>HPU</sub> | Os022563_01 | S2 | 0.986  | 0.913  | P | 470.499   | P | 931.839   | P | 494.769   | LOC_Os06g04290.1 |
| DG <sub>HPU</sub> | Os022572_01 | S2 | -1.366 | 0.000  | P | 16526.923 | P | 6412.331  | P | 7595.876  | LOC_Os12g36980.1 |
| DG <sub>HPU</sub> | Os023065_01 | S2 | 0.000  | -0.629 | P | 1562.875  | P | 1448.392  | P | 2240.238  | LOC_Os01g20120.1 |
| DG <sub>HPU</sub> | Os023496_01 | S2 | 0.000  | -0.685 | P | 229.760   | P | 229.645   | P | 369.303   | LOC_Os01g70000.1 |
| DG <sub>HPU</sub> | Os023589_01 | S2 | 1.027  | 0.000  | P | 115.375   | P | 235.094   | P | 222.955   | LOC_Os05g05650.1 |
| DG <sub>HPU</sub> | Os023590_01 | S2 | 0.917  | 10.000 | P | 107.842   | P | 203.691   | A | 194.131   | -                |
| DG <sub>HPU</sub> | Os023778_01 | S2 | -0.889 | 0.000  | P | 807.830   | P | 436.188   | P | 389.008   | LOC_Os01g63010.1 |
| DG <sub>HPU</sub> | Os023842_01 | S2 | -0.932 | 0.000  | P | 257.490   | P | 134.998   | P | 129.897   | LOC_Os04g53300.1 |
| DG <sub>HPU</sub> | Os023933_01 | S2 | -1.306 | -0.811 | P | 2242.034  | P | 906.655   | P | 1590.404  | LOC_Os04g33670.1 |
| DG <sub>HPU</sub> | Os023998_01 | S2 | 0.000  | -0.654 | P | 389.437   | P | 345.370   | P | 543.534   | LOC_Os08g42570.1 |
| DG <sub>HPU</sub> | Os024007_01 | S2 | 0.000  | -0.624 | P | 464.860   | P | 359.060   | P | 553.245   | LOC_Os01g29330.1 |
| DG <sub>HPU</sub> | Os024029_01 | S2 | -0.880 | 0.000  | P | 438.965   | P | 238.552   | P | 195.012   | LOC_Os04g46440.1 |
| DG <sub>HPU</sub> | Os024059_01 | S2 | -1.122 | 0.000  | P | 704.011   | P | 323.553   | P | 383.863   | -                |
| DG <sub>HPU</sub> | Os024063_01 | S2 | 0.876  | 0.000  | P | 225.100   | P | 412.984   | P | 396.175   | LOC_Os12g38230.1 |
| DG <sub>HPU</sub> | Os024093_01 | S2 | 0.000  | -0.645 | P | 21136.048 | P | 23751.176 | P | 37140.578 | LOC_Os03g22820.1 |
| DG <sub>HPU</sub> | Os024178_01 | S2 | 0.000  | 0.826  | P | 294.290   | P | 244.247   | P | 137.788   | LOC_Os12g44320.1 |
| DG <sub>HPU</sub> | Os024207_01 | S2 | 0.000  | -0.732 | P | 393.003   | P | 342.538   | P | 568.796   | -                |
| DG <sub>HPU</sub> | Os024326_01 | S2 | -1.324 | 10.000 | P | 350.267   | P | 139.868   | A | 105.234   | LOC_Os07g01410.1 |
| DG <sub>HPU</sub> | Os024625_01 | S2 | 0.000  | 0.830  | P | 167.678   | P | 167.741   | P | 94.374    | LOC_Os08g25080.1 |
| DG <sub>HPU</sub> | Os024764_01 | S2 | 0.907  | 0.000  | P | 558.547   | P | 1047.367  | P | 1077.271  | LOC_Os07g46950.4 |
| DG <sub>HPU</sub> | Os025100_01 | S2 | 0.000  | -1.033 | P | 1138.088  | P | 1093.364  | P | 2237.671  | LOC_Os07g09480.1 |
| DG <sub>HPU</sub> | Os025108_01 | S2 | 0.000  | 0.943  | P | 161.819   | P | 199.363   | P | 103.722   | LOC_Os11g24790.1 |
| DG <sub>HPU</sub> | Os025872_01 | S2 | -0.941 | 0.000  | P | 1549.205  | P | 806.984   | P | 960.440   | LOC_Os11g01450.1 |
| DG <sub>HPU</sub> | Os025875_01 | S2 | 0.762  | 10.000 | P | 100.360   | P | 170.241   | A | 69.508    | LOC_Os03g10070.1 |

|                   |             |    |        |        |   |           |   |           |   |           |                  |
|-------------------|-------------|----|--------|--------|---|-----------|---|-----------|---|-----------|------------------|
| DG <sub>HPU</sub> | Os025882_01 | S2 | -0.949 | 0.000  | P | 606.083   | P | 313.837   | P | 304.425   | LOC_Os01g20830.1 |
| DG <sub>HPU</sub> | Os026161_01 | S2 | 0.000  | -0.672 | P | 367.508   | P | 308.293   | P | 491.277   | LOC_Os02g42470.1 |
| DG <sub>HPU</sub> | Os026739_01 | S2 | 0.000  | -1.086 | P | 828.536   | P | 709.001   | P | 1505.034  | LOC_Os08g05910.1 |
| DG <sub>HPU</sub> | Os027615_01 | S2 | 0.000  | -0.638 | P | 31719.430 | P | 33014.279 | P | 51385.572 | LOC_Os09g17740.1 |
| DG <sub>HPU</sub> | Os027760_01 | S2 | 0.000  | -0.828 | P | 332.083   | P | 331.628   | P | 588.735   | LOC_Os12g39880.1 |
| DG <sub>HPU</sub> | Os027938_01 | S2 | 0.000  | 1.066  | P | 283.566   | P | 329.382   | P | 157.364   | -                |
| DG <sub>HPU</sub> | Os028334_01 | S2 | 0.934  | 0.000  | P | 682.865   | P | 1304.880  | P | 950.236   | LOC_Os02g53290.1 |
| DG <sub>HPU</sub> | Os028486_01 | S2 | 0.000  | -0.671 | P | 386.163   | P | 333.755   | P | 531.410   | LOC_Os07g40340.1 |
| DG <sub>HPU</sub> | Os028565_01 | S2 | 0.000  | 0.973  | P | 376.192   | P | 543.647   | P | 276.887   | LOC_Os11g05210.1 |
| DG <sub>HPU</sub> | Os028605_01 | S2 | -0.797 | 0.000  | P | 1261.185  | P | 725.644   | P | 903.142   | LOC_Os02g06380.1 |
| DG <sub>HPU</sub> | Os028781_01 | S2 | 0.000  | -1.011 | P | 289.740   | P | 181.360   | P | 365.484   | LOC_Os11g12810.1 |
| DG <sub>HPU</sub> | Os028942_01 | S2 | -1.279 | 0.000  | P | 1254.519  | P | 517.032   | P | 658.077   | LOC_Os05g26860.1 |
| DG <sub>HPU</sub> | Os029143_01 | S2 | 0.000  | -0.708 | P | 6657.768  | P | 4724.925  | P | 7719.640  | LOC_Os06g43000.1 |
| DG <sub>HPU</sub> | Os029535_01 | S2 | -1.074 | 0.000  | P | 8021.476  | P | 3809.392  | P | 4874.493  | LOC_Os06g19770.1 |
| DG <sub>HPU</sub> | Os030028_01 | S2 | 1.184  | 0.000  | P | 152.021   | P | 345.380   | P | 267.708   | LOC_Os01g02710.1 |
| DG <sub>HPU</sub> | Os030167_01 | S2 | 0.745  | 0.000  | P | 614.795   | P | 1030.316  | P | 896.707   | LOC_Os01g18584.1 |
| DG <sub>HPU</sub> | Os030539_01 | S2 | 0.762  | 0.000  | P | 341.252   | P | 578.640   | P | 602.640   | LOC_Os09g32976.1 |
| DG <sub>HPU</sub> | Os030834_01 | S2 | -0.986 | 0.000  | P | 733.803   | P | 370.465   | P | 514.427   | LOC_Os02g45930.1 |
| DG <sub>HPU</sub> | Os030865_01 | S2 | -0.857 | 0.000  | P | 2463.488  | P | 1360.014  | P | 1806.102  | LOC_Os01g16400.1 |
| DG <sub>HPU</sub> | Os031132_01 | S2 | 0.000  | -0.743 | P | 243.308   | P | 280.082   | P | 468.780   | LOC_Os11g36760.1 |
| DG <sub>HPU</sub> | Os031227_01 | S2 | -0.799 | 0.000  | P | 860.373   | P | 494.507   | P | 500.991   | LOC_Os12g41300.1 |
| DG <sub>HPU</sub> | Os031550_01 | S2 | 0.000  | 1.067  | P | 718.266   | P | 919.495   | P | 438.831   | LOC_Os04g10924.1 |
| DG <sub>HPU</sub> | Os031701_01 | S2 | 0.852  | 0.000  | P | 184.833   | P | 333.513   | P | 299.640   | LOC_Os01g24690.1 |
| DG <sub>HPU</sub> | Os031781_01 | S2 | -0.861 | 0.000  | P | 3050.100  | P | 1679.175  | P | 1279.303  | LOC_Os06g30530.1 |
| DG <sub>HPU</sub> | Os031851_01 | S2 | 0.000  | -1.022 | P | 223.705   | P | 203.514   | P | 413.410   | LOC_Os01g47370.1 |
| DG <sub>HPU</sub> | Os032194_01 | S2 | -0.917 | 0.000  | P | 5833.508  | P | 3088.773  | P | 4065.551  | LOC_Os08g43530.1 |
| DG <sub>HPU</sub> | Os032670_01 | S2 | -0.849 | 0.000  | P | 660.721   | P | 366.706   | P | 296.560   | LOC_Os12g30570.1 |
| DG <sub>HPU</sub> | Os033227_01 | S2 | -0.922 | -0.623 | P | 276.586   | P | 145.959   | P | 224.793   | LOC_Os05g49450.1 |
| DG <sub>HPU</sub> | Os033510_01 | S2 | 0.000  | 0.899  | P | 447.112   | P | 391.237   | P | 209.755   | LOC_Os06g06360.1 |
| DG <sub>HPU</sub> | Os033744_01 | S2 | 0.000  | 0.988  | P | 306.712   | P | 280.944   | P | 141.611   | LOC_Os03g05450.1 |
| DG <sub>HPU</sub> | Os033886_01 | S2 | 0.832  | 0.000  | P | 624.976   | P | 1112.587  | P | 1009.796  | LOC_Os08g33300.1 |

|                   |             |    |        |        |   |          |   |          |   |          |                  |
|-------------------|-------------|----|--------|--------|---|----------|---|----------|---|----------|------------------|
| DG <sub>HPU</sub> | Os033905_01 | S2 | -1.003 | 0.000  | P | 818.982  | P | 408.757  | P | 418.165  | LOC_Os07g09090.1 |
| DG <sub>HPU</sub> | Os034112_01 | S2 | -0.881 | 10.000 | P | 452.261  | P | 245.654  | A | 106.131  | LOC_Os02g40130.1 |
| DG <sub>HPU</sub> | Os034167_01 | S2 | 0.762  | 0.000  | P | 96.607   | P | 163.871  | P | 155.447  | -                |
| DG <sub>HPU</sub> | Os034533_01 | S2 | 0.000  | 0.853  | P | 580.682  | P | 571.801  | P | 316.582  | LOC_Os05g12270.1 |
| DG <sub>HPU</sub> | Os034560_01 | S2 | -1.138 | 0.000  | P | 357.784  | P | 162.550  | P | 183.983  | -                |
| DG <sub>HPU</sub> | Os034598_01 | S2 | -0.801 | 0.000  | P | 4806.570 | P | 2758.160 | P | 2679.093 | LOC_Os05g23050.1 |
| DG <sub>HPU</sub> | Os034700_01 | S2 | 0.000  | -0.628 | P | 222.536  | P | 151.178  | P | 233.582  | LOC_Os06g39040.1 |
| DG <sub>HPU</sub> | Os035057_01 | S2 | 0.000  | 0.852  | P | 322.493  | P | 267.668  | P | 148.248  | LOC_Os10g31200.1 |
| DG <sub>HPU</sub> | Os035502_01 | S2 | 0.825  | 0.000  | P | 122.702  | P | 217.330  | P | 209.270  | LOC_Os02g42400.1 |
| DG <sub>HPU</sub> | Os035651_01 | S2 | -0.921 | -0.683 | P | 381.359  | P | 201.385  | P | 323.405  | LOC_Os05g04760.1 |
| DG <sub>HPU</sub> | Os036025_01 | S2 | -1.070 | 0.000  | P | 1196.892 | P | 570.055  | P | 539.796  | LOC_Os09g36180.1 |
| DG <sub>HPU</sub> | Os036066_01 | S2 | 0.000  | 0.828  | P | 285.964  | P | 261.446  | P | 147.282  | LOC_Os02g09190.1 |
| DG <sub>HPU</sub> | Os036348_01 | S2 | -1.404 | 0.000  | P | 6043.869 | P | 2283.900 | P | 3223.867 | LOC_Os12g14450.1 |
| DG <sub>HPU</sub> | Os036380_01 | S2 | 0.000  | -0.691 | P | 190.600  | P | 228.498  | P | 368.946  | LOC_Os09g30120.1 |
| DG <sub>HPU</sub> | Os036477_01 | S2 | -1.536 | 10.000 | P | 570.835  | P | 196.830  | A | 76.604   | LOC_Os05g35450.1 |
| DG <sub>HPU</sub> | Os036652_01 | S2 | 0.925  | 0.000  | P | 99.828   | P | 189.506  | P | 144.610  | LOC_Os09g06530.1 |
| DG <sub>HPU</sub> | Os036733_01 | S2 | 0.745  | 0.000  | P | 201.956  | P | 338.501  | P | 374.698  | LOC_Os08g01660.2 |
| DG <sub>HPU</sub> | Os036767_01 | S2 | -0.849 | 0.000  | P | 417.553  | P | 231.838  | P | 306.868  | LOC_Os07g09660.1 |
| DG <sub>HPU</sub> | Os036864_01 | S2 | 0.000  | -0.817 | P | 1046.408 | P | 742.605  | P | 1308.673 | LOC_Os01g23750.1 |
| DG <sub>HPU</sub> | Os037049_01 | S2 | -0.878 | -0.709 | P | 1016.752 | P | 553.388  | P | 904.318  | LOC_Os08g17980.1 |
| DG <sub>HPU</sub> | Os037202_01 | S2 | -0.899 | 0.000  | P | 1119.193 | P | 600.322  | P | 628.191  | LOC_Os10g38495.1 |
| DG <sub>HPU</sub> | Os037509_01 | S2 | 0.785  | 10.000 | P | 155.876  | P | 268.679  | A | 104.006  | LOC_Os05g22600.1 |
| DG <sub>HPU</sub> | Os037607_01 | S2 | -0.877 | 0.000  | P | 552.665  | P | 300.822  | P | 338.883  | LOC_Os01g02680.1 |
| DG <sub>HPU</sub> | Os037690_01 | S2 | 0.775  | 10.000 | P | 98.024   | P | 167.759  | A | 78.760   | LOC_Os01g19350.1 |
| DG <sub>HPU</sub> | Os037792_01 | S2 | -0.928 | 10.000 | P | 315.275  | P | 165.692  | A | 58.692   | LOC_Os07g35860.1 |
| DG <sub>HPU</sub> | Os037993_01 | S2 | 0.000  | 0.906  | P | 349.021  | P | 327.921  | P | 175.011  | LOC_Os05g28640.1 |
| DG <sub>HPU</sub> | Os038123_01 | S2 | -1.281 | 10.000 | P | 515.129  | P | 211.925  | A | 9.141    | LOC_Os09g09630.1 |
| DG <sub>HPU</sub> | Os038136_01 | S2 | 0.841  | 0.000  | P | 274.441  | P | 491.545  | P | 445.410  | LOC_Os08g14990.1 |
| DG <sub>HPU</sub> | Os038579_01 | S2 | -1.045 | 0.000  | P | 436.708  | P | 211.632  | P | 282.973  | LOC_Os12g40170.1 |
| DG <sub>HPU</sub> | Os038695_01 | S2 | 0.797  | 0.000  | P | 493.234  | P | 857.232  | P | 687.939  | -                |
| DG <sub>HPU</sub> | Os039593_01 | S2 | -0.837 | 0.000  | P | 1998.154 | P | 1118.561 | P | 866.439  | -                |



|                   |             |    |        |        |   |           |   |           |   |           |                  |
|-------------------|-------------|----|--------|--------|---|-----------|---|-----------|---|-----------|------------------|
| DG <sub>HPU</sub> | Os040088_01 | S2 | 0.000  | -0.759 | P | 217.941   | P | 189.752   | P | 321.178   | -                |
| DG <sub>HPU</sub> | Os040110_01 | S2 | -1.021 | 0.000  | P | 551.880   | P | 271.980   | P | 248.625   | LOC_Os04g27840.1 |
| DG <sub>HPU</sub> | Os040132_01 | S2 | 0.000  | -0.666 | P | 797.227   | P | 632.073   | P | 1002.622  | LOC_Os08g37030.1 |
| DG <sub>HPU</sub> | Os040171_01 | S2 | 0.802  | 0.000  | P | 148.845   | P | 259.570   | P | 259.007   | -                |
| DG <sub>HPU</sub> | Os040714_01 | S2 | -0.815 | 10.000 | P | 561.669   | P | 319.271   | A | 102.909   | LOC_Os06g33660.1 |
| DG <sub>HPU</sub> | Os041351_01 | S2 | -0.872 | 0.000  | P | 742.121   | P | 405.618   | P | 325.169   | LOC_Os12g16650.1 |
| DG <sub>HPU</sub> | Os041364_01 | S2 | -0.861 | 0.000  | P | 549.751   | P | 302.748   | P | 386.514   | -                |
| DG <sub>HPU</sub> | Os041408_01 | S2 | 0.000  | 0.992  | P | 210.406   | P | 201.597   | P | 101.327   | LOC_Os01g41160.1 |
| DG <sub>HPU</sub> | Os041424_01 | S2 | -0.809 | 10.000 | P | 261.610   | P | 149.290   | A | 18.419    | LOC_Os08g26820.1 |
| DG <sub>HPU</sub> | Os042015_01 | S2 | -0.844 | 0.000  | P | 1268.138  | P | 706.296   | P | 924.909   | -                |
| DG <sub>HPU</sub> | Os042347_01 | S2 | -0.836 | 0.000  | P | 628.167   | P | 351.815   | P | 316.503   | -                |
| DG <sub>HPU</sub> | Os042441_01 | S2 | -0.789 | 0.000  | P | 898.765   | P | 520.197   | P | 484.209   | LOC_Os06g13800.1 |
| DG <sub>HPU</sub> | Os042950_01 | S2 | 0.989  | 0.873  | P | 116.107   | P | 230.511   | P | 125.895   | -                |
| DG <sub>HPU</sub> | Os042951_01 | S2 | 0.809  | 0.000  | P | 376.921   | P | 660.391   | P | 433.044   | -                |
| DG <sub>HPU</sub> | Os043043_01 | S2 | 0.816  | 0.000  | P | 322.436   | P | 567.758   | P | 593.121   | LOC_Os07g08520.1 |
| DG <sub>HPU</sub> | Os043595_01 | S2 | 0.000  | 1.080  | P | 226.936   | P | 264.578   | P | 125.187   | LOC_Os02g27330.1 |
| DG <sub>HPU</sub> | Os043773_01 | S2 | -0.990 | 0.000  | P | 1681.989  | P | 847.011   | P | 711.481   | LOC_Os08g09410.1 |
| DG <sub>HPU</sub> | Os043814_01 | S2 | -0.829 | 0.000  | P | 966.644   | P | 544.028   | P | 610.219   | LOC_Os02g32180.1 |
| DG <sub>HPU</sub> | Os044259_01 | S2 | 0.000  | -0.769 | P | 1429.533  | P | 1305.519  | P | 2224.545  | LOC_Os05g36370.1 |
| DG <sub>HPU</sub> | Os044491_01 | S2 | 0.000  | 0.827  | P | 254.514   | P | 223.080   | P | 125.748   | LOC_Os12g10350.1 |
| DG <sub>HPU</sub> | Os044883_01 | S2 | 0.000  | 0.830  | P | 354.854   | P | 279.012   | P | 156.919   | -                |
| DG <sub>HPU</sub> | Os045006_01 | S2 | 0.000  | -0.622 | P | 171.558   | P | 210.757   | P | 324.263   | LOC_Os08g41520.1 |
| DG <sub>HPU</sub> | Os045013_01 | S2 | 0.000  | 0.919  | P | 1835.896  | P | 1459.885  | P | 772.293   | LOC_Os08g31720.1 |
| DG <sub>HPU</sub> | Os045192_01 | S2 | -1.120 | 0.000  | P | 459.613   | P | 211.476   | P | 216.337   | LOC_Os06g23380.1 |
| DG <sub>HPU</sub> | Os045210_01 | S2 | 0.000  | 0.989  | P | 268.561   | P | 235.933   | P | 118.868   | -                |
| DG <sub>HPU</sub> | Os045664_01 | S2 | -0.788 | 0.000  | P | 614.552   | P | 355.909   | P | 272.802   | LOC_Os02g25890.1 |
| DG <sub>HPU</sub> | Os046234_01 | S2 | 0.000  | -0.798 | P | 14946.256 | P | 16210.029 | P | 28192.768 | LOC_Os01g74570.1 |
| DG <sub>HPU</sub> | Os046281_01 | S2 | -0.964 | 0.000  | P | 482.829   | P | 247.485   | P | 269.392   | LOC_Os10g38640.1 |
| DG <sub>HPU</sub> | Os046309_01 | S2 | -0.862 | 0.000  | P | 589.637   | P | 324.436   | P | 288.636   | LOC_Os08g06070.1 |
| DG <sub>HPU</sub> | Os047011_01 | S2 | 0.935  | 0.870  | P | 443.845   | P | 848.315   | P | 464.307   | LOC_Os01g37000.1 |
| DG <sub>HPU</sub> | Os047423_01 | S2 | 0.000  | 0.846  | P | 360.983   | P | 366.592   | P | 203.974   | LOC_Os11g46880.1 |

|                   |             |    |        |        |   |           |   |           |   |           |                  |
|-------------------|-------------|----|--------|--------|---|-----------|---|-----------|---|-----------|------------------|
| DG <sub>HPU</sub> | Os047670_01 | S2 | 0.000  | -0.943 | P | 688.498   | P | 458.639   | P | 881.774   | LOC_Os10g01800.1 |
| DG <sub>HPU</sub> | Os048024_01 | S2 | -0.834 | 0.000  | P | 255.047   | P | 143.122   | P | 200.709   | LOC_Os04g05750.1 |
| DG <sub>HPU</sub> | Os048156_01 | S2 | 0.000  | -0.904 | P | 563.252   | P | 344.599   | P | 644.734   | LOC_Os07g03508.1 |
| DG <sub>HPU</sub> | Os048275_01 | S2 | 1.170  | 0.000  | P | 136.548   | P | 307.263   | P | 253.427   | LOC_Os07g48190.1 |
| DG <sub>HPU</sub> | Os048365_01 | S2 | 0.727  | 0.000  | P | 139.788   | P | 231.364   | P | 193.251   | LOC_Os09g19310.1 |
| DG <sub>HPU</sub> | Os048488_01 | S2 | 0.000  | -0.701 | P | 797.895   | P | 624.606   | P | 1015.648  | LOC_Os12g39690.1 |
| DG <sub>HPU</sub> | Os048888_01 | S2 | 0.824  | 10.000 | P | 96.242    | P | 170.323   | A | 82.961    | -                |
| DG <sub>HPU</sub> | Os049283_01 | S2 | -0.798 | 0.000  | P | 372.941   | P | 214.437   | P | 233.843   | LOC_Os08g38450.1 |
| DG <sub>HPU</sub> | Os049472_01 | S2 | 0.000  | 0.977  | P | 721.625   | P | 744.318   | P | 378.231   | LOC_Os10g39080.1 |
| DG <sub>HPU</sub> | Os049499_01 | S2 | -0.913 | 0.000  | P | 554.984   | P | 294.670   | P | 233.940   | LOC_Os05g27000.1 |
| DG <sub>HPU</sub> | Os049664_01 | S2 | 0.793  | 0.000  | P | 150.286   | P | 260.389   | P | 234.376   | LOC_Os08g08490.1 |
| DG <sub>HPU</sub> | Os050024_01 | S2 | 0.000  | 0.893  | P | 1019.487  | P | 854.664   | P | 460.247   | LOC_Os01g65950.1 |
| DG <sub>HPU</sub> | Os050288_01 | S2 | 0.000  | 0.870  | P | 335.886   | P | 323.225   | P | 176.800   | -                |
| DG <sub>HPU</sub> | Os050644_01 | S2 | -0.900 | 0.000  | P | 460.088   | P | 246.557   | P | 212.501   | LOC_Os11g32630.1 |
| DG <sub>HPU</sub> | Os050700_01 | S2 | -0.969 | -0.894 | P | 53337.980 | P | 27255.989 | P | 50638.030 | LOC_Os10g21280.1 |
| DG <sub>HPU</sub> | Os051476_01 | S2 | 0.000  | -0.925 | P | 5553.676  | P | 5396.166  | P | 10244.057 | LOC_Os08g01370.1 |
| DG <sub>HPU</sub> | Os051763_01 | S2 | -0.918 | 0.000  | P | 418.489   | P | 221.438   | P | 220.331   | LOC_Os11g27100.1 |
| DG <sub>HPU</sub> | Os051947_01 | S2 | 0.000  | 0.823  | P | 551.324   | P | 419.783   | P | 237.327   | LOC_Os05g25850.1 |
| DG <sub>HPU</sub> | Os052021_01 | S2 | 0.000  | 0.902  | P | 667.280   | P | 656.704   | P | 351.486   | LOC_Os12g05430.1 |
| DG <sub>HPU</sub> | Os052056_01 | S2 | -0.826 | 0.000  | P | 781.728   | P | 441.081   | P | 398.182   | LOC_Os10g42540.1 |
| DG <sub>HPU</sub> | Os052072_01 | S2 | -0.966 | 0.000  | P | 636.600   | P | 325.942   | P | 283.226   | LOC_Os12g26290.2 |
| DG <sub>HPU</sub> | Os052153_01 | S2 | 0.000  | 0.867  | P | 242.504   | P | 301.741   | P | 165.440   | LOC_Os03g14530.1 |
| DG <sub>HPU</sub> | Os052312_01 | S2 | 0.749  | 0.000  | P | 122.954   | P | 206.708   | P | 202.431   | LOC_Os07g09060.2 |
| DG <sub>HPU</sub> | Os052326_01 | S2 | 0.777  | 0.000  | P | 166.992   | P | 286.064   | P | 321.880   | LOC_Os02g01920.1 |
| DG <sub>HPU</sub> | Os052354_01 | S2 | -1.087 | -0.675 | P | 806.767   | P | 379.812   | P | 606.214   | LOC_Os04g46830.1 |
| DG <sub>HPU</sub> | Os052399_01 | S2 | 0.000  | -0.696 | P | 433.456   | P | 310.070   | P | 502.489   | LOC_Os12g43370.2 |
| DG <sub>HPU</sub> | Os052477_01 | S2 | 0.000  | 0.890  | P | 160.233   | P | 195.597   | P | 105.524   | LOC_Os01g65330.1 |
| DG <sub>HPU</sub> | Os052508_01 | S2 | 0.000  | 0.844  | P | 299.616   | P | 270.709   | P | 150.818   | LOC_Os10g42860.1 |
| DG <sub>HPU</sub> | Os052844_01 | S2 | -1.684 | 0.000  | P | 1649.071  | P | 513.128   | P | 776.072   | -                |
| DG <sub>HPU</sub> | Os052934_01 | S2 | 0.751  | 0.854  | P | 650.082   | P | 1094.197  | P | 605.410   | LOC_Os06g16640.1 |
| DG <sub>HPU</sub> | Os052941_01 | S2 | -0.803 | 0.000  | P | 512.053   | P | 293.548   | P | 258.644   | LOC_Os02g37320.1 |

|                   |               |          |                  |        |   |                  |   |              |   |           |                  |         |
|-------------------|---------------|----------|------------------|--------|---|------------------|---|--------------|---|-----------|------------------|---------|
| DG <sub>HPU</sub> | Os053281_01   | S2       | 0.000            | -0.996 | P | 1083.047         | P | 709.916      | P | 1416.030  | LOC_Os01g18440.1 |         |
| DG <sub>HPU</sub> | Os053469_01   | S2       | 0.000            | -0.727 | P | 19914.694        | P | 19566.080    | P | 32390.654 | LOC_Os10g41430.1 |         |
| DG <sub>HPU</sub> | Os053660_01   | S2       | -0.827           | 0.000  | P | 382.231          | P | 215.405      | P | 232.050   | LOC_Os10g41640.1 |         |
| DG <sub>HPU</sub> | Os053800_01   | S2       | -0.866           | 0.000  | P | 1004.583         | P | 551.204      | P | 584.173   | LOC_Os01g08380.1 |         |
| DG <sub>HPU</sub> | Os053922_01   | S2       | -0.969           | 0.000  | P | 540.014          | P | 275.937      | P | 368.737   | LOC_Os08g36500.1 |         |
| DG <sub>HPU</sub> | Os053976_01   | S2       | -1.024           | 10.000 | P | 300.520          | P | 147.818      | A | 97.610    | LOC_Os01g02560.1 |         |
| DG <sub>HPU</sub> | Os054193_01   | S2       | 0.000            | 0.866  | P | 603.251          | P | 480.057      | P | 263.339   | LOC_Os01g15800.1 |         |
| DG <sub>HPU</sub> | Os054267_01   | S2       | -0.939           | 0.000  | P | 778.142          | P | 405.888      | P | 441.729   | -                |         |
| DG <sub>HPU</sub> | Os054395_01   | S2       | -0.806           | 0.000  | P | 1076.635         | P | 615.762      | P | 590.116   | LOC_Os02g41650.2 |         |
| DG <sub>HPU</sub> | Os054493_01   | S2       | 0.722            | 0.000  | P | 358.962          | P | 592.074      | P | 455.440   | LOC_Os03g22810.1 |         |
| DG <sub>HPU</sub> | Os054550_01   | S2       | 0.000            | -0.681 | P | 805.746          | P | 748.125      | P | 1199.363  | LOC_Os06g04070.1 |         |
| DG <sub>HPU</sub> | Os054583_01   | S2       | 0.000            | 0.843  | P | 7281.740         | P | 6589.564     | P | 3674.030  | LOC_Os06g04270.1 |         |
| DG <sub>HPU</sub> | Os054723_01   | S2       | 0.725            | 10.000 | P | 114.465          | P | 189.139      | A | 89.327    | LOC_Os04g49670.1 |         |
| DG <sub>HPU</sub> | Os054731_01   | S2       | -0.988           | -0.785 | P | 460.951          | P | 232.375      | P | 400.278   | -                |         |
| DG <sub>HPU</sub> | Os054741_01   | S2       | 1.131            | 10.000 | P | 107.618          | P | 235.642      | A | 35.326    | -                |         |
| DG <sub>HPU</sub> | Os054785_01   | S2       | -1.137           | -0.784 | P | 428.921          | P | 195.003      | P | 335.873   | LOC_Os01g09220.1 |         |
| DG <sub>HPU</sub> | Os054838_01   | S2       | 0.889            | 10.000 | P | 103.773          | P | 192.216      | A | 61.783    | LOC_Os03g13800.1 |         |
| DG <sub>HPU</sub> | Os055053_01   | S2       | 0.000            | 0.930  | P | 409.150          | P | 392.210      | P | 205.837   | LOC_Os01g37630.1 |         |
| DG <sub>HPU</sub> | Os055124_01   | S2       | 0.000            | 1.113  | P | 516.528          | P | 616.256      | P | 284.913   | LOC_Os12g36890.1 |         |
| DG <sub>HPU</sub> | Os055198_01   | S2       | 0.739            | 0.000  | P | 164.759          | P | 275.046      | P | 297.495   | LOC_Os04g46980.1 |         |
| DG <sub>HPU</sub> | Os055427_01   | S2       | 0.723            | 0.000  | P | 116.173          | P | 191.817      | P | 157.358   | LOC_Os05g08480.1 |         |
| DG <sub>HPU</sub> | Os055745_01   | S2       | 0.000            | 0.946  | P | 222.938          | P | 204.576      | P | 106.169   | LOC_Os07g41090.2 |         |
| DG <sub>HPU</sub> | Os056132_01   | S2       | 1.274            | 0.000  | P | 117.990          | P | 285.329      | P | 232.343   | LOC_Os05g43040.1 |         |
| DG <sub>HPU</sub> | Os056446_01   | S2       | 0.000            | 1.065  | P | 916.288          | P | 1349.823     | P | 645.300   | LOC_Os01g74160.1 |         |
| DG <sub>HPU</sub> | Os056918_02   | S2       | -0.954           | 0.000  | P | 8068.496         | P | 4165.016     | P | 4437.342  | LOC_Os01g13690.1 |         |
| DG <sub>HPU</sub> | Os056921_02   | S2       | 0.000            | -0.642 | P | 258.384          | P | 229.466      | P | 357.960   | -                |         |
| DG <sub>HPU</sub> | Os057173_02   | S2       | 10.000           | -1.408 | A | 57.927           | P | 425.067      | P | 1128.118  | LOC_Os12g37260.1 |         |
| DG <sub>HPU</sub> | Os057369_01   | S2       | 0.000            | -0.740 | P | 2801.869         | P | 1826.688     | P | 3051.601  | LOC_Os03g50310.1 |         |
| DG <sub>HPU</sub> | Os057565_02   | S2       | 0.965            | 0.000  | P | 195.529          | P | 381.790      | P | 387.836   | LOC_Os01g27940.1 |         |
| DG <sub>HPU</sub> | GeneID        | S3       | log2(Ratio(L/9)) |        |   | log2(Ratio(L/P)) |   | Bo_9311.flag |   | Bo_9311   | Bo_LYP9.flag     | Bo_LYP9 |
|                   | Bo_PA64s.flag | Bo_PA64s |                  |        |   | TIGR5.id         |   |              |   |           |                  |         |

|                   |             |    |        |        |   |           |   |           |   |           |                  |
|-------------------|-------------|----|--------|--------|---|-----------|---|-----------|---|-----------|------------------|
| DG <sub>HPU</sub> | Os000012_01 | S3 | 1.153  | 0.000  | P | 347.641   | P | 773.134   | P | 641.778   | LOC_Os02g45180.1 |
| DG <sub>HPU</sub> | Os000040_01 | S3 | 1.312  | 0.000  | P | 1041.106  | P | 2584.122  | P | 2465.486  | LOC_Os01g65440.1 |
| DG <sub>HPU</sub> | Os000050_01 | S3 | 0.000  | -1.170 | P | 178.570   | P | 205.076   | P | 461.309   | LOC_Os01g28030.1 |
| DG <sub>HPU</sub> | Os000054_01 | S3 | 0.000  | -0.987 | P | 170.402   | P | 237.620   | P | 470.889   | LOC_Os06g45300.2 |
| DG <sub>HPU</sub> | Os000056_01 | S3 | 0.000  | -1.207 | P | 152.641   | P | 178.896   | P | 413.092   | LOC_Os11g16390.3 |
| DG <sub>HPU</sub> | Os000128_01 | S3 | 1.737  | 0.000  | P | 354.112   | P | 1180.493  | P | 920.163   | LOC_Os06g12740.1 |
| DG <sub>HPU</sub> | Os000168_01 | S3 | 0.000  | -1.080 | P | 248.580   | P | 244.850   | P | 517.515   | LOC_Os07g15959.1 |
| DG <sub>HPU</sub> | Os000269_01 | S3 | 0.000  | -1.155 | P | 133.708   | P | 175.104   | P | 389.836   | LOC_Os12g31440.1 |
| DG <sub>HPU</sub> | Os000406_01 | S3 | 1.122  | 0.000  | P | 261.283   | P | 568.577   | P | 766.799   | LOC_Os07g10720.2 |
| DG <sub>HPU</sub> | Os000431_01 | S3 | 1.361  | 1.409  | P | 11570.976 | P | 29716.642 | P | 11188.559 | LOC_Os01g68300.1 |
| DG <sub>HPU</sub> | Os000575_01 | S3 | 1.133  | 0.000  | P | 290.970   | P | 638.277   | P | 592.324   | LOC_Os11g20160.1 |
| DG <sub>HPU</sub> | Os000827_01 | S3 | 0.000  | -1.136 | P | 168.669   | P | 234.233   | P | 514.624   | LOC_Os03g31730.1 |
| DG <sub>HPU</sub> | Os000842_01 | S3 | 1.613  | 0.000  | P | 5454.425  | P | 16685.998 | P | 11623.969 | LOC_Os12g33130.1 |
| DG <sub>HPU</sub> | Os000894_01 | S3 | 0.000  | -0.982 | P | 254.689   | P | 183.018   | P | 361.545   | LOC_Os02g08010.1 |
| DG <sub>HPU</sub> | Os000896_01 | S3 | 1.274  | 0.000  | P | 171.832   | P | 415.665   | P | 512.755   | LOC_Os01g67220.2 |
| DG <sub>HPU</sub> | Os000917_01 | S3 | 0.000  | -1.714 | P | 163.561   | P | 144.685   | P | 474.774   | LOC_Os05g23430.1 |
| DG <sub>HPU</sub> | Os000928_01 | S3 | 0.000  | 1.525  | P | 328.191   | P | 362.648   | P | 126.024   | LOC_Os05g05800.1 |
| DG <sub>HPU</sub> | Os001183_01 | S3 | 1.449  | 0.000  | P | 174.221   | P | 475.493   | P | 503.144   | LOC_Os11g13930.1 |
| DG <sub>HPU</sub> | Os001213_01 | S3 | 0.000  | 1.545  | P | 1204.312  | P | 1025.213  | P | 351.413   | LOC_Os05g14860.1 |
| DG <sub>HPU</sub> | Os001215_01 | S3 | 0.000  | -0.969 | P | 294.285   | P | 335.238   | P | 655.995   | LOC_Os03g55450.2 |
| DG <sub>HPU</sub> | Os001260_01 | S3 | 0.000  | -1.205 | P | 132.230   | P | 138.841   | P | 320.027   | LOC_Os06g15910.1 |
| DG <sub>HPU</sub> | Os001286_01 | S3 | 0.000  | -1.596 | P | 170.904   | P | 168.545   | P | 509.365   | LOC_Os08g06520.1 |
| DG <sub>HPU</sub> | Os001385_01 | S3 | -0.937 | 0.000  | P | 2197.516  | P | 1147.564  | P | 936.036   | LOC_Os02g05470.1 |
| DG <sub>HPU</sub> | Os001472_01 | S3 | 1.121  | 0.000  | P | 193.059   | P | 419.890   | P | 514.837   | LOC_Os09g10760.1 |
| DG <sub>HPU</sub> | Os001486_01 | S3 | 0.000  | -0.964 | P | 189.404   | P | 248.519   | P | 484.949   | LOC_Os03g10140.1 |
| DG <sub>HPU</sub> | Os001606_01 | S3 | 1.277  | 0.000  | P | 1316.521  | P | 3190.772  | P | 3633.216  | LOC_Os06g44450.1 |
| DG <sub>HPU</sub> | Os001636_01 | S3 | 1.124  | 0.000  | P | 121.075   | P | 263.849   | P | 317.822   | LOC_Os07g04020.1 |
| DG <sub>HPU</sub> | Os001722_01 | S3 | 1.175  | 0.000  | P | 164.551   | P | 371.462   | P | 416.580   | LOC_Os07g10256.1 |
| DG <sub>HPU</sub> | Os001727_01 | S3 | 0.000  | -1.039 | P | 169.823   | P | 150.717   | P | 309.646   | LOC_Os03g44500.1 |
| DG <sub>HPU</sub> | Os001770_01 | S3 | 1.166  | 0.000  | P | 231.796   | P | 519.987   | P | 577.718   | LOC_Os03g48920.1 |
| DG <sub>HPU</sub> | Os001813_01 | S3 | 1.236  | 0.000  | P | 146.778   | P | 345.635   | P | 431.757   | LOC_Os05g04850.1 |

|                   |             |    |        |        |   |          |   |           |   |          |                  |
|-------------------|-------------|----|--------|--------|---|----------|---|-----------|---|----------|------------------|
| DG <sub>HPU</sub> | Os001957_01 | S3 | -1.076 | 0.000  | P | 1143.040 | P | 542.011   | P | 391.921  | LOC_Os07g38230.1 |
| DG <sub>HPU</sub> | Os002166_02 | S3 | 1.371  | 0.000  | P | 327.691  | P | 847.404   | P | 788.214  | -                |
| DG <sub>HPU</sub> | Os002369_01 | S3 | 0.000  | -1.032 | P | 219.367  | P | 224.900   | P | 459.876  | -                |
| DG <sub>HPU</sub> | Os002390_01 | S3 | 2.278  | 1.933  | P | 2660.653 | P | 12900.030 | P | 3378.061 | LOC_Os07g05360.1 |
| DG <sub>HPU</sub> | Os002448_01 | S3 | 10.000 | -1.187 | A | 98.143   | P | 150.181   | P | 341.842  | LOC_Os02g16730.1 |
| DG <sub>HPU</sub> | Os002532_01 | S3 | 1.240  | 0.000  | P | 104.366  | P | 246.508   | P | 294.647  | LOC_Os03g60260.1 |
| DG <sub>HPU</sub> | Os002671_01 | S3 | 0.000  | -1.227 | P | 149.378  | P | 190.402   | P | 445.665  | LOC_Os03g51440.1 |
| DG <sub>HPU</sub> | Os002812_01 | S3 | 10.000 | -1.079 | A | 110.888  | P | 171.269   | P | 361.812  | LOC_Os02g53210.3 |
| DG <sub>HPU</sub> | Os002898_01 | S3 | 1.111  | 0.000  | P | 188.861  | P | 407.903   | P | 444.077  | LOC_Os11g11330.1 |
| DG <sub>HPU</sub> | Os003424_01 | S3 | 1.394  | 0.000  | P | 112.845  | P | 296.609   | P | 297.913  | LOC_Os12g29550.1 |
| DG <sub>HPU</sub> | Os003956_02 | S3 | 0.000  | 1.564  | P | 196.066  | P | 314.892   | P | 106.486  | -                |
| DG <sub>HPU</sub> | Os004343_01 | S3 | 0.000  | 1.447  | P | 722.710  | P | 586.480   | P | 215.173  | LOC_Os06g14030.1 |
| DG <sub>HPU</sub> | Os004399_01 | S3 | -2.382 | 10.000 | P | 2786.725 | P | 534.473   | A | 57.518   | LOC_Os02g40180.1 |
| DG <sub>HPU</sub> | Os005103_01 | S3 | 1.333  | 0.000  | P | 101.835  | P | 256.596   | P | 269.308  | LOC_Os09g18159.1 |
| DG <sub>HPU</sub> | Os006161_02 | S3 | 0.000  | -0.990 | P | 212.184  | P | 252.184   | P | 500.750  | -                |
| DG <sub>HPU</sub> | Os006546_02 | S3 | 1.430  | 0.000  | P | 94.416   | P | 254.477   | P | 235.018  | -                |
| DG <sub>HPU</sub> | Os006663_01 | S3 | -1.346 | 0.000  | P | 524.932  | P | 206.551   | P | 182.697  | -                |
| DG <sub>HPU</sub> | Os008106_01 | S3 | 10.000 | -1.369 | A | 84.139   | P | 150.344   | P | 388.348  | -                |
| DG <sub>HPU</sub> | Os008192_01 | S3 | 1.470  | 0.000  | P | 187.095  | P | 518.454   | P | 459.511  | LOC_Os09g24620.1 |
| DG <sub>HPU</sub> | Os008368_01 | S3 | 1.445  | 0.000  | P | 104.455  | P | 284.306   | P | 154.348  | LOC_Os09g14680.1 |
| DG <sub>HPU</sub> | Os008439_01 | S3 | 1.283  | 0.000  | P | 151.878  | P | 369.680   | P | 407.032  | LOC_Os07g44740.1 |
| DG <sub>HPU</sub> | Os008441_01 | S3 | 0.000  | 1.289  | P | 683.207  | P | 623.112   | P | 254.974  | LOC_Os03g49190.1 |
| DG <sub>HPU</sub> | Os008450_01 | S3 | 1.434  | 0.000  | P | 610.488  | P | 1649.626  | P | 1003.716 | LOC_Os01g67980.1 |
| DG <sub>HPU</sub> | Os008472_01 | S3 | -1.115 | 0.000  | P | 611.741  | P | 282.446   | P | 271.912  | LOC_Os07g08860.1 |
| DG <sub>HPU</sub> | Os008557_01 | S3 | 10.000 | -1.302 | A | 58.744   | P | 172.656   | P | 425.764  | LOC_Os07g29610.1 |
| DG <sub>HPU</sub> | Os008621_01 | S3 | 1.289  | 0.000  | P | 138.935  | P | 339.584   | P | 327.278  | LOC_Os02g30624.2 |
| DG <sub>HPU</sub> | Os008639_01 | S3 | 1.114  | 0.000  | P | 105.650  | P | 228.606   | P | 212.329  | LOC_Os01g50370.1 |
| DG <sub>HPU</sub> | Os008640_01 | S3 | -1.109 | 0.000  | P | 824.225  | P | 382.060   | P | 268.669  | LOC_Os02g32814.1 |
| DG <sub>HPU</sub> | Os008685_01 | S3 | -0.943 | 0.000  | P | 1970.092 | P | 1024.890  | P | 675.861  | -                |
| DG <sub>HPU</sub> | Os008702_01 | S3 | 1.197  | 0.000  | P | 93.696   | P | 214.791   | P | 219.714  | LOC_Os06g11430.1 |
| DG <sub>HPU</sub> | Os008765_01 | S3 | 1.154  | 0.000  | P | 160.116  | P | 356.327   | P | 357.811  | LOC_Os09g20660.1 |

|                   |             |    |        |        |   |          |   |          |   |          |                  |
|-------------------|-------------|----|--------|--------|---|----------|---|----------|---|----------|------------------|
| DG <sub>HPU</sub> | Os008778_01 | S3 | -1.603 | 0.000  | P | 3903.760 | P | 1284.702 | P | 1138.161 | LOC_Os05g31000.1 |
| DG <sub>HPU</sub> | Os008849_01 | S3 | 1.152  | 0.000  | P | 185.234  | P | 411.740  | P | 418.975  | LOC_Os06g44374.1 |
| DG <sub>HPU</sub> | Os008896_01 | S3 | 0.000  | -1.153 | P | 378.264  | P | 326.358  | P | 725.925  | LOC_Os04g51520.1 |
| DG <sub>HPU</sub> | Os008970_01 | S3 | 1.241  | 0.000  | P | 111.480  | P | 263.582  | P | 320.611  | LOC_Os09g20900.1 |
| DG <sub>HPU</sub> | Os009036_01 | S3 | -0.962 | 0.000  | P | 7104.860 | P | 3646.334 | P | 2848.731 | LOC_Os12g30540.1 |
| DG <sub>HPU</sub> | Os009088_01 | S3 | 1.531  | 1.649  | P | 181.570  | P | 524.803  | P | 167.339  | LOC_Os05g12400.1 |
| DG <sub>HPU</sub> | Os009099_01 | S3 | 1.248  | 0.000  | P | 233.336  | P | 554.067  | P | 487.347  | LOC_Os06g39912.1 |
| DG <sub>HPU</sub> | Os009117_01 | S3 | 1.422  | 0.000  | P | 2719.474 | P | 7288.976 | P | 7736.244 | LOC_Os12g02320.1 |
| DG <sub>HPU</sub> | Os009123_01 | S3 | 1.257  | 0.000  | P | 115.609  | P | 276.232  | P | 320.696  | LOC_Os02g32980.1 |
| DG <sub>HPU</sub> | Os009330_01 | S3 | 0.000  | -1.244 | P | 129.081  | P | 155.176  | P | 367.525  | LOC_Os01g07730.1 |
| DG <sub>HPU</sub> | Os009504_01 | S3 | 0.000  | -1.455 | P | 183.949  | P | 177.133  | P | 485.753  | LOC_Os02g03410.1 |
| DG <sub>HPU</sub> | Os009518_01 | S3 | 1.179  | 0.000  | P | 2836.484 | P | 6423.194 | P | 7246.267 | LOC_Os01g73250.1 |
| DG <sub>HPU</sub> | Os009562_01 | S3 | 1.202  | 0.000  | P | 778.059  | P | 1789.457 | P | 2298.158 | LOC_Os03g22270.1 |
| DG <sub>HPU</sub> | Os009747_01 | S3 | -0.972 | 0.000  | P | 1337.972 | P | 681.947  | P | 680.313  | LOC_Os05g45050.1 |
| DG <sub>HPU</sub> | Os009753_01 | S3 | 0.000  | 1.446  | P | 381.780  | P | 369.577  | P | 135.678  | -                |
| DG <sub>HPU</sub> | Os009786_01 | S3 | -1.014 | 0.000  | P | 789.224  | P | 390.726  | P | 365.486  | LOC_Os03g24020.1 |
| DG <sub>HPU</sub> | Os009852_01 | S3 | 1.126  | 0.000  | P | 188.289  | P | 410.957  | P | 474.562  | LOC_Os03g38020.1 |
| DG <sub>HPU</sub> | Os009869_01 | S3 | 1.145  | 0.000  | P | 146.035  | P | 322.929  | P | 425.232  | LOC_Os04g20230.1 |
| DG <sub>HPU</sub> | Os009907_01 | S3 | 0.000  | 1.291  | P | 287.280  | P | 227.452  | P | 92.939   | LOC_Os03g02690.1 |
| DG <sub>HPU</sub> | Os010022_01 | S3 | 0.000  | 1.337  | P | 560.321  | P | 427.046  | P | 169.041  | LOC_Os08g05550.1 |
| DG <sub>HPU</sub> | Os010213_01 | S3 | 1.659  | 1.722  | P | 130.553  | P | 412.145  | P | 124.900  | LOC_Os08g07690.1 |
| DG <sub>HPU</sub> | Os010228_01 | S3 | 0.000  | 1.562  | P | 397.625  | P | 344.819  | P | 116.823  | -                |
| DG <sub>HPU</sub> | Os010273_01 | S3 | 0.000  | -1.139 | P | 544.489  | P | 352.741  | P | 776.630  | LOC_Os04g30420.1 |
| DG <sub>HPU</sub> | Os010313_01 | S3 | -1.400 | 0.000  | P | 634.947  | P | 240.638  | P | 214.772  | LOC_Os08g36920.1 |
| DG <sub>HPU</sub> | Os011258_01 | S3 | 0.000  | 1.624  | P | 1004.867 | P | 981.938  | P | 318.678  | LOC_Os06g49740.1 |
| DG <sub>HPU</sub> | Os011344_01 | S3 | 0.000  | 1.538  | P | 599.377  | P | 650.646  | P | 224.055  | -                |
| DG <sub>HPU</sub> | Os011371_01 | S3 | 0.000  | 1.622  | P | 475.774  | P | 500.809  | P | 162.749  | LOC_Os07g01920.1 |
| DG <sub>HPU</sub> | Os011601_01 | S3 | -0.976 | 0.000  | P | 686.174  | P | 348.751  | P | 214.918  | LOC_Os08g41990.1 |
| DG <sub>HPU</sub> | Os011651_01 | S3 | 0.000  | 1.418  | P | 867.756  | P | 654.770  | P | 245.041  | LOC_Os09g13570.1 |
| DG <sub>HPU</sub> | Os011669_01 | S3 | 0.000  | 1.369  | P | 414.566  | P | 401.331  | P | 155.401  | LOC_Os04g36054.1 |
| DG <sub>HPU</sub> | Os011759_01 | S3 | -1.127 | 0.000  | P | 431.858  | P | 197.752  | P | 174.904  | LOC_Os04g41920.2 |

|                   |             |    |        |        |   |          |   |          |   |          |                  |
|-------------------|-------------|----|--------|--------|---|----------|---|----------|---|----------|------------------|
| DG <sub>HPU</sub> | Os011816_01 | S3 | 0.000  | 2.456  | P | 1044.057 | P | 2117.591 | P | 386.028  | -                |
| DG <sub>HPU</sub> | Os011858_01 | S3 | 0.000  | 1.487  | P | 878.955  | P | 858.093  | P | 306.071  | LOC_Os05g33880.2 |
| DG <sub>HPU</sub> | Os011897_01 | S3 | 0.000  | -1.015 | P | 1224.785 | P | 1093.770 | P | 2210.940 | LOC_Os03g19760.2 |
| DG <sub>HPU</sub> | Os011950_01 | S3 | 0.000  | 1.463  | P | 854.105  | P | 791.295  | P | 287.075  | LOC_Os04g31070.1 |
| DG <sub>HPU</sub> | Os011979_01 | S3 | 0.000  | 1.339  | P | 604.379  | P | 647.186  | P | 255.803  | LOC_Os06g35160.1 |
| DG <sub>HPU</sub> | Os012021_01 | S3 | 0.000  | 1.320  | P | 399.095  | P | 507.811  | P | 203.453  | LOC_Os01g73000.3 |
| DG <sub>HPU</sub> | Os012028_01 | S3 | 0.000  | 1.330  | P | 6820.046 | P | 9805.662 | P | 3901.095 | LOC_Os11g47760.1 |
| DG <sub>HPU</sub> | Os012121_01 | S3 | 0.000  | 1.774  | P | 335.905  | P | 372.675  | P | 108.972  | LOC_Os12g24170.1 |
| DG <sub>HPU</sub> | Os012122_01 | S3 | 0.000  | 1.569  | P | 469.921  | P | 413.412  | P | 139.340  | LOC_Os03g22380.2 |
| DG <sub>HPU</sub> | Os012189_01 | S3 | -1.032 | 10.000 | P | 336.951  | P | 164.813  | A | 111.046  | LOC_Os05g05480.1 |
| DG <sub>HPU</sub> | Os012349_01 | S3 | -1.184 | 0.000  | P | 2443.945 | P | 1075.511 | P | 1142.773 | LOC_Os03g61220.1 |
| DG <sub>HPU</sub> | Os012350_01 | S3 | 0.000  | 1.273  | P | 355.670  | P | 312.247  | P | 129.240  | LOC_Os04g38640.1 |
| DG <sub>HPU</sub> | Os012394_01 | S3 | 0.000  | 1.484  | P | 253.854  | P | 256.297  | P | 91.636   | LOC_Os02g56740.1 |
| DG <sub>HPU</sub> | Os012428_01 | S3 | 0.000  | 1.281  | P | 252.992  | P | 195.684  | P | 80.529   | LOC_Os03g11200.1 |
| DG <sub>HPU</sub> | Os012475_01 | S3 | 0.000  | 1.659  | P | 229.119  | P | 231.840  | P | 73.422   | LOC_Os02g57820.1 |
| DG <sub>HPU</sub> | Os012491_01 | S3 | 0.000  | 1.293  | P | 522.437  | P | 504.842  | P | 206.056  | LOC_Os03g54790.1 |
| DG <sub>HPU</sub> | Os012493_01 | S3 | 0.000  | 1.527  | P | 420.684  | P | 458.468  | P | 159.051  | LOC_Os03g11720.1 |
| DG <sub>HPU</sub> | Os012632_01 | S3 | -1.146 | 0.000  | P | 421.445  | P | 190.431  | P | 156.581  | LOC_Os05g51670.1 |
| DG <sub>HPU</sub> | Os012645_01 | S3 | 0.000  | -1.378 | P | 809.827  | P | 739.389  | P | 1921.265 | LOC_Os05g41550.5 |
| DG <sub>HPU</sub> | Os012753_01 | S3 | -0.924 | 0.000  | P | 8588.591 | P | 4527.109 | P | 4115.888 | -                |
| DG <sub>HPU</sub> | Os012754_01 | S3 | -1.034 | 0.000  | P | 542.360  | P | 264.855  | P | 261.127  | LOC_Os03g45400.1 |
| DG <sub>HPU</sub> | Os012757_01 | S3 | 0.000  | 1.420  | P | 368.253  | P | 350.687  | P | 131.015  | LOC_Os02g08130.3 |
| DG <sub>HPU</sub> | Os012829_01 | S3 | -1.490 | 0.000  | P | 1159.827 | P | 412.780  | P | 428.746  | LOC_Os01g18630.1 |
| DG <sub>HPU</sub> | Os012846_01 | S3 | -1.034 | 0.000  | P | 834.186  | P | 407.306  | P | 275.459  | LOC_Os07g01214.1 |
| DG <sub>HPU</sub> | Os012851_01 | S3 | -1.098 | 0.000  | P | 760.124  | P | 355.022  | P | 298.877  | LOC_Os01g60280.1 |
| DG <sub>HPU</sub> | Os012866_01 | S3 | -0.974 | 0.000  | P | 654.631  | P | 333.336  | P | 378.160  | LOC_Os06g41990.2 |
| DG <sub>HPU</sub> | Os012876_01 | S3 | 0.000  | -1.020 | P | 1627.325 | P | 1964.890 | P | 3985.711 | LOC_Os05g50550.1 |
| DG <sub>HPU</sub> | Os012886_01 | S3 | -0.936 | 0.000  | P | 773.520  | P | 404.253  | P | 443.782  | LOC_Os03g06230.1 |
| DG <sub>HPU</sub> | Os012897_01 | S3 | 0.000  | 1.762  | P | 329.398  | P | 409.580  | P | 120.739  | LOC_Os03g04960.2 |
| DG <sub>HPU</sub> | Os013155_01 | S3 | 0.000  | 1.431  | P | 537.598  | P | 438.067  | P | 162.464  | LOC_Os10g31000.2 |
| DG <sub>HPU</sub> | Os013156_01 | S3 | 0.000  | 1.429  | P | 1336.051 | P | 1108.844 | P | 411.895  | LOC_Os03g62240.1 |

|                   |             |    |        |        |   |          |   |          |   |          |                  |
|-------------------|-------------|----|--------|--------|---|----------|---|----------|---|----------|------------------|
| DG <sub>HPU</sub> | Os013253_01 | S3 | 0.000  | -0.977 | P | 269.928  | P | 300.125  | P | 590.707  | LOC_Os03g63910.1 |
| DG <sub>HPU</sub> | Os013316_01 | S3 | -1.374 | 0.000  | P | 1065.143 | P | 410.827  | P | 363.210  | LOC_Os03g20640.1 |
| DG <sub>HPU</sub> | Os013432_01 | S3 | 0.000  | 1.400  | P | 1259.255 | P | 1081.748 | P | 410.020  | -                |
| DG <sub>HPU</sub> | Os013482_01 | S3 | 0.000  | 1.674  | P | 422.531  | P | 428.956  | P | 134.394  | LOC_Os04g36730.1 |
| DG <sub>HPU</sub> | Os013483_01 | S3 | 0.000  | 1.446  | P | 246.675  | P | 268.567  | P | 98.595   | LOC_Os01g65480.1 |
| DG <sub>HPU</sub> | Os013529_01 | S3 | -0.974 | 0.000  | P | 593.815  | P | 302.396  | P | 331.520  | -                |
| DG <sub>HPU</sub> | Os013530_01 | S3 | 0.000  | 1.318  | P | 631.099  | P | 613.472  | P | 246.027  | LOC_Os08g30060.2 |
| DG <sub>HPU</sub> | Os013532_01 | S3 | 0.000  | 1.947  | P | 1716.707 | P | 1979.752 | P | 513.448  | LOC_Os01g55094.2 |
| DG <sub>HPU</sub> | Os013568_01 | S3 | 0.000  | 1.420  | P | 473.612  | P | 480.502  | P | 179.542  | LOC_Os08g40150.2 |
| DG <sub>HPU</sub> | Os013569_01 | S3 | 0.000  | 1.306  | P | 401.684  | P | 340.504  | P | 137.722  | LOC_Os01g53150.2 |
| DG <sub>HPU</sub> | Os013615_01 | S3 | 0.000  | 1.507  | P | 176.374  | P | 255.301  | P | 89.840   | LOC_Os09g32740.1 |
| DG <sub>HPU</sub> | Os013619_01 | S3 | -1.036 | 0.000  | P | 1217.377 | P | 593.571  | P | 391.310  | -                |
| DG <sub>HPU</sub> | Os013638_01 | S3 | 0.000  | 1.431  | P | 733.665  | P | 740.409  | P | 274.532  | LOC_Os08g31470.2 |
| DG <sub>HPU</sub> | Os013639_01 | S3 | 0.000  | 1.662  | P | 497.094  | P | 535.604  | P | 169.278  | LOC_Os03g20980.1 |
| DG <sub>HPU</sub> | Os013641_01 | S3 | -1.133 | 0.000  | P | 418.245  | P | 190.655  | P | 233.909  | LOC_Os01g73120.1 |
| DG <sub>HPU</sub> | Os013643_01 | S3 | 0.000  | 1.422  | P | 408.109  | P | 409.960  | P | 152.975  | LOC_Os10g36550.3 |
| DG <sub>HPU</sub> | Os013762_01 | S3 | -1.189 | 0.000  | P | 479.268  | P | 210.185  | P | 197.307  | LOC_Os03g53750.1 |
| DG <sub>HPU</sub> | Os013814_01 | S3 | 0.000  | -1.023 | P | 306.578  | P | 298.345  | P | 606.463  | LOC_Os06g49430.1 |
| DG <sub>HPU</sub> | Os013905_01 | S3 | 0.000  | 1.669  | P | 220.737  | P | 239.868  | P | 75.437   | LOC_Os02g38800.1 |
| DG <sub>HPU</sub> | Os013918_01 | S3 | -0.922 | 0.000  | P | 700.612  | P | 369.884  | P | 325.493  | LOC_Os09g29070.1 |
| DG <sub>HPU</sub> | Os013969_01 | S3 | 0.000  | 1.547  | P | 323.030  | P | 293.027  | P | 100.273  | LOC_Os07g07610.1 |
| DG <sub>HPU</sub> | Os014124_01 | S3 | 0.000  | -0.987 | P | 691.840  | P | 659.302  | P | 1306.577 | LOC_Os09g25060.1 |
| DG <sub>HPU</sub> | Os014320_01 | S3 | -1.170 | 0.000  | P | 2888.720 | P | 1284.088 | P | 1358.578 | LOC_Os03g17570.3 |
| DG <sub>HPU</sub> | Os014383_01 | S3 | 0.000  | -1.017 | P | 550.750  | P | 500.304  | P | 1012.723 | LOC_Os09g15820.1 |
| DG <sub>HPU</sub> | Os014449_01 | S3 | 0.000  | 1.330  | P | 217.112  | P | 239.597  | P | 95.317   | LOC_Os12g26480.2 |
| DG <sub>HPU</sub> | Os014631_01 | S3 | 0.000  | 1.392  | P | 199.340  | P | 267.491  | P | 101.932  | -                |
| DG <sub>HPU</sub> | Os014668_01 | S3 | -1.461 | 0.000  | P | 337.094  | P | 122.454  | P | 103.675  | LOC_Os05g32720.1 |
| DG <sub>HPU</sub> | Os014701_01 | S3 | 0.000  | 1.421  | P | 3913.837 | P | 3915.257 | P | 1462.327 | -                |
| DG <sub>HPU</sub> | Os014805_01 | S3 | -1.282 | 0.000  | P | 464.641  | P | 191.055  | P | 179.421  | LOC_Os02g57750.1 |
| DG <sub>HPU</sub> | Os014883_01 | S3 | 1.151  | 0.000  | P | 2071.267 | P | 4600.193 | P | 5094.570 | LOC_Os06g44500.1 |
| DG <sub>HPU</sub> | Os014900_01 | S3 | 1.368  | 0.000  | P | 439.983  | P | 1135.581 | P | 1183.206 | LOC_Os04g40700.3 |



|                   |             |    |        |        |   |         |   |          |   |          |                  |
|-------------------|-------------|----|--------|--------|---|---------|---|----------|---|----------|------------------|
| DG <sub>HPU</sub> | Os015043_01 | S3 | 0.000  | 1.314  | P | 279.321 | P | 351.887  | P | 141.507  | LOC_Os11g45220.1 |
| DG <sub>HPU</sub> | Os015062_01 | S3 | 0.000  | 1.421  | P | 683.390 | P | 542.724  | P | 202.618  | LOC_Os07g28480.1 |
| DG <sub>HPU</sub> | Os015064_01 | S3 | 0.000  | 1.417  | P | 886.731 | P | 721.296  | P | 270.179  | LOC_Os02g40010.2 |
| DG <sub>HPU</sub> | Os015155_01 | S3 | -1.516 | 0.000  | P | 600.648 | P | 210.063  | P | 230.925  | LOC_Os01g71590.3 |
| DG <sub>HPU</sub> | Os015278_01 | S3 | 0.000  | -1.048 | P | 313.135 | P | 192.369  | P | 397.766  | LOC_Os09g35770.1 |
| DG <sub>HPU</sub> | Os015370_01 | S3 | 0.000  | 1.326  | P | 190.920 | P | 341.574  | P | 136.238  | LOC_Os04g24180.2 |
| DG <sub>HPU</sub> | Os015461_01 | S3 | 0.000  | 1.540  | P | 308.199 | P | 357.722  | P | 122.986  | LOC_Os11g06420.1 |
| DG <sub>HPU</sub> | Os015489_01 | S3 | -0.970 | 0.000  | P | 413.187 | P | 210.890  | P | 172.839  | -                |
| DG <sub>HPU</sub> | Os015562_01 | S3 | 0.000  | 1.425  | P | 539.729 | P | 503.215  | P | 187.348  | LOC_Os12g05730.1 |
| DG <sub>HPU</sub> | Os015572_01 | S3 | -1.022 | 0.000  | P | 359.425 | P | 176.959  | P | 242.083  | LOC_Os02g49570.1 |
| DG <sub>HPU</sub> | Os015576_01 | S3 | 0.000  | 1.276  | P | 259.536 | P | 354.824  | P | 146.569  | LOC_Os12g18200.1 |
| DG <sub>HPU</sub> | Os015762_01 | S3 | 0.000  | 1.455  | P | 937.562 | P | 734.467  | P | 267.886  | LOC_Os03g47740.1 |
| DG <sub>HPU</sub> | Os015971_01 | S3 | -0.999 | 0.000  | P | 408.451 | P | 204.322  | P | 128.548  | LOC_Os03g29170.1 |
| DG <sub>HPU</sub> | Os016165_01 | S3 | 0.000  | 1.400  | P | 808.764 | P | 753.172  | P | 285.494  | LOC_Os04g50216.1 |
| DG <sub>HPU</sub> | Os016171_01 | S3 | 1.135  | 0.000  | P | 230.648 | P | 506.631  | P | 364.393  | LOC_Os12g37870.1 |
| DG <sub>HPU</sub> | Os016176_01 | S3 | -0.944 | 0.000  | P | 331.784 | P | 172.486  | P | 148.457  | LOC_Os12g18860.1 |
| DG <sub>HPU</sub> | Os016181_01 | S3 | 0.000  | 1.653  | P | 305.549 | P | 302.335  | P | 96.159   | LOC_Os09g32430.1 |
| DG <sub>HPU</sub> | Os016187_01 | S3 | 0.000  | 1.366  | P | 291.791 | P | 319.404  | P | 123.896  | LOC_Os04g42670.1 |
| DG <sub>HPU</sub> | Os016188_01 | S3 | 0.000  | 1.374  | P | 318.039 | P | 292.846  | P | 113.012  | LOC_Os01g66420.1 |
| DG <sub>HPU</sub> | Os016468_01 | S3 | 0.000  | 1.284  | P | 144.608 | P | 184.331  | P | 75.685   | LOC_Os11g08909.1 |
| DG <sub>HPU</sub> | Os016565_01 | S3 | 0.000  | 1.688  | P | 404.664 | P | 419.101  | P | 130.043  | LOC_Os07g38580.1 |
| DG <sub>HPU</sub> | Os016601_01 | S3 | 0.000  | -1.230 | P | 298.914 | P | 173.598  | P | 407.223  | LOC_Os09g15480.1 |
| DG <sub>HPU</sub> | Os016774_01 | S3 | 0.000  | 1.332  | P | 244.144 | P | 237.620  | P | 94.404   | LOC_Os02g16450.1 |
| DG <sub>HPU</sub> | Os016789_01 | S3 | -1.021 | 0.000  | P | 950.066 | P | 468.193  | P | 365.552  | LOC_Os01g48300.4 |
| DG <sub>HPU</sub> | Os016870_01 | S3 | 0.000  | 1.857  | P | 608.466 | P | 790.224  | P | 218.139  | LOC_Os02g56280.1 |
| DG <sub>HPU</sub> | Os016895_01 | S3 | 0.000  | 1.344  | P | 371.763 | P | 399.227  | P | 157.301  | -                |
| DG <sub>HPU</sub> | Os016919_01 | S3 | 0.000  | 1.713  | P | 913.538 | P | 1372.703 | P | 418.638  | LOC_Os02g01590.1 |
| DG <sub>HPU</sub> | Os017342_01 | S3 | 0.000  | 1.518  | P | 306.367 | P | 306.874  | P | 107.135  | LOC_Os01g58580.1 |
| DG <sub>HPU</sub> | Os017352_01 | S3 | 1.575  | 0.000  | P | 748.338 | P | 2228.962 | P | 2078.659 | -                |
| DG <sub>HPU</sub> | Os017408_01 | S3 | -1.076 | 0.000  | P | 286.182 | P | 135.738  | P | 162.173  | LOC_Os09g12550.1 |
| DG <sub>HPU</sub> | Os017413_01 | S3 | 0.000  | 1.447  | P | 426.276 | P | 347.169  | P | 127.349  | LOC_Os01g35580.3 |

|                   |             |    |        |        |   |          |   |          |   |          |                  |
|-------------------|-------------|----|--------|--------|---|----------|---|----------|---|----------|------------------|
| DG <sub>HPU</sub> | Os017686_01 | S3 | 0.000  | 1.516  | P | 962.656  | P | 1050.002 | P | 367.043  | LOC_Os04g48860.2 |
| DG <sub>HPU</sub> | Os017872_01 | S3 | -1.166 | 0.000  | P | 390.588  | P | 174.115  | P | 176.587  | LOC_Os04g12080.1 |
| DG <sub>HPU</sub> | Os017981_01 | S3 | -1.119 | 10.000 | P | 287.542  | P | 132.387  | A | 82.994   | LOC_Os09g17680.1 |
| DG <sub>HPU</sub> | Os018018_01 | S3 | 0.000  | 1.268  | P | 217.197  | P | 231.642  | P | 96.184   | LOC_Os03g44210.2 |
| DG <sub>HPU</sub> | Os018042_01 | S3 | 0.000  | 1.614  | P | 586.707  | P | 859.135  | P | 280.741  | LOC_Os02g42940.1 |
| DG <sub>HPU</sub> | Os018050_01 | S3 | -0.969 | 0.000  | P | 400.700  | P | 204.738  | P | 200.062  | LOC_Os01g68750.1 |
| DG <sub>HPU</sub> | Os018061_01 | S3 | 1.114  | 0.000  | P | 153.415  | P | 332.035  | P | 355.418  | LOC_Os03g15120.1 |
| DG <sub>HPU</sub> | Os018107_01 | S3 | 0.000  | 1.393  | P | 416.922  | P | 385.379  | P | 146.765  | LOC_Os02g45344.1 |
| DG <sub>HPU</sub> | Os018131_01 | S3 | 0.000  | 1.293  | P | 351.429  | P | 394.493  | P | 160.986  | LOC_Os12g42140.1 |
| DG <sub>HPU</sub> | Os018345_01 | S3 | 1.108  | 0.000  | P | 211.355  | P | 455.509  | P | 492.520  | LOC_Os12g34860.1 |
| DG <sub>HPU</sub> | Os018397_01 | S3 | -1.165 | 0.000  | P | 877.969  | P | 391.507  | P | 288.961  | LOC_Os08g04450.4 |
| DG <sub>HPU</sub> | Os018427_01 | S3 | -1.281 | 0.000  | P | 460.861  | P | 189.649  | P | 212.176  | LOC_Os08g34950.1 |
| DG <sub>HPU</sub> | Os018432_01 | S3 | 1.126  | 0.000  | P | 258.627  | P | 564.372  | P | 613.930  | LOC_Os08g42420.5 |
| DG <sub>HPU</sub> | Os018512_01 | S3 | 0.000  | 1.540  | P | 304.853  | P | 331.761  | P | 114.073  | LOC_Os01g65210.1 |
| DG <sub>HPU</sub> | Os018514_01 | S3 | 0.000  | 1.372  | P | 305.601  | P | 280.680  | P | 108.468  | LOC_Os09g21000.1 |
| DG <sub>HPU</sub> | Os018621_01 | S3 | 1.163  | 0.000  | P | 617.342  | P | 1382.089 | P | 1864.478 | LOC_Os09g29980.2 |
| DG <sub>HPU</sub> | Os018705_01 | S3 | -1.041 | 0.000  | P | 376.306  | P | 182.866  | P | 148.444  | LOC_Os04g49960.1 |
| DG <sub>HPU</sub> | Os018744_01 | S3 | 0.000  | 1.289  | P | 713.989  | P | 595.408  | P | 243.714  | LOC_Os08g39630.1 |
| DG <sub>HPU</sub> | Os018766_01 | S3 | 0.000  | 1.292  | P | 1308.014 | P | 905.827  | P | 369.869  | LOC_Os04g40670.1 |
| DG <sub>HPU</sub> | Os018837_01 | S3 | -0.928 | 0.000  | P | 693.069  | P | 364.326  | P | 333.290  | LOC_Os01g61880.1 |
| DG <sub>HPU</sub> | Os018865_01 | S3 | 0.000  | 1.277  | P | 768.007  | P | 779.162  | P | 321.452  | -                |
| DG <sub>HPU</sub> | Os019071_01 | S3 | -0.957 | 0.000  | P | 697.579  | P | 359.413  | P | 256.277  | LOC_Os02g38840.2 |
| DG <sub>HPU</sub> | Os019114_01 | S3 | 0.000  | 1.599  | P | 332.873  | P | 288.238  | P | 95.118   | LOC_Os04g49000.1 |
| DG <sub>HPU</sub> | Os019144_01 | S3 | 0.000  | 1.886  | P | 410.754  | P | 542.964  | P | 146.921  | LOC_Os07g10600.2 |
| DG <sub>HPU</sub> | Os019163_01 | S3 | 0.000  | 1.391  | P | 2066.703 | P | 2101.201 | P | 801.138  | LOC_Os01g08560.2 |
| DG <sub>HPU</sub> | Os019255_01 | S3 | 0.000  | 1.586  | P | 269.568  | P | 278.611  | P | 92.775   | LOC_Os05g11810.1 |
| DG <sub>HPU</sub> | Os019258_01 | S3 | 0.000  | 1.359  | P | 201.026  | P | 289.990  | P | 113.018  | LOC_Os03g46190.2 |
| DG <sub>HPU</sub> | Os019296_01 | S3 | 0.000  | -1.084 | P | 298.241  | P | 290.668  | P | 616.184  | LOC_Os04g49210.1 |
| DG <sub>HPU</sub> | Os019328_01 | S3 | -0.926 | 0.000  | P | 310.124  | P | 163.209  | P | 147.418  | -                |
| DG <sub>HPU</sub> | Os019437_01 | S3 | 0.000  | -1.648 | P | 253.831  | P | 216.298  | P | 677.668  | LOC_Os12g42260.2 |
| DG <sub>HPU</sub> | Os019546_01 | S3 | 0.000  | 1.664  | P | 321.434  | P | 373.151  | P | 117.733  | LOC_Os01g53000.1 |

|                   |             |    |        |        |   |          |   |          |   |          |                  |
|-------------------|-------------|----|--------|--------|---|----------|---|----------|---|----------|------------------|
| DG <sub>HPU</sub> | Os019634_01 | S3 | -1.023 | 0.000  | P | 1896.826 | P | 933.593  | P | 544.904  | LOC_Os06g02380.2 |
| DG <sub>HPU</sub> | Os019923_01 | S3 | 0.000  | 1.307  | P | 245.210  | P | 300.469  | P | 121.435  | LOC_Os01g51890.1 |
| DG <sub>HPU</sub> | Os019943_01 | S3 | 0.000  | 1.329  | P | 521.666  | P | 606.602  | P | 241.427  | LOC_Os07g27490.1 |
| DG <sub>HPU</sub> | Os019988_01 | S3 | 0.000  | 1.334  | P | 202.637  | P | 191.673  | P | 76.012   | LOC_Os07g37140.1 |
| DG <sub>HPU</sub> | Os020042_01 | S3 | 0.000  | 1.480  | P | 422.895  | P | 510.944  | P | 183.141  | LOC_Os12g40550.1 |
| DG <sub>HPU</sub> | Os020133_01 | S3 | 1.366  | 0.000  | P | 643.267  | P | 1657.613 | P | 1878.664 | LOC_Os11g42030.1 |
| DG <sub>HPU</sub> | Os020193_01 | S3 | 1.482  | 1.774  | P | 143.555  | P | 401.043  | P | 117.303  | LOC_Os07g44550.1 |
| DG <sub>HPU</sub> | Os020254_01 | S3 | 0.000  | 1.508  | P | 444.568  | P | 389.975  | P | 137.086  | LOC_Os01g48330.1 |
| DG <sub>HPU</sub> | Os020277_01 | S3 | 0.000  | 1.484  | P | 351.476  | P | 298.522  | P | 106.706  | LOC_Os02g47860.2 |
| DG <sub>HPU</sub> | Os020302_01 | S3 | 0.000  | 1.308  | P | 862.278  | P | 703.450  | P | 284.072  | LOC_Os02g57180.1 |
| DG <sub>HPU</sub> | Os020343_01 | S3 | 0.000  | 1.387  | P | 353.664  | P | 316.371  | P | 120.972  | LOC_Os11g16410.1 |
| DG <sub>HPU</sub> | Os020347_01 | S3 | 0.000  | 1.371  | P | 239.135  | P | 295.705  | P | 114.359  | LOC_Os07g45350.3 |
| DG <sub>HPU</sub> | Os020349_01 | S3 | 0.000  | 1.493  | P | 247.978  | P | 260.203  | P | 92.453   | LOC_Os03g10400.3 |
| DG <sub>HPU</sub> | Os020367_01 | S3 | 0.000  | 1.565  | P | 526.355  | P | 515.422  | P | 174.152  | LOC_Os01g15630.1 |
| DG <sub>HPU</sub> | Os020369_01 | S3 | 0.000  | 1.346  | P | 354.627  | P | 323.770  | P | 127.397  | LOC_Os03g46340.1 |
| DG <sub>HPU</sub> | Os020397_01 | S3 | 0.000  | 2.424  | P | 299.579  | P | 525.393  | P | 97.908   | LOC_Os01g09640.1 |
| DG <sub>HPU</sub> | Os020402_01 | S3 | -0.941 | 0.000  | P | 296.827  | P | 154.622  | P | 143.150  | LOC_Os02g23890.1 |
| DG <sub>HPU</sub> | Os020538_01 | S3 | -1.204 | 10.000 | P | 355.007  | P | 154.092  | A | 92.235   | -                |
| DG <sub>HPU</sub> | Os020634_01 | S3 | 0.000  | 1.538  | P | 266.544  | P | 264.869  | P | 91.219   | LOC_Os02g50970.1 |
| DG <sub>HPU</sub> | Os020653_01 | S3 | 0.000  | 1.292  | P | 455.435  | P | 826.713  | P | 337.721  | LOC_Os11g05990.1 |
| DG <sub>HPU</sub> | Os020680_01 | S3 | 0.000  | 1.629  | P | 223.637  | P | 306.348  | P | 99.028   | LOC_Os01g65986.1 |
| DG <sub>HPU</sub> | Os020705_01 | S3 | 0.000  | 1.447  | P | 666.468  | P | 577.416  | P | 211.800  | LOC_Os01g34670.1 |
| DG <sub>HPU</sub> | Os021034_01 | S3 | 0.000  | 1.399  | P | 258.730  | P | 271.702  | P | 103.022  | LOC_Os01g17279.1 |
| DG <sub>HPU</sub> | Os021078_01 | S3 | 0.000  | 1.482  | P | 442.465  | P | 384.824  | P | 137.771  | LOC_Os03g57940.3 |
| DG <sub>HPU</sub> | Os021147_01 | S3 | 1.169  | 0.000  | P | 170.102  | P | 382.578  | P | 247.391  | LOC_Os08g35860.1 |
| DG <sub>HPU</sub> | Os021178_01 | S3 | 0.000  | 1.692  | P | 425.126  | P | 423.602  | P | 131.131  | LOC_Os04g56646.1 |
| DG <sub>HPU</sub> | Os021413_01 | S3 | 0.000  | 1.571  | P | 537.101  | P | 460.362  | P | 154.898  | LOC_Os08g25799.1 |
| DG <sub>HPU</sub> | Os021431_01 | S3 | 0.000  | 1.590  | P | 393.573  | P | 463.245  | P | 153.919  | LOC_Os01g51380.2 |
| DG <sub>HPU</sub> | Os021455_01 | S3 | 0.000  | 1.792  | P | 1740.024 | P | 1938.517 | P | 559.956  | LOC_Os03g55820.1 |
| DG <sub>HPU</sub> | Os021458_01 | S3 | 0.000  | 1.275  | P | 1417.909 | P | 1228.284 | P | 507.505  | LOC_Os07g14270.1 |
| DG <sub>HPU</sub> | Os021532_01 | S3 | 0.000  | 1.656  | P | 341.794  | P | 304.769  | P | 96.681   | LOC_Os11g34230.1 |

|                   |             |    |        |        |   |          |   |          |   |          |                  |
|-------------------|-------------|----|--------|--------|---|----------|---|----------|---|----------|------------------|
| DG <sub>HPU</sub> | Os021555_01 | S3 | 0.000  | 1.817  | P | 275.933  | P | 374.743  | P | 106.341  | LOC_Os05g04530.1 |
| DG <sub>HPU</sub> | Os021590_01 | S3 | 1.179  | 0.000  | P | 1749.266 | P | 3960.900 | P | 5205.467 | LOC_Os06g35560.1 |
| DG <sub>HPU</sub> | Os021857_01 | S3 | 0.000  | 1.786  | P | 1550.246 | P | 1760.587 | P | 510.351  | LOC_Os10g41200.1 |
| DG <sub>HPU</sub> | Os021904_01 | S3 | 0.000  | 1.400  | P | 1103.285 | P | 1013.338 | P | 383.949  | LOC_Os02g54980.1 |
| DG <sub>HPU</sub> | Os021927_01 | S3 | -0.925 | 0.000  | P | 659.237  | P | 347.223  | P | 256.033  | LOC_Os05g32820.1 |
| DG <sub>HPU</sub> | Os022155_01 | S3 | 0.000  | 1.447  | P | 388.725  | P | 315.572  | P | 115.753  | LOC_Os04g58020.1 |
| DG <sub>HPU</sub> | Os022268_01 | S3 | 0.000  | -1.301 | P | 211.495  | P | 231.463  | P | 570.361  | LOC_Os04g45460.1 |
| DG <sub>HPU</sub> | Os022683_01 | S3 | 0.000  | -0.966 | P | 367.259  | P | 385.941  | P | 754.072  | LOC_Os01g18870.1 |
| DG <sub>HPU</sub> | Os022954_01 | S3 | 0.000  | 1.708  | P | 584.996  | P | 538.472  | P | 164.783  | LOC_Os08g34170.1 |
| DG <sub>HPU</sub> | Os023050_01 | S3 | 0.000  | 1.346  | P | 1445.397 | P | 1046.384 | P | 411.654  | LOC_Os06g02330.1 |
| DG <sub>HPU</sub> | Os023116_01 | S3 | 2.079  | 1.723  | P | 92.327   | P | 390.083  | P | 118.137  | -                |
| DG <sub>HPU</sub> | Os023212_01 | S3 | -0.918 | 10.000 | P | 438.436  | P | 231.966  | A | 58.238   | -                |
| DG <sub>HPU</sub> | Os023497_01 | S3 | 0.000  | -1.268 | P | 446.802  | P | 331.739  | P | 799.121  | -                |
| DG <sub>HPU</sub> | Os023653_01 | S3 | 0.000  | 1.285  | P | 1829.397 | P | 1345.983 | P | 552.207  | LOC_Os05g43140.1 |
| DG <sub>HPU</sub> | Os023998_01 | S3 | 0.000  | 1.530  | P | 855.774  | P | 784.937  | P | 271.803  | LOC_Os08g42570.1 |
| DG <sub>HPU</sub> | Os024046_01 | S3 | -0.919 | 0.000  | P | 492.759  | P | 260.637  | P | 174.622  | LOC_Os02g44010.1 |
| DG <sub>HPU</sub> | Os024099_01 | S3 | -1.786 | 0.000  | P | 797.622  | P | 231.334  | P | 401.753  | LOC_Os01g51690.1 |
| DG <sub>HPU</sub> | Os024827_01 | S3 | 0.000  | 1.654  | P | 217.536  | P | 281.583  | P | 89.447   | -                |
| DG <sub>HPU</sub> | Os025124_01 | S3 | 0.000  | 1.498  | P | 742.272  | P | 863.681  | P | 305.802  | LOC_Os08g30730.1 |
| DG <sub>HPU</sub> | Os025146_01 | S3 | 0.000  | 1.570  | P | 265.313  | P | 288.093  | P | 97.035   | LOC_Os06g08580.1 |
| DG <sub>HPU</sub> | Os025567_01 | S3 | 0.000  | 1.490  | P | 629.206  | P | 524.855  | P | 186.844  | LOC_Os11g28270.3 |
| DG <sub>HPU</sub> | Os025868_01 | S3 | 1.137  | 0.000  | P | 161.711  | P | 355.731  | P | 284.031  | LOC_Os03g02830.1 |
| DG <sub>HPU</sub> | Os025874_01 | S3 | 0.000  | 1.445  | P | 634.858  | P | 643.711  | P | 236.439  | LOC_Os02g53490.1 |
| DG <sub>HPU</sub> | Os025882_01 | S3 | -1.150 | 0.000  | P | 810.151  | P | 364.962  | P | 271.200  | LOC_Os01g20830.1 |
| DG <sub>HPU</sub> | Os025897_01 | S3 | 0.000  | 1.398  | P | 1443.580 | P | 1124.570 | P | 426.637  | LOC_Os05g31062.1 |
| DG <sub>HPU</sub> | Os025904_01 | S3 | 0.000  | 2.082  | P | 359.811  | P | 457.387  | P | 108.014  | LOC_Os01g49210.1 |
| DG <sub>HPU</sub> | Os026022_01 | S3 | 0.000  | -1.196 | P | 448.663  | P | 455.647  | P | 1043.546 | LOC_Os10g28420.1 |
| DG <sub>HPU</sub> | Os026372_01 | S3 | 0.000  | 1.288  | P | 368.475  | P | 335.269  | P | 137.320  | LOC_Os05g27530.1 |
| DG <sub>HPU</sub> | Os026917_01 | S3 | -1.071 | -1.078 | P | 9226.499 | P | 4392.807 | P | 9274.304 | LOC_Os04g52250.1 |
| DG <sub>HPU</sub> | Os027607_01 | S3 | 1.280  | 0.000  | P | 101.479  | P | 246.446  | P | 262.136  | LOC_Os02g07830.1 |
| DG <sub>HPU</sub> | Os027821_01 | S3 | -1.241 | 0.000  | P | 1046.934 | P | 443.068  | P | 330.292  | LOC_Os07g37730.1 |

|                   |             |    |        |        |   |          |   |          |   |          |                  |
|-------------------|-------------|----|--------|--------|---|----------|---|----------|---|----------|------------------|
| DG <sub>HPU</sub> | Os028543_01 | S3 | 0.000  | 1.304  | P | 381.820  | P | 316.274  | P | 128.052  | LOC_Os03g47890.1 |
| DG <sub>HPU</sub> | Os028619_01 | S3 | 0.000  | 1.456  | P | 149.615  | P | 263.970  | P | 96.206   | LOC_Os11g14120.1 |
| DG <sub>HPU</sub> | Os028782_01 | S3 | 0.000  | -1.121 | P | 301.193  | P | 390.371  | P | 849.155  | LOC_Os11g12810.1 |
| DG <sub>HPU</sub> | Os029050_01 | S3 | 1.181  | 0.000  | P | 240.585  | P | 545.662  | P | 465.495  | LOC_Os10g35260.1 |
| DG <sub>HPU</sub> | Os029577_01 | S3 | 1.195  | 0.000  | P | 340.718  | P | 780.084  | P | 977.208  | LOC_Os05g50340.1 |
| DG <sub>HPU</sub> | Os029655_01 | S3 | 1.106  | 0.000  | P | 427.221  | P | 919.767  | P | 1063.056 | LOC_Os07g36220.1 |
| DG <sub>HPU</sub> | Os029901_01 | S3 | 0.000  | -1.008 | P | 196.561  | P | 202.747  | P | 407.705  | LOC_Os05g02650.1 |
| DG <sub>HPU</sub> | Os029975_01 | S3 | 1.149  | 0.000  | P | 138.616  | P | 307.301  | P | 337.619  | -                |
| DG <sub>HPU</sub> | Os030080_01 | S3 | -1.561 | 0.000  | P | 1002.935 | P | 339.840  | P | 472.159  | LOC_Os03g45450.1 |
| DG <sub>HPU</sub> | Os030179_01 | S3 | 0.000  | -1.017 | P | 255.199  | P | 279.463  | P | 565.639  | LOC_Os01g54540.1 |
| DG <sub>HPU</sub> | Os030366_01 | S3 | 1.120  | 0.000  | P | 217.990  | P | 473.858  | P | 502.128  | LOC_Os04g41350.1 |
| DG <sub>HPU</sub> | Os030442_01 | S3 | 1.132  | 0.000  | P | 1555.587 | P | 3409.830 | P | 3854.323 | LOC_Os06g10290.1 |
| DG <sub>HPU</sub> | Os030484_01 | S3 | -1.095 | 0.000  | P | 2270.374 | P | 1062.683 | P | 1122.340 | -                |
| DG <sub>HPU</sub> | Os030546_01 | S3 | 1.172  | 0.000  | P | 114.302  | P | 257.574  | P | 265.840  | LOC_Os09g16270.1 |
| DG <sub>HPU</sub> | Os030652_01 | S3 | 0.000  | -1.012 | P | 196.414  | P | 281.163  | P | 566.895  | LOC_Os06g11940.1 |
| DG <sub>HPU</sub> | Os030899_01 | S3 | 0.000  | 1.834  | P | 466.889  | P | 507.123  | P | 142.234  | LOC_Os04g53550.1 |
| DG <sub>HPU</sub> | Os030946_01 | S3 | 0.000  | 1.259  | P | 1020.620 | P | 780.263  | P | 326.008  | LOC_Os09g26470.1 |
| DG <sub>HPU</sub> | Os031177_01 | S3 | 1.762  | 0.000  | P | 158.940  | P | 538.920  | P | 355.137  | LOC_Os05g13490.1 |
| DG <sub>HPU</sub> | Os031628_01 | S3 | 2.789  | 1.737  | P | 108.323  | P | 748.507  | P | 224.608  | LOC_Os09g37290.1 |
| DG <sub>HPU</sub> | Os031725_01 | S3 | 0.000  | 1.597  | P | 435.989  | P | 429.308  | P | 141.946  | LOC_Os11g42640.1 |
| DG <sub>HPU</sub> | Os031751_01 | S3 | 1.548  | 0.000  | P | 109.796  | P | 321.092  | P | 276.989  | -                |
| DG <sub>HPU</sub> | Os031779_01 | S3 | -0.992 | 0.000  | P | 331.047  | P | 166.447  | P | 122.738  | -                |
| DG <sub>HPU</sub> | Os031960_01 | S3 | 1.848  | 0.000  | P | 152.148  | P | 547.893  | P | 273.123  | LOC_Os11g28170.1 |
| DG <sub>HPU</sub> | Os032029_01 | S3 | 1.452  | 0.000  | P | 95.327   | P | 260.741  | P | 280.172  | -                |
| DG <sub>HPU</sub> | Os032136_01 | S3 | 0.000  | 1.755  | P | 395.777  | P | 413.575  | P | 122.559  | LOC_Os03g22634.1 |
| DG <sub>HPU</sub> | Os032469_01 | S3 | 1.132  | 0.000  | P | 104.537  | P | 229.107  | P | 172.991  | LOC_Os03g49920.1 |
| DG <sub>HPU</sub> | Os032573_01 | S3 | 1.252  | 10.000 | P | 241.854  | P | 576.076  | A | 269.604  | -                |
| DG <sub>HPU</sub> | Os032695_01 | S3 | 1.273  | 0.000  | P | 112.340  | P | 271.421  | P | 339.779  | LOC_Os05g18870.1 |
| DG <sub>HPU</sub> | Os032727_01 | S3 | 1.196  | 0.000  | P | 148.917  | P | 341.265  | P | 433.358  | LOC_Os08g04520.1 |
| DG <sub>HPU</sub> | Os032793_01 | S3 | 0.000  | 1.672  | P | 511.457  | P | 500.199  | P | 156.970  | LOC_Os07g46190.1 |
| DG <sub>HPU</sub> | Os033046_01 | S3 | -1.131 | 0.000  | P | 418.396  | P | 191.032  | P | 236.721  | LOC_Os10g35330.1 |

|                   |             |    |        |        |   |          |   |          |   |          |                  |
|-------------------|-------------|----|--------|--------|---|----------|---|----------|---|----------|------------------|
| DG <sub>HPU</sub> | Os033643_01 | S3 | 0.000  | 1.261  | P | 430.070  | P | 421.954  | P | 176.090  | -                |
| DG <sub>HPU</sub> | Os033886_01 | S3 | 1.299  | 0.000  | P | 170.628  | P | 419.771  | P | 346.813  | LOC_Os08g33300.1 |
| DG <sub>HPU</sub> | Os033950_01 | S3 | -1.547 | 10.000 | P | 488.058  | P | 166.989  | A | 50.431   | -                |
| DG <sub>HPU</sub> | Os034452_01 | S3 | 1.202  | 0.000  | P | 111.794  | P | 257.114  | P | 320.220  | LOC_Os09g02350.1 |
| DG <sub>HPU</sub> | Os034533_01 | S3 | 1.422  | 0.000  | P | 289.173  | P | 774.693  | P | 464.021  | LOC_Os05g12270.1 |
| DG <sub>HPU</sub> | Os034759_01 | S3 | 1.647  | 1.271  | P | 643.080  | P | 2014.373 | P | 834.596  | LOC_Os04g13090.1 |
| DG <sub>HPU</sub> | Os034801_01 | S3 | 1.115  | 10.000 | P | 118.364  | P | 256.428  | A | 99.473   | LOC_Os09g24310.1 |
| DG <sub>HPU</sub> | Os035128_01 | S3 | 1.288  | 10.000 | P | 132.032  | P | 322.373  | A | 145.808  | LOC_Os05g46060.1 |
| DG <sub>HPU</sub> | Os035825_01 | S3 | -1.462 | 0.000  | P | 508.589  | P | 184.574  | P | 142.485  | -                |
| DG <sub>HPU</sub> | Os035930_01 | S3 | 0.000  | -1.418 | P | 246.914  | P | 163.277  | P | 436.213  | LOC_Os04g31290.1 |
| DG <sub>HPU</sub> | Os037353_01 | S3 | 0.000  | 1.614  | P | 437.062  | P | 414.550  | P | 135.400  | -                |
| DG <sub>HPU</sub> | Os037594_01 | S3 | 0.000  | -0.995 | P | 1469.707 | P | 1676.965 | P | 3342.911 | -                |
| DG <sub>HPU</sub> | Os037666_01 | S3 | 1.241  | 0.000  | P | 109.165  | P | 258.064  | P | 288.806  | LOC_Os10g26400.2 |
| DG <sub>HPU</sub> | Os037974_01 | S3 | 0.000  | -1.060 | P | 200.202  | P | 170.909  | P | 356.351  | LOC_Os02g13460.1 |
| DG <sub>HPU</sub> | Os038937_01 | S3 | 1.322  | 0.000  | P | 235.984  | P | 589.926  | P | 685.938  | LOC_Os06g41680.1 |
| DG <sub>HPU</sub> | Os039170_01 | S3 | -0.948 | 0.000  | P | 1161.087 | P | 601.902  | P | 635.208  | LOC_Os02g47744.4 |
| DG <sub>HPU</sub> | Os039470_01 | S3 | 1.261  | 0.000  | P | 163.917  | P | 392.722  | P | 389.886  | LOC_Os01g24350.1 |
| DG <sub>HPU</sub> | Os039580_01 | S3 | -1.602 | 10.000 | P | 1155.843 | P | 380.629  | A | 76.230   | LOC_Os02g40180.1 |
| DG <sub>HPU</sub> | Os040246_01 | S3 | -1.022 | 0.000  | P | 875.018  | P | 430.863  | P | 459.539  | LOC_Os08g44670.1 |
| DG <sub>HPU</sub> | Os040328_01 | S3 | 10.000 | -1.263 | A | 62.654   | P | 265.940  | P | 638.184  | LOC_Os05g31400.1 |
| DG <sub>HPU</sub> | Os040512_01 | S3 | -0.945 | 0.000  | P | 574.197  | P | 298.201  | P | 170.382  | LOC_Os04g54990.1 |
| DG <sub>HPU</sub> | Os041436_01 | S3 | -1.321 | 0.000  | P | 1054.481 | P | 422.106  | P | 350.264  | LOC_Os11g47950.1 |
| DG <sub>HPU</sub> | Os041507_01 | S3 | 1.415  | 0.000  | P | 370.056  | P | 986.584  | P | 1105.807 | -                |
| DG <sub>HPU</sub> | Os042108_01 | S3 | 0.000  | -1.115 | P | 334.894  | P | 317.186  | P | 686.853  | LOC_Os09g26580.1 |
| DG <sub>HPU</sub> | Os042254_01 | S3 | 0.000  | -1.132 | P | 1061.870 | P | 650.002  | P | 1424.262 | LOC_Os02g26380.1 |
| DG <sub>HPU</sub> | Os042450_01 | S3 | 0.000  | 1.395  | P | 321.881  | P | 250.228  | P | 95.177   | LOC_Os11g28104.1 |
| DG <sub>HPU</sub> | Os042492_01 | S3 | 0.000  | -1.029 | P | 418.042  | P | 376.558  | P | 768.572  | -                |
| DG <sub>HPU</sub> | Os042564_01 | S3 | 0.000  | 1.420  | P | 295.319  | P | 291.682  | P | 109.027  | LOC_Os12g12640.1 |
| DG <sub>HPU</sub> | Os042725_01 | S3 | 0.000  | 1.754  | P | 228.479  | P | 256.425  | P | 76.002   | LOC_Os07g35740.1 |
| DG <sub>HPU</sub> | Os043254_01 | S3 | 0.000  | -1.121 | P | 252.497  | P | 218.812  | P | 475.964  | LOC_Os09g18070.1 |
| DG <sub>HPU</sub> | Os043530_01 | S3 | 0.000  | 1.281  | P | 1378.785 | P | 1037.250 | P | 426.780  | LOC_Os06g06340.1 |

|                   |             |    |        |        |   |          |   |          |   |          |                  |
|-------------------|-------------|----|--------|--------|---|----------|---|----------|---|----------|------------------|
| DG <sub>HPU</sub> | Os043706_01 | S3 | 0.000  | 1.589  | P | 283.419  | P | 403.180  | P | 134.038  | LOC_Os08g13790.1 |
| DG <sub>HPU</sub> | Os043735_01 | S3 | 0.000  | 1.374  | P | 564.826  | P | 475.524  | P | 183.504  | LOC_Os05g04380.1 |
| DG <sub>HPU</sub> | Os044089_01 | S3 | 0.000  | -1.182 | P | 397.007  | P | 373.329  | P | 847.000  | LOC_Os07g12450.1 |
| DG <sub>HPU</sub> | Os044334_01 | S3 | 0.000  | 1.259  | P | 239.450  | P | 222.386  | P | 92.945   | LOC_Os06g15020.1 |
| DG <sub>HPU</sub> | Os044467_01 | S3 | 0.000  | 1.442  | P | 1359.797 | P | 1406.096 | P | 517.361  | LOC_Os03g63310.1 |
| DG <sub>HPU</sub> | Os044477_01 | S3 | 0.000  | 1.541  | P | 272.552  | P | 223.651  | P | 76.879   | LOC_Os12g10800.1 |
| DG <sub>HPU</sub> | Os045285_01 | S3 | 0.000  | 1.531  | P | 611.179  | P | 496.124  | P | 171.669  | LOC_Os12g09720.1 |
| DG <sub>HPU</sub> | Os045308_01 | S3 | 0.000  | 1.348  | P | 169.764  | P | 223.023  | P | 87.640   | LOC_Os06g37250.1 |
| DG <sub>HPU</sub> | Os045521_01 | S3 | 1.300  | 0.000  | P | 299.250  | P | 736.758  | P | 855.011  | -                |
| DG <sub>HPU</sub> | Os045563_01 | S3 | 0.000  | 1.344  | P | 296.159  | P | 324.002  | P | 127.629  | LOC_Os08g15950.1 |
| DG <sub>HPU</sub> | Os045661_01 | S3 | 0.000  | 1.410  | P | 638.373  | P | 659.015  | P | 248.024  | LOC_Os10g23180.1 |
| DG <sub>HPU</sub> | Os045861_01 | S3 | 1.245  | 0.000  | P | 479.469  | P | 1136.729 | P | 1336.020 | LOC_Os09g19200.1 |
| DG <sub>HPU</sub> | Os046004_01 | S3 | 1.133  | 0.000  | P | 788.437  | P | 1729.470 | P | 2325.441 | LOC_Os02g24410.1 |
| DG <sub>HPU</sub> | Os046150_01 | S3 | 0.000  | 1.291  | P | 231.060  | P | 231.822  | P | 94.737   | LOC_Os10g40450.1 |
| DG <sub>HPU</sub> | Os046492_01 | S3 | 0.000  | -1.113 | P | 729.376  | P | 634.354  | P | 1372.472 | LOC_Os10g11012.1 |
| DG <sub>HPU</sub> | Os046947_01 | S3 | 1.319  | 0.000  | P | 124.081  | P | 309.567  | P | 376.957  | -                |
| DG <sub>HPU</sub> | Os047419_01 | S3 | -0.963 | 0.000  | P | 482.037  | P | 247.231  | P | 297.979  | LOC_Os04g01250.2 |
| DG <sub>HPU</sub> | Os047560_01 | S3 | 0.000  | 1.638  | P | 1182.610 | P | 1455.186 | P | 467.621  | LOC_Os07g12890.1 |
| DG <sub>HPU</sub> | Os048275_01 | S3 | 1.118  | 0.000  | P | 156.475  | P | 339.625  | P | 190.562  | LOC_Os07g48190.1 |
| DG <sub>HPU</sub> | Os048291_01 | S3 | 0.000  | 1.339  | P | 376.976  | P | 292.996  | P | 115.854  | LOC_Os05g20840.1 |
| DG <sub>HPU</sub> | Os048583_01 | S3 | -0.944 | 0.000  | P | 323.961  | P | 168.400  | P | 200.388  | LOC_Os01g67670.1 |
| DG <sub>HPU</sub> | Os048884_01 | S3 | 0.000  | 1.336  | P | 222.175  | P | 218.583  | P | 86.593   | LOC_Os10g02390.1 |
| DG <sub>HPU</sub> | Os049029_01 | S3 | -1.583 | 0.000  | P | 441.412  | P | 147.370  | P | 129.003  | LOC_Os02g46770.1 |
| DG <sub>HPU</sub> | Os049068_01 | S3 | 0.000  | -0.974 | P | 245.442  | P | 356.993  | P | 701.204  | -                |
| DG <sub>HPU</sub> | Os050258_01 | S3 | 0.000  | -1.082 | P | 365.103  | P | 434.586  | P | 920.167  | LOC_Os12g22230.1 |
| DG <sub>HPU</sub> | Os050266_01 | S3 | 0.000  | 1.448  | P | 535.871  | P | 640.785  | P | 234.794  | LOC_Os04g43720.1 |
| DG <sub>HPU</sub> | Os051181_01 | S3 | 1.230  | 0.000  | P | 539.589  | P | 1265.729 | P | 1556.903 | -                |
| DG <sub>HPU</sub> | Os051254_01 | S3 | 1.186  | 0.000  | P | 535.026  | P | 1216.970 | P | 1641.699 | -                |
| DG <sub>HPU</sub> | Os051919_01 | S3 | -0.989 | 0.000  | P | 2059.416 | P | 1037.692 | P | 926.877  | LOC_Os12g02310.1 |
| DG <sub>HPU</sub> | Os052029_01 | S3 | 0.000  | 1.301  | P | 823.476  | P | 752.405  | P | 305.399  | LOC_Os07g42300.1 |
| DG <sub>HPU</sub> | Os052072_01 | S3 | 0.000  | 1.712  | P | 267.102  | P | 325.225  | P | 99.261   | LOC_Os12g26290.2 |

|                   |             |    |        |        |   |          |   |          |   |          |                  |
|-------------------|-------------|----|--------|--------|---|----------|---|----------|---|----------|------------------|
| DG <sub>HPU</sub> | Os052088_01 | S3 | 0.000  | 1.322  | P | 437.479  | P | 472.228  | P | 188.921  | LOC_Os03g14630.1 |
| DG <sub>HPU</sub> | Os052160_01 | S3 | 0.000  | 1.866  | P | 597.229  | P | 804.094  | P | 220.657  | LOC_Os01g58420.1 |
| DG <sub>HPU</sub> | Os052183_01 | S3 | 0.000  | 1.460  | P | 340.411  | P | 325.161  | P | 118.178  | LOC_Os01g66960.1 |
| DG <sub>HPU</sub> | Os052213_01 | S3 | 0.000  | -1.025 | P | 1052.653 | P | 631.566  | P | 1285.526 | LOC_Os01g22900.1 |
| DG <sub>HPU</sub> | Os052280_01 | S3 | 0.000  | 1.274  | P | 791.701  | P | 962.444  | P | 397.892  | LOC_Os03g29260.2 |
| DG <sub>HPU</sub> | Os052435_01 | S3 | -0.918 | 0.000  | P | 540.270  | P | 286.017  | P | 194.799  | -                |
| DG <sub>HPU</sub> | Os052475_01 | S3 | 0.000  | 1.619  | P | 282.647  | P | 446.674  | P | 145.441  | LOC_Os02g47000.1 |
| DG <sub>HPU</sub> | Os052484_01 | S3 | 1.126  | 2.389  | P | 1113.419 | P | 2429.760 | P | 463.762  | LOC_Os02g20360.1 |
| DG <sub>HPU</sub> | Os052507_01 | S3 | 0.000  | 1.402  | P | 422.956  | P | 373.129  | P | 141.145  | LOC_Os05g06350.1 |
| DG <sub>HPU</sub> | Os052535_01 | S3 | 0.000  | -1.143 | P | 1172.922 | P | 770.709  | P | 1702.609 | LOC_Os03g54160.2 |
| DG <sub>HPU</sub> | Os052753_01 | S3 | 0.000  | 1.294  | P | 203.764  | P | 250.525  | P | 102.137  | LOC_Os03g25770.2 |
| DG <sub>HPU</sub> | Os052801_01 | S3 | 0.000  | 1.432  | P | 294.249  | P | 238.045  | P | 88.233   | LOC_Os07g46350.1 |
| DG <sub>HPU</sub> | Os052844_01 | S3 | 0.000  | 1.958  | P | 949.063  | P | 1167.342 | P | 300.549  | -                |
| DG <sub>HPU</sub> | Os053269_01 | S3 | 0.000  | 1.750  | P | 437.998  | P | 484.606  | P | 144.069  | LOC_Os05g46620.1 |
| DG <sub>HPU</sub> | Os053550_01 | S3 | 0.000  | 1.851  | P | 730.808  | P | 752.229  | P | 208.489  | LOC_Os03g56370.1 |
| DG <sub>HPU</sub> | Os053642_01 | S3 | 0.000  | 1.472  | P | 301.888  | P | 422.672  | P | 152.336  | LOC_Os01g67490.2 |
| DG <sub>HPU</sub> | Os053967_01 | S3 | 0.000  | -1.142 | P | 869.929  | P | 855.616  | P | 1888.722 | LOC_Os01g05850.1 |
| DG <sub>HPU</sub> | Os054260_01 | S3 | 0.000  | 1.550  | P | 243.572  | P | 290.409  | P | 99.143   | LOC_Os04g14790.1 |
| DG <sub>HPU</sub> | Os054377_01 | S3 | 0.000  | 1.705  | P | 324.865  | P | 440.790  | P | 135.191  | LOC_Os05g31140.1 |
| DG <sub>HPU</sub> | Os054590_01 | S3 | 1.153  | 0.000  | P | 365.466  | P | 812.621  | P | 778.981  | LOC_Os03g09250.2 |
| DG <sub>HPU</sub> | Os054637_01 | S3 | 0.000  | 1.725  | P | 477.672  | P | 550.699  | P | 166.588  | LOC_Os09g26880.1 |
| DG <sub>HPU</sub> | Os054700_01 | S3 | 0.000  | 1.699  | P | 3586.978 | P | 4377.187 | P | 1348.555 | LOC_Os07g44330.2 |
| DG <sub>HPU</sub> | Os054724_01 | S3 | 0.000  | 1.476  | P | 717.453  | P | 647.052  | P | 232.587  | LOC_Os09g35730.1 |
| DG <sub>HPU</sub> | Os054730_01 | S3 | 0.000  | 2.002  | P | 554.886  | P | 622.073  | P | 155.340  | LOC_Os05g01050.2 |
| DG <sub>HPU</sub> | Os054747_01 | S3 | 0.000  | 1.932  | P | 340.192  | P | 492.696  | P | 129.089  | LOC_Os05g06270.1 |
| DG <sub>HPU</sub> | Os054752_01 | S3 | 0.000  | 1.276  | P | 2695.788 | P | 2017.469 | P | 833.350  | -                |
| DG <sub>HPU</sub> | Os054785_01 | S3 | 0.000  | 1.267  | P | 1613.848 | P | 1227.024 | P | 509.900  | LOC_Os01g09220.1 |
| DG <sub>HPU</sub> | Os054974_01 | S3 | 0.000  | 2.118  | P | 359.759  | P | 446.569  | P | 102.906  | -                |
| DG <sub>HPU</sub> | Os054975_01 | S3 | 0.000  | 1.423  | P | 330.309  | P | 263.505  | P | 98.241   | LOC_Os04g33990.1 |
| DG <sub>HPU</sub> | Os055027_01 | S3 | 0.000  | 1.439  | P | 258.400  | P | 280.606  | P | 103.521  | LOC_Os04g52460.1 |
| DG <sub>HPU</sub> | Os055071_01 | S3 | 0.000  | 1.752  | P | 488.719  | P | 527.948  | P | 156.754  | LOC_Os10g10500.1 |



|                   |                    |    |                  |        |          |                  |                   |              |   |                   |                  |
|-------------------|--------------------|----|------------------|--------|----------|------------------|-------------------|--------------|---|-------------------|------------------|
| DG <sub>HPU</sub> | Os055094_01        | S3 | 0.000            | 1.439  | P        | 432.152          | P                 | 486.738      | P | 179.534           | LOC_Os07g14590.1 |
| DG <sub>HPU</sub> | Os055100_01        | S3 | 0.000            | 1.540  | P        | 290.115          | P                 | 352.962      | P | 121.352           | LOC_Os01g69940.1 |
| DG <sub>HPU</sub> | Os055116_01        | S3 | 0.000            | 1.877  | P        | 215.859          | P                 | 262.145      | P | 71.355            | LOC_Os10g17770.1 |
| DG <sub>HPU</sub> | Os055122_01        | S3 | 0.000            | 1.437  | P        | 484.925          | P                 | 429.800      | P | 158.775           | LOC_Os04g42380.1 |
| DG <sub>HPU</sub> | Os055198_01        | S3 | 1.169            | 0.000  | P        | 223.927          | P                 | 503.493      | P | 464.234           | LOC_Os04g46980.1 |
| DG <sub>HPU</sub> | Os055253_01        | S3 | 0.000            | 1.279  | P        | 266.385          | P                 | 340.585      | P | 140.342           | -                |
| DG <sub>HPU</sub> | Os055308_01        | S3 | 10.000           | 1.940  | A        | 330.660          | P                 | 621.442      | P | 161.931           | LOC_Os07g48020.1 |
| DG <sub>HPU</sub> | Os055417_02        | S3 | 0.000            | 1.512  | P        | 369.646          | P                 | 423.220      | P | 148.423           | -                |
| DG <sub>HPU</sub> | Os055679_01        | S3 | 0.000            | 1.419  | P        | 407.311          | P                 | 498.655      | P | 186.530           | LOC_Os01g12270.1 |
| DG <sub>HPU</sub> | Os055763_01        | S3 | 0.000            | 1.473  | P        | 898.122          | P                 | 736.847      | P | 265.413           | -                |
| DG <sub>HPU</sub> | Os055855_01        | S3 | 0.000            | 1.579  | P        | 271.274          | P                 | 345.031      | P | 115.494           | LOC_Os01g70930.1 |
| DG <sub>HPU</sub> | Os056478_01        | S3 | 1.144            | 0.000  | P        | 137.719          | P                 | 304.362      | P | 251.859           | LOC_Os07g02000.1 |
| DG <sub>HPU</sub> | Os056914_02        | S3 | 1.541            | 0.000  | P        | 263.045          | P                 | 765.441      | P | 704.520           | LOC_Os03g51600.1 |
| DG <sub>HPU</sub> | Os056919_02        | S3 | -1.240           | 0.000  | P        | 473.297          | P                 | 200.363      | P | 152.053           | -                |
| DG <sub>HPU</sub> | Os056921_02        | S3 | 0.000            | 1.366  | P        | 289.114          | P                 | 313.278      | P | 121.562           | -                |
| DG <sub>HPU</sub> | Os056923_02        | S3 | 1.484            | 0.000  | P        | 105.706          | P                 | 295.766      | P | 307.351           | LOC_Os02g06584.2 |
| DG <sub>HPU</sub> | Os056940_02        | S3 | 1.433            | 0.000  | P        | 106.182          | P                 | 286.725      | P | 263.477           | -                |
| DG <sub>HPU</sub> | Os057173_02        | S3 | 10.000           | -1.212 | A        | 171.859          | P                 | 249.794      | P | 578.593           | LOC_Os12g37260.1 |
| DG <sub>HPU</sub> | Os057211_02        | S3 | 1.270            | 0.000  | P        | 187.219          | P                 | 451.530      | P | 306.597           | LOC_Os01g05970.1 |
| DG <sub>HPU</sub> | Os057284_02        | S3 | 1.156            | 0.000  | P        | 310.805          | P                 | 692.596      | P | 559.044           | LOC_Os07g02800.3 |
| DG <sub>HPU</sub> | Os057402_02        | S3 | 10.000           | 1.764  | A        | 435.279          | P                 | 454.841      | P | 133.942           | -                |
| DG <sub>HPU</sub> | GeneID             | S6 | log2(Ratio(L/9)) |        |          | log2(Ratio(L/P)) | Fi.leaf_9311.flag | Fi.leaf_9311 |   | Fi.leaf_LYP9.flag | Fi.leaf_LYP9     |
|                   | Fi.leaf_PA64s.flag |    | Fi.leaf_PA64s    |        | TIGR5.id |                  |                   |              |   |                   |                  |
| DG <sub>HPU</sub> | Os000062_01        | S6 | -1.259           | 0.000  | P        | 560.776          | P                 | 234.324      | P | 324.987           | LOC_Os01g55570.1 |
| DG <sub>HPU</sub> | Os000111_01        | S6 | 0.000            | 1.142  | P        | 298.687          | P                 | 335.534      | P | 152.079           | LOC_Os11g32880.1 |
| DG <sub>HPU</sub> | Os000152_01        | S6 | -1.017           | 0.000  | P        | 759.778          | P                 | 375.376      | P | 615.459           | LOC_Os02g49680.1 |
| DG <sub>HPU</sub> | Os000254_01        | S6 | -1.088           | 0.000  | P        | 25731.349        | P                 | 12107.660    | P | 16646.660         | -                |
| DG <sub>HPU</sub> | Os000271_01        | S6 | -1.094           | 0.000  | P        | 512.264          | P                 | 240.054      | P | 254.452           | LOC_Os02g22100.7 |
| DG <sub>HPU</sub> | Os000429_01        | S6 | 1.076            | 1.115  | P        | 254.715          | P                 | 537.056      | P | 248.024           | LOC_Os01g68770.1 |
| DG <sub>HPU</sub> | Os000445_01        | S6 | 0.962            | 0.000  | P        | 449.403          | P                 | 875.559      | P | 517.017           | LOC_Os01g37910.1 |
| DG <sub>HPU</sub> | Os000548_01        | S6 | -0.994           | 0.000  | P        | 558.767          | P                 | 280.491      | P | 398.197           | LOC_Os07g09040.1 |

|                   |             |    |        |        |   |          |   |          |   |          |                  |
|-------------------|-------------|----|--------|--------|---|----------|---|----------|---|----------|------------------|
| DG <sub>HPU</sub> | Os000862_01 | S6 | 10.000 | -1.054 | A | 146.160  | P | 300.086  | P | 623.162  | LOC_Os07g25440.2 |
| DG <sub>HPU</sub> | Os000918_01 | S6 | 0.000  | -0.957 | P | 383.363  | P | 226.494  | P | 439.790  | LOC_Os11g44960.1 |
| DG <sub>HPU</sub> | Os001011_01 | S6 | -1.205 | 0.000  | P | 795.638  | P | 345.239  | P | 507.951  | LOC_Os02g43670.1 |
| DG <sub>HPU</sub> | Os001096_01 | S6 | 0.000  | -0.829 | P | 191.799  | P | 160.145  | P | 284.404  | LOC_Os12g06670.1 |
| DG <sub>HPU</sub> | Os001220_01 | S6 | 0.000  | 0.957  | P | 450.280  | P | 445.988  | P | 229.753  | LOC_Os06g21110.1 |
| DG <sub>HPU</sub> | Os001579_01 | S6 | 0.940  | 0.000  | P | 1043.764 | P | 2002.795 | P | 1258.075 | LOC_Os10g36170.1 |
| DG <sub>HPU</sub> | Os001682_01 | S6 | -1.073 | 0.000  | P | 1175.180 | P | 558.595  | P | 717.592  | -                |
| DG <sub>HPU</sub> | Os001884_01 | S6 | 2.445  | 1.856  | P | 239.627  | P | 1304.415 | P | 360.215  | LOC_Os03g60580.1 |
| DG <sub>HPU</sub> | Os001958_01 | S6 | -1.509 | -1.252 | P | 2433.061 | P | 854.770  | P | 2036.470 | LOC_Os02g37060.1 |
| DG <sub>HPU</sub> | Os002058_01 | S6 | 0.000  | -0.895 | P | 183.564  | P | 147.513  | P | 274.390  | LOC_Os07g38790.1 |
| DG <sub>HPU</sub> | Os002360_01 | S6 | -1.301 | 0.000  | P | 980.832  | P | 398.143  | P | 617.984  | LOC_Os01g72260.1 |
| DG <sub>HPU</sub> | Os002417_01 | S6 | -1.002 | 10.000 | P | 377.206  | P | 188.300  | A | 110.693  | LOC_Os06g10780.1 |
| DG <sub>HPU</sub> | Os002532_01 | S6 | 0.990  | 0.000  | P | 179.319  | P | 356.120  | P | 249.596  | LOC_Os03g60260.1 |
| DG <sub>HPU</sub> | Os002648_01 | S6 | -1.029 | 0.000  | P | 9020.910 | P | 4419.306 | P | 7505.961 | LOC_Os08g32060.1 |
| DG <sub>HPU</sub> | Os002743_01 | S6 | -1.172 | 0.000  | P | 519.197  | P | 230.432  | P | 335.950  | LOC_Os03g28080.1 |
| DG <sub>HPU</sub> | Os002918_01 | S6 | 0.000  | -0.866 | P | 952.518  | P | 681.060  | P | 1241.623 | LOC_Os05g38680.1 |
| DG <sub>HPU</sub> | Os002979_01 | S6 | -0.929 | 0.000  | P | 551.147  | P | 289.448  | P | 391.929  | -                |
| DG <sub>HPU</sub> | Os003024_01 | S6 | 10.000 | -0.777 | A | 170.085  | P | 697.789  | P | 1196.067 | LOC_Os01g07520.1 |
| DG <sub>HPU</sub> | Os003691_01 | S6 | 0.000  | -0.785 | P | 1462.657 | P | 1632.120 | P | 2813.177 | LOC_Os12g31460.1 |
| DG <sub>HPU</sub> | Os003776_01 | S6 | 0.938  | 0.000  | P | 2700.149 | P | 5172.519 | P | 4819.137 | LOC_Os12g38290.1 |
| DG <sub>HPU</sub> | Os003879_01 | S6 | 1.077  | 0.000  | P | 354.477  | P | 747.907  | P | 517.021  | LOC_Os02g30110.1 |
| DG <sub>HPU</sub> | Os003956_02 | S6 | -1.044 | 10.000 | P | 357.634  | P | 173.476  | A | 93.235   | -                |
| DG <sub>HPU</sub> | Os004399_01 | S6 | -1.517 | 10.000 | P | 1889.798 | P | 660.314  | A | 62.993   | LOC_Os02g40180.1 |
| DG <sub>HPU</sub> | Os004826_01 | S6 | -1.236 | -0.821 | P | 943.156  | P | 400.432  | P | 707.546  | LOC_Os02g13890.1 |
| DG <sub>HPU</sub> | Os006842_01 | S6 | -1.401 | 0.000  | P | 501.646  | P | 190.020  | P | 318.112  | LOC_Os01g45274.4 |
| DG <sub>HPU</sub> | Os007273_01 | S6 | -1.094 | 0.000  | P | 501.316  | P | 234.899  | P | 359.118  | LOC_Os03g05920.1 |
| DG <sub>HPU</sub> | Os008199_01 | S6 | -1.349 | 0.000  | P | 535.949  | P | 210.436  | P | 259.243  | LOC_Os11g44990.1 |
| DG <sub>HPU</sub> | Os008411_01 | S6 | 0.930  | 1.168  | P | 627.323  | P | 1194.836 | P | 531.610  | LOC_Os09g38560.1 |
| DG <sub>HPU</sub> | Os008548_01 | S6 | 2.198  | 2.138  | P | 326.677  | P | 1499.454 | P | 340.662  | LOC_Os03g02190.1 |
| DG <sub>HPU</sub> | Os008620_01 | S6 | 0.000  | -0.911 | P | 887.647  | P | 792.749  | P | 1491.093 | LOC_Os02g17920.1 |
| DG <sub>HPU</sub> | Os008685_01 | S6 | 0.000  | -1.298 | P | 522.965  | P | 334.402  | P | 822.499  | -                |

|                   |             |    |        |        |   |          |   |          |   |          |                  |
|-------------------|-------------|----|--------|--------|---|----------|---|----------|---|----------|------------------|
| DG <sub>HPU</sub> | Os008721_01 | S6 | 0.000  | 0.810  | P | 261.362  | P | 262.743  | P | 149.895  | LOC_Os03g17740.1 |
| DG <sub>HPU</sub> | Os008761_01 | S6 | 1.568  | 0.852  | P | 277.192  | P | 821.580  | P | 455.044  | LOC_Os02g32580.1 |
| DG <sub>HPU</sub> | Os008866_01 | S6 | -1.042 | 0.000  | P | 663.827  | P | 322.341  | P | 433.367  | LOC_Os10g10180.1 |
| DG <sub>HPU</sub> | Os008979_01 | S6 | 0.000  | -1.194 | P | 4743.524 | P | 3003.002 | P | 6868.550 | LOC_Os01g17170.1 |
| DG <sub>HPU</sub> | Os008980_01 | S6 | -0.948 | 0.000  | P | 877.189  | P | 454.557  | P | 657.515  | LOC_Os08g10450.1 |
| DG <sub>HPU</sub> | Os009063_01 | S6 | 0.000  | 1.636  | P | 365.632  | P | 551.532  | P | 177.416  | LOC_Os04g43650.2 |
| DG <sub>HPU</sub> | Os009237_01 | S6 | -1.048 | 0.000  | P | 856.135  | P | 414.058  | P | 501.311  | LOC_Os12g08830.1 |
| DG <sub>HPU</sub> | Os009268_01 | S6 | 0.000  | 1.137  | P | 169.835  | P | 310.740  | P | 141.268  | LOC_Os01g43851.1 |
| DG <sub>HPU</sub> | Os009448_01 | S6 | -1.081 | 0.000  | P | 2503.818 | P | 1183.162 | P | 1892.630 | LOC_Os08g02630.1 |
| DG <sub>HPU</sub> | Os009532_01 | S6 | 0.000  | -1.007 | P | 2109.952 | P | 1899.473 | P | 3818.349 | LOC_Os07g08030.1 |
| DG <sub>HPU</sub> | Os009556_01 | S6 | 0.000  | 0.938  | P | 3686.721 | P | 4565.590 | P | 2383.468 | LOC_Os03g59320.1 |
| DG <sub>HPU</sub> | Os009558_01 | S6 | -1.146 | 0.000  | P | 377.090  | P | 170.367  | P | 248.840  | LOC_Os06g49160.1 |
| DG <sub>HPU</sub> | Os009631_01 | S6 | 1.137  | 0.000  | P | 204.124  | P | 448.778  | P | 332.140  | LOC_Os12g04150.1 |
| DG <sub>HPU</sub> | Os009705_01 | S6 | 1.160  | 0.000  | P | 408.486  | P | 912.777  | P | 538.223  | LOC_Os03g05280.1 |
| DG <sub>HPU</sub> | Os009738_01 | S6 | 0.000  | 0.992  | P | 644.184  | P | 961.023  | P | 483.085  | LOC_Os11g34720.1 |
| DG <sub>HPU</sub> | Os009800_01 | S6 | 0.000  | 0.912  | P | 232.516  | P | 254.712  | P | 135.325  | LOC_Os03g54050.1 |
| DG <sub>HPU</sub> | Os009883_01 | S6 | -1.035 | -1.153 | P | 5223.447 | P | 2548.624 | P | 5665.987 | LOC_Os02g51080.1 |
| DG <sub>HPU</sub> | Os009986_01 | S6 | 0.957  | 1.090  | P | 672.310  | P | 1305.369 | P | 613.267  | -                |
| DG <sub>HPU</sub> | Os010031_01 | S6 | 1.056  | 0.000  | P | 413.266  | P | 859.284  | P | 715.063  | LOC_Os11g18940.1 |
| DG <sub>HPU</sub> | Os010109_01 | S6 | -1.023 | 0.000  | P | 1198.272 | P | 589.626  | P | 994.379  | LOC_Os02g55060.2 |
| DG <sub>HPU</sub> | Os010115_01 | S6 | -1.103 | 0.000  | P | 573.229  | P | 266.957  | P | 373.354  | LOC_Os09g36040.1 |
| DG <sub>HPU</sub> | Os010135_01 | S6 | 0.000  | -0.854 | P | 135.155  | P | 152.700  | P | 276.089  | -                |
| DG <sub>HPU</sub> | Os010171_01 | S6 | 0.000  | 1.367  | P | 225.578  | P | 300.730  | P | 116.627  | -                |
| DG <sub>HPU</sub> | Os010179_01 | S6 | -0.955 | 0.000  | P | 250.825  | P | 129.370  | P | 137.200  | LOC_Os09g30410.1 |
| DG <sub>HPU</sub> | Os010486_01 | S6 | 0.000  | 0.883  | P | 218.180  | P | 358.602  | P | 194.431  | -                |
| DG <sub>HPU</sub> | Os010517_01 | S6 | 0.000  | -0.803 | P | 259.324  | P | 193.958  | P | 338.375  | LOC_Os08g16830.1 |
| DG <sub>HPU</sub> | Os010586_01 | S6 | -0.930 | 0.000  | P | 2798.318 | P | 1468.446 | P | 2350.452 | LOC_Os10g41720.1 |
| DG <sub>HPU</sub> | Os010653_01 | S6 | 0.987  | 0.000  | P | 166.376  | P | 329.665  | P | 291.379  | LOC_Os12g44180.1 |
| DG <sub>HPU</sub> | Os010804_01 | S6 | 1.061  | 0.000  | P | 568.235  | P | 1185.553 | P | 919.614  | LOC_Os02g54140.1 |
| DG <sub>HPU</sub> | Os010883_01 | S6 | 1.459  | 1.344  | P | 179.242  | P | 492.655  | P | 194.133  | LOC_Os03g19290.1 |
| DG <sub>HPU</sub> | Os010912_01 | S6 | 0.000  | 1.503  | P | 468.809  | P | 663.254  | P | 233.965  | LOC_Os06g23870.1 |

|                   |             |    |        |        |   |           |   |           |   |           |                  |
|-------------------|-------------|----|--------|--------|---|-----------|---|-----------|---|-----------|------------------|
| DG <sub>HPU</sub> | Os010924_01 | S6 | 1.406  | 1.758  | P | 869.874   | P | 2305.016  | P | 681.592   | LOC_Os09g39940.1 |
| DG <sub>HPU</sub> | Os010942_01 | S6 | 1.143  | 1.212  | P | 883.619   | P | 1951.001  | P | 842.289   | LOC_Os06g44180.1 |
| DG <sub>HPU</sub> | Os010946_01 | S6 | 0.000  | -0.931 | P | 231.803   | P | 143.846   | P | 274.223   | LOC_Os03g17200.1 |
| DG <sub>HPU</sub> | Os011001_01 | S6 | 1.033  | 1.074  | P | 409.850   | P | 838.444   | P | 398.333   | LOC_Os05g46480.4 |
| DG <sub>HPU</sub> | Os011754_01 | S6 | 1.083  | 0.000  | P | 114.759   | P | 243.039   | P | 205.882   | LOC_Os05g09380.3 |
| DG <sub>HPU</sub> | Os011915_01 | S6 | 0.000  | -0.959 | P | 373.203   | P | 349.342   | P | 679.340   | LOC_Os05g49800.1 |
| DG <sub>HPU</sub> | Os011997_01 | S6 | 1.061  | 10.000 | P | 143.615   | P | 299.644   | A | 329.856   | LOC_Os10g32348.1 |
| DG <sub>HPU</sub> | Os012023_01 | S6 | 0.000  | 1.266  | P | 245.150   | P | 323.080   | P | 134.375   | LOC_Os02g14770.3 |
| DG <sub>HPU</sub> | Os012086_01 | S6 | -1.243 | -0.783 | P | 1083.916  | P | 458.010   | P | 788.367   | LOC_Os06g44890.1 |
| DG <sub>HPU</sub> | Os012098_01 | S6 | -1.003 | 10.000 | P | 336.642   | P | 168.009   | A | 126.357   | LOC_Os08g38990.3 |
| DG <sub>HPU</sub> | Os012135_01 | S6 | 0.000  | 1.036  | P | 310.727   | P | 325.674   | P | 158.814   | LOC_Os04g35280.1 |
| DG <sub>HPU</sub> | Os012343_01 | S6 | 0.992  | 0.000  | P | 222.027   | P | 441.652   | P | 438.207   | LOC_Os02g46460.1 |
| DG <sub>HPU</sub> | Os012369_01 | S6 | 1.184  | 0.000  | P | 177.033   | P | 402.201   | P | 251.406   | LOC_Os10g07229.1 |
| DG <sub>HPU</sub> | Os012444_01 | S6 | 0.000  | 0.805  | P | 176.047   | P | 232.380   | P | 132.988   | LOC_Os03g21030.1 |
| DG <sub>HPU</sub> | Os012465_01 | S6 | 0.000  | 0.906  | P | 304.002   | P | 435.617   | P | 232.521   | LOC_Os02g46962.3 |
| DG <sub>HPU</sub> | Os012472_01 | S6 | 0.000  | 1.024  | P | 301.973   | P | 514.365   | P | 252.885   | LOC_Os02g35190.2 |
| DG <sub>HPU</sub> | Os012547_01 | S6 | -0.964 | 0.000  | P | 1317.752  | P | 675.549   | P | 773.507   | LOC_Os02g10350.1 |
| DG <sub>HPU</sub> | Os012869_01 | S6 | -1.652 | -0.855 | P | 829.210   | P | 263.785   | P | 477.116   | LOC_Os02g08230.1 |
| DG <sub>HPU</sub> | Os013023_01 | S6 | 1.088  | 0.000  | P | 213.387   | P | 453.671   | P | 316.339   | LOC_Os06g24730.1 |
| DG <sub>HPU</sub> | Os013150_01 | S6 | 0.000  | 0.863  | P | 224.440   | P | 194.698   | P | 107.060   | -                |
| DG <sub>HPU</sub> | Os013232_01 | S6 | 0.000  | -0.925 | P | 3312.898  | P | 3125.074  | P | 5933.504  | LOC_Os03g56280.1 |
| DG <sub>HPU</sub> | Os013283_01 | S6 | 0.000  | -0.853 | P | 268.135   | P | 184.195   | P | 332.807   | LOC_Os05g33280.1 |
| DG <sub>HPU</sub> | Os013356_01 | S6 | 10.000 | -1.314 | A | 80.158    | P | 227.187   | P | 564.782   | LOC_Os07g40974.1 |
| DG <sub>HPU</sub> | Os013388_01 | S6 | 0.000  | 0.822  | P | 2368.781  | P | 2581.667  | P | 1460.468  | LOC_Os01g07120.2 |
| DG <sub>HPU</sub> | Os013389_01 | S6 | 0.000  | 0.978  | P | 579.333   | P | 835.772   | P | 424.167   | LOC_Os09g36220.1 |
| DG <sub>HPU</sub> | Os013398_01 | S6 | -1.142 | -0.839 | P | 889.810   | P | 403.279   | P | 721.401   | LOC_Os03g20700.2 |
| DG <sub>HPU</sub> | Os013494_01 | S6 | 0.000  | -0.767 | P | 752.844   | P | 742.187   | P | 1263.160  | LOC_Os04g21790.1 |
| DG <sub>HPU</sub> | Os013529_01 | S6 | 0.000  | 0.903  | P | 368.025   | P | 423.039   | P | 226.262   | -                |
| DG <sub>HPU</sub> | Os013712_01 | S6 | -1.049 | -0.882 | P | 24514.019 | P | 11848.624 | P | 21842.493 | LOC_Os09g26810.1 |
| DG <sub>HPU</sub> | Os013775_01 | S6 | 0.000  | -0.821 | P | 151.131   | P | 178.407   | P | 315.202   | LOC_Os01g48930.1 |
| DG <sub>HPU</sub> | Os013863_01 | S6 | 0.952  | 10.000 | P | 95.654    | P | 185.090   | A | 198.743   | LOC_Os01g07700.3 |

|                   |             |    |        |        |   |          |   |          |   |          |                  |
|-------------------|-------------|----|--------|--------|---|----------|---|----------|---|----------|------------------|
| DG <sub>HPU</sub> | Os013891_01 | S6 | 1.098  | 0.000  | P | 134.613  | P | 288.161  | P | 256.561  | LOC_Os12g18110.1 |
| DG <sub>HPU</sub> | Os013937_01 | S6 | -0.908 | 0.000  | P | 881.349  | P | 469.541  | P | 550.830  | LOC_Os05g07860.1 |
| DG <sub>HPU</sub> | Os014048_01 | S6 | -0.952 | 0.000  | P | 348.720  | P | 180.306  | P | 167.442  | LOC_Os07g29240.1 |
| DG <sub>HPU</sub> | Os014072_01 | S6 | -1.018 | 0.000  | P | 592.917  | P | 292.799  | P | 378.734  | LOC_Os01g46760.1 |
| DG <sub>HPU</sub> | Os014249_01 | S6 | -1.062 | 0.000  | P | 498.698  | P | 238.858  | P | 325.112  | LOC_Os06g28194.1 |
| DG <sub>HPU</sub> | Os014269_01 | S6 | 0.000  | -1.151 | P | 680.864  | P | 417.218  | P | 926.681  | LOC_Os01g68450.1 |
| DG <sub>HPU</sub> | Os014285_01 | S6 | 0.000  | -0.840 | P | 619.683  | P | 459.815  | P | 823.074  | LOC_Os08g14440.2 |
| DG <sub>HPU</sub> | Os014320_01 | S6 | -0.928 | 0.000  | P | 827.872  | P | 435.062  | P | 388.942  | LOC_Os03g17570.3 |
| DG <sub>HPU</sub> | Os014410_01 | S6 | 0.000  | -0.899 | P | 465.395  | P | 381.940  | P | 711.988  | LOC_Os08g23410.1 |
| DG <sub>HPU</sub> | Os014505_01 | S6 | 0.000  | 1.152  | P | 341.148  | P | 566.039  | P | 254.630  | LOC_Os03g37830.1 |
| DG <sub>HPU</sub> | Os014988_01 | S6 | 0.000  | 0.886  | P | 251.811  | P | 405.429  | P | 219.421  | LOC_Os12g09300.1 |
| DG <sub>HPU</sub> | Os015774_01 | S6 | 0.000  | -0.771 | P | 195.091  | P | 182.865  | P | 312.107  | LOC_Os05g34010.1 |
| DG <sub>HPU</sub> | Os015775_01 | S6 | 0.000  | -0.827 | P | 341.490  | P | 204.880  | P | 363.354  | LOC_Os07g23410.2 |
| DG <sub>HPU</sub> | Os015790_01 | S6 | 1.166  | 1.182  | P | 572.255  | P | 1283.817 | P | 565.863  | -                |
| DG <sub>HPU</sub> | Os015868_01 | S6 | 1.145  | 10.000 | P | 140.018  | P | 309.712  | A | 156.144  | LOC_Os03g13540.1 |
| DG <sub>HPU</sub> | Os016064_01 | S6 | 1.014  | 1.142  | P | 182.525  | P | 368.595  | P | 167.019  | LOC_Os03g59180.2 |
| DG <sub>HPU</sub> | Os016131_01 | S6 | 0.000  | 0.821  | P | 419.515  | P | 365.201  | P | 206.669  | LOC_Os07g42500.1 |
| DG <sub>HPU</sub> | Os016155_01 | S6 | 0.000  | 1.024  | P | 550.476  | P | 615.058  | P | 302.524  | LOC_Os02g57600.1 |
| DG <sub>HPU</sub> | Os016235_01 | S6 | 0.000  | 0.914  | P | 330.009  | P | 374.614  | P | 198.809  | LOC_Os02g58150.2 |
| DG <sub>HPU</sub> | Os016238_01 | S6 | -1.055 | 10.000 | P | 451.334  | P | 217.169  | A | 109.435  | LOC_Os08g35740.1 |
| DG <sub>HPU</sub> | Os016615_01 | S6 | 0.000  | -0.813 | P | 1181.221 | P | 1032.525 | P | 1814.283 | LOC_Os11g05050.2 |
| DG <sub>HPU</sub> | Os016657_01 | S6 | 0.000  | 0.870  | P | 1460.167 | P | 1677.296 | P | 917.753  | LOC_Os01g50200.1 |
| DG <sub>HPU</sub> | Os016661_01 | S6 | 0.000  | -0.879 | P | 318.345  | P | 253.186  | P | 465.488  | LOC_Os08g25734.1 |
| DG <sub>HPU</sub> | Os016793_01 | S6 | 0.000  | 0.828  | P | 222.747  | P | 281.011  | P | 158.303  | LOC_Os02g52780.1 |
| DG <sub>HPU</sub> | Os016867_01 | S6 | -1.170 | 0.000  | P | 575.147  | P | 255.553  | P | 319.067  | LOC_Os08g43390.1 |
| DG <sub>HPU</sub> | Os016882_01 | S6 | 0.000  | 0.918  | P | 204.741  | P | 293.189  | P | 155.188  | LOC_Os08g39370.1 |
| DG <sub>HPU</sub> | Os016916_01 | S6 | 10.000 | 1.020  | A | 87.601   | P | 281.765  | P | 138.905  | LOC_Os03g05390.6 |
| DG <sub>HPU</sub> | Os016919_01 | S6 | 1.885  | 1.831  | P | 1172.479 | P | 4330.277 | P | 1217.126 | LOC_Os02g01590.1 |
| DG <sub>HPU</sub> | Os017149_01 | S6 | 0.000  | -0.889 | P | 1427.068 | P | 1394.480 | P | 2582.033 | LOC_Os03g01030.1 |
| DG <sub>HPU</sub> | Os017238_01 | S6 | 0.000  | 0.903  | P | 407.786  | P | 479.260  | P | 256.248  | LOC_Os07g01820.1 |
| DG <sub>HPU</sub> | Os017376_01 | S6 | 1.239  | 0.000  | P | 319.155  | P | 753.139  | P | 531.473  | LOC_Os07g48100.1 |

|                   |             |    |        |        |   |          |   |          |   |          |                  |
|-------------------|-------------|----|--------|--------|---|----------|---|----------|---|----------|------------------|
| DG <sub>HPU</sub> | Os017409_01 | S6 | -0.984 | 0.000  | P | 3956.018 | P | 2000.162 | P | 1973.130 | LOC_Os12g01449.1 |
| DG <sub>HPU</sub> | Os017440_01 | S6 | 0.000  | -0.819 | P | 239.385  | P | 231.268  | P | 407.985  | LOC_Os10g01134.1 |
| DG <sub>HPU</sub> | Os017442_01 | S6 | -0.971 | -0.861 | P | 2229.610 | P | 1137.636 | P | 2065.961 | LOC_Os02g20860.1 |
| DG <sub>HPU</sub> | Os017640_01 | S6 | -1.341 | 0.000  | P | 1304.653 | P | 515.167  | P | 821.293  | LOC_Os05g22614.1 |
| DG <sub>HPU</sub> | Os017690_01 | S6 | 0.000  | 0.909  | P | 9479.017 | P | 9279.485 | P | 4942.753 | LOC_Os07g01020.1 |
| DG <sub>HPU</sub> | Os017692_01 | S6 | 0.000  | 0.896  | P | 128.591  | P | 242.817  | P | 130.450  | -                |
| DG <sub>HPU</sub> | Os017944_01 | S6 | -1.282 | -0.846 | P | 5172.282 | P | 2127.702 | P | 3824.578 | LOC_Os04g18090.1 |
| DG <sub>HPU</sub> | Os017954_01 | S6 | 0.998  | 0.000  | P | 187.351  | P | 374.246  | P | 330.098  | LOC_Os08g04840.1 |
| DG <sub>HPU</sub> | Os017967_01 | S6 | 0.000  | -0.836 | P | 208.349  | P | 206.487  | P | 368.702  | LOC_Os05g49880.1 |
| DG <sub>HPU</sub> | Os018024_01 | S6 | 0.000  | -0.788 | P | 193.549  | P | 165.432  | P | 285.628  | LOC_Os03g11960.1 |
| DG <sub>HPU</sub> | Os018042_01 | S6 | 0.000  | 0.931  | P | 624.750  | P | 694.218  | P | 364.002  | LOC_Os02g42940.1 |
| DG <sub>HPU</sub> | Os018085_01 | S6 | 10.000 | 0.869  | A | 128.424  | P | 267.379  | P | 146.404  | LOC_Os01g65660.1 |
| DG <sub>HPU</sub> | Os018086_01 | S6 | 1.014  | 1.063  | P | 336.137  | P | 678.782  | P | 324.802  | -                |
| DG <sub>HPU</sub> | Os018138_01 | S6 | 0.000  | -0.830 | P | 301.788  | P | 223.753  | P | 397.801  | LOC_Os10g36000.2 |
| DG <sub>HPU</sub> | Os018190_01 | S6 | 0.984  | 0.000  | P | 127.063  | P | 251.368  | P | 238.864  | LOC_Os01g43700.2 |
| DG <sub>HPU</sub> | Os018256_01 | S6 | 0.000  | -1.081 | P | 2039.636 | P | 1297.562 | P | 2744.191 | LOC_Os04g53230.1 |
| DG <sub>HPU</sub> | Os018324_01 | S6 | 1.002  | 0.000  | P | 188.865  | P | 378.313  | P | 317.784  | LOC_Os06g01250.1 |
| DG <sub>HPU</sub> | Os018378_01 | S6 | 0.000  | -0.960 | P | 667.122  | P | 712.051  | P | 1385.029 | LOC_Os08g02210.2 |
| DG <sub>HPU</sub> | Os018414_01 | S6 | -1.013 | 10.000 | P | 292.532  | P | 144.904  | A | 102.585  | LOC_Os07g28910.1 |
| DG <sub>HPU</sub> | Os018710_01 | S6 | 0.000  | 1.051  | P | 395.592  | P | 702.005  | P | 338.831  | LOC_Os09g09830.1 |
| DG <sub>HPU</sub> | Os018960_01 | S6 | 0.000  | -0.787 | P | 4576.879 | P | 3054.315 | P | 5270.174 | LOC_Os03g52840.1 |
| DG <sub>HPU</sub> | Os018965_01 | S6 | 0.000  | 0.823  | P | 512.183  | P | 470.546  | P | 265.989  | LOC_Os03g62200.1 |
| DG <sub>HPU</sub> | Os019237_01 | S6 | 0.000  | 1.097  | P | 4150.430 | P | 4947.263 | P | 2312.654 | LOC_Os01g37690.1 |
| DG <sub>HPU</sub> | Os019246_01 | S6 | 1.387  | 10.000 | P | 130.143  | P | 340.427  | A | 500.535  | LOC_Os09g34160.1 |
| DG <sub>HPU</sub> | Os019400_01 | S6 | 0.947  | 0.000  | P | 105.320  | P | 203.074  | P | 221.516  | LOC_Os01g70790.1 |
| DG <sub>HPU</sub> | Os019413_01 | S6 | -1.437 | 0.000  | P | 672.223  | P | 248.276  | P | 343.785  | LOC_Os07g49110.1 |
| DG <sub>HPU</sub> | Os019636_01 | S6 | 0.000  | 0.861  | P | 2736.416 | P | 2636.194 | P | 1451.633 | -                |
| DG <sub>HPU</sub> | Os020145_01 | S6 | 0.000  | -0.936 | P | 677.248  | P | 538.532  | P | 1030.445 | LOC_Os07g22930.3 |
| DG <sub>HPU</sub> | Os020363_01 | S6 | 0.000  | 0.907  | P | 316.567  | P | 327.210  | P | 174.495  | LOC_Os02g21260.1 |
| DG <sub>HPU</sub> | Os020616_01 | S6 | 10.000 | -0.872 | A | 118.728  | P | 187.833  | P | 343.724  | LOC_Os02g53140.1 |
| DG <sub>HPU</sub> | Os020903_01 | S6 | 1.153  | 0.000  | P | 1039.572 | P | 2311.785 | P | 1357.474 | LOC_Os03g17870.1 |

|                   |             |    |        |        |   |          |   |          |   |          |                  |
|-------------------|-------------|----|--------|--------|---|----------|---|----------|---|----------|------------------|
| DG <sub>HPU</sub> | Os020947_01 | S6 | 1.115  | 1.237  | P | 1069.835 | P | 2317.864 | P | 983.278  | LOC_Os03g16500.2 |
| DG <sub>HPU</sub> | Os020962_01 | S6 | 0.000  | 0.827  | P | 525.701  | P | 602.260  | P | 339.537  | LOC_Os10g41930.2 |
| DG <sub>HPU</sub> | Os021189_01 | S6 | 0.000  | -0.887 | P | 263.809  | P | 294.713  | P | 545.206  | LOC_Os01g69080.1 |
| DG <sub>HPU</sub> | Os021454_01 | S6 | 0.000  | 0.841  | P | 732.604  | P | 914.422  | P | 510.377  | LOC_Os03g37970.1 |
| DG <sub>HPU</sub> | Os021455_01 | S6 | 0.000  | 0.860  | P | 716.476  | P | 858.876  | P | 473.189  | LOC_Os03g55820.1 |
| DG <sub>HPU</sub> | Os021583_01 | S6 | 0.000  | -0.831 | P | 669.223  | P | 373.162  | P | 663.839  | LOC_Os04g41870.1 |
| DG <sub>HPU</sub> | Os021728_01 | S6 | 0.000  | 1.012  | P | 1474.825 | P | 1585.555 | P | 786.129  | LOC_Os07g23430.1 |
| DG <sub>HPU</sub> | Os021764_01 | S6 | 0.921  | 0.000  | P | 175.198  | P | 331.663  | P | 259.965  | LOC_Os05g44340.1 |
| DG <sub>HPU</sub> | Os021857_01 | S6 | 0.000  | 0.982  | P | 1253.706 | P | 1223.363 | P | 619.419  | LOC_Os10g41200.1 |
| DG <sub>HPU</sub> | Os021892_01 | S6 | 10.000 | -0.769 | A | 112.733  | P | 147.112  | P | 250.663  | LOC_Os05g07060.1 |
| DG <sub>HPU</sub> | Os021926_01 | S6 | -0.928 | 0.000  | P | 2748.225 | P | 1444.895 | P | 1872.876 | LOC_Os12g41920.3 |
| DG <sub>HPU</sub> | Os021978_01 | S6 | 0.000  | -0.773 | P | 1539.744 | P | 1127.364 | P | 1925.860 | LOC_Os02g39160.1 |
| DG <sub>HPU</sub> | Os022025_01 | S6 | 10.000 | -0.882 | A | 66.199   | P | 194.797  | P | 359.042  | LOC_Os06g34040.1 |
| DG <sub>HPU</sub> | Os022043_01 | S6 | -0.934 | 0.000  | P | 1397.498 | P | 731.524  | P | 1086.227 | LOC_Os03g61920.1 |
| DG <sub>HPU</sub> | Os022098_01 | S6 | 10.000 | -0.809 | A | 96.792   | P | 180.323  | P | 315.894  | LOC_Os01g31940.1 |
| DG <sub>HPU</sub> | Os022158_01 | S6 | 0.000  | 0.840  | P | 203.888  | P | 267.074  | P | 149.156  | LOC_Os01g56470.1 |
| DG <sub>HPU</sub> | Os022183_01 | S6 | -1.610 | -0.898 | P | 2919.922 | P | 956.867  | P | 1782.495 | LOC_Os10g40390.1 |
| DG <sub>HPU</sub> | Os022866_01 | S6 | 0.000  | 0.861  | P | 207.681  | P | 320.507  | P | 176.450  | LOC_Os07g48830.1 |
| DG <sub>HPU</sub> | Os022932_01 | S6 | 0.000  | 0.900  | P | 448.205  | P | 579.568  | P | 310.613  | LOC_Os04g44150.1 |
| DG <sub>HPU</sub> | Os022991_01 | S6 | -1.272 | -1.029 | P | 520.762  | P | 215.623  | P | 440.149  | LOC_Os05g43880.1 |
| DG <sub>HPU</sub> | Os023213_01 | S6 | -1.052 | 0.000  | P | 4833.006 | P | 2330.914 | P | 2856.995 | LOC_Os02g32850.1 |
| DG <sub>HPU</sub> | Os023233_01 | S6 | 1.045  | 0.000  | P | 559.057  | P | 1153.287 | P | 789.995  | LOC_Os01g69140.1 |
| DG <sub>HPU</sub> | Os023378_01 | S6 | -0.930 | 0.000  | P | 1029.622 | P | 540.408  | P | 698.283  | LOC_Os03g46470.1 |
| DG <sub>HPU</sub> | Os023465_01 | S6 | 1.463  | 0.807  | P | 142.604  | P | 393.257  | P | 224.778  | LOC_Os01g37200.1 |
| DG <sub>HPU</sub> | Os023508_01 | S6 | 0.000  | 1.079  | P | 2465.441 | P | 3662.309 | P | 1733.776 | LOC_Os08g04430.1 |
| DG <sub>HPU</sub> | Os024035_01 | S6 | 0.000  | -0.941 | P | 870.851  | P | 468.312  | P | 899.400  | LOC_Os10g02300.3 |
| DG <sub>HPU</sub> | Os024208_01 | S6 | -0.910 | 0.000  | P | 3557.847 | P | 1893.913 | P | 2970.114 | -                |
| DG <sub>HPU</sub> | Os024254_01 | S6 | 1.537  | 1.574  | P | 376.548  | P | 1092.543 | P | 367.002  | LOC_Os09g26780.1 |
| DG <sub>HPU</sub> | Os024551_01 | S6 | 0.000  | 0.806  | P | 290.594  | P | 278.286  | P | 159.119  | -                |
| DG <sub>HPU</sub> | Os024625_01 | S6 | 0.000  | 0.857  | P | 181.534  | P | 260.033  | P | 143.535  | LOC_Os08g25080.1 |
| DG <sub>HPU</sub> | Os024737_01 | S6 | 1.418  | 1.073  | P | 197.309  | P | 527.148  | P | 250.566  | LOC_Os01g01660.1 |

|                   |             |    |        |        |   |          |   |          |   |           |                  |
|-------------------|-------------|----|--------|--------|---|----------|---|----------|---|-----------|------------------|
| DG <sub>HPU</sub> | Os024774_01 | S6 | 0.000  | -0.773 | P | 9767.157 | P | 6368.404 | P | 10885.760 | LOC_Os02g10390.1 |
| DG <sub>HPU</sub> | Os024795_01 | S6 | 0.000  | -1.012 | P | 533.369  | P | 510.550  | P | 1029.885  | LOC_Os08g29170.1 |
| DG <sub>HPU</sub> | Os024813_01 | S6 | 0.000  | -0.843 | P | 313.140  | P | 346.527  | P | 621.705   | LOC_Os06g06560.1 |
| DG <sub>HPU</sub> | Os025052_01 | S6 | 0.000  | -0.785 | P | 570.808  | P | 316.251  | P | 544.808   | LOC_Os01g56570.1 |
| DG <sub>HPU</sub> | Os025509_01 | S6 | 1.129  | 1.042  | P | 337.988  | P | 739.289  | P | 359.061   | LOC_Os05g04690.1 |
| DG <sub>HPU</sub> | Os025789_01 | S6 | 0.000  | 1.062  | P | 1193.787 | P | 2015.199 | P | 965.318   | -                |
| DG <sub>HPU</sub> | Os026125_01 | S6 | 10.000 | -0.800 | A | 106.925  | P | 139.145  | P | 242.232   | LOC_Os03g45779.1 |
| DG <sub>HPU</sub> | Os026131_01 | S6 | 10.000 | -1.267 | A | 122.588  | P | 247.322  | P | 595.074   | LOC_Os04g42870.1 |
| DG <sub>HPU</sub> | Os026571_01 | S6 | 0.000  | -0.997 | P | 957.403  | P | 622.513  | P | 1242.631  | LOC_Os04g35680.1 |
| DG <sub>HPU</sub> | Os026917_01 | S6 | -1.130 | -0.967 | P | 3611.495 | P | 1650.484 | P | 3226.381  | LOC_Os04g52250.1 |
| DG <sub>HPU</sub> | Os027044_01 | S6 | -0.929 | 0.000  | P | 3206.800 | P | 1684.374 | P | 2619.757  | LOC_Os09g15830.1 |
| DG <sub>HPU</sub> | Os027168_01 | S6 | 1.105  | 0.000  | P | 198.771  | P | 427.423  | P | 334.859   | LOC_Os11g41260.1 |
| DG <sub>HPU</sub> | Os027606_01 | S6 | -0.993 | 10.000 | P | 214.555  | P | 107.818  | A | 67.027    | LOC_Os04g51820.1 |
| DG <sub>HPU</sub> | Os027640_01 | S6 | -0.912 | 10.000 | P | 279.486  | P | 148.545  | A | 107.059   | LOC_Os01g70440.1 |
| DG <sub>HPU</sub> | Os027686_01 | S6 | 0.000  | 1.326  | P | 275.084  | P | 494.843  | P | 197.431   | LOC_Os06g04630.1 |
| DG <sub>HPU</sub> | Os028052_01 | S6 | -1.123 | -0.842 | P | 1562.659 | P | 717.344  | P | 1286.183  | LOC_Os06g29370.1 |
| DG <sub>HPU</sub> | Os028344_01 | S6 | -1.049 | 10.000 | P | 311.400  | P | 150.512  | A | 94.938    | LOC_Os01g45970.1 |
| DG <sub>HPU</sub> | Os029902_01 | S6 | 0.000  | 0.966  | P | 919.964  | P | 995.339  | P | 509.414   | LOC_Os09g09850.1 |
| DG <sub>HPU</sub> | Os029927_01 | S6 | -0.917 | 0.000  | P | 1047.031 | P | 554.674  | P | 692.005   | LOC_Os03g31210.1 |
| DG <sub>HPU</sub> | Os030447_01 | S6 | 2.606  | 10.000 | P | 150.190  | P | 914.563  | A | 918.083   | LOC_Os05g06200.1 |
| DG <sub>HPU</sub> | Os031090_01 | S6 | -0.944 | 0.000  | P | 1446.259 | P | 751.597  | P | 691.200   | LOC_Os12g14699.1 |
| DG <sub>HPU</sub> | Os031198_01 | S6 | 0.000  | -0.812 | P | 561.513  | P | 587.519  | P | 1031.587  | LOC_Os02g09750.1 |
| DG <sub>HPU</sub> | Os031283_01 | S6 | -1.154 | 10.000 | P | 875.956  | P | 393.499  | A | 99.087    | LOC_Os09g15400.1 |
| DG <sub>HPU</sub> | Os031452_01 | S6 | 0.000  | 1.004  | P | 217.869  | P | 274.574  | P | 136.863   | LOC_Os04g32820.1 |
| DG <sub>HPU</sub> | Os031850_01 | S6 | -1.088 | 0.000  | P | 3345.547 | P | 1574.290 | P | 1874.713  | LOC_Os01g24940.1 |
| DG <sub>HPU</sub> | Os031910_01 | S6 | 0.994  | 0.000  | P | 332.740  | P | 662.801  | P | 415.457   | -                |
| DG <sub>HPU</sub> | Os032072_01 | S6 | 0.000  | 0.914  | P | 350.581  | P | 428.536  | P | 227.395   | -                |
| DG <sub>HPU</sub> | Os032147_01 | S6 | -1.258 | -1.244 | P | 1414.801 | P | 591.755  | P | 1401.300  | LOC_Os10g10630.1 |
| DG <sub>HPU</sub> | Os032578_01 | S6 | 0.000  | -0.813 | P | 267.152  | P | 189.187  | P | 332.455   | LOC_Os01g39220.1 |
| DG <sub>HPU</sub> | Os033430_01 | S6 | 10.000 | -1.408 | A | 103.885  | P | 265.440  | P | 704.527   | LOC_Os10g22630.1 |
| DG <sub>HPU</sub> | Os033722_01 | S6 | 0.000  | -0.774 | P | 347.305  | P | 278.158  | P | 475.566   | LOC_Os02g32150.1 |



|                   |             |    |        |        |   |           |   |          |   |          |                  |
|-------------------|-------------|----|--------|--------|---|-----------|---|----------|---|----------|------------------|
| DG <sub>HPU</sub> | Os033886_01 | S6 | 0.987  | 0.000  | P | 291.724   | P | 578.189  | P | 606.413  | LOC_Os08g33300.1 |
| DG <sub>HPU</sub> | Os034325_01 | S6 | 0.000  | -0.854 | P | 1220.339  | P | 665.104  | P | 1201.983 | LOC_Os03g10980.1 |
| DG <sub>HPU</sub> | Os034920_01 | S6 | 10.000 | 1.432  | A | 1322.060  | P | 508.974  | P | 188.601  | LOC_Os04g08160.1 |
| DG <sub>HPU</sub> | Os035193_01 | S6 | -1.119 | -0.959 | P | 633.319   | P | 291.545  | P | 566.631  | LOC_Os01g11970.1 |
| DG <sub>HPU</sub> | Os035398_01 | S6 | 0.000  | -0.793 | P | 624.739   | P | 420.027  | P | 727.890  | -                |
| DG <sub>HPU</sub> | Os036231_01 | S6 | -1.047 | -1.100 | P | 2075.205  | P | 1004.491 | P | 2153.040 | LOC_Os03g46200.1 |
| DG <sub>HPU</sub> | Os036325_01 | S6 | 0.972  | 0.000  | P | 895.182   | P | 1756.472 | P | 1739.758 | LOC_Os08g19550.1 |
| DG <sub>HPU</sub> | Os036341_01 | S6 | -0.930 | 10.000 | P | 476.473   | P | 250.003  | A | 79.679   | LOC_Os07g05510.1 |
| DG <sub>HPU</sub> | Os036618_01 | S6 | -2.323 | -1.544 | P | 8401.042  | P | 1678.926 | P | 4896.491 | LOC_Os04g33830.1 |
| DG <sub>HPU</sub> | Os038003_01 | S6 | -0.922 | 0.000  | P | 752.398   | P | 397.115  | P | 372.732  | LOC_Os05g42070.1 |
| DG <sub>HPU</sub> | Os038144_01 | S6 | 0.000  | -0.858 | P | 139.256   | P | 149.977  | P | 271.868  | LOC_Os07g39080.1 |
| DG <sub>HPU</sub> | Os038233_01 | S6 | -1.146 | 0.000  | P | 13494.155 | P | 6097.925 | P | 9614.029 | -                |
| DG <sub>HPU</sub> | Os038407_01 | S6 | 0.000  | 1.358  | P | 192.084   | P | 361.648  | P | 141.076  | LOC_Os09g25690.1 |
| DG <sub>HPU</sub> | Os038448_01 | S6 | 1.174  | 0.000  | P | 325.391   | P | 734.427  | P | 593.978  | LOC_Os11g10890.1 |
| DG <sub>HPU</sub> | Os038478_01 | S6 | -1.412 | 0.000  | P | 531.536   | P | 199.686  | P | 299.763  | LOC_Os01g44390.1 |
| DG <sub>HPU</sub> | Os038480_01 | S6 | -1.060 | 0.000  | P | 1501.286  | P | 719.828  | P | 1134.233 | LOC_Os01g44370.1 |
| DG <sub>HPU</sub> | Os038729_01 | S6 | 1.197  | 0.000  | P | 400.582   | P | 918.608  | P | 700.255  | LOC_Os05g07880.2 |
| DG <sub>HPU</sub> | Os039150_01 | S6 | -0.984 | 10.000 | P | 394.638   | P | 199.492  | A | 53.757   | LOC_Os02g18070.1 |
| DG <sub>HPU</sub> | Os039503_01 | S6 | 0.992  | 0.000  | P | 88.916    | P | 176.793  | P | 149.587  | -                |
| DG <sub>HPU</sub> | Os039580_01 | S6 | -1.488 | 10.000 | P | 852.816   | P | 304.053  | A | 55.119   | LOC_Os02g40180.1 |
| DG <sub>HPU</sub> | Os039696_01 | S6 | 0.000  | 1.030  | P | 307.747   | P | 380.346  | P | 186.312  | LOC_Os07g26900.1 |
| DG <sub>HPU</sub> | Os039971_01 | S6 | 1.823  | 2.246  | P | 560.642   | P | 1982.997 | P | 417.898  | LOC_Os10g26330.1 |
| DG <sub>HPU</sub> | Os040799_01 | S6 | 1.263  | 0.000  | P | 341.779   | P | 820.162  | P | 645.033  | LOC_Os10g25410.1 |
| DG <sub>HPU</sub> | Os041875_01 | S6 | -0.972 | 0.000  | P | 352.526   | P | 179.658  | P | 238.378  | LOC_Os03g47480.1 |
| DG <sub>HPU</sub> | Os042408_01 | S6 | -1.838 | 10.000 | P | 445.623   | P | 124.629  | A | 38.095   | LOC_Os09g29040.1 |
| DG <sub>HPU</sub> | Os042442_01 | S6 | 0.958  | 0.000  | P | 449.480   | P | 873.138  | P | 725.748  | LOC_Os01g23990.1 |
| DG <sub>HPU</sub> | Os042527_01 | S6 | 1.026  | 0.950  | P | 1033.972  | P | 2106.218 | P | 1090.533 | LOC_Os05g28840.1 |
| DG <sub>HPU</sub> | Os042918_01 | S6 | -1.141 | 0.000  | P | 983.017   | P | 445.662  | P | 641.221  | LOC_Os03g31630.1 |
| DG <sub>HPU</sub> | Os043618_01 | S6 | 1.246  | 0.000  | P | 322.821   | P | 765.590  | P | 502.164  | -                |
| DG <sub>HPU</sub> | Os043740_01 | S6 | -1.430 | -0.936 | P | 6581.831  | P | 2443.217 | P | 4673.408 | LOC_Os04g11956.1 |
| DG <sub>HPU</sub> | Os044009_01 | S6 | -1.156 | -1.262 | P | 976.310   | P | 438.128  | P | 1050.476 | LOC_Os03g42200.1 |

|                   |             |    |        |        |   |           |   |          |   |           |                  |
|-------------------|-------------|----|--------|--------|---|-----------|---|----------|---|-----------|------------------|
| DG <sub>HPU</sub> | Os044136_01 | S6 | -0.971 | 0.000  | P | 574.352   | P | 293.040  | P | 482.137   | -                |
| DG <sub>HPU</sub> | Os044239_01 | S6 | -1.231 | 0.000  | P | 17431.737 | P | 7425.924 | P | 11011.481 | LOC_Os06g47690.1 |
| DG <sub>HPU</sub> | Os044283_01 | S6 | 10.000 | -1.154 | A | 35.261    | P | 338.468  | P | 753.046   | -                |
| DG <sub>HPU</sub> | Os044913_01 | S6 | 1.091  | 0.000  | P | 317.196   | P | 675.675  | P | 550.758   | LOC_Os02g27300.1 |
| DG <sub>HPU</sub> | Os045461_01 | S6 | -1.226 | -1.168 | P | 3383.837  | P | 1446.282 | P | 3250.582  | LOC_Os05g48630.2 |
| DG <sub>HPU</sub> | Os045565_01 | S6 | 10.000 | -0.947 | A | 78.868    | P | 534.603  | P | 1030.802  | LOC_Os10g09630.1 |
| DG <sub>HPU</sub> | Os045951_01 | S6 | 1.021  | 10.000 | P | 94.808    | P | 192.375  | A | 173.680   | LOC_Os03g07000.1 |
| DG <sub>HPU</sub> | Os046324_01 | S6 | 0.924  | 10.000 | P | 119.288   | P | 226.293  | A | 133.921   | LOC_Os12g02420.2 |
| DG <sub>HPU</sub> | Os046711_01 | S6 | 2.086  | 10.000 | P | 127.404   | P | 540.762  | A | 199.558   | -                |
| DG <sub>HPU</sub> | Os046888_01 | S6 | 1.187  | 0.000  | P | 544.406   | P | 1239.252 | P | 756.163   | LOC_Os03g25460.1 |
| DG <sub>HPU</sub> | Os047140_01 | S6 | 0.000  | -0.900 | P | 6857.839  | P | 4478.340 | P | 8357.384  | -                |
| DG <sub>HPU</sub> | Os047467_01 | S6 | -1.041 | 0.000  | P | 784.863   | P | 381.331  | P | 480.590   | LOC_Os08g05160.1 |
| DG <sub>HPU</sub> | Os047473_01 | S6 | 1.939  | 10.000 | P | 151.048   | P | 579.159  | A | 105.994   | LOC_Os02g53570.1 |
| DG <sub>HPU</sub> | Os047654_01 | S6 | 0.000  | 1.038  | P | 1415.290  | P | 1398.462 | P | 681.040   | -                |
| DG <sub>HPU</sub> | Os048525_01 | S6 | -1.409 | -1.180 | P | 3733.193  | P | 1406.007 | P | 3185.865  | LOC_Os07g14750.1 |
| DG <sub>HPU</sub> | Os048609_01 | S6 | -0.914 | 0.000  | P | 391.417   | P | 207.761  | P | 318.109   | LOC_Os10g34902.1 |
| DG <sub>HPU</sub> | Os048713_01 | S6 | -1.224 | -1.045 | P | 566.258   | P | 242.414  | P | 500.092   | LOC_Os11g27090.1 |
| DG <sub>HPU</sub> | Os049133_01 | S6 | 10.000 | 0.993  | A | 119.943   | P | 210.883  | P | 105.961   | LOC_Os05g31370.1 |
| DG <sub>HPU</sub> | Os049499_01 | S6 | -0.914 | 0.000  | P | 457.912   | P | 243.012  | P | 222.657   | LOC_Os05g27000.1 |
| DG <sub>HPU</sub> | Os049938_01 | S6 | 0.000  | -0.814 | P | 192.137   | P | 128.676  | P | 226.210   | LOC_Os03g07660.1 |
| DG <sub>HPU</sub> | Os050517_01 | S6 | -1.357 | 10.000 | P | 566.321   | P | 221.032  | A | 80.887    | LOC_Os12g26490.1 |
| DG <sub>HPU</sub> | Os050787_01 | S6 | -0.936 | 0.000  | P | 1831.800  | P | 957.674  | P | 1492.014  | LOC_Os03g28980.1 |
| DG <sub>HPU</sub> | Os050925_01 | S6 | 10.000 | -0.915 | A | 179.642   | P | 188.678  | P | 355.657   | LOC_Os01g61840.1 |
| DG <sub>HPU</sub> | Os051641_01 | S6 | 0.925  | 0.000  | P | 143.939   | P | 273.363  | P | 198.862   | LOC_Os01g35780.1 |
| DG <sub>HPU</sub> | Os051940_01 | S6 | 0.000  | -0.850 | P | 753.829   | P | 559.379  | P | 1008.399  | LOC_Os10g39410.1 |
| DG <sub>HPU</sub> | Os051951_01 | S6 | -1.070 | -1.039 | P | 6708.296  | P | 3196.088 | P | 6565.445  | LOC_Os07g05480.1 |
| DG <sub>HPU</sub> | Os051973_01 | S6 | -1.380 | -1.102 | P | 5343.895  | P | 2052.958 | P | 4406.889  | LOC_Os01g45274.1 |
| DG <sub>HPU</sub> | Os051981_01 | S6 | 1.311  | 0.000  | P | 1389.599  | P | 3446.689 | P | 2447.946  | LOC_Os11g47809.1 |
| DG <sub>HPU</sub> | Os051998_01 | S6 | -1.358 | -1.102 | P | 5153.729  | P | 2010.121 | P | 4315.887  | LOC_Os12g08770.1 |
| DG <sub>HPU</sub> | Os052012_01 | S6 | 0.000  | 0.920  | P | 310.252   | P | 505.933  | P | 267.390   | LOC_Os03g10340.1 |
| DG <sub>HPU</sub> | Os052015_01 | S6 | -1.037 | 0.000  | P | 2207.572  | P | 1075.473 | P | 1057.945  | LOC_Os03g07300.1 |

|                   |             |    |        |        |   |           |   |          |   |           |                  |
|-------------------|-------------|----|--------|--------|---|-----------|---|----------|---|-----------|------------------|
| DG <sub>HPU</sub> | Os052018_01 | S6 | -1.299 | 0.000  | P | 20517.911 | P | 8340.298 | P | 9894.934  | -                |
| DG <sub>HPU</sub> | Os052028_01 | S6 | -1.059 | -1.222 | P | 2501.265  | P | 1200.686 | P | 2800.915  | LOC_Os12g23200.1 |
| DG <sub>HPU</sub> | Os052052_01 | S6 | -0.919 | -1.164 | P | 916.178   | P | 484.538  | P | 1086.039  | LOC_Os10g37180.1 |
| DG <sub>HPU</sub> | Os052055_01 | S6 | 1.234  | 0.000  | P | 171.199   | P | 402.563  | P | 357.253   | LOC_Os08g41300.1 |
| DG <sub>HPU</sub> | Os052085_01 | S6 | -1.886 | -0.870 | P | 3538.549  | P | 957.189  | P | 1749.552  | LOC_Os07g25430.3 |
| DG <sub>HPU</sub> | Os052207_01 | S6 | -0.986 | 0.000  | P | 1098.089  | P | 554.580  | P | 850.984   | LOC_Os01g47330.1 |
| DG <sub>HPU</sub> | Os052214_01 | S6 | 1.980  | 2.123  | P | 424.900   | P | 1676.435 | P | 384.937   | -                |
| DG <sub>HPU</sub> | Os052232_01 | S6 | 0.000  | -0.850 | P | 302.157   | P | 240.774  | P | 434.124   | LOC_Os02g30630.2 |
| DG <sub>HPU</sub> | Os052281_01 | S6 | -1.023 | 0.000  | P | 2641.230  | P | 1299.723 | P | 1539.471  | LOC_Os07g46460.1 |
| DG <sub>HPU</sub> | Os052307_01 | S6 | -1.808 | -0.929 | P | 1557.208  | P | 444.667  | P | 846.729   | LOC_Os03g31750.1 |
| DG <sub>HPU</sub> | Os052396_01 | S6 | 0.000  | -0.837 | P | 236.459   | P | 274.714  | P | 490.877   | LOC_Os05g01290.1 |
| DG <sub>HPU</sub> | Os052404_01 | S6 | 0.000  | -0.876 | P | 1634.369  | P | 1028.657 | P | 1887.523  | LOC_Os06g47220.1 |
| DG <sub>HPU</sub> | Os052558_01 | S6 | 0.000  | -0.894 | P | 340.528   | P | 281.695  | P | 523.654   | -                |
| DG <sub>HPU</sub> | Os052819_01 | S6 | 0.996  | 0.000  | P | 307.653   | P | 613.662  | P | 470.698   | -                |
| DG <sub>HPU</sub> | Os052943_01 | S6 | 1.281  | 0.000  | P | 233.109   | P | 566.638  | P | 403.212   | LOC_Os01g45570.1 |
| DG <sub>HPU</sub> | Os053523_01 | S6 | 0.000  | 1.562  | P | 422.032   | P | 671.970  | P | 227.661   | LOC_Os02g45520.2 |
| DG <sub>HPU</sub> | Os054035_01 | S6 | 0.000  | 0.989  | P | 499.261   | P | 726.690  | P | 366.077   | -                |
| DG <sub>HPU</sub> | Os054419_01 | S6 | -1.136 | -1.229 | P | 6807.363  | P | 3097.796 | P | 7259.141  | LOC_Os01g31690.1 |
| DG <sub>HPU</sub> | Os054429_01 | S6 | -1.452 | 10.000 | P | 379.049   | P | 138.558  | A | 118.542   | LOC_Os12g38051.1 |
| DG <sub>HPU</sub> | Os054432_01 | S6 | -0.988 | 0.000  | P | 1426.528  | P | 719.008  | P | 1042.909  | LOC_Os04g58200.1 |
| DG <sub>HPU</sub> | Os054436_01 | S6 | 0.000  | -0.917 | P | 1434.492  | P | 968.592  | P | 1829.289  | LOC_Os09g39780.2 |
| DG <sub>HPU</sub> | Os054451_01 | S6 | -1.050 | 0.000  | P | 388.768   | P | 187.786  | P | 282.428   | LOC_Os03g08360.1 |
| DG <sub>HPU</sub> | Os054452_01 | S6 | -1.479 | -1.102 | P | 5091.410  | P | 1826.409 | P | 3919.601  | LOC_Os07g04840.1 |
| DG <sub>HPU</sub> | Os054455_01 | S6 | 1.166  | 0.000  | P | 175.404   | P | 393.641  | P | 345.805   | LOC_Os08g03640.1 |
| DG <sub>HPU</sub> | Os054459_01 | S6 | -0.942 | 0.000  | P | 14546.240 | P | 7570.948 | P | 10119.666 | LOC_Os08g10020.2 |
| DG <sub>HPU</sub> | Os054468_01 | S6 | -1.267 | 0.000  | P | 17623.896 | P | 7325.414 | P | 12258.683 | LOC_Os04g38600.1 |
| DG <sub>HPU</sub> | Os054472_01 | S6 | -1.102 | 0.000  | P | 6210.730  | P | 2893.708 | P | 3798.487  | -                |
| DG <sub>HPU</sub> | Os054487_01 | S6 | -1.140 | -1.508 | P | 1136.509  | P | 515.823  | P | 1466.817  | LOC_Os06g04020.1 |
| DG <sub>HPU</sub> | Os054533_01 | S6 | -1.130 | -0.852 | P | 5049.163  | P | 2306.270 | P | 4162.142  | LOC_Os03g56670.2 |
| DG <sub>HPU</sub> | Os054538_01 | S6 | -1.681 | -1.193 | P | 1113.146  | P | 347.145  | P | 793.882   | LOC_Os05g33570.1 |
| DG <sub>HPU</sub> | Os054539_01 | S6 | -1.040 | 0.000  | P | 10505.091 | P | 5110.034 | P | 8608.697  | LOC_Os09g30340.1 |

|                   |               |    |                  |          |   |                  |   |              |         |              |                  |
|-------------------|---------------|----|------------------|----------|---|------------------|---|--------------|---------|--------------|------------------|
| DG <sub>HPU</sub> | Os054583_01   | S6 | -1.286           | 0.000    | P | 2873.431         | P | 1178.233     | P       | 1581.810     | LOC_Os06g04270.1 |
| DG <sub>HPU</sub> | Os054590_01   | S6 | 2.087            | 1.132    | P | 260.777          | P | 1108.060     | P       | 505.436      | LOC_Os03g09250.2 |
| DG <sub>HPU</sub> | Os054626_01   | S6 | 1.109            | 0.000    | P | 179.970          | P | 388.161      | P       | 312.012      | LOC_Os03g22810.1 |
| DG <sub>HPU</sub> | Os054653_01   | S6 | -0.928           | 0.000    | P | 1127.851         | P | 592.839      | P       | 717.257      | LOC_Os01g46070.1 |
| DG <sub>HPU</sub> | Os054659_01   | S6 | 0.000            | 1.009    | P | 653.737          | P | 730.904      | P       | 363.077      | LOC_Os01g07760.2 |
| DG <sub>HPU</sub> | Os054724_01   | S6 | 0.000            | 0.903    | P | 338.068          | P | 336.782      | P       | 180.148      | LOC_Os09g35730.1 |
| DG <sub>HPU</sub> | Os054745_01   | S6 | -0.966           | 0.000    | P | 18288.091        | P | 9362.659     | P       | 9461.447     | LOC_Os07g37030.1 |
| DG <sub>HPU</sub> | Os054747_01   | S6 | 0.000            | 0.993    | P | 289.458          | P | 279.754      | P       | 140.558      | LOC_Os05g06270.1 |
| DG <sub>HPU</sub> | Os054810_01   | S6 | 0.000            | -0.794   | P | 621.853          | P | 505.928      | P       | 877.405      | LOC_Os01g69950.1 |
| DG <sub>HPU</sub> | Os054912_01   | S6 | -0.998           | 0.000    | P | 1360.730         | P | 681.376      | P       | 641.062      | LOC_Os02g44108.1 |
| DG <sub>HPU</sub> | Os054951_01   | S6 | 0.000            | 1.005    | P | 768.888          | P | 1281.258     | P       | 638.361      | LOC_Os01g50700.1 |
| DG <sub>HPU</sub> | Os054983_01   | S6 | 0.000            | 0.855    | P | 249.682          | P | 289.676      | P       | 160.148      | LOC_Os05g33310.1 |
| DG <sub>HPU</sub> | Os055042_01   | S6 | 0.000            | 0.834    | P | 754.626          | P | 690.543      | P       | 387.372      | LOC_Os09g06464.1 |
| DG <sub>HPU</sub> | Os055048_01   | S6 | 0.000            | 0.857    | P | 311.487          | P | 273.294      | P       | 150.927      | LOC_Os10g42830.1 |
| DG <sub>HPU</sub> | Os055221_01   | S6 | 0.000            | -0.986   | P | 860.985          | P | 524.286      | P       | 1038.282     | LOC_Os12g43380.1 |
| DG <sub>HPU</sub> | Os055225_01   | S6 | 10.000           | -0.939   | A | 71.370           | P | 132.614      | P       | 254.165      | LOC_Os10g40360.1 |
| DG <sub>HPU</sub> | Os055265_01   | S6 | 0.000            | 0.898    | P | 460.777          | P | 420.521      | P       | 225.651      | -                |
| DG <sub>HPU</sub> | Os055567_01   | S6 | 0.000            | -0.772   | P | 1193.717         | P | 1154.548     | P       | 1971.897     | LOC_Os07g46330.1 |
| DG <sub>HPU</sub> | Os055739_02   | S6 | 0.000            | 0.848    | P | 567.088          | P | 734.115      | P       | 407.768      | -                |
| DG <sub>HPU</sub> | Os056222_01   | S6 | -1.424           | 0.000    | P | 1381.699         | P | 514.958      | P       | 746.541      | LOC_Os06g01580.1 |
| DG <sub>HPU</sub> | Os056494_02   | S6 | 0.000            | -0.769   | P | 222.048          | P | 253.612      | P       | 432.209      | -                |
| DG <sub>HPU</sub> | Os056792_01   | S6 | -1.061           | 0.000    | P | 876.065          | P | 419.974      | P       | 443.778      | LOC_Os06g08014.1 |
| DG <sub>HPU</sub> | Os056910_02   | S6 | -1.049           | -1.620   | P | 9118.451         | P | 4405.926     | P       | 13542.881    | LOC_Os08g33820.1 |
| DG <sub>HPU</sub> | Os056919_02   | S6 | 0.000            | 1.276    | P | 273.819          | P | 479.609      | P       | 198.112      | -                |
| DG <sub>HPU</sub> | Os056920_02   | S6 | -1.976           | -0.956   | P | 1657.207         | P | 421.243      | P       | 817.382      | -                |
| DG <sub>HPU</sub> | Os056979_02   | S6 | 0.000            | 1.035    | P | 1666.189         | P | 1709.573     | P       | 834.289      | LOC_Os11g02300.1 |
| DG <sub>HPU</sub> | Os056989_02   | S6 | -1.041           | -0.773   | P | 256.800          | P | 124.792      | P       | 213.312      | -                |
| DG <sub>HPU</sub> | Os057047_02   | S6 | 0.000            | 0.834    | P | 283.015          | P | 239.874      | P       | 134.594      | LOC_Os04g40080.1 |
| DG <sub>HPU</sub> | Os057254_02   | S6 | -1.678           | -1.914   | P | 14697.286        | P | 4592.859     | P       | 17311.272    | -                |
| DG <sub>HPU</sub> | GeneID        | S5 | log2(Ratio(L/9)) |          |   | log2(Ratio(L/P)) |   | Fw_9311.flag | Fw_9311 | Fw_LYP9.flag | Fw_LYP9          |
|                   | Fw_PA64s.flag |    | Fw_PA64s         | TIGR5.id |   |                  |   |              |         |              |                  |

|                   |             |    |        |        |   |          |   |           |   |          |                  |
|-------------------|-------------|----|--------|--------|---|----------|---|-----------|---|----------|------------------|
| DG <sub>HPU</sub> | Os000041_01 | S5 | 0.000  | 1.209  | P | 1285.938 | P | 1569.857  | P | 679.054  | LOC_Os10g38700.1 |
| DG <sub>HPU</sub> | Os000043_01 | S5 | 1.584  | 1.538  | P | 597.207  | P | 1790.670  | P | 616.605  | LOC_Os10g39150.1 |
| DG <sub>HPU</sub> | Os000169_01 | S5 | 0.000  | 1.667  | P | 576.017  | P | 1144.528  | P | 360.512  | LOC_Os05g40010.1 |
| DG <sub>HPU</sub> | Os000208_01 | S5 | 0.000  | -1.267 | P | 1363.493 | P | 1043.165  | P | 2509.912 | LOC_Os02g09150.1 |
| DG <sub>HPU</sub> | Os000367_01 | S5 | 1.356  | 0.000  | P | 3444.484 | P | 8814.896  | P | 9859.347 | LOC_Os06g01850.1 |
| DG <sub>HPU</sub> | Os000380_01 | S5 | -1.155 | 0.000  | P | 853.424  | P | 383.135   | P | 456.661  | LOC_Os05g47540.1 |
| DG <sub>HPU</sub> | Os000418_01 | S5 | 0.000  | 1.753  | P | 644.934  | P | 1368.031  | P | 405.772  | LOC_Os02g47600.2 |
| DG <sub>HPU</sub> | Os000429_01 | S5 | 0.000  | 1.376  | P | 300.581  | P | 665.128   | P | 256.285  | LOC_Os01g68770.1 |
| DG <sub>HPU</sub> | Os000597_01 | S5 | 0.000  | 1.617  | P | 299.615  | P | 597.332   | P | 194.700  | LOC_Os01g72460.1 |
| DG <sub>HPU</sub> | Os000629_01 | S5 | 1.268  | 0.000  | P | 385.417  | P | 928.351   | P | 1064.635 | LOC_Os08g31750.1 |
| DG <sub>HPU</sub> | Os000826_01 | S5 | 0.000  | -1.746 | P | 533.476  | P | 360.471   | P | 1208.928 | LOC_Os01g68830.1 |
| DG <sub>HPU</sub> | Os000827_01 | S5 | 0.000  | -1.187 | P | 332.551  | P | 302.381   | P | 688.262  | LOC_Os03g31730.1 |
| DG <sub>HPU</sub> | Os000842_01 | S5 | -1.958 | -2.568 | P | 5794.237 | P | 1491.595  | P | 8847.071 | LOC_Os12g33130.1 |
| DG <sub>HPU</sub> | Os000963_01 | S5 | 1.222  | 0.000  | P | 234.617  | P | 547.260   | P | 411.704  | LOC_Os03g17050.1 |
| DG <sub>HPU</sub> | Os001355_01 | S5 | 0.000  | -1.479 | P | 4228.247 | P | 2199.048  | P | 6128.735 | LOC_Os07g48460.1 |
| DG <sub>HPU</sub> | Os001377_01 | S5 | 0.000  | 1.680  | P | 1597.113 | P | 3349.243  | P | 1045.106 | LOC_Os02g06710.1 |
| DG <sub>HPU</sub> | Os001529_01 | S5 | 1.340  | 0.000  | P | 5663.192 | P | 14332.889 | P | 8202.230 | LOC_Os01g60830.1 |
| DG <sub>HPU</sub> | Os001579_01 | S5 | 1.199  | 0.000  | P | 2008.563 | P | 4611.053  | P | 2774.732 | LOC_Os10g36170.1 |
| DG <sub>HPU</sub> | Os001621_01 | S5 | 1.218  | 0.000  | P | 395.008  | P | 919.181   | P | 905.786  | LOC_Os05g47670.1 |
| DG <sub>HPU</sub> | Os001637_01 | S5 | 0.000  | -1.115 | P | 445.724  | P | 288.083   | P | 623.855  | LOC_Os09g23110.1 |
| DG <sub>HPU</sub> | Os001790_01 | S5 | 0.000  | -1.076 | P | 1055.485 | P | 679.447   | P | 1432.457 | LOC_Os09g28510.1 |
| DG <sub>HPU</sub> | Os001830_01 | S5 | 1.248  | 0.000  | P | 352.152  | P | 836.590   | P | 677.020  | LOC_Os03g15590.1 |
| DG <sub>HPU</sub> | Os001838_01 | S5 | 0.000  | -1.263 | P | 653.622  | P | 435.138   | P | 1044.204 | LOC_Os03g04440.1 |
| DG <sub>HPU</sub> | Os001842_01 | S5 | 0.000  | 1.692  | P | 431.780  | P | 865.456   | P | 267.802  | -                |
| DG <sub>HPU</sub> | Os001884_01 | S5 | 1.369  | 2.198  | P | 311.639  | P | 804.886   | P | 175.368  | LOC_Os03g60580.1 |
| DG <sub>HPU</sub> | Os001903_01 | S5 | -1.307 | 10.000 | P | 504.498  | P | 203.899   | A | 89.075   | LOC_Os01g68290.1 |
| DG <sub>HPU</sub> | Os001934_01 | S5 | 10.000 | -1.532 | A | 125.735  | P | 463.474   | P | 1340.442 | -                |
| DG <sub>HPU</sub> | Os001981_01 | S5 | 0.000  | 1.208  | P | 712.455  | P | 614.265   | P | 265.920  | LOC_Os02g45920.1 |
| DG <sub>HPU</sub> | Os002395_01 | S5 | 0.000  | -1.225 | P | 548.742  | P | 387.170   | P | 905.339  | -                |
| DG <sub>HPU</sub> | Os002417_01 | S5 | 1.931  | 0.000  | P | 188.532  | P | 718.971   | P | 517.871  | LOC_Os06g10780.1 |
| DG <sub>HPU</sub> | Os002451_01 | S5 | 1.371  | 0.000  | P | 164.314  | P | 424.904   | P | 336.168  | LOC_Os01g47730.1 |

|                   |             |    |        |        |   |          |   |          |   |          |                  |
|-------------------|-------------|----|--------|--------|---|----------|---|----------|---|----------|------------------|
| DG <sub>HPU</sub> | Os002553_01 | S5 | 0.000  | -1.220 | P | 271.712  | P | 235.694  | P | 549.053  | LOC_Os06g45580.1 |
| DG <sub>HPU</sub> | Os003908_01 | S5 | 1.611  | 10.000 | P | 193.245  | P | 590.365  | A | 618.815  | LOC_Os06g36590.1 |
| DG <sub>HPU</sub> | Os003989_01 | S5 | 1.440  | 2.107  | P | 2726.397 | P | 7399.790 | P | 1717.802 | LOC_Os07g32570.1 |
| DG <sub>HPU</sub> | Os004097_01 | S5 | 0.000  | -1.165 | P | 261.677  | P | 183.385  | P | 411.072  | LOC_Os12g12934.1 |
| DG <sub>HPU</sub> | Os004223_01 | S5 | -1.084 | 0.000  | P | 482.561  | P | 227.619  | P | 268.651  | LOC_Os08g33200.1 |
| DG <sub>HPU</sub> | Os004287_01 | S5 | 0.000  | 1.262  | P | 508.519  | P | 478.791  | P | 199.586  | LOC_Os03g28140.1 |
| DG <sub>HPU</sub> | Os004399_01 | S5 | -1.201 | 10.000 | P | 1230.260 | P | 535.150  | A | 88.616   | LOC_Os02g40180.1 |
| DG <sub>HPU</sub> | Os005159_01 | S5 | 0.000  | 2.072  | P | 260.887  | P | 580.882  | P | 138.154  | -                |
| DG <sub>HPU</sub> | Os005642_01 | S5 | 0.000  | 1.387  | P | 302.417  | P | 366.143  | P | 140.043  | -                |
| DG <sub>HPU</sub> | Os006070_01 | S5 | 0.000  | 1.266  | P | 2084.815 | P | 2716.678 | P | 1129.637 | LOC_Os01g40094.1 |
| DG <sub>HPU</sub> | Os006546_02 | S5 | 0.000  | 1.218  | P | 475.954  | P | 827.904  | P | 355.784  | -                |
| DG <sub>HPU</sub> | Os006733_01 | S5 | -1.258 | 0.000  | P | 697.403  | P | 291.700  | P | 318.008  | LOC_Os03g63330.1 |
| DG <sub>HPU</sub> | Os007196_01 | S5 | 0.000  | 1.751  | P | 325.091  | P | 538.728  | P | 160.048  | LOC_Os05g38290.1 |
| DG <sub>HPU</sub> | Os007263_01 | S5 | -1.662 | -1.847 | P | 7393.602 | P | 2336.425 | P | 8404.349 | LOC_Os12g33150.1 |
| DG <sub>HPU</sub> | Os008101_01 | S5 | 0.000  | -1.459 | P | 509.114  | P | 522.737  | P | 1437.192 | LOC_Os01g48380.1 |
| DG <sub>HPU</sub> | Os008213_01 | S5 | 0.000  | -1.246 | P | 222.015  | P | 171.287  | P | 406.302  | LOC_Os05g05040.1 |
| DG <sub>HPU</sub> | Os008355_02 | S5 | 0.000  | -1.318 | P | 241.081  | P | 142.243  | P | 354.579  | -                |
| DG <sub>HPU</sub> | Os008439_01 | S5 | -1.477 | 10.000 | P | 921.770  | P | 331.096  | A | 453.487  | LOC_Os07g44740.1 |
| DG <sub>HPU</sub> | Os008548_01 | S5 | 0.000  | 1.373  | P | 336.902  | P | 575.287  | P | 222.167  | LOC_Os03g02190.1 |
| DG <sub>HPU</sub> | Os008612_01 | S5 | 0.000  | -1.452 | P | 187.113  | P | 145.868  | P | 398.974  | LOC_Os03g61030.2 |
| DG <sub>HPU</sub> | Os008618_01 | S5 | 1.826  | 0.000  | P | 474.699  | P | 1683.585 | P | 1087.735 | LOC_Os04g54640.1 |
| DG <sub>HPU</sub> | Os008635_01 | S5 | 1.449  | 0.000  | P | 901.129  | P | 2460.307 | P | 1765.315 | LOC_Os02g55140.1 |
| DG <sub>HPU</sub> | Os008682_01 | S5 | 0.000  | -1.199 | P | 234.351  | P | 191.427  | P | 439.431  | LOC_Os07g11280.2 |
| DG <sub>HPU</sub> | Os008707_01 | S5 | 0.000  | -1.275 | P | 189.860  | P | 163.824  | P | 396.538  | LOC_Os03g13730.1 |
| DG <sub>HPU</sub> | Os008754_01 | S5 | 0.000  | -1.548 | P | 1327.972 | P | 1139.789 | P | 3332.497 | LOC_Os06g02490.1 |
| DG <sub>HPU</sub> | Os008761_01 | S5 | 2.892  | 2.528  | P | 265.895  | P | 1974.034 | P | 342.205  | LOC_Os02g32580.1 |
| DG <sub>HPU</sub> | Os008785_01 | S5 | 1.282  | 0.000  | P | 379.355  | P | 922.740  | P | 982.981  | LOC_Os04g35300.1 |
| DG <sub>HPU</sub> | Os008826_01 | S5 | 0.000  | -1.167 | P | 316.451  | P | 207.801  | P | 466.711  | LOC_Os01g69060.2 |
| DG <sub>HPU</sub> | Os008878_01 | S5 | -1.329 | -2.410 | P | 809.887  | P | 322.282  | P | 1712.884 | LOC_Os08g06280.2 |
| DG <sub>HPU</sub> | Os008888_01 | S5 | 0.000  | -1.355 | P | 239.571  | P | 151.708  | P | 388.170  | LOC_Os03g43420.1 |
| DG <sub>HPU</sub> | Os008896_01 | S5 | 0.000  | -1.156 | P | 199.509  | P | 200.216  | P | 446.299  | LOC_Os04g51520.1 |

|                   |             |    |        |        |   |           |   |           |   |           |                  |
|-------------------|-------------|----|--------|--------|---|-----------|---|-----------|---|-----------|------------------|
| DG <sub>HPU</sub> | Os008962_01 | S5 | 1.372  | 10.000 | P | 192.443   | P | 497.962   | A | 660.117   | -                |
| DG <sub>HPU</sub> | Os009004_01 | S5 | 0.000  | 1.262  | P | 336.815   | P | 450.886   | P | 187.956   | LOC_Os06g48620.1 |
| DG <sub>HPU</sub> | Os009024_01 | S5 | 0.000  | -1.536 | P | 618.171   | P | 320.805   | P | 930.541   | LOC_Os07g08710.2 |
| DG <sub>HPU</sub> | Os009089_01 | S5 | 1.604  | 0.000  | P | 137.595   | P | 418.396   | P | 236.325   | LOC_Os04g38940.1 |
| DG <sub>HPU</sub> | Os009115_01 | S5 | 0.000  | 1.209  | P | 436.040   | P | 395.323   | P | 170.947   | LOC_Os04g39440.2 |
| DG <sub>HPU</sub> | Os009192_01 | S5 | 0.000  | 1.485  | P | 475.996   | P | 600.807   | P | 214.706   | LOC_Os01g50460.1 |
| DG <sub>HPU</sub> | Os009222_01 | S5 | 0.000  | 1.475  | P | 667.039   | P | 1119.869  | P | 402.792   | LOC_Os02g56900.1 |
| DG <sub>HPU</sub> | Os009518_01 | S5 | -1.178 | -2.650 | P | 4334.543  | P | 1915.497  | P | 12024.392 | LOC_Os01g73250.1 |
| DG <sub>HPU</sub> | Os009556_01 | S5 | 0.000  | 1.904  | P | 4130.344  | P | 7187.572  | P | 1920.168  | LOC_Os03g59320.1 |
| DG <sub>HPU</sub> | Os009578_01 | S5 | 0.000  | 1.207  | P | 670.147   | P | 1201.550  | P | 520.586   | LOC_Os12g44370.1 |
| DG <sub>HPU</sub> | Os009604_01 | S5 | 0.000  | -1.449 | P | 1257.914  | P | 670.796   | P | 1831.144  | LOC_Os07g43810.1 |
| DG <sub>HPU</sub> | Os009664_01 | S5 | 0.000  | 1.214  | P | 596.932   | P | 923.191   | P | 398.018   | LOC_Os03g04470.1 |
| DG <sub>HPU</sub> | Os009673_01 | S5 | 1.424  | 10.000 | P | 297.557   | P | 798.690   | A | 1184.187  | LOC_Os11g27370.1 |
| DG <sub>HPU</sub> | Os009705_01 | S5 | 0.000  | 2.151  | P | 522.010   | P | 899.189   | P | 202.432   | LOC_Os03g05280.1 |
| DG <sub>HPU</sub> | Os009883_01 | S5 | 0.000  | -1.323 | P | 5848.265  | P | 3905.959  | P | 9772.773  | LOC_Os02g51080.1 |
| DG <sub>HPU</sub> | Os010002_01 | S5 | 0.000  | 1.770  | P | 33170.693 | P | 51076.351 | P | 14971.466 | LOC_Os01g54210.1 |
| DG <sub>HPU</sub> | Os010034_01 | S5 | 0.000  | 1.236  | P | 949.854   | P | 841.175   | P | 357.171   | LOC_Os01g68940.1 |
| DG <sub>HPU</sub> | Os010111_01 | S5 | 1.736  | 0.000  | P | 215.242   | P | 716.863   | P | 312.610   | LOC_Os05g47530.1 |
| DG <sub>HPU</sub> | Os010235_01 | S5 | 1.272  | 1.459  | P | 686.729   | P | 1657.959  | P | 602.958   | LOC_Os06g10130.1 |
| DG <sub>HPU</sub> | Os010356_01 | S5 | 1.827  | 2.243  | P | 1394.251  | P | 4947.839  | P | 1045.373  | -                |
| DG <sub>HPU</sub> | Os010484_01 | S5 | 0.000  | -1.349 | P | 2079.193  | P | 1090.979  | P | 2779.372  | -                |
| DG <sub>HPU</sub> | Os010488_01 | S5 | 0.000  | 1.354  | P | 4033.402  | P | 6944.735  | P | 2716.892  | -                |
| DG <sub>HPU</sub> | Os010490_01 | S5 | -1.401 | -2.431 | P | 1509.459  | P | 571.625   | P | 3082.726  | LOC_Os03g49480.1 |
| DG <sub>HPU</sub> | Os010510_01 | S5 | 0.000  | -1.237 | P | 274.417   | P | 203.956   | P | 480.897   | -                |
| DG <sub>HPU</sub> | Os010804_01 | S5 | 0.000  | 1.973  | P | 621.196   | P | 1199.204  | P | 305.425   | LOC_Os02g54140.1 |
| DG <sub>HPU</sub> | Os010863_01 | S5 | 1.670  | 1.501  | P | 205.775   | P | 654.833   | P | 231.375   | LOC_Os02g43330.1 |
| DG <sub>HPU</sub> | Os010924_01 | S5 | 0.000  | 1.534  | P | 584.187   | P | 1273.820  | P | 439.993   | LOC_Os09g39940.1 |
| DG <sub>HPU</sub> | Os010927_01 | S5 | 2.245  | 10.000 | P | 245.671   | P | 1164.583  | A | 142.503   | -                |
| DG <sub>HPU</sub> | Os010942_01 | S5 | 0.000  | 1.497  | P | 646.200   | P | 891.005   | P | 315.644   | LOC_Os06g44180.1 |
| DG <sub>HPU</sub> | Os010948_01 | S5 | -2.262 | -1.689 | P | 1380.792  | P | 287.852   | P | 928.334   | LOC_Os03g03724.2 |
| DG <sub>HPU</sub> | Os011007_01 | S5 | -1.308 | 0.000  | P | 610.572   | P | 246.649   | P | 465.185   | LOC_Os08g43190.2 |

|                   |             |    |        |        |   |          |   |          |   |          |                  |
|-------------------|-------------|----|--------|--------|---|----------|---|----------|---|----------|------------------|
| DG <sub>HPU</sub> | Os011281_01 | S5 | 1.264  | 0.000  | P | 126.021  | P | 302.678  | P | 319.726  | LOC_Os06g43790.1 |
| DG <sub>HPU</sub> | Os011457_01 | S5 | 0.000  | -1.648 | P | 189.783  | P | 135.145  | P | 423.655  | LOC_Os05g47880.1 |
| DG <sub>HPU</sub> | Os011563_01 | S5 | 10.000 | 1.368  | A | 105.750  | P | 461.461  | P | 178.825  | LOC_Os03g13810.1 |
| DG <sub>HPU</sub> | Os011578_01 | S5 | 1.692  | 0.000  | P | 2388.955 | P | 7717.319 | P | 6208.875 | LOC_Os03g38730.1 |
| DG <sub>HPU</sub> | Os011601_01 | S5 | 0.000  | -1.223 | P | 145.092  | P | 163.696  | P | 381.995  | LOC_Os08g41990.1 |
| DG <sub>HPU</sub> | Os011617_01 | S5 | 0.000  | -1.373 | P | 463.515  | P | 489.670  | P | 1268.450 | LOC_Os07g04990.2 |
| DG <sub>HPU</sub> | Os011642_01 | S5 | 1.483  | 0.000  | P | 327.510  | P | 915.598  | P | 667.187  | LOC_Os10g11140.1 |
| DG <sub>HPU</sub> | Os011643_01 | S5 | 1.545  | 0.000  | P | 128.869  | P | 375.956  | P | 213.676  | LOC_Os06g14420.1 |
| DG <sub>HPU</sub> | Os011647_01 | S5 | 1.690  | 0.000  | P | 300.805  | P | 970.299  | P | 472.159  | LOC_Os02g51020.1 |
| DG <sub>HPU</sub> | Os011662_01 | S5 | 0.000  | -1.782 | P | 2151.089 | P | 1660.779 | P | 5710.502 | LOC_Os07g34570.2 |
| DG <sub>HPU</sub> | Os011734_01 | S5 | 1.257  | 0.000  | P | 238.804  | P | 570.647  | P | 305.867  | LOC_Os08g35620.1 |
| DG <sub>HPU</sub> | Os011767_01 | S5 | 0.000  | -1.479 | P | 573.110  | P | 427.729  | P | 1192.606 | LOC_Os06g09679.2 |
| DG <sub>HPU</sub> | Os011776_01 | S5 | 1.316  | 0.000  | P | 172.970  | P | 430.505  | P | 482.945  | LOC_Os06g09330.1 |
| DG <sub>HPU</sub> | Os011780_01 | S5 | 1.449  | 0.000  | P | 135.431  | P | 369.711  | P | 296.447  | LOC_Os01g66300.1 |
| DG <sub>HPU</sub> | Os011824_01 | S5 | 10.000 | -1.648 | A | 127.966  | P | 220.144  | P | 689.916  | LOC_Os09g27420.1 |
| DG <sub>HPU</sub> | Os011859_01 | S5 | 1.455  | 0.000  | P | 221.460  | P | 607.069  | P | 555.079  | LOC_Os11g08670.1 |
| DG <sub>HPU</sub> | Os011930_01 | S5 | 1.432  | 0.000  | P | 213.811  | P | 576.833  | P | 450.050  | LOC_Os08g38460.1 |
| DG <sub>HPU</sub> | Os011942_01 | S5 | 1.184  | 0.000  | P | 504.249  | P | 1145.744 | P | 913.011  | LOC_Os02g57620.1 |
| DG <sub>HPU</sub> | Os011961_01 | S5 | 1.324  | 10.000 | P | 105.796  | P | 264.888  | A | 101.097  | LOC_Os01g51290.2 |
| DG <sub>HPU</sub> | Os011973_01 | S5 | 0.000  | -1.213 | P | 224.026  | P | 239.103  | P | 554.283  | LOC_Os09g25760.1 |
| DG <sub>HPU</sub> | Os012032_01 | S5 | 0.000  | -1.291 | P | 284.847  | P | 220.563  | P | 539.789  | LOC_Os06g39370.1 |
| DG <sub>HPU</sub> | Os012058_01 | S5 | 1.461  | 0.000  | P | 105.455  | P | 290.356  | P | 220.445  | LOC_Os01g25990.1 |
| DG <sub>HPU</sub> | Os012159_01 | S5 | 10.000 | -1.187 | A | 101.487  | P | 194.905  | P | 443.813  | LOC_Os12g01140.1 |
| DG <sub>HPU</sub> | Os012349_01 | S5 | 0.000  | -1.164 | P | 572.270  | P | 455.642  | P | 1021.300 | LOC_Os03g61220.1 |
| DG <sub>HPU</sub> | Os012355_01 | S5 | -1.324 | 0.000  | P | 968.240  | P | 386.729  | P | 659.668  | LOC_Os06g10650.1 |
| DG <sub>HPU</sub> | Os012487_01 | S5 | 0.000  | -1.438 | P | 3799.975 | P | 2065.971 | P | 5597.069 | LOC_Os07g29410.1 |
| DG <sub>HPU</sub> | Os012505_01 | S5 | 1.518  | 1.417  | P | 179.189  | P | 513.230  | P | 192.220  | LOC_Os04g48390.1 |
| DG <sub>HPU</sub> | Os012543_01 | S5 | 1.519  | 0.000  | P | 253.671  | P | 726.839  | P | 550.687  | LOC_Os05g07632.1 |
| DG <sub>HPU</sub> | Os012603_01 | S5 | 1.199  | 1.343  | P | 1776.706 | P | 4079.517 | P | 1607.999 | LOC_Os08g45190.1 |
| DG <sub>HPU</sub> | Os012754_01 | S5 | 10.000 | -1.092 | A | 124.827  | P | 304.050  | P | 648.139  | LOC_Os03g45400.1 |
| DG <sub>HPU</sub> | Os012774_01 | S5 | 0.000  | -1.242 | P | 212.314  | P | 171.648  | P | 405.962  | LOC_Os04g20164.2 |



|                   |             |    |        |        |   |          |   |          |   |          |                  |
|-------------------|-------------|----|--------|--------|---|----------|---|----------|---|----------|------------------|
| DG <sub>HPU</sub> | Os012869_01 | S5 | -1.086 | 0.000  | P | 1259.690 | P | 593.290  | P | 822.274  | LOC_Os02g08230.1 |
| DG <sub>HPU</sub> | Os012917_01 | S5 | 1.206  | 0.000  | P | 236.410  | P | 545.251  | P | 651.281  | LOC_Os01g22520.1 |
| DG <sub>HPU</sub> | Os012945_01 | S5 | 1.275  | 0.000  | P | 171.241  | P | 414.530  | P | 424.136  | LOC_Os03g60120.1 |
| DG <sub>HPU</sub> | Os012959_01 | S5 | 0.000  | -1.110 | P | 177.519  | P | 150.522  | P | 324.958  | LOC_Os02g51410.1 |
| DG <sub>HPU</sub> | Os013059_01 | S5 | 1.531  | 0.000  | P | 184.051  | P | 531.945  | P | 450.539  | LOC_Os03g06630.1 |
| DG <sub>HPU</sub> | Os013071_01 | S5 | 0.000  | 1.241  | P | 292.008  | P | 294.377  | P | 124.579  | LOC_Os10g04429.1 |
| DG <sub>HPU</sub> | Os013289_01 | S5 | 0.000  | -1.104 | P | 173.517  | P | 198.432  | P | 426.563  | LOC_Os09g17600.3 |
| DG <sub>HPU</sub> | Os013297_01 | S5 | 10.000 | -1.066 | A | 131.417  | P | 262.460  | P | 549.321  | LOC_Os01g56200.1 |
| DG <sub>HPU</sub> | Os013316_01 | S5 | 10.000 | -1.443 | A | 104.583  | P | 207.748  | P | 564.650  | LOC_Os03g20640.1 |
| DG <sub>HPU</sub> | Os013346_01 | S5 | 10.000 | 1.516  | A | 84.927   | P | 544.232  | P | 190.250  | LOC_Os04g51610.1 |
| DG <sub>HPU</sub> | Os013389_01 | S5 | 1.336  | 0.000  | P | 547.215  | P | 1381.199 | P | 1165.631 | LOC_Os09g36220.1 |
| DG <sub>HPU</sub> | Os013398_01 | S5 | 0.000  | -1.445 | P | 636.572  | P | 480.359  | P | 1307.615 | LOC_Os03g20700.2 |
| DG <sub>HPU</sub> | Os013432_01 | S5 | 2.352  | 0.000  | P | 145.954  | P | 745.364  | P | 402.921  | -                |
| DG <sub>HPU</sub> | Os013439_01 | S5 | 1.342  | 0.000  | P | 123.407  | P | 312.925  | P | 187.149  | LOC_Os02g02770.1 |
| DG <sub>HPU</sub> | Os013659_01 | S5 | 1.238  | 0.000  | P | 301.389  | P | 711.128  | P | 375.959  | LOC_Os03g60080.1 |
| DG <sub>HPU</sub> | Os013716_01 | S5 | 0.000  | -1.076 | P | 324.700  | P | 211.685  | P | 446.209  | LOC_Os05g51240.1 |
| DG <sub>HPU</sub> | Os013733_01 | S5 | 1.284  | 0.000  | P | 409.568  | P | 997.619  | P | 716.533  | LOC_Os05g04620.1 |
| DG <sub>HPU</sub> | Os013891_01 | S5 | 1.391  | 0.000  | P | 161.292  | P | 423.044  | P | 405.223  | LOC_Os12g18110.1 |
| DG <sub>HPU</sub> | Os013935_01 | S5 | 1.190  | 0.000  | P | 732.131  | P | 1670.284 | P | 1697.857 | LOC_Os03g63480.2 |
| DG <sub>HPU</sub> | Os013937_01 | S5 | 0.000  | -1.149 | P | 685.503  | P | 761.777  | P | 1689.152 | LOC_Os05g07860.1 |
| DG <sub>HPU</sub> | Os013976_01 | S5 | 0.000  | -1.073 | P | 1614.997 | P | 1671.534 | P | 3516.280 | LOC_Os10g35370.2 |
| DG <sub>HPU</sub> | Os013983_01 | S5 | 1.431  | 0.000  | P | 108.127  | P | 291.588  | P | 226.242  | LOC_Os01g47350.1 |
| DG <sub>HPU</sub> | Os014001_01 | S5 | 1.634  | 0.000  | P | 520.156  | P | 1614.786 | P | 1336.709 | -                |
| DG <sub>HPU</sub> | Os014087_01 | S5 | 0.000  | -1.110 | P | 650.340  | P | 773.282  | P | 1669.089 | -                |
| DG <sub>HPU</sub> | Os014200_01 | S5 | 0.000  | -1.298 | P | 273.233  | P | 244.504  | P | 601.099  | LOC_Os03g52680.1 |
| DG <sub>HPU</sub> | Os014203_01 | S5 | 10.000 | -1.548 | A | 113.086  | P | 166.161  | P | 485.754  | LOC_Os12g25180.1 |
| DG <sub>HPU</sub> | Os014249_01 | S5 | 10.000 | -1.925 | A | 203.324  | P | 358.352  | P | 1360.822 | LOC_Os06g28194.1 |
| DG <sub>HPU</sub> | Os014255_01 | S5 | 0.000  | -1.861 | P | 312.668  | P | 241.686  | P | 878.114  | LOC_Os03g52690.1 |
| DG <sub>HPU</sub> | Os014301_01 | S5 | 1.258  | 0.000  | P | 577.708  | P | 1382.102 | P | 781.939  | -                |
| DG <sub>HPU</sub> | Os014326_01 | S5 | 1.234  | 0.000  | P | 150.058  | P | 352.866  | P | 332.855  | LOC_Os07g13530.1 |
| DG <sub>HPU</sub> | Os014442_01 | S5 | 1.301  | 2.056  | P | 342.990  | P | 845.208  | P | 203.198  | LOC_Os04g53190.2 |

|                   |             |    |        |        |   |          |   |          |   |          |                  |
|-------------------|-------------|----|--------|--------|---|----------|---|----------|---|----------|------------------|
| DG <sub>HPU</sub> | Os014456_01 | S5 | 1.228  | 0.000  | P | 118.601  | P | 277.843  | P | 218.931  | LOC_Os01g64650.3 |
| DG <sub>HPU</sub> | Os014473_01 | S5 | 0.000  | -1.065 | P | 456.439  | P | 473.219  | P | 990.166  | LOC_Os01g48990.1 |
| DG <sub>HPU</sub> | Os014717_01 | S5 | 2.428  | 0.000  | P | 707.821  | P | 3808.980 | P | 1916.763 | LOC_Os06g21380.1 |
| DG <sub>HPU</sub> | Os014758_01 | S5 | 0.000  | -1.130 | P | 198.237  | P | 220.375  | P | 482.270  | LOC_Os01g13120.1 |
| DG <sub>HPU</sub> | Os014760_01 | S5 | 1.592  | 0.000  | P | 682.099  | P | 2056.917 | P | 946.205  | LOC_Os04g37710.1 |
| DG <sub>HPU</sub> | Os014800_01 | S5 | 1.861  | 0.000  | P | 183.588  | P | 666.979  | P | 347.701  | LOC_Os05g50560.1 |
| DG <sub>HPU</sub> | Os014816_01 | S5 | 10.000 | 1.218  | A | 102.535  | P | 282.667  | P | 121.505  | LOC_Os03g16170.1 |
| DG <sub>HPU</sub> | Os015340_01 | S5 | 1.335  | 0.000  | P | 505.897  | P | 1276.684 | P | 1252.690 | -                |
| DG <sub>HPU</sub> | Os015676_01 | S5 | 0.000  | -1.195 | P | 306.694  | P | 246.937  | P | 565.340  | LOC_Os06g47640.1 |
| DG <sub>HPU</sub> | Os015702_01 | S5 | 1.411  | 0.000  | P | 324.426  | P | 862.605  | P | 564.222  | LOC_Os01g03310.1 |
| DG <sub>HPU</sub> | Os015728_01 | S5 | 1.321  | 0.000  | P | 355.321  | P | 887.824  | P | 768.664  | LOC_Os01g70520.1 |
| DG <sub>HPU</sub> | Os015790_01 | S5 | 1.232  | 1.463  | P | 514.465  | P | 1208.612 | P | 438.446  | -                |
| DG <sub>HPU</sub> | Os015860_01 | S5 | 1.507  | 0.000  | P | 147.879  | P | 420.313  | P | 235.589  | LOC_Os01g56180.1 |
| DG <sub>HPU</sub> | Os015868_01 | S5 | 1.205  | 1.249  | P | 179.480  | P | 413.657  | P | 174.048  | LOC_Os03g13540.1 |
| DG <sub>HPU</sub> | Os015910_01 | S5 | 1.859  | 1.686  | P | 243.485  | P | 883.224  | P | 274.496  | LOC_Os01g10250.1 |
| DG <sub>HPU</sub> | Os016064_01 | S5 | 1.451  | 0.000  | P | 154.365  | P | 421.915  | P | 253.399  | LOC_Os03g59180.2 |
| DG <sub>HPU</sub> | Os016227_01 | S5 | 1.469  | 0.000  | P | 770.356  | P | 2133.254 | P | 1686.775 | LOC_Os12g08810.1 |
| DG <sub>HPU</sub> | Os016500_01 | S5 | 1.263  | 0.000  | P | 1810.264 | P | 4344.407 | P | 4187.984 | LOC_Os02g57280.1 |
| DG <sub>HPU</sub> | Os016638_01 | S5 | 1.451  | 0.000  | P | 206.023  | P | 563.257  | P | 578.111  | -                |
| DG <sub>HPU</sub> | Os016716_01 | S5 | 1.969  | 0.000  | P | 609.111  | P | 2385.464 | P | 1633.202 | LOC_Os02g10120.1 |
| DG <sub>HPU</sub> | Os016757_01 | S5 | 1.712  | 1.711  | P | 268.768  | P | 880.397  | P | 268.859  | LOC_Os01g62760.1 |
| DG <sub>HPU</sub> | Os016758_01 | S5 | 1.414  | 0.000  | P | 260.039  | P | 693.042  | P | 517.033  | LOC_Os11g32110.4 |
| DG <sub>HPU</sub> | Os016793_01 | S5 | 1.506  | 1.907  | P | 192.869  | P | 547.963  | P | 146.085  | LOC_Os02g52780.1 |
| DG <sub>HPU</sub> | Os016867_01 | S5 | 0.000  | -1.313 | P | 271.398  | P | 243.897  | P | 605.921  | LOC_Os08g43390.1 |
| DG <sub>HPU</sub> | Os016878_01 | S5 | 1.396  | 0.000  | P | 2395.802 | P | 6304.712 | P | 4742.440 | LOC_Os02g18450.1 |
| DG <sub>HPU</sub> | Os016919_01 | S5 | 3.169  | 3.644  | P | 384.618  | P | 3458.992 | P | 276.757  | LOC_Os02g01590.1 |
| DG <sub>HPU</sub> | Os017376_01 | S5 | 1.801  | 1.351  | P | 364.177  | P | 1269.452 | P | 497.498  | LOC_Os07g48100.1 |
| DG <sub>HPU</sub> | Os017465_01 | S5 | 0.000  | -1.971 | P | 2707.336 | P | 1349.421 | P | 5291.228 | LOC_Os07g48500.1 |
| DG <sub>HPU</sub> | Os017515_01 | S5 | 10.000 | 1.347  | A | 112.634  | P | 415.705  | P | 163.440  | LOC_Os06g48990.2 |
| DG <sub>HPU</sub> | Os017521_01 | S5 | 0.000  | -1.590 | P | 234.245  | P | 186.544  | P | 561.437  | LOC_Os06g03720.1 |
| DG <sub>HPU</sub> | Os017842_01 | S5 | 0.000  | -1.333 | P | 229.912  | P | 182.341  | P | 459.488  | LOC_Os01g59980.1 |

|                   |             |    |        |        |   |          |   |          |   |          |                  |
|-------------------|-------------|----|--------|--------|---|----------|---|----------|---|----------|------------------|
| DG <sub>HPU</sub> | Os017873_01 | S5 | 10.000 | 3.003  | A | 1435.486 | P | 1287.132 | P | 160.589  | LOC_Os11g25860.1 |
| DG <sub>HPU</sub> | Os017943_01 | S5 | 0.000  | 1.357  | P | 727.284  | P | 1322.413 | P | 516.310  | LOC_Os07g12340.1 |
| DG <sub>HPU</sub> | Os018037_01 | S5 | 0.000  | 1.340  | P | 551.472  | P | 561.912  | P | 222.029  | LOC_Os02g43790.1 |
| DG <sub>HPU</sub> | Os018201_01 | S5 | 1.632  | 0.000  | P | 145.963  | P | 452.519  | P | 282.520  | LOC_Os07g05570.1 |
| DG <sub>HPU</sub> | Os018288_01 | S5 | 1.427  | 0.000  | P | 341.153  | P | 917.001  | P | 611.798  | LOC_Os02g37970.1 |
| DG <sub>HPU</sub> | Os018289_01 | S5 | 1.264  | 0.000  | P | 1734.605 | P | 4165.209 | P | 3123.834 | LOC_Os10g42299.2 |
| DG <sub>HPU</sub> | Os018342_01 | S5 | 0.000  | -1.082 | P | 287.594  | P | 336.434  | P | 712.244  | LOC_Os03g06620.1 |
| DG <sub>HPU</sub> | Os018393_01 | S5 | 1.345  | 0.000  | P | 1191.452 | P | 3027.083 | P | 2484.542 | LOC_Os09g38090.1 |
| DG <sub>HPU</sub> | Os018414_01 | S5 | -1.079 | -1.730 | P | 515.735  | P | 244.080  | P | 809.834  | LOC_Os07g28910.1 |
| DG <sub>HPU</sub> | Os018478_01 | S5 | 1.664  | 0.000  | P | 226.005  | P | 716.163  | P | 431.205  | LOC_Os05g05160.1 |
| DG <sub>HPU</sub> | Os018518_01 | S5 | 1.312  | 0.000  | P | 188.486  | P | 467.865  | P | 432.062  | LOC_Os07g38360.2 |
| DG <sub>HPU</sub> | Os018776_01 | S5 | 0.000  | -1.432 | P | 1193.349 | P | 783.239  | P | 2113.238 | LOC_Os08g03290.1 |
| DG <sub>HPU</sub> | Os018786_01 | S5 | 1.710  | 1.646  | P | 178.933  | P | 585.568  | P | 187.116  | LOC_Os03g16670.1 |
| DG <sub>HPU</sub> | Os018983_01 | S5 | 0.000  | -1.664 | P | 671.961  | P | 429.862  | P | 1362.272 | LOC_Os04g56160.1 |
| DG <sub>HPU</sub> | Os019004_01 | S5 | 1.287  | 0.000  | P | 187.453  | P | 457.505  | P | 255.400  | LOC_Os10g37340.1 |
| DG <sub>HPU</sub> | Os019071_01 | S5 | 0.000  | -1.092 | P | 283.697  | P | 235.572  | P | 502.025  | LOC_Os02g38840.2 |
| DG <sub>HPU</sub> | Os019111_01 | S5 | 1.362  | 0.000  | P | 207.038  | P | 532.041  | P | 302.098  | LOC_Os07g43330.1 |
| DG <sub>HPU</sub> | Os019113_01 | S5 | 0.000  | -1.321 | P | 434.734  | P | 397.476  | P | 992.794  | LOC_Os12g17910.1 |
| DG <sub>HPU</sub> | Os019140_01 | S5 | 0.000  | -1.206 | P | 651.254  | P | 448.774  | P | 1035.563 | -                |
| DG <sub>HPU</sub> | Os019275_01 | S5 | 0.000  | -1.253 | P | 234.724  | P | 219.354  | P | 522.913  | LOC_Os01g69970.1 |
| DG <sub>HPU</sub> | Os019634_01 | S5 | 0.000  | -1.076 | P | 1372.939 | P | 814.463  | P | 1716.969 | LOC_Os06g02380.2 |
| DG <sub>HPU</sub> | Os019636_01 | S5 | 1.503  | 0.000  | P | 621.383  | P | 1761.298 | P | 1317.008 | -                |
| DG <sub>HPU</sub> | Os020028_01 | S5 | 1.253  | 0.000  | P | 331.368  | P | 789.900  | P | 736.952  | LOC_Os02g03260.1 |
| DG <sub>HPU</sub> | Os020055_01 | S5 | 1.366  | 0.000  | P | 116.157  | P | 299.338  | P | 158.019  | LOC_Os02g47980.1 |
| DG <sub>HPU</sub> | Os020261_01 | S5 | 1.609  | 0.000  | P | 107.851  | P | 328.926  | P | 269.122  | LOC_Os01g04950.3 |
| DG <sub>HPU</sub> | Os020383_01 | S5 | -1.080 | 10.000 | P | 1789.931 | P | 846.913  | A | 204.563  | LOC_Os02g50320.1 |
| DG <sub>HPU</sub> | Os020610_01 | S5 | 0.000  | -1.292 | P | 184.850  | P | 153.478  | P | 375.712  | LOC_Os01g55290.3 |
| DG <sub>HPU</sub> | Os020653_01 | S5 | 2.133  | 1.510  | P | 202.305  | P | 887.333  | P | 311.638  | LOC_Os11g05990.1 |
| DG <sub>HPU</sub> | Os020732_01 | S5 | 0.000  | -1.406 | P | 245.266  | P | 200.512  | P | 531.411  | LOC_Os05g05950.1 |
| DG <sub>HPU</sub> | Os020837_01 | S5 | 1.373  | 0.000  | P | 204.937  | P | 530.775  | P | 570.641  | LOC_Os03g43750.1 |
| DG <sub>HPU</sub> | Os020886_01 | S5 | 1.201  | 0.000  | P | 140.659  | P | 323.430  | P | 289.924  | LOC_Os03g59470.1 |

|                   |             |    |        |        |   |          |   |          |   |          |                  |
|-------------------|-------------|----|--------|--------|---|----------|---|----------|---|----------|------------------|
| DG <sub>HPU</sub> | Os020903_01 | S5 | 1.255  | 0.000  | P | 689.968  | P | 1646.476 | P | 1518.669 | LOC_Os03g17870.1 |
| DG <sub>HPU</sub> | Os020962_01 | S5 | 10.000 | 1.616  | A | 203.670  | P | 626.995  | P | 204.569  | LOC_Os10g41930.2 |
| DG <sub>HPU</sub> | Os021048_01 | S5 | 0.000  | -1.082 | P | 640.502  | P | 453.168  | P | 959.173  | LOC_Os01g63270.1 |
| DG <sub>HPU</sub> | Os021156_01 | S5 | 1.357  | 10.000 | P | 85.960   | P | 220.241  | A | 122.561  | LOC_Os12g43720.1 |
| DG <sub>HPU</sub> | Os021165_01 | S5 | 1.339  | 0.000  | P | 201.921  | P | 510.684  | P | 352.889  | LOC_Os05g30140.1 |
| DG <sub>HPU</sub> | Os021445_01 | S5 | 1.577  | 0.000  | P | 1272.870 | P | 3796.959 | P | 1913.529 | LOC_Os08g06110.1 |
| DG <sub>HPU</sub> | Os021497_01 | S5 | 1.221  | 0.000  | P | 374.130  | P | 871.944  | P | 900.155  | LOC_Os06g40080.1 |
| DG <sub>HPU</sub> | Os021588_01 | S5 | 0.000  | -1.336 | P | 5016.758 | P | 3928.713 | P | 9919.577 | -                |
| DG <sub>HPU</sub> | Os021645_01 | S5 | 1.794  | 1.603  | P | 219.791  | P | 762.099  | P | 250.803  | LOC_Os01g12810.4 |
| DG <sub>HPU</sub> | Os021689_01 | S5 | -1.104 | 0.000  | P | 5251.987 | P | 2443.431 | P | 2223.826 | LOC_Os03g21790.1 |
| DG <sub>HPU</sub> | Os021726_01 | S5 | 1.819  | 1.404  | P | 615.032  | P | 2170.178 | P | 820.279  | LOC_Os03g06080.1 |
| DG <sub>HPU</sub> | Os021927_01 | S5 | -1.093 | -1.063 | P | 442.746  | P | 207.558  | P | 433.647  | LOC_Os05g32820.1 |
| DG <sub>HPU</sub> | Os021929_01 | S5 | 0.000  | 1.504  | P | 291.973  | P | 493.947  | P | 174.150  | LOC_Os09g30414.1 |
| DG <sub>HPU</sub> | Os021946_01 | S5 | 1.521  | 0.000  | P | 759.769  | P | 2181.022 | P | 1279.399 | LOC_Os05g50930.1 |
| DG <sub>HPU</sub> | Os021993_01 | S5 | 10.000 | 1.669  | A | 594.459  | P | 444.219  | P | 139.724  | LOC_Os01g34780.2 |
| DG <sub>HPU</sub> | Os022000_01 | S5 | 0.000  | -1.130 | P | 1541.486 | P | 1301.759 | P | 2849.007 | LOC_Os10g39410.1 |
| DG <sub>HPU</sub> | Os022133_01 | S5 | 1.433  | 0.000  | P | 99.345   | P | 268.206  | P | 155.850  | LOC_Os03g32170.1 |
| DG <sub>HPU</sub> | Os022142_01 | S5 | 1.626  | 0.000  | P | 465.259  | P | 1436.337 | P | 706.123  | LOC_Os09g31200.1 |
| DG <sub>HPU</sub> | Os022144_01 | S5 | 10.000 | -1.125 | A | 58.825   | P | 271.465  | P | 591.932  | LOC_Os01g35789.1 |
| DG <sub>HPU</sub> | Os022157_01 | S5 | 1.481  | 0.000  | P | 438.939  | P | 1224.957 | P | 1069.727 | LOC_Os08g33540.1 |
| DG <sub>HPU</sub> | Os022866_01 | S5 | 1.488  | 10.000 | P | 122.443  | P | 343.358  | A | 113.630  | LOC_Os07g48830.1 |
| DG <sub>HPU</sub> | Os023056_01 | S5 | 1.562  | 1.442  | P | 125.121  | P | 369.347  | P | 135.960  | LOC_Os04g44530.5 |
| DG <sub>HPU</sub> | Os023251_01 | S5 | 1.388  | 0.000  | P | 141.247  | P | 369.753  | P | 389.197  | -                |
| DG <sub>HPU</sub> | Os023451_01 | S5 | 1.189  | 0.000  | P | 436.180  | P | 994.703  | P | 499.857  | LOC_Os05g33514.1 |
| DG <sub>HPU</sub> | Os023508_01 | S5 | 1.839  | 0.000  | P | 988.925  | P | 3539.031 | P | 2503.083 | LOC_Os08g04430.1 |
| DG <sub>HPU</sub> | Os023514_01 | S5 | 0.000  | -1.249 | P | 271.965  | P | 215.972  | P | 513.453  | LOC_Os05g35050.1 |
| DG <sub>HPU</sub> | Os023589_01 | S5 | 10.000 | -1.402 | A | 138.649  | P | 545.549  | P | 1441.504 | LOC_Os05g05650.1 |
| DG <sub>HPU</sub> | Os023652_01 | S5 | 0.000  | 1.222  | P | 393.460  | P | 341.563  | P | 146.389  | LOC_Os04g52750.1 |
| DG <sub>HPU</sub> | Os023774_01 | S5 | 1.742  | 10.000 | P | 107.354  | P | 359.014  | A | 113.516  | LOC_Os09g38320.1 |
| DG <sub>HPU</sub> | Os023831_01 | S5 | 1.504  | 1.310  | P | 164.436  | P | 466.348  | P | 188.044  | LOC_Os08g34240.1 |
| DG <sub>HPU</sub> | Os023944_01 | S5 | 1.448  | 0.000  | P | 134.640  | P | 367.345  | P | 168.917  | LOC_Os09g28650.1 |

|                   |             |    |        |        |   |           |   |           |   |          |                  |
|-------------------|-------------|----|--------|--------|---|-----------|---|-----------|---|----------|------------------|
| DG <sub>HPU</sub> | Os023983_01 | S5 | 0.000  | -1.072 | P | 394.851   | P | 373.065   | P | 784.076  | LOC_Os02g58500.1 |
| DG <sub>HPU</sub> | Os023998_01 | S5 | -1.084 | 0.000  | P | 439.358   | P | 207.296   | P | 170.095  | LOC_Os08g42570.1 |
| DG <sub>HPU</sub> | Os024079_01 | S5 | 1.330  | 0.000  | P | 168.484   | P | 423.596   | P | 259.822  | LOC_Os07g24230.1 |
| DG <sub>HPU</sub> | Os024254_01 | S5 | 0.000  | 1.370  | P | 281.824   | P | 381.351   | P | 147.536  | LOC_Os09g26780.1 |
| DG <sub>HPU</sub> | Os024270_01 | S5 | 0.000  | 1.243  | P | 317.755   | P | 563.322   | P | 238.033  | LOC_Os05g36990.1 |
| DG <sub>HPU</sub> | Os024767_01 | S5 | 1.653  | 0.000  | P | 204.448   | P | 642.942   | P | 302.190  | LOC_Os03g59360.1 |
| DG <sub>HPU</sub> | Os024796_01 | S5 | 1.209  | 0.000  | P | 207.885   | P | 480.637   | P | 560.109  | LOC_Os02g35500.1 |
| DG <sub>HPU</sub> | Os024813_01 | S5 | 1.579  | 0.000  | P | 274.992   | P | 821.653   | P | 630.539  | LOC_Os06g06560.1 |
| DG <sub>HPU</sub> | Os024863_01 | S5 | 1.488  | 0.000  | P | 129.618   | P | 363.656   | P | 240.064  | LOC_Os03g05800.1 |
| DG <sub>HPU</sub> | Os024959_01 | S5 | 0.000  | -1.202 | P | 923.354   | P | 755.058   | P | 1737.016 | LOC_Os02g08150.1 |
| DG <sub>HPU</sub> | Os025809_01 | S5 | 0.000  | -1.800 | P | 382.891   | P | 277.552   | P | 966.215  | LOC_Os09g15230.1 |
| DG <sub>HPU</sub> | Os026266_01 | S5 | 1.486  | 10.000 | P | 436.623   | P | 1222.878  | A | 1749.183 | -                |
| DG <sub>HPU</sub> | Os026390_01 | S5 | 0.000  | 1.437  | P | 568.249   | P | 1211.884  | P | 447.552  | LOC_Os05g25040.2 |
| DG <sub>HPU</sub> | Os026464_01 | S5 | 0.000  | 1.651  | P | 1608.410  | P | 2132.330  | P | 679.025  | LOC_Os09g34100.1 |
| DG <sub>HPU</sub> | Os026558_01 | S5 | 1.578  | 10.000 | P | 269.639   | P | 805.153   | A | 1058.449 | LOC_Os08g42810.1 |
| DG <sub>HPU</sub> | Os026917_01 | S5 | 0.000  | 1.513  | P | 10124.574 | P | 14571.149 | P | 5106.447 | LOC_Os04g52250.1 |
| DG <sub>HPU</sub> | Os026920_01 | S5 | 1.382  | 10.000 | P | 401.702   | P | 1046.795  | A | 1488.549 | LOC_Os07g28290.1 |
| DG <sub>HPU</sub> | Os027379_02 | S5 | -1.377 | 0.000  | P | 4267.882  | P | 1643.163  | P | 2073.987 | -                |
| DG <sub>HPU</sub> | Os027659_01 | S5 | -1.417 | 0.000  | P | 7052.702  | P | 2641.402  | P | 4920.744 | LOC_Os02g02890.1 |
| DG <sub>HPU</sub> | Os027678_01 | S5 | 0.000  | 1.281  | P | 949.807   | P | 1161.294  | P | 478.024  | -                |
| DG <sub>HPU</sub> | Os027686_01 | S5 | 0.000  | 1.577  | P | 231.451   | P | 505.836   | P | 169.604  | LOC_Os06g04630.1 |
| DG <sub>HPU</sub> | Os028382_01 | S5 | 0.000  | -1.076 | P | 299.083   | P | 218.893   | P | 461.433  | LOC_Os06g02580.1 |
| DG <sub>HPU</sub> | Os028407_01 | S5 | 1.667  | 10.000 | P | 721.771   | P | 2291.550  | A | 2850.369 | LOC_Os08g44540.1 |
| DG <sub>HPU</sub> | Os029195_01 | S5 | -1.178 | 0.000  | P | 552.937   | P | 244.383   | P | 489.340  | LOC_Os01g56420.1 |
| DG <sub>HPU</sub> | Os029226_01 | S5 | 0.000  | 1.331  | P | 328.329   | P | 654.902   | P | 260.301  | LOC_Os05g46040.1 |
| DG <sub>HPU</sub> | Os029577_01 | S5 | 0.000  | -1.326 | P | 761.859   | P | 383.709   | P | 961.912  | LOC_Os05g50340.1 |
| DG <sub>HPU</sub> | Os029694_01 | S5 | -1.236 | 0.000  | P | 1569.632  | P | 666.608   | P | 811.132  | LOC_Os07g41580.1 |
| DG <sub>HPU</sub> | Os030167_01 | S5 | 0.000  | -1.768 | P | 266.088   | P | 223.197   | P | 760.193  | LOC_Os01g18584.1 |
| DG <sub>HPU</sub> | Os030190_01 | S5 | -1.613 | 0.000  | P | 951.767   | P | 311.200   | P | 402.938  | -                |
| DG <sub>HPU</sub> | Os030789_01 | S5 | -1.110 | 10.000 | P | 5357.315  | P | 2482.464  | A | 199.261  | LOC_Os01g48600.1 |
| DG <sub>HPU</sub> | Os031095_01 | S5 | 0.000  | -1.881 | P | 190.487   | P | 143.521   | P | 528.493  | LOC_Os02g13350.1 |

|                   |             |    |        |        |   |           |   |          |   |           |                  |
|-------------------|-------------|----|--------|--------|---|-----------|---|----------|---|-----------|------------------|
| DG <sub>HPU</sub> | Os031927_01 | S5 | 1.431  | 1.661  | P | 706.732   | P | 1905.262 | P | 602.521   | LOC_Os03g07960.1 |
| DG <sub>HPU</sub> | Os033430_01 | S5 | 10.000 | -1.172 | A | 161.926   | P | 560.254  | P | 1262.814  | LOC_Os10g22630.1 |
| DG <sub>HPU</sub> | Os033786_01 | S5 | 1.600  | 2.138  | P | 243.514   | P | 738.242  | P | 167.766   | LOC_Os05g05410.1 |
| DG <sub>HPU</sub> | Os034112_01 | S5 | -1.102 | 0.000  | P | 940.166   | P | 437.919  | P | 341.793   | LOC_Os02g40130.1 |
| DG <sub>HPU</sub> | Os034833_01 | S5 | 0.000  | 1.929  | P | 366.334   | P | 567.259  | P | 149.009   | LOC_Os10g35070.4 |
| DG <sub>HPU</sub> | Os035558_01 | S5 | -1.262 | 0.000  | P | 17524.279 | P | 7307.398 | P | 15062.712 | LOC_Os06g47360.1 |
| DG <sub>HPU</sub> | Os035594_01 | S5 | 1.982  | 10.000 | P | 267.852   | P | 1057.901 | A | 967.402   | LOC_Os12g15680.1 |
| DG <sub>HPU</sub> | Os035852_01 | S5 | 1.209  | 0.000  | P | 419.920   | P | 970.712  | P | 618.946   | LOC_Os04g41570.3 |
| DG <sub>HPU</sub> | Os036231_01 | S5 | -1.090 | 0.000  | P | 1934.736  | P | 908.697  | P | 1032.708  | LOC_Os03g46200.1 |
| DG <sub>HPU</sub> | Os036440_01 | S5 | 1.918  | 10.000 | P | 212.892   | P | 804.242  | A | 862.311   | LOC_Os01g35254.1 |
| DG <sub>HPU</sub> | Os036576_01 | S5 | -1.154 | -1.357 | P | 367.552   | P | 165.151  | P | 423.159   | LOC_Os03g31690.1 |
| DG <sub>HPU</sub> | Os037907_01 | S5 | 1.346  | 10.000 | P | 137.888   | P | 350.483  | A | 353.593   | LOC_Os03g12160.1 |
| DG <sub>HPU</sub> | Os038478_01 | S5 | 0.000  | -1.520 | P | 342.867   | P | 256.355  | P | 735.229   | LOC_Os01g44390.1 |
| DG <sub>HPU</sub> | Os038480_01 | S5 | 0.000  | -1.594 | P | 645.195   | P | 333.207  | P | 1005.764  | LOC_Os01g44370.1 |
| DG <sub>HPU</sub> | Os038506_01 | S5 | 0.000  | -1.530 | P | 1558.261  | P | 942.422  | P | 2721.700  | LOC_Os02g09150.2 |
| DG <sub>HPU</sub> | Os039150_01 | S5 | -1.366 | 10.000 | P | 576.198   | P | 223.531  | A | 48.853    | LOC_Os02g18070.1 |
| DG <sub>HPU</sub> | Os039379_01 | S5 | 1.255  | 0.000  | P | 1131.971  | P | 2701.499 | P | 2259.514  | LOC_Os04g51510.1 |
| DG <sub>HPU</sub> | Os039715_01 | S5 | 0.000  | -1.409 | P | 329.364   | P | 212.525  | P | 564.324   | LOC_Os01g21990.1 |
| DG <sub>HPU</sub> | Os040011_01 | S5 | 0.000  | 1.272  | P | 444.771   | P | 533.392  | P | 220.804   | LOC_Os04g07930.1 |
| DG <sub>HPU</sub> | Os040248_01 | S5 | -1.528 | -1.433 | P | 1607.206  | P | 557.478  | P | 1504.996  | LOC_Os03g37960.1 |
| DG <sub>HPU</sub> | Os041929_01 | S5 | 1.474  | 0.000  | P | 266.127   | P | 739.039  | P | 627.911   | LOC_Os06g28320.1 |
| DG <sub>HPU</sub> | Os042038_01 | S5 | 0.000  | -2.063 | P | 318.063   | P | 202.829  | P | 847.311   | LOC_Os06g15990.1 |
| DG <sub>HPU</sub> | Os042267_01 | S5 | -1.177 | 0.000  | P | 595.273   | P | 263.289  | P | 526.998   | LOC_Os10g24970.1 |
| DG <sub>HPU</sub> | Os042617_01 | S5 | 0.000  | 1.311  | P | 270.209   | P | 363.827  | P | 146.644   | LOC_Os02g36490.2 |
| DG <sub>HPU</sub> | Os042725_01 | S5 | -1.072 | 10.000 | P | 392.538   | P | 186.737  | A | 33.071    | LOC_Os07g35740.1 |
| DG <sub>HPU</sub> | Os043506_01 | S5 | 0.000  | 1.249  | P | 1348.549  | P | 2761.156 | P | 1162.080  | LOC_Os07g35880.1 |
| DG <sub>HPU</sub> | Os043740_01 | S5 | -1.470 | 0.000  | P | 7662.097  | P | 2766.201 | P | 4514.255  | LOC_Os04g11956.1 |
| DG <sub>HPU</sub> | Os044283_01 | S5 | 10.000 | -1.359 | A | 100.997   | P | 589.482  | P | 1511.648  | -                |
| DG <sub>HPU</sub> | Os044585_01 | S5 | -1.170 | 10.000 | P | 736.974   | P | 327.513  | A | 87.597    | LOC_Os05g14360.1 |
| DG <sub>HPU</sub> | Os044660_01 | S5 | 0.000  | 1.234  | P | 330.768   | P | 350.398  | P | 148.968   | LOC_Os11g43200.1 |
| DG <sub>HPU</sub> | Os044913_01 | S5 | 0.000  | 1.402  | P | 594.980   | P | 1092.528 | P | 413.552   | LOC_Os02g27300.1 |

|                   |             |    |        |        |   |          |   |          |   |           |                  |
|-------------------|-------------|----|--------|--------|---|----------|---|----------|---|-----------|------------------|
| DG <sub>HPU</sub> | Os045140_01 | S5 | -1.105 | 0.000  | P | 428.528  | P | 199.245  | P | 157.457   | LOC_Os08g27460.1 |
| DG <sub>HPU</sub> | Os045347_01 | S5 | 10.000 | -1.099 | A | 134.102  | P | 692.322  | P | 1483.118  | LOC_Os06g18120.1 |
| DG <sub>HPU</sub> | Os045783_01 | S5 | 1.453  | 10.000 | P | 164.540  | P | 450.543  | A | 492.560   | -                |
| DG <sub>HPU</sub> | Os046309_01 | S5 | 0.000  | 1.452  | P | 450.542  | P | 454.027  | P | 165.900   | LOC_Os08g06070.1 |
| DG <sub>HPU</sub> | Os046433_01 | S5 | 0.000  | -1.079 | P | 690.538  | P | 507.417  | P | 1071.585  | LOC_Os12g17910.1 |
| DG <sub>HPU</sub> | Os046795_01 | S5 | 0.000  | 1.424  | P | 217.968  | P | 344.389  | P | 128.356   | LOC_Os04g43400.1 |
| DG <sub>HPU</sub> | Os046888_01 | S5 | 1.556  | 1.349  | P | 493.435  | P | 1450.627 | P | 569.650   | LOC_Os03g25460.1 |
| DG <sub>HPU</sub> | Os048525_01 | S5 | -1.919 | 0.000  | P | 5048.548 | P | 1335.431 | P | 2205.190  | LOC_Os07g14750.1 |
| DG <sub>HPU</sub> | Os048713_01 | S5 | -1.222 | -1.304 | P | 609.566  | P | 261.262  | P | 645.008   | LOC_Os11g27090.1 |
| DG <sub>HPU</sub> | Os048731_01 | S5 | 0.000  | -1.371 | P | 423.332  | P | 208.240  | P | 538.739   | -                |
| DG <sub>HPU</sub> | Os050784_01 | S5 | -1.076 | 0.000  | P | 567.251  | P | 269.119  | P | 339.936   | LOC_Os11g27640.1 |
| DG <sub>HPU</sub> | Os050787_01 | S5 | -1.425 | 0.000  | P | 1363.258 | P | 507.861  | P | 650.464   | LOC_Os03g28980.1 |
| DG <sub>HPU</sub> | Os051647_01 | S5 | 1.453  | 0.000  | P | 160.548  | P | 439.405  | P | 406.832   | -                |
| DG <sub>HPU</sub> | Os051932_01 | S5 | 1.587  | 0.000  | P | 1736.786 | P | 5218.792 | P | 3138.886  | LOC_Os06g04030.1 |
| DG <sub>HPU</sub> | Os051940_01 | S5 | 0.000  | -1.382 | P | 1268.171 | P | 1239.701 | P | 3230.521  | LOC_Os10g39410.1 |
| DG <sub>HPU</sub> | Os051956_01 | S5 | 0.000  | -1.346 | P | 7161.984 | P | 5335.476 | P | 13558.571 | LOC_Os07g37240.1 |
| DG <sub>HPU</sub> | Os051957_01 | S5 | 0.000  | -1.603 | P | 638.335  | P | 422.507  | P | 1283.642  | LOC_Os11g26850.2 |
| DG <sub>HPU</sub> | Os051973_01 | S5 | 0.000  | -1.219 | P | 5805.996 | P | 5607.101 | P | 13048.773 | LOC_Os01g45274.1 |
| DG <sub>HPU</sub> | Os051980_01 | S5 | 0.000  | -1.462 | P | 727.866  | P | 624.850  | P | 1721.491  | LOC_Os02g27030.1 |
| DG <sub>HPU</sub> | Os051997_01 | S5 | 2.168  | 0.000  | P | 135.121  | P | 607.204  | P | 347.749   | LOC_Os04g54280.1 |
| DG <sub>HPU</sub> | Os052035_01 | S5 | 1.233  | 0.000  | P | 282.231  | P | 663.424  | P | 476.120   | LOC_Os01g37800.1 |
| DG <sub>HPU</sub> | Os052080_01 | S5 | 1.217  | 0.000  | P | 144.762  | P | 336.566  | P | 371.278   | LOC_Os08g44480.2 |
| DG <sub>HPU</sub> | Os052094_01 | S5 | 1.192  | 0.000  | P | 168.127  | P | 384.100  | P | 283.458   | LOC_Os05g44050.1 |
| DG <sub>HPU</sub> | Os052111_01 | S5 | 1.476  | 0.000  | P | 280.929  | P | 781.440  | P | 568.723   | LOC_Os09g31482.3 |
| DG <sub>HPU</sub> | Os052140_01 | S5 | 1.581  | 0.000  | P | 746.703  | P | 2233.431 | P | 2023.913  | LOC_Os08g43560.1 |
| DG <sub>HPU</sub> | Os052148_01 | S5 | 1.526  | 0.000  | P | 428.680  | P | 1234.554 | P | 935.047   | -                |
| DG <sub>HPU</sub> | Os052214_01 | S5 | 0.000  | 2.415  | P | 324.739  | P | 735.001  | P | 137.816   | -                |
| DG <sub>HPU</sub> | Os052236_01 | S5 | 1.299  | 0.000  | P | 357.439  | P | 879.626  | P | 920.030   | LOC_Os01g50760.1 |
| DG <sub>HPU</sub> | Os052259_01 | S5 | 1.550  | 0.000  | P | 191.083  | P | 559.510  | P | 487.629   | LOC_Os08g19650.1 |
| DG <sub>HPU</sub> | Os052331_01 | S5 | 1.269  | 0.000  | P | 224.549  | P | 541.290  | P | 609.304   | LOC_Os04g32710.1 |
| DG <sub>HPU</sub> | Os052360_01 | S5 | 1.307  | 0.000  | P | 164.327  | P | 406.673  | P | 444.285   | LOC_Os03g50070.1 |

|                   |             |    |        |        |   |          |   |          |   |           |                  |
|-------------------|-------------|----|--------|--------|---|----------|---|----------|---|-----------|------------------|
| DG <sub>HPU</sub> | Os052464_01 | S5 | 1.239  | 0.000  | P | 137.737  | P | 325.080  | P | 196.016   | LOC_Os02g50210.1 |
| DG <sub>HPU</sub> | Os052515_01 | S5 | 1.308  | 0.000  | P | 193.010  | P | 477.773  | P | 262.199   | -                |
| DG <sub>HPU</sub> | Os052535_01 | S5 | 1.718  | 0.000  | P | 1137.289 | P | 3741.575 | P | 2566.886  | LOC_Os03g54160.2 |
| DG <sub>HPU</sub> | Os052559_01 | S5 | 1.395  | 0.000  | P | 302.129  | P | 794.724  | P | 855.196   | LOC_Os01g48690.1 |
| DG <sub>HPU</sub> | Os052580_01 | S5 | 1.397  | 0.000  | P | 261.905  | P | 689.662  | P | 323.055   | LOC_Os01g69030.3 |
| DG <sub>HPU</sub> | Os052672_01 | S5 | 0.000  | 1.256  | P | 294.376  | P | 545.377  | P | 228.374   | LOC_Os01g62810.2 |
| DG <sub>HPU</sub> | Os052727_01 | S5 | 2.212  | 0.000  | P | 623.292  | P | 2888.121 | P | 1328.652  | LOC_Os01g64660.2 |
| DG <sub>HPU</sub> | Os053523_01 | S5 | 1.899  | 0.000  | P | 141.792  | P | 528.887  | P | 320.684   | LOC_Os02g45520.2 |
| DG <sub>HPU</sub> | Os053553_01 | S5 | 1.438  | 0.000  | P | 133.962  | P | 362.955  | P | 216.427   | LOC_Os01g54880.1 |
| DG <sub>HPU</sub> | Os053602_01 | S5 | 0.000  | 1.272  | P | 284.713  | P | 442.704  | P | 183.324   | -                |
| DG <sub>HPU</sub> | Os053716_01 | S5 | 0.000  | 1.287  | P | 1804.475 | P | 1651.040 | P | 676.377   | LOC_Os01g42294.1 |
| DG <sub>HPU</sub> | Os054035_01 | S5 | 2.204  | 10.000 | P | 197.735  | P | 911.267  | A | 145.590   | -                |
| DG <sub>HPU</sub> | Os054397_01 | S5 | 1.504  | 0.000  | P | 131.998  | P | 374.505  | P | 204.872   | LOC_Os10g28200.1 |
| DG <sub>HPU</sub> | Os054429_01 | S5 | -1.325 | 0.000  | P | 381.226  | P | 152.154  | P | 183.286   | LOC_Os12g38051.1 |
| DG <sub>HPU</sub> | Os054452_01 | S5 | 0.000  | -1.260 | P | 4527.803 | P | 4287.447 | P | 10266.665 | LOC_Os07g04840.1 |
| DG <sub>HPU</sub> | Os054471_01 | S5 | 0.000  | 1.234  | P | 573.241  | P | 482.948  | P | 205.380   | LOC_Os10g40530.1 |
| DG <sub>HPU</sub> | Os054482_01 | S5 | -1.139 | -1.743 | P | 987.621  | P | 448.371  | P | 1500.721  | LOC_Os05g49890.1 |
| DG <sub>HPU</sub> | Os054485_01 | S5 | 1.451  | 0.000  | P | 295.881  | P | 809.114  | P | 834.769   | LOC_Os10g39130.1 |
| DG <sub>HPU</sub> | Os054487_01 | S5 | 0.000  | -1.472 | P | 911.794  | P | 687.050  | P | 1905.912  | LOC_Os06g04020.1 |
| DG <sub>HPU</sub> | Os054491_01 | S5 | 0.000  | -1.126 | P | 573.033  | P | 525.217  | P | 1146.032  | -                |
| DG <sub>HPU</sub> | Os054550_01 | S5 | 0.000  | -1.120 | P | 418.917  | P | 266.289  | P | 578.861   | LOC_Os06g04070.1 |
| DG <sub>HPU</sub> | Os054562_01 | S5 | 1.348  | 2.191  | P | 1488.457 | P | 3787.826 | P | 829.543   | LOC_Os01g21250.1 |
| DG <sub>HPU</sub> | Os054590_01 | S5 | 10.000 | 3.650  | A | 191.650  | P | 2204.687 | P | 175.625   | LOC_Os03g09250.2 |
| DG <sub>HPU</sub> | Os054627_01 | S5 | 0.000  | -1.530 | P | 472.621  | P | 294.987  | P | 852.053   | LOC_Os01g73940.1 |
| DG <sub>HPU</sub> | Os054634_01 | S5 | 1.496  | 0.000  | P | 742.355  | P | 2093.976 | P | 937.424   | LOC_Os10g32810.1 |
| DG <sub>HPU</sub> | Os054641_01 | S5 | 1.518  | 0.000  | P | 739.282  | P | 2117.015 | P | 1267.601  | LOC_Os01g60410.3 |
| DG <sub>HPU</sub> | Os054673_01 | S5 | 1.281  | 0.000  | P | 393.037  | P | 955.159  | P | 552.805   | LOC_Os03g55540.1 |
| DG <sub>HPU</sub> | Os054727_01 | S5 | 1.356  | 0.000  | P | 255.292  | P | 653.636  | P | 603.723   | LOC_Os01g61670.1 |
| DG <sub>HPU</sub> | Os054734_02 | S5 | 1.617  | 10.000 | P | 223.470  | P | 685.517  | A | 782.423   | LOC_Os06g03486.1 |
| DG <sub>HPU</sub> | Os054741_01 | S5 | 10.000 | -3.906 | A | 67.440   | P | 225.190  | P | 3375.287  | -                |
| DG <sub>HPU</sub> | Os054785_01 | S5 | 1.643  | 0.000  | P | 99.077   | P | 309.496  | P | 219.255   | LOC_Os01g09220.1 |



|                   |             |    |                  |          |   |                  |   |              |   |          |                  |         |
|-------------------|-------------|----|------------------|----------|---|------------------|---|--------------|---|----------|------------------|---------|
| DG <sub>HPU</sub> | Os054838_01 | S5 | 0.000            | -1.174   | P | 182.013          | P | 186.489      | P | 420.748  | LOC_Os03g13800.1 |         |
| DG <sub>HPU</sub> | Os054937_01 | S5 | 0.000            | -1.133   | P | 145.339          | P | 154.958      | P | 339.861  | LOC_Os02g11740.1 |         |
| DG <sub>HPU</sub> | Os054941_01 | S5 | 1.430            | 0.000    | P | 302.486          | P | 815.256      | P | 683.005  | LOC_Os09g07920.1 |         |
| DG <sub>HPU</sub> | Os055014_01 | S5 | 1.310            | 0.000    | P | 190.259          | P | 471.696      | P | 454.912  | LOC_Os06g01700.1 |         |
| DG <sub>HPU</sub> | Os055042_01 | S5 | 1.512            | 10.000   | P | 148.327          | P | 422.913      | A | 210.443  | LOC_Os09g06464.1 |         |
| DG <sub>HPU</sub> | Os055136_01 | S5 | 1.553            | 0.000    | P | 165.629          | P | 485.884      | P | 355.109  | LOC_Os07g46520.1 |         |
| DG <sub>HPU</sub> | Os055148_01 | S5 | 1.445            | 0.000    | P | 442.986          | P | 1206.038     | P | 745.871  | LOC_Os03g55030.1 |         |
| DG <sub>HPU</sub> | Os055214_01 | S5 | 1.184            | 0.000    | P | 122.719          | P | 278.862      | P | 255.586  | LOC_Os01g40340.1 |         |
| DG <sub>HPU</sub> | Os055398_01 | S5 | 0.000            | -1.069   | P | 118.075          | P | 127.379      | P | 267.228  | -                |         |
| DG <sub>HPU</sub> | Os055470_01 | S5 | 1.937            | 2.056    | P | 234.278          | P | 897.371      | P | 215.753  | LOC_Os04g45810.1 |         |
| DG <sub>HPU</sub> | Os055517_01 | S5 | 1.449            | 0.000    | P | 137.840          | P | 376.415      | P | 387.187  | LOC_Os02g10860.1 |         |
| DG <sub>HPU</sub> | Os055679_01 | S5 | 10.000           | -1.864   | A | 98.417           | P | 207.094      | P | 754.109  | LOC_Os01g12270.1 |         |
| DG <sub>HPU</sub> | Os055766_02 | S5 | 1.431            | 0.000    | P | 214.040          | P | 577.043      | P | 291.185  | -                |         |
| DG <sub>HPU</sub> | Os056149_01 | S5 | -1.276           | -1.115   | P | 6215.269         | P | 2566.908     | P | 5559.825 | LOC_Os01g22249.1 |         |
| DG <sub>HPU</sub> | Os056222_01 | S5 | 0.000            | 1.261    | P | 1332.570         | P | 1366.157     | P | 569.906  | LOC_Os06g01580.1 |         |
| DG <sub>HPU</sub> | Os056250_01 | S5 | 0.000            | 1.639    | P | 496.888          | P | 935.017      | P | 300.117  | LOC_Os04g33490.1 |         |
| DG <sub>HPU</sub> | Os056390_01 | S5 | 0.000            | 1.435    | P | 904.456          | P | 887.282      | P | 328.110  | LOC_Os01g68330.1 |         |
| DG <sub>HPU</sub> | Os056782_01 | S5 | -1.275           | 0.000    | P | 531.848          | P | 219.739      | P | 278.097  | LOC_Os04g09530.1 |         |
| DG <sub>HPU</sub> | Os056903_02 | S5 | -1.112           | -2.124   | P | 344.219          | P | 159.298      | P | 694.326  | LOC_Os01g59510.1 |         |
| DG <sub>HPU</sub> | Os056920_02 | S5 | 0.000            | -1.247   | P | 1511.554         | P | 836.804      | P | 1985.607 | -                |         |
| DG <sub>HPU</sub> | Os056928_02 | S5 | -1.116           | -1.782   | P | 3785.857         | P | 1747.079     | P | 6009.075 | LOC_Os09g27030.3 |         |
| DG <sub>HPU</sub> | Os056946_01 | S5 | 0.000            | 1.531    | P | 1006.473         | P | 1037.356     | P | 358.968  | LOC_Os05g34770.1 |         |
| DG <sub>HPU</sub> | Os057021_02 | S5 | 0.000            | 1.245    | P | 379.539          | P | 439.716      | P | 185.459  | LOC_Os02g11050.1 |         |
| DG <sub>HPU</sub> | Os057253_02 | S5 | 0.000            | -1.070   | P | 187.214          | P | 213.224      | P | 447.740  | LOC_Os05g39760.1 |         |
| DG <sub>HPU</sub> | Os057274_02 | S5 | 1.437            | 0.000    | P | 1196.709         | P | 3239.749     | P | 2736.959 | LOC_Os05g38640.1 |         |
| DG <sub>HPU</sub> | Os057301_02 | S5 | 1.446            | 0.000    | P | 463.327          | P | 1262.751     | P | 1018.292 | LOC_Os03g04710.1 |         |
| DG <sub>HPU</sub> | Os057402_02 | S5 | 1.386            | 10.000   | P | 141.132          | P | 368.814      | A | 90.419   | -                |         |
| DG <sub>HPU</sub> | Os057481_02 | S5 | 1.455            | 2.406    | P | 670.569          | P | 1838.851     | P | 347.057  | LOC_Os04g43390.1 |         |
| DG <sub>HPU</sub> | Os057595_02 | S5 | 0.000            | -1.362   | P | 891.932          | P | 752.751      | P | 1935.402 | LOC_Os05g49610.1 |         |
| DG <sub>HPU</sub> | GeneID      | S4 | log2(Ratio(L/9)) |          |   | log2(Ratio(L/P)) |   | He_9311.flag |   | He_9311  | He_LYP9.flag     | He_LYP9 |
|                   |             |    | He_PA64s.flag    | He_PA64s |   | TIGR5.id         |   |              |   |          |                  |         |

|                   |             |    |        |        |   |          |   |          |   |          |                  |
|-------------------|-------------|----|--------|--------|---|----------|---|----------|---|----------|------------------|
| DG <sub>HPU</sub> | Os000198_01 | S4 | -1.438 | 0.000  | P | 630.267  | P | 232.644  | P | 343.503  | LOC_Os05g27820.2 |
| DG <sub>HPU</sub> | Os000238_01 | S4 | -1.362 | -1.410 | P | 377.444  | P | 146.851  | P | 390.285  | LOC_Os05g36050.1 |
| DG <sub>HPU</sub> | Os000242_01 | S4 | -1.384 | 0.000  | P | 429.805  | P | 164.662  | P | 282.176  | LOC_Os12g05040.3 |
| DG <sub>HPU</sub> | Os000249_01 | S4 | 0.000  | -1.351 | P | 235.277  | P | 190.925  | P | 486.941  | LOC_Os03g58810.1 |
| DG <sub>HPU</sub> | Os000312_01 | S4 | -2.003 | 0.000  | P | 841.318  | P | 209.933  | P | 326.020  | LOC_Os06g04240.1 |
| DG <sub>HPU</sub> | Os000342_01 | S4 | 0.000  | -1.233 | P | 310.664  | P | 339.072  | P | 797.168  | LOC_Os10g34180.2 |
| DG <sub>HPU</sub> | Os000389_01 | S4 | -1.183 | 0.000  | P | 886.391  | P | 390.318  | P | 676.545  | LOC_Os05g27730.1 |
| DG <sub>HPU</sub> | Os000416_01 | S4 | -2.068 | 0.000  | P | 5057.019 | P | 1206.392 | P | 2052.593 | LOC_Os08g39450.1 |
| DG <sub>HPU</sub> | Os000458_01 | S4 | -1.260 | 0.000  | P | 777.665  | P | 324.780  | P | 589.202  | LOC_Os12g04260.1 |
| DG <sub>HPU</sub> | Os000590_01 | S4 | -1.289 | 0.000  | P | 558.200  | P | 228.404  | P | 328.798  | LOC_Os05g03590.1 |
| DG <sub>HPU</sub> | Os000665_01 | S4 | 0.000  | -1.424 | P | 182.587  | P | 211.592  | P | 567.620  | LOC_Os02g48640.1 |
| DG <sub>HPU</sub> | Os000694_01 | S4 | 0.000  | -1.590 | P | 283.889  | P | 269.969  | P | 812.470  | LOC_Os02g49640.1 |
| DG <sub>HPU</sub> | Os000781_01 | S4 | 0.000  | 1.787  | P | 238.119  | P | 473.879  | P | 137.274  | LOC_Os01g16010.1 |
| DG <sub>HPU</sub> | Os000784_01 | S4 | -1.124 | 0.000  | P | 808.419  | P | 370.889  | P | 298.983  | LOC_Os07g01320.1 |
| DG <sub>HPU</sub> | Os000838_01 | S4 | -1.161 | 0.000  | P | 400.080  | P | 178.882  | P | 246.131  | LOC_Os05g22370.1 |
| DG <sub>HPU</sub> | Os000897_01 | S4 | -1.176 | 0.000  | P | 486.815  | P | 215.409  | P | 261.432  | LOC_Os03g55490.1 |
| DG <sub>HPU</sub> | Os001035_01 | S4 | 0.000  | -1.150 | P | 336.505  | P | 355.719  | P | 789.388  | LOC_Os01g61070.1 |
| DG <sub>HPU</sub> | Os001105_01 | S4 | 0.000  | -1.262 | P | 337.617  | P | 227.445  | P | 545.405  | LOC_Os03g53580.1 |
| DG <sub>HPU</sub> | Os001272_01 | S4 | -1.645 | 0.000  | P | 954.131  | P | 305.105  | P | 289.304  | -                |
| DG <sub>HPU</sub> | Os001430_01 | S4 | 0.000  | -1.487 | P | 408.250  | P | 240.307  | P | 673.463  | LOC_Os05g05560.1 |
| DG <sub>HPU</sub> | Os001460_01 | S4 | 0.000  | -1.219 | P | 427.606  | P | 264.657  | P | 616.008  | LOC_Os11g33970.1 |
| DG <sub>HPU</sub> | Os001715_01 | S4 | 1.541  | 0.000  | P | 1115.202 | P | 3244.107 | P | 1319.637 | LOC_Os07g38240.1 |
| DG <sub>HPU</sub> | Os001749_01 | S4 | 1.747  | 1.966  | P | 880.075  | P | 2954.274 | P | 756.115  | LOC_Os01g65530.1 |
| DG <sub>HPU</sub> | Os001758_01 | S4 | 0.000  | 1.416  | P | 899.167  | P | 936.072  | P | 350.738  | LOC_Os04g18790.1 |
| DG <sub>HPU</sub> | Os001957_01 | S4 | -1.401 | 0.000  | P | 1658.840 | P | 628.333  | P | 615.711  | LOC_Os07g38230.1 |
| DG <sub>HPU</sub> | Os002092_01 | S4 | 0.000  | -1.185 | P | 2498.968 | P | 1458.924 | P | 3316.998 | LOC_Os02g04510.1 |
| DG <sub>HPU</sub> | Os002390_01 | S4 | 0.000  | -1.172 | P | 1022.315 | P | 1267.645 | P | 2855.966 | LOC_Os07g05360.1 |
| DG <sub>HPU</sub> | Os002451_01 | S4 | -1.292 | 0.000  | P | 774.992  | P | 316.462  | P | 625.995  | LOC_Os01g47730.1 |
| DG <sub>HPU</sub> | Os002516_02 | S4 | 0.000  | -1.603 | P | 427.533  | P | 247.656  | P | 752.251  | -                |
| DG <sub>HPU</sub> | Os002633_01 | S4 | 0.000  | 1.587  | P | 644.805  | P | 595.106  | P | 198.075  | LOC_Os03g22960.1 |
| DG <sub>HPU</sub> | Os002753_01 | S4 | -1.075 | 0.000  | P | 613.780  | P | 291.404  | P | 388.013  | LOC_Os12g32610.1 |

|                   |             |    |        |        |   |          |   |          |   |          |                  |
|-------------------|-------------|----|--------|--------|---|----------|---|----------|---|----------|------------------|
| DG <sub>HPU</sub> | Os003568_02 | S4 | -1.806 | 0.000  | P | 1628.723 | P | 465.749  | P | 1018.335 | -                |
| DG <sub>HPU</sub> | Os004380_01 | S4 | 0.000  | -1.162 | P | 170.170  | P | 243.778  | P | 545.339  | LOC_Os08g06460.1 |
| DG <sub>HPU</sub> | Os004928_01 | S4 | 0.000  | 1.405  | P | 187.670  | P | 249.723  | P | 94.318   | LOC_Os11g37950.1 |
| DG <sub>HPU</sub> | Os005117_01 | S4 | 0.000  | -1.229 | P | 237.096  | P | 243.901  | P | 571.634  | LOC_Os01g13150.1 |
| DG <sub>HPU</sub> | Os005218_01 | S4 | 0.000  | -1.156 | P | 247.251  | P | 259.597  | P | 578.473  | -                |
| DG <sub>HPU</sub> | Os006128_01 | S4 | -1.259 | 0.000  | P | 1306.176 | P | 545.739  | P | 1019.373 | -                |
| DG <sub>HPU</sub> | Os006659_01 | S4 | 0.000  | 1.474  | P | 303.719  | P | 276.560  | P | 99.589   | -                |
| DG <sub>HPU</sub> | Os006922_01 | S4 | 0.000  | 1.426  | P | 438.338  | P | 446.868  | P | 166.273  | -                |
| DG <sub>HPU</sub> | Os007387_01 | S4 | 0.000  | 1.539  | P | 369.249  | P | 405.468  | P | 139.523  | -                |
| DG <sub>HPU</sub> | Os007689_01 | S4 | 1.485  | 10.000 | P | 108.159  | P | 302.768  | A | 290.788  | LOC_Os09g19734.1 |
| DG <sub>HPU</sub> | Os007693_01 | S4 | 1.875  | 0.000  | P | 115.194  | P | 422.647  | P | 258.597  | LOC_Os07g03880.1 |
| DG <sub>HPU</sub> | Os007729_01 | S4 | 0.000  | 1.457  | P | 251.729  | P | 396.187  | P | 144.300  | LOC_Os09g29380.1 |
| DG <sub>HPU</sub> | Os008153_02 | S4 | 1.484  | 0.000  | P | 839.984  | P | 2350.043 | P | 1510.106 | -                |
| DG <sub>HPU</sub> | Os008420_01 | S4 | -1.254 | -1.609 | P | 3205.551 | P | 1344.081 | P | 4099.039 | LOC_Os04g37619.1 |
| DG <sub>HPU</sub> | Os008632_01 | S4 | 0.000  | 1.558  | P | 254.112  | P | 324.102  | P | 110.088  | LOC_Os03g15940.1 |
| DG <sub>HPU</sub> | Os008644_01 | S4 | 0.000  | 1.512  | P | 303.205  | P | 440.349  | P | 154.380  | LOC_Os02g41520.1 |
| DG <sub>HPU</sub> | Os008660_01 | S4 | 0.000  | 1.972  | P | 237.490  | P | 344.815  | P | 87.892   | LOC_Os01g73540.1 |
| DG <sub>HPU</sub> | Os008667_01 | S4 | 0.000  | 1.468  | P | 249.079  | P | 297.616  | P | 107.617  | LOC_Os04g17680.2 |
| DG <sub>HPU</sub> | Os008740_01 | S4 | 0.000  | -1.621 | P | 4155.419 | P | 2858.211 | P | 8793.148 | LOC_Os04g45490.1 |
| DG <sub>HPU</sub> | Os008742_01 | S4 | 1.467  | 0.000  | P | 1128.063 | P | 3119.519 | P | 2324.487 | LOC_Os09g35880.1 |
| DG <sub>HPU</sub> | Os008751_01 | S4 | 1.638  | 0.000  | P | 125.663  | P | 391.168  | P | 405.868  | -                |
| DG <sub>HPU</sub> | Os008761_01 | S4 | -1.906 | 0.000  | P | 1163.906 | P | 310.607  | P | 464.333  | LOC_Os02g32580.1 |
| DG <sub>HPU</sub> | Os008866_01 | S4 | 1.460  | 0.000  | P | 614.694  | P | 1691.394 | P | 1093.241 | LOC_Os10g10180.1 |
| DG <sub>HPU</sub> | Os008938_01 | S4 | 0.000  | 1.539  | P | 369.557  | P | 519.550  | P | 178.776  | LOC_Os12g35320.1 |
| DG <sub>HPU</sub> | Os009085_01 | S4 | 1.592  | 0.000  | P | 122.269  | P | 368.572  | P | 308.400  | LOC_Os10g23220.2 |
| DG <sub>HPU</sub> | Os009089_01 | S4 | 1.511  | 0.000  | P | 190.202  | P | 542.201  | P | 209.617  | LOC_Os04g38940.1 |
| DG <sub>HPU</sub> | Os009179_01 | S4 | 0.000  | 1.578  | P | 178.156  | P | 291.477  | P | 97.639   | LOC_Os04g15690.1 |
| DG <sub>HPU</sub> | Os009211_01 | S4 | 0.000  | 1.471  | P | 179.921  | P | 393.625  | P | 142.024  | LOC_Os10g28120.1 |
| DG <sub>HPU</sub> | Os009286_01 | S4 | 0.000  | 1.460  | P | 480.697  | P | 633.717  | P | 230.378  | LOC_Os02g34860.1 |
| DG <sub>HPU</sub> | Os009373_01 | S4 | 0.000  | 1.430  | P | 173.707  | P | 339.621  | P | 126.009  | LOC_Os07g30170.1 |
| DG <sub>HPU</sub> | Os009577_01 | S4 | 1.996  | 0.000  | P | 467.764  | P | 1865.727 | P | 715.097  | LOC_Os11g16550.1 |

|                   |             |    |        |        |   |          |   |          |   |          |                  |
|-------------------|-------------|----|--------|--------|---|----------|---|----------|---|----------|------------------|
| DG <sub>HPU</sub> | Os009664_01 | S4 | 0.000  | 1.668  | P | 909.320  | P | 1313.017 | P | 413.278  | LOC_Os03g04470.1 |
| DG <sub>HPU</sub> | Os009858_01 | S4 | 0.000  | 1.459  | P | 502.486  | P | 618.530  | P | 224.996  | LOC_Os09g02270.1 |
| DG <sub>HPU</sub> | Os009876_01 | S4 | 0.000  | 1.542  | P | 269.843  | P | 353.986  | P | 121.552  | -                |
| DG <sub>HPU</sub> | Os009986_01 | S4 | -2.393 | 10.000 | P | 2096.008 | P | 399.132  | A | 130.035  | -                |
| DG <sub>HPU</sub> | Os009997_01 | S4 | 0.000  | 1.573  | P | 279.420  | P | 255.428  | P | 85.856   | LOC_Os12g26220.1 |
| DG <sub>HPU</sub> | Os010014_01 | S4 | 0.000  | 1.518  | P | 326.894  | P | 407.152  | P | 142.200  | -                |
| DG <sub>HPU</sub> | Os010034_01 | S4 | 0.000  | 1.433  | P | 1762.902 | P | 1724.652 | P | 638.944  | LOC_Os01g68940.1 |
| DG <sub>HPU</sub> | Os010054_01 | S4 | 0.000  | 1.903  | P | 294.521  | P | 531.702  | P | 142.140  | LOC_Os09g24650.4 |
| DG <sub>HPU</sub> | Os010107_01 | S4 | 0.000  | 1.547  | P | 585.914  | P | 516.468  | P | 176.785  | LOC_Os10g42196.1 |
| DG <sub>HPU</sub> | Os010115_01 | S4 | 0.000  | -1.206 | P | 637.507  | P | 910.304  | P | 2099.777 | LOC_Os09g36040.1 |
| DG <sub>HPU</sub> | Os010117_01 | S4 | 1.973  | 10.000 | P | 1219.485 | P | 4787.088 | A | 3021.859 | LOC_Os05g50840.1 |
| DG <sub>HPU</sub> | Os010118_01 | S4 | 0.000  | 1.441  | P | 401.036  | P | 347.625  | P | 128.035  | -                |
| DG <sub>HPU</sub> | Os010267_01 | S4 | 0.000  | 1.631  | P | 3427.769 | P | 3385.160 | P | 1093.215 | -                |
| DG <sub>HPU</sub> | Os010273_01 | S4 | -1.781 | 0.000  | P | 760.835  | P | 221.360  | P | 217.061  | LOC_Os04g30420.1 |
| DG <sub>HPU</sub> | Os010306_01 | S4 | -1.392 | 0.000  | P | 1358.595 | P | 517.571  | P | 621.025  | LOC_Os06g43810.1 |
| DG <sub>HPU</sub> | Os010373_01 | S4 | 0.000  | 1.490  | P | 503.619  | P | 537.452  | P | 191.325  | -                |
| DG <sub>HPU</sub> | Os010384_01 | S4 | 0.000  | 1.683  | P | 612.244  | P | 750.665  | P | 233.731  | LOC_Os03g47060.1 |
| DG <sub>HPU</sub> | Os010471_01 | S4 | 0.000  | 1.469  | P | 519.850  | P | 516.115  | P | 186.463  | -                |
| DG <sub>HPU</sub> | Os010480_01 | S4 | 0.000  | 1.485  | P | 263.930  | P | 541.309  | P | 193.433  | LOC_Os08g06010.1 |
| DG <sub>HPU</sub> | Os010521_01 | S4 | 0.000  | 1.656  | P | 1618.463 | P | 1590.784 | P | 504.831  | LOC_Os10g37350.1 |
| DG <sub>HPU</sub> | Os010592_01 | S4 | 0.000  | 1.894  | P | 2041.223 | P | 2238.927 | P | 602.569  | LOC_Os04g32310.1 |
| DG <sub>HPU</sub> | Os010845_01 | S4 | 0.000  | 1.586  | P | 207.401  | P | 314.744  | P | 104.807  | -                |
| DG <sub>HPU</sub> | Os010870_01 | S4 | 0.000  | 1.764  | P | 217.095  | P | 492.140  | P | 144.923  | -                |
| DG <sub>HPU</sub> | Os010929_01 | S4 | 0.000  | 1.800  | P | 268.787  | P | 341.274  | P | 98.030   | LOC_Os01g27210.1 |
| DG <sub>HPU</sub> | Os010930_01 | S4 | 1.632  | 10.000 | P | 165.941  | P | 514.226  | A | 19.545   | LOC_Os06g29730.1 |
| DG <sub>HPU</sub> | Os011337_01 | S4 | 1.573  | 10.000 | P | 81.780   | P | 243.269  | A | 47.460   | -                |
| DG <sub>HPU</sub> | Os011442_01 | S4 | -1.385 | 0.000  | P | 553.245  | P | 211.856  | P | 180.051  | LOC_Os01g53280.2 |
| DG <sub>HPU</sub> | Os011506_01 | S4 | 1.540  | 0.000  | P | 97.512   | P | 283.645  | P | 213.771  | -                |
| DG <sub>HPU</sub> | Os011562_01 | S4 | 1.701  | 10.000 | P | 130.462  | P | 424.287  | A | -30.154  | LOC_Os04g08410.1 |
| DG <sub>HPU</sub> | Os011563_01 | S4 | -1.222 | 10.000 | P | 862.368  | P | 369.617  | A | 17.904   | LOC_Os03g13810.1 |
| DG <sub>HPU</sub> | Os011582_01 | S4 | 0.000  | 1.531  | P | 272.352  | P | 423.628  | P | 146.590  | LOC_Os03g13380.1 |

|                   |             |    |        |        |   |          |   |          |   |          |                  |
|-------------------|-------------|----|--------|--------|---|----------|---|----------|---|----------|------------------|
| DG <sub>HPU</sub> | Os011585_01 | S4 | 1.509  | 0.000  | P | 116.178  | P | 330.684  | P | 144.492  | LOC_Os01g61890.1 |
| DG <sub>HPU</sub> | Os011627_01 | S4 | 0.000  | 1.454  | P | 326.524  | P | 339.838  | P | 124.080  | LOC_Os05g38180.1 |
| DG <sub>HPU</sub> | Os011630_01 | S4 | 1.479  | 0.000  | P | 126.631  | P | 352.886  | P | 359.434  | LOC_Os08g39440.2 |
| DG <sub>HPU</sub> | Os011636_01 | S4 | 1.749  | 0.000  | P | 90.514   | P | 304.346  | P | 217.773  | LOC_Os08g36994.1 |
| DG <sub>HPU</sub> | Os011643_01 | S4 | -1.490 | 0.000  | P | 1118.854 | P | 398.284  | P | 531.045  | LOC_Os06g14420.1 |
| DG <sub>HPU</sub> | Os011647_01 | S4 | 0.000  | 1.575  | P | 1331.159 | P | 2374.875 | P | 797.148  | LOC_Os02g51020.1 |
| DG <sub>HPU</sub> | Os011700_01 | S4 | 1.432  | 0.000  | P | 106.792  | P | 288.233  | P | 322.801  | LOC_Os01g40330.1 |
| DG <sub>HPU</sub> | Os011717_01 | S4 | 0.000  | 1.616  | P | 252.519  | P | 350.290  | P | 114.310  | LOC_Os04g47970.1 |
| DG <sub>HPU</sub> | Os011721_01 | S4 | 10.000 | 1.774  | A | 152.169  | P | 433.365  | P | 126.745  | -                |
| DG <sub>HPU</sub> | Os011789_01 | S4 | 1.470  | 0.000  | P | 237.382  | P | 657.401  | P | 498.371  | LOC_Os01g32080.1 |
| DG <sub>HPU</sub> | Os011793_01 | S4 | 0.000  | 1.511  | P | 1619.534 | P | 1731.509 | P | 607.380  | LOC_Os03g20100.1 |
| DG <sub>HPU</sub> | Os011803_01 | S4 | 1.784  | 10.000 | P | 108.538  | P | 373.764  | A | 37.603   | LOC_Os01g37770.1 |
| DG <sub>HPU</sub> | Os011861_01 | S4 | 0.000  | 1.588  | P | 190.738  | P | 386.969  | P | 128.701  | LOC_Os08g39350.1 |
| DG <sub>HPU</sub> | Os011937_01 | S4 | 1.434  | 1.935  | P | 176.105  | P | 475.743  | P | 124.422  | LOC_Os08g44370.1 |
| DG <sub>HPU</sub> | Os011939_01 | S4 | 1.901  | 10.000 | P | 88.870   | P | 332.012  | A | 47.287   | LOC_Os01g61320.2 |
| DG <sub>HPU</sub> | Os011940_01 | S4 | 1.476  | 10.000 | P | 84.343   | P | 234.565  | A | 25.399   | LOC_Os07g08950.2 |
| DG <sub>HPU</sub> | Os011973_01 | S4 | -1.620 | 0.000  | P | 1171.198 | P | 381.004  | P | 344.663  | LOC_Os09g25760.1 |
| DG <sub>HPU</sub> | Os011979_01 | S4 | 0.000  | 1.678  | P | 471.488  | P | 947.023  | P | 295.887  | LOC_Os06g35160.1 |
| DG <sub>HPU</sub> | Os011982_01 | S4 | 1.440  | 0.000  | P | 259.592  | P | 704.266  | P | 490.021  | LOC_Os09g24990.2 |
| DG <sub>HPU</sub> | Os012012_01 | S4 | 1.560  | 0.000  | P | 93.821   | P | 276.599  | P | 230.021  | LOC_Os04g47240.3 |
| DG <sub>HPU</sub> | Os012028_01 | S4 | -1.148 | 0.000  | P | 8662.026 | P | 3909.461 | P | 8501.362 | LOC_Os11g47760.1 |
| DG <sub>HPU</sub> | Os012039_01 | S4 | 0.000  | -1.150 | P | 2341.457 | P | 1580.394 | P | 3506.575 | LOC_Os03g14860.1 |
| DG <sub>HPU</sub> | Os012095_01 | S4 | 1.956  | 10.000 | P | 133.910  | P | 519.650  | A | 24.532   | LOC_Os02g57060.1 |
| DG <sub>HPU</sub> | Os012134_01 | S4 | 0.000  | 1.468  | P | 344.218  | P | 406.801  | P | 147.071  | LOC_Os08g04280.2 |
| DG <sub>HPU</sub> | Os012153_01 | S4 | 1.670  | 0.000  | P | 130.560  | P | 415.547  | P | 213.618  | LOC_Os01g10890.1 |
| DG <sub>HPU</sub> | Os012284_01 | S4 | 1.487  | 0.000  | P | 142.702  | P | 399.889  | P | 327.076  | LOC_Os09g16950.1 |
| DG <sub>HPU</sub> | Os012314_01 | S4 | 0.000  | 1.508  | P | 427.393  | P | 565.786  | P | 198.881  | LOC_Os07g31380.1 |
| DG <sub>HPU</sub> | Os012333_01 | S4 | 1.489  | 10.000 | P | 114.190  | P | 320.485  | A | 35.160   | LOC_Os02g49992.1 |
| DG <sub>HPU</sub> | Os012349_01 | S4 | -1.400 | 0.000  | P | 3707.618 | P | 1405.222 | P | 2225.067 | LOC_Os03g61220.1 |
| DG <sub>HPU</sub> | Os012366_01 | S4 | 0.000  | 1.443  | P | 169.782  | P | 226.510  | P | 83.292   | LOC_Os07g06710.1 |
| DG <sub>HPU</sub> | Os012383_01 | S4 | 0.000  | 1.827  | P | 196.666  | P | 335.813  | P | 94.654   | LOC_Os07g04240.1 |

|                   |             |    |        |        |   |          |   |         |   |          |                  |
|-------------------|-------------|----|--------|--------|---|----------|---|---------|---|----------|------------------|
| DG <sub>HPU</sub> | Os012435_01 | S4 | 1.606  | 0.000  | P | 281.402  | P | 856.895 | P | 940.066  | LOC_Os05g41930.3 |
| DG <sub>HPU</sub> | Os012453_01 | S4 | 2.006  | 0.000  | P | 77.238   | P | 310.296 | P | 133.849  | LOC_Os03g25720.1 |
| DG <sub>HPU</sub> | Os012505_01 | S4 | 0.000  | 1.581  | P | 373.937  | P | 464.058 | P | 155.140  | LOC_Os04g48390.1 |
| DG <sub>HPU</sub> | Os012533_01 | S4 | -1.391 | 0.000  | P | 1563.777 | P | 596.203 | P | 580.368  | LOC_Os06g06290.3 |
| DG <sub>HPU</sub> | Os012556_01 | S4 | 0.000  | 1.725  | P | 283.402  | P | 346.745 | P | 104.863  | LOC_Os02g51500.2 |
| DG <sub>HPU</sub> | Os012583_01 | S4 | 1.650  | 0.000  | P | 190.093  | P | 596.620 | P | 601.100  | LOC_Os01g39960.1 |
| DG <sub>HPU</sub> | Os012695_01 | S4 | 1.741  | 0.000  | P | 135.930  | P | 454.383 | P | 289.506  | LOC_Os02g43519.1 |
| DG <sub>HPU</sub> | Os012742_01 | S4 | 0.000  | 1.550  | P | 109.334  | P | 267.857 | P | 91.452   | LOC_Os07g16130.1 |
| DG <sub>HPU</sub> | Os012762_01 | S4 | 1.606  | 10.000 | P | 116.087  | P | 353.346 | A | -11.731  | LOC_Os09g39230.1 |
| DG <sub>HPU</sub> | Os012828_01 | S4 | 0.000  | 1.417  | P | 178.354  | P | 306.934 | P | 114.947  | LOC_Os02g41470.3 |
| DG <sub>HPU</sub> | Os012865_01 | S4 | 0.000  | 1.573  | P | 463.035  | P | 516.768 | P | 173.671  | LOC_Os11g04030.1 |
| DG <sub>HPU</sub> | Os012890_01 | S4 | -1.992 | 0.000  | P | 1585.490 | P | 398.593 | P | 486.381  | LOC_Os01g63620.1 |
| DG <sub>HPU</sub> | Os012904_01 | S4 | 0.000  | 1.402  | P | 177.480  | P | 362.216 | P | 137.075  | LOC_Os12g02390.1 |
| DG <sub>HPU</sub> | Os012910_01 | S4 | 0.000  | -1.624 | P | 429.694  | P | 402.015 | P | 1239.126 | LOC_Os12g38170.1 |
| DG <sub>HPU</sub> | Os012922_01 | S4 | 0.000  | 1.439  | P | 177.465  | P | 439.307 | P | 162.078  | LOC_Os02g47410.2 |
| DG <sub>HPU</sub> | Os012940_01 | S4 | 1.447  | 0.000  | P | 112.819  | P | 307.495 | P | 153.704  | LOC_Os03g42820.2 |
| DG <sub>HPU</sub> | Os012943_01 | S4 | 1.627  | 10.000 | P | 168.161  | P | 519.411 | A | 62.058   | LOC_Os04g51809.1 |
| DG <sub>HPU</sub> | Os012955_01 | S4 | -1.174 | 10.000 | P | 444.458  | P | 196.958 | A | 38.450   | LOC_Os12g14440.1 |
| DG <sub>HPU</sub> | Os012985_01 | S4 | 1.574  | 10.000 | P | 112.851  | P | 335.944 | A | -5.786   | LOC_Os07g43720.1 |
| DG <sub>HPU</sub> | Os013038_01 | S4 | 0.000  | 1.523  | P | 601.461  | P | 660.578 | P | 229.826  | LOC_Os02g53180.2 |
| DG <sub>HPU</sub> | Os013059_01 | S4 | 0.000  | -1.843 | P | 758.147  | P | 394.541 | P | 1415.569 | LOC_Os03g06630.1 |
| DG <sub>HPU</sub> | Os013065_01 | S4 | 1.907  | 10.000 | P | 74.641   | P | 279.901 | A | 9.658    | LOC_Os03g02850.2 |
| DG <sub>HPU</sub> | Os013118_01 | S4 | 1.441  | 10.000 | P | 113.621  | P | 308.384 | A | 23.738   | LOC_Os03g22420.1 |
| DG <sub>HPU</sub> | Os013140_01 | S4 | 1.957  | 10.000 | P | 70.823   | P | 274.974 | A | 59.465   | LOC_Os07g28940.1 |
| DG <sub>HPU</sub> | Os013160_01 | S4 | 1.865  | 0.000  | P | 92.576   | P | 337.155 | P | 148.598  | LOC_Os09g32450.1 |
| DG <sub>HPU</sub> | Os013181_01 | S4 | 0.000  | 1.526  | P | 117.982  | P | 269.029 | P | 93.405   | LOC_Os04g52690.3 |
| DG <sub>HPU</sub> | Os013188_01 | S4 | 1.508  | 0.000  | P | 177.308  | P | 504.288 | P | 310.841  | LOC_Os10g25570.2 |
| DG <sub>HPU</sub> | Os013257_01 | S4 | 1.799  | 0.000  | P | 61.713   | P | 214.682 | P | 95.899   | LOC_Os04g36058.2 |
| DG <sub>HPU</sub> | Os013275_01 | S4 | 1.578  | 10.000 | P | 105.206  | P | 314.034 | A | 37.420   | LOC_Os08g01320.1 |
| DG <sub>HPU</sub> | Os013306_01 | S4 | 2.266  | 10.000 | P | 84.712   | P | 407.539 | A | 50.177   | -                |
| DG <sub>HPU</sub> | Os013328_01 | S4 | 1.511  | 10.000 | P | 107.347  | P | 305.931 | A | 44.898   | LOC_Os04g58390.1 |

|                   |             |    |        |        |   |          |   |          |   |          |                  |
|-------------------|-------------|----|--------|--------|---|----------|---|----------|---|----------|------------------|
| DG <sub>HPU</sub> | Os013375_01 | S4 | 1.621  | 10.000 | P | 115.799  | P | 356.202  | A | 26.984   | LOC_Os04g32110.1 |
| DG <sub>HPU</sub> | Os013387_01 | S4 | 0.000  | 1.496  | P | 368.349  | P | 455.148  | P | 161.422  | -                |
| DG <sub>HPU</sub> | Os013415_01 | S4 | 1.894  | 0.000  | P | 114.837  | P | 426.802  | P | 172.218  | LOC_Os01g12320.1 |
| DG <sub>HPU</sub> | Os013432_01 | S4 | 0.000  | -1.186 | P | 1028.047 | P | 513.787  | P | 1168.713 | -                |
| DG <sub>HPU</sub> | Os013473_01 | S4 | 0.000  | 1.459  | P | 185.088  | P | 252.812  | P | 91.984   | LOC_Os02g48340.3 |
| DG <sub>HPU</sub> | Os013490_01 | S4 | 0.000  | 1.403  | P | 104.880  | P | 264.319  | P | 99.977   | LOC_Os10g05020.1 |
| DG <sub>HPU</sub> | Os013539_01 | S4 | 1.722  | 10.000 | P | 65.430   | P | 215.813  | A | 46.469   | LOC_Os05g46890.1 |
| DG <sub>HPU</sub> | Os013562_01 | S4 | 0.000  | 1.789  | P | 222.729  | P | 316.945  | P | 91.722   | LOC_Os12g06650.1 |
| DG <sub>HPU</sub> | Os013653_01 | S4 | 1.956  | 0.000  | P | 155.898  | P | 605.051  | P | 481.622  | LOC_Os09g34140.2 |
| DG <sub>HPU</sub> | Os013659_01 | S4 | -2.260 | -1.158 | P | 3433.781 | P | 716.640  | P | 1599.216 | LOC_Os03g60080.1 |
| DG <sub>HPU</sub> | Os013665_01 | S4 | 1.744  | 0.000  | P | 83.830   | P | 280.861  | P | 118.724  | LOC_Os06g43560.1 |
| DG <sub>HPU</sub> | Os013679_01 | S4 | 10.000 | 1.710  | A | 151.796  | P | 478.736  | P | 146.316  | LOC_Os07g39560.3 |
| DG <sub>HPU</sub> | Os013684_01 | S4 | 1.447  | 0.000  | P | 142.971  | P | 389.691  | P | 394.546  | -                |
| DG <sub>HPU</sub> | Os013728_01 | S4 | 0.000  | 1.645  | P | 402.548  | P | 490.894  | P | 156.930  | LOC_Os01g07250.1 |
| DG <sub>HPU</sub> | Os013730_01 | S4 | 1.515  | 0.000  | P | 77.798   | P | 222.397  | P | 146.891  | LOC_Os03g08370.1 |
| DG <sub>HPU</sub> | Os013799_01 | S4 | 1.910  | 0.000  | P | 69.183   | P | 259.931  | P | 114.094  | LOC_Os08g39694.2 |
| DG <sub>HPU</sub> | Os013819_01 | S4 | 1.609  | 10.000 | P | 95.911   | P | 292.617  | A | 36.882   | LOC_Os01g37050.1 |
| DG <sub>HPU</sub> | Os013853_01 | S4 | 1.732  | 10.000 | P | 81.002   | P | 269.135  | A | 40.034   | LOC_Os02g10510.1 |
| DG <sub>HPU</sub> | Os013889_01 | S4 | 1.827  | 0.000  | P | 242.163  | P | 859.111  | P | 694.658  | LOC_Os04g38750.1 |
| DG <sub>HPU</sub> | Os013911_01 | S4 | 0.000  | 1.662  | P | 167.616  | P | 308.539  | P | 97.481   | LOC_Os07g34830.1 |
| DG <sub>HPU</sub> | Os013918_01 | S4 | 0.000  | -1.178 | P | 517.418  | P | 288.416  | P | 652.558  | LOC_Os09g29070.1 |
| DG <sub>HPU</sub> | Os013945_01 | S4 | -1.591 | 0.000  | P | 1820.218 | P | 604.145  | P | 601.427  | LOC_Os03g38950.1 |
| DG <sub>HPU</sub> | Os013985_01 | S4 | 1.562  | 10.000 | P | 96.597   | P | 285.295  | A | -20.478  | LOC_Os04g32330.1 |
| DG <sub>HPU</sub> | Os013991_01 | S4 | 0.000  | 1.567  | P | 670.246  | P | 581.812  | P | 196.358  | LOC_Os02g57290.4 |
| DG <sub>HPU</sub> | Os014115_01 | S4 | 1.590  | 0.000  | P | 117.077  | P | 352.386  | P | 292.500  | LOC_Os10g37860.1 |
| DG <sub>HPU</sub> | Os014132_01 | S4 | 2.056  | 0.000  | P | 67.965   | P | 282.672  | P | 216.491  | LOC_Os06g14550.1 |
| DG <sub>HPU</sub> | Os014147_01 | S4 | 0.000  | 1.611  | P | 869.719  | P | 928.815  | P | 304.083  | LOC_Os02g54990.2 |
| DG <sub>HPU</sub> | Os014249_01 | S4 | 0.000  | -1.497 | P | 1705.887 | P | 1061.043 | P | 2994.888 | LOC_Os06g28194.1 |
| DG <sub>HPU</sub> | Os014252_01 | S4 | 0.000  | 1.486  | P | 445.429  | P | 717.919  | P | 256.258  | LOC_Os02g22260.1 |
| DG <sub>HPU</sub> | Os014412_01 | S4 | 10.000 | 2.238  | A | 166.035  | P | 611.126  | P | 129.537  | LOC_Os04g35700.1 |
| DG <sub>HPU</sub> | Os014548_01 | S4 | 2.023  | 10.000 | P | 84.945   | P | 345.164  | A | 25.581   | LOC_Os05g49060.1 |

|                   |             |    |        |        |   |          |   |          |   |          |                  |
|-------------------|-------------|----|--------|--------|---|----------|---|----------|---|----------|------------------|
| DG <sub>HPU</sub> | Os014656_01 | S4 | 0.000  | 1.413  | P | 390.672  | P | 307.702  | P | 115.564  | LOC_Os01g40820.1 |
| DG <sub>HPU</sub> | Os014712_01 | S4 | 1.737  | 0.000  | P | 101.826  | P | 339.373  | P | 258.974  | LOC_Os04g41460.1 |
| DG <sub>HPU</sub> | Os014777_01 | S4 | -1.150 | 0.000  | P | 350.384  | P | 157.925  | P | 271.231  | LOC_Os03g02750.1 |
| DG <sub>HPU</sub> | Os014969_01 | S4 | -1.067 | 0.000  | P | 340.126  | P | 162.388  | P | 191.442  | LOC_Os01g46570.1 |
| DG <sub>HPU</sub> | Os015092_01 | S4 | -1.121 | 0.000  | P | 347.027  | P | 159.520  | P | 197.216  | LOC_Os09g22000.1 |
| DG <sub>HPU</sub> | Os015128_01 | S4 | -1.523 | -1.553 | P | 400.136  | P | 139.208  | P | 408.442  | LOC_Os02g04210.1 |
| DG <sub>HPU</sub> | Os015272_01 | S4 | -1.362 | 0.000  | P | 405.315  | P | 157.662  | P | 281.589  | LOC_Os07g02780.1 |
| DG <sub>HPU</sub> | Os015282_01 | S4 | -1.175 | 0.000  | P | 445.441  | P | 197.336  | P | 200.243  | LOC_Os05g14180.1 |
| DG <sub>HPU</sub> | Os015375_01 | S4 | 0.000  | -1.659 | P | 387.389  | P | 217.765  | P | 687.656  | LOC_Os08g37390.1 |
| DG <sub>HPU</sub> | Os015556_01 | S4 | -1.130 | -1.280 | P | 334.223  | P | 152.705  | P | 370.816  | LOC_Os03g41060.1 |
| DG <sub>HPU</sub> | Os015684_01 | S4 | -1.100 | 0.000  | P | 830.777  | P | 387.687  | P | 244.118  | -                |
| DG <sub>HPU</sub> | Os015843_01 | S4 | -1.517 | 0.000  | P | 418.267  | P | 146.138  | P | 214.304  | LOC_Os03g08310.1 |
| DG <sub>HPU</sub> | Os015934_01 | S4 | -1.432 | 0.000  | P | 2428.918 | P | 900.408  | P | 1508.315 | LOC_Os04g54630.1 |
| DG <sub>HPU</sub> | Os015981_01 | S4 | 0.000  | 1.638  | P | 329.090  | P | 382.708  | P | 122.980  | LOC_Os04g36050.1 |
| DG <sub>HPU</sub> | Os016112_01 | S4 | -1.100 | 0.000  | P | 435.703  | P | 203.224  | P | 295.330  | LOC_Os04g38720.1 |
| DG <sub>HPU</sub> | Os016162_01 | S4 | 0.000  | 1.527  | P | 351.876  | P | 362.419  | P | 125.740  | LOC_Os11g38800.2 |
| DG <sub>HPU</sub> | Os016183_01 | S4 | -1.037 | 0.000  | P | 386.902  | P | 188.556  | P | 259.947  | -                |
| DG <sub>HPU</sub> | Os016221_01 | S4 | -1.199 | 0.000  | P | 444.684  | P | 193.759  | P | 250.765  | LOC_Os05g02060.1 |
| DG <sub>HPU</sub> | Os016477_01 | S4 | -1.087 | 0.000  | P | 430.653  | P | 202.723  | P | 260.788  | LOC_Os04g10160.1 |
| DG <sub>HPU</sub> | Os016486_01 | S4 | 0.000  | 1.452  | P | 286.979  | P | 335.665  | P | 122.663  | LOC_Os05g07090.1 |
| DG <sub>HPU</sub> | Os016859_01 | S4 | -1.728 | 0.000  | P | 1032.905 | P | 311.803  | P | 438.177  | LOC_Os05g37520.1 |
| DG <sub>HPU</sub> | Os016868_01 | S4 | -1.643 | 0.000  | P | 458.943  | P | 146.969  | P | 196.566  | LOC_Os01g51980.1 |
| DG <sub>HPU</sub> | Os016869_01 | S4 | -1.291 | 0.000  | P | 6824.568 | P | 2789.788 | P | 3208.289 | LOC_Os01g08700.6 |
| DG <sub>HPU</sub> | Os016919_01 | S4 | 0.000  | 1.731  | P | 871.153  | P | 1434.147 | P | 431.981  | LOC_Os02g01590.1 |
| DG <sub>HPU</sub> | Os016931_01 | S4 | 0.000  | 1.463  | P | 331.039  | P | 341.925  | P | 123.987  | LOC_Os11g11100.1 |
| DG <sub>HPU</sub> | Os017149_01 | S4 | 0.000  | -1.256 | P | 1275.499 | P | 1646.397 | P | 3931.311 | LOC_Os03g01030.1 |
| DG <sub>HPU</sub> | Os017243_01 | S4 | -1.331 | 0.000  | P | 355.602  | P | 141.380  | P | 193.424  | LOC_Os03g49380.1 |
| DG <sub>HPU</sub> | Os017440_01 | S4 | -1.050 | 0.000  | P | 438.055  | P | 211.628  | P | 230.772  | LOC_Os10g01134.1 |
| DG <sub>HPU</sub> | Os017728_01 | S4 | -1.173 | 0.000  | P | 366.341  | P | 162.478  | P | 189.676  | LOC_Os03g63730.1 |
| DG <sub>HPU</sub> | Os017734_01 | S4 | -1.066 | 0.000  | P | 337.881  | P | 161.350  | P | 202.982  | LOC_Os03g02720.1 |
| DG <sub>HPU</sub> | Os017851_01 | S4 | -1.398 | -1.280 | P | 4084.627 | P | 1550.383 | P | 3763.643 | LOC_Os06g22960.1 |



|                   |             |    |        |        |   |          |   |          |   |          |                  |
|-------------------|-------------|----|--------|--------|---|----------|---|----------|---|----------|------------------|
| DG <sub>HPU</sub> | Os017861_01 | S4 | -1.140 | 0.000  | P | 469.838  | P | 213.225  | P | 187.218  | LOC_Os01g67030.1 |
| DG <sub>HPU</sub> | Os017943_01 | S4 | -1.974 | 0.000  | P | 5174.799 | P | 1316.784 | P | 1641.251 | LOC_Os07g12340.1 |
| DG <sub>HPU</sub> | Os018043_01 | S4 | -1.384 | 0.000  | P | 607.031  | P | 232.536  | P | 305.749  | LOC_Os02g30840.1 |
| DG <sub>HPU</sub> | Os018061_01 | S4 | -1.157 | 0.000  | P | 442.731  | P | 198.579  | P | 189.746  | LOC_Os03g15120.1 |
| DG <sub>HPU</sub> | Os018086_01 | S4 | -1.347 | 0.000  | P | 1244.132 | P | 489.154  | P | 388.490  | -                |
| DG <sub>HPU</sub> | Os018214_01 | S4 | 0.000  | 1.607  | P | 516.618  | P | 467.041  | P | 153.299  | LOC_Os08g12750.2 |
| DG <sub>HPU</sub> | Os018265_01 | S4 | -1.129 | 0.000  | P | 1089.470 | P | 498.240  | P | 403.221  | LOC_Os11g05260.1 |
| DG <sub>HPU</sub> | Os018329_01 | S4 | -1.718 | 0.000  | P | 4979.525 | P | 1513.425 | P | 3247.300 | LOC_Os03g19720.1 |
| DG <sub>HPU</sub> | Os018334_01 | S4 | -1.098 | -1.883 | P | 3780.974 | P | 1766.311 | P | 6516.096 | LOC_Os03g50870.1 |
| DG <sub>HPU</sub> | Os018361_01 | S4 | -1.377 | 0.000  | P | 584.048  | P | 224.840  | P | 171.287  | LOC_Os05g39930.1 |
| DG <sub>HPU</sub> | Os018411_01 | S4 | 0.000  | 1.493  | P | 138.789  | P | 198.268  | P | 70.462   | LOC_Os11g43510.1 |
| DG <sub>HPU</sub> | Os018535_01 | S4 | 0.000  | -1.673 | P | 1565.398 | P | 1294.047 | P | 4127.347 | LOC_Os12g38180.1 |
| DG <sub>HPU</sub> | Os018550_01 | S4 | -1.108 | 0.000  | P | 962.182  | P | 446.417  | P | 306.862  | LOC_Os06g08740.1 |
| DG <sub>HPU</sub> | Os018818_01 | S4 | -1.092 | 0.000  | P | 897.818  | P | 421.055  | P | 390.993  | -                |
| DG <sub>HPU</sub> | Os018995_01 | S4 | -1.216 | 0.000  | P | 413.716  | P | 178.155  | P | 119.684  | LOC_Os03g15710.1 |
| DG <sub>HPU</sub> | Os019078_01 | S4 | 0.000  | -1.269 | P | 297.168  | P | 156.434  | P | 377.099  | -                |
| DG <sub>HPU</sub> | Os019092_01 | S4 | 0.000  | 1.417  | P | 137.461  | P | 221.055  | P | 82.782   | LOC_Os01g74530.2 |
| DG <sub>HPU</sub> | Os019192_01 | S4 | 0.000  | 1.454  | P | 171.600  | P | 274.577  | P | 100.231  | LOC_Os05g07650.1 |
| DG <sub>HPU</sub> | Os019223_01 | S4 | 0.000  | -1.235 | P | 826.232  | P | 580.677  | P | 1366.588 | LOC_Os11g38650.1 |
| DG <sub>HPU</sub> | Os019298_01 | S4 | 0.000  | 1.504  | P | 686.474  | P | 656.151  | P | 231.374  | LOC_Os04g35570.1 |
| DG <sub>HPU</sub> | Os019413_01 | S4 | 0.000  | -1.461 | P | 693.819  | P | 808.471  | P | 2225.290 | LOC_Os07g49110.1 |
| DG <sub>HPU</sub> | Os019688_01 | S4 | 0.000  | -1.174 | P | 1010.166 | P | 1122.853 | P | 2534.019 | LOC_Os04g02820.2 |
| DG <sub>HPU</sub> | Os019923_01 | S4 | -1.312 | 0.000  | P | 386.814  | P | 155.743  | P | 292.445  | LOC_Os01g51890.1 |
| DG <sub>HPU</sub> | Os020041_01 | S4 | 0.000  | 1.421  | P | 210.486  | P | 299.230  | P | 111.774  | LOC_Os01g64010.2 |
| DG <sub>HPU</sub> | Os020206_01 | S4 | 0.000  | 1.483  | P | 242.880  | P | 298.670  | P | 106.828  | LOC_Os03g63500.1 |
| DG <sub>HPU</sub> | Os020291_01 | S4 | 0.000  | -1.405 | P | 815.152  | P | 746.315  | P | 1975.693 | LOC_Os09g24640.1 |
| DG <sub>HPU</sub> | Os020301_01 | S4 | 0.000  | 1.445  | P | 306.641  | P | 326.159  | P | 119.774  | LOC_Os06g40370.1 |
| DG <sub>HPU</sub> | Os020308_01 | S4 | 1.985  | 0.000  | P | 143.853  | P | 569.388  | P | 331.633  | LOC_Os02g48840.1 |
| DG <sub>HPU</sub> | Os020363_01 | S4 | 0.000  | -1.177 | P | 854.799  | P | 436.029  | P | 985.577  | LOC_Os02g21260.1 |
| DG <sub>HPU</sub> | Os020383_01 | S4 | 1.522  | 0.000  | P | 131.478  | P | 377.686  | P | 204.794  | LOC_Os02g50320.1 |
| DG <sub>HPU</sub> | Os020392_01 | S4 | 0.000  | 1.585  | P | 2922.037 | P | 6328.376 | P | 2108.836 | LOC_Os03g15050.2 |

|                   |             |    |        |        |   |          |   |          |   |          |                  |
|-------------------|-------------|----|--------|--------|---|----------|---|----------|---|----------|------------------|
| DG <sub>HPU</sub> | Os020398_01 | S4 | 1.577  | 0.000  | P | 375.939  | P | 1121.695 | P | 1233.734 | LOC_Os03g54000.1 |
| DG <sub>HPU</sub> | Os020411_01 | S4 | -1.379 | -1.884 | P | 3326.786 | P | 1279.020 | P | 4719.485 | LOC_Os08g39140.1 |
| DG <sub>HPU</sub> | Os020479_01 | S4 | -1.090 | 0.000  | P | 510.458  | P | 239.727  | P | 178.450  | LOC_Os03g03280.1 |
| DG <sub>HPU</sub> | Os020525_01 | S4 | -1.049 | 0.000  | P | 346.586  | P | 167.537  | P | 203.411  | -                |
| DG <sub>HPU</sub> | Os020529_01 | S4 | -1.273 | 0.000  | P | 877.483  | P | 363.203  | P | 641.605  | LOC_Os01g57420.1 |
| DG <sub>HPU</sub> | Os020541_01 | S4 | 0.000  | -1.279 | P | 331.133  | P | 200.233  | P | 486.031  | LOC_Os01g37842.1 |
| DG <sub>HPU</sub> | Os020547_01 | S4 | 0.000  | -1.308 | P | 308.704  | P | 256.775  | P | 635.973  | LOC_Os03g10850.2 |
| DG <sub>HPU</sub> | Os020623_01 | S4 | -1.866 | -1.799 | P | 4435.230 | P | 1216.686 | P | 4233.845 | LOC_Os07g49400.2 |
| DG <sub>HPU</sub> | Os020828_01 | S4 | -1.063 | 0.000  | P | 375.785  | P | 179.882  | P | 255.453  | LOC_Os07g48280.2 |
| DG <sub>HPU</sub> | Os020972_01 | S4 | 0.000  | 1.513  | P | 294.069  | P | 342.281  | P | 119.900  | LOC_Os03g60150.2 |
| DG <sub>HPU</sub> | Os021076_01 | S4 | 0.000  | 1.680  | P | 212.326  | P | 250.779  | P | 78.248   | LOC_Os01g03110.1 |
| DG <sub>HPU</sub> | Os021148_01 | S4 | 0.000  | 1.422  | P | 205.678  | P | 225.703  | P | 84.259   | LOC_Os03g55270.1 |
| DG <sub>HPU</sub> | Os021391_01 | S4 | 0.000  | -1.336 | P | 1953.787 | P | 1706.069 | P | 4307.824 | LOC_Os03g12670.2 |
| DG <sub>HPU</sub> | Os021429_01 | S4 | 1.680  | 0.000  | P | 119.355  | P | 382.515  | P | 255.040  | LOC_Os12g20390.4 |
| DG <sub>HPU</sub> | Os021575_01 | S4 | 0.000  | 1.501  | P | 516.195  | P | 478.288  | P | 168.944  | LOC_Os02g28820.1 |
| DG <sub>HPU</sub> | Os021682_01 | S4 | -1.070 | 0.000  | P | 332.830  | P | 158.536  | P | 179.465  | LOC_Os02g10380.1 |
| DG <sub>HPU</sub> | Os021893_01 | S4 | -1.684 | 0.000  | P | 862.866  | P | 268.502  | P | 581.146  | LOC_Os09g35030.1 |
| DG <sub>HPU</sub> | Os021916_01 | S4 | 1.452  | 0.000  | P | 475.001  | P | 1299.834 | P | 510.025  | LOC_Os03g56950.4 |
| DG <sub>HPU</sub> | Os022009_01 | S4 | -1.045 | 0.000  | P | 411.163  | P | 199.274  | P | 137.103  | LOC_Os09g35630.1 |
| DG <sub>HPU</sub> | Os022142_01 | S4 | -1.831 | 0.000  | P | 1887.977 | P | 530.528  | P | 717.915  | LOC_Os09g31200.1 |
| DG <sub>HPU</sub> | Os022247_01 | S4 | -1.049 | 0.000  | P | 800.753  | P | 387.022  | P | 456.444  | LOC_Os03g26910.1 |
| DG <sub>HPU</sub> | Os022291_01 | S4 | -1.708 | -1.170 | P | 2410.155 | P | 737.822  | P | 1660.655 | LOC_Os03g16880.1 |
| DG <sub>HPU</sub> | Os022390_01 | S4 | 1.580  | 0.000  | P | 137.088  | P | 409.938  | P | 352.182  | -                |
| DG <sub>HPU</sub> | Os022597_01 | S4 | 1.757  | 0.000  | P | 551.597  | P | 1864.589 | P | 936.143  | LOC_Os11g17930.1 |
| DG <sub>HPU</sub> | Os023424_01 | S4 | 1.585  | 10.000 | P | 100.082  | P | 300.263  | A | 45.440   | -                |
| DG <sub>HPU</sub> | Os023709_01 | S4 | -1.062 | 0.000  | P | 469.030  | P | 224.719  | P | 232.337  | -                |
| DG <sub>HPU</sub> | Os023935_01 | S4 | 0.000  | 1.538  | P | 1299.618 | P | 1101.919 | P | 379.552  | -                |
| DG <sub>HPU</sub> | Os023944_01 | S4 | 1.705  | 0.000  | P | 103.274  | P | 336.635  | P | 165.323  | LOC_Os09g28650.1 |
| DG <sub>HPU</sub> | Os023968_01 | S4 | 1.631  | 1.727  | P | 122.568  | P | 379.678  | P | 114.725  | LOC_Os06g34730.1 |
| DG <sub>HPU</sub> | Os023998_01 | S4 | 0.000  | 1.435  | P | 948.499  | P | 979.145  | P | 362.185  | LOC_Os08g42570.1 |
| DG <sub>HPU</sub> | Os024099_01 | S4 | -1.286 | 0.000  | P | 479.203  | P | 196.536  | P | 307.271  | LOC_Os01g51690.1 |

|                   |             |    |        |        |   |          |   |          |   |          |                  |
|-------------------|-------------|----|--------|--------|---|----------|---|----------|---|----------|------------------|
| DG <sub>HPU</sub> | Os024213_01 | S4 | 0.000  | 1.589  | P | 803.433  | P | 806.136  | P | 267.891  | LOC_Os12g36930.1 |
| DG <sub>HPU</sub> | Os024340_01 | S4 | 0.000  | -1.300 | P | 541.938  | P | 560.600  | P | 1380.489 | LOC_Os02g48380.1 |
| DG <sub>HPU</sub> | Os024561_01 | S4 | 0.000  | -2.181 | P | 952.276  | P | 497.943  | P | 2257.630 | LOC_Os04g01740.1 |
| DG <sub>HPU</sub> | Os024737_01 | S4 | 0.000  | 1.642  | P | 220.659  | P | 374.177  | P | 119.928  | LOC_Os01g01660.1 |
| DG <sub>HPU</sub> | Os024767_01 | S4 | 1.622  | 0.000  | P | 329.992  | P | 1015.879 | P | 655.361  | LOC_Os03g59360.1 |
| DG <sub>HPU</sub> | Os024882_01 | S4 | -1.104 | 0.000  | P | 786.453  | P | 365.935  | P | 410.671  | LOC_Os09g31120.1 |
| DG <sub>HPU</sub> | Os025022_01 | S4 | 1.554  | 0.000  | P | 78.598   | P | 230.865  | P | 175.788  | LOC_Os04g41700.4 |
| DG <sub>HPU</sub> | Os025567_01 | S4 | 0.000  | 1.424  | P | 361.001  | P | 591.951  | P | 220.665  | LOC_Os11g28270.3 |
| DG <sub>HPU</sub> | Os025691_01 | S4 | 0.000  | 1.430  | P | 215.576  | P | 367.939  | P | 136.540  | LOC_Os11g38790.2 |
| DG <sub>HPU</sub> | Os025757_01 | S4 | 1.593  | 0.000  | P | 101.769  | P | 307.077  | P | 299.671  | LOC_Os05g33390.1 |
| DG <sub>HPU</sub> | Os025872_01 | S4 | 0.000  | 1.548  | P | 873.453  | P | 1055.401 | P | 360.828  | LOC_Os11g01450.1 |
| DG <sub>HPU</sub> | Os026289_01 | S4 | 0.000  | -1.172 | P | 175.166  | P | 168.843  | P | 380.322  | -                |
| DG <sub>HPU</sub> | Os026463_01 | S4 | 0.000  | 1.725  | P | 230.567  | P | 282.160  | P | 85.346   | LOC_Os03g06000.1 |
| DG <sub>HPU</sub> | Os026917_01 | S4 | -2.279 | 0.000  | P | 8111.820 | P | 1671.559 | P | 2616.135 | LOC_Os04g52250.1 |
| DG <sub>HPU</sub> | Os027884_01 | S4 | 0.000  | 1.416  | P | 516.374  | P | 524.637  | P | 196.557  | LOC_Os04g49600.1 |
| DG <sub>HPU</sub> | Os028023_01 | S4 | 0.000  | -1.150 | P | 390.255  | P | 338.238  | P | 750.553  | LOC_Os01g04630.1 |
| DG <sub>HPU</sub> | Os028605_01 | S4 | -2.693 | 0.000  | P | 1847.279 | P | 285.586  | P | 531.154  | LOC_Os02g06380.1 |
| DG <sub>HPU</sub> | Os028650_01 | S4 | 0.000  | 1.574  | P | 175.833  | P | 358.965  | P | 120.572  | LOC_Os01g10970.1 |
| DG <sub>HPU</sub> | Os029341_01 | S4 | 0.000  | -1.723 | P | 170.720  | P | 154.771  | P | 511.076  | LOC_Os01g68780.1 |
| DG <sub>HPU</sub> | Os029818_01 | S4 | 0.000  | -1.312 | P | 280.163  | P | 175.631  | P | 436.010  | LOC_Os01g45940.1 |
| DG <sub>HPU</sub> | Os029823_01 | S4 | 0.000  | -1.260 | P | 974.871  | P | 925.464  | P | 2215.951 | -                |
| DG <sub>HPU</sub> | Os029861_01 | S4 | 0.000  | -1.219 | P | 154.481  | P | 189.592  | P | 441.345  | LOC_Os04g11190.1 |
| DG <sub>HPU</sub> | Os029917_01 | S4 | 0.000  | -1.223 | P | 237.743  | P | 243.813  | P | 569.239  | LOC_Os08g37590.1 |
| DG <sub>HPU</sub> | Os029919_01 | S4 | 0.000  | -1.377 | P | 187.069  | P | 218.429  | P | 567.399  | LOC_Os11g41630.1 |
| DG <sub>HPU</sub> | Os029941_01 | S4 | 0.000  | -1.560 | P | 296.143  | P | 173.409  | P | 511.251  | LOC_Os09g11030.1 |
| DG <sub>HPU</sub> | Os029948_01 | S4 | 0.000  | -1.233 | P | 238.867  | P | 327.908  | P | 770.697  | LOC_Os10g08610.1 |
| DG <sub>HPU</sub> | Os029961_01 | S4 | 0.000  | -1.815 | P | 226.949  | P | 171.516  | P | 603.354  | LOC_Os01g62280.1 |
| DG <sub>HPU</sub> | Os030080_01 | S4 | -1.189 | 0.000  | P | 752.900  | P | 330.269  | P | 554.948  | LOC_Os03g45450.1 |
| DG <sub>HPU</sub> | Os030571_01 | S4 | 0.000  | -1.799 | P | 245.808  | P | 199.757  | P | 695.318  | LOC_Os08g43880.1 |
| DG <sub>HPU</sub> | Os030593_01 | S4 | 0.000  | -1.189 | P | 186.616  | P | 207.294  | P | 472.521  | LOC_Os03g50760.1 |
| DG <sub>HPU</sub> | Os030714_01 | S4 | 0.000  | -1.544 | P | 158.475  | P | 156.536  | P | 456.538  | LOC_Os01g43510.1 |

|                   |             |    |        |        |   |          |   |           |   |           |                  |
|-------------------|-------------|----|--------|--------|---|----------|---|-----------|---|-----------|------------------|
| DG <sub>HPU</sub> | Os030892_01 | S4 | 0.000  | -1.152 | P | 226.179  | P | 200.046   | P | 444.410   | LOC_Os02g41930.1 |
| DG <sub>HPU</sub> | Os030944_01 | S4 | 0.000  | 1.586  | P | 527.936  | P | 580.215   | P | 193.230   | LOC_Os02g19790.1 |
| DG <sub>HPU</sub> | Os031060_01 | S4 | 0.000  | 1.445  | P | 150.824  | P | 259.595   | P | 95.332    | -                |
| DG <sub>HPU</sub> | Os031100_01 | S4 | 0.000  | -1.490 | P | 167.047  | P | 159.558   | P | 448.201   | LOC_Os11g31140.1 |
| DG <sub>HPU</sub> | Os031550_01 | S4 | 0.000  | -1.373 | P | 359.340  | P | 360.715   | P | 934.493   | LOC_Os04g10924.1 |
| DG <sub>HPU</sub> | Os031754_01 | S4 | 0.000  | 1.452  | P | 235.379  | P | 263.663   | P | 96.400    | LOC_Os08g31070.1 |
| DG <sub>HPU</sub> | Os031779_01 | S4 | -1.098 | 0.000  | P | 384.134  | P | 179.450   | P | 128.784   | -                |
| DG <sub>HPU</sub> | Os032845_01 | S4 | 0.000  | -1.218 | P | 539.441  | P | 407.087   | P | 947.279   | LOC_Os02g56260.1 |
| DG <sub>HPU</sub> | Os032846_01 | S4 | 0.000  | -1.943 | P | 270.014  | P | 234.601   | P | 902.263   | LOC_Os08g33600.1 |
| DG <sub>HPU</sub> | Os032854_01 | S4 | 0.000  | -1.276 | P | 290.027  | P | 227.247   | P | 550.432   | LOC_Os09g25080.1 |
| DG <sub>HPU</sub> | Os032876_01 | S4 | 0.000  | -1.165 | P | 198.445  | P | 197.213   | P | 442.203   | LOC_Os12g32160.1 |
| DG <sub>HPU</sub> | Os032927_01 | S4 | 0.000  | 1.462  | P | 286.447  | P | 326.324   | P | 118.443   | LOC_Os01g03380.1 |
| DG <sub>HPU</sub> | Os032935_01 | S4 | 0.000  | -1.298 | P | 226.584  | P | 170.789   | P | 419.936   | LOC_Os06g45920.1 |
| DG <sub>HPU</sub> | Os033126_01 | S4 | 0.000  | -1.285 | P | 318.440  | P | 255.807   | P | 623.336   | -                |
| DG <sub>HPU</sub> | Os033134_01 | S4 | 0.000  | -1.244 | P | 240.422  | P | 169.644   | P | 401.912   | LOC_Os07g22360.1 |
| DG <sub>HPU</sub> | Os033145_01 | S4 | -1.332 | 0.000  | P | 721.813  | P | 286.766   | P | 599.974   | LOC_Os01g49880.1 |
| DG <sub>HPU</sub> | Os033147_01 | S4 | 0.000  | -1.446 | P | 199.518  | P | 172.952   | P | 471.285   | LOC_Os04g10370.1 |
| DG <sub>HPU</sub> | Os033148_01 | S4 | 0.000  | -1.640 | P | 462.270  | P | 332.732   | P | 1036.760  | LOC_Os08g32550.1 |
| DG <sub>HPU</sub> | Os033149_01 | S4 | 0.000  | -1.849 | P | 232.757  | P | 199.098   | P | 717.015   | LOC_Os08g32560.1 |
| DG <sub>HPU</sub> | Os033599_01 | S4 | 0.000  | -1.240 | P | 349.570  | P | 459.609   | P | 1085.525  | LOC_Os12g04710.1 |
| DG <sub>HPU</sub> | Os033675_01 | S4 | 0.000  | -1.183 | P | 205.510  | P | 195.781   | P | 444.440   | LOC_Os08g39000.1 |
| DG <sub>HPU</sub> | Os033950_01 | S4 | 0.000  | 1.496  | P | 455.606  | P | 428.803   | P | 152.002   | -                |
| DG <sub>HPU</sub> | Os034051_01 | S4 | 0.000  | -1.376 | P | 171.639  | P | 183.824   | P | 476.980   | LOC_Os05g25670.1 |
| DG <sub>HPU</sub> | Os035714_01 | S4 | 0.000  | 1.446  | P | 144.343  | P | 288.155   | P | 105.770   | LOC_Os04g02970.1 |
| DG <sub>HPU</sub> | Os035879_01 | S4 | 0.000  | -1.253 | P | 183.829  | P | 188.976   | P | 450.502   | -                |
| DG <sub>HPU</sub> | Os036341_01 | S4 | 0.000  | 1.555  | P | 389.146  | P | 345.307   | P | 117.537   | LOC_Os07g05510.1 |
| DG <sub>HPU</sub> | Os036618_01 | S4 | 1.544  | 0.000  | P | 6494.155 | P | 18937.344 | P | 15423.703 | LOC_Os04g33830.1 |
| DG <sub>HPU</sub> | Os037264_01 | S4 | -1.082 | 0.000  | P | 882.589  | P | 416.789   | P | 513.619   | LOC_Os01g11620.1 |
| DG <sub>HPU</sub> | Os037569_01 | S4 | 0.000  | 1.481  | P | 327.076  | P | 359.670   | P | 128.839   | LOC_Os01g18710.1 |
| DG <sub>HPU</sub> | Os037594_01 | S4 | -1.481 | -1.448 | P | 2160.760 | P | 774.182   | P | 2112.860  | -                |
| DG <sub>HPU</sub> | Os037667_01 | S4 | -1.425 | 0.000  | P | 621.076  | P | 231.320   | P | 312.398   | LOC_Os10g26380.1 |

|                   |             |    |        |        |   |          |   |          |   |           |                  |
|-------------------|-------------|----|--------|--------|---|----------|---|----------|---|-----------|------------------|
| DG <sub>HPU</sub> | Os037793_01 | S4 | 0.000  | 1.435  | P | 319.695  | P | 307.507  | P | 113.742   | LOC_Os03g17130.1 |
| DG <sub>HPU</sub> | Os038136_01 | S4 | 1.505  | 0.000  | P | 184.758  | P | 524.222  | P | 572.311   | LOC_Os08g14990.1 |
| DG <sub>HPU</sub> | Os038269_01 | S4 | -1.868 | 10.000 | P | 721.451  | P | 197.680  | A | 27.593    | LOC_Os05g16980.1 |
| DG <sub>HPU</sub> | Os038303_01 | S4 | 1.458  | 0.000  | P | 122.015  | P | 335.198  | P | 253.733   | LOC_Os03g62270.1 |
| DG <sub>HPU</sub> | Os039479_01 | S4 | 0.000  | 2.014  | P | 210.393  | P | 288.137  | P | 71.346    | LOC_Os05g02140.1 |
| DG <sub>HPU</sub> | Os039978_01 | S4 | 0.000  | 1.660  | P | 502.972  | P | 528.769  | P | 167.323   | -                |
| DG <sub>HPU</sub> | Os040237_01 | S4 | 0.000  | 1.431  | P | 290.996  | P | 280.062  | P | 103.902   | LOC_Os02g22770.1 |
| DG <sub>HPU</sub> | Os040328_01 | S4 | 1.664  | 0.000  | P | 125.124  | P | 396.470  | P | 368.672   | LOC_Os05g31400.1 |
| DG <sub>HPU</sub> | Os040491_01 | S4 | -1.094 | 0.000  | P | 2751.170 | P | 1288.945 | P | 1013.686  | LOC_Os01g52910.1 |
| DG <sub>HPU</sub> | Os040604_01 | S4 | 0.000  | 1.447  | P | 151.499  | P | 218.116  | P | 80.013    | LOC_Os04g27820.1 |
| DG <sub>HPU</sub> | Os040811_01 | S4 | 1.475  | 0.000  | P | 146.361  | P | 407.000  | P | 434.683   | LOC_Os12g03500.1 |
| DG <sub>HPU</sub> | Os041146_01 | S4 | -1.284 | 10.000 | P | 1455.716 | P | 597.844  | A | 77.240    | -                |
| DG <sub>HPU</sub> | Os041507_01 | S4 | 1.430  | 0.000  | P | 661.399  | P | 1781.578 | P | 1244.270  | -                |
| DG <sub>HPU</sub> | Os041571_01 | S4 | 0.000  | 1.502  | P | 258.374  | P | 594.782  | P | 210.062   | LOC_Os07g02870.1 |
| DG <sub>HPU</sub> | Os041663_01 | S4 | 1.444  | 0.000  | P | 204.716  | P | 557.160  | P | 379.618   | LOC_Os01g70080.1 |
| DG <sub>HPU</sub> | Os042004_01 | S4 | 0.000  | 1.532  | P | 424.140  | P | 444.127  | P | 153.571   | LOC_Os06g14640.1 |
| DG <sub>HPU</sub> | Os042186_01 | S4 | 0.000  | 1.642  | P | 251.970  | P | 423.398  | P | 135.637   | LOC_Os04g43030.1 |
| DG <sub>HPU</sub> | Os042203_01 | S4 | 1.687  | 1.519  | P | 112.355  | P | 361.646  | P | 126.191   | -                |
| DG <sub>HPU</sub> | Os042254_01 | S4 | -1.189 | 0.000  | P | 1697.654 | P | 744.545  | P | 1417.752  | LOC_Os02g26380.1 |
| DG <sub>HPU</sub> | Os042854_01 | S4 | 0.000  | -1.317 | P | 7454.280 | P | 5041.625 | P | 12562.052 | LOC_Os04g26880.1 |
| DG <sub>HPU</sub> | Os043003_01 | S4 | 1.471  | 0.000  | P | 123.472  | P | 342.354  | P | 307.457   | LOC_Os05g31190.1 |
| DG <sub>HPU</sub> | Os043072_01 | S4 | 0.000  | 1.499  | P | 183.670  | P | 221.188  | P | 78.279    | -                |
| DG <sub>HPU</sub> | Os043100_01 | S4 | 1.441  | 0.000  | P | 248.410  | P | 674.604  | P | 419.015   | LOC_Os08g37070.1 |
| DG <sub>HPU</sub> | Os043332_01 | S4 | -1.112 | 0.000  | P | 1377.243 | P | 637.174  | P | 571.848   | LOC_Os01g07800.1 |
| DG <sub>HPU</sub> | Os043356_01 | S4 | 1.641  | 10.000 | P | 100.832  | P | 314.556  | A | 37.952    | LOC_Os04g50930.1 |
| DG <sub>HPU</sub> | Os043463_01 | S4 | 0.000  | 1.413  | P | 138.733  | P | 257.282  | P | 96.627    | LOC_Os05g09280.1 |
| DG <sub>HPU</sub> | Os043507_01 | S4 | 0.000  | -1.383 | P | 459.293  | P | 504.832  | P | 1316.366  | LOC_Os10g21040.1 |
| DG <sub>HPU</sub> | Os043570_01 | S4 | 1.762  | 10.000 | P | 96.773   | P | 328.307  | A | 0.387     | LOC_Os05g43100.1 |
| DG <sub>HPU</sub> | Os044283_01 | S4 | 1.772  | 0.000  | P | 271.537  | P | 927.299  | P | 688.208   | -                |
| DG <sub>HPU</sub> | Os044500_01 | S4 | 0.000  | 1.825  | P | 338.116  | P | 414.398  | P | 116.978   | LOC_Os05g02110.1 |
| DG <sub>HPU</sub> | Os044961_01 | S4 | 0.000  | 1.980  | P | 294.821  | P | 429.862  | P | 108.991   | LOC_Os03g24880.1 |

|                   |             |    |        |        |   |           |   |          |   |          |                  |
|-------------------|-------------|----|--------|--------|---|-----------|---|----------|---|----------|------------------|
| DG <sub>HPU</sub> | Os045312_01 | S4 | -1.107 | 0.000  | P | 502.527   | P | 233.327  | P | 288.264  | -                |
| DG <sub>HPU</sub> | Os045474_01 | S4 | 0.000  | -1.416 | P | 546.221   | P | 311.324  | P | 830.984  | LOC_Os06g11610.1 |
| DG <sub>HPU</sub> | Os045513_01 | S4 | -1.412 | 0.000  | P | 464.170   | P | 174.440  | P | 227.933  | LOC_Os04g36790.1 |
| DG <sub>HPU</sub> | Os045704_01 | S4 | -1.274 | 0.000  | P | 481.538   | P | 199.142  | P | 344.235  | LOC_Os08g04360.1 |
| DG <sub>HPU</sub> | Os045733_01 | S4 | -1.086 | 0.000  | P | 347.134   | P | 163.535  | P | 192.757  | LOC_Os06g39810.1 |
| DG <sub>HPU</sub> | Os045835_01 | S4 | 0.000  | -1.481 | P | 309.269   | P | 197.707  | P | 551.724  | LOC_Os12g32050.1 |
| DG <sub>HPU</sub> | Os046324_01 | S4 | 0.000  | 1.433  | P | 204.365   | P | 295.977  | P | 109.632  | LOC_Os12g02420.2 |
| DG <sub>HPU</sub> | Os046725_01 | S4 | -1.046 | 0.000  | P | 311.880   | P | 151.046  | P | 165.480  | LOC_Os10g20420.1 |
| DG <sub>HPU</sub> | Os046869_01 | S4 | -1.121 | 0.000  | P | 355.513   | P | 163.423  | P | 231.526  | LOC_Os11g30250.1 |
| DG <sub>HPU</sub> | Os046947_01 | S4 | -1.293 | 0.000  | P | 359.603   | P | 146.736  | P | 262.947  | -                |
| DG <sub>HPU</sub> | Os047001_01 | S4 | -1.078 | 0.000  | P | 475.875   | P | 225.338  | P | 210.925  | LOC_Os03g13400.1 |
| DG <sub>HPU</sub> | Os047219_01 | S4 | 0.000  | -1.226 | P | 345.737   | P | 352.366  | P | 824.196  | LOC_Os02g39170.1 |
| DG <sub>HPU</sub> | Os047260_01 | S4 | -1.073 | 0.000  | P | 7293.100  | P | 3467.319 | P | 3490.072 | LOC_Os06g34840.1 |
| DG <sub>HPU</sub> | Os047560_01 | S4 | 0.000  | 1.538  | P | 1182.619  | P | 1336.583 | P | 460.155  | LOC_Os07g12890.1 |
| DG <sub>HPU</sub> | Os048336_01 | S4 | 0.000  | -1.232 | P | 193.581   | P | 269.195  | P | 632.513  | LOC_Os01g61490.1 |
| DG <sub>HPU</sub> | Os048421_01 | S4 | -1.038 | 0.000  | P | 356.580   | P | 173.631  | P | 133.829  | LOC_Os04g47480.1 |
| DG <sub>HPU</sub> | Os048704_01 | S4 | -1.428 | 0.000  | P | 539.005   | P | 200.337  | P | 206.000  | -                |
| DG <sub>HPU</sub> | Os051905_01 | S4 | -1.417 | 0.000  | P | 3726.059  | P | 1395.766 | P | 2454.747 | LOC_Os01g74450.1 |
| DG <sub>HPU</sub> | Os051940_01 | S4 | 0.000  | 1.495  | P | 1567.469  | P | 1810.720 | P | 642.411  | LOC_Os10g39410.1 |
| DG <sub>HPU</sub> | Os051959_01 | S4 | -1.148 | 0.000  | P | 15055.415 | P | 6792.165 | P | 4905.820 | LOC_Os02g02400.1 |
| DG <sub>HPU</sub> | Os051981_01 | S4 | 0.000  | 1.608  | P | 3238.451  | P | 3139.995 | P | 1029.835 | LOC_Os11g47809.1 |
| DG <sub>HPU</sub> | Os051997_01 | S4 | 1.838  | 0.000  | P | 114.323   | P | 408.733  | P | 171.092  | LOC_Os04g54280.1 |
| DG <sub>HPU</sub> | Os052000_01 | S4 | -1.334 | 0.000  | P | 5244.337  | P | 2079.767 | P | 3184.090 | LOC_Os01g66120.1 |
| DG <sub>HPU</sub> | Os052050_01 | S4 | -1.116 | 0.000  | P | 12053.435 | P | 5560.807 | P | 5502.655 | LOC_Os01g64960.1 |
| DG <sub>HPU</sub> | Os052123_01 | S4 | 0.000  | 1.942  | P | 469.776   | P | 981.299  | P | 255.349  | LOC_Os06g04920.1 |
| DG <sub>HPU</sub> | Os052145_01 | S4 | 0.000  | -1.500 | P | 260.263   | P | 155.936  | P | 440.960  | LOC_Os01g53730.1 |
| DG <sub>HPU</sub> | Os052160_01 | S4 | -1.252 | 0.000  | P | 493.567   | P | 207.189  | P | 357.554  | LOC_Os01g58420.1 |
| DG <sub>HPU</sub> | Os052269_01 | S4 | 0.000  | 1.746  | P | 213.475   | P | 334.802  | P | 99.844   | LOC_Os06g35530.1 |
| DG <sub>HPU</sub> | Os052281_01 | S4 | 0.000  | -1.223 | P | 4058.469  | P | 4188.169 | P | 9779.753 | LOC_Os07g46460.1 |
| DG <sub>HPU</sub> | Os052310_01 | S4 | 0.000  | 1.697  | P | 270.589   | P | 376.796  | P | 116.237  | LOC_Os08g43640.1 |
| DG <sub>HPU</sub> | Os052323_01 | S4 | 1.576  | 0.000  | P | 201.698   | P | 601.448  | P | 535.003  | LOC_Os03g61260.2 |

|                   |             |    |        |        |   |          |   |           |   |           |                  |
|-------------------|-------------|----|--------|--------|---|----------|---|-----------|---|-----------|------------------|
| DG <sub>HPU</sub> | Os052340_01 | S4 | 0.000  | 1.440  | P | 307.964  | P | 389.012   | P | 143.377   | LOC_Os07g04500.1 |
| DG <sub>HPU</sub> | Os052473_01 | S4 | 0.000  | 1.443  | P | 503.660  | P | 507.904   | P | 186.756   | LOC_Os08g09240.2 |
| DG <sub>HPU</sub> | Os052700_01 | S4 | -1.659 | 0.000  | P | 827.824  | P | 262.101   | P | 300.288   | LOC_Os06g13190.1 |
| DG <sub>HPU</sub> | Os052724_01 | S4 | -1.139 | 0.000  | P | 585.420  | P | 265.853   | P | 180.296   | LOC_Os03g14910.1 |
| DG <sub>HPU</sub> | Os052943_01 | S4 | -1.053 | -1.646 | P | 361.034  | P | 174.056   | P | 544.774   | LOC_Os01g45570.1 |
| DG <sub>HPU</sub> | Os053035_01 | S4 | 0.000  | 1.407  | P | 365.262  | P | 414.457   | P | 156.288   | -                |
| DG <sub>HPU</sub> | Os053047_01 | S4 | 0.000  | 1.464  | P | 260.415  | P | 319.019   | P | 115.614   | LOC_Os07g47350.1 |
| DG <sub>HPU</sub> | Os053553_01 | S4 | -1.363 | 0.000  | P | 511.639  | P | 198.972   | P | 328.801   | LOC_Os01g54880.1 |
| DG <sub>HPU</sub> | Os053631_01 | S4 | 1.429  | 0.000  | P | 96.715   | P | 260.413   | P | 188.185   | LOC_Os01g14890.1 |
| DG <sub>HPU</sub> | Os053642_01 | S4 | 0.000  | 1.570  | P | 269.844  | P | 466.301   | P | 157.081   | LOC_Os01g67490.2 |
| DG <sub>HPU</sub> | Os053857_01 | S4 | -1.276 | 0.000  | P | 827.735  | P | 341.898   | P | 432.478   | LOC_Os01g40070.1 |
| DG <sub>HPU</sub> | Os053922_01 | S4 | -1.406 | 0.000  | P | 1496.732 | P | 564.937   | P | 624.394   | LOC_Os08g36500.1 |
| DG <sub>HPU</sub> | Os053954_01 | S4 | -1.037 | 0.000  | P | 536.186  | P | 261.387   | P | 182.535   | -                |
| DG <sub>HPU</sub> | Os054011_01 | S4 | 0.000  | -1.258 | P | 368.633  | P | 322.660   | P | 771.444   | LOC_Os01g03420.1 |
| DG <sub>HPU</sub> | Os054316_01 | S4 | 1.662  | 0.000  | P | 98.029   | P | 310.152   | P | 201.876   | LOC_Os12g32360.1 |
| DG <sub>HPU</sub> | Os054377_01 | S4 | 1.559  | 10.000 | P | 105.271  | P | 310.100   | A | 83.426    | LOC_Os05g31140.1 |
| DG <sub>HPU</sub> | Os054482_01 | S4 | -1.391 | 0.000  | P | 3257.434 | P | 1242.006  | P | 1801.668  | LOC_Os05g49890.1 |
| DG <sub>HPU</sub> | Os054496_01 | S4 | -1.420 | 0.000  | P | 1373.624 | P | 513.345   | P | 889.670   | LOC_Os08g41390.2 |
| DG <sub>HPU</sub> | Os054539_01 | S4 | 2.068  | 0.000  | P | 5393.622 | P | 22611.517 | P | 12846.402 | LOC_Os09g30340.1 |
| DG <sub>HPU</sub> | Os054553_01 | S4 | -1.134 | 0.000  | P | 1166.944 | P | 531.782   | P | 599.779   | LOC_Os08g44340.1 |
| DG <sub>HPU</sub> | Os054638_01 | S4 | -1.280 | -1.273 | P | 445.270  | P | 183.371   | P | 443.147   | -                |
| DG <sub>HPU</sub> | Os054673_01 | S4 | -1.913 | -1.187 | P | 3324.826 | P | 882.667   | P | 2009.564  | LOC_Os03g55540.1 |
| DG <sub>HPU</sub> | Os054682_01 | S4 | -1.389 | 0.000  | P | 808.446  | P | 308.608   | P | 341.367   | LOC_Os03g17700.1 |
| DG <sub>HPU</sub> | Os054699_01 | S4 | 0.000  | 1.443  | P | 7260.443 | P | 6897.873  | P | 2537.490  | -                |
| DG <sub>HPU</sub> | Os054764_01 | S4 | 0.000  | 1.446  | P | 700.147  | P | 750.031   | P | 275.218   | LOC_Os04g01540.1 |
| DG <sub>HPU</sub> | Os054785_01 | S4 | -3.121 | -2.439 | P | 1662.833 | P | 191.130   | P | 1036.574  | LOC_Os01g09220.1 |
| DG <sub>HPU</sub> | Os054951_01 | S4 | -1.038 | 0.000  | P | 1003.375 | P | 488.485   | P | 586.550   | LOC_Os01g50700.1 |
| DG <sub>HPU</sub> | Os054974_01 | S4 | -1.552 | 0.000  | P | 489.237  | P | 166.798   | P | 248.643   | -                |
| DG <sub>HPU</sub> | Os055029_01 | S4 | -1.065 | 0.000  | P | 578.146  | P | 276.385   | P | 172.518   | LOC_Os01g14440.1 |
| DG <sub>HPU</sub> | Os055108_01 | S4 | 1.732  | 0.000  | P | 96.413   | P | 320.206   | P | 292.759   | LOC_Os06g23430.2 |
| DG <sub>HPU</sub> | Os055142_01 | S4 | -1.066 | 0.000  | P | 667.238  | P | 318.810   | P | 510.692   | LOC_Os04g58890.1 |

|                   |                     |        |                  |        |                  |           |                    |               |   |                    |                  |
|-------------------|---------------------|--------|------------------|--------|------------------|-----------|--------------------|---------------|---|--------------------|------------------|
| DG <sub>HPU</sub> | Os055148_01         | S4     | 1.555            | 0.000  | P                | 753.553   | P                  | 2213.462      | P | 1356.321           | LOC_Os03g55030.1 |
| DG <sub>HPU</sub> | Os055171_01         | S4     | -2.062           | 0.000  | P                | 2318.477  | P                  | 555.413       | P | 937.648            | LOC_Os06g04230.1 |
| DG <sub>HPU</sub> | Os055222_01         | S4     | 1.430            | 0.000  | P                | 259.652   | P                  | 699.799       | P | 430.686            | LOC_Os01g59060.1 |
| DG <sub>HPU</sub> | Os055237_01         | S4     | 0.000            | 1.556  | P                | 200.722   | P                  | 315.997       | P | 107.449            | LOC_Os07g45570.1 |
| DG <sub>HPU</sub> | Os055517_01         | S4     | -1.556           | 0.000  | P                | 958.081   | P                  | 325.753       | P | 644.418            | LOC_Os02g10860.1 |
| DG <sub>HPU</sub> | Os055679_01         | S4     | 1.910            | 0.000  | P                | 124.426   | P                  | 467.558       | P | 199.903            | LOC_Os01g12270.1 |
| DG <sub>HPU</sub> | Os055739_02         | S4     | -1.529           | 0.000  | P                | 1598.744  | P                  | 553.990       | P | 640.828            | -                |
| DG <sub>HPU</sub> | Os056149_01         | S4     | 0.000            | -1.161 | P                | 1482.428  | P                  | 1839.015      | P | 4112.828           | LOC_Os01g22249.1 |
| DG <sub>HPU</sub> | Os056222_01         | S4     | -1.706           | 0.000  | P                | 1561.296  | P                  | 478.703       | P | 539.060            | LOC_Os06g01580.1 |
| DG <sub>HPU</sub> | Os056527_01         | S4     | 1.559            | 0.000  | P                | 137.983   | P                  | 406.439       | P | 173.598            | -                |
| DG <sub>HPU</sub> | Os056638_01         | S4     | 0.000            | -1.209 | P                | 427.361   | P                  | 253.988       | P | 587.288            | -                |
| DG <sub>HPU</sub> | Os056903_02         | S4     | 0.000            | -1.518 | P                | 296.311   | P                  | 199.233       | P | 570.662            | LOC_Os01g59510.1 |
| DG <sub>HPU</sub> | Os057614_02         | S4     | 1.572            | 0.000  | P                | 317.493   | P                  | 943.723       | P | 605.481            | LOC_Os06g22060.1 |
| DG <sub>HPU</sub> | GeneID              | period | log2(Ratio(L/9)) |        | log2(Ratio(L/P)) |           | Fi.pncle_9311.flag | Fi.pncle_9311 |   | Fi.pncle_LYP9.flag | Fi.pncle_LYP9    |
|                   | Fi.pncle_PA64s.flag |        | Fi.pncle_PA64s   |        | TIGR5.id         |           |                    |               |   |                    |                  |
| DG <sub>HPU</sub> | Os000187_01         | S7     | 0.824            | 0.000  | P                | 2841.371  | P                  | 5028.433      | P | 2692.982           | LOC_Os03g63360.1 |
| DG <sub>HPU</sub> | Os000237_01         | S7     | 0.955            | 1.641  | P                | 1530.755  | P                  | 2967.486      | P | 951.167            | LOC_Os01g71190.1 |
| DG <sub>HPU</sub> | Os000254_01         | S7     | -1.204           | -1.577 | P                | 1446.448  | P                  | 627.798       | P | 1873.277           | -                |
| DG <sub>HPU</sub> | Os000277_01         | S7     | -0.774           | 0.000  | P                | 309.044   | P                  | 180.698       | A | 92.809             | LOC_Os09g33450.1 |
| DG <sub>HPU</sub> | Os000342_01         | S7     | -0.967           | 0.000  | P                | 1286.412  | P                  | 657.881       | P | 422.973            | LOC_Os10g34180.2 |
| DG <sub>HPU</sub> | Os000367_01         | S7     | -0.999           | 0.000  | P                | 606.857   | P                  | 303.603       | P | 572.187            | LOC_Os06g01850.1 |
| DG <sub>HPU</sub> | Os000416_01         | S7     | 0.000            | -1.538 | P                | 302.537   | P                  | 234.585       | P | 681.090            | LOC_Os08g39450.1 |
| DG <sub>HPU</sub> | Os000439_01         | S7     | -0.786           | 0.000  | P                | 826.313   | P                  | 479.192       | P | 305.741            | LOC_Os02g57110.1 |
| DG <sub>HPU</sub> | Os000481_01         | S7     | 0.000            | 1.807  | P                | 1068.972  | P                  | 1309.457      | P | 374.306            | -                |
| DG <sub>HPU</sub> | Os000548_01         | S7     | 1.085            | 0.000  | P                | 124.249   | P                  | 263.655       | P | 314.831            | LOC_Os07g09040.1 |
| DG <sub>HPU</sub> | Os000616_01         | S7     | 0.788            | 0.000  | P                | 12085.327 | P                  | 20874.019     | P | 11776.126          | LOC_Os05g34854.2 |
| DG <sub>HPU</sub> | Os000805_01         | S7     | -0.806           | 0.000  | P                | 269.111   | P                  | 153.879       | A | 81.146             | LOC_Os09g20820.1 |
| DG <sub>HPU</sub> | Os000842_01         | S7     | 0.000            | -1.746 | A                | 85.181    | P                  | 283.486       | P | 950.685            | LOC_Os12g33130.1 |
| DG <sub>HPU</sub> | Os001004_01         | S7     | 0.729            | 0.000  | P                | 5185.630  | P                  | 8592.550      | P | 4982.624           | LOC_Os01g58310.1 |
| DG <sub>HPU</sub> | Os001215_01         | S7     | -1.163           | 0.000  | P                | 2977.952  | P                  | 1329.994      | P | 2350.544           | LOC_Os03g55450.2 |
| DG <sub>HPU</sub> | Os001620_01         | S7     | 0.981            | 0.000  | P                | 152.529   | P                  | 301.056       | P | 348.193            | LOC_Os07g16610.1 |



|                   |             |    |        |        |   |          |   |           |   |           |                  |
|-------------------|-------------|----|--------|--------|---|----------|---|-----------|---|-----------|------------------|
| DG <sub>HPU</sub> | Os001651_01 | S7 | 0.000  | -1.414 | A | 93.194   | P | 141.372   | P | 376.737   | LOC_Os02g50640.1 |
| DG <sub>HPU</sub> | Os001666_01 | S7 | -0.845 | 0.000  | P | 333.414  | P | 185.552   | A | 79.221    | LOC_Os04g49680.1 |
| DG <sub>HPU</sub> | Os001738_01 | S7 | -1.410 | 0.000  | P | 731.343  | P | 275.141   | P | 373.306   | LOC_Os02g41860.2 |
| DG <sub>HPU</sub> | Os001786_01 | S7 | 0.000  | -1.961 | A | 101.315  | P | 137.138   | P | 534.057   | LOC_Os02g09980.1 |
| DG <sub>HPU</sub> | Os001934_01 | S7 | 0.000  | -3.169 | A | 32.753   | P | 223.707   | P | 2012.557  | -                |
| DG <sub>HPU</sub> | Os001936_01 | S7 | 0.000  | -2.057 | A | 187.543  | P | 522.065   | P | 2173.004  | LOC_Os06g30390.1 |
| DG <sub>HPU</sub> | Os001958_01 | S7 | -0.978 | -1.960 | P | 872.823  | P | 443.067   | P | 1723.710  | LOC_Os02g37060.1 |
| DG <sub>HPU</sub> | Os002063_01 | S7 | 0.902  | 0.000  | P | 162.381  | P | 303.448   | P | 205.793   | LOC_Os04g38360.1 |
| DG <sub>HPU</sub> | Os002094_01 | S7 | -0.935 | -2.285 | P | 333.130  | P | 174.255   | P | 849.295   | LOC_Os12g36840.1 |
| DG <sub>HPU</sub> | Os002104_02 | S7 | 0.000  | -1.486 | P | 177.375  | P | 140.321   | P | 393.153   | -                |
| DG <sub>HPU</sub> | Os002197_01 | S7 | -1.216 | 0.000  | P | 1047.101 | P | 450.700   | A | 111.619   | LOC_Os01g63250.1 |
| DG <sub>HPU</sub> | Os002678_01 | S7 | -1.304 | 0.000  | P | 741.529  | P | 300.393   | P | 486.546   | LOC_Os05g03920.1 |
| DG <sub>HPU</sub> | Os003371_01 | S7 | 0.000  | -1.473 | A | 150.424  | P | 340.337   | P | 944.861   | LOC_Os11g09970.1 |
| DG <sub>HPU</sub> | Os004239_02 | S7 | 0.842  | 0.000  | P | 2494.314 | P | 4470.328  | P | 1873.541  | -                |
| DG <sub>HPU</sub> | Os005941_01 | S7 | -0.881 | -1.525 | P | 4899.527 | P | 2661.314  | P | 7660.775  | LOC_Os09g31300.1 |
| DG <sub>HPU</sub> | Os005944_01 | S7 | 0.000  | -1.650 | P | 4649.063 | P | 2816.973  | P | 8842.303  | LOC_Os04g51070.1 |
| DG <sub>HPU</sub> | Os005953_01 | S7 | 0.000  | -1.831 | P | 6894.917 | P | 4086.208  | P | 14540.769 | LOC_Os06g30020.1 |
| DG <sub>HPU</sub> | Os005956_01 | S7 | 0.000  | -1.577 | P | 3175.466 | P | 1968.680  | P | 5872.722  | LOC_Os03g18710.1 |
| DG <sub>HPU</sub> | Os005967_01 | S7 | 0.000  | -1.447 | P | 5244.253 | P | 3405.615  | P | 9286.472  | LOC_Os07g08360.1 |
| DG <sub>HPU</sub> | Os005968_01 | S7 | 0.000  | -1.432 | P | 1490.832 | P | 938.107   | P | 2531.824  | LOC_Os06g03750.1 |
| DG <sub>HPU</sub> | Os006016_01 | S7 | 0.000  | -1.741 | P | 1449.582 | P | 1012.828  | P | 3384.467  | LOC_Os01g25386.1 |
| DG <sub>HPU</sub> | Os006047_01 | S7 | 0.807  | 0.000  | P | 3138.534 | P | 5492.890  | P | 2607.688  | LOC_Os10g30600.2 |
| DG <sub>HPU</sub> | Os006201_01 | S7 | 0.943  | 0.000  | P | 328.709  | P | 631.835   | P | 241.685   | LOC_Os03g09290.1 |
| DG <sub>HPU</sub> | Os006571_01 | S7 | 0.000  | -1.933 | P | 1872.397 | P | 1115.453  | P | 4259.027  | LOC_Os05g01350.1 |
| DG <sub>HPU</sub> | Os007263_01 | S7 | 0.000  | -1.607 | A | 72.747   | P | 205.702   | P | 626.573   | LOC_Os12g33150.1 |
| DG <sub>HPU</sub> | Os007273_01 | S7 | -0.846 | 0.000  | P | 607.463  | P | 337.987   | P | 342.777   | LOC_Os03g05920.1 |
| DG <sub>HPU</sub> | Os008437_01 | S7 | 0.782  | 0.000  | P | 6608.431 | P | 11360.928 | P | 5427.503  | LOC_Os02g02410.1 |
| DG <sub>HPU</sub> | Os008441_01 | S7 | 0.000  | 1.937  | P | 2287.317 | P | 3124.832  | P | 815.888   | LOC_Os03g49190.1 |
| DG <sub>HPU</sub> | Os008556_01 | S7 | -0.833 | -1.914 | P | 1293.375 | P | 726.247   | P | 2737.759  | LOC_Os02g44630.2 |
| DG <sub>HPU</sub> | Os008707_01 | S7 | 0.000  | 1.551  | P | 1814.761 | P | 1758.295  | P | 600.086   | LOC_Os03g13730.1 |
| DG <sub>HPU</sub> | Os008737_01 | S7 | 0.000  | 1.613  | P | 1097.786 | P | 1213.528  | P | 396.695   | LOC_Os08g34190.1 |

|                   |             |    |        |        |   |          |   |           |   |           |                  |
|-------------------|-------------|----|--------|--------|---|----------|---|-----------|---|-----------|------------------|
| DG <sub>HPU</sub> | Os008822_01 | S7 | -0.829 | 0.000  | P | 7834.684 | P | 4411.278  | P | 3186.722  | LOC_Os03g41110.1 |
| DG <sub>HPU</sub> | Os008855_01 | S7 | -1.427 | 0.000  | P | 2253.914 | P | 838.177   | P | 1128.025  | -                |
| DG <sub>HPU</sub> | Os008905_01 | S7 | 0.000  | -1.377 | P | 1318.405 | P | 1389.046  | P | 3608.556  | LOC_Os06g37000.2 |
| DG <sub>HPU</sub> | Os008912_01 | S7 | -0.962 | 0.000  | P | 688.528  | P | 353.441   | P | 295.547   | LOC_Os03g27230.1 |
| DG <sub>HPU</sub> | Os008979_01 | S7 | 0.000  | -1.577 | P | 411.685  | P | 270.115   | P | 805.685   | LOC_Os01g17170.1 |
| DG <sub>HPU</sub> | Os009002_01 | S7 | 1.072  | 0.000  | P | 8843.264 | P | 18591.217 | P | 10179.434 | LOC_Os05g42000.1 |
| DG <sub>HPU</sub> | Os009127_01 | S7 | -1.021 | 0.000  | P | 453.756  | P | 223.535   | A | 74.261    | LOC_Os03g41675.1 |
| DG <sub>HPU</sub> | Os009610_01 | S7 | -0.830 | 0.000  | P | 268.269  | P | 150.919   | P | 138.475   | -                |
| DG <sub>HPU</sub> | Os009688_01 | S7 | 1.200  | 0.000  | P | 132.963  | P | 305.474   | P | 308.182   | LOC_Os01g55650.1 |
| DG <sub>HPU</sub> | Os009698_01 | S7 | 0.000  | 1.740  | P | 1967.651 | P | 2302.513  | P | 689.452   | -                |
| DG <sub>HPU</sub> | Os009786_01 | S7 | -0.789 | 0.000  | P | 348.928  | P | 201.887   | P | 127.598   | LOC_Os03g24020.1 |
| DG <sub>HPU</sub> | Os009788_01 | S7 | 0.000  | 1.489  | P | 423.867  | P | 445.627   | P | 158.799   | LOC_Os05g07040.1 |
| DG <sub>HPU</sub> | Os009835_01 | S7 | -0.838 | 0.000  | P | 959.743  | P | 536.945   | P | 1004.580  | LOC_Os12g36830.1 |
| DG <sub>HPU</sub> | Os009844_01 | S7 | 0.000  | -1.414 | P | 302.703  | P | 243.487   | P | 648.947   | LOC_Os12g08730.1 |
| DG <sub>HPU</sub> | Os009883_01 | S7 | -1.100 | 0.000  | P | 2326.338 | P | 1085.259  | P | 2000.573  | LOC_Os02g51080.1 |
| DG <sub>HPU</sub> | Os010113_01 | S7 | 0.000  | -1.545 | P | 657.438  | P | 442.118   | P | 1289.692  | LOC_Os08g34210.1 |
| DG <sub>HPU</sub> | Os010147_01 | S7 | -0.996 | 0.000  | P | 630.860  | P | 316.351   | P | 764.358   | LOC_Os12g43670.1 |
| DG <sub>HPU</sub> | Os010219_01 | S7 | 1.343  | 0.000  | P | 210.075  | P | 532.747   | P | 454.034   | -                |
| DG <sub>HPU</sub> | Os010257_01 | S7 | -0.833 | 0.000  | P | 917.765  | P | 515.253   | A | 66.061    | LOC_Os02g47130.1 |
| DG <sub>HPU</sub> | Os010262_01 | S7 | 0.845  | 0.000  | P | 300.756  | P | 540.375   | P | 590.084   | LOC_Os07g45790.1 |
| DG <sub>HPU</sub> | Os010471_01 | S7 | -0.773 | 0.000  | P | 1267.527 | P | 741.685   | P | 815.222   | -                |
| DG <sub>HPU</sub> | Os010519_01 | S7 | 0.000  | 1.623  | P | 267.718  | P | 402.605   | P | 130.684   | LOC_Os04g31460.1 |
| DG <sub>HPU</sub> | Os010543_01 | S7 | 0.934  | 1.521  | P | 264.501  | P | 505.417   | P | 176.106   | LOC_Os02g24700.1 |
| DG <sub>HPU</sub> | Os010687_01 | S7 | 0.931  | 0.000  | P | 390.470  | P | 744.493   | P | 624.389   | LOC_Os02g03060.1 |
| DG <sub>HPU</sub> | Os010761_01 | S7 | -0.996 | 0.000  | P | 1165.486 | P | 584.165   | P | 1202.738  | -                |
| DG <sub>HPU</sub> | Os010778_01 | S7 | 0.000  | -1.380 | P | 208.493  | P | 212.618   | P | 553.455   | LOC_Os09g31438.1 |
| DG <sub>HPU</sub> | Os010812_01 | S7 | 0.760  | 0.000  | P | 120.761  | P | 204.543   | P | 196.198   | LOC_Os04g51450.1 |
| DG <sub>HPU</sub> | Os010857_01 | S7 | -1.103 | 0.000  | P | 1347.752 | P | 627.638   | P | 469.098   | -                |
| DG <sub>HPU</sub> | Os011262_01 | S7 | 0.000  | -1.399 | P | 270.726  | P | 207.513   | P | 547.397   | LOC_Os02g52150.2 |
| DG <sub>HPU</sub> | Os011327_01 | S7 | -1.084 | 0.000  | P | 354.959  | P | 167.407   | A | 96.439    | LOC_Os02g31030.1 |
| DG <sub>HPU</sub> | Os011374_01 | S7 | -0.799 | 0.000  | P | 437.238  | P | 251.296   | P | 379.980   | LOC_Os12g33944.1 |

|                   |             |    |        |        |   |          |   |          |   |           |                  |
|-------------------|-------------|----|--------|--------|---|----------|---|----------|---|-----------|------------------|
| DG <sub>HPU</sub> | Os011443_01 | S7 | 0.722  | 0.000  | P | 4410.726 | P | 7275.233 | P | 3760.505  | LOC_Os03g25340.1 |
| DG <sub>HPU</sub> | Os011451_01 | S7 | 0.747  | 1.563  | P | 244.290  | P | 410.044  | P | 138.737   | LOC_Os07g43250.1 |
| DG <sub>HPU</sub> | Os011660_01 | S7 | 0.000  | -1.381 | P | 215.755  | P | 160.763  | P | 418.700   | LOC_Os06g45820.1 |
| DG <sub>HPU</sub> | Os011824_01 | S7 | 0.000  | 1.515  | P | 1896.482 | P | 1797.458 | P | 628.874   | LOC_Os09g27420.1 |
| DG <sub>HPU</sub> | Os011998_01 | S7 | 0.992  | 0.000  | P | 218.228  | P | 433.929  | P | 213.670   | LOC_Os02g33770.1 |
| DG <sub>HPU</sub> | Os012005_01 | S7 | -0.944 | 0.000  | P | 2896.106 | P | 1505.271 | P | 1517.368  | LOC_Os03g58640.1 |
| DG <sub>HPU</sub> | Os012084_01 | S7 | 0.731  | 0.000  | P | 199.118  | P | 330.530  | A | 181.160   | LOC_Os06g10690.1 |
| DG <sub>HPU</sub> | Os012239_01 | S7 | -1.553 | 0.000  | P | 3427.573 | P | 1168.023 | P | 1554.487  | -                |
| DG <sub>HPU</sub> | Os012277_01 | S7 | 0.000  | 1.748  | P | 826.118  | P | 1350.935 | P | 402.120   | LOC_Os05g49170.1 |
| DG <sub>HPU</sub> | Os012311_01 | S7 | -1.267 | 0.000  | P | 3618.807 | P | 1503.610 | P | 2981.143  | LOC_Os03g63150.2 |
| DG <sub>HPU</sub> | Os012346_01 | S7 | 0.000  | -1.421 | P | 168.170  | P | 160.555  | P | 430.007   | LOC_Os02g55120.1 |
| DG <sub>HPU</sub> | Os012349_01 | S7 | 0.000  | -1.452 | A | 99.514   | P | 124.362  | P | 340.266   | LOC_Os03g61220.1 |
| DG <sub>HPU</sub> | Os012425_01 | S7 | 0.784  | 0.000  | P | 159.818  | P | 275.205  | P | 368.004   | -                |
| DG <sub>HPU</sub> | Os012450_01 | S7 | 0.726  | 0.000  | P | 224.267  | P | 370.831  | P | 281.705   | LOC_Os05g33850.1 |
| DG <sub>HPU</sub> | Os012695_01 | S7 | 0.000  | -1.663 | P | 290.278  | P | 213.249  | P | 675.267   | LOC_Os02g43519.1 |
| DG <sub>HPU</sub> | Os012753_01 | S7 | -0.886 | 0.000  | P | 1419.848 | P | 768.507  | P | 1342.972  | -                |
| DG <sub>HPU</sub> | Os012813_01 | S7 | 0.000  | 1.590  | P | 5317.088 | P | 6219.339 | P | 2065.537  | LOC_Os03g03660.4 |
| DG <sub>HPU</sub> | Os013099_01 | S7 | 0.000  | -1.391 | P | 265.185  | P | 242.652  | P | 636.208   | LOC_Os04g39814.2 |
| DG <sub>HPU</sub> | Os013133_01 | S7 | 0.000  | -1.532 | P | 1485.321 | P | 1076.469 | P | 3112.883  | LOC_Os03g02560.1 |
| DG <sub>HPU</sub> | Os013159_01 | S7 | -1.347 | -2.127 | P | 8262.199 | P | 3247.514 | P | 14182.455 | LOC_Os09g12540.1 |
| DG <sub>HPU</sub> | Os013169_01 | S7 | 0.000  | -1.711 | P | 535.912  | P | 355.040  | P | 1162.184  | LOC_Os04g36720.1 |
| DG <sub>HPU</sub> | Os013198_01 | S7 | 1.024  | 0.000  | P | 1361.300 | P | 2768.765 | P | 1598.095  | LOC_Os06g43510.2 |
| DG <sub>HPU</sub> | Os013244_01 | S7 | 0.871  | 0.000  | P | 192.836  | P | 352.572  | P | 173.220   | LOC_Os05g06990.1 |
| DG <sub>HPU</sub> | Os013250_01 | S7 | 1.248  | 0.000  | P | 782.013  | P | 1857.552 | P | 1088.079  | LOC_Os01g05510.5 |
| DG <sub>HPU</sub> | Os013284_01 | S7 | 0.000  | -1.505 | P | 208.587  | P | 171.976  | P | 488.111   | LOC_Os09g28630.1 |
| DG <sub>HPU</sub> | Os013374_01 | S7 | 0.000  | -1.576 | P | 412.475  | P | 325.771  | P | 971.369   | LOC_Os03g58960.1 |
| DG <sub>HPU</sub> | Os013432_01 | S7 | 0.000  | -2.016 | A | 124.379  | P | 201.510  | P | 814.910   | -                |
| DG <sub>HPU</sub> | Os013439_01 | S7 | 0.874  | 0.000  | P | 1862.879 | P | 3415.068 | P | 1757.202  | LOC_Os02g02770.1 |
| DG <sub>HPU</sub> | Os013712_01 | S7 | -1.100 | -2.063 | P | 5917.054 | P | 2759.895 | P | 11531.975 | LOC_Os09g26810.1 |
| DG <sub>HPU</sub> | Os013725_01 | S7 | -1.377 | 0.000  | P | 2350.330 | P | 905.002  | P | 1121.170  | LOC_Os04g43800.1 |
| DG <sub>HPU</sub> | Os013901_01 | S7 | 0.771  | 0.000  | P | 2569.899 | P | 4385.966 | P | 2829.775  | LOC_Os04g42690.1 |

|                   |             |    |        |        |   |           |   |           |   |           |                  |
|-------------------|-------------|----|--------|--------|---|-----------|---|-----------|---|-----------|------------------|
| DG <sub>HPU</sub> | Os013937_01 | S7 | -1.747 | 0.000  | P | 3618.150  | P | 1077.918  | P | 1613.468  | LOC_Os05g07860.1 |
| DG <sub>HPU</sub> | Os013958_01 | S7 | 0.000  | -1.657 | P | 617.052   | P | 438.424   | P | 1382.583  | LOC_Os01g18080.1 |
| DG <sub>HPU</sub> | Os014071_01 | S7 | -1.774 | -2.554 | P | 7510.850  | P | 2195.844  | P | 12892.387 | LOC_Os12g19470.2 |
| DG <sub>HPU</sub> | Os014166_01 | S7 | -1.424 | -2.028 | P | 629.743   | P | 234.692   | P | 957.141   | LOC_Os08g02160.1 |
| DG <sub>HPU</sub> | Os014181_01 | S7 | 0.735  | 0.000  | P | 150.785   | P | 250.957   | P | 306.348   | LOC_Os11g32260.1 |
| DG <sub>HPU</sub> | Os014183_01 | S7 | 0.781  | 0.000  | P | 13560.463 | P | 23298.974 | P | 16655.402 | LOC_Os02g07690.1 |
| DG <sub>HPU</sub> | Os014245_01 | S7 | 0.000  | 1.632  | P | 814.382   | P | 1124.673  | P | 362.981   | LOC_Os04g40660.3 |
| DG <sub>HPU</sub> | Os014261_01 | S7 | -1.040 | -1.873 | P | 347.346   | P | 168.976   | P | 618.989   | LOC_Os06g33710.3 |
| DG <sub>HPU</sub> | Os014299_01 | S7 | 0.769  | 0.000  | P | 235.902   | P | 401.882   | P | 281.923   | LOC_Os05g46200.1 |
| DG <sub>HPU</sub> | Os014344_01 | S7 | -0.918 | -1.691 | P | 479.396   | P | 253.632   | P | 818.891   | LOC_Os05g46360.1 |
| DG <sub>HPU</sub> | Os014402_01 | S7 | 0.000  | -1.679 | A | 88.559    | P | 224.609   | P | 719.141   | LOC_Os04g37580.1 |
| DG <sub>HPU</sub> | Os014409_01 | S7 | 0.779  | 0.000  | P | 3857.953  | P | 6621.333  | P | 3872.962  | LOC_Os08g35939.1 |
| DG <sub>HPU</sub> | Os014441_01 | S7 | 0.000  | 1.655  | P | 442.300   | P | 584.798   | P | 185.638   | LOC_Os03g48310.1 |
| DG <sub>HPU</sub> | Os014461_01 | S7 | 0.000  | 2.108  | A | 296.702   | P | 814.015   | P | 188.879   | LOC_Os01g63870.2 |
| DG <sub>HPU</sub> | Os014556_01 | S7 | 0.802  | 1.720  | P | 310.839   | P | 542.012   | P | 164.474   | LOC_Os01g56870.1 |
| DG <sub>HPU</sub> | Os014673_01 | S7 | -0.998 | 0.000  | P | 1306.782  | P | 654.278   | P | 1066.363  | LOC_Os02g42740.1 |
| DG <sub>HPU</sub> | Os014760_01 | S7 | 0.000  | -1.527 | P | 282.817   | P | 257.999   | P | 743.667   | LOC_Os04g37710.1 |
| DG <sub>HPU</sub> | Os014801_01 | S7 | 0.000  | -1.654 | A | 143.015   | P | 198.585   | P | 625.037   | LOC_Os06g40210.1 |
| DG <sub>HPU</sub> | Os014879_01 | S7 | 1.518  | 0.000  | P | 106.151   | P | 304.096   | A | 321.302   | LOC_Os10g40550.2 |
| DG <sub>HPU</sub> | Os014986_01 | S7 | -0.777 | 0.000  | P | 598.289   | P | 349.189   | P | 250.679   | LOC_Os03g45390.1 |
| DG <sub>HPU</sub> | Os015064_01 | S7 | 0.000  | -1.393 | P | 377.612   | P | 368.668   | P | 968.170   | LOC_Os02g40010.2 |
| DG <sub>HPU</sub> | Os015105_01 | S7 | 1.023  | 0.000  | P | 207.515   | P | 421.800   | P | 203.205   | LOC_Os11g34710.1 |
| DG <sub>HPU</sub> | Os015132_01 | S7 | 0.760  | 0.000  | P | 193.030   | P | 326.867   | P | 352.544   | LOC_Os01g40420.1 |
| DG <sub>HPU</sub> | Os015151_01 | S7 | 0.000  | -2.029 | P | 203.878   | P | 130.813   | P | 534.008   | LOC_Os10g02840.1 |
| DG <sub>HPU</sub> | Os015340_01 | S7 | 0.000  | -1.554 | P | 334.071   | P | 269.365   | P | 790.708   | -                |
| DG <sub>HPU</sub> | Os015562_01 | S7 | 0.990  | 0.000  | P | 175.530   | P | 348.518   | A | 606.960   | LOC_Os12g05730.1 |
| DG <sub>HPU</sub> | Os015569_01 | S7 | 0.000  | -1.476 | P | 336.026   | P | 257.931   | P | 717.342   | LOC_Os03g03350.1 |
| DG <sub>HPU</sub> | Os015581_01 | S7 | 0.000  | -1.393 | P | 3556.675  | P | 2265.830  | P | 5950.242  | LOC_Os05g41900.2 |
| DG <sub>HPU</sub> | Os015582_01 | S7 | -0.855 | -1.600 | P | 558.055   | P | 308.548   | P | 935.154   | LOC_Os04g45900.1 |
| DG <sub>HPU</sub> | Os015672_01 | S7 | 0.000  | -1.495 | P | 209.499   | P | 177.003   | P | 498.968   | LOC_Os12g10540.4 |
| DG <sub>HPU</sub> | Os015885_01 | S7 | -1.005 | 0.000  | P | 1275.722  | P | 635.856   | P | 489.576   | -                |

|                   |             |    |        |        |   |           |   |           |   |           |                  |
|-------------------|-------------|----|--------|--------|---|-----------|---|-----------|---|-----------|------------------|
| DG <sub>HPU</sub> | Os015963_01 | S7 | 0.000  | -1.599 | P | 684.775   | P | 493.264   | P | 1494.005  | LOC_Os03g10620.1 |
| DG <sub>HPU</sub> | Os016102_01 | S7 | -1.630 | 0.000  | P | 2616.095  | P | 845.412   | P | 1037.527  | LOC_Os03g40100.1 |
| DG <sub>HPU</sub> | Os016154_01 | S7 | 0.000  | -1.860 | A | 83.549    | P | 175.098   | P | 635.672   | LOC_Os12g23780.2 |
| DG <sub>HPU</sub> | Os016157_01 | S7 | 0.818  | 0.000  | P | 204.219   | P | 360.150   | P | 489.508   | LOC_Os09g01640.1 |
| DG <sub>HPU</sub> | Os016158_01 | S7 | 0.775  | 0.000  | P | 144.214   | P | 246.707   | P | 216.482   | LOC_Os11g42800.1 |
| DG <sub>HPU</sub> | Os016190_01 | S7 | 0.000  | -1.406 | P | 182.831   | P | 171.271   | P | 453.824   | LOC_Os12g28177.1 |
| DG <sub>HPU</sub> | Os016207_01 | S7 | 0.778  | 0.000  | P | 123.155   | P | 211.245   | P | 172.386   | LOC_Os03g61140.1 |
| DG <sub>HPU</sub> | Os016221_01 | S7 | 0.000  | 2.174  | P | 1899.947  | P | 2924.606  | P | 648.170   | LOC_Os05g02060.1 |
| DG <sub>HPU</sub> | Os016225_01 | S7 | 0.000  | -1.418 | P | 675.366   | P | 654.811   | P | 1750.185  | LOC_Os01g52260.1 |
| DG <sub>HPU</sub> | Os016331_01 | S7 | 0.788  | 0.000  | P | 166.478   | P | 287.379   | P | 318.594   | LOC_Os06g02450.1 |
| DG <sub>HPU</sub> | Os016332_01 | S7 | 0.000  | -1.492 | P | 675.703   | P | 639.444   | P | 1798.288  | LOC_Os04g40300.1 |
| DG <sub>HPU</sub> | Os016432_01 | S7 | 0.000  | -1.500 | P | 543.655   | P | 383.943   | P | 1085.902  | LOC_Os03g05390.6 |
| DG <sub>HPU</sub> | Os016456_01 | S7 | 0.000  | 1.811  | P | 1055.816  | P | 1348.390  | P | 384.378   | LOC_Os02g01010.1 |
| DG <sub>HPU</sub> | Os016500_01 | S7 | 0.000  | -1.402 | P | 616.680   | P | 370.452   | P | 978.725   | LOC_Os02g57280.1 |
| DG <sub>HPU</sub> | Os016701_01 | S7 | 0.000  | -1.419 | A | 92.968    | P | 133.307   | P | 356.538   | LOC_Os06g44160.1 |
| DG <sub>HPU</sub> | Os016769_01 | S7 | 0.864  | 0.000  | P | 284.608   | P | 518.072   | P | 296.791   | LOC_Os02g04330.2 |
| DG <sub>HPU</sub> | Os016771_01 | S7 | -1.475 | 0.000  | P | 2533.449  | P | 911.500   | P | 853.364   | LOC_Os07g37530.2 |
| DG <sub>HPU</sub> | Os016793_01 | S7 | 0.000  | -1.387 | A | 95.684    | P | 117.903   | P | 308.281   | LOC_Os02g52780.1 |
| DG <sub>HPU</sub> | Os016818_01 | S7 | 0.000  | -1.429 | P | 290.073   | P | 210.888   | P | 567.710   | LOC_Os02g01150.2 |
| DG <sub>HPU</sub> | Os017021_01 | S7 | -0.821 | 0.000  | P | 449.909   | P | 254.730   | P | 512.061   | LOC_Os09g01140.1 |
| DG <sub>HPU</sub> | Os017149_01 | S7 | 0.000  | -1.563 | P | 417.246   | P | 369.210   | P | 1090.543  | LOC_Os03g01030.1 |
| DG <sub>HPU</sub> | Os017217_01 | S7 | 1.050  | 0.000  | P | 286.910   | P | 594.133   | P | 249.137   | LOC_Os03g21620.1 |
| DG <sub>HPU</sub> | Os017409_01 | S7 | 0.000  | -1.525 | P | 336.812   | P | 310.187   | P | 892.629   | LOC_Os12g01449.1 |
| DG <sub>HPU</sub> | Os017416_01 | S7 | -0.939 | 0.000  | P | 369.495   | P | 192.706   | P | 130.711   | LOC_Os10g05980.1 |
| DG <sub>HPU</sub> | Os017420_01 | S7 | -0.790 | 0.000  | P | 318.153   | P | 183.978   | P | 413.464   | LOC_Os02g36210.1 |
| DG <sub>HPU</sub> | Os017640_01 | S7 | 0.000  | -1.433 | P | 299.448   | P | 210.118   | P | 567.416   | LOC_Os05g22614.1 |
| DG <sub>HPU</sub> | Os017707_01 | S7 | 0.725  | 0.000  | P | 191.456   | P | 316.364   | P | 378.633   | LOC_Os05g07070.7 |
| DG <sub>HPU</sub> | Os017843_01 | S7 | 0.000  | 1.681  | P | 446.716   | P | 495.071   | P | 154.351   | LOC_Os05g40790.1 |
| DG <sub>HPU</sub> | Os017858_01 | S7 | -0.838 | 0.000  | P | 22370.853 | P | 12514.694 | P | 13561.179 | LOC_Os03g56580.1 |
| DG <sub>HPU</sub> | Os017901_01 | S7 | 0.737  | 0.000  | P | 349.923   | P | 583.327   | P | 365.702   | LOC_Os05g37970.1 |
| DG <sub>HPU</sub> | Os017943_01 | S7 | 0.000  | -1.776 | P | 371.370   | P | 282.131   | P | 966.233   | LOC_Os07g12340.1 |

|                   |             |    |        |        |   |           |   |          |   |           |                  |
|-------------------|-------------|----|--------|--------|---|-----------|---|----------|---|-----------|------------------|
| DG <sub>HPU</sub> | Os017944_01 | S7 | 0.000  | -1.536 | P | 791.184   | P | 648.894  | P | 1881.983  | LOC_Os04g18090.1 |
| DG <sub>HPU</sub> | Os018064_01 | S7 | -0.785 | -1.714 | P | 1154.132  | P | 669.854  | P | 2198.006  | LOC_Os05g48422.1 |
| DG <sub>HPU</sub> | Os018278_01 | S7 | 0.000  | -1.438 | P | 252.298   | P | 233.527  | P | 632.587   | LOC_Os10g35840.1 |
| DG <sub>HPU</sub> | Os018280_01 | S7 | -0.911 | 0.000  | P | 1765.406  | P | 939.092  | P | 962.365   | LOC_Os12g32940.1 |
| DG <sub>HPU</sub> | Os018393_01 | S7 | 0.000  | -1.533 | P | 247.150   | P | 211.930  | P | 613.461   | LOC_Os09g38090.1 |
| DG <sub>HPU</sub> | Os018465_01 | S7 | 0.000  | -1.399 | P | 198.069   | P | 162.364  | P | 428.296   | LOC_Os01g01710.1 |
| DG <sub>HPU</sub> | Os018550_01 | S7 | -1.483 | 0.000  | P | 9430.701  | P | 3372.812 | P | 4717.914  | LOC_Os06g08740.1 |
| DG <sub>HPU</sub> | Os018724_01 | S7 | -1.034 | 0.000  | P | 5351.230  | P | 2612.619 | P | 4956.745  | LOC_Os07g38270.1 |
| DG <sub>HPU</sub> | Os018737_01 | S7 | 0.839  | 0.000  | P | 1204.128  | P | 2154.694 | P | 1225.674  | LOC_Os02g39710.1 |
| DG <sub>HPU</sub> | Os018818_01 | S7 | 0.000  | -1.490 | P | 5180.402  | P | 5024.303 | P | 14114.904 | -                |
| DG <sub>HPU</sub> | Os018821_01 | S7 | -0.973 | 0.000  | P | 521.683   | P | 265.790  | P | 490.458   | LOC_Os07g06620.1 |
| DG <sub>HPU</sub> | Os018915_01 | S7 | -0.966 | 0.000  | P | 1057.662  | P | 541.288  | P | 560.327   | LOC_Os04g43760.1 |
| DG <sub>HPU</sub> | Os018960_01 | S7 | 0.000  | -1.569 | P | 672.619   | P | 472.087  | P | 1401.004  | LOC_Os03g52840.1 |
| DG <sub>HPU</sub> | Os019225_01 | S7 | -0.774 | 0.000  | P | 1753.338  | P | 1025.500 | P | 1032.328  | LOC_Os01g63930.2 |
| DG <sub>HPU</sub> | Os019289_01 | S7 | 0.855  | 0.000  | P | 119.602   | P | 216.334  | P | 199.827   | LOC_Os04g28420.1 |
| DG <sub>HPU</sub> | Os019437_01 | S7 | 0.731  | 0.000  | P | 131.956   | P | 219.083  | P | 262.584   | LOC_Os12g42260.2 |
| DG <sub>HPU</sub> | Os019511_01 | S7 | 0.000  | -1.640 | P | 345.968   | P | 301.988  | P | 940.903   | LOC_Os06g47350.2 |
| DG <sub>HPU</sub> | Os019620_01 | S7 | 0.000  | -1.688 | P | 420.471   | P | 273.540  | P | 881.449   | LOC_Os06g42720.1 |
| DG <sub>HPU</sub> | Os019785_01 | S7 | -1.336 | 0.000  | P | 10326.876 | P | 4089.308 | P | 5351.977  | LOC_Os02g55970.2 |
| DG <sub>HPU</sub> | Os020076_01 | S7 | 0.860  | 0.000  | P | 580.050   | P | 1052.967 | P | 1058.893  | LOC_Os08g39380.1 |
| DG <sub>HPU</sub> | Os020229_01 | S7 | 0.846  | 0.000  | P | 1218.666  | P | 2190.831 | P | 1719.900  | LOC_Os05g02250.2 |
| DG <sub>HPU</sub> | Os020320_01 | S7 | 0.000  | -1.494 | P | 3874.358  | P | 3589.021 | P | 10107.778 | LOC_Os10g05690.1 |
| DG <sub>HPU</sub> | Os020373_01 | S7 | 1.005  | 0.000  | P | 354.841   | P | 712.009  | P | 261.800   | LOC_Os04g27980.1 |
| DG <sub>HPU</sub> | Os020523_01 | S7 | -0.791 | 0.000  | P | 587.289   | P | 339.362  | P | 390.525   | LOC_Os02g55080.1 |
| DG <sub>HPU</sub> | Os020653_01 | S7 | 0.000  | -1.375 | P | 169.845   | P | 177.736  | P | 461.143   | LOC_Os11g05990.1 |
| DG <sub>HPU</sub> | Os020778_01 | S7 | 0.797  | 0.000  | P | 492.139   | P | 855.151  | P | 345.206   | LOC_Os07g44430.2 |
| DG <sub>HPU</sub> | Os020841_01 | S7 | -1.213 | 0.000  | P | 1253.846  | P | 540.839  | P | 649.380   | LOC_Os05g06500.1 |
| DG <sub>HPU</sub> | Os020948_01 | S7 | -0.793 | 0.000  | P | 279.516   | P | 161.265  | P | 181.969   | LOC_Os04g46880.2 |
| DG <sub>HPU</sub> | Os020966_01 | S7 | 0.000  | 1.647  | P | 660.053   | P | 822.362  | P | 262.588   | LOC_Os03g55350.1 |
| DG <sub>HPU</sub> | Os021029_01 | S7 | 0.943  | 0.000  | P | 155.887   | P | 299.654  | P | 247.367   | LOC_Os01g10930.1 |
| DG <sub>HPU</sub> | Os021076_01 | S7 | 1.048  | 0.000  | P | 231.266   | P | 478.139  | P | 313.602   | LOC_Os01g03110.1 |

|                   |             |    |        |        |   |          |   |          |   |          |                  |
|-------------------|-------------|----|--------|--------|---|----------|---|----------|---|----------|------------------|
| DG <sub>HPU</sub> | Os021113_01 | S7 | -0.977 | 0.000  | P | 607.993  | P | 308.860  | P | 415.575  | LOC_Os02g15700.1 |
| DG <sub>HPU</sub> | Os021296_01 | S7 | 1.030  | 0.000  | P | 2333.350 | P | 4763.519 | P | 2766.301 | LOC_Os03g19780.1 |
| DG <sub>HPU</sub> | Os021314_01 | S7 | 0.818  | 0.000  | P | 996.491  | P | 1756.535 | P | 986.917  | LOC_Os07g42290.1 |
| DG <sub>HPU</sub> | Os021349_01 | S7 | 0.000  | 1.717  | P | 1016.798 | P | 1109.166 | P | 337.380  | LOC_Os02g54160.1 |
| DG <sub>HPU</sub> | Os021383_01 | S7 | 1.083  | 0.000  | P | 748.631  | P | 1585.444 | P | 652.661  | LOC_Os03g54910.1 |
| DG <sub>HPU</sub> | Os021429_01 | S7 | 0.000  | -1.931 | A | 46.641   | P | 152.566  | P | 581.962  | LOC_Os12g20390.4 |
| DG <sub>HPU</sub> | Os021455_01 | S7 | 0.000  | -1.467 | A | 112.635  | P | 166.291  | P | 459.617  | LOC_Os03g55820.1 |
| DG <sub>HPU</sub> | Os021521_01 | S7 | 0.000  | -2.044 | A | 112.666  | P | 163.332  | P | 673.414  | LOC_Os01g03490.1 |
| DG <sub>HPU</sub> | Os021757_01 | S7 | -0.793 | 0.000  | P | 3282.352 | P | 1893.929 | P | 1736.760 | LOC_Os09g36740.1 |
| DG <sub>HPU</sub> | Os021798_01 | S7 | 0.000  | -1.676 | P | 228.684  | P | 173.145  | P | 553.397  | LOC_Os11g08380.1 |
| DG <sub>HPU</sub> | Os021834_01 | S7 | 0.898  | 0.000  | P | 2088.164 | P | 3891.696 | P | 2085.880 | LOC_Os08g27720.1 |
| DG <sub>HPU</sub> | Os021893_01 | S7 | 0.000  | -1.733 | P | 159.845  | P | 128.828  | P | 428.397  | LOC_Os09g35030.1 |
| DG <sub>HPU</sub> | Os021895_01 | S7 | -0.828 | 0.000  | P | 293.590  | P | 165.402  | P | 407.469  | LOC_Os08g28180.2 |
| DG <sub>HPU</sub> | Os021896_01 | S7 | -0.827 | 0.000  | P | 366.804  | P | 206.765  | P | 158.854  | LOC_Os01g47780.1 |
| DG <sub>HPU</sub> | Os021978_01 | S7 | 0.000  | -1.612 | P | 291.726  | P | 200.766  | P | 613.831  | LOC_Os02g39160.1 |
| DG <sub>HPU</sub> | Os022055_01 | S7 | -0.946 | 0.000  | P | 8427.329 | P | 4373.315 | P | 9498.371 | LOC_Os11g07020.1 |
| DG <sub>HPU</sub> | Os022057_01 | S7 | 0.742  | 0.000  | P | 209.797  | P | 350.862  | P | 303.742  | LOC_Os01g10850.1 |
| DG <sub>HPU</sub> | Os022072_01 | S7 | 0.000  | -1.694 | P | 177.871  | P | 143.776  | P | 465.281  | LOC_Os06g49880.1 |
| DG <sub>HPU</sub> | Os022074_01 | S7 | -1.000 | 0.000  | P | 1996.941 | P | 998.255  | P | 1835.438 | LOC_Os06g15400.1 |
| DG <sub>HPU</sub> | Os022083_01 | S7 | -0.930 | -1.856 | P | 669.457  | P | 351.386  | P | 1271.622 | LOC_Os03g63280.1 |
| DG <sub>HPU</sub> | Os022142_01 | S7 | 0.000  | -1.525 | P | 364.396  | P | 333.165  | P | 958.592  | LOC_Os09g31200.1 |
| DG <sub>HPU</sub> | Os022183_01 | S7 | 0.000  | -1.405 | P | 498.234  | P | 295.122  | P | 781.301  | LOC_Os10g40390.1 |
| DG <sub>HPU</sub> | Os022228_01 | S7 | -1.555 | 0.000  | P | 5429.930 | P | 1847.845 | P | 2621.709 | LOC_Os10g41250.1 |
| DG <sub>HPU</sub> | Os022434_01 | S7 | -1.524 | 0.000  | P | 3601.769 | P | 1252.482 | P | 1975.860 | LOC_Os01g67310.1 |
| DG <sub>HPU</sub> | Os022652_01 | S7 | 0.000  | -1.665 | A | 103.612  | P | 121.980  | P | 386.810  | LOC_Os02g18750.1 |
| DG <sub>HPU</sub> | Os022779_01 | S7 | -0.793 | 0.000  | P | 1210.720 | P | 698.932  | P | 434.590  | -                |
| DG <sub>HPU</sub> | Os022953_01 | S7 | 0.789  | 0.000  | P | 980.090  | P | 1693.218 | P | 1467.030 | LOC_Os09g38850.1 |
| DG <sub>HPU</sub> | Os022978_01 | S7 | 0.753  | 0.000  | P | 342.212  | P | 576.584  | P | 528.535  | LOC_Os01g49260.1 |
| DG <sub>HPU</sub> | Os022995_01 | S7 | 0.791  | 0.000  | P | 5148.264 | P | 8909.723 | P | 3611.368 | LOC_Os07g11330.1 |
| DG <sub>HPU</sub> | Os023000_01 | S7 | 0.860  | 0.000  | P | 537.186  | P | 975.199  | P | 826.655  | LOC_Os03g26010.1 |
| DG <sub>HPU</sub> | Os023001_01 | S7 | 0.875  | 0.000  | P | 1941.946 | P | 3561.228 | P | 3782.130 | LOC_Os10g40040.1 |

|                   |             |    |        |        |   |          |   |          |   |          |                  |
|-------------------|-------------|----|--------|--------|---|----------|---|----------|---|----------|------------------|
| DG <sub>HPU</sub> | Os023012_01 | S7 | 0.743  | 0.000  | P | 896.316  | P | 1500.277 | P | 1005.184 | LOC_Os09g26380.1 |
| DG <sub>HPU</sub> | Os023026_01 | S7 | 0.862  | 0.000  | P | 793.191  | P | 1441.784 | P | 1188.416 | LOC_Os07g02910.1 |
| DG <sub>HPU</sub> | Os023028_01 | S7 | 0.768  | 0.000  | P | 599.060  | P | 1020.334 | P | 378.965  | LOC_Os05g49930.1 |
| DG <sub>HPU</sub> | Os023032_01 | S7 | 0.776  | 0.000  | P | 107.553  | P | 184.140  | P | 121.672  | LOC_Os04g32070.1 |
| DG <sub>HPU</sub> | Os023038_01 | S7 | 1.374  | 0.000  | P | 112.811  | P | 292.470  | P | 135.079  | LOC_Os04g35000.1 |
| DG <sub>HPU</sub> | Os023048_01 | S7 | 0.000  | 1.663  | P | 2109.018 | P | 2767.888 | P | 874.144  | LOC_Os02g12310.1 |
| DG <sub>HPU</sub> | Os023065_01 | S7 | 0.761  | 0.000  | P | 2338.927 | P | 3962.624 | P | 2752.288 | LOC_Os01g20120.1 |
| DG <sub>HPU</sub> | Os023116_01 | S7 | -0.912 | -1.812 | P | 942.420  | P | 500.758  | P | 1757.960 | -                |
| DG <sub>HPU</sub> | Os023156_01 | S7 | 0.000  | 1.779  | P | 550.269  | P | 688.292  | P | 200.553  | LOC_Os03g45210.1 |
| DG <sub>HPU</sub> | Os023215_01 | S7 | -1.083 | 0.000  | P | 4524.381 | P | 2135.903 | P | 2595.244 | -                |
| DG <sub>HPU</sub> | Os023465_01 | S7 | 1.473  | 0.000  | P | 293.866  | P | 815.606  | P | 734.852  | LOC_Os01g37200.1 |
| DG <sub>HPU</sub> | Os023481_02 | S7 | 0.993  | 0.000  | P | 2867.779 | P | 5708.990 | P | 2669.547 | -                |
| DG <sub>HPU</sub> | Os023486_01 | S7 | 0.873  | 0.000  | P | 208.411  | P | 381.642  | P | 169.628  | -                |
| DG <sub>HPU</sub> | Os023530_01 | S7 | 1.511  | 1.505  | P | 448.274  | P | 1277.790 | P | 450.061  | LOC_Os07g12080.1 |
| DG <sub>HPU</sub> | Os023575_01 | S7 | 1.066  | 0.000  | P | 115.645  | P | 242.148  | P | 178.570  | LOC_Os08g23870.1 |
| DG <sub>HPU</sub> | Os023578_01 | S7 | 1.022  | 0.000  | P | 214.912  | P | 436.478  | P | 268.000  | LOC_Os04g38550.1 |
| DG <sub>HPU</sub> | Os023631_01 | S7 | 0.000  | 1.503  | P | 452.985  | P | 524.211  | P | 185.004  | LOC_Os02g57350.1 |
| DG <sub>HPU</sub> | Os023651_01 | S7 | 0.830  | 0.000  | P | 194.854  | P | 346.273  | A | 112.480  | LOC_Os03g58500.1 |
| DG <sub>HPU</sub> | Os023673_01 | S7 | 0.743  | 0.000  | P | 174.428  | P | 291.936  | P | 193.702  | LOC_Os08g15420.1 |
| DG <sub>HPU</sub> | Os023737_01 | S7 | 0.939  | 0.000  | P | 1442.170 | P | 2764.298 | P | 1247.053 | -                |
| DG <sub>HPU</sub> | Os023820_01 | S7 | 0.000  | 1.735  | P | 2361.229 | P | 3376.155 | P | 1013.981 | LOC_Os07g42390.1 |
| DG <sub>HPU</sub> | Os023849_01 | S7 | -0.923 | 0.000  | P | 548.813  | P | 289.361  | P | 294.258  | LOC_Os10g25400.1 |
| DG <sub>HPU</sub> | Os023957_01 | S7 | 0.846  | 0.000  | P | 121.516  | P | 218.383  | A | 97.736   | LOC_Os05g50110.1 |
| DG <sub>HPU</sub> | Os024239_01 | S7 | 0.000  | 1.679  | P | 886.662  | P | 1320.816 | P | 412.472  | LOC_Os07g38290.1 |
| DG <sub>HPU</sub> | Os024417_01 | S7 | 0.873  | 0.000  | P | 5049.477 | P | 9245.212 | P | 4092.799 | LOC_Os01g13340.1 |
| DG <sub>HPU</sub> | Os024437_01 | S7 | -1.082 | 0.000  | P | 3510.529 | P | 1658.317 | P | 3511.670 | -                |
| DG <sub>HPU</sub> | Os024540_01 | S7 | -0.827 | 0.000  | P | 510.908  | P | 288.075  | P | 258.625  | -                |
| DG <sub>HPU</sub> | Os024624_01 | S7 | 0.855  | 0.000  | P | 1277.143 | P | 2310.017 | P | 1689.231 | LOC_Os04g58820.1 |
| DG <sub>HPU</sub> | Os024704_01 | S7 | 1.013  | 0.000  | P | 1648.329 | P | 3327.527 | P | 1685.406 | -                |
| DG <sub>HPU</sub> | Os024798_01 | S7 | 0.000  | -1.384 | P | 258.756  | P | 260.015  | P | 678.516  | LOC_Os05g48800.2 |
| DG <sub>HPU</sub> | Os024827_01 | S7 | 0.000  | -1.452 | P | 208.753  | P | 207.402  | P | 567.465  | -                |



|                   |             |    |        |        |   |           |   |           |   |           |                  |
|-------------------|-------------|----|--------|--------|---|-----------|---|-----------|---|-----------|------------------|
| DG <sub>HPU</sub> | Os024959_01 | S7 | 0.000  | -1.517 | P | 191.261   | P | 159.817   | P | 457.493   | LOC_Os02g08150.1 |
| DG <sub>HPU</sub> | Os025052_01 | S7 | 0.753  | 0.000  | P | 2510.627  | P | 4230.885  | P | 1843.976  | LOC_Os01g56570.1 |
| DG <sub>HPU</sub> | Os025101_01 | S7 | 0.000  | 1.726  | P | 1796.991  | P | 1982.433  | P | 599.219   | LOC_Os08g31660.1 |
| DG <sub>HPU</sub> | Os025108_01 | S7 | 0.810  | 1.528  | P | 689.944   | P | 1209.326  | P | 419.367   | LOC_Os11g24790.1 |
| DG <sub>HPU</sub> | Os025168_01 | S7 | -1.094 | 0.000  | P | 292.135   | P | 136.900   | A | 92.106    | LOC_Os08g40280.1 |
| DG <sub>HPU</sub> | Os025567_01 | S7 | 0.728  | 0.000  | P | 487.462   | P | 807.522   | P | 618.645   | LOC_Os11g28270.3 |
| DG <sub>HPU</sub> | Os025779_01 | S7 | 0.723  | 0.000  | P | 224.336   | P | 370.320   | P | 283.342   | LOC_Os01g74590.1 |
| DG <sub>HPU</sub> | Os025968_01 | S7 | -0.831 | 0.000  | P | 1839.468  | P | 1034.119  | P | 755.516   | LOC_Os08g16780.1 |
| DG <sub>HPU</sub> | Os026060_01 | S7 | 1.158  | 0.000  | P | 299.976   | P | 669.425   | P | 463.412   | -                |
| DG <sub>HPU</sub> | Os026911_01 | S7 | 0.000  | 1.516  | P | 449.958   | P | 630.898   | P | 220.536   | LOC_Os03g20590.1 |
| DG <sub>HPU</sub> | Os026917_01 | S7 | -1.026 | 0.000  | P | 3092.747  | P | 1518.986  | P | 1380.473  | LOC_Os04g52250.1 |
| DG <sub>HPU</sub> | Os027044_01 | S7 | -1.165 | 0.000  | P | 8415.915  | P | 3752.137  | P | 6353.651  | LOC_Os09g15830.1 |
| DG <sub>HPU</sub> | Os027596_01 | S7 | 0.798  | 0.000  | P | 23728.958 | P | 41268.138 | P | 24813.159 | LOC_Os05g41970.1 |
| DG <sub>HPU</sub> | Os027629_01 | S7 | -0.789 | 0.000  | P | 1847.534  | P | 1069.017  | P | 2406.418  | -                |
| DG <sub>HPU</sub> | Os027637_01 | S7 | -0.919 | 0.000  | P | 3837.045  | P | 2029.774  | P | 3181.002  | LOC_Os05g04510.2 |
| DG <sub>HPU</sub> | Os027666_01 | S7 | 1.049  | 0.000  | P | 12365.158 | P | 25581.721 | P | 12490.756 | LOC_Os07g11380.1 |
| DG <sub>HPU</sub> | Os027667_01 | S7 | -0.787 | 0.000  | P | 1373.746  | P | 796.361   | P | 462.359   | LOC_Os10g40430.1 |
| DG <sub>HPU</sub> | Os027740_01 | S7 | 0.000  | -1.470 | P | 773.171   | P | 714.802   | P | 1980.040  | LOC_Os09g29690.1 |
| DG <sub>HPU</sub> | Os027832_01 | S7 | 1.127  | 0.000  | P | 143.989   | P | 314.473   | P | 257.046   | LOC_Os02g46530.1 |
| DG <sub>HPU</sub> | Os027938_01 | S7 | -1.144 | 0.000  | P | 1611.928  | P | 729.153   | P | 620.488   | -                |
| DG <sub>HPU</sub> | Os028025_01 | S7 | 1.006  | 0.000  | P | 499.230   | P | 1002.433  | P | 582.846   | LOC_Os05g07240.1 |
| DG <sub>HPU</sub> | Os028141_01 | S7 | 1.003  | 0.000  | P | 1297.422  | P | 2599.770  | P | 1427.984  | LOC_Os09g20520.1 |
| DG <sub>HPU</sub> | Os028173_01 | S7 | 0.000  | 1.785  | P | 879.729   | P | 1074.268  | P | 311.734   | LOC_Os04g29290.1 |
| DG <sub>HPU</sub> | Os028175_01 | S7 | 0.000  | 1.761  | P | 1396.592  | P | 1790.608  | P | 528.455   | LOC_Os11g30830.1 |
| DG <sub>HPU</sub> | Os028183_01 | S7 | 0.000  | 2.006  | P | 835.616   | P | 1135.777  | P | 282.784   | LOC_Os05g48400.1 |
| DG <sub>HPU</sub> | Os028190_01 | S7 | 0.736  | 0.000  | P | 195.047   | P | 324.955   | A | 66.606    | LOC_Os11g31380.1 |
| DG <sub>HPU</sub> | Os028201_01 | S7 | -0.852 | 0.000  | P | 406.755   | P | 225.366   | A | 43.560    | LOC_Os07g07180.1 |
| DG <sub>HPU</sub> | Os028382_01 | S7 | 0.760  | 0.000  | P | 130.619   | P | 221.156   | P | 285.268   | LOC_Os06g02580.1 |
| DG <sub>HPU</sub> | Os028477_01 | S7 | 0.773  | 0.000  | P | 108.124   | P | 184.761   | P | 218.058   | LOC_Os02g45330.1 |
| DG <sub>HPU</sub> | Os028578_01 | S7 | -1.002 | 0.000  | P | 364.050   | P | 181.775   | A | 80.988    | LOC_Os07g32370.1 |
| DG <sub>HPU</sub> | Os028680_01 | S7 | 0.000  | -1.923 | A | 92.016    | P | 174.957   | P | 663.626   | LOC_Os07g06100.1 |

|                   |             |    |        |        |   |           |   |           |   |           |                  |
|-------------------|-------------|----|--------|--------|---|-----------|---|-----------|---|-----------|------------------|
| DG <sub>HPU</sub> | Os029205_01 | S7 | 0.000  | 1.571  | P | 979.282   | P | 1321.747  | P | 444.874   | LOC_Os05g39400.1 |
| DG <sub>HPU</sub> | Os029315_01 | S7 | 1.298  | 2.499  | P | 396.169   | P | 974.330   | P | 172.313   | LOC_Os07g30680.1 |
| DG <sub>HPU</sub> | Os029431_01 | S7 | 0.807  | 0.000  | P | 178.987   | P | 313.153   | P | 192.509   | LOC_Os08g08790.1 |
| DG <sub>HPU</sub> | Os029535_01 | S7 | 0.000  | -1.515 | P | 2284.679  | P | 1553.371  | P | 4439.250  | LOC_Os06g19770.1 |
| DG <sub>HPU</sub> | Os029666_01 | S7 | 0.875  | 0.000  | P | 192.940   | P | 353.850   | P | 472.623   | LOC_Os05g05610.1 |
| DG <sub>HPU</sub> | Os029812_01 | S7 | -1.505 | 0.000  | P | 771.530   | P | 271.860   | P | 372.082   | -                |
| DG <sub>HPU</sub> | Os029952_01 | S7 | 0.763  | 0.000  | P | 196.236   | P | 333.128   | P | 214.943   | LOC_Os08g33190.1 |
| DG <sub>HPU</sub> | Os030231_01 | S7 | 0.939  | 0.000  | P | 538.338   | P | 1032.435  | P | 928.888   | LOC_Os03g46100.1 |
| DG <sub>HPU</sub> | Os030546_01 | S7 | -0.804 | 0.000  | P | 717.667   | P | 411.027   | P | 296.603   | LOC_Os09g16270.1 |
| DG <sub>HPU</sub> | Os030891_01 | S7 | -1.015 | 0.000  | P | 1052.236  | P | 520.677   | P | 504.242   | LOC_Os02g41954.1 |
| DG <sub>HPU</sub> | Os030952_01 | S7 | 0.000  | 1.796  | P | 438.482   | P | 692.971   | P | 199.557   | -                |
| DG <sub>HPU</sub> | Os031048_01 | S7 | 0.966  | 0.000  | P | 4536.729  | P | 8860.520  | P | 4186.843  | LOC_Os06g19490.1 |
| DG <sub>HPU</sub> | Os031090_01 | S7 | -1.100 | 0.000  | P | 5399.325  | P | 2519.514  | P | 6110.440  | LOC_Os12g14699.1 |
| DG <sub>HPU</sub> | Os031487_01 | S7 | 0.965  | 0.000  | P | 7722.115  | P | 15069.210 | P | 10439.004 | LOC_Os04g53650.1 |
| DG <sub>HPU</sub> | Os031781_01 | S7 | -0.823 | 0.000  | P | 14201.805 | P | 8028.355  | P | 5330.768  | LOC_Os06g30530.1 |
| DG <sub>HPU</sub> | Os032146_01 | S7 | 0.941  | 0.000  | P | 171.239   | P | 328.753   | P | 211.904   | LOC_Os10g10620.1 |
| DG <sub>HPU</sub> | Os032194_01 | S7 | 0.000  | -1.826 | P | 1608.363  | P | 946.726   | P | 3356.807  | LOC_Os08g43530.1 |
| DG <sub>HPU</sub> | Os032197_01 | S7 | 1.155  | 0.000  | P | 308.132   | P | 686.149   | P | 440.541   | LOC_Os11g26570.1 |
| DG <sub>HPU</sub> | Os032413_01 | S7 | -0.794 | 0.000  | P | 612.283   | P | 353.115   | P | 397.793   | LOC_Os01g11500.1 |
| DG <sub>HPU</sub> | Os032673_01 | S7 | 0.000  | 1.495  | P | 1041.247  | P | 1475.264  | P | 523.244   | LOC_Os08g12810.1 |
| DG <sub>HPU</sub> | Os033186_01 | S7 | 0.749  | 1.756  | P | 507.100   | P | 852.405   | P | 252.340   | LOC_Os01g39850.1 |
| DG <sub>HPU</sub> | Os033199_01 | S7 | 0.798  | 0.000  | P | 169.754   | P | 295.195   | P | 326.179   | -                |
| DG <sub>HPU</sub> | Os033395_01 | S7 | 0.734  | 0.000  | P | 2835.707  | P | 4717.836  | P | 2035.913  | -                |
| DG <sub>HPU</sub> | Os033430_01 | S7 | 0.000  | -2.150 | A | 32.896    | P | 202.470   | P | 898.396   | LOC_Os10g22630.1 |
| DG <sub>HPU</sub> | Os033574_01 | S7 | 0.843  | 0.000  | P | 6436.009  | P | 11544.961 | P | 4638.252  | LOC_Os08g41760.1 |
| DG <sub>HPU</sub> | Os034009_01 | S7 | 0.820  | 0.000  | P | 17379.337 | P | 30689.347 | P | 19140.097 | LOC_Os02g38170.1 |
| DG <sub>HPU</sub> | Os034378_01 | S7 | -0.989 | 0.000  | P | 734.684   | P | 370.150   | P | 303.103   | LOC_Os03g18000.1 |
| DG <sub>HPU</sub> | Os034493_01 | S7 | 0.000  | 1.496  | P | 955.275   | P | 1158.528  | P | 410.672   | LOC_Os02g34930.1 |
| DG <sub>HPU</sub> | Os034598_01 | S7 | 0.000  | -1.465 | P | 866.699   | P | 651.358   | P | 1798.476  | LOC_Os05g23050.1 |
| DG <sub>HPU</sub> | Os034660_01 | S7 | -0.875 | 0.000  | P | 573.396   | P | 312.583   | P | 231.763   | LOC_Os05g11470.1 |
| DG <sub>HPU</sub> | Os034971_01 | S7 | 0.736  | 0.000  | P | 2786.374  | P | 4640.282  | P | 1781.033  | LOC_Os01g56040.1 |

|                   |             |    |        |        |   |           |   |           |   |           |                  |
|-------------------|-------------|----|--------|--------|---|-----------|---|-----------|---|-----------|------------------|
| DG <sub>HPU</sub> | Os035128_01 | S7 | 1.068  | 0.000  | P | 209.243   | P | 438.708   | P | 239.290   | LOC_Os05g46060.1 |
| DG <sub>HPU</sub> | Os035182_01 | S7 | -0.922 | 0.000  | P | 1912.353  | P | 1009.115  | P | 1340.808  | LOC_Os01g08200.1 |
| DG <sub>HPU</sub> | Os035205_01 | S7 | 0.936  | 0.000  | P | 7003.911  | P | 13397.472 | P | 9530.806  | LOC_Os07g12720.1 |
| DG <sub>HPU</sub> | Os035328_01 | S7 | 0.843  | 0.000  | P | 9986.336  | P | 17916.090 | P | 8135.661  | LOC_Os06g50980.1 |
| DG <sub>HPU</sub> | Os035490_01 | S7 | -0.852 | 0.000  | P | 777.138   | P | 430.634   | P | 465.607   | LOC_Os12g04424.2 |
| DG <sub>HPU</sub> | Os035558_01 | S7 | -1.042 | 0.000  | P | 7213.652  | P | 3502.142  | P | 8611.043  | LOC_Os06g47360.1 |
| DG <sub>HPU</sub> | Os035573_01 | S7 | -0.916 | 0.000  | P | 305.708   | P | 162.042   | P | 147.780   | LOC_Os02g40610.1 |
| DG <sub>HPU</sub> | Os035905_01 | S7 | 0.000  | -1.644 | A | 179.231   | P | 191.618   | P | 598.912   | LOC_Os11g39020.1 |
| DG <sub>HPU</sub> | Os036341_01 | S7 | -0.939 | 0.000  | P | 501.061   | P | 261.298   | A | 44.692    | LOC_Os07g05510.1 |
| DG <sub>HPU</sub> | Os036348_01 | S7 | 0.000  | -1.696 | P | 1372.813  | P | 821.587   | P | 2661.902  | LOC_Os12g14450.1 |
| DG <sub>HPU</sub> | Os036475_01 | S7 | 0.000  | 1.681  | P | 211.679   | P | 301.981   | P | 94.191    | LOC_Os03g08530.1 |
| DG <sub>HPU</sub> | Os036618_01 | S7 | -1.167 | -2.546 | P | 1299.993  | P | 579.051   | P | 3380.930  | LOC_Os04g33830.1 |
| DG <sub>HPU</sub> | Os036667_01 | S7 | 0.902  | 0.000  | P | 10419.138 | P | 19476.243 | P | 11456.906 | LOC_Os06g08500.1 |
| DG <sub>HPU</sub> | Os037049_01 | S7 | -1.106 | -1.531 | P | 1059.506  | P | 492.280   | P | 1422.948  | LOC_Os08g17980.1 |
| DG <sub>HPU</sub> | Os037099_01 | S7 | 0.874  | 0.000  | P | 5024.746  | P | 9207.879  | P | 4403.780  | LOC_Os04g42530.1 |
| DG <sub>HPU</sub> | Os037112_01 | S7 | 0.000  | -1.484 | P | 318.744   | P | 288.628   | P | 807.248   | LOC_Os11g01360.1 |
| DG <sub>HPU</sub> | Os037211_01 | S7 | 0.730  | 0.000  | P | 1033.848  | P | 1714.540  | P | 1041.623  | LOC_Os09g03580.1 |
| DG <sub>HPU</sub> | Os037237_01 | S7 | -0.892 | 0.000  | P | 1069.670  | P | 576.282   | P | 493.551   | LOC_Os01g04470.1 |
| DG <sub>HPU</sub> | Os037668_01 | S7 | 0.724  | 0.000  | P | 4235.256  | P | 6997.747  | P | 4946.118  | LOC_Os04g40120.1 |
| DG <sub>HPU</sub> | Os037985_01 | S7 | -1.987 | -1.710 | P | 12507.388 | P | 3155.151  | P | 10321.336 | LOC_Os12g10580.1 |
| DG <sub>HPU</sub> | Os038150_01 | S7 | 0.000  | -1.724 | P | 299.794   | P | 208.957   | P | 690.136   | LOC_Os06g20710.1 |
| DG <sub>HPU</sub> | Os038339_01 | S7 | 0.725  | 0.000  | P | 128.354   | P | 212.140   | P | 154.007   | LOC_Os03g49840.1 |
| DG <sub>HPU</sub> | Os038408_01 | S7 | -1.721 | 0.000  | P | 7476.677  | P | 2267.848  | P | 2674.603  | LOC_Os09g25700.1 |
| DG <sub>HPU</sub> | Os038439_01 | S7 | 0.000  | 1.498  | P | 383.201   | P | 427.568   | P | 151.403   | LOC_Os05g50390.1 |
| DG <sub>HPU</sub> | Os039127_01 | S7 | 0.000  | 1.903  | P | 445.112   | P | 549.984   | P | 147.080   | LOC_Os01g48170.1 |
| DG <sub>HPU</sub> | Os039406_01 | S7 | 0.833  | 0.000  | P | 173.313   | P | 308.781   | P | 187.247   | LOC_Os03g20680.1 |
| DG <sub>HPU</sub> | Os039702_01 | S7 | -0.826 | -1.516 | P | 363.297   | P | 204.915   | P | 585.871   | LOC_Os11g25300.1 |
| DG <sub>HPU</sub> | Os040088_01 | S7 | -0.828 | 0.000  | P | 1208.374  | P | 680.753   | P | 766.627   | -                |
| DG <sub>HPU</sub> | Os040337_01 | S7 | 0.905  | 1.561  | P | 280.984   | P | 526.206   | P | 178.354   | -                |
| DG <sub>HPU</sub> | Os040346_01 | S7 | -0.786 | 0.000  | P | 415.143   | P | 240.844   | P | 572.696   | LOC_Os01g46210.1 |
| DG <sub>HPU</sub> | Os040497_01 | S7 | -1.066 | 0.000  | P | 525.689   | P | 251.095   | P | 175.123   | LOC_Os12g41420.1 |

|                   |             |    |        |        |   |           |   |           |   |           |                  |
|-------------------|-------------|----|--------|--------|---|-----------|---|-----------|---|-----------|------------------|
| DG <sub>HPU</sub> | Os040589_01 | S7 | 0.000  | -1.561 | P | 415.237   | P | 321.025   | P | 946.981   | LOC_Os03g17070.1 |
| DG <sub>HPU</sub> | Os040591_01 | S7 | 0.000  | -1.448 | A | 117.117   | P | 147.896   | P | 403.629   | LOC_Os03g08380.1 |
| DG <sub>HPU</sub> | Os040834_01 | S7 | 0.760  | 0.000  | P | 3662.756  | P | 6201.290  | P | 3523.019  | LOC_Os11g01260.1 |
| DG <sub>HPU</sub> | Os040991_01 | S7 | 0.826  | 0.000  | P | 12517.626 | P | 22186.318 | P | 10873.089 | -                |
| DG <sub>HPU</sub> | Os041080_01 | S7 | 0.772  | 0.000  | P | 4720.505  | P | 8061.607  | P | 3567.106  | LOC_Os03g19830.1 |
| DG <sub>HPU</sub> | Os041081_01 | S7 | 0.000  | 1.754  | A | 613.151   | P | 520.487   | P | 154.286   | -                |
| DG <sub>HPU</sub> | Os041334_01 | S7 | 1.343  | 0.000  | P | 160.892   | P | 408.171   | P | 212.416   | LOC_Os01g13920.1 |
| DG <sub>HPU</sub> | Os041337_01 | S7 | 0.000  | 1.774  | P | 758.797   | P | 1015.515  | P | 296.860   | LOC_Os04g05490.1 |
| DG <sub>HPU</sub> | Os042492_01 | S7 | -0.922 | 0.000  | P | 1831.974  | P | 967.025   | P | 1695.243  | -                |
| DG <sub>HPU</sub> | Os043044_01 | S7 | 0.745  | 0.000  | P | 1087.828  | P | 1823.247  | P | 1203.620  | LOC_Os06g30030.1 |
| DG <sub>HPU</sub> | Os043604_01 | S7 | 0.923  | 0.000  | P | 713.714   | P | 1353.062  | P | 647.083   | LOC_Os05g20030.1 |
| DG <sub>HPU</sub> | Os043740_01 | S7 | -1.252 | 0.000  | P | 2775.095  | P | 1165.046  | P | 2687.506  | LOC_Os04g11956.1 |
| DG <sub>HPU</sub> | Os043891_01 | S7 | 0.000  | 1.584  | P | 793.912   | P | 942.129   | P | 314.199   | LOC_Os06g44910.1 |
| DG <sub>HPU</sub> | Os043937_01 | S7 | 0.884  | 0.000  | P | 178.656   | P | 329.693   | P | 171.244   | LOC_Os06g29580.1 |
| DG <sub>HPU</sub> | Os043992_01 | S7 | -0.932 | 0.000  | P | 393.899   | P | 206.421   | P | 131.918   | LOC_Os06g16000.1 |
| DG <sub>HPU</sub> | Os044015_01 | S7 | 1.040  | 0.000  | P | 112.265   | P | 230.780   | A | 98.268    | -                |
| DG <sub>HPU</sub> | Os044300_01 | S7 | -0.946 | 0.000  | P | 2796.805  | P | 1451.286  | P | 1626.258  | LOC_Os05g11320.1 |
| DG <sub>HPU</sub> | Os044441_01 | S7 | 1.142  | 0.000  | P | 122.889   | P | 271.294   | P | 176.744   | LOC_Os12g41790.1 |
| DG <sub>HPU</sub> | Os044617_01 | S7 | 1.033  | 0.000  | P | 2836.121  | P | 5802.960  | P | 3099.138  | -                |
| DG <sub>HPU</sub> | Os045253_01 | S7 | 0.000  | -1.441 | A | 110.868   | P | 122.101   | P | 331.587   | -                |
| DG <sub>HPU</sub> | Os045398_01 | S7 | 0.846  | 0.000  | P | 1067.149  | P | 1918.613  | P | 959.517   | LOC_Os12g25450.1 |
| DG <sub>HPU</sub> | Os045558_01 | S7 | -0.894 | 0.000  | P | 461.420   | P | 248.281   | P | 220.396   | LOC_Os07g34370.1 |
| DG <sub>HPU</sub> | Os045632_01 | S7 | -1.008 | 0.000  | P | 6474.088  | P | 3219.421  | P | 5329.558  | LOC_Os07g18070.1 |
| DG <sub>HPU</sub> | Os045859_01 | S7 | 0.000  | -2.142 | A | 91.336    | P | 140.121   | P | 618.263   | LOC_Os12g28177.1 |
| DG <sub>HPU</sub> | Os046675_01 | S7 | 1.033  | 0.000  | P | 223.772   | P | 457.907   | P | 170.863   | LOC_Os11g39020.1 |
| DG <sub>HPU</sub> | Os046837_01 | S7 | -0.965 | 0.000  | P | 530.604   | P | 271.819   | P | 237.798   | LOC_Os06g46650.1 |
| DG <sub>HPU</sub> | Os047258_01 | S7 | 0.000  | -1.395 | P | 462.797   | P | 395.470   | P | 1040.217  | LOC_Os03g37290.1 |
| DG <sub>HPU</sub> | Os047694_01 | S7 | -0.972 | 0.000  | P | 276.638   | P | 140.991   | A | 123.844   | LOC_Os04g30540.1 |
| DG <sub>HPU</sub> | Os047874_01 | S7 | 0.000  | -1.645 | P | 1148.324  | P | 690.674   | P | 2159.483  | LOC_Os12g36860.1 |
| DG <sub>HPU</sub> | Os048007_01 | S7 | 0.752  | 0.000  | P | 883.333   | P | 1487.875  | P | 618.742   | LOC_Os11g42050.1 |
| DG <sub>HPU</sub> | Os048058_01 | S7 | 0.941  | 0.000  | P | 6090.055  | P | 11692.110 | P | 5762.127  | LOC_Os11g18000.1 |

|                   |             |    |        |        |   |           |   |           |   |           |                  |
|-------------------|-------------|----|--------|--------|---|-----------|---|-----------|---|-----------|------------------|
| DG <sub>HPU</sub> | Os048353_01 | S7 | 0.866  | 0.000  | P | 159.935   | P | 291.592   | P | 193.619   | LOC_Os04g57400.1 |
| DG <sub>HPU</sub> | Os048485_01 | S7 | 0.992  | 0.000  | P | 2339.906  | P | 4654.070  | P | 2419.894  | LOC_Os01g08620.1 |
| DG <sub>HPU</sub> | Os048490_01 | S7 | -1.693 | 0.000  | P | 4871.474  | P | 1506.698  | P | 2229.258  | -                |
| DG <sub>HPU</sub> | Os048518_01 | S7 | 0.825  | 0.000  | P | 6654.895  | P | 11787.928 | P | 5804.813  | LOC_Os09g39000.1 |
| DG <sub>HPU</sub> | Os048525_01 | S7 | -1.237 | -1.693 | P | 1408.192  | P | 597.589   | P | 1932.151  | LOC_Os07g14750.1 |
| DG <sub>HPU</sub> | Os048668_01 | S7 | -1.822 | 0.000  | P | 1777.786  | P | 502.762   | P | 588.895   | LOC_Os06g43740.1 |
| DG <sub>HPU</sub> | Os048713_01 | S7 | -0.970 | 0.000  | P | 382.862   | P | 195.520   | P | 414.664   | LOC_Os11g27090.1 |
| DG <sub>HPU</sub> | Os048749_01 | S7 | 0.795  | 0.000  | P | 1092.775  | P | 1895.666  | P | 1326.063  | LOC_Os12g07560.1 |
| DG <sub>HPU</sub> | Os049190_01 | S7 | 0.881  | 0.000  | P | 128.549   | P | 236.701   | P | 289.597   | LOC_Os07g10850.1 |
| DG <sub>HPU</sub> | Os049394_01 | S7 | 0.723  | 0.000  | P | 153.069   | P | 252.680   | P | 306.453   | LOC_Os11g39760.1 |
| DG <sub>HPU</sub> | Os049505_01 | S7 | 0.962  | 0.000  | P | 186.306   | P | 362.932   | P | 370.399   | LOC_Os10g25250.1 |
| DG <sub>HPU</sub> | Os049578_01 | S7 | 0.821  | 0.000  | P | 397.089   | P | 701.465   | P | 504.721   | LOC_Os12g29820.1 |
| DG <sub>HPU</sub> | Os049802_01 | S7 | -1.175 | 0.000  | P | 428.942   | P | 189.974   | P | 239.597   | -                |
| DG <sub>HPU</sub> | Os050009_01 | S7 | 1.053  | 0.000  | P | 217.088   | P | 450.321   | P | 238.771   | LOC_Os05g46160.1 |
| DG <sub>HPU</sub> | Os050487_01 | S7 | 1.035  | 0.000  | P | 622.094   | P | 1274.670  | P | 459.063   | -                |
| DG <sub>HPU</sub> | Os050700_01 | S7 | -1.099 | -1.667 | P | 23630.680 | P | 11029.006 | P | 35030.463 | LOC_Os10g21280.1 |
| DG <sub>HPU</sub> | Os050836_01 | S7 | 0.746  | 0.000  | P | 5470.084  | P | 9175.003  | P | 4859.940  | LOC_Os05g14230.1 |
| DG <sub>HPU</sub> | Os050879_01 | S7 | 1.239  | 0.000  | P | 129.509   | P | 305.711   | P | 117.291   | LOC_Os05g30470.1 |
| DG <sub>HPU</sub> | Os051138_01 | S7 | -0.990 | 0.000  | P | 1360.095  | P | 684.559   | P | 592.564   | LOC_Os01g63830.1 |
| DG <sub>HPU</sub> | Os051609_01 | S7 | 0.812  | 0.000  | P | 190.603   | P | 334.619   | P | 174.409   | -                |
| DG <sub>HPU</sub> | Os051842_01 | S7 | 0.830  | 0.000  | P | 8620.273  | P | 15321.174 | P | 7033.106  | LOC_Os09g21140.1 |
| DG <sub>HPU</sub> | Os051892_01 | S7 | 0.000  | -1.431 | P | 24173.042 | P | 16316.900 | P | 43998.970 | LOC_Os08g15149.1 |
| DG <sub>HPU</sub> | Os051896_01 | S7 | 1.135  | 0.000  | P | 12117.279 | P | 26620.613 | P | 14023.130 | LOC_Os07g11410.1 |
| DG <sub>HPU</sub> | Os051948_01 | S7 | -0.918 | 0.000  | P | 758.460   | P | 401.281   | P | 689.361   | LOC_Os11g06720.1 |
| DG <sub>HPU</sub> | Os051949_01 | S7 | 1.110  | 0.000  | P | 6156.702  | P | 13286.531 | P | 7422.592  | LOC_Os06g31070.1 |
| DG <sub>HPU</sub> | Os051956_01 | S7 | -1.181 | -1.482 | P | 2020.787  | P | 891.507   | P | 2490.618  | LOC_Os07g37240.1 |
| DG <sub>HPU</sub> | Os051959_01 | S7 | -1.251 | -1.872 | P | 3761.772  | P | 1580.215  | P | 5782.847  | LOC_Os02g02400.1 |
| DG <sub>HPU</sub> | Os051970_01 | S7 | 0.000  | 1.547  | P | 2250.607  | P | 2153.478  | P | 736.992   | LOC_Os10g33800.1 |
| DG <sub>HPU</sub> | Os051980_01 | S7 | -0.829 | 0.000  | P | 788.600   | P | 443.845   | P | 1105.010  | LOC_Os02g27030.1 |
| DG <sub>HPU</sub> | Os052018_01 | S7 | -1.101 | -2.299 | P | 1126.538  | P | 525.092   | P | 2583.934  | -                |
| DG <sub>HPU</sub> | Os052028_01 | S7 | -1.384 | -2.008 | P | 434.493   | P | 166.477   | P | 669.684   | LOC_Os12g23200.1 |

|                   |             |    |        |        |   |           |   |           |   |           |                  |
|-------------------|-------------|----|--------|--------|---|-----------|---|-----------|---|-----------|------------------|
| DG <sub>HPU</sub> | Os052033_01 | S7 | -1.013 | 0.000  | P | 10326.811 | P | 5118.195  | P | 12522.676 | -                |
| DG <sub>HPU</sub> | Os052036_01 | S7 | -0.854 | 0.000  | P | 658.022   | P | 364.162   | P | 225.319   | LOC_Os10g40720.1 |
| DG <sub>HPU</sub> | Os052043_01 | S7 | 0.000  | -1.446 | P | 258.865   | P | 195.202   | P | 531.676   | LOC_Os07g42370.2 |
| DG <sub>HPU</sub> | Os052050_01 | S7 | -1.319 | 0.000  | P | 5748.068  | P | 2304.296  | P | 2579.002  | LOC_Os01g64960.1 |
| DG <sub>HPU</sub> | Os052069_01 | S7 | 0.755  | 2.150  | P | 1419.356  | P | 2395.422  | P | 539.543   | LOC_Os05g02060.1 |
| DG <sub>HPU</sub> | Os052079_01 | S7 | 0.000  | 1.512  | P | 808.223   | P | 879.560   | P | 308.317   | LOC_Os06g50300.1 |
| DG <sub>HPU</sub> | Os052085_01 | S7 | -0.797 | -2.227 | P | 797.417   | P | 458.976   | P | 2149.041  | LOC_Os07g25430.3 |
| DG <sub>HPU</sub> | Os052095_01 | S7 | -0.896 | 0.000  | P | 927.176   | P | 498.409   | P | 673.807   | LOC_Os03g12290.1 |
| DG <sub>HPU</sub> | Os052124_01 | S7 | 0.896  | 0.000  | P | 342.340   | P | 637.274   | P | 243.954   | LOC_Os08g08970.1 |
| DG <sub>HPU</sub> | Os052126_01 | S7 | -1.022 | 0.000  | P | 792.304   | P | 390.105   | P | 696.243   | LOC_Os08g41950.2 |
| DG <sub>HPU</sub> | Os052167_01 | S7 | 0.000  | -1.519 | P | 297.110   | P | 278.170   | P | 797.448   | -                |
| DG <sub>HPU</sub> | Os052203_01 | S7 | 0.753  | 0.000  | P | 301.865   | P | 508.586   | P | 831.403   | LOC_Os03g07480.2 |
| DG <sub>HPU</sub> | Os052287_01 | S7 | 0.000  | 1.763  | P | 2339.851  | P | 3336.873  | P | 983.343   | LOC_Os05g34510.1 |
| DG <sub>HPU</sub> | Os052389_01 | S7 | 0.815  | 0.000  | P | 467.116   | P | 821.730   | P | 670.376   | LOC_Os03g29740.1 |
| DG <sub>HPU</sub> | Os052396_01 | S7 | 0.000  | 1.579  | P | 2108.669  | P | 2145.629  | P | 718.057   | LOC_Os05g01290.1 |
| DG <sub>HPU</sub> | Os052424_01 | S7 | 0.000  | 1.547  | P | 495.675   | P | 545.144   | P | 186.562   | LOC_Os12g13380.1 |
| DG <sub>HPU</sub> | Os052554_01 | S7 | 0.000  | -1.435 | P | 294.228   | P | 255.814   | P | 691.857   | LOC_Os04g40600.1 |
| DG <sub>HPU</sub> | Os052654_01 | S7 | 0.000  | -1.499 | P | 203.381   | P | 194.558   | P | 549.929   | LOC_Os07g09970.1 |
| DG <sub>HPU</sub> | Os052664_01 | S7 | 0.000  | -1.372 | P | 281.501   | P | 272.655   | P | 705.857   | LOC_Os03g14570.2 |
| DG <sub>HPU</sub> | Os052960_01 | S7 | -0.861 | 0.000  | P | 412.481   | P | 227.142   | P | 331.077   | LOC_Os01g12110.2 |
| DG <sub>HPU</sub> | Os053043_01 | S7 | 0.926  | 0.000  | P | 117.237   | P | 222.827   | P | 198.939   | LOC_Os05g39250.1 |
| DG <sub>HPU</sub> | Os053139_01 | S7 | 1.308  | 0.000  | P | 6944.286  | P | 17194.662 | P | 9059.082  | LOC_Os06g31060.1 |
| DG <sub>HPU</sub> | Os053243_01 | S7 | 0.821  | 0.000  | P | 261.429   | P | 461.945   | P | 509.598   | LOC_Os12g20310.1 |
| DG <sub>HPU</sub> | Os053270_01 | S7 | -0.932 | 0.000  | P | 1344.335  | P | 704.620   | P | 1051.449  | LOC_Os01g03290.1 |
| DG <sub>HPU</sub> | Os053687_01 | S7 | 0.000  | -1.495 | P | 1140.949  | P | 796.383   | P | 2245.045  | LOC_Os02g55400.1 |
| DG <sub>HPU</sub> | Os053817_01 | S7 | 0.812  | 0.000  | P | 247.403   | P | 434.432   | P | 594.935   | -                |
| DG <sub>HPU</sub> | Os054002_01 | S7 | 0.820  | 0.000  | P | 3848.571  | P | 6792.339  | P | 2574.469  | LOC_Os01g23790.1 |
| DG <sub>HPU</sub> | Os054366_01 | S7 | -1.575 | -1.979 | P | 5576.455  | P | 1872.097  | P | 7382.008  | LOC_Os12g19381.1 |
| DG <sub>HPU</sub> | Os054368_01 | S7 | -0.902 | -2.203 | P | 19824.202 | P | 10608.475 | P | 48860.028 | LOC_Os12g19394.1 |
| DG <sub>HPU</sub> | Os054371_01 | S7 | 0.971  | 0.000  | P | 4217.595  | P | 8268.539  | P | 6075.684  | LOC_Os02g15070.1 |
| DG <sub>HPU</sub> | Os054376_01 | S7 | 1.250  | 0.000  | P | 14408.411 | P | 34273.979 | P | 32607.421 | LOC_Os10g26060.1 |

|                   |             |    |        |        |   |          |   |           |   |          |                  |
|-------------------|-------------|----|--------|--------|---|----------|---|-----------|---|----------|------------------|
| DG <sub>HPU</sub> | Os054395_01 | S7 | -0.966 | 0.000  | P | 657.521  | P | 336.695   | P | 458.940  | LOC_Os02g41650.2 |
| DG <sub>HPU</sub> | Os054446_01 | S7 | 0.000  | -1.636 | P | 402.444  | P | 329.805   | P | 1024.750 | LOC_Os07g01760.1 |
| DG <sub>HPU</sub> | Os054452_01 | S7 | -1.512 | -2.226 | P | 863.822  | P | 302.982   | P | 1417.103 | LOC_Os07g04840.1 |
| DG <sub>HPU</sub> | Os054458_01 | S7 | 0.000  | 1.654  | P | 2663.745 | P | 2851.059  | P | 905.762  | LOC_Os12g05050.1 |
| DG <sub>HPU</sub> | Os054459_01 | S7 | -1.392 | -2.079 | P | 1225.726 | P | 466.918   | P | 1973.432 | LOC_Os08g10020.2 |
| DG <sub>HPU</sub> | Os054509_01 | S7 | -0.892 | -1.988 | P | 394.343  | P | 212.563   | P | 842.938  | LOC_Os02g47020.1 |
| DG <sub>HPU</sub> | Os054522_01 | S7 | 0.000  | 1.928  | P | 8444.469 | P | 12390.939 | P | 3255.302 | LOC_Os02g15090.1 |
| DG <sub>HPU</sub> | Os054533_01 | S7 | 0.000  | -1.787 | P | 776.388  | P | 486.838   | P | 1680.548 | LOC_Os03g56670.2 |
| DG <sub>HPU</sub> | Os054539_01 | S7 | 0.000  | -1.877 | P | 1917.313 | P | 1305.018  | P | 4794.652 | LOC_Os09g30340.1 |
| DG <sub>HPU</sub> | Os054558_01 | S7 | 0.000  | 1.938  | P | 6599.956 | P | 10276.372 | P | 2681.379 | LOC_Os02g32660.1 |
| DG <sub>HPU</sub> | Os054559_01 | S7 | 0.000  | 1.745  | P | 2448.730 | P | 3056.061  | P | 911.590  | LOC_Os02g32660.1 |
| DG <sub>HPU</sub> | Os054580_01 | S7 | 0.728  | 0.000  | P | 2300.309 | P | 3808.916  | P | 2415.051 | LOC_Os10g32720.1 |
| DG <sub>HPU</sub> | Os054583_01 | S7 | -0.999 | 0.000  | P | 441.460  | P | 220.911   | P | 364.235  | LOC_Os06g04270.1 |
| DG <sub>HPU</sub> | Os054607_01 | S7 | 0.742  | 0.000  | P | 168.253  | P | 281.354   | P | 261.782  | LOC_Os05g06780.1 |
| DG <sub>HPU</sub> | Os054616_01 | S7 | 0.766  | 0.000  | P | 209.995  | P | 357.011   | A | 252.681  | LOC_Os05g23860.1 |
| DG <sub>HPU</sub> | Os054630_01 | S7 | 1.526  | 0.000  | P | 957.722  | P | 2758.752  | P | 1314.076 | LOC_Os04g08270.1 |
| DG <sub>HPU</sub> | Os054635_01 | S7 | 1.044  | 0.000  | P | 1009.825 | P | 2082.653  | P | 976.255  | LOC_Os02g48480.1 |
| DG <sub>HPU</sub> | Os054639_01 | S7 | 0.000  | 1.494  | P | 2837.059 | P | 4184.684  | P | 1485.614 | LOC_Os10g25130.1 |
| DG <sub>HPU</sub> | Os054661_02 | S7 | 0.000  | -1.657 | P | 349.561  | P | 205.753   | P | 648.651  | -                |
| DG <sub>HPU</sub> | Os054687_01 | S7 | 0.000  | 2.206  | P | 4014.079 | P | 6205.527  | P | 1345.228 | LOC_Os03g55090.1 |
| DG <sub>HPU</sub> | Os054746_01 | S7 | 0.763  | 0.000  | P | 240.480  | P | 408.094   | P | 388.474  | LOC_Os10g40780.2 |
| DG <sub>HPU</sub> | Os054779_01 | S7 | -0.981 | 0.000  | P | 356.560  | P | 180.639   | P | 221.499  | LOC_Os01g13770.1 |
| DG <sub>HPU</sub> | Os054802_01 | S7 | -0.776 | 0.000  | P | 349.256  | P | 203.911   | P | 286.419  | LOC_Os01g02940.4 |
| DG <sub>HPU</sub> | Os054859_01 | S7 | 0.853  | 0.000  | P | 466.043  | P | 841.762   | P | 487.280  | LOC_Os03g07226.2 |
| DG <sub>HPU</sub> | Os054867_01 | S7 | 0.976  | 0.000  | P | 173.322  | P | 340.851   | P | 321.569  | LOC_Os06g44190.1 |
| DG <sub>HPU</sub> | Os054912_01 | S7 | -1.048 | 0.000  | P | 4799.773 | P | 2320.687  | P | 5372.696 | LOC_Os02g44108.1 |
| DG <sub>HPU</sub> | Os054914_01 | S7 | 0.000  | 1.810  | P | 1032.878 | P | 1509.663  | P | 430.635  | LOC_Os03g40440.1 |
| DG <sub>HPU</sub> | Os054939_01 | S7 | 0.738  | 0.000  | P | 218.771  | P | 365.006   | P | 368.440  | LOC_Os01g37560.3 |
| DG <sub>HPU</sub> | Os054951_01 | S7 | 0.748  | 0.000  | P | 1520.243 | P | 2553.716  | P | 2087.988 | LOC_Os01g50700.1 |
| DG <sub>HPU</sub> | Os055079_01 | S7 | -1.574 | 0.000  | P | 997.561  | P | 334.951   | P | 479.141  | LOC_Os10g43060.1 |
| DG <sub>HPU</sub> | Os055090_01 | S7 | 0.822  | 0.000  | P | 274.160  | P | 484.554   | P | 641.809  | LOC_Os01g53700.1 |

|                   |             |    |        |        |   |           |   |           |   |           |                  |
|-------------------|-------------|----|--------|--------|---|-----------|---|-----------|---|-----------|------------------|
| DG <sub>HPU</sub> | Os055093_01 | S7 | 0.886  | 1.847  | P | 772.518   | P | 1428.020  | P | 396.917   | LOC_Os04g41980.2 |
| DG <sub>HPU</sub> | Os055174_01 | S7 | 0.848  | 1.739  | P | 1032.221  | P | 1857.550  | P | 556.390   | LOC_Os10g29549.1 |
| DG <sub>HPU</sub> | Os055322_01 | S7 | 0.000  | 1.571  | P | 4070.745  | P | 4878.670  | P | 1642.144  | -                |
| DG <sub>HPU</sub> | Os055328_01 | S7 | 0.788  | 0.000  | P | 491.236   | P | 848.260   | P | 872.716   | LOC_Os03g58980.1 |
| DG <sub>HPU</sub> | Os055402_01 | S7 | 0.000  | 1.493  | P | 373.458   | P | 512.868   | P | 182.203   | LOC_Os11g31360.1 |
| DG <sub>HPU</sub> | Os055412_01 | S7 | 0.000  | 1.505  | P | 32206.659 | P | 39844.179 | P | 14034.738 | LOC_Os03g55734.1 |
| DG <sub>HPU</sub> | Os055450_01 | S7 | -0.809 | 0.000  | P | 2018.229  | P | 1152.207  | P | 849.863   | LOC_Os03g12560.1 |
| DG <sub>HPU</sub> | Os055760_01 | S7 | 0.000  | 1.574  | P | 748.041   | P | 1084.375  | P | 364.140   | LOC_Os11g34390.1 |
| DG <sub>HPU</sub> | Os056135_01 | S7 | -1.607 | 0.000  | P | 2261.433  | P | 742.414   | P | 1019.507  | LOC_Os10g13680.1 |
| DG <sub>HPU</sub> | Os056340_01 | S7 | 0.926  | 1.683  | P | 644.696   | P | 1224.597  | P | 381.433   | LOC_Os07g08420.1 |
| DG <sub>HPU</sub> | Os056402_01 | S7 | 1.007  | 0.000  | P | 105.441   | P | 211.845   | P | 211.049   | LOC_Os03g25430.1 |
| DG <sub>HPU</sub> | Os056527_01 | S7 | 0.787  | 0.000  | P | 463.316   | P | 799.612   | P | 1145.025  | -                |
| DG <sub>HPU</sub> | Os056701_01 | S7 | 0.740  | 0.000  | P | 1078.527  | P | 1801.276  | P | 838.632   | -                |
| DG <sub>HPU</sub> | Os056910_02 | S7 | -1.215 | -1.541 | P | 3445.595  | P | 1483.780  | P | 4318.018  | LOC_Os08g33820.1 |
| DG <sub>HPU</sub> | Os056921_02 | S7 | 0.896  | 0.000  | P | 157.618   | P | 293.291   | A | 78.558    | -                |
| DG <sub>HPU</sub> | Os057016_02 | S7 | 0.000  | -1.748 | P | 1520.432  | P | 1199.760  | P | 4029.776  | -                |
| DG <sub>HPU</sub> | Os057164_02 | S7 | 0.000  | -1.414 | A | 118.219   | P | 199.270   | P | 530.940   | LOC_Os07g10780.1 |
| DG <sub>HPU</sub> | Os057168_02 | S7 | 0.766  | 0.000  | P | 237.779   | P | 404.273   | P | 479.102   | -                |
| DG <sub>HPU</sub> | Os057254_02 | S7 | -1.027 | -1.552 | P | 3874.080  | P | 1901.489  | P | 5574.375  | -                |
| DG <sub>HPU</sub> | Os057343_02 | S7 | 0.000  | -1.405 | P | 390.999   | P | 353.602   | P | 936.138   | LOC_Os03g01210.1 |
| DG <sub>HPU</sub> | Os057361_02 | S7 | 0.739  | 0.000  | P | 199.587   | P | 333.188   | P | 370.941   | -                |
| DG <sub>HPU</sub> | Os057480_02 | S7 | -1.077 | 0.000  | P | 4536.622  | P | 2150.685  | P | 1623.853  | -                |
| DG <sub>HPU</sub> | Os057481_02 | S7 | 0.000  | -2.045 | A | 48.586    | P | 173.394   | P | 715.645   | LOC_Os04g43390.1 |
| DG <sub>HPU</sub> | Os057552_02 | S7 | 1.583  | 0.000  | P | 228.729   | P | 685.292   | P | 390.712   | LOC_Os07g29760.1 |

| DG category     | GeneID      | Tissue | log2(L/N) | log2(L/P) | N flag | N intens | L flag | L intens | P flag | P intens | log2(N/P) | TIGR5 ID         |
|-----------------|-------------|--------|-----------|-----------|--------|----------|--------|----------|--------|----------|-----------|------------------|
| DG <sub>O</sub> | Os000047_01 | S1     | 0.000     | 0.944     | P      | 450.813  | P      | 253.701  | P      | 131.838  | 1.774     | -                |
| DG <sub>O</sub> | Os000258_01 | S1     | 1.019     | 0.000     | P      | 158.982  | P      | 322.212  | P      | 366.201  | -1.204    | LOC_Os02g51320.1 |
| DG <sub>O</sub> | Os000594_01 | S1     | 1.144     | 0.000     | P      | 409.067  | P      | 904.214  | P      | 1014.858 | -1.311    | LOC_Os04g29550.1 |
| DG <sub>O</sub> | Os000689_01 | S1     | 0.000     | 0.830     | P      | 388.427  | P      | 278.771  | P      | 156.791  | 1.309     | LOC_Os02g32990.1 |
| DG <sub>O</sub> | Os000896_01 | S1     | 0.000     | 1.089     | P      | 559.446  | P      | 392.030  | P      | 184.281  | 1.602     | LOC_Os01g67220.2 |



|                 |             |    |        |        |   |          |   |           |   |           |        |                   |
|-----------------|-------------|----|--------|--------|---|----------|---|-----------|---|-----------|--------|-------------------|
| DG <sub>o</sub> | Os000902_01 | S1 | 0.000  | 1.212  | P | 517.527  | P | 497.745   | P | 214.892   | 1.268  | LOC_Os03g53360.1  |
| DG <sub>o</sub> | Os001058_01 | S1 | 0.000  | 2.311  | P | 1059.820 | P | 1230.114  | P | 247.920   | 2.096  | LOC_Os07g10540.1  |
| DG <sub>o</sub> | Os001714_01 | S1 | 0.000  | 0.894  | P | 421.843  | P | 306.341   | P | 164.859   | 1.355  | LOC_Os08g02370.1  |
| DG <sub>o</sub> | Os001925_01 | S1 | 0.000  | 0.995  | P | 495.900  | P | 295.835   | P | 148.398   | 1.741  | LOC_Os06g03860.1  |
| DG <sub>o</sub> | Os001942_01 | S1 | 1.162  | 0.000  | P | 4710.273 | P | 10542.619 | P | 11547.437 | -1.294 | -                 |
| DG <sub>o</sub> | Os002024_01 | S1 | -0.934 | 0.000  | P | 833.721  | P | 436.279   | P | 310.708   | 1.424  | LOC_Os01g69110.1  |
| DG <sub>o</sub> | Os002197_01 | S1 | 0.000  | 3.483  | P | 1324.305 | P | 1508.359  | P | 134.928   | 3.295  | LOC_Os01g63250.1  |
| DG <sub>o</sub> | Os002221_01 | S1 | -1.134 | 0.000  | P | 402.875  | P | 183.540   | P | 180.464   | 1.159  | LOC_Os06g13280.1  |
| DG <sub>o</sub> | Os002233_01 | S1 | -1.163 | 1.082  | P | 682.767  | P | 304.986   | P | 144.044   | 2.245  | -                 |
| DG <sub>o</sub> | Os002678_01 | S1 | -1.773 | 0.000  | P | 3930.918 | P | 1150.031  | P | 1262.263  | 1.639  | LOC_Os05g03920.1  |
| DG <sub>o</sub> | Os002898_01 | S1 | 0.000  | 0.820  | P | 367.858  | P | 294.788   | P | 166.995   | 1.139  | LOC_Os11g11330.1  |
| DG <sub>o</sub> | Os003650_01 | S1 | 0.000  | 1.016  | P | 398.040  | P | 297.926   | P | 147.338   | 1.434  | LOC_Os03g15740.1  |
| DG <sub>o</sub> | Os004301_01 | S1 | -1.157 | 0.000  | P | 401.623  | P | 180.128   | P | 150.419   | 1.417  | LOC_Os05g07870.1  |
| DG <sub>o</sub> | Os004399_01 | S1 | -1.333 | 0.000  | P | 1035.240 | P | 410.999   | P | 424.879   | 1.285  | LOC_Os02g40180.1  |
| DG <sub>o</sub> | Os005944_01 | S1 | -1.375 | 0.000  | P | 9786.161 | P | 3772.870  | P | 4178.792  | 1.228  | LOC_Os04g51070.1  |
| DG <sub>o</sub> | Os006051_01 | S1 | 0.000  | -0.963 | P | 489.732  | P | 766.692   | P | 1494.345  | -1.609 | LOC_Os07g04480.1  |
| DG <sub>o</sub> | Os006128_01 | S1 | 0.000  | 0.794  | P | 450.971  | P | 297.398   | P | 171.514   | 1.395  | -                 |
| DG <sub>o</sub> | Os006587_01 | S1 | 0.000  | 1.932  | P | 914.366  | P | 994.293   | P | 260.538   | 1.811  | -                 |
| DG <sub>o</sub> | Os007729_01 | S1 | -0.938 | 0.000  | P | 533.984  | P | 278.677   | P | 180.918   | 1.561  | LOC_Os09g29380.1  |
| DG <sub>o</sub> | Os008450_01 | S1 | 0.000  | 1.327  | P | 1870.112 | P | 1299.194  | P | 517.827   | 1.853  | LOC_Os01g67980.1  |
| DG <sub>o</sub> | Os008640_01 | S1 | -0.864 | 0.891  | P | 3854.051 | P | 2117.552  | P | 1142.229  | 1.755  | LOC_Os02g32814.1  |
| DG <sub>o</sub> | Os008720_01 | S1 | 3.038  | -0.950 | P | 99.696   | P | 818.586   | P | 1581.209  | -3.987 | -                 |
| DG <sub>o</sub> | Os008842_01 | S1 | -0.943 | 0.000  | P | 870.263  | P | 452.584   | P | 319.567   | 1.445  | LOC_Os11g39020.1  |
| DG <sub>o</sub> | Os008886_01 | S1 | -0.925 | 0.000  | P | 461.600  | P | 243.036   | P | 210.965   | 1.130  | LOC_Os11g10990.1  |
| DG <sub>o</sub> | Os008928_01 | S1 | 0.000  | 1.089  | P | 386.760  | P | 362.513   | P | 170.405   | 1.182  | LOC_Os03g59710.1  |
| DG <sub>o</sub> | Os008934_01 | S1 | 0.000  | 0.827  | P | 728.756  | P | 486.996   | P | 274.503   | 1.409  | LOC_Os02g15640.1  |
| DG <sub>o</sub> | Os009054_01 | S1 | 1.288  | 0.000  | P | 232.160  | P | 566.924   | P | 568.276   | -1.291 | LOC_Os02g49790.1  |
| DG <sub>o</sub> | Os009529_01 | S1 | -0.866 | 0.000  | P | 435.757  | P | 239.115   | P | 195.673   | 1.155  | LOC_Os10g40934.10 |
| DG <sub>o</sub> | Os009767_01 | S1 | -0.947 | 0.000  | P | 870.479  | P | 451.571   | P | 379.890   | 1.196  | LOC_Os04g32270.2  |
| DG <sub>o</sub> | Os009904_01 | S1 | -1.029 | 0.000  | P | 2041.387 | P | 1000.171  | P | 782.862   | 1.383  | LOC_Os07g07540.1  |
| DG <sub>o</sub> | Os010390_01 | S1 | 0.000  | 0.803  | P | 441.758  | P | 325.170   | P | 186.315   | 1.246  | LOC_Os05g48160.1  |

|                 |              |    |        |       |   |           |   |           |   |           |        |                  |
|-----------------|--------------|----|--------|-------|---|-----------|---|-----------|---|-----------|--------|------------------|
| DG <sub>o</sub> | Os010460_01  | S1 | 0.000  | 1.254 | P | 842.853   | P | 836.939   | P | 351.031   | 1.264  | -                |
| DG <sub>o</sub> | Os010823_01  | S1 | 1.255  | 0.000 | P | 174.353   | P | 416.211   | P | 420.425   | -1.270 | LOC_Os01g29180.1 |
| DG <sub>o</sub> | Os010948_01  | S1 | -1.300 | 0.826 | P | 5351.654  | P | 2172.887  | P | 1225.654  | 2.126  | LOC_Os03g03724.2 |
| DG <sub>o</sub> | Os010958_01  | S1 | 2.084  | 0.000 | P | 10410.444 | P | 44140.317 | P | 26221.862 | -1.333 | LOC_Os06g11860.1 |
| DG <sub>o</sub> | Os011001_01  | S1 | -1.147 | 0.000 | P | 628.781   | P | 283.927   | P | 270.157   | 1.219  | LOC_Os05g46480.4 |
| DG <sub>o</sub> | Os0111314_01 | S1 | 1.309  | 0.000 | P | 122.346   | P | 303.207   | P | 338.620   | -1.469 | LOC_Os06g08910.3 |
| DG <sub>o</sub> | Os011344_01  | S1 | 0.000  | 1.125 | P | 1080.729  | P | 881.183   | P | 404.015   | 1.420  | -                |
| DG <sub>o</sub> | Os011820_01  | S1 | 2.356  | 0.000 | P | 103.607   | P | 530.261   | P | 558.188   | -2.430 | -                |
| DG <sub>o</sub> | Os012152_01  | S1 | -1.204 | 0.000 | P | 1190.163  | P | 516.647   | P | 377.237   | 1.658  | LOC_Os01g18800.1 |
| DG <sub>o</sub> | Os012218_01  | S1 | -1.163 | 1.193 | P | 1745.023  | P | 779.485   | P | 340.823   | 2.356  | LOC_Os02g41550.3 |
| DG <sub>o</sub> | Os012425_01  | S1 | 1.167  | 0.000 | P | 91.580    | P | 205.630   | P | 223.725   | -1.289 | -                |
| DG <sub>o</sub> | Os012547_01  | S1 | -1.211 | 0.867 | P | 1004.468  | P | 433.879   | P | 237.912   | 2.078  | LOC_Os02g10350.1 |
| DG <sub>o</sub> | Os012571_01  | S1 | -0.967 | 0.000 | P | 384.171   | P | 196.588   | P | 150.932   | 1.348  | LOC_Os05g05590.1 |
| DG <sub>o</sub> | Os012646_01  | S1 | 0.000  | 0.962 | P | 1207.045  | P | 786.096   | P | 403.430   | 1.581  | LOC_Os08g28730.1 |
| DG <sub>o</sub> | Os012664_01  | S1 | -1.121 | 0.000 | P | 995.061   | P | 457.350   | P | 321.393   | 1.630  | LOC_Os02g52650.1 |
| DG <sub>o</sub> | Os012670_01  | S1 | 0.000  | 0.901 | P | 756.131   | P | 640.005   | P | 342.730   | 1.142  | LOC_Os04g33310.1 |
| DG <sub>o</sub> | Os013156_01  | S1 | -0.961 | 0.000 | P | 512.843   | P | 263.482   | P | 195.587   | 1.391  | LOC_Os03g62240.1 |
| DG <sub>o</sub> | Os013279_01  | S1 | -1.403 | 0.000 | P | 862.909   | P | 326.256   | P | 315.496   | 1.452  | LOC_Os07g35480.3 |
| DG <sub>o</sub> | Os013532_01  | S1 | -1.318 | 0.000 | P | 1290.829  | P | 517.750   | P | 354.659   | 1.864  | LOC_Os01g55094.2 |
| DG <sub>o</sub> | Os013652_01  | S1 | 0.000  | 0.893 | P | 953.492   | P | 621.192   | P | 334.578   | 1.511  | LOC_Os04g51120.1 |
| DG <sub>o</sub> | Os013718_01  | S1 | -0.915 | 0.000 | P | 592.100   | P | 314.063   | P | 218.810   | 1.436  | LOC_Os07g31850.1 |
| DG <sub>o</sub> | Os013723_01  | S1 | -1.054 | 0.000 | P | 493.883   | P | 237.838   | P | 190.337   | 1.376  | LOC_Os03g62370.1 |
| DG <sub>o</sub> | Os013959_01  | S1 | -0.896 | 0.000 | P | 1436.509  | P | 772.203   | P | 653.320   | 1.137  | LOC_Os01g31870.1 |
| DG <sub>o</sub> | Os014085_01  | S1 | 1.450  | 0.000 | P | 206.733   | P | 564.854   | P | 610.746   | -1.563 | -                |
| DG <sub>o</sub> | Os014289_01  | S1 | 1.464  | 0.000 | P | 99.232    | P | 273.685   | P | 341.221   | -1.782 | LOC_Os07g26000.1 |
| DG <sub>o</sub> | Os014364_01  | S1 | 1.207  | 0.000 | P | 158.973   | P | 367.012   | P | 528.587   | -1.733 | LOC_Os01g45914.1 |
| DG <sub>o</sub> | Os014522_01  | S1 | -0.965 | 0.000 | P | 1165.401  | P | 596.998   | P | 467.530   | 1.318  | LOC_Os08g14450.1 |
| DG <sub>o</sub> | Os014557_01  | S1 | 1.618  | 0.000 | P | 183.180   | P | 562.076   | P | 559.693   | -1.611 | LOC_Os03g22620.1 |
| DG <sub>o</sub> | Os014887_01  | S1 | 1.651  | 0.000 | P | 194.991   | P | 612.259   | P | 859.407   | -2.140 | LOC_Os04g25740.1 |
| DG <sub>o</sub> | Os015021_01  | S1 | -1.363 | 0.000 | P | 1861.891  | P | 724.098   | P | 609.587   | 1.611  | LOC_Os10g29502.1 |
| DG <sub>o</sub> | Os015562_01  | S1 | -1.279 | 0.000 | P | 697.990   | P | 287.546   | P | 281.731   | 1.309  | LOC_Os12g05730.1 |

|                 |             |    |        |        |   |          |   |          |   |          |        |                  |
|-----------------|-------------|----|--------|--------|---|----------|---|----------|---|----------|--------|------------------|
| DG <sub>o</sub> | Os015693_01 | S1 | 1.059  | 0.000  | P | 475.684  | P | 991.148  | P | 1134.704 | -1.254 | LOC_Os10g11354.1 |
| DG <sub>o</sub> | Os015744_01 | S1 | -0.906 | 0.000  | P | 681.351  | P | 363.639  | P | 260.106  | 1.389  | LOC_Os04g54790.1 |
| DG <sub>o</sub> | Os016542_01 | S1 | -0.892 | 0.000  | P | 790.105  | P | 425.726  | P | 299.675  | 1.399  | LOC_Os05g14270.1 |
| DG <sub>o</sub> | Os016689_01 | S1 | 0.000  | 1.301  | P | 656.576  | P | 412.027  | P | 167.176  | 1.974  | LOC_Os08g01514.1 |
| DG <sub>o</sub> | Os016738_01 | S1 | -0.948 | 0.000  | P | 428.547  | P | 222.191  | P | 176.185  | 1.282  | LOC_Os02g28900.1 |
| DG <sub>o</sub> | Os016966_01 | S1 | 0.000  | 0.915  | P | 9418.272 | P | 6536.519 | P | 3466.939 | 1.442  | LOC_Os04g32850.2 |
| DG <sub>o</sub> | Os017372_01 | S1 | -1.282 | 0.000  | P | 547.300  | P | 224.989  | P | 176.878  | 1.630  | LOC_Os11g45720.1 |
| DG <sub>o</sub> | Os017668_01 | S1 | -1.135 | 0.000  | P | 403.846  | P | 183.877  | P | 136.629  | 1.564  | LOC_Os05g47442.1 |
| DG <sub>o</sub> | Os018865_01 | S1 | -0.917 | 0.000  | P | 1078.773 | P | 571.220  | P | 420.235  | 1.360  | -                |
| DG <sub>o</sub> | Os018984_01 | S1 | -0.892 | 0.000  | P | 728.793  | P | 392.810  | P | 252.029  | 1.532  | LOC_Os06g03600.2 |
| DG <sub>o</sub> | Os019083_01 | S1 | 0.000  | 1.164  | P | 370.038  | P | 329.987  | P | 147.238  | 1.330  | LOC_Os05g22960.1 |
| DG <sub>o</sub> | Os019163_01 | S1 | -1.318 | 0.000  | P | 5798.130 | P | 2325.419 | P | 1938.652 | 1.581  | LOC_Os01g08560.2 |
| DG <sub>o</sub> | Os019366_01 | S1 | 0.000  | 0.938  | P | 496.568  | P | 361.001  | P | 188.468  | 1.398  | LOC_Os03g13590.1 |
| DG <sub>o</sub> | Os019413_01 | S1 | -1.440 | 0.000  | P | 4021.955 | P | 1482.302 | P | 1058.172 | 1.926  | LOC_Os07g49110.1 |
| DG <sub>o</sub> | Os019560_01 | S1 | 1.395  | 0.000  | P | 117.374  | P | 308.776  | P | 314.552  | -1.422 | LOC_Os10g03850.1 |
| DG <sub>o</sub> | Os019665_01 | S1 | -0.886 | 0.930  | P | 1853.723 | P | 1003.409 | P | 526.652  | 1.816  | -                |
| DG <sub>o</sub> | Os019688_01 | S1 | -1.007 | 0.000  | P | 4389.057 | P | 2183.423 | P | 1975.435 | 1.152  | LOC_Os04g02820.2 |
| DG <sub>o</sub> | Os019935_01 | S1 | 0.000  | 0.890  | P | 890.251  | P | 662.130  | P | 357.258  | 1.317  | LOC_Os05g48700.1 |
| DG <sub>o</sub> | Os019937_01 | S1 | 1.853  | -0.796 | P | 239.398  | P | 864.682  | P | 1501.364 | -2.649 | LOC_Os10g03750.1 |
| DG <sub>o</sub> | Os020077_01 | S1 | 0.000  | 0.877  | P | 1673.338 | P | 1389.619 | P | 756.789  | 1.145  | LOC_Os07g37800.1 |
| DG <sub>o</sub> | Os020281_01 | S1 | -0.938 | 0.000  | P | 2197.120 | P | 1147.097 | P | 916.115  | 1.262  | LOC_Os03g64130.1 |
| DG <sub>o</sub> | Os020332_01 | S1 | -0.859 | 0.000  | P | 1129.825 | P | 622.857  | P | 400.861  | 1.495  | LOC_Os03g47580.1 |
| DG <sub>o</sub> | Os020445_01 | S1 | -0.885 | 0.000  | P | 1133.251 | P | 613.840  | P | 447.670  | 1.340  | LOC_Os06g43210.1 |
| DG <sub>o</sub> | Os020872_01 | S1 | 0.000  | 0.914  | P | 432.553  | P | 304.069  | P | 161.410  | 1.422  | LOC_Os01g72870.2 |
| DG <sub>o</sub> | Os021073_01 | S1 | 1.020  | 0.000  | P | 994.449  | P | 2016.143 | P | 2564.343 | -1.367 | LOC_Os02g39000.1 |
| DG <sub>o</sub> | Os021479_01 | S1 | 1.971  | 0.000  | P | 78.898   | P | 309.280  | P | 299.695  | -1.925 | LOC_Os04g09654.1 |
| DG <sub>o</sub> | Os022964_01 | S1 | -0.950 | 0.000  | P | 482.605  | P | 249.773  | P | 200.499  | 1.267  | LOC_Os06g28060.1 |
| DG <sub>o</sub> | Os023514_01 | S1 | -0.953 | 0.842  | P | 1908.699 | P | 985.749  | P | 549.922  | 1.795  | LOC_Os05g35050.1 |
| DG <sub>o</sub> | Os023881_01 | S1 | 1.384  | 0.000  | P | 130.789  | P | 341.301  | P | 371.086  | -1.505 | LOC_Os03g53690.1 |
| DG <sub>o</sub> | Os024086_01 | S1 | -1.461 | 0.000  | P | 1622.368 | P | 589.174  | P | 668.320  | 1.279  | LOC_Os10g25310.1 |
| DG <sub>o</sub> | Os024737_01 | S1 | 1.723  | 0.000  | P | 116.011  | P | 382.861  | P | 271.857  | -1.229 | LOC_Os01g01660.1 |

|                 |             |    |        |        |   |          |   |          |   |          |        |                  |
|-----------------|-------------|----|--------|--------|---|----------|---|----------|---|----------|--------|------------------|
| DG <sub>o</sub> | Os025501_01 | S1 | 1.338  | 0.000  | P | 170.295  | P | 430.653  | P | 491.452  | -1.529 | LOC_Os04g48410.1 |
| DG <sub>o</sub> | Os025786_01 | S1 | -0.883 | 0.000  | P | 400.040  | P | 216.903  | P | 156.076  | 1.358  | -                |
| DG <sub>o</sub> | Os028048_01 | S1 | 3.841  | -0.730 | P | 155.028  | P | 2221.735 | P | 3685.582 | -4.571 | LOC_Os09g16300.1 |
| DG <sub>o</sub> | Os028344_01 | S1 | -1.010 | 0.000  | P | 560.207  | P | 278.166  | P | 220.980  | 1.342  | LOC_Os01g45970.1 |
| DG <sub>o</sub> | Os029140_01 | S1 | 0.000  | 0.849  | P | 952.462  | P | 678.873  | P | 376.907  | 1.337  | LOC_Os08g01520.1 |
| DG <sub>o</sub> | Os029722_01 | S1 | -0.941 | 0.000  | P | 1899.630 | P | 989.603  | P | 811.223  | 1.228  | LOC_Os05g03600.1 |
| DG <sub>o</sub> | Os030307_01 | S1 | 1.031  | 0.000  | P | 122.520  | P | 250.417  | P | 310.064  | -1.340 | LOC_Os07g36510.1 |
| DG <sub>o</sub> | Os030378_01 | S1 | 0.000  | -0.668 | P | 727.480  | P | 1307.267 | P | 2077.640 | -1.514 | LOC_Os06g09390.2 |
| DG <sub>o</sub> | Os030806_01 | S1 | 1.084  | 0.000  | P | 1162.232 | P | 2463.721 | P | 2690.285 | -1.211 | -                |
| DG <sub>o</sub> | Os031446_01 | S1 | 1.401  | 0.000  | P | 239.387  | P | 632.194  | P | 665.117  | -1.474 | -                |
| DG <sub>o</sub> | Os031447_01 | S1 | 1.199  | -0.655 | P | 106.127  | P | 243.569  | P | 383.522  | -1.854 | LOC_Os01g34940.1 |
| DG <sub>o</sub> | Os031968_01 | S1 | 1.104  | -0.656 | P | 130.321  | P | 280.149  | P | 441.502  | -1.760 | LOC_Os01g60520.1 |
| DG <sub>o</sub> | Os033744_01 | S1 | 1.054  | 0.000  | P | 149.056  | P | 309.381  | P | 342.573  | -1.201 | LOC_Os03g05450.1 |
| DG <sub>o</sub> | Os033846_01 | S1 | 1.508  | -1.046 | P | 118.698  | P | 337.538  | P | 696.752  | -2.553 | LOC_Os03g51570.1 |
| DG <sub>o</sub> | Os034452_01 | S1 | 0.000  | 0.898  | P | 429.609  | P | 294.928  | P | 158.291  | 1.440  | LOC_Os09g02350.1 |
| DG <sub>o</sub> | Os034533_01 | S1 | 1.134  | 0.000  | P | 124.307  | P | 272.827  | P | 290.160  | -1.223 | LOC_Os05g12270.1 |
| DG <sub>o</sub> | Os035905_01 | S1 | -1.138 | 0.000  | P | 920.492  | P | 418.128  | P | 320.194  | 1.523  | LOC_Os11g39020.1 |
| DG <sub>o</sub> | Os036131_01 | S1 | 1.727  | 0.000  | P | 766.216  | P | 2537.060 | P | 1892.482 | -1.304 | -                |
| DG <sub>o</sub> | Os036357_01 | S1 | 1.043  | 0.000  | P | 195.919  | P | 403.655  | P | 473.154  | -1.272 | -                |
| DG <sub>o</sub> | Os036402_01 | S1 | 1.726  | -1.246 | P | 319.259  | P | 1056.313 | P | 2506.206 | -2.973 | -                |
| DG <sub>o</sub> | Os036725_01 | S1 | 1.528  | 0.000  | P | 209.911  | P | 605.156  | P | 623.869  | -1.571 | -                |
| DG <sub>o</sub> | Os038123_01 | S1 | -1.561 | 0.000  | P | 690.171  | P | 233.926  | P | 257.266  | 1.424  | LOC_Os09g09630.1 |
| DG <sub>o</sub> | Os039822_01 | S1 | 1.504  | 0.000  | P | 435.779  | P | 1235.731 | P | 1807.529 | -2.052 | LOC_Os10g10260.1 |
| DG <sub>o</sub> | Os039861_01 | S1 | -1.082 | 0.000  | P | 410.545  | P | 193.872  | P | 151.802  | 1.435  | LOC_Os11g42490.1 |
| DG <sub>o</sub> | Os039877_01 | S1 | 1.389  | 0.000  | P | 179.023  | P | 469.005  | P | 619.201  | -1.790 | -                |
| DG <sub>o</sub> | Os040035_01 | S1 | 0.000  | 0.888  | P | 1064.551 | P | 812.026  | P | 438.711  | 1.279  | -                |
| DG <sub>o</sub> | Os040133_01 | S1 | 1.028  | -0.657 | P | 139.654  | P | 284.811  | P | 449.148  | -1.685 | LOC_Os08g37050.1 |
| DG <sub>o</sub> | Os040593_01 | S1 | 0.000  | 0.973  | P | 502.467  | P | 376.674  | P | 191.851  | 1.389  | LOC_Os01g34614.1 |
| DG <sub>o</sub> | Os040850_01 | S1 | 0.000  | 0.832  | P | 322.453  | P | 214.407  | P | 120.472  | 1.420  | LOC_Os03g30040.1 |
| DG <sub>o</sub> | Os041041_01 | S1 | 1.009  | 0.000  | P | 171.522  | P | 345.170  | P | 404.729  | -1.239 | LOC_Os03g05600.1 |
| DG <sub>o</sub> | Os041269_01 | S1 | 1.348  | 0.000  | P | 169.270  | P | 430.812  | P | 437.888  | -1.371 | LOC_Os10g01500.1 |

|                 |             |    |        |        |   |           |   |           |   |           |        |                  |
|-----------------|-------------|----|--------|--------|---|-----------|---|-----------|---|-----------|--------|------------------|
| DG <sub>0</sub> | Os042647_01 | S1 | 0.000  | 1.065  | P | 556.673   | P | 399.291   | P | 190.886   | 1.544  | LOC_Os07g03620.1 |
| DG <sub>0</sub> | Os043567_01 | S1 | 1.111  | 0.000  | P | 191.872   | P | 414.401   | P | 535.369   | -1.480 | LOC_Os11g17040.1 |
| DG <sub>0</sub> | Os043831_01 | S1 | 1.459  | 0.000  | P | 98.905    | P | 271.974   | P | 251.498   | -1.346 | -                |
| DG <sub>0</sub> | Os043894_01 | S1 | 1.534  | 0.000  | P | 117.549   | P | 340.427   | P | 467.084   | -1.990 | LOC_Os12g31000.1 |
| DG <sub>0</sub> | Os043923_01 | S1 | 2.242  | -0.816 | P | 217.861   | P | 1030.795  | P | 1814.490  | -3.058 | LOC_Os02g27160.1 |
| DG <sub>0</sub> | Os044196_01 | S1 | 1.307  | -0.724 | P | 308.682   | P | 763.698   | P | 1261.448  | -2.031 | LOC_Os05g32650.1 |
| DG <sub>0</sub> | Os044283_01 | S1 | 2.519  | 0.000  | P | 297.732   | P | 1705.974  | P | 2389.160  | -3.004 | -                |
| DG <sub>0</sub> | Os045347_01 | S1 | 3.053  | 0.000  | P | 195.087   | P | 1618.575  | P | 1676.094  | -3.103 | LOC_Os06g18120.1 |
| DG <sub>0</sub> | Os045565_01 | S1 | 2.207  | 0.000  | P | 138.581   | P | 639.684   | P | 586.593   | -2.082 | LOC_Os10g09630.1 |
| DG <sub>0</sub> | Os046160_01 | S1 | -1.046 | 0.000  | P | 553.072   | P | 267.945   | P | 237.917   | 1.217  | LOC_Os07g32440.1 |
| DG <sub>0</sub> | Os046600_01 | S1 | 1.404  | 0.000  | P | 264.388   | P | 699.759   | P | 718.110   | -1.442 | -                |
| DG <sub>0</sub> | Os047443_01 | S1 | 0.000  | 0.837  | P | 757.551   | P | 557.616   | P | 312.214   | 1.279  | LOC_Os05g18050.1 |
| DG <sub>0</sub> | Os051892_01 | S1 | -0.984 | 0.000  | P | 29094.231 | P | 14709.384 | P | 12238.363 | 1.249  | LOC_Os08g15149.1 |
| DG <sub>0</sub> | Os051974_01 | S1 | 0.000  | -1.279 | P | 1010.525  | P | 1083.530  | P | 2629.904  | -1.380 | LOC_Os01g03360.1 |
| DG <sub>0</sub> | Os052235_01 | S1 | 0.000  | 1.005  | P | 663.146   | P | 512.518   | P | 255.321   | 1.377  | LOC_Os03g24580.1 |
| DG <sub>0</sub> | Os052266_01 | S1 | 0.000  | -0.655 | P | 125.777   | P | 208.957   | P | 328.989   | -1.387 | LOC_Os01g40860.1 |
| DG <sub>0</sub> | Os052281_01 | S1 | -1.178 | 0.000  | P | 6638.018  | P | 2934.571  | P | 2573.311  | 1.367  | LOC_Os07g46460.1 |
| DG <sub>0</sub> | Os052610_01 | S1 | 1.288  | 0.000  | P | 103.557   | P | 252.895   | P | 240.721   | -1.217 | LOC_Os06g18670.1 |
| DG <sub>0</sub> | Os052960_01 | S1 | 0.000  | -1.311 | P | 230.463   | P | 330.131   | P | 819.346   | -1.830 | LOC_Os01g12110.2 |
| DG <sub>0</sub> | Os053065_01 | S1 | 0.000  | 1.035  | P | 505.074   | P | 302.239   | P | 147.466   | 1.776  | LOC_Os01g06530.1 |
| DG <sub>0</sub> | Os053489_01 | S1 | 1.060  | 0.000  | P | 232.261   | P | 484.089   | P | 730.740   | -1.654 | LOC_Os11g17480.1 |
| DG <sub>0</sub> | Os054493_01 | S1 | 1.059  | 0.000  | P | 624.814   | P | 1301.405  | P | 1417.749  | -1.182 | LOC_Os03g22810.1 |
| DG <sub>0</sub> | Os054592_01 | S1 | 1.185  | 0.000  | P | 658.599   | P | 1497.410  | P | 1875.829  | -1.510 | LOC_Os05g06310.1 |
| DG <sub>0</sub> | Os054598_01 | S1 | 1.559  | 0.000  | P | 157.898   | P | 465.191   | P | 621.687   | -1.977 | LOC_Os01g07310.1 |
| DG <sub>0</sub> | Os054626_01 | S1 | 1.016  | 0.000  | P | 221.332   | P | 447.619   | P | 667.360   | -1.592 | LOC_Os03g22810.1 |
| DG <sub>0</sub> | Os054660_01 | S1 | -1.263 | 0.000  | P | 3095.774  | P | 1289.592  | P | 975.786   | 1.666  | LOC_Os04g41560.2 |
| DG <sub>0</sub> | Os054700_01 | S1 | -1.401 | 0.000  | P | 1255.861  | P | 475.687   | P | 380.561   | 1.722  | LOC_Os07g44330.2 |
| DG <sub>0</sub> | Os055024_01 | S1 | -1.042 | 0.000  | P | 733.388   | P | 356.084   | P | 277.515   | 1.402  | LOC_Os04g53310.1 |
| DG <sub>0</sub> | Os055176_01 | S1 | 0.000  | 0.815  | P | 791.054   | P | 547.588   | P | 311.328   | 1.345  | LOC_Os07g33630.1 |
| DG <sub>0</sub> | Os055586_01 | S1 | 1.113  | 0.000  | P | 116.033   | P | 250.983   | P | 262.572   | -1.178 | LOC_Os01g15290.2 |
| DG <sub>0</sub> | Os055842_01 | S1 | 1.196  | 0.000  | P | 534.933   | P | 1225.924  | P | 1764.901  | -1.722 | LOC_Os01g54800.1 |

|                 |             |    |        |        |   |           |   |           |   |           |        |                  |
|-----------------|-------------|----|--------|--------|---|-----------|---|-----------|---|-----------|--------|------------------|
| DG <sub>o</sub> | Os056918_02 | S1 | -2.514 | 0.000  | P | 1838.523  | P | 321.838   | P | 414.269   | 2.150  | LOC_Os01g13690.1 |
| DG <sub>o</sub> | Os000040_01 | S2 | 0.000  | 1.335  | P | 4812.716  | P | 4390.947  | P | 1740.724  | 1.467  | LOC_Os01g65440.1 |
| DG <sub>o</sub> | Os000060_01 | S2 | -1.126 | 0.000  | P | 680.971   | P | 312.116   | P | 223.071   | 1.610  | LOC_Os02g42700.1 |
| DG <sub>o</sub> | Os000128_01 | S2 | 0.000  | 1.166  | P | 869.707   | P | 716.846   | P | 319.509   | 1.445  | LOC_Os06g12740.1 |
| DG <sub>o</sub> | Os000149_01 | S2 | 0.829  | 0.000  | P | 393.932   | P | 699.713   | P | 831.599   | -1.078 | LOC_Os03g51960.1 |
| DG <sub>o</sub> | Os000311_01 | S2 | 1.047  | 0.000  | P | 151.402   | P | 312.723   | P | 352.956   | -1.221 | LOC_Os03g49170.1 |
| DG <sub>o</sub> | Os000431_01 | S2 | 0.000  | -1.003 | P | 8539.232  | P | 9276.806  | P | 18598.622 | -1.123 | LOC_Os01g68300.1 |
| DG <sub>o</sub> | Os000594_01 | S2 | 1.574  | 0.000  | P | 137.948   | P | 410.795   | P | 535.090   | -1.956 | LOC_Os04g29550.1 |
| DG <sub>o</sub> | Os001058_01 | S2 | 0.808  | 0.000  | P | 362.058   | P | 633.818   | P | 725.519   | -1.003 | LOC_Os07g10540.1 |
| DG <sub>o</sub> | Os001104_01 | S2 | 0.000  | 1.045  | P | 1260.572  | P | 805.550   | P | 390.450   | 1.691  | LOC_Os01g46700.1 |
| DG <sub>o</sub> | Os001131_01 | S2 | 0.725  | 0.000  | P | 215.041   | P | 355.438   | P | 441.124   | -1.037 | LOC_Os07g43900.1 |
| DG <sub>o</sub> | Os001521_01 | S2 | -2.392 | 0.989  | P | 1340.908  | P | 255.516   | P | 128.701   | 3.381  | LOC_Os08g37140.1 |
| DG <sub>o</sub> | Os001920_01 | S2 | 0.000  | 2.399  | P | 5705.724  | P | 3740.308  | P | 709.175   | 3.008  | LOC_Os02g41580.1 |
| DG <sub>o</sub> | Os001988_01 | S2 | 0.000  | 0.854  | P | 271.466   | P | 183.760   | P | 101.698   | 1.416  | LOC_Os02g29190.1 |
| DG <sub>o</sub> | Os002004_01 | S2 | 0.807  | 0.000  | P | 231.570   | P | 405.193   | P | 465.141   | -1.006 | LOC_Os11g11810.1 |
| DG <sub>o</sub> | Os002304_01 | S2 | 0.000  | -0.854 | P | 546.554   | P | 728.736   | P | 1316.942  | -1.269 | LOC_Os02g13060.1 |
| DG <sub>o</sub> | Os002341_01 | S2 | 0.875  | 0.000  | P | 374.491   | P | 686.692   | P | 918.091   | -1.294 | LOC_Os11g09010.2 |
| DG <sub>o</sub> | Os002373_01 | S2 | 0.000  | -0.680 | P | 239.599   | P | 305.573   | P | 489.469   | -1.031 | LOC_Os10g40390.1 |
| DG <sub>o</sub> | Os002390_01 | S2 | 0.000  | 1.112  | P | 9821.673  | P | 5838.526  | P | 2700.499  | 1.863  | LOC_Os07g05360.1 |
| DG <sub>o</sub> | Os002419_01 | S2 | 0.000  | -0.674 | P | 170.632   | P | 223.383   | P | 356.318   | -1.062 | LOC_Os08g05530.1 |
| DG <sub>o</sub> | Os002658_01 | S2 | -0.911 | 0.000  | P | 485.897   | P | 258.337   | P | 166.519   | 1.545  | LOC_Os02g03530.1 |
| DG <sub>o</sub> | Os003185_01 | S2 | 0.841  | -0.768 | P | 109.873   | P | 196.816   | P | 335.239   | -1.609 | LOC_Os03g08640.1 |
| DG <sub>o</sub> | Os003390_01 | S2 | 0.768  | -0.687 | P | 412.598   | P | 702.629   | P | 1131.117  | -1.455 | LOC_Os05g32390.1 |
| DG <sub>o</sub> | Os003434_01 | S2 | -1.450 | 0.000  | P | 595.983   | P | 218.169   | P | 223.901   | 1.412  | LOC_Os03g48170.1 |
| DG <sub>o</sub> | Os004249_01 | S2 | 0.000  | 1.641  | P | 462.328   | P | 400.687   | P | 128.456   | 1.848  | LOC_Os11g47140.1 |
| DG <sub>o</sub> | Os004343_01 | S2 | 0.996  | 0.000  | P | 219.900   | P | 438.601   | P | 583.246   | -1.407 | LOC_Os06g14030.1 |
| DG <sub>o</sub> | Os004399_01 | S2 | 0.000  | 2.316  | P | 1562.590  | P | 980.961   | P | 197.025   | 2.987  | LOC_Os02g40180.1 |
| DG <sub>o</sub> | Os005136_01 | S2 | 0.000  | -0.684 | P | 173.741   | P | 260.654   | P | 418.890   | -1.270 | LOC_Os04g31120.6 |
| DG <sub>o</sub> | Os005767_01 | S2 | 0.000  | -0.650 | P | 18623.435 | P | 24846.606 | P | 38981.765 | -1.066 | LOC_Os02g47744.4 |
| DG <sub>o</sub> | Os006506_01 | S2 | 1.002  | 0.000  | P | 143.393   | P | 287.222   | P | 356.571   | -1.314 | LOC_Os02g06290.1 |
| DG <sub>o</sub> | Os008169_01 | S2 | -1.221 | 1.080  | P | 1563.154  | P | 670.691   | P | 317.158   | 2.301  | LOC_Os02g40240.2 |

|                 |             |    |        |        |   |          |   |          |   |           |        |                  |
|-----------------|-------------|----|--------|--------|---|----------|---|----------|---|-----------|--------|------------------|
| DG <sub>o</sub> | Os008400_01 | S2 | -0.877 | 0.000  | P | 1263.825 | P | 688.378  | P | 473.356   | 1.417  | LOC_Os02g57720.1 |
| DG <sub>o</sub> | Os008441_01 | S2 | 0.000  | 0.929  | P | 620.052  | P | 395.600  | P | 207.758   | 1.577  | LOC_Os03g49190.1 |
| DG <sub>o</sub> | Os008529_01 | S2 | 1.468  | 0.000  | P | 229.908  | P | 635.877  | P | 828.697   | -1.850 | LOC_Os07g02210.2 |
| DG <sub>o</sub> | Os008556_01 | S2 | 0.000  | -0.644 | P | 3047.467 | P | 3908.624 | P | 6109.320  | -1.003 | LOC_Os02g44630.2 |
| DG <sub>o</sub> | Os008853_01 | S2 | 0.000  | -0.766 | P | 227.477  | P | 310.795  | P | 528.388   | -1.216 | LOC_Os06g10620.1 |
| DG <sub>o</sub> | Os008934_01 | S2 | 0.000  | -0.749 | P | 246.582  | P | 373.254  | P | 627.401   | -1.347 | LOC_Os02g15640.1 |
| DG <sub>o</sub> | Os008961_01 | S2 | 0.746  | 0.000  | P | 277.846  | P | 465.851  | P | 601.809   | -1.115 | -                |
| DG <sub>o</sub> | Os009024_01 | S2 | 0.000  | -0.754 | P | 552.643  | P | 785.035  | P | 1324.264  | -1.261 | LOC_Os07g08710.2 |
| DG <sub>o</sub> | Os009220_01 | S2 | 1.034  | 0.000  | P | 161.893  | P | 331.437  | P | 351.755   | -1.120 | LOC_Os03g50210.1 |
| DG <sub>o</sub> | Os009234_01 | S2 | 0.819  | 0.000  | P | 2640.032 | P | 4656.287 | P | 6056.968  | -1.198 | LOC_Os08g06530.1 |
| DG <sub>o</sub> | Os009448_01 | S2 | 0.756  | 0.000  | P | 5892.618 | P | 9950.476 | P | 14471.962 | -1.296 | LOC_Os08g02630.1 |
| DG <sub>o</sub> | Os009500_01 | S2 | 0.996  | 0.000  | P | 158.325  | P | 315.838  | P | 367.741   | -1.216 | LOC_Os08g32850.2 |
| DG <sub>o</sub> | Os009518_01 | S2 | 0.803  | 0.000  | P | 5031.132 | P | 8775.875 | P | 11337.086 | -1.172 | LOC_Os01g73250.1 |
| DG <sub>o</sub> | Os009547_01 | S2 | 1.025  | 0.000  | P | 180.377  | P | 367.108  | P | 407.847   | -1.177 | LOC_Os01g13570.1 |
| DG <sub>o</sub> | Os009592_01 | S2 | 0.976  | 0.000  | P | 505.379  | P | 994.172  | P | 1375.536  | -1.445 | LOC_Os05g40180.1 |
| DG <sub>o</sub> | Os009657_01 | S2 | 1.362  | 0.000  | P | 512.905  | P | 1318.564 | P | 1903.777  | -1.892 | LOC_Os08g01140.1 |
| DG <sub>o</sub> | Os010073_01 | S2 | 2.043  | 0.000  | P | 284.179  | P | 1170.810 | P | 1613.195  | -2.505 | LOC_Os07g40986.1 |
| DG <sub>o</sub> | Os010136_01 | S2 | 0.000  | 1.554  | P | 778.352  | P | 537.416  | P | 182.994   | 2.089  | LOC_Os11g06730.1 |
| DG <sub>o</sub> | Os010147_01 | S2 | 0.000  | 1.348  | P | 4786.666 | P | 4871.167 | P | 1913.979  | 1.322  | LOC_Os12g43670.1 |
| DG <sub>o</sub> | Os010292_01 | S2 | 0.000  | -1.508 | P | 2170.424 | P | 1780.101 | P | 5064.050  | -1.222 | LOC_Os07g04960.1 |
| DG <sub>o</sub> | Os010652_01 | S2 | -1.182 | 0.000  | P | 1054.527 | P | 464.902  | P | 350.553   | 1.589  | -                |
| DG <sub>o</sub> | Os010733_01 | S2 | 0.000  | -0.738 | P | 176.158  | P | 247.110  | P | 412.185   | -1.226 | -                |
| DG <sub>o</sub> | Os010825_01 | S2 | 0.953  | 0.000  | P | 112.283  | P | 217.298  | P | 270.836   | -1.270 | LOC_Os03g46640.2 |
| DG <sub>o</sub> | Os010912_01 | S2 | 0.000  | 1.045  | P | 520.237  | P | 369.368  | P | 179.058   | 1.539  | LOC_Os06g23870.1 |
| DG <sub>o</sub> | Os011230_01 | S2 | 0.000  | 1.280  | P | 407.785  | P | 396.186  | P | 163.107   | 1.322  | LOC_Os08g10570.2 |
| DG <sub>o</sub> | Os011344_01 | S2 | -1.205 | 0.951  | P | 1173.029 | P | 508.933  | P | 263.304   | 2.155  | -                |
| DG <sub>o</sub> | Os011457_01 | S2 | 1.051  | 0.000  | P | 294.959  | P | 610.987  | P | 613.299   | -1.056 | LOC_Os05g47880.1 |
| DG <sub>o</sub> | Os011561_01 | S2 | -1.602 | 0.000  | P | 1317.873 | P | 434.274  | P | 473.769   | 1.476  | LOC_Os09g10340.1 |
| DG <sub>o</sub> | Os012005_01 | S2 | -0.803 | 1.414  | P | 1121.626 | P | 642.771  | P | 241.186   | 2.217  | LOC_Os03g58640.1 |
| DG <sub>o</sub> | Os012415_01 | S2 | 0.744  | 0.000  | P | 507.730  | P | 850.209  | P | 1142.878  | -1.171 | LOC_Os03g57310.1 |
| DG <sub>o</sub> | Os012754_01 | S2 | 0.000  | 0.823  | P | 240.610  | P | 176.230  | P | 99.651    | 1.272  | LOC_Os03g45400.1 |

|                 |             |    |        |        |   |           |   |          |   |          |        |                  |
|-----------------|-------------|----|--------|--------|---|-----------|---|----------|---|----------|--------|------------------|
| DG <sub>o</sub> | Os013058_01 | S2 | -0.799 | 0.000  | P | 379.223   | P | 217.885  | P | 125.085  | 1.600  | LOC_Os04g05010.1 |
| DG <sub>o</sub> | Os013285_01 | S2 | -1.045 | 0.000  | P | 546.769   | P | 264.909  | P | 185.422  | 1.560  | LOC_Os04g46740.1 |
| DG <sub>o</sub> | Os013356_01 | S2 | 1.962  | 0.000  | P | 240.144   | P | 935.682  | P | 1157.535 | -2.269 | LOC_Os07g40974.1 |
| DG <sub>o</sub> | Os013447_01 | S2 | -0.929 | 0.000  | P | 321.951   | P | 169.130  | P | 122.831  | 1.390  | LOC_Os02g34600.1 |
| DG <sub>o</sub> | Os013541_01 | S2 | 2.081  | 0.000  | P | 134.176   | P | 567.656  | P | 705.633  | -2.395 | LOC_Os10g22510.1 |
| DG <sub>o</sub> | Os014164_01 | S2 | 1.635  | 0.000  | P | 148.740   | P | 462.044  | P | 468.524  | -1.655 | LOC_Os04g57700.2 |
| DG <sub>o</sub> | Os014195_01 | S2 | -0.881 | 0.000  | P | 354.018   | P | 192.287  | P | 137.672  | 1.363  | -                |
| DG <sub>o</sub> | Os014307_01 | S2 | 0.000  | 0.933  | P | 809.647   | P | 499.643  | P | 261.652  | 1.630  | LOC_Os07g32630.1 |
| DG <sub>o</sub> | Os014603_01 | S2 | -1.119 | 0.000  | P | 786.333   | P | 362.003  | P | 237.318  | 1.728  | LOC_Os01g55870.1 |
| DG <sub>o</sub> | Os015095_01 | S2 | 1.508  | 0.000  | P | 182.352   | P | 518.699  | P | 450.245  | -1.304 | LOC_Os01g73450.1 |
| DG <sub>o</sub> | Os015144_01 | S2 | -2.107 | 0.000  | P | 12387.772 | P | 2874.631 | P | 2017.614 | 2.618  | LOC_Os03g26650.2 |
| DG <sub>o</sub> | Os015656_01 | S2 | 1.063  | 0.000  | P | 304.908   | P | 636.986  | P | 915.257  | -1.586 | LOC_Os07g41280.3 |
| DG <sub>o</sub> | Os015718_01 | S2 | -1.135 | 0.000  | P | 399.363   | P | 181.877  | P | 143.953  | 1.472  | LOC_Os11g05740.1 |
| DG <sub>o</sub> | Os015750_01 | S2 | 2.726  | 0.000  | P | 88.004    | P | 582.127  | P | 669.256  | -2.927 | LOC_Os10g42870.1 |
| DG <sub>o</sub> | Os016132_01 | S2 | 1.268  | -0.823 | P | 176.172   | P | 424.215  | P | 750.238  | -2.090 | LOC_Os04g14190.1 |
| DG <sub>o</sub> | Os016309_01 | S2 | 0.869  | 0.000  | P | 710.810   | P | 1297.788 | P | 1626.077 | -1.194 | LOC_Os10g28360.1 |
| DG <sub>o</sub> | Os016453_01 | S2 | -1.101 | 0.000  | P | 340.185   | P | 158.644  | P | 138.843  | 1.293  | LOC_Os06g36210.1 |
| DG <sub>o</sub> | Os016841_01 | S2 | -0.985 | 0.000  | P | 946.330   | P | 478.009  | P | 283.504  | 1.739  | LOC_Os07g33650.3 |
| DG <sub>o</sub> | Os017372_01 | S2 | -1.067 | 1.335  | P | 1425.861  | P | 680.567  | P | 269.731  | 2.402  | LOC_Os11g45720.1 |
| DG <sub>o</sub> | Os017433_01 | S2 | -2.615 | 3.389  | P | 18899.282 | P | 3084.458 | P | 294.415  | 6.004  | LOC_Os02g51570.1 |
| DG <sub>o</sub> | Os017568_01 | S2 | 0.000  | 1.139  | P | 395.621   | P | 290.265  | P | 131.761  | 1.586  | LOC_Os03g43590.1 |
| DG <sub>o</sub> | Os017704_01 | S2 | -1.506 | 0.943  | P | 659.308   | P | 232.111  | P | 120.732  | 2.449  | LOC_Os02g07200.3 |
| DG <sub>o</sub> | Os018221_01 | S2 | 0.000  | -1.649 | P | 930.686   | P | 814.782  | P | 2554.555 | -1.457 | -                |
| DG <sub>o</sub> | Os018264_01 | S2 | -2.399 | 0.000  | P | 2501.313  | P | 474.389  | P | 378.456  | 2.724  | LOC_Os08g41320.1 |
| DG <sub>o</sub> | Os018414_01 | S2 | 0.000  | 1.272  | P | 3151.130  | P | 2484.985 | P | 1029.023 | 1.615  | LOC_Os07g28910.1 |
| DG <sub>o</sub> | Os019000_01 | S2 | 0.000  | 0.987  | P | 301.864   | P | 225.901  | P | 113.976  | 1.405  | LOC_Os08g02250.1 |
| DG <sub>o</sub> | Os019163_01 | S2 | -0.811 | 0.000  | P | 1920.132  | P | 1094.379 | P | 680.024  | 1.498  | LOC_Os01g08560.2 |
| DG <sub>o</sub> | Os019169_01 | S2 | 0.000  | 0.912  | P | 1511.350  | P | 1065.184 | P | 566.020  | 1.417  | LOC_Os10g02630.1 |
| DG <sub>o</sub> | Os019869_01 | S2 | 0.000  | 0.913  | P | 3050.250  | P | 2076.842 | P | 1103.340 | 1.467  | LOC_Os01g61460.1 |
| DG <sub>o</sub> | Os019947_01 | S2 | -0.990 | 1.076  | P | 382.073   | P | 192.382  | P | 91.256   | 2.066  | LOC_Os11g12050.2 |
| DG <sub>o</sub> | Os020208_01 | S2 | 0.000  | 0.961  | P | 244.063   | P | 176.379  | P | 90.619   | 1.429  | LOC_Os05g11730.1 |



|                 |             |    |        |        |   |          |   |          |   |          |        |                  |
|-----------------|-------------|----|--------|--------|---|----------|---|----------|---|----------|--------|------------------|
| DG <sub>0</sub> | Os020291_01 | S2 | -1.093 | 0.000  | P | 1715.420 | P | 804.275  | P | 702.917  | 1.287  | LOC_Os09g24640.1 |
| DG <sub>0</sub> | Os020363_01 | S2 | -1.181 | 0.840  | P | 568.489  | P | 250.688  | P | 140.027  | 2.021  | LOC_Os02g21260.1 |
| DG <sub>0</sub> | Os020706_01 | S2 | 0.000  | 1.028  | P | 357.544  | P | 226.507  | P | 111.097  | 1.686  | LOC_Os02g18660.1 |
| DG <sub>0</sub> | Os020946_01 | S2 | 0.000  | 1.201  | P | 386.400  | P | 258.414  | P | 112.409  | 1.781  | LOC_Os11g09180.2 |
| DG <sub>0</sub> | Os021187_01 | S2 | 0.000  | -0.920 | P | 976.065  | P | 1491.443 | P | 2822.543 | -1.532 | LOC_Os03g49260.1 |
| DG <sub>0</sub> | Os021870_01 | S2 | 1.578  | 0.000  | P | 279.100  | P | 833.458  | P | 979.585  | -1.811 | LOC_Os07g41060.1 |
| DG <sub>0</sub> | Os023487_01 | S2 | 0.000  | 1.183  | P | 304.374  | P | 288.438  | P | 127.008  | 1.261  | LOC_Os03g25490.1 |
| DG <sub>0</sub> | Os023616_01 | S2 | 0.000  | 1.105  | P | 404.420  | P | 296.069  | P | 137.681  | 1.555  | LOC_Os06g46740.1 |
| DG <sub>0</sub> | Os023652_01 | S2 | 0.000  | 0.871  | P | 422.626  | P | 245.649  | P | 134.311  | 1.654  | LOC_Os04g52750.1 |
| DG <sub>0</sub> | Os023830_01 | S2 | 0.000  | 0.827  | P | 1067.107 | P | 778.852  | P | 438.974  | 1.281  | LOC_Os02g40800.1 |
| DG <sub>0</sub> | Os023918_01 | S2 | -0.864 | 0.000  | P | 652.126  | P | 358.304  | P | 216.143  | 1.593  | LOC_Os05g12670.1 |
| DG <sub>0</sub> | Os024274_01 | S2 | 2.069  | -0.674 | P | 309.280  | P | 1298.038 | P | 2070.646 | -2.743 | LOC_Os08g07100.1 |
| DG <sub>0</sub> | Os024276_01 | S2 | 1.817  | 0.000  | P | 1572.331 | P | 5541.021 | P | 3478.361 | -1.146 | -                |
| DG <sub>0</sub> | Os024393_01 | S2 | 0.000  | 1.164  | P | 812.917  | P | 566.814  | P | 252.925  | 1.684  | LOC_Os01g14960.1 |
| DG <sub>0</sub> | Os024723_01 | S2 | 0.000  | 0.859  | P | 1498.227 | P | 923.793  | P | 509.186  | 1.557  | LOC_Os11g05490.1 |
| DG <sub>0</sub> | Os024982_01 | S2 | 0.000  | 0.972  | P | 2184.603 | P | 1292.585 | P | 658.935  | 1.729  | LOC_Os08g05480.1 |
| DG <sub>0</sub> | Os025974_01 | S2 | -1.378 | 0.000  | P | 1127.359 | P | 433.648  | P | 449.556  | 1.326  | LOC_Os03g53060.1 |
| DG <sub>0</sub> | Os026160_01 | S2 | -0.966 | 0.000  | P | 579.118  | P | 296.430  | P | 241.256  | 1.263  | LOC_Os01g14650.1 |
| DG <sub>0</sub> | Os026172_01 | S2 | 0.000  | -0.843 | P | 614.065  | P | 732.591  | P | 1314.373 | -1.098 | LOC_Os03g19170.1 |
| DG <sub>0</sub> | Os026390_01 | S2 | 0.902  | 0.000  | P | 309.343  | P | 578.039  | P | 676.560  | -1.129 | LOC_Os05g25040.2 |
| DG <sub>0</sub> | Os027934_01 | S2 | 0.864  | -0.675 | P | 131.838  | P | 239.972  | P | 383.099  | -1.539 | LOC_Os06g06270.1 |
| DG <sub>0</sub> | Os028157_01 | S2 | -0.992 | 0.980  | P | 1172.796 | P | 589.610  | P | 299.020  | 1.972  | LOC_Os10g32110.1 |
| DG <sub>0</sub> | Os028680_01 | S2 | 2.504  | -0.689 | P | 179.856  | P | 1020.396 | P | 1645.210 | -3.193 | LOC_Os07g06100.1 |
| DG <sub>0</sub> | Os028705_01 | S2 | 0.943  | 0.000  | P | 237.199  | P | 455.974  | P | 502.982  | -1.084 | LOC_Os05g09400.1 |
| DG <sub>0</sub> | Os028782_01 | S2 | 0.000  | -0.908 | P | 312.915  | P | 361.409  | P | 678.065  | -1.116 | LOC_Os11g12810.1 |
| DG <sub>0</sub> | Os028807_01 | S2 | 0.000  | 1.453  | P | 774.496  | P | 494.815  | P | 180.762  | 2.099  | -                |
| DG <sub>0</sub> | Os029109_01 | S2 | 0.000  | 1.298  | P | 469.463  | P | 356.053  | P | 144.844  | 1.697  | LOC_Os12g01720.1 |
| DG <sub>0</sub> | Os029140_01 | S2 | 0.000  | -1.084 | P | 783.868  | P | 862.923  | P | 1829.168 | -1.223 | LOC_Os08g01520.1 |
| DG <sub>0</sub> | Os029823_01 | S2 | 0.000  | 0.874  | P | 813.852  | P | 568.425  | P | 310.121  | 1.392  | -                |
| DG <sub>0</sub> | Os029975_01 | S2 | 1.024  | 0.000  | P | 115.603  | P | 235.129  | P | 244.721  | -1.082 | -                |
| DG <sub>0</sub> | Os029980_01 | S2 | 1.570  | 0.000  | P | 114.013  | P | 338.419  | P | 487.713  | -2.097 | LOC_Os02g42450.1 |

|                 |             |    |        |        |   |          |   |          |   |          |        |                  |
|-----------------|-------------|----|--------|--------|---|----------|---|----------|---|----------|--------|------------------|
| DG <sub>0</sub> | Os030024_01 | S2 | 0.000  | -0.912 | P | 522.622  | P | 626.676  | P | 1178.888 | -1.174 | LOC_Os05g49310.1 |
| DG <sub>0</sub> | Os030162_01 | S2 | 0.000  | 0.941  | P | 1145.618 | P | 770.736  | P | 401.354  | 1.513  | LOC_Os04g51760.1 |
| DG <sub>0</sub> | Os030344_01 | S2 | 0.000  | 0.843  | P | 858.248  | P | 635.734  | P | 354.488  | 1.276  | LOC_Os12g43820.1 |
| DG <sub>0</sub> | Os030442_01 | S2 | 1.241  | 0.000  | P | 2015.025 | P | 4762.942 | P | 5046.563 | -1.325 | LOC_Os06g10290.1 |
| DG <sub>0</sub> | Os030543_01 | S2 | 0.000  | -0.681 | P | 4136.239 | P | 5197.734 | P | 8330.665 | -1.010 | LOC_Os09g16240.1 |
| DG <sub>0</sub> | Os030589_01 | S2 | -0.866 | 0.000  | P | 296.826  | P | 162.844  | P | 101.479  | 1.548  | LOC_Os10g08990.1 |
| DG <sub>0</sub> | Os030672_01 | S2 | 0.000  | 0.901  | P | 350.264  | P | 248.063  | P | 132.804  | 1.399  | LOC_Os08g40120.1 |
| DG <sub>0</sub> | Os030681_01 | S2 | 0.000  | -0.656 | P | 238.417  | P | 320.336  | P | 504.701  | -1.082 | LOC_Os07g34390.1 |
| DG <sub>0</sub> | Os030882_01 | S2 | 0.763  | -0.681 | P | 243.516  | P | 413.203  | P | 662.403  | -1.444 | LOC_Os02g57810.1 |
| DG <sub>0</sub> | Os030972_01 | S2 | 0.000  | -0.797 | P | 388.610  | P | 467.561  | P | 812.642  | -1.064 | LOC_Os05g33870.1 |
| DG <sub>0</sub> | Os031721_01 | S2 | 0.000  | 0.823  | P | 368.330  | P | 213.677  | P | 120.792  | 1.608  | -                |
| DG <sub>0</sub> | Os032055_01 | S2 | 0.000  | -0.993 | P | 1187.343 | P | 1220.573 | P | 2429.585 | -1.033 | LOC_Os06g15750.1 |
| DG <sub>0</sub> | Os032267_01 | S2 | 0.000  | 2.443  | P | 1518.319 | P | 963.203  | P | 177.171  | 3.099  | LOC_Os06g08690.1 |
| DG <sub>0</sub> | Os032650_01 | S2 | 1.448  | -0.745 | P | 137.566  | P | 375.352  | P | 628.953  | -2.193 | -                |
| DG <sub>0</sub> | Os034759_01 | S2 | 0.000  | 0.856  | P | 3425.374 | P | 2279.533 | P | 1259.617 | 1.443  | LOC_Os04g13090.1 |
| DG <sub>0</sub> | Os035088_01 | S2 | 1.304  | 0.000  | P | 934.635  | P | 2307.388 | P | 2484.580 | -1.411 | LOC_Os05g04990.1 |
| DG <sub>0</sub> | Os035261_01 | S2 | 0.898  | -0.711 | P | 738.266  | P | 1375.278 | P | 2250.561 | -1.608 | LOC_Os06g14324.1 |
| DG <sub>0</sub> | Os035342_01 | S2 | 0.000  | 0.995  | P | 466.418  | P | 347.369  | P | 174.302  | 1.420  | LOC_Os12g21870.1 |
| DG <sub>0</sub> | Os035864_01 | S2 | 0.000  | -0.841 | P | 991.099  | P | 1558.614 | P | 2791.736 | -1.494 | LOC_Os11g35120.1 |
| DG <sub>0</sub> | Os035877_01 | S2 | 0.000  | 0.919  | P | 508.707  | P | 355.075  | P | 187.753  | 1.438  | -                |
| DG <sub>0</sub> | Os036907_01 | S2 | -1.036 | 0.921  | P | 2409.611 | P | 1174.857 | P | 620.496  | 1.957  | LOC_Os05g48780.1 |
| DG <sub>0</sub> | Os037041_01 | S2 | 0.000  | 1.651  | P | 678.605  | P | 489.095  | P | 155.784  | 2.123  | -                |
| DG <sub>0</sub> | Os038164_01 | S2 | 0.739  | 0.000  | P | 145.216  | P | 242.341  | P | 344.346  | -1.246 | LOC_Os03g11670.1 |
| DG <sub>0</sub> | Os038937_01 | S2 | 1.009  | 0.000  | P | 246.553  | P | 496.337  | P | 590.718  | -1.261 | LOC_Os06g41680.1 |
| DG <sub>0</sub> | Os039430_01 | S2 | 1.888  | 0.000  | P | 338.052  | P | 1251.617 | P | 1708.953 | -2.338 | LOC_Os08g07080.1 |
| DG <sub>0</sub> | Os039580_01 | S2 | 0.000  | 2.316  | P | 1303.830 | P | 764.514  | P | 153.482  | 3.087  | LOC_Os02g40180.1 |
| DG <sub>0</sub> | Os039771_01 | S2 | 0.000  | 1.496  | P | 645.807  | P | 430.401  | P | 152.601  | 2.081  | LOC_Os01g24970.1 |
| DG <sub>0</sub> | Os039994_01 | S2 | 0.000  | -1.133 | P | 1026.218 | P | 1170.785 | P | 2567.878 | -1.323 | LOC_Os07g04790.1 |
| DG <sub>0</sub> | Os040062_01 | S2 | 0.000  | 0.905  | P | 351.172  | P | 264.123  | P | 141.023  | 1.316  | -                |
| DG <sub>0</sub> | Os040246_01 | S2 | -0.871 | 0.000  | P | 1657.855 | P | 906.765  | P | 652.181  | 1.346  | LOC_Os08g44670.1 |
| DG <sub>0</sub> | Os040304_01 | S2 | -0.945 | 1.765  | P | 775.487  | P | 402.743  | P | 118.465  | 2.711  | LOC_Os04g06879.1 |

|                 |             |    |        |        |   |           |   |          |   |           |        |                  |
|-----------------|-------------|----|--------|--------|---|-----------|---|----------|---|-----------|--------|------------------|
| DG <sub>o</sub> | Os040841_01 | S2 | 0.000  | 2.006  | P | 2128.903  | P | 1262.819 | P | 314.350   | 2.760  | LOC_Os05g38390.1 |
| DG <sub>o</sub> | Os041088_01 | S2 | 0.872  | 0.000  | P | 185.406   | P | 339.293  | P | 483.452   | -1.383 | LOC_Os05g17110.1 |
| DG <sub>o</sub> | Os041269_01 | S2 | 0.970  | 0.000  | P | 130.795   | P | 256.200  | P | 312.917   | -1.258 | LOC_Os10g01500.1 |
| DG <sub>o</sub> | Os041794_01 | S2 | -0.967 | 0.000  | P | 348.401   | P | 178.230  | P | 118.801   | 1.552  | -                |
| DG <sub>o</sub> | Os042013_01 | S2 | 0.889  | -1.073 | P | 5017.977  | P | 9292.308 | P | 19546.938 | -1.962 | LOC_Os08g19330.1 |
| DG <sub>o</sub> | Os042188_01 | S2 | 0.000  | 1.046  | P | 373.566   | P | 309.913  | P | 150.128   | 1.315  | LOC_Os03g18620.1 |
| DG <sub>o</sub> | Os042994_01 | S2 | 0.886  | 0.000  | P | 172.537   | P | 318.940  | P | 387.412   | -1.167 | LOC_Os05g31090.1 |
| DG <sub>o</sub> | Os043530_01 | S2 | -1.180 | 0.000  | P | 5869.931  | P | 2591.322 | P | 1920.801  | 1.612  | LOC_Os06g06340.1 |
| DG <sub>o</sub> | Os043715_01 | S2 | 0.789  | 0.000  | P | 122.112   | P | 210.951  | P | 275.245   | -1.173 | LOC_Os10g39070.1 |
| DG <sub>o</sub> | Os043716_01 | S2 | 0.735  | 0.000  | P | 256.806   | P | 427.491  | P | 540.181   | -1.073 | LOC_Os06g36530.1 |
| DG <sub>o</sub> | Os043831_01 | S2 | 0.728  | 0.000  | P | 133.125   | P | 220.430  | P | 308.035   | -1.210 | -                |
| DG <sub>o</sub> | Os043838_01 | S2 | -0.877 | 0.000  | P | 327.560   | P | 178.335  | P | 131.735   | 1.314  | LOC_Os05g14480.1 |
| DG <sub>o</sub> | Os044218_01 | S2 | 0.000  | -1.086 | P | 271.490   | P | 377.437  | P | 801.337   | -1.562 | LOC_Os01g24050.1 |
| DG <sub>o</sub> | Os044283_01 | S2 | 1.018  | 0.000  | P | 501.701   | P | 1016.255 | P | 1248.025  | -1.315 | -                |
| DG <sub>o</sub> | Os044300_01 | S2 | 0.000  | 1.009  | P | 10131.427 | P | 6656.818 | P | 3307.853  | 1.615  | LOC_Os05g11320.1 |
| DG <sub>o</sub> | Os044395_01 | S2 | -0.936 | 1.157  | P | 3154.148  | P | 1648.931 | P | 739.374   | 2.093  | LOC_Os01g32630.1 |
| DG <sub>o</sub> | Os044515_01 | S2 | 0.000  | -0.845 | P | 233.360   | P | 304.548  | P | 546.946   | -1.229 | LOC_Os06g19130.1 |
| DG <sub>o</sub> | Os044617_01 | S2 | 0.934  | -1.124 | P | 866.934   | P | 1656.689 | P | 3609.704  | -2.058 | -                |
| DG <sub>o</sub> | Os044729_01 | S2 | 0.000  | 1.236  | P | 615.344   | P | 405.013  | P | 171.997   | 1.839  | LOC_Os05g30200.1 |
| DG <sub>o</sub> | Os045347_01 | S2 | 1.849  | 0.000  | P | 417.781   | P | 1505.154 | P | 1720.585  | -2.042 | LOC_Os06g18120.1 |
| DG <sub>o</sub> | Os045565_01 | S2 | 4.005  | 0.000  | P | 302.214   | P | 4851.626 | P | 6260.743  | -4.373 | LOC_Os10g09630.1 |
| DG <sub>o</sub> | Os045632_01 | S2 | 0.000  | 1.018  | P | 3376.181  | P | 2285.187 | P | 1128.400  | 1.581  | LOC_Os07g18070.1 |
| DG <sub>o</sub> | Os047396_01 | S2 | 0.752  | 0.000  | P | 176.987   | P | 298.065  | P | 414.653   | -1.228 | LOC_Os05g02350.1 |
| DG <sub>o</sub> | Os047560_01 | S2 | 0.000  | 1.348  | P | 881.225   | P | 652.796  | P | 256.364   | 1.781  | LOC_Os07g12890.1 |
| DG <sub>o</sub> | Os048713_01 | S2 | 0.000  | 0.899  | P | 3309.079  | P | 2394.151 | P | 1284.036  | 1.366  | LOC_Os11g27090.1 |
| DG <sub>o</sub> | Os048756_01 | S2 | -1.178 | 1.637  | P | 762.188   | P | 336.768  | P | 108.290   | 2.815  | LOC_Os06g23780.1 |
| DG <sub>o</sub> | Os049068_01 | S2 | 0.000  | 0.846  | P | 602.806   | P | 443.051  | P | 246.424   | 1.291  | -                |
| DG <sub>o</sub> | Os049284_01 | S2 | 0.000  | -0.778 | P | 149.833   | P | 194.615  | P | 333.681   | -1.155 | LOC_Os01g05310.1 |
| DG <sub>o</sub> | Os051859_01 | S2 | -1.161 | 2.551  | P | 1877.310  | P | 839.796  | P | 143.295   | 3.712  | -                |
| DG <sub>o</sub> | Os051935_01 | S2 | 0.845  | -0.681 | P | 738.975   | P | 1327.060 | P | 2127.481  | -1.526 | LOC_Os01g15270.1 |
| DG <sub>o</sub> | Os052084_01 | S2 | -1.372 | 0.000  | P | 1061.642  | P | 410.274  | P | 284.808   | 1.898  | LOC_Os11g32650.1 |

|                 |             |    |        |        |   |          |   |          |   |          |        |                  |
|-----------------|-------------|----|--------|--------|---|----------|---|----------|---|----------|--------|------------------|
| DG <sub>o</sub> | Os052123_01 | S2 | 0.000  | -0.803 | P | 577.587  | P | 836.220  | P | 1459.073 | -1.337 | LOC_Os06g04920.1 |
| DG <sub>o</sub> | Os052203_01 | S2 | 0.946  | 0.000  | P | 114.163  | P | 219.904  | P | 283.817  | -1.314 | LOC_Os03g07480.2 |
| DG <sub>o</sub> | Os052911_01 | S2 | 3.762  | 0.000  | P | 524.754  | P | 7121.497 | P | 5168.331 | -3.300 | LOC_Os08g04500.1 |
| DG <sub>o</sub> | Os053144_01 | S2 | 1.647  | 0.000  | P | 356.065  | P | 1114.999 | P | 1631.006 | -2.196 | LOC_Os01g65169.1 |
| DG <sub>o</sub> | Os053343_01 | S2 | -0.985 | 0.856  | P | 670.632  | P | 338.876  | P | 187.279  | 1.840  | LOC_Os03g25500.1 |
| DG <sub>o</sub> | Os053917_01 | S2 | 0.000  | 1.025  | P | 527.301  | P | 413.910  | P | 203.450  | 1.374  | LOC_Os01g67540.1 |
| DG <sub>o</sub> | Os054056_01 | S2 | 0.000  | 1.019  | P | 1315.786 | P | 906.471  | P | 447.210  | 1.557  | LOC_Os07g03050.1 |
| DG <sub>o</sub> | Os054977_01 | S2 | 0.000  | 1.017  | P | 795.624  | P | 669.423  | P | 330.790  | 1.266  | LOC_Os01g59970.1 |
| DG <sub>o</sub> | Os055155_01 | S2 | 0.000  | 0.854  | P | 729.891  | P | 475.026  | P | 262.829  | 1.474  | LOC_Os12g10220.1 |
| DG <sub>o</sub> | Os055646_01 | S2 | -0.897 | 1.332  | P | 830.017  | P | 445.845  | P | 177.047  | 2.229  | LOC_Os12g29670.1 |
| DG <sub>o</sub> | Os056551_01 | S2 | 0.798  | 0.000  | P | 156.058  | P | 271.326  | P | 359.182  | -1.203 | LOC_Os08g37810.1 |
| DG <sub>o</sub> | Os056638_01 | S2 | 0.000  | -0.669 | P | 176.446  | P | 246.846  | P | 392.460  | -1.153 | -                |
| DG <sub>o</sub> | Os056762_01 | S2 | 0.778  | 0.000  | P | 1178.898 | P | 2021.744 | P | 2554.277 | -1.115 | LOC_Os03g39830.1 |
| DG <sub>o</sub> | Os056923_02 | S2 | 1.294  | 0.000  | P | 109.460  | P | 268.435  | P | 343.304  | -1.649 | LOC_Os02g06584.2 |
| DG <sub>o</sub> | Os057211_02 | S2 | 0.797  | 0.000  | P | 432.234  | P | 751.171  | P | 1151.482 | -1.414 | LOC_Os01g05970.1 |
| DG <sub>o</sub> | Os057647_02 | S2 | 2.884  | 0.000  | P | 95.651   | P | 706.280  | P | 983.544  | -3.362 | -                |
| DG <sub>o</sub> | Os000119_01 | S3 | 0.000  | -1.239 | P | 135.497  | P | 199.561  | P | 471.055  | -1.798 | LOC_Os03g24339.1 |
| DG <sub>o</sub> | Os000380_01 | S3 | -1.258 | 1.844  | P | 2334.250 | P | 975.700  | P | 271.797  | 3.102  | LOC_Os05g47540.1 |
| DG <sub>o</sub> | Os000400_01 | S3 | 1.319  | 0.000  | P | 192.885  | P | 481.122  | P | 705.572  | -1.871 | -                |
| DG <sub>o</sub> | Os000423_01 | S3 | 1.398  | 0.000  | P | 221.607  | P | 583.997  | P | 899.803  | -2.022 | LOC_Os02g52860.1 |
| DG <sub>o</sub> | Os000515_01 | S3 | 1.193  | 0.000  | P | 286.816  | P | 655.946  | P | 1011.071 | -1.818 | LOC_Os02g03010.1 |
| DG <sub>o</sub> | Os000540_01 | S3 | 0.000  | -1.091 | P | 135.351  | P | 196.875  | P | 419.356  | -1.631 | LOC_Os09g32470.1 |
| DG <sub>o</sub> | Os000586_01 | S3 | 1.210  | 0.000  | P | 123.952  | P | 286.733  | P | 435.509  | -1.813 | LOC_Os09g11510.1 |
| DG <sub>o</sub> | Os001046_01 | S3 | 0.000  | -1.335 | P | 147.485  | P | 273.375  | P | 689.622  | -2.225 | LOC_Os03g02514.1 |
| DG <sub>o</sub> | Os001211_01 | S3 | 1.251  | -1.111 | P | 119.249  | P | 283.867  | P | 612.966  | -2.362 | LOC_Os04g42290.1 |
| DG <sub>o</sub> | Os001529_01 | S3 | 1.883  | 0.000  | P | 1262.598 | P | 4656.967 | P | 5482.930 | -2.119 | LOC_Os01g60830.1 |
| DG <sub>o</sub> | Os001539_01 | S3 | 0.000  | -1.282 | P | 125.967  | P | 202.675  | P | 492.868  | -1.968 | LOC_Os03g17410.1 |
| DG <sub>o</sub> | Os001580_01 | S3 | 0.000  | -1.876 | P | 143.931  | P | 151.632  | P | 556.419  | -1.951 | LOC_Os03g43800.2 |
| DG <sub>o</sub> | Os001582_01 | S3 | 0.000  | 2.047  | P | 435.215  | P | 489.446  | P | 118.453  | 1.877  | -                |
| DG <sub>o</sub> | Os001631_01 | S3 | 0.000  | -1.084 | P | 148.926  | P | 252.783  | P | 535.765  | -1.847 | LOC_Os03g16700.3 |
| DG <sub>o</sub> | Os001855_01 | S3 | -1.449 | 0.000  | P | 606.961  | P | 222.301  | P | 103.366  | 2.554  | LOC_Os09g35020.1 |

|                 |             |    |        |        |   |           |   |           |   |           |        |                  |
|-----------------|-------------|----|--------|--------|---|-----------|---|-----------|---|-----------|--------|------------------|
| DG <sub>o</sub> | Os001862_01 | S3 | 1.216  | -1.099 | P | 143.718   | P | 333.850   | P | 715.108   | -2.315 | LOC_Os01g66320.1 |
| DG <sub>o</sub> | Os001930_01 | S3 | 0.000  | 1.663  | P | 2243.701  | P | 1725.806  | P | 544.889   | 2.042  | LOC_Os06g49640.1 |
| DG <sub>o</sub> | Os002092_01 | S3 | 1.318  | 0.000  | P | 491.262   | P | 1224.571  | P | 1605.279  | -1.708 | LOC_Os02g04510.1 |
| DG <sub>o</sub> | Os002678_01 | S3 | -1.305 | 0.000  | P | 5788.930  | P | 2343.092  | P | 981.952   | 2.560  | LOC_Os05g03920.1 |
| DG <sub>o</sub> | Os003800_01 | S3 | 0.000  | -1.319 | P | 95.446    | P | 156.325   | P | 389.888   | -2.030 | LOC_Os02g08490.1 |
| DG <sub>o</sub> | Os007263_01 | S3 | 2.074  | 0.000  | P | 1921.936  | P | 8091.525  | P | 11500.748 | -2.581 | LOC_Os12g33150.1 |
| DG <sub>o</sub> | Os007671_01 | S3 | 1.610  | 0.000  | P | 191.985   | P | 586.187   | P | 783.429   | -2.029 | LOC_Os07g28040.1 |
| DG <sub>o</sub> | Os008153_02 | S3 | 1.406  | 0.000  | P | 331.298   | P | 878.011   | P | 1232.415  | -1.895 | -                |
| DG <sub>o</sub> | Os008486_01 | S3 | 1.259  | 0.000  | P | 199.564   | P | 477.536   | P | 643.411   | -1.689 | LOC_Os02g40730.1 |
| DG <sub>o</sub> | Os008529_01 | S3 | 1.320  | 0.000  | P | 267.444   | P | 667.909   | P | 854.903   | -1.677 | LOC_Os07g02210.2 |
| DG <sub>o</sub> | Os008538_01 | S3 | 0.000  | -1.208 | P | 518.177   | P | 1034.895  | P | 2390.001  | -2.205 | LOC_Os03g18070.1 |
| DG <sub>o</sub> | Os008556_01 | S3 | 1.531  | 0.000  | P | 2182.051  | P | 6303.891  | P | 11475.546 | -2.395 | LOC_Os02g44630.2 |
| DG <sub>o</sub> | Os008559_01 | S3 | -1.023 | 0.000  | P | 860.040   | P | 423.363   | P | 190.569   | 2.174  | LOC_Os05g51640.1 |
| DG <sub>o</sub> | Os008602_01 | S3 | 1.296  | 0.000  | P | 495.134   | P | 1215.885  | P | 1594.391  | -1.687 | LOC_Os05g06920.1 |
| DG <sub>o</sub> | Os008668_01 | S3 | 1.679  | 0.000  | P | 276.103   | P | 883.930   | P | 1503.699  | -2.445 | LOC_Os11g04720.2 |
| DG <sub>o</sub> | Os008721_01 | S3 | 0.000  | -1.047 | P | 114.253   | P | 244.218   | P | 504.780   | -2.143 | LOC_Os03g17740.1 |
| DG <sub>o</sub> | Os008740_01 | S3 | 1.714  | -1.567 | P | 876.399   | P | 2874.378  | P | 8516.821  | -3.281 | LOC_Os04g45490.1 |
| DG <sub>o</sub> | Os008745_01 | S3 | 1.454  | 0.000  | P | 311.632   | P | 853.922   | P | 1341.970  | -2.106 | LOC_Os06g05880.1 |
| DG <sub>o</sub> | Os008783_01 | S3 | -0.919 | 0.000  | P | 579.672   | P | 306.647   | P | 138.636   | 2.064  | LOC_Os01g16890.1 |
| DG <sub>o</sub> | Os008787_01 | S3 | 0.000  | -1.140 | P | 234.654   | P | 369.045   | P | 813.154   | -1.793 | LOC_Os02g47560.1 |
| DG <sub>o</sub> | Os008886_01 | S3 | 1.317  | 0.000  | P | 371.366   | P | 924.971   | P | 1449.113  | -1.964 | LOC_Os11g10990.1 |
| DG <sub>o</sub> | Os008899_01 | S3 | 1.539  | 0.000  | P | 110.724   | P | 321.785   | P | 443.902   | -2.003 | LOC_Os08g39870.1 |
| DG <sub>o</sub> | Os008905_01 | S3 | 0.000  | -1.065 | P | 210.297   | P | 398.361   | P | 833.279   | -1.986 | LOC_Os06g37000.2 |
| DG <sub>o</sub> | Os008928_01 | S3 | 1.117  | 0.000  | P | 116.341   | P | 252.414   | P | 376.320   | -1.694 | LOC_Os03g59710.1 |
| DG <sub>o</sub> | Os009107_01 | S3 | 0.000  | 2.045  | P | 898.289   | P | 700.761   | P | 169.847   | 2.403  | LOC_Os02g50130.1 |
| DG <sub>o</sub> | Os009124_01 | S3 | 1.663  | 0.000  | P | 12769.665 | P | 40428.659 | P | 40618.441 | -1.669 | LOC_Os12g02310.1 |
| DG <sub>o</sub> | Os009192_01 | S3 | 1.178  | 0.000  | P | 117.740   | P | 266.404   | P | 404.831   | -1.782 | LOC_Os01g50460.1 |
| DG <sub>o</sub> | Os009286_01 | S3 | -1.283 | 0.000  | P | 785.284   | P | 322.763   | P | 218.206   | 1.848  | LOC_Os02g34860.1 |
| DG <sub>o</sub> | Os009346_01 | S3 | 1.161  | 0.000  | P | 845.301   | P | 1890.638  | P | 2884.290  | -1.771 | LOC_Os03g52660.1 |
| DG <sub>o</sub> | Os009446_01 | S3 | 1.100  | 0.000  | P | 116.838   | P | 250.512   | P | 398.272   | -1.769 | LOC_Os04g47420.1 |
| DG <sub>o</sub> | Os009556_01 | S3 | 1.524  | -0.980 | P | 1012.907  | P | 2911.985  | P | 5743.558  | -2.503 | LOC_Os03g59320.1 |

|                 |             |    |        |        |   |          |   |           |   |           |        |                  |
|-----------------|-------------|----|--------|--------|---|----------|---|-----------|---|-----------|--------|------------------|
| DG <sub>o</sub> | Os009586_01 | S3 | 1.556  | 0.000  | P | 235.626  | P | 693.017   | P | 1013.250  | -2.104 | LOC_Os03g14040.3 |
| DG <sub>o</sub> | Os009592_01 | S3 | 0.000  | -1.166 | P | 324.889  | P | 650.648   | P | 1459.573  | -2.168 | LOC_Os05g40180.1 |
| DG <sub>o</sub> | Os009664_01 | S3 | 0.000  | -1.299 | P | 123.543  | P | 198.909   | P | 489.270   | -1.986 | LOC_Os03g04470.1 |
| DG <sub>o</sub> | Os009705_01 | S3 | 1.139  | 0.000  | P | 136.753  | P | 301.090   | P | 461.139   | -1.754 | LOC_Os03g05280.1 |
| DG <sub>o</sub> | Os009774_01 | S3 | 1.613  | 0.000  | P | 99.093   | P | 303.166   | P | 479.340   | -2.274 | LOC_Os04g45090.1 |
| DG <sub>o</sub> | Os009787_01 | S3 | 2.365  | 0.000  | P | 316.726  | P | 1631.886  | P | 1318.209  | -2.057 | LOC_Os07g23120.1 |
| DG <sub>o</sub> | Os009844_01 | S3 | 1.622  | 0.000  | P | 2201.903 | P | 6778.498  | P | 12351.941 | -2.488 | LOC_Os12g08730.1 |
| DG <sub>o</sub> | Os009847_01 | S3 | 0.000  | -1.263 | P | 393.898  | P | 571.332   | P | 1371.472  | -1.800 | LOC_Os09g02710.1 |
| DG <sub>o</sub> | Os009921_01 | S3 | 1.422  | -1.047 | P | 286.344  | P | 767.180   | P | 1585.465  | -2.469 | LOC_Os02g50620.1 |
| DG <sub>o</sub> | Os010034_01 | S3 | 1.655  | 0.000  | P | 470.580  | P | 1482.045  | P | 2367.358  | -2.331 | LOC_Os01g68940.1 |
| DG <sub>o</sub> | Os010115_01 | S3 | -1.449 | 0.000  | P | 3652.464 | P | 1338.114  | P | 760.652   | 2.264  | LOC_Os09g36040.1 |
| DG <sub>o</sub> | Os010136_01 | S3 | -1.215 | 1.485  | P | 1484.563 | P | 639.575   | P | 228.472   | 2.700  | LOC_Os11g06730.1 |
| DG <sub>o</sub> | Os010210_01 | S3 | -0.970 | 0.000  | P | 775.385  | P | 395.900   | P | 211.521   | 1.874  | LOC_Os07g42730.1 |
| DG <sub>o</sub> | Os010372_01 | S3 | 1.590  | -1.779 | P | 4620.299 | P | 13911.576 | P | 47758.151 | -3.370 | LOC_Os01g14410.1 |
| DG <sub>o</sub> | Os010407_01 | S3 | 1.512  | 0.000  | P | 156.368  | P | 445.983   | P | 560.729   | -1.842 | LOC_Os08g08120.3 |
| DG <sub>o</sub> | Os010501_01 | S3 | 2.345  | 0.000  | P | 248.125  | P | 1260.477  | P | 1985.196  | -3.000 | LOC_Os09g26670.1 |
| DG <sub>o</sub> | Os010652_01 | S3 | 0.000  | -0.973 | P | 246.415  | P | 453.077   | P | 889.216   | -1.851 | -                |
| DG <sub>o</sub> | Os010677_01 | S3 | 1.185  | -1.445 | P | 129.616  | P | 294.777   | P | 802.404   | -2.630 | -                |
| DG <sub>o</sub> | Os010869_01 | S3 | 0.000  | 1.998  | P | 561.526  | P | 573.926   | P | 143.645   | 1.967  | LOC_Os07g43020.1 |
| DG <sub>o</sub> | Os010948_01 | S3 | -1.795 | 1.377  | P | 2078.101 | P | 598.943   | P | 230.667   | 3.171  | LOC_Os03g03724.2 |
| DG <sub>o</sub> | Os011450_01 | S3 | 1.510  | 0.000  | P | 302.476  | P | 861.530   | P | 1324.413  | -2.130 | LOC_Os01g72160.1 |
| DG <sub>o</sub> | Os011561_01 | S3 | -0.947 | 2.610  | P | 1187.919 | P | 616.302   | P | 100.971   | 3.556  | LOC_Os09g10340.1 |
| DG <sub>o</sub> | Os011626_01 | S3 | -1.069 | 1.668  | P | 1307.327 | P | 622.941   | P | 196.068   | 2.737  | LOC_Os02g15900.1 |
| DG <sub>o</sub> | Os011643_01 | S3 | 0.000  | 2.112  | P | 803.511  | P | 949.385   | P | 219.585   | 1.872  | LOC_Os06g14420.1 |
| DG <sub>o</sub> | Os011662_01 | S3 | -1.534 | 0.000  | P | 3530.075 | P | 1219.200  | P | 693.537   | 2.348  | LOC_Os07g34570.2 |
| DG <sub>o</sub> | Os011667_01 | S3 | 1.264  | 0.000  | P | 105.475  | P | 253.322   | P | 372.629   | -1.821 | LOC_Os01g60430.1 |
| DG <sub>o</sub> | Os011722_01 | S3 | 0.000  | 1.876  | P | 611.944  | P | 545.023   | P | 148.508   | 2.043  | LOC_Os03g03390.1 |
| DG <sub>o</sub> | Os011839_01 | S3 | 0.000  | 2.441  | P | 1530.957 | P | 926.364   | P | 170.547   | 3.166  | LOC_Os01g02060.2 |
| DG <sub>o</sub> | Os012023_01 | S3 | 0.000  | 1.627  | P | 790.616  | P | 568.146   | P | 183.911   | 2.104  | LOC_Os02g14770.3 |
| DG <sub>o</sub> | Os012391_01 | S3 | -0.958 | 0.000  | P | 410.875  | P | 211.555   | P | 104.603   | 1.974  | LOC_Os09g39420.1 |
| DG <sub>o</sub> | Os012417_01 | S3 | 2.233  | 0.000  | P | 226.790  | P | 1065.958  | P | 1044.234  | -2.203 | LOC_Os04g47360.1 |

|                 |             |    |        |        |   |           |   |           |   |           |        |                  |
|-----------------|-------------|----|--------|--------|---|-----------|---|-----------|---|-----------|--------|------------------|
| DG <sub>0</sub> | Os012586_01 | S3 | 0.000  | -1.478 | P | 251.717   | P | 296.439   | P | 825.509   | -1.713 | LOC_Os08g15444.1 |
| DG <sub>0</sub> | Os012782_01 | S3 | 0.000  | 1.660  | P | 615.159   | P | 424.330   | P | 134.239   | 2.196  | LOC_Os05g49200.2 |
| DG <sub>0</sub> | Os012955_01 | S3 | 0.000  | 1.366  | P | 931.478   | P | 569.538   | P | 220.954   | 2.076  | LOC_Os12g14440.1 |
| DG <sub>0</sub> | Os013058_01 | S3 | -1.008 | 2.387  | P | 1286.175  | P | 639.444   | P | 122.234   | 3.395  | LOC_Os04g05010.1 |
| DG <sub>0</sub> | Os013109_01 | S3 | 0.000  | 1.909  | P | 796.481   | P | 663.225   | P | 176.657   | 2.173  | LOC_Os02g20310.3 |
| DG <sub>0</sub> | Os013174_01 | S3 | 0.000  | 1.847  | P | 530.343   | P | 445.485   | P | 123.822   | 2.099  | LOC_Os09g10930.3 |
| DG <sub>0</sub> | Os013589_01 | S3 | 0.000  | 1.425  | P | 811.601   | P | 479.258   | P | 178.538   | 2.185  | LOC_Os08g09270.1 |
| DG <sub>0</sub> | Os013945_01 | S3 | -1.244 | 0.000  | P | 1555.689  | P | 656.986   | P | 402.751   | 1.950  | LOC_Os03g38950.1 |
| DG <sub>0</sub> | Os013976_01 | S3 | -1.240 | 0.000  | P | 10004.501 | P | 4236.423  | P | 2669.855  | 1.906  | LOC_Os10g35370.2 |
| DG <sub>0</sub> | Os014307_01 | S3 | 0.000  | 1.575  | P | 665.989   | P | 530.521   | P | 178.041   | 1.903  | LOC_Os07g32630.1 |
| DG <sub>0</sub> | Os014662_01 | S3 | 0.000  | 1.940  | P | 382.515   | P | 395.226   | P | 102.985   | 1.893  | LOC_Os03g17580.1 |
| DG <sub>0</sub> | Os014758_01 | S3 | 0.000  | 1.417  | P | 879.076   | P | 545.018   | P | 204.167   | 2.106  | LOC_Os01g13120.1 |
| DG <sub>0</sub> | Os014891_01 | S3 | 0.000  | 1.607  | P | 766.957   | P | 588.228   | P | 193.110   | 1.990  | LOC_Os03g01190.1 |
| DG <sub>0</sub> | Os015046_01 | S3 | 1.170  | 0.000  | P | 627.711   | P | 1412.221  | P | 2104.391  | -1.745 | LOC_Os03g29190.2 |
| DG <sub>0</sub> | Os015137_01 | S3 | 1.287  | 0.000  | P | 503.470   | P | 1228.323  | P | 1674.580  | -1.734 | LOC_Os03g62410.1 |
| DG <sub>0</sub> | Os015144_01 | S3 | 1.307  | 0.000  | P | 1489.034  | P | 3683.334  | P | 5588.194  | -1.908 | LOC_Os03g26650.2 |
| DG <sub>0</sub> | Os015150_01 | S3 | 0.000  | 2.631  | P | 4264.757  | P | 3832.398  | P | 618.723   | 2.785  | LOC_Os06g41010.4 |
| DG <sub>0</sub> | Os015391_01 | S3 | 0.000  | 1.645  | P | 679.528   | P | 489.141   | P | 156.437   | 2.119  | LOC_Os09g07900.1 |
| DG <sub>0</sub> | Os015579_01 | S3 | 0.000  | 1.735  | P | 684.500   | P | 390.179   | P | 117.201   | 2.546  | LOC_Os10g21000.1 |
| DG <sub>0</sub> | Os015593_01 | S3 | -1.199 | 1.545  | P | 1205.289  | P | 525.160   | P | 179.917   | 2.744  | LOC_Os08g26870.3 |
| DG <sub>0</sub> | Os015605_01 | S3 | 1.825  | 0.000  | P | 1241.729  | P | 4399.699  | P | 6279.142  | -2.338 | LOC_Os03g05620.1 |
| DG <sub>0</sub> | Os015656_01 | S3 | 0.000  | 1.338  | P | 504.613   | P | 343.728   | P | 135.923   | 1.892  | LOC_Os07g41280.3 |
| DG <sub>0</sub> | Os015682_01 | S3 | 1.298  | 0.000  | P | 7398.723  | P | 18187.326 | P | 24502.503 | -1.728 | LOC_Os01g18744.1 |
| DG <sub>0</sub> | Os015744_01 | S3 | -0.918 | 2.369  | P | 2994.249  | P | 1584.699  | P | 306.745   | 3.287  | LOC_Os04g54790.1 |
| DG <sub>0</sub> | Os015839_01 | S3 | 0.000  | 1.745  | P | 1320.408  | P | 1184.921  | P | 353.454   | 1.901  | LOC_Os02g35180.1 |
| DG <sub>0</sub> | Os015940_01 | S3 | 1.105  | -0.973 | P | 180.965   | P | 389.384   | P | 764.116   | -2.078 | LOC_Os07g28920.1 |
| DG <sub>0</sub> | Os016026_01 | S3 | 1.465  | 0.000  | P | 216.200   | P | 597.013   | P | 815.086   | -1.915 | LOC_Os08g39970.1 |
| DG <sub>0</sub> | Os016168_01 | S3 | 1.480  | 0.000  | P | 1598.914  | P | 4459.389  | P | 6138.704  | -1.941 | LOC_Os02g39930.1 |
| DG <sub>0</sub> | Os016235_01 | S3 | 0.000  | 1.427  | P | 578.407   | P | 429.578   | P | 159.759   | 1.856  | LOC_Os02g58150.2 |
| DG <sub>0</sub> | Os016284_01 | S3 | 0.000  | 1.557  | P | 2114.060  | P | 1427.512  | P | 485.115   | 2.124  | LOC_Os05g34650.1 |
| DG <sub>0</sub> | Os016404_01 | S3 | 1.771  | -1.188 | P | 239.295   | P | 816.489   | P | 1859.832  | -2.958 | LOC_Os01g15610.1 |

|                 |             |    |        |        |   |          |   |          |   |          |        |                  |
|-----------------|-------------|----|--------|--------|---|----------|---|----------|---|----------|--------|------------------|
| DG <sub>o</sub> | Os016433_01 | S3 | 1.169  | 0.000  | P | 185.591  | P | 417.320  | P | 625.995  | -1.754 | LOC_Os04g15920.1 |
| DG <sub>o</sub> | Os016499_01 | S3 | 1.336  | 0.000  | P | 617.961  | P | 1559.524 | P | 2184.479 | -1.822 | LOC_Os09g11370.1 |
| DG <sub>o</sub> | Os016512_01 | S3 | 0.000  | 1.458  | P | 503.051  | P | 300.840  | P | 109.471  | 2.200  | LOC_Os03g29760.2 |
| DG <sub>o</sub> | Os016558_01 | S3 | 0.000  | 1.966  | P | 420.125  | P | 426.642  | P | 109.229  | 1.943  | LOC_Os03g57500.1 |
| DG <sub>o</sub> | Os016594_01 | S3 | 1.592  | 0.000  | P | 1968.038 | P | 5934.825 | P | 7875.318 | -2.001 | LOC_Os07g49100.1 |
| DG <sub>o</sub> | Os016612_01 | S3 | 0.000  | 1.684  | P | 761.655  | P | 614.324  | P | 191.193  | 1.994  | LOC_Os07g09150.1 |
| DG <sub>o</sub> | Os016770_01 | S3 | 0.000  | 2.118  | P | 1071.040 | P | 1133.782 | P | 261.170  | 2.036  | LOC_Os07g30760.2 |
| DG <sub>o</sub> | Os016868_01 | S3 | 0.000  | 1.366  | P | 646.897  | P | 348.581  | P | 135.272  | 2.258  | LOC_Os01g51980.1 |
| DG <sub>o</sub> | Os016869_01 | S3 | -1.184 | 0.000  | P | 4642.844 | P | 2042.861 | P | 1122.591 | 2.048  | LOC_Os01g08700.6 |
| DG <sub>o</sub> | Os016966_01 | S3 | 0.000  | 1.648  | P | 3042.902 | P | 1676.147 | P | 534.872  | 2.508  | LOC_Os04g32850.2 |
| DG <sub>o</sub> | Os017110_01 | S3 | 0.000  | -1.233 | P | 379.021  | P | 531.358  | P | 1248.892 | -1.720 | LOC_Os05g39000.1 |
| DG <sub>o</sub> | Os017295_01 | S3 | 0.000  | 1.525  | P | 1160.487 | P | 751.638  | P | 261.118  | 2.152  | LOC_Os03g17010.1 |
| DG <sub>o</sub> | Os017305_01 | S3 | 0.000  | -1.129 | P | 192.276  | P | 375.727  | P | 822.015  | -2.096 | -                |
| DG <sub>o</sub> | Os017421_01 | S3 | 0.000  | 1.670  | P | 1785.341 | P | 1093.144 | P | 343.445  | 2.378  | LOC_Os02g44590.1 |
| DG <sub>o</sub> | Os017533_01 | S3 | 1.510  | 0.000  | P | 379.617  | P | 1080.884 | P | 1311.390 | -1.788 | -                |
| DG <sub>o</sub> | Os017639_01 | S3 | 0.000  | 1.571  | P | 1282.459 | P | 945.650  | P | 318.327  | 2.010  | LOC_Os02g28980.1 |
| DG <sub>o</sub> | Os017662_01 | S3 | 0.000  | 1.594  | P | 913.520  | P | 546.760  | P | 181.127  | 2.334  | LOC_Os12g24080.1 |
| DG <sub>o</sub> | Os017667_01 | S3 | 0.000  | 1.620  | P | 890.538  | P | 602.420  | P | 196.034  | 2.184  | LOC_Os06g15360.1 |
| DG <sub>o</sub> | Os017780_01 | S3 | 0.000  | 1.415  | P | 666.004  | P | 481.707  | P | 180.639  | 1.882  | LOC_Os05g51180.1 |
| DG <sub>o</sub> | Os017967_01 | S3 | 1.406  | 0.000  | P | 768.206  | P | 2036.413 | P | 3388.500 | -2.141 | LOC_Os05g49880.1 |
| DG <sub>o</sub> | Os018037_01 | S3 | 0.000  | 1.913  | P | 1247.442 | P | 787.481  | P | 209.083  | 2.577  | LOC_Os02g43790.1 |
| DG <sub>o</sub> | Os018049_01 | S3 | 2.057  | 0.000  | P | 485.646  | P | 2021.257 | P | 2915.641 | -2.586 | LOC_Os03g49630.1 |
| DG <sub>o</sub> | Os018086_01 | S3 | 0.000  | 1.609  | P | 1178.070 | P | 761.049  | P | 249.483  | 2.239  | -                |
| DG <sub>o</sub> | Os018264_01 | S3 | 0.000  | -1.004 | P | 500.355  | P | 929.792  | P | 1865.059 | -1.898 | LOC_Os08g41320.1 |
| DG <sub>o</sub> | Os018279_01 | S3 | 1.455  | 0.000  | P | 1078.117 | P | 2955.798 | P | 4392.454 | -2.027 | LOC_Os09g04790.1 |
| DG <sub>o</sub> | Os018378_01 | S3 | 2.308  | 0.000  | P | 872.336  | P | 4318.976 | P | 6248.325 | -2.841 | LOC_Os08g02210.2 |
| DG <sub>o</sub> | Os018767_01 | S3 | 0.000  | 2.154  | P | 980.788  | P | 889.183  | P | 199.806  | 2.295  | LOC_Os04g32050.1 |
| DG <sub>o</sub> | Os018818_01 | S3 | -0.969 | 1.395  | P | 2661.653 | P | 1359.475 | P | 516.769  | 2.365  | -                |
| DG <sub>o</sub> | Os018882_01 | S3 | 0.000  | 1.506  | P | 1832.048 | P | 1161.112 | P | 408.828  | 2.164  | LOC_Os03g27790.1 |
| DG <sub>o</sub> | Os018906_01 | S3 | 0.000  | 1.890  | P | 472.619  | P | 425.597  | P | 114.865  | 2.041  | LOC_Os07g31450.1 |
| DG <sub>o</sub> | Os019113_01 | S3 | -0.951 | 0.000  | P | 1470.931 | P | 760.620  | P | 400.718  | 1.876  | LOC_Os12g17910.1 |



|                 |             |    |        |        |   |          |   |          |   |          |        |                  |
|-----------------|-------------|----|--------|--------|---|----------|---|----------|---|----------|--------|------------------|
| DG <sub>o</sub> | Os020076_01 | S3 | 1.664  | 0.000  | P | 283.364  | P | 898.253  | P | 1356.637 | -2.259 | LOC_Os08g39380.1 |
| DG <sub>o</sub> | Os020331_01 | S3 | 1.813  | 0.000  | P | 598.049  | P | 2100.952 | P | 3458.889 | -2.532 | LOC_Os03g40650.1 |
| DG <sub>o</sub> | Os020390_01 | S3 | 0.000  | 1.969  | P | 1225.048 | P | 930.502  | P | 237.675  | 2.366  | LOC_Os03g58070.1 |
| DG <sub>o</sub> | Os020669_01 | S3 | 0.000  | 1.686  | P | 928.754  | P | 540.578  | P | 168.056  | 2.466  | LOC_Os03g16369.2 |
| DG <sub>o</sub> | Os021036_01 | S3 | 0.000  | 1.950  | P | 574.502  | P | 589.368  | P | 152.522  | 1.913  | LOC_Os01g23620.1 |
| DG <sub>o</sub> | Os021077_01 | S3 | 0.000  | 1.745  | P | 448.475  | P | 301.629  | P | 89.969   | 2.318  | LOC_Os07g12830.2 |
| DG <sub>o</sub> | Os021124_01 | S3 | 0.000  | 1.461  | P | 399.925  | P | 250.550  | P | 90.993   | 2.136  | LOC_Os02g57590.1 |
| DG <sub>o</sub> | Os021319_01 | S3 | -1.215 | 0.000  | P | 1221.772 | P | 526.232  | P | 335.701  | 1.864  | LOC_Os05g41010.1 |
| DG <sub>o</sub> | Os021389_01 | S3 | 0.000  | 2.196  | P | 561.153  | P | 552.882  | P | 120.696  | 2.217  | LOC_Os03g60820.1 |
| DG <sub>o</sub> | Os021453_01 | S3 | 0.000  | 1.680  | P | 1541.329 | P | 1218.015 | P | 380.012  | 2.020  | LOC_Os02g12760.1 |
| DG <sub>o</sub> | Os021454_01 | S3 | 0.000  | 2.008  | P | 1805.721 | P | 1388.511 | P | 345.223  | 2.387  | LOC_Os03g37970.1 |
| DG <sub>o</sub> | Os021485_01 | S3 | 0.000  | 1.696  | P | 414.913  | P | 299.311  | P | 92.370   | 2.167  | LOC_Os06g50818.1 |
| DG <sub>o</sub> | Os021505_01 | S3 | 0.000  | -1.033 | P | 1237.341 | P | 1989.465 | P | 4070.396 | -1.718 | LOC_Os02g51930.1 |
| DG <sub>o</sub> | Os021549_01 | S3 | 0.000  | 1.663  | P | 1206.584 | P | 904.113  | P | 285.456  | 2.080  | LOC_Os02g58560.1 |
| DG <sub>o</sub> | Os021606_01 | S3 | 1.430  | 0.000  | P | 537.466  | P | 1448.415 | P | 2091.623 | -1.960 | LOC_Os09g21470.1 |
| DG <sub>o</sub> | Os021893_01 | S3 | -1.563 | 0.000  | P | 1514.079 | P | 512.504  | P | 306.291  | 2.305  | LOC_Os09g35030.1 |
| DG <sub>o</sub> | Os022572_01 | S3 | 0.000  | -1.280 | P | 2345.467 | P | 3387.188 | P | 8225.550 | -1.810 | LOC_Os12g36980.1 |
| DG <sub>o</sub> | Os023778_01 | S3 | 0.000  | -1.198 | P | 236.787  | P | 365.389  | P | 838.562  | -1.824 | LOC_Os01g63010.1 |
| DG <sub>o</sub> | Os023977_01 | S3 | 0.000  | 1.987  | P | 403.150  | P | 410.183  | P | 103.477  | 1.962  | LOC_Os06g43790.1 |
| DG <sub>o</sub> | Os024371_01 | S3 | 1.862  | 0.000  | P | 335.220  | P | 1218.430 | P | 2025.861 | -2.595 | -                |
| DG <sub>o</sub> | Os024723_01 | S3 | 0.000  | 1.434  | P | 843.648  | P | 597.597  | P | 221.173  | 1.931  | LOC_Os11g05490.1 |
| DG <sub>o</sub> | Os024766_01 | S3 | 0.000  | 1.865  | P | 1010.402 | P | 886.520  | P | 243.422  | 2.053  | LOC_Os03g64360.1 |
| DG <sub>o</sub> | Os024793_01 | S3 | 0.000  | 1.372  | P | 407.593  | P | 292.204  | P | 112.879  | 1.852  | LOC_Os01g63190.1 |
| DG <sub>o</sub> | Os025187_01 | S3 | 1.161  | 0.000  | P | 218.397  | P | 488.437  | P | 757.439  | -1.794 | -                |
| DG <sub>o</sub> | Os025398_01 | S3 | 1.131  | 0.000  | P | 588.517  | P | 1289.024 | P | 1970.133 | -1.743 | LOC_Os05g45410.1 |
| DG <sub>o</sub> | Os025816_01 | S3 | 1.815  | 0.000  | P | 164.522  | P | 578.780  | P | 850.244  | -2.370 | LOC_Os07g14610.1 |
| DG <sub>o</sub> | Os025974_01 | S3 | 0.000  | 1.691  | P | 585.697  | P | 380.722  | P | 117.936  | 2.312  | LOC_Os03g53060.1 |
| DG <sub>o</sub> | Os026390_01 | S3 | 1.264  | -1.014 | P | 153.555  | P | 368.750  | P | 744.657  | -2.278 | LOC_Os05g25040.2 |
| DG <sub>o</sub> | Os026464_01 | S3 | 1.215  | -1.136 | P | 377.385  | P | 876.366  | P | 1925.812 | -2.351 | LOC_Os09g34100.1 |
| DG <sub>o</sub> | Os027785_01 | S3 | 1.414  | 0.000  | P | 382.660  | P | 1019.871 | P | 1831.553 | -2.259 | LOC_Os03g61130.1 |
| DG <sub>o</sub> | Os027934_01 | S3 | 1.157  | 0.000  | P | 114.216  | P | 254.641  | P | 363.919  | -1.672 | LOC_Os06g06270.1 |

|                 |             |    |        |        |   |          |   |          |   |          |        |                  |
|-----------------|-------------|----|--------|--------|---|----------|---|----------|---|----------|--------|------------------|
| DG <sub>o</sub> | Os028021_01 | S3 | -0.973 | 1.466  | P | 1626.494 | P | 828.704  | P | 299.946  | 2.439  | LOC_Os01g04670.1 |
| DG <sub>o</sub> | Os028605_01 | S3 | -1.905 | 0.000  | P | 3132.828 | P | 836.598  | P | 412.530  | 2.925  | LOC_Os02g06380.1 |
| DG <sub>o</sub> | Os028616_01 | S3 | 1.366  | -0.989 | P | 193.347  | P | 498.500  | P | 989.692  | -2.356 | LOC_Os11g02440.2 |
| DG <sub>o</sub> | Os028837_01 | S3 | -1.212 | 0.000  | P | 884.747  | P | 381.970  | P | 235.509  | 1.909  | LOC_Os12g04970.1 |
| DG <sub>o</sub> | Os029489_01 | S3 | 0.000  | -1.063 | P | 103.909  | P | 207.058  | P | 432.540  | -2.058 | LOC_Os02g57854.1 |
| DG <sub>o</sub> | Os029934_01 | S3 | 1.518  | 0.000  | P | 168.647  | P | 482.918  | P | 540.086  | -1.679 | LOC_Os09g13410.1 |
| DG <sub>o</sub> | Os030028_01 | S3 | 1.413  | 0.000  | P | 138.116  | P | 367.766  | P | 492.589  | -1.835 | LOC_Os01g02710.1 |
| DG <sub>o</sub> | Os030108_01 | S3 | 1.319  | 0.000  | P | 509.388  | P | 1270.605 | P | 1708.554 | -1.746 | LOC_Os06g37400.1 |
| DG <sub>o</sub> | Os030344_01 | S3 | 1.786  | 0.000  | P | 163.078  | P | 562.420  | P | 674.268  | -2.048 | LOC_Os12g43820.1 |
| DG <sub>o</sub> | Os030649_01 | S3 | 0.000  | 1.494  | P | 479.963  | P | 272.419  | P | 96.743   | 2.311  | -                |
| DG <sub>o</sub> | Os031701_01 | S3 | 0.000  | 1.337  | P | 935.865  | P | 532.163  | P | 210.715  | 2.151  | LOC_Os01g24690.1 |
| DG <sub>o</sub> | Os032953_01 | S3 | 1.267  | 0.000  | P | 149.319  | P | 359.417  | P | 503.842  | -1.755 | LOC_Os01g35310.1 |
| DG <sub>o</sub> | Os033589_01 | S3 | 0.000  | 1.505  | P | 684.841  | P | 394.428  | P | 138.941  | 2.301  | LOC_Os08g25240.1 |
| DG <sub>o</sub> | Os034470_01 | S3 | 1.461  | 0.000  | P | 107.661  | P | 296.301  | P | 508.256  | -2.239 | LOC_Os10g10420.1 |
| DG <sub>o</sub> | Os034680_01 | S3 | 0.000  | 1.759  | P | 378.277  | P | 290.554  | P | 85.848   | 2.140  | LOC_Os05g04914.1 |
| DG <sub>o</sub> | Os035048_01 | S3 | 1.261  | 0.000  | P | 119.794  | P | 287.072  | P | 371.367  | -1.632 | LOC_Os12g39220.1 |
| DG <sub>o</sub> | Os035785_01 | S3 | 0.000  | 1.371  | P | 499.492  | P | 351.937  | P | 136.103  | 1.876  | LOC_Os09g30050.1 |
| DG <sub>o</sub> | Os036777_01 | S3 | 0.000  | 2.419  | P | 887.543  | P | 582.230  | P | 108.870  | 3.027  | LOC_Os02g48920.1 |
| DG <sub>o</sub> | Os037607_01 | S3 | -1.042 | 0.000  | P | 541.553  | P | 263.061  | P | 135.621  | 1.998  | LOC_Os01g02680.1 |
| DG <sub>o</sub> | Os038942_01 | S3 | 0.000  | -1.735 | P | 198.955  | P | 204.434  | P | 680.478  | -1.774 | LOC_Os08g37670.1 |
| DG <sub>o</sub> | Os039107_01 | S3 | 1.354  | 0.000  | P | 126.554  | P | 323.410  | P | 409.390  | -1.694 | LOC_Os04g56800.1 |
| DG <sub>o</sub> | Os039593_01 | S3 | -1.002 | 1.851  | P | 1350.998 | P | 674.643  | P | 186.954  | 2.853  | -                |
| DG <sub>o</sub> | Os039978_01 | S3 | -1.229 | 0.000  | P | 406.686  | P | 173.479  | P | 97.846   | 2.055  | -                |
| DG <sub>o</sub> | Os040526_01 | S3 | 1.167  | 0.000  | P | 141.729  | P | 318.282  | P | 502.493  | -1.826 | LOC_Os01g62680.1 |
| DG <sub>o</sub> | Os041048_01 | S3 | -1.039 | 0.000  | P | 535.838  | P | 260.735  | P | 148.334  | 1.853  | -                |
| DG <sub>o</sub> | Os041150_01 | S3 | 1.510  | 0.000  | P | 221.410  | P | 630.476  | P | 771.738  | -1.801 | LOC_Os06g43850.1 |
| DG <sub>o</sub> | Os041241_01 | S3 | 1.644  | 0.000  | P | 161.040  | P | 503.136  | P | 677.112  | -2.072 | LOC_Os01g21270.1 |
| DG <sub>o</sub> | Os042441_01 | S3 | 0.000  | -1.214 | P | 357.153  | P | 763.471  | P | 1771.293 | -2.310 | LOC_Os06g13800.1 |
| DG <sub>o</sub> | Os042994_01 | S3 | 0.000  | -0.980 | P | 148.019  | P | 254.347  | P | 501.683  | -1.761 | LOC_Os05g31090.1 |
| DG <sub>o</sub> | Os043803_01 | S3 | 0.000  | 2.353  | P | 535.878  | P | 603.540  | P | 118.157  | 2.181  | LOC_Os04g20280.1 |
| DG <sub>o</sub> | Os044196_01 | S3 | 0.000  | 1.448  | P | 1003.780 | P | 737.735  | P | 270.400  | 1.892  | LOC_Os05g32650.1 |

|                 |             |    |        |        |   |           |   |           |   |           |        |                  |
|-----------------|-------------|----|--------|--------|---|-----------|---|-----------|---|-----------|--------|------------------|
| DG <sub>o</sub> | Os044300_01 | S3 | 0.000  | 3.060  | P | 21361.559 | P | 21318.182 | P | 2556.570  | 3.063  | LOC_Os05g11320.1 |
| DG <sub>o</sub> | Os044585_01 | S3 | 0.000  | 2.160  | P | 374.925   | P | 434.205   | P | 97.123    | 1.949  | LOC_Os05g14360.1 |
| DG <sub>o</sub> | Os044729_01 | S3 | 1.683  | 0.000  | P | 105.878   | P | 339.877   | P | 404.700   | -1.934 | LOC_Os05g30200.1 |
| DG <sub>o</sub> | Os044800_01 | S3 | 0.000  | 2.277  | P | 616.772   | P | 548.592   | P | 113.221   | 2.446  | LOC_Os08g31228.1 |
| DG <sub>o</sub> | Os044943_01 | S3 | 0.000  | -1.156 | P | 214.045   | P | 416.394   | P | 928.002   | -2.116 | LOC_Os07g47750.1 |
| DG <sub>o</sub> | Os045005_01 | S3 | 1.484  | 0.000  | P | 746.814   | P | 2089.172  | P | 2828.470  | -1.921 | -                |
| DG <sub>o</sub> | Os045055_01 | S3 | 1.452  | 0.000  | P | 271.916   | P | 743.777   | P | 999.942   | -1.879 | -                |
| DG <sub>o</sub> | Os045207_01 | S3 | 1.761  | 0.000  | P | 348.701   | P | 1181.493  | P | 2036.576  | -2.546 | -                |
| DG <sub>o</sub> | Os045261_01 | S3 | 1.136  | 0.000  | P | 208.139   | P | 457.571   | P | 769.017   | -1.885 | LOC_Os02g34610.1 |
| DG <sub>o</sub> | Os045535_01 | S3 | 1.107  | 0.000  | P | 273.493   | P | 589.217   | P | 900.619   | -1.719 | -                |
| DG <sub>o</sub> | Os045577_01 | S3 | 1.644  | 0.000  | P | 520.462   | P | 1626.740  | P | 2812.283  | -2.434 | LOC_Os12g07990.1 |
| DG <sub>o</sub> | Os045664_01 | S3 | 1.888  | 0.000  | P | 345.258   | P | 1278.217  | P | 2417.400  | -2.808 | LOC_Os02g25890.1 |
| DG <sub>o</sub> | Os046095_01 | S3 | 1.765  | 0.000  | P | 191.789   | P | 652.034   | P | 1053.077  | -2.457 | LOC_Os08g22700.1 |
| DG <sub>o</sub> | Os046251_01 | S3 | 1.156  | 0.000  | P | 186.759   | P | 416.042   | P | 713.963   | -1.935 | LOC_Os11g16850.1 |
| DG <sub>o</sub> | Os046281_01 | S3 | 1.104  | -1.288 | P | 316.742   | P | 680.816   | P | 1662.829  | -2.392 | LOC_Os10g38640.1 |
| DG <sub>o</sub> | Os046306_01 | S3 | 1.249  | 0.000  | P | 2347.797  | P | 5581.231  | P | 7629.437  | -1.700 | -                |
| DG <sub>o</sub> | Os046332_01 | S3 | 1.751  | 0.000  | P | 11830.492 | P | 39819.773 | P | 55230.288 | -2.223 | LOC_Os11g19180.1 |
| DG <sub>o</sub> | Os046570_01 | S3 | 1.155  | 0.000  | P | 341.441   | P | 760.352   | P | 1154.727  | -1.758 | LOC_Os09g06330.1 |
| DG <sub>o</sub> | Os046599_01 | S3 | 1.420  | 0.000  | P | 1509.743  | P | 4038.797  | P | 6458.481  | -2.097 | LOC_Os07g33280.1 |
| DG <sub>o</sub> | Os046857_01 | S3 | 1.538  | 0.000  | P | 372.856   | P | 1082.381  | P | 1813.419  | -2.282 | LOC_Os02g38330.1 |
| DG <sub>o</sub> | Os047260_01 | S3 | -1.024 | 0.000  | P | 6876.416  | P | 3381.847  | P | 1820.659  | 1.917  | LOC_Os06g34840.1 |
| DG <sub>o</sub> | Os047500_01 | S3 | -1.306 | 2.742  | P | 5103.033  | P | 2064.422  | P | 308.657   | 4.047  | LOC_Os06g43740.1 |
| DG <sub>o</sub> | Os047852_01 | S3 | 1.552  | 0.000  | P | 194.851   | P | 571.278   | P | 1053.995  | -2.435 | LOC_Os10g24050.1 |
| DG <sub>o</sub> | Os048190_01 | S3 | 1.116  | 0.000  | P | 161.862   | P | 350.839   | P | 610.262   | -1.915 | LOC_Os07g27970.1 |
| DG <sub>o</sub> | Os048236_01 | S3 | 1.200  | 0.000  | P | 264.475   | P | 607.484   | P | 904.336   | -1.774 | LOC_Os05g34740.1 |
| DG <sub>o</sub> | Os048756_01 | S3 | -1.021 | 1.540  | P | 618.952   | P | 304.899   | P | 104.835   | 2.562  | LOC_Os06g23780.1 |
| DG <sub>o</sub> | Os048781_01 | S3 | 0.000  | 2.740  | P | 2210.579  | P | 1643.526  | P | 246.009   | 3.168  | -                |
| DG <sub>o</sub> | Os048837_01 | S3 | 0.000  | 1.796  | P | 805.100   | P | 439.710   | P | 126.600   | 2.669  | LOC_Os10g06810.1 |
| DG <sub>o</sub> | Os049669_01 | S3 | 0.000  | -1.178 | P | 247.859   | P | 340.277   | P | 769.892   | -1.635 | -                |
| DG <sub>o</sub> | Os050257_01 | S3 | 1.320  | 0.000  | P | 426.031   | P | 1063.722  | P | 1517.968  | -1.833 | LOC_Os06g34800.1 |
| DG <sub>o</sub> | Os050517_01 | S3 | 0.000  | 1.852  | P | 887.872   | P | 761.814   | P | 211.031   | 2.073  | LOC_Os12g26490.1 |

|                 |             |    |        |        |   |           |   |           |   |           |        |                  |
|-----------------|-------------|----|--------|--------|---|-----------|---|-----------|---|-----------|--------|------------------|
| DG <sub>o</sub> | Os051177_01 | S3 | 1.204  | 0.000  | P | 897.348   | P | 2067.322  | P | 2992.294  | -1.738 | -                |
| DG <sub>o</sub> | Os051326_01 | S3 | 1.100  | 0.000  | P | 193.725   | P | 415.260   | P | 643.308   | -1.731 | LOC_Os05g35910.1 |
| DG <sub>o</sub> | Os051583_01 | S3 | 0.000  | 1.307  | P | 491.374   | P | 329.958   | P | 133.331   | 1.882  | -                |
| DG <sub>o</sub> | Os051737_01 | S3 | 1.224  | 0.000  | P | 163.788   | P | 382.611   | P | 537.153   | -1.714 | LOC_Os06g26050.1 |
| DG <sub>o</sub> | Os051935_01 | S3 | 1.410  | 0.000  | P | 715.890   | P | 1902.407  | P | 2985.035  | -2.060 | LOC_Os01g15270.1 |
| DG <sub>o</sub> | Os051938_01 | S3 | 1.557  | 0.000  | P | 123.604   | P | 363.609   | P | 433.131   | -1.809 | LOC_Os10g39410.1 |
| DG <sub>o</sub> | Os052021_01 | S3 | 0.000  | 1.684  | P | 1501.036  | P | 795.574   | P | 247.656   | 2.600  | LOC_Os12g05430.1 |
| DG <sub>o</sub> | Os052067_01 | S3 | 0.000  | 1.824  | P | 1318.172  | P | 701.957   | P | 198.256   | 2.733  | -                |
| DG <sub>o</sub> | Os052085_01 | S3 | 0.000  | 1.900  | P | 21800.886 | P | 12278.960 | P | 3290.245  | 2.728  | LOC_Os07g25430.3 |
| DG <sub>o</sub> | Os052091_01 | S3 | -1.163 | 1.751  | P | 798.107   | P | 356.502   | P | 105.924   | 2.914  | LOC_Os07g08660.1 |
| DG <sub>o</sub> | Os052153_01 | S3 | 0.000  | 1.390  | P | 694.705   | P | 455.475   | P | 173.803   | 1.999  | LOC_Os03g14530.1 |
| DG <sub>o</sub> | Os052430_01 | S3 | -0.954 | 0.000  | P | 789.496   | P | 407.643   | P | 191.874   | 2.041  | LOC_Os07g29620.1 |
| DG <sub>o</sub> | Os052461_01 | S3 | 0.000  | 1.825  | P | 4357.999  | P | 3846.062  | P | 1085.347  | 2.006  | LOC_Os04g33110.1 |
| DG <sub>o</sub> | Os054432_01 | S3 | -0.928 | 0.000  | P | 9512.894  | P | 4999.304  | P | 2485.754  | 1.936  | LOC_Os04g58200.1 |
| DG <sub>o</sub> | Os054556_01 | S3 | 0.000  | -1.782 | P | 2848.823  | P | 4939.139  | P | 16991.597 | -2.576 | LOC_Os01g14410.1 |
| DG <sub>o</sub> | Os054592_01 | S3 | 0.000  | 1.629  | P | 596.577   | P | 440.116   | P | 142.320   | 2.068  | LOC_Os05g06310.1 |
| DG <sub>o</sub> | Os054602_01 | S3 | 0.000  | 1.596  | P | 475.799   | P | 338.152   | P | 111.834   | 2.089  | LOC_Os08g35190.2 |
| DG <sub>o</sub> | Os054607_01 | S3 | -0.953 | 1.659  | P | 852.613   | P | 440.412   | P | 139.493   | 2.612  | LOC_Os05g06780.1 |
| DG <sub>o</sub> | Os054638_01 | S3 | 0.000  | 1.542  | P | 743.176   | P | 466.957   | P | 160.375   | 2.212  | -                |
| DG <sub>o</sub> | Os054660_01 | S3 | 0.000  | 1.513  | P | 23099.878 | P | 14374.025 | P | 5035.711  | 2.198  | LOC_Os04g41560.2 |
| DG <sub>o</sub> | Os054673_01 | S3 | 0.000  | 2.197  | P | 2837.491  | P | 2723.583  | P | 594.112   | 2.256  | LOC_Os03g55540.1 |
| DG <sub>o</sub> | Os054977_01 | S3 | 0.000  | 1.489  | P | 891.456   | P | 599.693   | P | 213.638   | 2.061  | LOC_Os01g59970.1 |
| DG <sub>o</sub> | Os054983_01 | S3 | 0.000  | 2.253  | P | 539.885   | P | 507.171   | P | 106.414   | 2.343  | LOC_Os05g33310.1 |
| DG <sub>o</sub> | Os055024_01 | S3 | 0.000  | 1.379  | P | 2259.013  | P | 1603.749  | P | 616.490   | 1.874  | LOC_Os04g53310.1 |
| DG <sub>o</sub> | Os055030_01 | S3 | 0.000  | 2.075  | P | 371.152   | P | 350.343   | P | 83.132    | 2.159  | LOC_Os04g23180.1 |
| DG <sub>o</sub> | Os055155_01 | S3 | 0.000  | 2.827  | P | 1129.420  | P | 831.376   | P | 117.186   | 3.269  | LOC_Os12g10220.1 |
| DG <sub>o</sub> | Os055171_01 | S3 | 0.000  | 2.663  | P | 1724.488  | P | 1589.554  | P | 250.933   | 2.781  | LOC_Os06g04230.1 |
| DG <sub>o</sub> | Os055334_01 | S3 | 0.000  | 1.470  | P | 514.067   | P | 335.478   | P | 121.092   | 2.086  | LOC_Os10g37240.1 |
| DG <sub>o</sub> | Os055646_01 | S3 | -1.053 | 1.390  | P | 1693.501  | P | 816.049   | P | 311.304   | 2.444  | LOC_Os12g29670.1 |
| DG <sub>o</sub> | Os055709_01 | S3 | 1.222  | 0.000  | P | 1571.747  | P | 3667.438  | P | 5566.987  | -1.825 | LOC_Os12g41110.1 |
| DG <sub>o</sub> | Os055785_01 | S3 | 0.000  | 1.266  | P | 1057.381  | P | 637.354   | P | 264.960   | 1.997  | LOC_Os01g56220.1 |

|                 |             |    |        |        |   |           |   |           |   |           |        |                  |
|-----------------|-------------|----|--------|--------|---|-----------|---|-----------|---|-----------|--------|------------------|
| DG <sub>0</sub> | Os056703_01 | S3 | 0.000  | 1.464  | P | 744.513   | P | 431.195   | P | 156.299   | 2.252  | LOC_Os01g09150.1 |
| DG <sub>0</sub> | Os056758_01 | S3 | 0.000  | 1.716  | P | 799.965   | P | 495.066   | P | 150.727   | 2.408  | -                |
| DG <sub>0</sub> | Os056918_02 | S3 | 0.000  | 2.125  | P | 3081.512  | P | 2380.425  | P | 545.623   | 2.498  | LOC_Os01g13690.1 |
| DG <sub>0</sub> | Os056946_01 | S3 | 0.000  | -1.147 | P | 243.123   | P | 504.284   | P | 1116.512  | -2.199 | LOC_Os05g34770.1 |
| DG <sub>0</sub> | Os057068_02 | S3 | 1.656  | 0.000  | P | 136.616   | P | 430.398   | P | 719.798   | -2.397 | LOC_Os08g04390.2 |
| DG <sub>0</sub> | Os057254_02 | S3 | 0.000  | 1.366  | P | 41180.030 | P | 27824.079 | P | 10793.176 | 1.932  | -                |
| DG <sub>0</sub> | Os057481_02 | S3 | 1.253  | 0.000  | P | 124.842   | P | 297.622   | P | 416.199   | -1.737 | LOC_Os04g43390.1 |
| DG <sub>0</sub> | Os057614_02 | S3 | 1.994  | 0.000  | P | 112.019   | P | 446.126   | P | 511.801   | -2.192 | LOC_Os06g22060.1 |
| DG <sub>0</sub> | Os057647_02 | S3 | 2.228  | 0.000  | P | 126.616   | P | 593.160   | P | 1116.065  | -3.140 | -                |
| DG <sub>0</sub> | Os000252_01 | S6 | 0.984  | 0.000  | P | 227.187   | P | 449.440   | P | 506.898   | -1.158 | LOC_Os02g47140.2 |
| DG <sub>0</sub> | Os000282_01 | S6 | 0.000  | -0.880 | P | 516.492   | P | 652.508   | P | 1200.853  | -1.217 | LOC_Os03g60100.1 |
| DG <sub>0</sub> | Os000322_01 | S6 | -1.441 | 0.000  | P | 794.664   | P | 292.598   | P | 362.852   | 1.131  | LOC_Os07g28610.2 |
| DG <sub>0</sub> | Os000375_01 | S6 | 0.000  | -0.808 | P | 1278.712  | P | 1688.329  | P | 2956.818  | -1.209 | LOC_Os02g09590.1 |
| DG <sub>0</sub> | Os000431_01 | S6 | -1.181 | 1.224  | P | 26743.943 | P | 11795.114 | P | 5047.911  | 2.405  | LOC_Os01g68300.1 |
| DG <sub>0</sub> | Os000754_01 | S6 | 0.000  | 1.547  | P | 428.814   | P | 413.153   | P | 141.344   | 1.601  | LOC_Os12g19304.3 |
| DG <sub>0</sub> | Os000965_01 | S6 | 0.000  | 0.907  | P | 986.300   | P | 856.516   | P | 456.791   | 1.110  | LOC_Os01g73990.1 |
| DG <sub>0</sub> | Os000994_01 | S6 | 0.000  | -1.351 | P | 429.314   | P | 478.596   | P | 1220.749  | -1.508 | -                |
| DG <sub>0</sub> | Os001903_01 | S6 | 0.000  | 2.416  | P | 602.550   | P | 1101.214  | P | 206.285   | 1.546  | LOC_Os01g68290.1 |
| DG <sub>0</sub> | Os002325_01 | S6 | -1.467 | 0.000  | P | 2633.235  | P | 952.566   | P | 1151.093  | 1.194  | LOC_Os09g38750.1 |
| DG <sub>0</sub> | Os002353_01 | S6 | 0.000  | -1.449 | P | 337.468   | P | 569.621   | P | 1554.653  | -2.204 | LOC_Os03g38470.1 |
| DG <sub>0</sub> | Os002390_01 | S6 | -1.743 | 0.000  | P | 2163.016  | P | 646.358   | P | 761.834   | 1.505  | LOC_Os07g05360.1 |
| DG <sub>0</sub> | Os002678_01 | S6 | -1.414 | 0.880  | P | 3326.571  | P | 1248.755  | P | 678.329   | 2.294  | LOC_Os05g03920.1 |
| DG <sub>0</sub> | Os002866_01 | S6 | 0.000  | 1.186  | P | 806.925   | P | 637.596   | P | 280.316   | 1.525  | LOC_Os03g57690.1 |
| DG <sub>0</sub> | Os003186_01 | S6 | 1.202  | -0.792 | P | 372.858   | P | 857.922   | P | 1485.322  | -1.994 | LOC_Os05g46780.1 |
| DG <sub>0</sub> | Os003424_01 | S6 | 0.000  | 1.042  | P | 484.028   | P | 312.263   | P | 151.679   | 1.674  | LOC_Os12g29550.1 |
| DG <sub>0</sub> | Os004287_01 | S6 | 0.000  | 1.008  | P | 270.357   | P | 228.281   | P | 113.508   | 1.252  | LOC_Os03g28140.1 |
| DG <sub>0</sub> | Os004406_01 | S6 | 0.000  | 0.868  | P | 1392.562  | P | 953.576   | P | 522.635   | 1.414  | LOC_Os09g28390.1 |
| DG <sub>0</sub> | Os006592_01 | S6 | -1.085 | 0.000  | P | 732.091   | P | 345.214   | P | 199.023   | 1.879  | -                |
| DG <sub>0</sub> | Os007747_01 | S6 | -1.136 | 0.000  | P | 592.611   | P | 269.625   | P | 216.345   | 1.454  | LOC_Os02g06300.1 |
| DG <sub>0</sub> | Os008169_01 | S6 | -1.502 | 1.288  | P | 2203.978  | P | 778.315   | P | 318.650   | 2.790  | LOC_Os02g40240.2 |
| DG <sub>0</sub> | Os008192_01 | S6 | -1.139 | 0.000  | P | 740.190   | P | 336.114   | P | 268.490   | 1.463  | LOC_Os09g24620.1 |

|                 |                |        |        |   |          |   |          |   |          |        |                  |
|-----------------|----------------|--------|--------|---|----------|---|----------|---|----------|--------|------------------|
| DG <sub>o</sub> | Os008529_01 S6 | 1.430  | 0.000  | P | 234.250  | P | 631.368  | P | 808.045  | -1.786 | LOC_Os07g02210.2 |
| DG <sub>o</sub> | Os008538_01 S6 | -1.204 | 0.000  | P | 734.371  | P | 318.808  | P | 272.530  | 1.430  | LOC_Os03g18070.1 |
| DG <sub>o</sub> | Os008602_01 S6 | -1.265 | 0.000  | P | 1066.366 | P | 443.864  | P | 433.111  | 1.300  | LOC_Os05g06920.1 |
| DG <sub>o</sub> | Os008805_01 S6 | 0.000  | 0.973  | P | 329.988  | P | 252.888  | P | 128.820  | 1.357  | -                |
| DG <sub>o</sub> | Os008896_01 S6 | 0.956  | 0.000  | P | 222.007  | P | 430.685  | P | 616.086  | -1.473 | LOC_Os04g51520.1 |
| DG <sub>o</sub> | Os009377_01 S6 | -0.916 | 0.000  | P | 651.496  | P | 345.266  | P | 262.607  | 1.311  | LOC_Os12g12580.1 |
| DG <sub>o</sub> | Os009604_01 S6 | 0.000  | 1.227  | P | 535.732  | P | 525.105  | P | 224.302  | 1.256  | LOC_Os07g43810.1 |
| DG <sub>o</sub> | Os009787_01 S6 | 2.293  | 0.000  | P | 440.810  | P | 2160.500 | P | 3364.262 | -2.932 | LOC_Os07g23120.1 |
| DG <sub>o</sub> | Os009844_01 S6 | -1.008 | 0.000  | P | 6854.300 | P | 3407.674 | P | 2957.533 | 1.213  | LOC_Os12g08730.1 |
| DG <sub>o</sub> | Os009881_01 S6 | 1.233  | 0.000  | P | 266.157  | P | 625.522  | P | 856.858  | -1.687 | LOC_Os06g05180.1 |
| DG <sub>o</sub> | Os010073_01 S6 | 0.000  | -1.347 | P | 220.344  | P | 385.421  | P | 980.525  | -2.154 | LOC_Os07g40986.1 |
| DG <sub>o</sub> | Os010136_01 S6 | 0.000  | 1.755  | P | 1439.671 | P | 1020.808 | P | 302.425  | 2.251  | LOC_Os11g06730.1 |
| DG <sub>o</sub> | Os010501_01 S6 | -0.918 | 0.000  | P | 923.602  | P | 488.845  | P | 369.995  | 1.320  | LOC_Os09g26670.1 |
| DG <sub>o</sub> | Os010507_01 S6 | 0.000  | 1.070  | P | 323.859  | P | 291.929  | P | 139.039  | 1.220  | -                |
| DG <sub>o</sub> | Os010677_01 S6 | 0.000  | 0.867  | P | 485.746  | P | 389.659  | P | 213.642  | 1.185  | -                |
| DG <sub>o</sub> | Os010947_01 S6 | 0.000  | 1.114  | P | 551.844  | P | 374.926  | P | 173.265  | 1.671  | -                |
| DG <sub>o</sub> | Os011079_01 S6 | 0.000  | 1.251  | P | 300.241  | P | 295.483  | P | 124.111  | 1.274  | LOC_Os04g45920.1 |
| DG <sub>o</sub> | Os011090_01 S6 | 0.000  | 1.080  | P | 584.649  | P | 413.298  | P | 195.443  | 1.581  | LOC_Os04g31140.1 |
| DG <sub>o</sub> | Os011207_01 S6 | 1.161  | 0.000  | P | 108.249  | P | 241.984  | P | 258.058  | -1.253 | LOC_Os02g16620.1 |
| DG <sub>o</sub> | Os011344_01 S6 | 0.000  | 1.449  | P | 1388.352 | P | 1079.997 | P | 395.489  | 1.812  | -                |
| DG <sub>o</sub> | Os011816_01 S6 | -1.480 | 0.000  | P | 651.060  | P | 233.381  | P | 204.388  | 1.671  | -                |
| DG <sub>o</sub> | Os012005_01 S6 | 0.000  | 1.010  | P | 465.087  | P | 384.773  | P | 191.079  | 1.283  | LOC_Os03g58640.1 |
| DG <sub>o</sub> | Os012205_01 S6 | 0.000  | -1.194 | P | 205.011  | P | 277.114  | P | 633.832  | -1.628 | LOC_Os01g74650.3 |
| DG <sub>o</sub> | Os012299_01 S6 | 0.000  | -0.880 | P | 375.103  | P | 667.581  | P | 1228.373 | -1.711 | LOC_Os09g38030.1 |
| DG <sub>o</sub> | Os012329_01 S6 | 0.000  | -1.291 | P | 404.274  | P | 675.408  | P | 1652.665 | -2.031 | LOC_Os03g34040.1 |
| DG <sub>o</sub> | Os012915_01 S6 | 0.000  | 0.868  | P | 593.400  | P | 384.083  | P | 210.492  | 1.495  | LOC_Os01g61970.1 |
| DG <sub>o</sub> | Os013267_01 S6 | -0.934 | 0.000  | P | 1165.929 | P | 610.175  | P | 351.850  | 1.728  | LOC_Os02g29550.2 |
| DG <sub>o</sub> | Os013284_01 S6 | 0.000  | -0.997 | P | 527.015  | P | 707.241  | P | 1412.009 | -1.422 | LOC_Os09g28630.1 |
| DG <sub>o</sub> | Os013532_01 S6 | -1.101 | 1.014  | P | 1491.245 | P | 695.359  | P | 344.342  | 2.115  | LOC_Os01g55094.2 |
| DG <sub>o</sub> | Os013619_01 S6 | -1.062 | 0.000  | P | 439.775  | P | 210.699  | P | 173.962  | 1.338  | -                |
| DG <sub>o</sub> | Os013668_01 S6 | 0.945  | 0.000  | P | 124.937  | P | 240.464  | P | 300.958  | -1.268 | LOC_Os03g42900.1 |

|                 |             |    |        |        |   |          |   |          |   |          |        |                  |
|-----------------|-------------|----|--------|--------|---|----------|---|----------|---|----------|--------|------------------|
| DG <sub>o</sub> | Os013987_01 | S6 | 0.971  | -0.898 | P | 187.089  | P | 366.852  | P | 683.656  | -1.870 | LOC_Os08g01170.1 |
| DG <sub>o</sub> | Os014273_01 | S6 | -1.749 | 0.000  | P | 551.005  | P | 163.928  | P | 229.283  | 1.265  | LOC_Os03g48030.1 |
| DG <sub>o</sub> | Os014301_01 | S6 | 0.939  | 0.000  | P | 625.955  | P | 1200.455 | P | 1776.184 | -1.505 | -                |
| DG <sub>o</sub> | Os014374_01 | S6 | -0.994 | 1.049  | P | 999.954  | P | 502.037  | P | 242.618  | 2.043  | LOC_Os10g26990.1 |
| DG <sub>o</sub> | Os014490_01 | S6 | 0.000  | 0.859  | P | 372.183  | P | 234.492  | P | 129.326  | 1.525  | LOC_Os02g13100.1 |
| DG <sub>o</sub> | Os014533_01 | S6 | 1.126  | 0.000  | P | 148.987  | P | 325.082  | P | 343.906  | -1.207 | LOC_Os07g37650.1 |
| DG <sub>o</sub> | Os014740_01 | S6 | -1.126 | -2.222 | P | 1109.617 | P | 508.547  | P | 2371.947 | -1.096 | LOC_Os07g36080.1 |
| DG <sub>o</sub> | Os015156_01 | S6 | -1.139 | 0.000  | P | 1022.210 | P | 464.119  | P | 296.108  | 1.787  | LOC_Os01g08460.1 |
| DG <sub>o</sub> | Os015744_01 | S6 | -0.932 | 0.000  | P | 1561.075 | P | 818.017  | P | 535.428  | 1.544  | LOC_Os04g54790.1 |
| DG <sub>o</sub> | Os015845_01 | S6 | 1.060  | 0.000  | P | 128.349  | P | 267.551  | P | 403.723  | -1.653 | LOC_Os05g03550.1 |
| DG <sub>o</sub> | Os016108_01 | S6 | 0.000  | 0.805  | P | 542.009  | P | 322.881  | P | 184.777  | 1.553  | LOC_Os03g52720.1 |
| DG <sub>o</sub> | Os016218_01 | S6 | 0.000  | -1.061 | P | 514.991  | P | 531.565  | P | 1109.134 | -1.107 | LOC_Os03g53300.2 |
| DG <sub>o</sub> | Os016284_01 | S6 | 0.000  | 0.860  | P | 788.997  | P | 521.527  | P | 287.310  | 1.457  | LOC_Os05g34650.1 |
| DG <sub>o</sub> | Os016758_01 | S6 | 1.431  | 0.000  | P | 176.360  | P | 475.604  | P | 466.157  | -1.402 | LOC_Os11g32110.4 |
| DG <sub>o</sub> | Os016770_01 | S6 | -1.050 | 1.136  | P | 984.028  | P | 475.169  | P | 216.228  | 2.186  | LOC_Os07g30760.2 |
| DG <sub>o</sub> | Os016790_01 | S6 | 0.000  | 1.245  | P | 529.984  | P | 354.435  | P | 149.562  | 1.825  | LOC_Os04g38220.1 |
| DG <sub>o</sub> | Os016859_01 | S6 | 0.000  | -0.961 | P | 296.773  | P | 359.705  | P | 700.395  | -1.239 | LOC_Os05g37520.1 |
| DG <sub>o</sub> | Os016869_01 | S6 | 0.000  | 1.121  | P | 2734.130 | P | 2560.072 | P | 1177.047 | 1.216  | LOC_Os01g08700.6 |
| DG <sub>o</sub> | Os016870_01 | S6 | 0.000  | 0.856  | P | 721.178  | P | 455.638  | P | 251.757  | 1.518  | LOC_Os02g56280.1 |
| DG <sub>o</sub> | Os016972_01 | S6 | 1.590  | 0.000  | P | 137.903  | P | 415.018  | P | 615.133  | -2.157 | LOC_Os12g20150.1 |
| DG <sub>o</sub> | Os017058_01 | S6 | 1.347  | 0.000  | P | 377.466  | P | 960.075  | P | 962.362  | -1.350 | LOC_Os05g33940.1 |
| DG <sub>o</sub> | Os017063_01 | S6 | 0.963  | 0.000  | P | 104.792  | P | 204.314  | P | 247.870  | -1.242 | LOC_Os02g34840.1 |
| DG <sub>o</sub> | Os017372_01 | S6 | -0.913 | 0.000  | P | 494.575  | P | 262.604  | P | 192.521  | 1.361  | LOC_Os11g45720.1 |
| DG <sub>o</sub> | Os017820_01 | S6 | 0.000  | -0.772 | P | 275.540  | P | 388.539  | P | 663.287  | -1.267 | LOC_Os04g36062.1 |
| DG <sub>o</sub> | Os018072_01 | S6 | 1.907  | -0.786 | P | 151.710  | P | 569.134  | P | 981.595  | -2.694 | LOC_Os05g46250.1 |
| DG <sub>o</sub> | Os018214_01 | S6 | 0.952  | 0.000  | P | 114.819  | P | 222.174  | P | 301.070  | -1.391 | LOC_Os08g12750.2 |
| DG <sub>o</sub> | Os018327_01 | S6 | 0.920  | 0.000  | P | 192.496  | P | 364.222  | P | 427.037  | -1.150 | LOC_Os12g05650.1 |
| DG <sub>o</sub> | Os018432_01 | S6 | 1.050  | 0.000  | P | 146.083  | P | 302.567  | P | 313.947  | -1.104 | LOC_Os08g42420.5 |
| DG <sub>o</sub> | Os018766_01 | S6 | -1.297 | 0.000  | P | 1153.050 | P | 469.203  | P | 350.216  | 1.719  | LOC_Os04g40670.1 |
| DG <sub>o</sub> | Os018767_01 | S6 | 0.000  | 1.114  | P | 660.787  | P | 524.051  | P | 242.064  | 1.449  | LOC_Os04g32050.1 |
| DG <sub>o</sub> | Os018786_01 | S6 | 0.000  | 1.465  | P | 1034.521 | P | 930.932  | P | 337.181  | 1.617  | LOC_Os03g16670.1 |

|                 |             |    |        |        |   |          |   |          |   |          |        |                  |
|-----------------|-------------|----|--------|--------|---|----------|---|----------|---|----------|--------|------------------|
| DG <sub>0</sub> | Os018818_01 | S6 | -1.193 | 1.114  | P | 1417.543 | P | 620.230  | P | 286.456  | 2.307  | -                |
| DG <sub>0</sub> | Os020088_01 | S6 | 0.000  | -0.977 | P | 263.385  | P | 387.207  | P | 762.309  | -1.533 | LOC_Os05g03120.2 |
| DG <sub>0</sub> | Os020367_01 | S6 | 0.000  | 1.214  | P | 268.804  | P | 276.903  | P | 119.372  | 1.171  | LOC_Os01g15630.1 |
| DG <sub>0</sub> | Os020392_01 | S6 | 0.000  | 1.204  | P | 1207.828 | P | 663.678  | P | 288.077  | 2.068  | LOC_Os03g15050.2 |
| DG <sub>0</sub> | Os020398_01 | S6 | 0.000  | -1.212 | P | 224.163  | P | 250.880  | P | 581.275  | -1.375 | LOC_Os03g54000.1 |
| DG <sub>0</sub> | Os020694_01 | S6 | 1.193  | -0.794 | P | 196.018  | P | 448.155  | P | 776.972  | -1.987 | LOC_Os09g33680.1 |
| DG <sub>0</sub> | Os020765_01 | S6 | 0.974  | 0.000  | P | 305.109  | P | 599.292  | P | 742.751  | -1.284 | LOC_Os01g09990.1 |
| DG <sub>0</sub> | Os020930_01 | S6 | 1.023  | -0.904 | P | 231.971  | P | 471.289  | P | 881.965  | -1.927 | LOC_Os06g04390.1 |
| DG <sub>0</sub> | Os021254_01 | S6 | 0.000  | -1.095 | P | 170.764  | P | 237.729  | P | 507.779  | -1.572 | LOC_Os02g46660.1 |
| DG <sub>0</sub> | Os021365_01 | S6 | 0.000  | 0.887  | P | 436.097  | P | 377.059  | P | 203.827  | 1.097  | LOC_Os08g24434.1 |
| DG <sub>0</sub> | Os021726_01 | S6 | 1.348  | 0.000  | P | 496.722  | P | 1264.868 | P | 1435.566 | -1.531 | LOC_Os03g06080.1 |
| DG <sub>0</sub> | Os021757_01 | S6 | 0.000  | 1.188  | P | 616.787  | P | 398.650  | P | 175.002  | 1.817  | LOC_Os09g36740.1 |
| DG <sub>0</sub> | Os021870_01 | S6 | 0.000  | -1.062 | P | 208.386  | P | 318.358  | P | 664.483  | -1.673 | LOC_Os07g41060.1 |
| DG <sub>0</sub> | Os022228_01 | S6 | -0.929 | 0.000  | P | 1696.737 | P | 891.331  | P | 634.722  | 1.419  | LOC_Os10g41250.1 |
| DG <sub>0</sub> | Os022291_01 | S6 | 0.000  | -0.772 | P | 611.475  | P | 1115.651 | P | 1904.726 | -1.639 | LOC_Os03g16880.1 |
| DG <sub>0</sub> | Os022309_01 | S6 | 0.000  | -0.768 | P | 377.104  | P | 573.975  | P | 977.547  | -1.374 | LOC_Os05g10670.1 |
| DG <sub>0</sub> | Os022434_01 | S6 | -1.163 | 0.000  | P | 961.959  | P | 429.466  | P | 424.021  | 1.182  | LOC_Os01g67310.1 |
| DG <sub>0</sub> | Os022563_01 | S6 | 0.923  | 0.000  | P | 125.587  | P | 238.126  | P | 336.490  | -1.422 | LOC_Os06g04290.1 |
| DG <sub>0</sub> | Os022620_01 | S6 | 1.119  | 0.000  | P | 260.472  | P | 565.675  | P | 894.493  | -1.780 | LOC_Os10g09930.1 |
| DG <sub>0</sub> | Os022954_01 | S6 | 0.000  | 1.118  | P | 606.414  | P | 563.408  | P | 259.663  | 1.224  | LOC_Os08g34170.1 |
| DG <sub>0</sub> | Os023118_01 | S6 | 2.711  | -0.835 | P | 125.070  | P | 819.182  | P | 1461.105 | -3.546 | LOC_Os07g11120.1 |
| DG <sub>0</sub> | Os023350_01 | S6 | -1.225 | 0.000  | P | 3410.538 | P | 1459.112 | P | 998.281  | 1.772  | LOC_Os12g42280.1 |
| DG <sub>0</sub> | Os023589_01 | S6 | 1.578  | -0.813 | P | 229.898  | P | 686.599  | P | 1206.528 | -2.392 | LOC_Os05g05650.1 |
| DG <sub>0</sub> | Os023983_01 | S6 | 1.345  | 0.000  | P | 248.225  | P | 630.516  | P | 953.833  | -1.942 | LOC_Os02g58500.1 |
| DG <sub>0</sub> | Os023998_01 | S6 | 0.000  | 0.813  | P | 664.980  | P | 361.908  | P | 205.944  | 1.691  | LOC_Os08g42570.1 |
| DG <sub>0</sub> | Os024078_01 | S6 | 0.921  | 0.000  | P | 150.673  | P | 285.228  | P | 366.953  | -1.284 | LOC_Os06g44250.1 |
| DG <sub>0</sub> | Os024270_01 | S6 | 1.496  | 0.000  | P | 298.722  | P | 842.817  | P | 663.793  | -1.152 | LOC_Os05g36990.1 |
| DG <sub>0</sub> | Os024437_01 | S6 | -1.054 | 0.000  | P | 1014.893 | P | 488.739  | P | 450.950  | 1.170  | -                |
| DG <sub>0</sub> | Os024561_01 | S6 | 0.000  | -0.918 | P | 397.277  | P | 526.316  | P | 994.647  | -1.324 | LOC_Os04g01740.1 |
| DG <sub>0</sub> | Os024616_01 | S6 | 0.000  | 0.900  | P | 508.347  | P | 387.241  | P | 207.485  | 1.293  | -                |
| DG <sub>0</sub> | Os024723_01 | S6 | -1.304 | 0.000  | P | 531.685  | P | 215.405  | P | 181.232  | 1.553  | LOC_Os11g05490.1 |



|                 |             |    |        |        |   |          |   |           |   |           |        |                  |
|-----------------|-------------|----|--------|--------|---|----------|---|-----------|---|-----------|--------|------------------|
| DG <sub>o</sub> | Os024778_01 | S6 | 0.949  | 0.000  | P | 140.458  | P | 271.247   | P | 385.018   | -1.455 | LOC_Os05g30800.1 |
| DG <sub>o</sub> | Os024882_01 | S6 | 0.000  | 1.119  | P | 367.303  | P | 371.276   | P | 170.960   | 1.103  | LOC_Os09g31120.1 |
| DG <sub>o</sub> | Os025405_01 | S6 | 0.000  | 2.409  | P | 1136.781 | P | 792.617   | P | 149.203   | 2.930  | LOC_Os10g41960.1 |
| DG <sub>o</sub> | Os025528_01 | S6 | 0.000  | -0.829 | P | 8361.827 | P | 13534.397 | P | 24038.246 | -1.523 | -                |
| DG <sub>o</sub> | Os025762_01 | S6 | 0.000  | 1.570  | P | 1208.171 | P | 696.465   | P | 234.592   | 2.365  | LOC_Os05g25260.1 |
| DG <sub>o</sub> | Os025815_01 | S6 | 0.986  | 0.000  | P | 154.889  | P | 306.769   | P | 337.772   | -1.125 | LOC_Os01g67410.1 |
| DG <sub>o</sub> | Os025832_01 | S6 | 1.013  | 0.000  | P | 229.385  | P | 462.773   | P | 500.325   | -1.125 | LOC_Os04g33240.1 |
| DG <sub>o</sub> | Os025959_01 | S6 | 0.000  | 1.343  | P | 850.488  | P | 753.489   | P | 296.977   | 1.518  | LOC_Os12g43780.1 |
| DG <sub>o</sub> | Os027934_01 | S6 | 0.000  | -0.768 | P | 153.762  | P | 203.512   | P | 346.580   | -1.172 | LOC_Os06g06270.1 |
| DG <sub>o</sub> | Os028157_01 | S6 | 0.000  | 1.382  | P | 1787.603 | P | 1242.201  | P | 476.647   | 1.907  | LOC_Os10g32110.1 |
| DG <sub>o</sub> | Os028605_01 | S6 | -1.375 | 0.000  | P | 905.647  | P | 349.227   | P | 284.322   | 1.671  | LOC_Os02g06380.1 |
| DG <sub>o</sub> | Os028624_01 | S6 | 0.941  | 0.000  | P | 3027.486 | P | 5814.242  | P | 8369.570  | -1.467 | LOC_Os06g02010.1 |
| DG <sub>o</sub> | Os028680_01 | S6 | 1.827  | -1.435 | P | 147.548  | P | 523.601   | P | 1416.101  | -3.263 | LOC_Os07g06100.1 |
| DG <sub>o</sub> | Os028834_01 | S6 | 0.946  | 0.000  | P | 807.996  | P | 1556.477  | P | 1876.090  | -1.215 | LOC_Os03g27070.1 |
| DG <sub>o</sub> | Os029713_01 | S6 | 0.000  | 1.271  | P | 4651.137 | P | 3760.475  | P | 1557.808  | 1.578  | LOC_Os07g30990.1 |
| DG <sub>o</sub> | Os029791_01 | S6 | 0.000  | 1.562  | P | 960.327  | P | 630.531   | P | 213.560   | 2.169  | LOC_Os02g52200.1 |
| DG <sub>o</sub> | Os029928_01 | S6 | -1.193 | 0.000  | P | 349.204  | P | 152.778   | P | 137.818   | 1.341  | -                |
| DG <sub>o</sub> | Os030028_01 | S6 | 1.357  | -1.280 | P | 207.732  | P | 532.262   | P | 1292.912  | -2.638 | LOC_Os01g02710.1 |
| DG <sub>o</sub> | Os030119_01 | S6 | -0.979 | 0.820  | P | 913.096  | P | 463.162   | P | 262.276   | 1.800  | LOC_Os02g03210.1 |
| DG <sub>o</sub> | Os031388_01 | S6 | 0.959  | 0.000  | P | 194.708  | P | 378.429   | P | 494.736   | -1.345 | LOC_Os01g08350.1 |
| DG <sub>o</sub> | Os032897_01 | S6 | -1.589 | 0.000  | P | 680.634  | P | 226.238   | P | 166.192   | 2.034  | LOC_Os03g44850.1 |
| DG <sub>o</sub> | Os033072_01 | S6 | 0.928  | 0.000  | P | 134.931  | P | 256.813   | P | 351.086   | -1.380 | LOC_Os12g29230.1 |
| DG <sub>o</sub> | Os033915_01 | S6 | 1.352  | 0.000  | P | 288.392  | P | 736.092   | P | 1102.521  | -1.935 | LOC_Os11g45530.1 |
| DG <sub>o</sub> | Os036373_01 | S6 | 1.226  | 0.000  | P | 639.598  | P | 1495.886  | P | 2129.973  | -1.736 | LOC_Os04g03250.1 |
| DG <sub>o</sub> | Os038005_01 | S6 | 0.000  | -0.985 | P | 351.267  | P | 391.043   | P | 774.229   | -1.140 | LOC_Os01g71970.1 |
| DG <sub>o</sub> | Os038103_01 | S6 | 0.000  | -0.793 | P | 127.497  | P | 187.553   | P | 324.894   | -1.350 | LOC_Os10g26670.1 |
| DG <sub>o</sub> | Os038408_01 | S6 | -1.327 | 0.000  | P | 1689.034 | P | 673.348   | P | 600.252   | 1.493  | LOC_Os09g25700.1 |
| DG <sub>o</sub> | Os038619_01 | S6 | -1.425 | 0.000  | P | 793.594  | P | 295.611   | P | 309.174   | 1.360  | -                |
| DG <sub>o</sub> | Os038695_01 | S6 | 1.105  | 0.000  | P | 154.038  | P | 331.377   | P | 470.713   | -1.612 | -                |
| DG <sub>o</sub> | Os038872_01 | S6 | -0.978 | 0.000  | P | 573.762  | P | 291.312   | P | 221.420   | 1.374  | LOC_Os12g12590.1 |
| DG <sub>o</sub> | Os040328_01 | S6 | 0.000  | -1.309 | P | 128.360  | P | 210.649   | P | 521.885   | -2.024 | LOC_Os05g31400.1 |

|                 |             |    |        |        |   |           |   |           |   |          |        |                  |
|-----------------|-------------|----|--------|--------|---|-----------|---|-----------|---|----------|--------|------------------|
| DG <sub>o</sub> | Os041632_01 | S6 | 1.088  | 0.000  | P | 155.659   | P | 330.934   | P | 460.310  | -1.564 | -                |
| DG <sub>o</sub> | Os042725_01 | S6 | 0.000  | 0.999  | P | 498.891   | P | 290.265   | P | 145.195  | 1.781  | LOC_Os07g35740.1 |
| DG <sub>o</sub> | Os043254_01 | S6 | -0.915 | 1.116  | P | 1091.282  | P | 578.699   | P | 267.053  | 2.031  | LOC_Os09g18070.1 |
| DG <sub>o</sub> | Os043506_01 | S6 | 0.979  | 0.000  | P | 1560.361  | P | 3076.214  | P | 3767.608 | -1.272 | LOC_Os07g35880.1 |
| DG <sub>o</sub> | Os043803_01 | S6 | 0.000  | 1.462  | P | 393.195   | P | 419.599   | P | 152.355  | 1.368  | LOC_Os04g20280.1 |
| DG <sub>o</sub> | Os044170_01 | S6 | 0.000  | 1.367  | P | 1363.415  | P | 818.623   | P | 317.338  | 2.103  | LOC_Os01g40200.1 |
| DG <sub>o</sub> | Os044300_01 | S6 | -0.918 | 1.388  | P | 28043.626 | P | 14837.351 | P | 5668.032 | 2.307  | LOC_Os05g11320.1 |
| DG <sub>o</sub> | Os044585_01 | S6 | 0.000  | 1.768  | P | 1065.869  | P | 606.276   | P | 177.972  | 2.582  | LOC_Os05g14360.1 |
| DG <sub>o</sub> | Os044943_01 | S6 | 1.025  | 0.000  | P | 2065.793  | P | 4203.118  | P | 5129.766 | -1.312 | LOC_Os07g47750.1 |
| DG <sub>o</sub> | Os045112_01 | S6 | 0.000  | 1.844  | P | 1012.676  | P | 623.743   | P | 173.707  | 2.543  | -                |
| DG <sub>o</sub> | Os045347_01 | S6 | 2.099  | -1.003 | P | 107.935   | P | 462.411   | P | 926.753  | -3.102 | LOC_Os06g18120.1 |
| DG <sub>o</sub> | Os045398_01 | S6 | 0.980  | 0.000  | P | 112.682   | P | 222.240   | P | 255.839  | -1.183 | LOC_Os12g25450.1 |
| DG <sub>o</sub> | Os045474_01 | S6 | 0.000  | -0.998 | P | 161.116   | P | 175.841   | P | 351.292  | -1.125 | LOC_Os06g11610.1 |
| DG <sub>o</sub> | Os045632_01 | S6 | -1.058 | 0.000  | P | 1614.371  | P | 775.501   | P | 594.596  | 1.441  | LOC_Os07g18070.1 |
| DG <sub>o</sub> | Os045661_01 | S6 | -1.045 | 0.000  | P | 343.298   | P | 166.390   | P | 150.586  | 1.189  | LOC_Os10g23180.1 |
| DG <sub>o</sub> | Os045935_01 | S6 | 0.000  | 1.541  | P | 634.745   | P | 489.853   | P | 168.347  | 1.915  | LOC_Os08g16790.1 |
| DG <sub>o</sub> | Os045964_01 | S6 | 1.115  | 0.000  | P | 144.436   | P | 312.767   | P | 487.065  | -1.754 | -                |
| DG <sub>o</sub> | Os046147_01 | S6 | 1.266  | 0.000  | P | 188.407   | P | 453.174   | P | 402.450  | -1.095 | LOC_Os03g10280.1 |
| DG <sub>o</sub> | Os046783_01 | S6 | 1.322  | -0.840 | P | 222.162   | P | 555.576   | P | 994.794  | -2.163 | LOC_Os01g13860.1 |
| DG <sub>o</sub> | Os047260_01 | S6 | 0.000  | 0.930  | P | 9137.287  | P | 5527.999  | P | 2902.040 | 1.655  | LOC_Os06g34840.1 |
| DG <sub>o</sub> | Os047560_01 | S6 | -1.378 | 0.000  | P | 1199.446  | P | 461.453   | P | 361.576  | 1.730  | LOC_Os07g12890.1 |
| DG <sub>o</sub> | Os048668_01 | S6 | -1.365 | 0.000  | P | 516.053   | P | 200.413   | P | 229.727  | 1.168  | LOC_Os06g43740.1 |
| DG <sub>o</sub> | Os049163_01 | S6 | 1.318  | 0.000  | P | 118.221   | P | 294.700   | P | 264.099  | -1.160 | -                |
| DG <sub>o</sub> | Os050312_01 | S6 | -0.980 | 0.000  | P | 3750.263  | P | 1901.726  | P | 1101.093 | 1.768  | -                |
| DG <sub>o</sub> | Os050385_01 | S6 | 0.000  | 0.916  | P | 678.797   | P | 400.963   | P | 212.479  | 1.676  | -                |
| DG <sub>o</sub> | Os051104_01 | S6 | 0.000  | 0.994  | P | 854.876   | P | 741.080   | P | 372.009  | 1.200  | -                |
| DG <sub>o</sub> | Os051409_01 | S6 | 0.000  | 1.114  | P | 522.929   | P | 443.958   | P | 205.062  | 1.351  | LOC_Os12g09954.1 |
| DG <sub>o</sub> | Os051817_01 | S6 | 0.000  | 1.562  | P | 565.195   | P | 606.927   | P | 205.601  | 1.459  | LOC_Os03g30660.1 |
| DG <sub>o</sub> | Os051935_01 | S6 | 1.783  | -1.306 | P | 283.152   | P | 974.493   | P | 2409.692 | -3.089 | LOC_Os01g15270.1 |
| DG <sub>o</sub> | Os051956_01 | S6 | -2.714 | -1.298 | P | 8110.108  | P | 1236.032  | P | 3039.112 | 1.416  | LOC_Os07g37240.1 |
| DG <sub>o</sub> | Os052060_01 | S6 | 0.000  | 0.803  | P | 1156.329  | P | 861.146   | P | 493.458  | 1.229  | LOC_Os08g43580.1 |

|                 |             |    |        |        |   |          |   |          |   |          |        |                  |
|-----------------|-------------|----|--------|--------|---|----------|---|----------|---|----------|--------|------------------|
| DG <sub>o</sub> | Os052084_01 | S6 | 0.000  | 0.911  | P | 549.872  | P | 394.280  | P | 209.736  | 1.391  | LOC_Os11g32650.1 |
| DG <sub>o</sub> | Os052148_01 | S6 | 1.019  | 0.000  | P | 163.722  | P | 331.742  | P | 409.175  | -1.321 | -                |
| DG <sub>o</sub> | Os052183_01 | S6 | 0.000  | 0.910  | P | 246.018  | P | 190.885  | P | 101.552  | 1.277  | LOC_Os01g66960.1 |
| DG <sub>o</sub> | Os052637_01 | S6 | 0.000  | 0.874  | P | 480.852  | P | 412.565  | P | 225.115  | 1.095  | -                |
| DG <sub>o</sub> | Os052672_01 | S6 | 0.959  | -0.846 | P | 136.308  | P | 265.028  | P | 476.465  | -1.805 | LOC_Os01g62810.2 |
| DG <sub>o</sub> | Os052686_01 | S6 | -1.000 | 0.000  | P | 909.323  | P | 454.506  | P | 291.290  | 1.642  | LOC_Os10g26620.1 |
| DG <sub>o</sub> | Os052823_01 | S6 | -1.363 | 0.000  | P | 3345.283 | P | 1300.703 | P | 847.208  | 1.981  | LOC_Os02g09460.1 |
| DG <sub>o</sub> | Os054267_01 | S6 | 1.262  | 0.000  | P | 515.002  | P | 1235.009 | P | 1188.720 | -1.207 | -                |
| DG <sub>o</sub> | Os054577_01 | S6 | 1.430  | 0.000  | P | 109.871  | P | 296.030  | P | 444.386  | -2.016 | LOC_Os04g55920.2 |
| DG <sub>o</sub> | Os054595_01 | S6 | 1.049  | 0.000  | P | 271.426  | P | 561.540  | P | 707.675  | -1.383 | LOC_Os04g32950.1 |
| DG <sub>o</sub> | Os054604_01 | S6 | 0.000  | 1.484  | P | 1466.830 | P | 1901.860 | P | 679.878  | 1.109  | LOC_Os07g39350.1 |
| DG <sub>o</sub> | Os054627_01 | S6 | 0.000  | 1.026  | P | 1865.317 | P | 1154.342 | P | 566.883  | 1.718  | LOC_Os01g73940.1 |
| DG <sub>o</sub> | Os054657_01 | S6 | 0.000  | 3.563  | P | 2850.569 | P | 1872.486 | P | 158.434  | 4.169  | LOC_Os02g13870.1 |
| DG <sub>o</sub> | Os054752_01 | S6 | -1.105 | 0.000  | P | 1161.827 | P | 540.254  | P | 525.985  | 1.143  | -                |
| DG <sub>o</sub> | Os054826_01 | S6 | 1.079  | 0.000  | P | 238.611  | P | 503.913  | P | 746.794  | -1.646 | LOC_Os01g70210.1 |
| DG <sub>o</sub> | Os055024_01 | S6 | -0.976 | 0.000  | P | 829.270  | P | 421.675  | P | 314.357  | 1.399  | LOC_Os04g53310.1 |
| DG <sub>o</sub> | Os055146_01 | S6 | 0.000  | 0.931  | P | 582.353  | P | 364.643  | P | 191.316  | 1.606  | LOC_Os08g39500.1 |
| DG <sub>o</sub> | Os055319_01 | S6 | 1.345  | 0.000  | P | 173.818  | P | 441.662  | P | 478.664  | -1.461 | LOC_Os05g29990.1 |
| DG <sub>o</sub> | Os055340_01 | S6 | 0.000  | 0.988  | P | 824.235  | P | 446.595  | P | 225.130  | 1.872  | -                |
| DG <sub>o</sub> | Os055629_01 | S6 | 1.302  | 0.000  | P | 242.213  | P | 597.131  | P | 780.237  | -1.688 | LOC_Os02g02340.1 |
| DG <sub>o</sub> | Os055646_01 | S6 | 0.000  | 1.210  | P | 492.132  | P | 363.846  | P | 157.294  | 1.646  | LOC_Os12g29670.1 |
| DG <sub>o</sub> | Os056918_02 | S6 | -2.382 | 0.000  | P | 2515.655 | P | 482.528  | P | 277.822  | 3.179  | LOC_Os01g13690.1 |
| DG <sub>o</sub> | Os057161_02 | S6 | -1.167 | 0.000  | P | 970.455  | P | 432.133  | P | 378.251  | 1.359  | LOC_Os03g62170.1 |
| DG <sub>o</sub> | Os057245_02 | S6 | -0.977 | 0.000  | P | 896.953  | P | 455.790  | P | 265.105  | 1.758  | LOC_Os07g48010.1 |
| DG <sub>o</sub> | Os057284_02 | S6 | 0.000  | -0.966 | P | 485.329  | P | 528.944  | P | 1033.513 | -1.091 | LOC_Os07g02800.3 |
| DG <sub>o</sub> | Os057301_02 | S6 | 0.000  | -1.093 | P | 457.420  | P | 594.138  | P | 1267.502 | -1.470 | LOC_Os03g04710.1 |
| DG <sub>o</sub> | Os000445_01 | S5 | 0.000  | -1.632 | P | 707.109  | P | 733.146  | P | 2272.206 | -1.684 | LOC_Os01g37910.1 |
| DG <sub>o</sub> | Os000918_01 | S5 | 0.000  | -2.443 | P | 219.222  | P | 308.890  | P | 1680.033 | -2.938 | LOC_Os11g44960.1 |
| DG <sub>o</sub> | Os001385_01 | S5 | 0.000  | -1.947 | P | 1189.300 | P | 1232.829 | P | 4753.491 | -1.999 | LOC_Os02g05470.1 |
| DG <sub>o</sub> | Os002801_01 | S5 | 1.579  | 0.000  | P | 523.877  | P | 1565.525 | P | 2588.921 | -2.305 | LOC_Os02g57340.1 |
| DG <sub>o</sub> | Os007109_01 | S5 | 1.525  | 0.000  | P | 243.681  | P | 701.051  | P | 924.612  | -1.924 | LOC_Os05g25080.1 |

|                 |             |    |        |        |   |          |   |          |   |          |        |                  |
|-----------------|-------------|----|--------|--------|---|----------|---|----------|---|----------|--------|------------------|
| DG <sub>o</sub> | Os007477_01 | S5 | 1.185  | 0.000  | P | 221.778  | P | 504.306  | P | 869.085  | -1.970 | LOC_Os09g27230.1 |
| DG <sub>o</sub> | Os007500_01 | S5 | 1.385  | 0.000  | P | 228.031  | P | 595.484  | P | 1155.529 | -2.341 | LOC_Os07g41190.1 |
| DG <sub>o</sub> | Os008169_01 | S5 | -1.177 | 0.000  | P | 3841.886 | P | 1699.681 | P | 951.132  | 2.014  | LOC_Os02g40240.2 |
| DG <sub>o</sub> | Os008199_01 | S5 | 0.000  | -3.026 | P | 558.484  | P | 356.629  | P | 2904.364 | -2.379 | LOC_Os11g44990.1 |
| DG <sub>o</sub> | Os008450_01 | S5 | 0.000  | 2.197  | P | 869.995  | P | 1100.703 | P | 240.123  | 1.857  | LOC_Os01g67980.1 |
| DG <sub>o</sub> | Os008602_01 | S5 | 0.000  | 1.902  | P | 1178.847 | P | 1553.034 | P | 415.633  | 1.504  | LOC_Os05g06920.1 |
| DG <sub>o</sub> | Os008644_01 | S5 | 1.578  | 0.000  | P | 354.733  | P | 1059.360 | P | 1605.732 | -2.178 | LOC_Os02g41520.1 |
| DG <sub>o</sub> | Os008851_01 | S5 | 0.000  | 1.236  | P | 2079.491 | P | 1669.590 | P | 708.646  | 1.553  | LOC_Os01g11710.1 |
| DG <sub>o</sub> | Os009003_01 | S5 | 1.433  | 0.000  | P | 404.485  | P | 1092.310 | P | 1470.908 | -1.863 | LOC_Os08g09340.1 |
| DG <sub>o</sub> | Os009082_01 | S5 | 1.412  | 0.000  | P | 231.136  | P | 615.031  | P | 830.745  | -1.846 | LOC_Os04g42430.2 |
| DG <sub>o</sub> | Os009107_01 | S5 | 1.622  | 0.000  | P | 216.685  | P | 666.991  | P | 841.538  | -1.957 | LOC_Os02g50130.1 |
| DG <sub>o</sub> | Os009547_01 | S5 | 0.000  | -2.016 | P | 330.134  | P | 259.806  | P | 1051.139 | -1.671 | LOC_Os01g13570.1 |
| DG <sub>o</sub> | Os009784_01 | S5 | 1.282  | 0.000  | P | 251.193  | P | 610.693  | P | 1031.693 | -2.038 | LOC_Os07g29794.1 |
| DG <sub>o</sub> | Os009787_01 | S5 | 3.389  | 0.000  | P | 448.838  | P | 4702.046 | P | 2721.891 | -2.600 | LOC_Os07g23120.1 |
| DG <sub>o</sub> | Os010141_01 | S5 | 0.000  | -1.234 | P | 318.063  | P | 403.821  | P | 949.877  | -1.578 | -                |
| DG <sub>o</sub> | Os010477_01 | S5 | 0.000  | 1.470  | P | 2039.709 | P | 997.689  | P | 360.172  | 2.502  | -                |
| DG <sub>o</sub> | Os010642_01 | S5 | 0.000  | 1.303  | P | 2296.653 | P | 1961.693 | P | 795.016  | 1.530  | LOC_Os02g32570.1 |
| DG <sub>o</sub> | Os011512_01 | S5 | 2.094  | 0.000  | P | 261.927  | P | 1118.425 | P | 868.133  | -1.729 | LOC_Os07g41370.1 |
| DG <sub>o</sub> | Os011660_01 | S5 | 1.493  | 0.000  | P | 1225.279 | P | 3447.648 | P | 4417.228 | -1.850 | LOC_Os06g45820.1 |
| DG <sub>o</sub> | Os011667_01 | S5 | 0.000  | 1.236  | P | 1834.736 | P | 907.206  | P | 385.072  | 2.252  | LOC_Os01g60430.1 |
| DG <sub>o</sub> | Os011733_01 | S5 | 1.758  | 0.000  | P | 1414.719 | P | 4784.119 | P | 4297.251 | -1.603 | LOC_Os06g51029.1 |
| DG <sub>o</sub> | Os011849_01 | S5 | 0.000  | 2.011  | P | 505.227  | P | 485.088  | P | 120.363  | 2.070  | LOC_Os09g36230.1 |
| DG <sub>o</sub> | Os011915_01 | S5 | 0.000  | -1.141 | P | 921.947  | P | 1224.187 | P | 2699.366 | -1.550 | LOC_Os05g49800.1 |
| DG <sub>o</sub> | Os012417_01 | S5 | 0.000  | -1.658 | P | 250.357  | P | 261.644  | P | 825.813  | -1.722 | LOC_Os04g47360.1 |
| DG <sub>o</sub> | Os012563_01 | S5 | 0.000  | -1.234 | P | 836.702  | P | 1117.782 | P | 2629.447 | -1.652 | LOC_Os12g12850.2 |
| DG <sub>o</sub> | Os012829_01 | S5 | 1.192  | -1.560 | P | 202.432  | P | 462.623  | P | 1364.366 | -2.753 | LOC_Os01g18630.1 |
| DG <sub>o</sub> | Os012841_01 | S5 | 1.922  | 0.000  | P | 276.958  | P | 1049.319 | P | 1293.527 | -2.224 | LOC_Os05g16430.1 |
| DG <sub>o</sub> | Os012870_01 | S5 | 1.489  | 0.000  | P | 258.332  | P | 725.028  | P | 793.571  | -1.619 | LOC_Os03g03670.1 |
| DG <sub>o</sub> | Os012876_01 | S5 | 1.318  | 0.000  | P | 663.491  | P | 1653.729 | P | 1995.497 | -1.589 | LOC_Os05g50550.1 |
| DG <sub>o</sub> | Os012910_01 | S5 | 1.750  | 0.000  | P | 340.312  | P | 1144.547 | P | 1404.248 | -2.045 | LOC_Os12g38170.1 |
| DG <sub>o</sub> | Os012921_01 | S5 | 1.656  | 0.000  | P | 954.789  | P | 3009.029 | P | 2920.771 | -1.613 | LOC_Os04g56240.1 |

|                 |             |    |        |        |   |          |   |          |   |          |        |                  |
|-----------------|-------------|----|--------|--------|---|----------|---|----------|---|----------|--------|------------------|
| DG <sub>o</sub> | Os013145_01 | S5 | 1.823  | 0.000  | P | 339.961  | P | 1202.910 | P | 1067.217 | -1.650 | LOC_Os02g38820.1 |
| DG <sub>o</sub> | Os013325_01 | S5 | 1.208  | 0.000  | P | 157.597  | P | 364.129  | P | 500.545  | -1.667 | LOC_Os08g39860.2 |
| DG <sub>o</sub> | Os013356_01 | S5 | 1.856  | -1.492 | P | 186.933  | P | 676.535  | P | 1903.027 | -3.348 | LOC_Os07g40974.1 |
| DG <sub>o</sub> | Os013426_01 | S5 | 0.000  | -1.173 | P | 376.294  | P | 843.536  | P | 1902.172 | -2.338 | LOC_Os12g35630.1 |
| DG <sub>o</sub> | Os013447_01 | S5 | -1.318 | 1.407  | P | 1848.274 | P | 741.169  | P | 279.587  | 2.725  | LOC_Os02g34600.1 |
| DG <sub>o</sub> | Os013456_01 | S5 | 1.469  | 0.000  | P | 290.381  | P | 804.074  | P | 918.796  | -1.662 | LOC_Os05g38640.1 |
| DG <sub>o</sub> | Os013650_01 | S5 | 1.195  | 0.000  | P | 180.492  | P | 413.265  | P | 807.942  | -2.162 | LOC_Os02g22780.1 |
| DG <sub>o</sub> | Os014192_01 | S5 | 1.426  | 0.000  | P | 419.376  | P | 1126.932 | P | 1342.100 | -1.678 | LOC_Os03g20790.1 |
| DG <sub>o</sub> | Os014285_01 | S5 | 1.216  | 0.000  | P | 467.758  | P | 1086.867 | P | 2223.613 | -2.249 | LOC_Os08g14440.2 |
| DG <sub>o</sub> | Os014320_01 | S5 | 1.726  | 0.000  | P | 357.867  | P | 1184.174 | P | 1554.781 | -2.119 | LOC_Os03g17570.3 |
| DG <sub>o</sub> | Os014364_01 | S5 | 0.000  | -3.668 | P | 574.168  | P | 423.839  | P | 5386.469 | -3.230 | LOC_Os01g45914.1 |
| DG <sub>o</sub> | Os014538_01 | S5 | 1.361  | 0.000  | P | 1496.592 | P | 3842.933 | P | 6820.393 | -2.188 | LOC_Os06g51220.4 |
| DG <sub>o</sub> | Os014730_01 | S5 | -1.076 | 0.000  | P | 873.169  | P | 414.249  | P | 227.776  | 1.939  | LOC_Os01g59350.2 |
| DG <sub>o</sub> | Os014849_01 | S5 | 0.000  | -1.474 | P | 268.163  | P | 286.771  | P | 796.896  | -1.571 | LOC_Os06g04510.1 |
| DG <sub>o</sub> | Os015095_01 | S5 | 0.000  | -2.124 | P | 199.667  | P | 264.165  | P | 1151.335 | -2.528 | LOC_Os01g73450.1 |
| DG <sub>o</sub> | Os015303_01 | S5 | 1.655  | 0.000  | P | 256.634  | P | 808.033  | P | 1285.407 | -2.324 | LOC_Os04g37690.1 |
| DG <sub>o</sub> | Os015378_01 | S5 | 0.000  | 1.626  | P | 449.111  | P | 463.261  | P | 150.121  | 1.581  | LOC_Os12g39970.4 |
| DG <sub>o</sub> | Os015899_01 | S5 | 0.000  | 1.709  | P | 2082.620 | P | 1168.179 | P | 357.229  | 2.543  | LOC_Os12g42610.1 |
| DG <sub>o</sub> | Os015905_01 | S5 | 0.000  | -1.125 | P | 567.032  | P | 873.868  | P | 1905.705 | -1.749 | LOC_Os08g44290.1 |
| DG <sub>o</sub> | Os015957_01 | S5 | 0.000  | 1.344  | P | 726.055  | P | 541.350  | P | 213.292  | 1.767  | LOC_Os05g51780.1 |
| DG <sub>o</sub> | Os016013_01 | S5 | 0.000  | 1.295  | P | 735.587  | P | 626.355  | P | 255.327  | 1.527  | LOC_Os06g09540.1 |
| DG <sub>o</sub> | Os016057_01 | S5 | 0.000  | 1.351  | P | 1287.604 | P | 1083.911 | P | 424.794  | 1.600  | LOC_Os08g43500.1 |
| DG <sub>o</sub> | Os016076_01 | S5 | -1.154 | 1.285  | P | 3598.953 | P | 1616.797 | P | 663.617  | 2.439  | LOC_Os03g01260.1 |
| DG <sub>o</sub> | Os016132_01 | S5 | 1.479  | 0.000  | P | 210.114  | P | 585.859  | P | 1131.380 | -2.429 | LOC_Os04g14190.1 |
| DG <sub>o</sub> | Os016309_01 | S5 | 1.570  | 0.000  | P | 543.461  | P | 1613.731 | P | 1709.066 | -1.653 | LOC_Os10g28360.1 |
| DG <sub>o</sub> | Os016527_01 | S5 | 0.000  | 1.397  | P | 405.911  | P | 349.677  | P | 132.741  | 1.613  | LOC_Os03g60220.1 |
| DG <sub>o</sub> | Os016575_01 | S5 | 0.000  | -1.150 | P | 467.455  | P | 1022.012 | P | 2267.393 | -2.278 | LOC_Os01g40630.1 |
| DG <sub>o</sub> | Os016615_01 | S5 | 0.000  | -2.244 | P | 834.222  | P | 1186.503 | P | 5621.190 | -2.752 | LOC_Os11g05050.2 |
| DG <sub>o</sub> | Os016661_01 | S5 | 1.272  | 0.000  | P | 289.977  | P | 700.196  | P | 992.199  | -1.775 | LOC_Os08g25734.1 |
| DG <sub>o</sub> | Os016921_01 | S5 | 0.000  | -1.358 | P | 167.872  | P | 195.766  | P | 501.765  | -1.580 | LOC_Os07g47290.1 |
| DG <sub>o</sub> | Os017113_01 | S5 | 1.245  | 0.000  | P | 360.280  | P | 854.069  | P | 1175.449 | -1.706 | LOC_Os03g63770.6 |

|                 |             |    |        |        |   |          |   |          |   |           |        |                  |
|-----------------|-------------|----|--------|--------|---|----------|---|----------|---|-----------|--------|------------------|
| DG <sub>o</sub> | Os017115_01 | S5 | 1.278  | 0.000  | P | 559.488  | P | 1356.415 | P | 1920.215  | -1.779 | LOC_Os12g42550.1 |
| DG <sub>o</sub> | Os017277_01 | S5 | -1.273 | 1.572  | P | 2303.234 | P | 952.797  | P | 320.541   | 2.845  | LOC_Os01g66510.1 |
| DG <sub>o</sub> | Os017305_01 | S5 | -1.598 | 1.872  | P | 2814.602 | P | 929.550  | P | 253.864   | 3.471  | -                |
| DG <sub>o</sub> | Os017708_01 | S5 | 1.252  | 0.000  | P | 144.993  | P | 345.414  | P | 483.338   | -1.737 | -                |
| DG <sub>o</sub> | Os017944_01 | S5 | 0.000  | -1.967 | P | 1843.577 | P | 2088.748 | P | 8168.542  | -2.148 | LOC_Os04g18090.1 |
| DG <sub>o</sub> | Os018138_01 | S5 | 1.614  | 0.000  | P | 157.816  | P | 482.909  | P | 625.824   | -1.988 | LOC_Os10g36000.2 |
| DG <sub>o</sub> | Os018221_01 | S5 | 0.000  | -2.574 | P | 307.140  | P | 155.719  | P | 927.178   | -1.594 | -                |
| DG <sub>o</sub> | Os018397_01 | S5 | 0.000  | -2.122 | P | 142.125  | P | 156.181  | P | 679.924   | -2.258 | LOC_Os08g04450.4 |
| DG <sub>o</sub> | Os018515_01 | S5 | 0.000  | -1.194 | P | 534.648  | P | 696.285  | P | 1593.123  | -1.575 | LOC_Os02g43500.2 |
| DG <sub>o</sub> | Os018541_01 | S5 | 0.000  | -1.431 | P | 475.239  | P | 583.875  | P | 1573.826  | -1.728 | LOC_Os06g43660.1 |
| DG <sub>o</sub> | Os018714_01 | S5 | 0.000  | -1.427 | P | 257.122  | P | 278.108  | P | 747.575   | -1.540 | LOC_Os01g53020.1 |
| DG <sub>o</sub> | Os018804_01 | S5 | 0.000  | 1.561  | P | 722.143  | P | 434.253  | P | 147.164   | 2.295  | LOC_Os04g40520.1 |
| DG <sub>o</sub> | Os018929_01 | S5 | 0.000  | -1.375 | P | 235.402  | P | 402.742  | P | 1044.417  | -2.149 | LOC_Os01g09540.1 |
| DG <sub>o</sub> | Os018940_01 | S5 | 0.000  | 1.520  | P | 1193.468 | P | 844.884  | P | 294.550   | 2.019  | LOC_Os06g49700.2 |
| DG <sub>o</sub> | Os018960_01 | S5 | 1.563  | 0.000  | P | 2970.030 | P | 8774.923 | P | 12830.056 | -2.111 | LOC_Os03g52840.1 |
| DG <sub>o</sub> | Os019026_01 | S5 | 0.000  | 2.183  | P | 1093.322 | P | 658.356  | P | 144.999   | 2.915  | -                |
| DG <sub>o</sub> | Os019258_01 | S5 | 0.000  | 2.649  | P | 1424.743 | P | 1127.643 | P | 179.785   | 2.986  | LOC_Os03g46190.2 |
| DG <sub>o</sub> | Os019287_01 | S5 | 0.000  | -1.881 | P | 269.977  | P | 363.239  | P | 1337.977  | -2.309 | LOC_Os01g65080.3 |
| DG <sub>o</sub> | Os019597_01 | S5 | 0.000  | -2.234 | P | 262.492  | P | 179.021  | P | 842.297   | -1.682 | LOC_Os11g10520.1 |
| DG <sub>o</sub> | Os019607_01 | S5 | 0.000  | -1.847 | P | 172.358  | P | 170.567  | P | 613.592   | -1.832 | LOC_Os03g53670.1 |
| DG <sub>o</sub> | Os019825_01 | S5 | 1.491  | 0.000  | P | 480.148  | P | 1349.334 | P | 1631.305  | -1.764 | LOC_Os05g34070.1 |
| DG <sub>o</sub> | Os020137_01 | S5 | 1.201  | 0.000  | P | 318.510  | P | 732.385  | P | 1077.991  | -1.759 | LOC_Os06g41670.1 |
| DG <sub>o</sub> | Os020633_01 | S5 | 0.000  | -1.188 | P | 195.295  | P | 274.580  | P | 625.745   | -1.680 | LOC_Os09g30120.1 |
| DG <sub>o</sub> | Os020969_01 | S5 | -1.159 | 0.000  | P | 1611.947 | P | 722.117  | P | 386.560   | 2.060  | LOC_Os08g08800.1 |
| DG <sub>o</sub> | Os021180_01 | S5 | 2.016  | 0.000  | P | 101.370  | P | 409.930  | P | 305.752   | -1.593 | LOC_Os01g65410.1 |
| DG <sub>o</sub> | Os021391_01 | S5 | 1.336  | 0.000  | P | 688.988  | P | 1739.399 | P | 2014.911  | -1.548 | LOC_Os03g12670.2 |
| DG <sub>o</sub> | Os021489_01 | S5 | -1.266 | 0.000  | P | 1100.187 | P | 457.401  | P | 296.598   | 1.891  | LOC_Os09g36990.1 |
| DG <sub>o</sub> | Os021841_01 | S5 | -1.417 | 0.000  | P | 2577.757 | P | 965.290  | P | 521.262   | 2.306  | LOC_Os08g36410.1 |
| DG <sub>o</sub> | Os021870_01 | S5 | 0.000  | -1.785 | P | 128.790  | P | 251.443  | P | 866.334   | -2.750 | LOC_Os07g41060.1 |
| DG <sub>o</sub> | Os021978_01 | S5 | 1.310  | 0.000  | P | 978.995  | P | 2427.421 | P | 3295.495  | -1.751 | LOC_Os02g39160.1 |
| DG <sub>o</sub> | Os022240_01 | S5 | 0.000  | -1.351 | P | 939.735  | P | 1522.834 | P | 3884.913  | -2.048 | LOC_Os05g13620.1 |

|                 |             |    |        |        |   |           |   |           |   |          |        |                  |
|-----------------|-------------|----|--------|--------|---|-----------|---|-----------|---|----------|--------|------------------|
| DG <sub>0</sub> | Os022309_01 | S5 | 1.579  | 0.000  | P | 337.711   | P | 1009.118  | P | 1132.053 | -1.745 | LOC_Os05g10670.1 |
| DG <sub>0</sub> | Os022480_01 | S5 | 0.000  | 1.561  | P | 515.808   | P | 323.409   | P | 109.643  | 2.234  | LOC_Os01g18220.1 |
| DG <sub>0</sub> | Os023050_01 | S5 | 0.000  | 1.658  | P | 538.223   | P | 568.556   | P | 180.156  | 1.579  | LOC_Os06g02330.1 |
| DG <sub>0</sub> | Os023497_01 | S5 | -1.939 | 0.000  | P | 721.248   | P | 188.145   | P | 174.756  | 2.045  | -                |
| DG <sub>0</sub> | Os023615_01 | S5 | 1.696  | 0.000  | P | 168.403   | P | 545.604   | P | 1039.256 | -2.626 | -                |
| DG <sub>0</sub> | Os023737_01 | S5 | 0.000  | 1.482  | P | 1569.171  | P | 779.228   | P | 278.951  | 2.492  | -                |
| DG <sub>0</sub> | Os023923_01 | S5 | 0.000  | 1.230  | P | 1209.545  | P | 652.352   | P | 278.107  | 2.121  | LOC_Os07g18780.1 |
| DG <sub>0</sub> | Os024100_01 | S5 | 1.372  | -1.091 | P | 142.444   | P | 368.776   | P | 785.472  | -2.463 | LOC_Os05g03750.1 |
| DG <sub>0</sub> | Os024190_01 | S5 | 0.000  | -1.059 | P | 366.402   | P | 606.354   | P | 1263.307 | -1.786 | LOC_Os01g20160.1 |
| DG <sub>0</sub> | Os024221_01 | S5 | 0.000  | 1.768  | P | 1414.447  | P | 899.180   | P | 264.029  | 2.421  | -                |
| DG <sub>0</sub> | Os024669_01 | S5 | -1.373 | 2.683  | P | 3280.055  | P | 1265.972  | P | 197.163  | 4.056  | LOC_Os07g03170.1 |
| DG <sub>0</sub> | Os024723_01 | S5 | -1.254 | 0.000  | P | 845.361   | P | 354.524   | P | 212.849  | 1.990  | LOC_Os11g05490.1 |
| DG <sub>0</sub> | Os024798_01 | S5 | 1.250  | 0.000  | P | 224.784   | P | 534.780   | P | 654.257  | -1.541 | LOC_Os05g48800.2 |
| DG <sub>0</sub> | Os024919_01 | S5 | 0.000  | 1.514  | P | 1718.186  | P | 1188.550  | P | 416.153  | 2.046  | -                |
| DG <sub>0</sub> | Os028605_01 | S5 | -1.245 | 0.000  | P | 1912.992  | P | 807.023   | P | 547.593  | 1.805  | LOC_Os02g06380.1 |
| DG <sub>0</sub> | Os028680_01 | S5 | 2.012  | 0.000  | P | 198.308   | P | 800.081   | P | 1510.062 | -2.929 | LOC_Os07g06100.1 |
| DG <sub>0</sub> | Os028785_01 | S5 | 0.000  | 1.317  | P | 31823.651 | P | 21200.934 | P | 8508.819 | 1.903  | LOC_Os02g38450.1 |
| DG <sub>0</sub> | Os028876_01 | S5 | 1.300  | 0.000  | P | 412.653   | P | 1016.100  | P | 1399.247 | -1.762 | LOC_Os07g40950.1 |
| DG <sub>0</sub> | Os029713_01 | S5 | 0.000  | 1.687  | P | 3959.518  | P | 1962.690  | P | 609.413  | 2.700  | LOC_Os07g30990.1 |
| DG <sub>0</sub> | Os030028_01 | S5 | 1.196  | 0.000  | P | 323.428   | P | 740.940   | P | 1504.726 | -2.218 | LOC_Os01g02710.1 |
| DG <sub>0</sub> | Os030032_01 | S5 | 0.000  | -1.194 | P | 177.921   | P | 247.040   | P | 565.226  | -1.668 | LOC_Os06g48560.1 |
| DG <sub>0</sub> | Os031550_01 | S5 | 1.528  | 0.000  | P | 268.232   | P | 773.544   | P | 942.119  | -1.812 | LOC_Os04g10924.1 |
| DG <sub>0</sub> | Os032688_01 | S5 | 2.008  | 0.000  | P | 180.626   | P | 726.505   | P | 1121.058 | -2.634 | LOC_Os07g26500.1 |
| DG <sub>0</sub> | Os032700_01 | S5 | 1.742  | 0.000  | P | 343.706   | P | 1149.688  | P | 1972.215 | -2.521 | LOC_Os10g09900.1 |
| DG <sub>0</sub> | Os032943_01 | S5 | 1.252  | 0.000  | P | 229.459   | P | 546.359   | P | 788.142  | -1.780 | LOC_Os11g24180.1 |
| DG <sub>0</sub> | Os032955_01 | S5 | 1.404  | 0.000  | P | 181.957   | P | 481.567   | P | 606.403  | -1.737 | LOC_Os06g28490.1 |
| DG <sub>0</sub> | Os033341_01 | S5 | 1.690  | 0.000  | P | 448.925   | P | 1448.138  | P | 1982.038 | -2.142 | LOC_Os02g34070.1 |
| DG <sub>0</sub> | Os033536_01 | S5 | 0.000  | 1.252  | P | 1115.326  | P | 780.230   | P | 327.540  | 1.768  | LOC_Os02g13050.1 |
| DG <sub>0</sub> | Os034119_01 | S5 | 1.418  | 0.000  | P | 294.623   | P | 787.228   | P | 1270.285 | -2.108 | LOC_Os04g08080.1 |
| DG <sub>0</sub> | Os034125_01 | S5 | 1.266  | 0.000  | P | 351.456   | P | 845.212   | P | 1388.119 | -1.982 | LOC_Os03g08570.1 |
| DG <sub>0</sub> | Os034439_01 | S5 | 1.872  | 0.000  | P | 998.565   | P | 3653.890  | P | 6758.654 | -2.759 | LOC_Os03g32570.1 |

|                 |             |    |        |        |   |           |   |           |   |           |        |                  |
|-----------------|-------------|----|--------|--------|---|-----------|---|-----------|---|-----------|--------|------------------|
| DG <sub>o</sub> | Os034475_01 | S5 | 1.548  | 0.000  | P | 1008.392  | P | 2948.839  | P | 3967.039  | -1.976 | LOC_Os08g35310.1 |
| DG <sub>o</sub> | Os034849_01 | S5 | 1.222  | 0.000  | P | 621.741   | P | 1450.441  | P | 2294.948  | -1.884 | LOC_Os09g25010.1 |
| DG <sub>o</sub> | Os034986_01 | S5 | 1.313  | 0.000  | P | 874.792   | P | 2172.830  | P | 3389.930  | -1.954 | -                |
| DG <sub>o</sub> | Os035023_01 | S5 | 0.000  | 1.376  | P | 2002.856  | P | 1351.694  | P | 520.873   | 1.943  | -                |
| DG <sub>o</sub> | Os036001_01 | S5 | 1.355  | 0.000  | P | 433.824   | P | 1109.438  | P | 1668.062  | -1.943 | LOC_Os11g19070.1 |
| DG <sub>o</sub> | Os036737_01 | S5 | 1.556  | 0.000  | P | 291.454   | P | 856.699   | P | 1397.957  | -2.262 | LOC_Os01g18370.1 |
| DG <sub>o</sub> | Os037264_01 | S5 | 0.000  | 1.426  | P | 1205.909  | P | 1056.401  | P | 393.107   | 1.617  | LOC_Os01g11620.1 |
| DG <sub>o</sub> | Os039580_01 | S5 | -1.573 | 1.415  | P | 963.911   | P | 324.032   | P | 121.479   | 2.988  | LOC_Os02g40180.1 |
| DG <sub>o</sub> | Os040491_01 | S5 | 0.000  | 1.587  | P | 3555.309  | P | 2891.130  | P | 962.152   | 1.886  | LOC_Os01g52910.1 |
| DG <sub>o</sub> | Os041201_01 | S5 | -1.469 | 0.000  | P | 1701.576  | P | 614.802   | P | 306.409   | 2.473  | LOC_Os03g53030.1 |
| DG <sub>o</sub> | Os041241_01 | S5 | -1.184 | 2.027  | P | 2841.481  | P | 1250.385  | P | 306.785   | 3.211  | LOC_Os01g21270.1 |
| DG <sub>o</sub> | Os041337_01 | S5 | 0.000  | 1.314  | P | 779.691   | P | 421.652   | P | 169.551   | 2.201  | LOC_Os04g05490.1 |
| DG <sub>o</sub> | Os041663_01 | S5 | -1.106 | 1.495  | P | 3752.584  | P | 1742.818  | P | 618.270   | 2.602  | LOC_Os01g70080.1 |
| DG <sub>o</sub> | Os042013_01 | S5 | 1.208  | 0.000  | P | 5460.482  | P | 12614.492 | P | 19425.622 | -1.831 | LOC_Os08g19330.1 |
| DG <sub>o</sub> | Os042866_01 | S5 | 0.000  | 1.347  | P | 668.045   | P | 467.413   | P | 183.731   | 1.862  | LOC_Os10g05820.1 |
| DG <sub>o</sub> | Os042879_01 | S5 | -1.080 | 1.316  | P | 1027.260  | P | 486.063   | P | 195.269   | 2.395  | -                |
| DG <sub>o</sub> | Os044144_01 | S5 | 0.000  | 1.510  | P | 962.063   | P | 603.238   | P | 211.802   | 2.183  | LOC_Os07g12700.1 |
| DG <sub>o</sub> | Os044170_01 | S5 | -1.260 | 0.000  | P | 1357.091  | P | 566.625   | P | 263.324   | 2.366  | LOC_Os01g40200.1 |
| DG <sub>o</sub> | Os044300_01 | S5 | 0.000  | 1.858  | P | 17689.327 | P | 13064.532 | P | 3603.851  | 2.295  | LOC_Os05g11320.1 |
| DG <sub>o</sub> | Os044617_01 | S5 | 1.964  | 0.000  | P | 865.918   | P | 3378.836  | P | 6184.661  | -2.836 | -                |
| DG <sub>o</sub> | Os044685_01 | S5 | 0.000  | 1.813  | P | 1152.282  | P | 660.960   | P | 188.145   | 2.615  | LOC_Os11g20600.1 |
| DG <sub>o</sub> | Os045034_01 | S5 | -1.176 | 1.327  | P | 999.808   | P | 442.462   | P | 176.343   | 2.503  | LOC_Os10g28160.1 |
| DG <sub>o</sub> | Os045117_01 | S5 | -1.310 | 0.000  | P | 3221.344  | P | 1299.365  | P | 563.177   | 2.516  | LOC_Os06g06310.1 |
| DG <sub>o</sub> | Os045364_01 | S5 | -1.083 | 0.000  | P | 616.086   | P | 290.746   | P | 216.421   | 1.509  | LOC_Os09g01860.1 |
| DG <sub>o</sub> | Os045434_01 | S5 | 1.493  | 0.000  | P | 186.307   | P | 524.469   | P | 652.264   | -1.808 | LOC_Os05g23210.1 |
| DG <sub>o</sub> | Os045565_01 | S5 | 2.416  | -1.333 | P | 141.545   | P | 755.608   | P | 1903.885  | -3.750 | LOC_Os10g09630.1 |
| DG <sub>o</sub> | Os046160_01 | S5 | -1.236 | 0.000  | P | 1117.104  | P | 474.417   | P | 293.964   | 1.926  | LOC_Os07g32440.1 |
| DG <sub>o</sub> | Os046207_01 | S5 | -1.177 | 2.442  | P | 2122.686  | P | 938.604   | P | 172.784   | 3.619  | LOC_Os02g12540.1 |
| DG <sub>o</sub> | Os046633_01 | S5 | 0.000  | 1.847  | P | 1701.015  | P | 1342.336  | P | 373.220   | 2.188  | -                |
| DG <sub>o</sub> | Os047672_01 | S5 | 0.000  | 1.250  | P | 685.844   | P | 550.530   | P | 231.459   | 1.567  | LOC_Os05g09720.1 |
| DG <sub>o</sub> | Os047994_01 | S5 | 1.317  | 0.000  | P | 190.805   | P | 475.480   | P | 617.998   | -1.696 | LOC_Os06g44690.1 |



|                 |             |    |        |        |   |          |   |          |   |          |        |                  |
|-----------------|-------------|----|--------|--------|---|----------|---|----------|---|----------|--------|------------------|
| DG <sub>o</sub> | Os048651_01 | S5 | 0.000  | 1.881  | P | 788.649  | P | 449.015  | P | 121.910  | 2.694  | LOC_Os10g28724.1 |
| DG <sub>o</sub> | Os048874_01 | S5 | 1.837  | 0.000  | P | 337.987  | P | 1207.370 | P | 1067.787 | -1.660 | LOC_Os05g51930.1 |
| DG <sub>o</sub> | Os049215_01 | S5 | 0.000  | 1.508  | P | 1636.884 | P | 1107.547 | P | 389.474  | 2.071  | LOC_Os08g31550.1 |
| DG <sub>o</sub> | Os049435_01 | S5 | 0.000  | 2.226  | P | 1408.459 | P | 893.190  | P | 190.897  | 2.883  | -                |
| DG <sub>o</sub> | Os050200_01 | S5 | 0.000  | 1.382  | P | 1207.389 | P | 1016.671 | P | 390.170  | 1.630  | LOC_Os07g34640.2 |
| DG <sub>o</sub> | Os050398_01 | S5 | 1.293  | 0.000  | P | 194.175  | P | 475.835  | P | 607.832  | -1.646 | LOC_Os11g12060.1 |
| DG <sub>o</sub> | Os050873_01 | S5 | -1.080 | 0.000  | P | 3089.722 | P | 1461.887 | P | 810.754  | 1.930  | -                |
| DG <sub>o</sub> | Os051250_01 | S5 | 0.000  | 1.584  | P | 3436.056 | P | 2894.178 | P | 965.262  | 1.832  | -                |
| DG <sub>o</sub> | Os051737_01 | S5 | -1.159 | 0.000  | P | 2126.526 | P | 952.182  | P | 512.064  | 2.054  | LOC_Os06g26050.1 |
| DG <sub>o</sub> | Os051935_01 | S5 | 2.163  | 0.000  | P | 615.053  | P | 2754.164 | P | 2118.627 | -1.784 | LOC_Os01g15270.1 |
| DG <sub>o</sub> | Os051948_01 | S5 | 0.000  | -2.070 | P | 898.065  | P | 1606.427 | P | 6743.778 | -2.909 | LOC_Os11g06720.1 |
| DG <sub>o</sub> | Os052028_01 | S5 | 0.000  | -1.119 | P | 2685.366 | P | 4570.123 | P | 9928.958 | -1.887 | LOC_Os12g23200.1 |
| DG <sub>o</sub> | Os052059_01 | S5 | 1.261  | -1.257 | P | 392.187  | P | 940.122  | P | 2246.849 | -2.518 | LOC_Os09g26420.3 |
| DG <sub>o</sub> | Os052093_01 | S5 | 0.000  | -1.370 | P | 836.660  | P | 1657.315 | P | 4282.394 | -2.356 | LOC_Os02g38210.1 |
| DG <sub>o</sub> | Os052118_01 | S5 | 0.000  | -2.360 | P | 868.005  | P | 855.511  | P | 4392.072 | -2.339 | LOC_Os10g18340.1 |
| DG <sub>o</sub> | Os052122_01 | S5 | 1.498  | 0.000  | P | 376.713  | P | 1063.958 | P | 1297.290 | -1.784 | LOC_Os02g04160.1 |
| DG <sub>o</sub> | Os052184_01 | S5 | 0.000  | -1.136 | P | 827.691  | P | 1125.421 | P | 2474.039 | -1.580 | LOC_Os06g08080.1 |
| DG <sub>o</sub> | Os052201_01 | S5 | -1.184 | 1.711  | P | 1619.826 | P | 712.961  | P | 217.806  | 2.895  | LOC_Os07g46500.2 |
| DG <sub>o</sub> | Os052465_01 | S5 | 1.521  | 0.000  | P | 193.030  | P | 553.829  | P | 573.226  | -1.570 | -                |
| DG <sub>o</sub> | Os052644_01 | S5 | 0.000  | 1.667  | P | 969.770  | P | 815.533  | P | 256.904  | 1.916  | LOC_Os01g37590.1 |
| DG <sub>o</sub> | Os052870_01 | S5 | 1.391  | 0.000  | P | 236.481  | P | 620.263  | P | 699.111  | -1.564 | LOC_Os01g21820.1 |
| DG <sub>o</sub> | Os053101_01 | S5 | 0.000  | 1.816  | P | 843.537  | P | 526.149  | P | 149.442  | 2.497  | LOC_Os03g62210.1 |
| DG <sub>o</sub> | Os053247_01 | S5 | 0.000  | -1.408 | P | 152.359  | P | 215.928  | P | 572.990  | -1.911 | LOC_Os10g40830.1 |
| DG <sub>o</sub> | Os053987_01 | S5 | 0.000  | -1.706 | P | 270.981  | P | 280.435  | P | 914.872  | -1.755 | LOC_Os01g65190.1 |
| DG <sub>o</sub> | Os054121_01 | S5 | 1.493  | 0.000  | P | 210.903  | P | 593.447  | P | 696.864  | -1.724 | LOC_Os09g10700.1 |
| DG <sub>o</sub> | Os054446_01 | S5 | 1.552  | 0.000  | P | 1741.734 | P | 5107.354 | P | 5717.622 | -1.715 | LOC_Os07g01760.1 |
| DG <sub>o</sub> | Os054448_01 | S5 | 0.000  | -1.256 | P | 237.919  | P | 330.926  | P | 790.266  | -1.732 | LOC_Os06g48750.2 |
| DG <sub>o</sub> | Os054450_01 | S5 | 0.000  | -1.170 | P | 492.335  | P | 811.431  | P | 1825.452 | -1.891 | LOC_Os04g57220.3 |
| DG <sub>o</sub> | Os054458_01 | S5 | 0.000  | -1.283 | P | 601.530  | P | 754.533  | P | 1836.295 | -1.610 | LOC_Os12g05050.1 |
| DG <sub>o</sub> | Os054509_01 | S5 | 1.261  | 0.000  | P | 2928.737 | P | 7021.245 | P | 8701.674 | -1.571 | LOC_Os02g47020.1 |
| DG <sub>o</sub> | Os054516_01 | S5 | 1.312  | 0.000  | P | 235.868  | P | 585.546  | P | 752.511  | -1.674 | LOC_Os11g14920.1 |

|                 |             |    |        |        |   |          |   |           |   |           |        |                  |
|-----------------|-------------|----|--------|--------|---|----------|---|-----------|---|-----------|--------|------------------|
| DG <sub>0</sub> | Os054578_01 | S5 | 1.323  | 0.000  | P | 315.996  | P | 790.568   | P | 1271.839  | -2.009 | LOC_Os02g39630.2 |
| DG <sub>0</sub> | Os054743_01 | S5 | 1.658  | 0.000  | P | 159.736  | P | 503.969   | P | 513.253   | -1.684 | LOC_Os01g64970.1 |
| DG <sub>0</sub> | Os054779_01 | S5 | 0.000  | -1.208 | P | 382.996  | P | 697.908   | P | 1612.455  | -2.074 | LOC_Os01g13770.1 |
| DG <sub>0</sub> | Os054826_01 | S5 | 1.843  | 0.000  | P | 227.116  | P | 814.830   | P | 739.046   | -1.702 | LOC_Os01g70210.1 |
| DG <sub>0</sub> | Os054984_01 | S5 | 1.254  | 0.000  | P | 282.168  | P | 673.010   | P | 945.191   | -1.744 | LOC_Os05g51450.1 |
| DG <sub>0</sub> | Os055222_01 | S5 | 1.309  | 0.000  | P | 147.839  | P | 366.199   | P | 622.588   | -2.074 | LOC_Os01g59060.1 |
| DG <sub>0</sub> | Os055308_01 | S5 | 0.000  | 1.312  | P | 492.113  | P | 382.762   | P | 154.174   | 1.674  | LOC_Os07g48020.1 |
| DG <sub>0</sub> | Os055352_01 | S5 | 0.000  | 1.264  | P | 1791.365 | P | 1212.926  | P | 505.096   | 1.826  | -                |
| DG <sub>0</sub> | Os055529_01 | S5 | 1.370  | 0.000  | P | 590.578  | P | 1526.158  | P | 1719.317  | -1.542 | LOC_Os04g56230.1 |
| DG <sub>0</sub> | Os055703_01 | S5 | 0.000  | -1.285 | P | 343.760  | P | 418.695   | P | 1020.445  | -1.570 | LOC_Os01g31680.1 |
| DG <sub>0</sub> | Os056446_01 | S5 | 0.000  | -1.841 | P | 155.003  | P | 292.045   | P | 1046.030  | -2.755 | LOC_Os01g74160.1 |
| DG <sub>0</sub> | Os056918_02 | S5 | 0.000  | 2.472  | P | 4233.063 | P | 3715.749  | P | 669.686   | 2.660  | LOC_Os01g13690.1 |
| DG <sub>0</sub> | Os056934_02 | S5 | 0.000  | -1.217 | P | 440.134  | P | 600.759   | P | 1396.917  | -1.666 | -                |
| DG <sub>0</sub> | Os057238_02 | S5 | 0.000  | -1.571 | P | 261.907  | P | 261.680   | P | 777.270   | -1.569 | LOC_Os01g65350.1 |
| DG <sub>0</sub> | Os057254_02 | S5 | 0.000  | -1.250 | P | 9476.819 | P | 16128.246 | P | 38362.689 | -2.017 | -                |
| DG <sub>0</sub> | Os057275_02 | S5 | 1.388  | 0.000  | P | 428.356  | P | 1121.100  | P | 1925.411  | -2.168 | -                |
| DG <sub>0</sub> | Os057286_02 | S5 | 1.811  | 0.000  | P | 965.292  | P | 3386.905  | P | 2812.779  | -1.543 | LOC_Os01g43150.1 |
| DG <sub>0</sub> | Os000271_01 | S4 | 1.671  | 0.000  | P | 264.202  | P | 841.068   | P | 966.739   | -1.871 | LOC_Os02g22100.7 |
| DG <sub>0</sub> | Os000322_01 | S4 | 1.586  | 0.000  | P | 449.951  | P | 1351.268  | P | 2065.001  | -2.198 | LOC_Os07g28610.2 |
| DG <sub>0</sub> | Os000440_01 | S4 | -2.796 | 0.000  | P | 3553.177 | P | 511.441   | P | 883.197   | 2.008  | LOC_Os04g52090.1 |
| DG <sub>0</sub> | Os000918_01 | S4 | 0.000  | -1.846 | P | 192.203  | P | 397.132   | P | 1427.755  | -2.893 | LOC_Os11g44960.1 |
| DG <sub>0</sub> | Os000954_01 | S4 | -1.206 | 0.000  | P | 843.678  | P | 365.801   | P | 233.669   | 1.852  | LOC_Os02g39350.1 |
| DG <sub>0</sub> | Os001428_01 | S4 | 0.000  | -1.374 | P | 195.773  | P | 253.165   | P | 655.997   | -1.745 | LOC_Os11g33320.1 |
| DG <sub>0</sub> | Os001786_01 | S4 | -1.869 | 0.000  | P | 746.116  | P | 204.208   | P | 123.719   | 2.592  | LOC_Os02g09980.1 |
| DG <sub>0</sub> | Os001903_01 | S4 | 0.000  | 2.444  | P | 1116.143 | P | 1121.143  | P | 205.973   | 2.438  | LOC_Os01g68290.1 |
| DG <sub>0</sub> | Os001934_01 | S4 | 2.335  | 0.000  | P | 128.519  | P | 648.454   | P | 1200.048  | -3.223 | -                |
| DG <sub>0</sub> | Os002299_01 | S4 | 0.000  | -1.500 | P | 190.393  | P | 281.009   | P | 794.922   | -2.062 | LOC_Os01g50830.1 |
| DG <sub>0</sub> | Os002353_01 | S4 | 0.000  | 2.459  | P | 1262.639 | P | 1366.877  | P | 248.601   | 2.345  | LOC_Os03g38470.1 |
| DG <sub>0</sub> | Os002671_01 | S4 | 0.000  | -2.012 | P | 245.289  | P | 217.910   | P | 878.628   | -1.841 | LOC_Os03g51440.1 |
| DG <sub>0</sub> | Os002952_01 | S4 | 1.652  | 0.000  | P | 132.110  | P | 415.265   | P | 649.721   | -2.298 | LOC_Os10g10750.1 |
| DG <sub>0</sub> | Os003566_01 | S4 | 0.000  | 1.727  | P | 595.802  | P | 415.484   | P | 125.541   | 2.247  | -                |

|                 |             |    |        |        |   |          |   |           |   |           |        |                  |
|-----------------|-------------|----|--------|--------|---|----------|---|-----------|---|-----------|--------|------------------|
| DG <sub>o</sub> | Os004399_01 | S4 | -1.249 | 1.553  | P | 2905.520 | P | 1222.823  | P | 416.601   | 2.802  | LOC_Os02g40180.1 |
| DG <sub>o</sub> | Os008199_01 | S4 | 0.000  | -2.842 | P | 135.625  | P | 268.463   | P | 1925.403  | -3.827 | LOC_Os11g44990.1 |
| DG <sub>o</sub> | Os008441_01 | S4 | -1.170 | 0.000  | P | 1357.710 | P | 603.348   | P | 383.213   | 1.825  | LOC_Os03g49190.1 |
| DG <sub>o</sub> | Os008450_01 | S4 | 0.000  | 2.260  | P | 4049.994 | P | 2243.962  | P | 468.422   | 3.112  | LOC_Os01g67980.1 |
| DG <sub>o</sub> | Os008614_01 | S4 | 0.000  | 1.432  | P | 640.154  | P | 442.178   | P | 163.890   | 1.966  | LOC_Os05g49160.2 |
| DG <sub>o</sub> | Os008896_01 | S4 | 0.000  | -1.691 | P | 233.492  | P | 242.524   | P | 783.088   | -1.746 | LOC_Os04g51520.1 |
| DG <sub>o</sub> | Os009163_01 | S4 | 0.000  | 1.666  | P | 395.405  | P | 350.229   | P | 110.356   | 1.841  | LOC_Os02g05830.1 |
| DG <sub>o</sub> | Os009287_01 | S4 | 2.207  | 0.000  | P | 508.694  | P | 2348.417  | P | 3948.679  | -2.956 | LOC_Os01g16660.1 |
| DG <sub>o</sub> | Os009787_01 | S4 | 0.000  | -1.680 | P | 270.966  | P | 643.513   | P | 2061.516  | -2.928 | LOC_Os07g23120.1 |
| DG <sub>o</sub> | Os009921_01 | S4 | 0.000  | 2.617  | P | 1159.682 | P | 1341.565  | P | 218.629   | 2.407  | LOC_Os02g50620.1 |
| DG <sub>o</sub> | Os009929_01 | S4 | 1.737  | 0.000  | P | 160.898  | P | 536.196   | P | 725.521   | -2.173 | LOC_Os02g31860.1 |
| DG <sub>o</sub> | Os009934_01 | S4 | 2.353  | 0.000  | P | 242.306  | P | 1238.084  | P | 902.843   | -1.898 | LOC_Os01g49230.1 |
| DG <sub>o</sub> | Os009935_01 | S4 | 1.600  | 0.000  | P | 2288.657 | P | 6935.692  | P | 13354.758 | -2.545 | LOC_Os04g52060.1 |
| DG <sub>o</sub> | Os009937_01 | S4 | 1.440  | 0.000  | P | 185.678  | P | 503.796   | P | 627.580   | -1.757 | LOC_Os05g34260.1 |
| DG <sub>o</sub> | Os009964_01 | S4 | 3.088  | 0.000  | P | 159.270  | P | 1354.195  | P | 2643.818  | -4.053 | LOC_Os09g20880.1 |
| DG <sub>o</sub> | Os009971_01 | S4 | 7.123  | -1.161 | P | 169.436  | P | 23616.728 | P | 52811.056 | -8.284 | LOC_Os03g05330.1 |
| DG <sub>o</sub> | Os010001_01 | S4 | 3.000  | 0.000  | P | 332.192  | P | 2657.336  | P | 2455.062  | -2.886 | LOC_Os08g02200.1 |
| DG <sub>o</sub> | Os010125_01 | S4 | 2.896  | 0.000  | P | 160.836  | P | 1196.822  | P | 1432.069  | -3.154 | LOC_Os07g06600.1 |
| DG <sub>o</sub> | Os010130_01 | S4 | 0.000  | 1.466  | P | 478.083  | P | 370.564   | P | 134.098   | 1.834  | LOC_Os02g13960.1 |
| DG <sub>o</sub> | Os010148_01 | S4 | 7.126  | 0.000  | P | 136.040  | P | 19001.727 | P | 38480.253 | -8.144 | -                |
| DG <sub>o</sub> | Os010152_01 | S4 | 2.024  | 0.000  | P | 116.616  | P | 474.153   | P | 634.634   | -2.444 | -                |
| DG <sub>o</sub> | Os010171_01 | S4 | -2.098 | 0.000  | P | 1401.721 | P | 327.435   | P | 252.138   | 2.475  | -                |
| DG <sub>o</sub> | Os010179_01 | S4 | 1.567  | 0.000  | P | 119.337  | P | 353.476   | P | 434.030   | -1.863 | LOC_Os09g30410.1 |
| DG <sub>o</sub> | Os010193_01 | S4 | 0.000  | 2.462  | P | 944.975  | P | 1429.772  | P | 259.437   | 1.865  | LOC_Os12g34010.1 |
| DG <sub>o</sub> | Os010211_01 | S4 | 2.152  | 0.000  | P | 182.198  | P | 809.936   | P | 1315.856  | -2.852 | LOC_Os10g41800.1 |
| DG <sub>o</sub> | Os010217_01 | S4 | 3.993  | 0.000  | P | 109.284  | P | 1740.432  | P | 2503.831  | -4.518 | LOC_Os08g06540.1 |
| DG <sub>o</sub> | Os010244_01 | S4 | 7.299  | 0.000  | P | 137.544  | P | 21652.658 | P | 47323.171 | -8.427 | -                |
| DG <sub>o</sub> | Os010260_01 | S4 | 2.956  | 0.000  | P | 138.728  | P | 1076.856  | P | 1688.101  | -3.605 | -                |
| DG <sub>o</sub> | Os010286_01 | S4 | 1.560  | 0.000  | P | 220.439  | P | 649.843   | P | 1190.308  | -2.433 | LOC_Os07g38990.1 |
| DG <sub>o</sub> | Os010290_01 | S4 | 2.718  | 0.000  | P | 153.002  | P | 1006.495  | P | 923.460   | -2.594 | LOC_Os03g09880.1 |
| DG <sub>o</sub> | Os010291_01 | S4 | 3.299  | 0.000  | P | 189.502  | P | 1864.533  | P | 1960.108  | -3.371 | LOC_Os01g48710.1 |

|                 |             |    |        |        |   |           |   |           |   |           |        |                  |
|-----------------|-------------|----|--------|--------|---|-----------|---|-----------|---|-----------|--------|------------------|
| DG <sub>0</sub> | Os010326_01 | S4 | 3.713  | 0.000  | P | 86.996    | P | 1140.517  | P | 1866.548  | -4.423 | LOC_Os07g43310.1 |
| DG <sub>0</sub> | Os010344_01 | S4 | 3.839  | 0.000  | P | 112.285   | P | 1606.876  | P | 1966.261  | -4.130 | LOC_Os04g53370.1 |
| DG <sub>0</sub> | Os010355_01 | S4 | 6.429  | 0.000  | P | 180.603   | P | 15565.852 | P | 31883.952 | -7.464 | -                |
| DG <sub>0</sub> | Os010372_01 | S4 | 0.000  | 1.471  | P | 32216.657 | P | 17969.609 | P | 6483.866  | 2.313  | LOC_Os01g14410.1 |
| DG <sub>0</sub> | Os010388_01 | S4 | 1.684  | 0.000  | P | 140.964   | P | 452.794   | P | 575.816   | -2.030 | -                |
| DG <sub>0</sub> | Os010400_01 | S4 | 4.403  | -1.441 | P | 175.214   | P | 3708.073  | P | 10066.630 | -5.844 | LOC_Os07g38540.1 |
| DG <sub>0</sub> | Os010407_01 | S4 | 2.083  | 0.000  | P | 429.134   | P | 1818.763  | P | 1714.660  | -1.998 | LOC_Os08g08120.3 |
| DG <sub>0</sub> | Os010416_01 | S4 | 1.573  | 0.000  | P | 188.906   | P | 562.074   | P | 906.103   | -2.262 | LOC_Os08g04340.1 |
| DG <sub>0</sub> | Os010424_01 | S4 | 4.936  | 0.000  | P | 525.150   | P | 16073.163 | P | 35292.105 | -6.070 | LOC_Os03g15080.2 |
| DG <sub>0</sub> | Os010435_01 | S4 | 4.166  | 0.000  | P | 276.207   | P | 4956.970  | P | 9344.703  | -5.080 | LOC_Os04g36770.1 |
| DG <sub>0</sub> | Os010446_01 | S4 | 1.769  | -1.631 | P | 183.134   | P | 623.950   | P | 1933.190  | -3.400 | LOC_Os04g56390.1 |
| DG <sub>0</sub> | Os010477_01 | S4 | 1.604  | 0.000  | P | 217.454   | P | 660.922   | P | 830.997   | -1.934 | -                |
| DG <sub>0</sub> | Os010478_01 | S4 | 3.897  | 0.000  | P | 152.934   | P | 2277.637  | P | 4225.654  | -4.788 | LOC_Os03g50110.1 |
| DG <sub>0</sub> | Os010488_01 | S4 | 2.904  | 0.000  | P | 334.247   | P | 2501.991  | P | 3576.480  | -3.420 | -                |
| DG <sub>0</sub> | Os010490_01 | S4 | 2.234  | -1.292 | P | 149.763   | P | 704.376   | P | 1724.887  | -3.526 | LOC_Os03g49480.1 |
| DG <sub>0</sub> | Os010492_01 | S4 | 3.890  | 0.000  | P | 119.891   | P | 1777.161  | P | 1626.455  | -3.762 | LOC_Os04g46930.2 |
| DG <sub>0</sub> | Os010501_01 | S4 | 0.000  | 2.406  | P | 471.383   | P | 660.990   | P | 124.706   | 1.918  | LOC_Os09g26670.1 |
| DG <sub>0</sub> | Os010503_01 | S4 | 7.377  | 0.000  | P | 128.082   | P | 21297.701 | P | 31044.783 | -7.921 | LOC_Os06g49690.1 |
| DG <sub>0</sub> | Os010568_01 | S4 | 3.204  | 0.000  | P | 110.453   | P | 1017.902  | P | 637.859   | -2.530 | LOC_Os01g60260.2 |
| DG <sub>0</sub> | Os010606_01 | S4 | 4.611  | 0.000  | P | 190.094   | P | 4643.920  | P | 9020.575  | -5.568 | LOC_Os10g02490.2 |
| DG <sub>0</sub> | Os010623_01 | S4 | 7.532  | 0.000  | P | 127.622   | P | 23618.982 | P | 35241.142 | -8.109 | LOC_Os04g42490.1 |
| DG <sub>0</sub> | Os011134_01 | S4 | 1.622  | 0.000  | P | 200.299   | P | 616.668   | P | 866.956   | -2.114 | LOC_Os01g37000.1 |
| DG <sub>0</sub> | Os011344_01 | S4 | 0.000  | 1.577  | P | 1612.553  | P | 1290.167  | P | 432.360   | 1.899  | -                |
| DG <sub>0</sub> | Os011581_01 | S4 | 0.000  | 2.215  | P | 1219.595  | P | 1069.074  | P | 230.218   | 2.405  | LOC_Os03g58580.1 |
| DG <sub>0</sub> | Os011874_01 | S4 | -1.221 | 0.000  | P | 1177.197  | P | 505.001   | P | 238.198   | 2.305  | LOC_Os03g47610.8 |
| DG <sub>0</sub> | Os012159_01 | S4 | 1.930  | 0.000  | P | 206.206   | P | 785.575   | P | 1052.518  | -2.352 | LOC_Os12g01140.1 |
| DG <sub>0</sub> | Os012670_01 | S4 | 2.353  | 0.000  | P | 176.773   | P | 903.287   | P | 627.695   | -1.828 | LOC_Os04g33310.1 |
| DG <sub>0</sub> | Os012919_01 | S4 | 0.000  | -1.500 | P | 772.632   | P | 920.764   | P | 2603.706  | -1.753 | LOC_Os01g11054.1 |
| DG <sub>0</sub> | Os013530_01 | S4 | 0.000  | 1.953  | P | 616.154   | P | 482.351   | P | 124.593   | 2.306  | LOC_Os08g30060.2 |
| DG <sub>0</sub> | Os013541_01 | S4 | 1.683  | 0.000  | P | 119.919   | P | 385.122   | P | 485.252   | -2.017 | LOC_Os10g22510.1 |
| DG <sub>0</sub> | Os013556_01 | S4 | 2.424  | 0.000  | P | 62.731    | P | 336.544   | P | 244.819   | -1.964 | LOC_Os02g35560.1 |

|                 |             |    |        |        |   |          |   |          |   |          |        |                  |
|-----------------|-------------|----|--------|--------|---|----------|---|----------|---|----------|--------|------------------|
| DG <sub>o</sub> | Os013775_01 | S4 | 1.695  | 0.000  | P | 168.634  | P | 546.126  | P | 926.899  | -2.459 | LOC_Os01g48930.1 |
| DG <sub>o</sub> | Os014025_01 | S4 | 1.981  | 0.000  | P | 123.616  | P | 488.067  | P | 590.247  | -2.255 | -                |
| DG <sub>o</sub> | Os014307_01 | S4 | -1.140 | 0.000  | P | 704.128  | P | 319.553  | P | 134.247  | 2.391  | LOC_Os07g32630.1 |
| DG <sub>o</sub> | Os014364_01 | S4 | 2.778  | -1.683 | P | 347.372  | P | 2382.061 | P | 7650.920 | -4.461 | LOC_Os01g45914.1 |
| DG <sub>o</sub> | Os014662_01 | S4 | 0.000  | 1.813  | P | 494.338  | P | 394.158  | P | 112.190  | 2.140  | LOC_Os03g17580.1 |
| DG <sub>o</sub> | Os014740_01 | S4 | 1.758  | 0.000  | P | 1908.198 | P | 6453.257 | P | 6421.947 | -1.751 | LOC_Os07g36080.1 |
| DG <sub>o</sub> | Os015155_01 | S4 | 2.427  | 0.000  | P | 117.491  | P | 631.698  | P | 505.651  | -2.106 | LOC_Os01g71590.3 |
| DG <sub>o</sub> | Os015919_01 | S4 | -1.838 | 0.000  | P | 1165.453 | P | 326.030  | P | 279.465  | 2.060  | LOC_Os03g44010.2 |
| DG <sub>o</sub> | Os015952_01 | S4 | 1.851  | 0.000  | P | 499.703  | P | 1802.787 | P | 2350.812 | -2.234 | LOC_Os10g37280.1 |
| DG <sub>o</sub> | Os016132_01 | S4 | 3.079  | 0.000  | P | 184.648  | P | 1560.633 | P | 2686.555 | -3.863 | LOC_Os04g14190.1 |
| DG <sub>o</sub> | Os016152_01 | S4 | 1.516  | 0.000  | P | 874.575  | P | 2501.430 | P | 3347.606 | -1.936 | -                |
| DG <sub>o</sub> | Os016404_01 | S4 | 1.608  | 0.000  | P | 1246.669 | P | 3800.107 | P | 6181.756 | -2.310 | LOC_Os01g15610.1 |
| DG <sub>o</sub> | Os016907_01 | S4 | 0.000  | 1.836  | P | 639.559  | P | 387.323  | P | 108.476  | 2.560  | LOC_Os11g40590.3 |
| DG <sub>o</sub> | Os017305_01 | S4 | 0.000  | -1.228 | P | 619.981  | P | 1249.267 | P | 2927.048 | -2.239 | -                |
| DG <sub>o</sub> | Os017820_01 | S4 | 0.000  | 1.404  | P | 1269.154 | P | 838.610  | P | 316.947  | 2.002  | LOC_Os04g36062.1 |
| DG <sub>o</sub> | Os017954_01 | S4 | 0.000  | 1.866  | P | 926.876  | P | 856.205  | P | 234.847  | 1.981  | LOC_Os08g04840.1 |
| DG <sub>o</sub> | Os018190_01 | S4 | 0.000  | 1.900  | P | 444.104  | P | 410.004  | P | 109.872  | 2.015  | LOC_Os01g43700.2 |
| DG <sub>o</sub> | Os018196_01 | S4 | -1.484 | 0.000  | P | 872.117  | P | 311.686  | P | 192.298  | 2.181  | LOC_Os03g55070.2 |
| DG <sub>o</sub> | Os018314_01 | S4 | -1.219 | 0.000  | P | 1844.997 | P | 792.369  | P | 474.849  | 1.958  | LOC_Os01g50050.1 |
| DG <sub>o</sub> | Os018766_01 | S4 | -1.280 | 0.000  | P | 2146.747 | P | 883.796  | P | 571.001  | 1.911  | LOC_Os04g40670.1 |
| DG <sub>o</sub> | Os018989_01 | S4 | 0.000  | 2.352  | P | 1147.847 | P | 876.495  | P | 171.634  | 2.742  | LOC_Os02g56850.3 |
| DG <sub>o</sub> | Os019400_01 | S4 | -2.028 | 0.000  | P | 1397.183 | P | 342.639  | P | 289.000  | 2.273  | LOC_Os01g70790.1 |
| DG <sub>o</sub> | Os019412_01 | S4 | 0.000  | 1.655  | P | 528.494  | P | 439.362  | P | 139.471  | 1.922  | LOC_Os04g56140.1 |
| DG <sub>o</sub> | Os019712_01 | S4 | 1.847  | 0.000  | P | 327.278  | P | 1177.192 | P | 1817.385 | -2.473 | LOC_Os02g11060.1 |
| DG <sub>o</sub> | Os019787_01 | S4 | 0.000  | 2.023  | P | 822.405  | P | 685.078  | P | 168.524  | 2.287  | LOC_Os05g33100.1 |
| DG <sub>o</sub> | Os019947_01 | S4 | 0.000  | 1.551  | P | 364.197  | P | 255.620  | P | 87.252   | 2.061  | LOC_Os11g12050.2 |
| DG <sub>o</sub> | Os020318_01 | S4 | 1.449  | 0.000  | P | 183.327  | P | 500.420  | P | 638.566  | -1.800 | LOC_Os07g14160.3 |
| DG <sub>o</sub> | Os020450_01 | S4 | 0.000  | 1.769  | P | 653.615  | P | 560.854  | P | 164.506  | 1.990  | LOC_Os08g34950.1 |
| DG <sub>o</sub> | Os020576_01 | S4 | 1.613  | 0.000  | P | 202.768  | P | 620.327  | P | 1163.569 | -2.521 | LOC_Os03g56270.2 |
| DG <sub>o</sub> | Os020948_01 | S4 | 0.000  | 1.633  | P | 614.873  | P | 456.864  | P | 147.299  | 2.062  | LOC_Os04g46880.2 |
| DG <sub>o</sub> | Os021555_01 | S4 | 0.000  | 1.641  | P | 474.283  | P | 366.419  | P | 117.456  | 2.014  | LOC_Os05g04530.1 |

|                 |             |    |        |        |   |           |   |           |   |           |        |                  |
|-----------------|-------------|----|--------|--------|---|-----------|---|-----------|---|-----------|--------|------------------|
| DG <sub>o</sub> | Os021788_01 | S4 | 0.000  | 1.739  | P | 524.009   | P | 360.129   | P | 107.870   | 2.280  | LOC_Os07g10480.1 |
| DG <sub>o</sub> | Os021870_01 | S4 | 0.000  | -1.285 | P | 312.520   | P | 626.661   | P | 1526.750  | -2.288 | LOC_Os07g41060.1 |
| DG <sub>o</sub> | Os022024_01 | S4 | -1.151 | 0.000  | P | 1051.795  | P | 473.773   | P | 261.665   | 2.007  | LOC_Os02g03840.1 |
| DG <sub>o</sub> | Os022090_01 | S4 | 1.802  | 0.000  | P | 79.130    | P | 275.904   | P | 275.554   | -1.800 | LOC_Os04g47250.1 |
| DG <sub>o</sub> | Os022442_01 | S4 | 2.622  | 0.000  | P | 126.988   | P | 781.851   | P | 1018.231  | -3.003 | -                |
| DG <sub>o</sub> | Os023251_01 | S4 | 3.301  | 0.000  | P | 130.423   | P | 1285.709  | P | 736.444   | -2.497 | -                |
| DG <sub>o</sub> | Os024073_01 | S4 | 0.000  | 2.478  | P | 694.039   | P | 778.085   | P | 139.627   | 2.313  | -                |
| DG <sub>o</sub> | Os024100_01 | S4 | 0.000  | -1.513 | P | 251.651   | P | 418.044   | P | 1193.111  | -2.245 | LOC_Os05g03750.1 |
| DG <sub>o</sub> | Os025787_01 | S4 | 0.000  | 4.119  | P | 23473.327 | P | 21224.196 | P | 1221.412  | 4.264  | LOC_Os12g04980.1 |
| DG <sub>o</sub> | Os026025_01 | S4 | 0.000  | 1.668  | P | 1026.865  | P | 695.380   | P | 218.847   | 2.230  | LOC_Os02g02930.1 |
| DG <sub>o</sub> | Os026150_01 | S4 | 2.236  | 0.000  | P | 273.431   | P | 1288.337  | P | 1886.239  | -2.786 | LOC_Os01g07620.1 |
| DG <sub>o</sub> | Os028680_01 | S4 | 2.516  | 0.000  | P | 176.619   | P | 1010.529  | P | 1334.953  | -2.918 | LOC_Os07g06100.1 |
| DG <sub>o</sub> | Os028716_01 | S4 | 0.000  | 2.819  | P | 654.475   | P | 554.809   | P | 78.628    | 3.057  | LOC_Os02g07320.1 |
| DG <sub>o</sub> | Os029713_01 | S4 | -1.069 | 0.000  | P | 8561.171  | P | 4079.924  | P | 1944.936  | 2.138  | LOC_Os07g30990.1 |
| DG <sub>o</sub> | Os029900_01 | S4 | 0.000  | -1.736 | P | 241.954   | P | 258.609   | P | 861.352   | -1.832 | -                |
| DG <sub>o</sub> | Os030032_01 | S4 | 1.460  | 0.000  | P | 117.719   | P | 323.840   | P | 555.294   | -2.238 | LOC_Os06g48560.1 |
| DG <sub>o</sub> | Os030155_01 | S4 | 0.000  | -3.924 | P | 165.288   | P | 334.314   | P | 5074.039  | -4.940 | LOC_Os02g14080.1 |
| DG <sub>o</sub> | Os030295_01 | S4 | 2.477  | 0.000  | P | 2246.705  | P | 12508.171 | P | 24811.688 | -3.465 | LOC_Os12g08150.1 |
| DG <sub>o</sub> | Os030630_01 | S4 | 0.000  | -1.639 | P | 144.045   | P | 207.942   | P | 647.831   | -2.169 | LOC_Os03g26470.1 |
| DG <sub>o</sub> | Os030993_01 | S4 | 0.000  | -2.379 | P | 338.510   | P | 361.250   | P | 1879.004  | -2.473 | -                |
| DG <sub>o</sub> | Os031740_01 | S4 | 0.000  | 1.933  | P | 832.534   | P | 513.149   | P | 134.399   | 2.631  | LOC_Os07g05890.1 |
| DG <sub>o</sub> | Os031745_01 | S4 | 1.815  | 0.000  | P | 3188.687  | P | 11221.626 | P | 19808.633 | -2.635 | -                |
| DG <sub>o</sub> | Os032085_01 | S4 | 0.000  | -1.933 | P | 145.794   | P | 185.783   | P | 709.633   | -2.283 | LOC_Os06g10980.1 |
| DG <sub>o</sub> | Os032441_01 | S4 | 0.000  | -1.755 | P | 190.922   | P | 314.971   | P | 1062.853  | -2.477 | LOC_Os03g29470.1 |
| DG <sub>o</sub> | Os032459_01 | S4 | 0.000  | -1.649 | P | 96.981    | P | 178.984   | P | 561.184   | -2.533 | LOC_Os02g44560.1 |
| DG <sub>o</sub> | Os032489_01 | S4 | 0.000  | -4.401 | P | 127.711   | P | 276.961   | P | 5849.591  | -5.517 | LOC_Os06g38080.1 |
| DG <sub>o</sub> | Os032863_01 | S4 | 0.000  | -1.507 | P | 234.089   | P | 285.075   | P | 810.266   | -1.791 | -                |
| DG <sub>o</sub> | Os033054_01 | S4 | 0.000  | -1.908 | P | 162.008   | P | 160.838   | P | 603.510   | -1.897 | -                |
| DG <sub>o</sub> | Os033172_01 | S4 | 0.000  | -2.157 | P | 236.986   | P | 250.108   | P | 1115.154  | -2.234 | LOC_Os03g31790.1 |
| DG <sub>o</sub> | Os034271_01 | S4 | 0.000  | 1.475  | P | 657.648   | P | 489.161   | P | 175.951   | 1.902  | LOC_Os09g09230.1 |
| DG <sub>o</sub> | Os034759_01 | S4 | 0.000  | 2.490  | P | 6599.000  | P | 3807.500  | P | 677.710   | 3.284  | LOC_Os04g13090.1 |

|                 |             |    |        |        |   |           |   |           |   |           |        |                  |
|-----------------|-------------|----|--------|--------|---|-----------|---|-----------|---|-----------|--------|------------------|
| DG <sub>o</sub> | Os035262_01 | S4 | 0.000  | -1.706 | P | 118.700   | P | 202.874   | P | 662.105   | -2.480 | LOC_Os05g32060.1 |
| DG <sub>o</sub> | Os037234_01 | S4 | 0.000  | 2.476  | P | 1080.291  | P | 836.987   | P | 150.453   | 2.844  | LOC_Os07g11440.1 |
| DG <sub>o</sub> | Os037668_01 | S4 | 1.712  | 0.000  | P | 2940.253  | P | 9635.683  | P | 17165.011 | -2.545 | LOC_Os04g40120.1 |
| DG <sub>o</sub> | Os038923_01 | S4 | 0.000  | 1.661  | P | 357.685   | P | 315.860   | P | 99.908    | 1.840  | LOC_Os11g05830.1 |
| DG <sub>o</sub> | Os039580_01 | S4 | 0.000  | 1.796  | P | 1759.927  | P | 945.870   | P | 272.475   | 2.691  | LOC_Os02g40180.1 |
| DG <sub>o</sub> | Os039707_01 | S4 | 1.780  | 0.000  | P | 139.641   | P | 479.485   | P | 559.973   | -2.004 | -                |
| DG <sub>o</sub> | Os039819_01 | S4 | -1.294 | 0.000  | P | 793.478   | P | 323.630   | P | 193.561   | 2.035  | LOC_Os12g40260.1 |
| DG <sub>o</sub> | Os040011_01 | S4 | 0.000  | 2.177  | P | 319.851   | P | 342.186   | P | 75.688    | 2.079  | LOC_Os04g07930.1 |
| DG <sub>o</sub> | Os040796_01 | S4 | 0.000  | -1.839 | P | 147.932   | P | 161.152   | P | 576.508   | -1.962 | LOC_Os04g55400.1 |
| DG <sub>o</sub> | Os041269_01 | S4 | 2.069  | 0.000  | P | 112.040   | P | 469.960   | P | 800.391   | -2.837 | LOC_Os10g01500.1 |
| DG <sub>o</sub> | Os041845_01 | S4 | 1.616  | 0.000  | P | 102.517   | P | 314.321   | P | 460.383   | -2.167 | LOC_Os02g29540.1 |
| DG <sub>o</sub> | Os042013_01 | S4 | 2.161  | -1.159 | P | 4661.550  | P | 20841.968 | P | 46528.396 | -3.319 | LOC_Os08g19330.1 |
| DG <sub>o</sub> | Os043715_01 | S4 | 1.975  | 0.000  | P | 101.660   | P | 399.695   | P | 529.770   | -2.382 | LOC_Os10g39070.1 |
| DG <sub>o</sub> | Os043803_01 | S4 | 0.000  | 1.922  | P | 649.536   | P | 698.264   | P | 184.283   | 1.817  | LOC_Os04g20280.1 |
| DG <sub>o</sub> | Os044300_01 | S4 | -1.741 | 2.115  | P | 47812.906 | P | 14303.377 | P | 3301.022  | 3.856  | LOC_Os05g11320.1 |
| DG <sub>o</sub> | Os044617_01 | S4 | 2.064  | -1.248 | P | 1169.763  | P | 4889.638  | P | 11612.922 | -3.311 | -                |
| DG <sub>o</sub> | Os044797_01 | S4 | 2.182  | 0.000  | P | 83.710    | P | 379.820   | P | 287.910   | -1.782 | LOC_Os09g19180.1 |
| DG <sub>o</sub> | Os045117_01 | S4 | 1.454  | 0.000  | P | 561.879   | P | 1539.465  | P | 2282.026  | -2.022 | LOC_Os06g06310.1 |
| DG <sub>o</sub> | Os045207_01 | S4 | 1.538  | 0.000  | P | 990.916   | P | 2877.874  | P | 5077.840  | -2.357 | -                |
| DG <sub>o</sub> | Os045347_01 | S4 | 1.943  | 0.000  | P | 306.513   | P | 1178.336  | P | 1494.422  | -2.286 | LOC_Os06g18120.1 |
| DG <sub>o</sub> | Os045359_01 | S4 | 1.756  | 0.000  | P | 406.518   | P | 1372.924  | P | 2373.585  | -2.546 | LOC_Os06g09250.1 |
| DG <sub>o</sub> | Os045565_01 | S4 | 2.614  | -1.186 | P | 265.063   | P | 1623.183  | P | 3693.918  | -3.801 | LOC_Os10g09630.1 |
| DG <sub>o</sub> | Os045577_01 | S4 | 1.845  | 0.000  | P | 1138.655  | P | 4089.516  | P | 6179.461  | -2.440 | LOC_Os12g07990.1 |
| DG <sub>o</sub> | Os045664_01 | S4 | 1.626  | 0.000  | P | 1376.601  | P | 4248.104  | P | 5699.891  | -2.050 | LOC_Os02g25890.1 |
| DG <sub>o</sub> | Os046413_01 | S4 | 1.503  | 0.000  | P | 239.450   | P | 678.554   | P | 1012.207  | -2.080 | LOC_Os02g11990.1 |
| DG <sub>o</sub> | Os047459_01 | S4 | 1.838  | 0.000  | P | 745.318   | P | 2664.496  | P | 4430.438  | -2.572 | LOC_Os01g12940.1 |
| DG <sub>o</sub> | Os047880_01 | S4 | 1.738  | 0.000  | P | 277.669   | P | 926.222   | P | 1227.911  | -2.145 | -                |
| DG <sub>o</sub> | Os048713_01 | S4 | 0.000  | -1.224 | P | 534.776   | P | 825.742   | P | 1928.644  | -1.851 | LOC_Os11g27090.1 |
| DG <sub>o</sub> | Os049013_01 | S4 | 1.655  | 0.000  | P | 112.071   | P | 352.880   | P | 385.869   | -1.784 | LOC_Os02g29170.1 |
| DG <sub>o</sub> | Os049649_01 | S4 | 1.436  | 0.000  | P | 220.448   | P | 596.649   | P | 931.317   | -2.079 | -                |
| DG <sub>o</sub> | Os051250_01 | S4 | 0.000  | 1.869  | P | 904.855   | P | 862.616   | P | 236.229   | 1.938  | -                |

|                 |             |    |        |        |   |           |   |          |   |          |        |                  |
|-----------------|-------------|----|--------|--------|---|-----------|---|----------|---|----------|--------|------------------|
| DG <sub>o</sub> | Os051869_01 | S4 | 0.000  | -3.008 | P | 173.269   | P | 158.138  | P | 1272.576 | -2.877 | LOC_Os11g45090.1 |
| DG <sub>o</sub> | Os051916_01 | S4 | 0.000  | 1.453  | P | 13385.812 | P | 9660.851 | P | 3529.827 | 1.923  | LOC_Os06g46770.2 |
| DG <sub>o</sub> | Os052084_01 | S4 | 0.000  | 3.153  | P | 1661.197  | P | 896.892  | P | 100.825  | 4.042  | LOC_Os11g32650.1 |
| DG <sub>o</sub> | Os052161_01 | S4 | 1.679  | 0.000  | P | 134.796   | P | 431.650  | P | 519.688  | -1.947 | LOC_Os02g02960.4 |
| DG <sub>o</sub> | Os052234_01 | S4 | 0.000  | 1.815  | P | 1424.245  | P | 1158.667 | P | 329.260  | 2.113  | -                |
| DG <sub>o</sub> | Os052911_01 | S4 | 1.986  | 0.000  | P | 98.336    | P | 389.588  | P | 513.198  | -2.384 | LOC_Os08g04500.1 |
| DG <sub>o</sub> | Os053372_01 | S4 | 0.000  | -1.782 | P | 87.639    | P | 177.205  | P | 609.355  | -2.798 | LOC_Os01g03500.1 |
| DG <sub>o</sub> | Os054491_01 | S4 | 1.589  | 0.000  | P | 311.942   | P | 938.283  | P | 1757.764 | -2.494 | -                |
| DG <sub>o</sub> | Os054741_01 | S4 | 2.208  | -1.477 | P | 177.272   | P | 819.139  | P | 2279.495 | -3.685 | -                |
| DG <sub>o</sub> | Os055644_01 | S4 | 0.000  | 1.412  | P | 2211.992  | P | 1182.623 | P | 444.442  | 2.315  | LOC_Os01g61400.1 |
| DG <sub>o</sub> | Os057647_02 | S4 | 2.014  | -1.359 | P | 145.488   | P | 587.464  | P | 1507.323 | -3.373 | -                |
| DG <sub>o</sub> | Os000128_01 | S7 | 0.000  | -1.771 | P | 1285.015  | P | 1244.609 | P | 4248.274 | -1.725 | LOC_Os06g12740.1 |
| DG <sub>o</sub> | Os000151_01 | S7 | 0.000  | -1.448 | P | 168.742   | P | 210.424  | P | 574.097  | -1.766 | LOC_Os10g41260.1 |
| DG <sub>o</sub> | Os000174_01 | S7 | 0.749  | -1.522 | P | 285.199   | P | 479.445  | P | 1377.014 | -2.272 | LOC_Os04g17100.1 |
| DG <sub>o</sub> | Os000205_01 | S7 | -1.013 | 0.000  | P | 907.306   | P | 449.457  | P | 231.751  | 1.969  | LOC_Os04g42860.1 |
| DG <sub>o</sub> | Os000208_01 | S7 | -1.197 | 0.000  | P | 1219.405  | P | 532.046  | P | 380.437  | 1.680  | LOC_Os02g09150.1 |
| DG <sub>o</sub> | Os000219_01 | S7 | 0.000  | 1.606  | P | 784.479   | P | 758.077  | P | 249.094  | 1.655  | LOC_Os09g36830.1 |
| DG <sub>o</sub> | Os000273_01 | S7 | 0.000  | 1.773  | P | 2014.882  | P | 1773.771 | P | 519.033  | 1.957  | LOC_Os04g48490.1 |
| DG <sub>o</sub> | Os000386_01 | S7 | 0.000  | -1.753 | P | 259.690   | P | 310.364  | P | 1046.275 | -2.010 | LOC_Os06g08670.1 |
| DG <sub>o</sub> | Os000403_01 | S7 | 0.000  | -1.879 | P | 225.449   | P | 277.639  | P | 1021.110 | -2.179 | LOC_Os12g08260.2 |
| DG <sub>o</sub> | Os000442_01 | S7 | -1.271 | 0.000  | P | 1080.669  | P | 447.880  | P | 197.044  | 2.455  | LOC_Os03g01320.1 |
| DG <sub>o</sub> | Os000533_01 | S7 | 0.000  | 1.656  | P | 1496.825  | P | 1282.926 | P | 406.989  | 1.879  | LOC_Os06g10760.1 |
| DG <sub>o</sub> | Os000743_01 | S7 | 0.000  | 1.621  | P | 1398.898  | P | 1017.784 | P | 330.887  | 2.080  | LOC_Os04g42580.1 |
| DG <sub>o</sub> | Os001367_01 | S7 | 0.000  | 1.852  | P | 4107.665  | P | 4379.878 | P | 1213.111 | 1.760  | LOC_Os11g40590.3 |
| DG <sub>o</sub> | Os001606_01 | S7 | 0.000  | -1.612 | P | 588.794   | P | 560.455  | P | 1712.922 | -1.541 | LOC_Os06g44450.1 |
| DG <sub>o</sub> | Os001657_01 | S7 | 0.000  | -1.883 | P | 191.559   | P | 240.375  | P | 886.512  | -2.210 | LOC_Os07g48090.1 |
| DG <sub>o</sub> | Os002138_01 | S7 | 0.000  | -1.437 | P | 432.997   | P | 587.907  | P | 1591.915 | -1.878 | -                |
| DG <sub>o</sub> | Os002150_01 | S7 | 0.000  | -1.951 | P | 1163.173  | P | 968.803  | P | 3746.676 | -1.688 | LOC_Os03g30470.1 |
| DG <sub>o</sub> | Os002390_01 | S7 | -0.872 | -2.708 | P | 1477.486  | P | 807.518  | P | 5276.541 | -1.836 | LOC_Os07g05360.1 |
| DG <sub>o</sub> | Os002472_01 | S7 | 0.000  | -1.828 | P | 145.697   | P | 131.322  | P | 466.377  | -1.679 | LOC_Os06g17570.1 |
| DG <sub>o</sub> | Os002918_01 | S7 | 0.000  | -1.686 | P | 148.564   | P | 189.428  | P | 609.602  | -2.037 | LOC_Os05g38680.1 |



|                 |                |        |        |   |           |   |           |   |           |        |                  |
|-----------------|----------------|--------|--------|---|-----------|---|-----------|---|-----------|--------|------------------|
| DG <sub>o</sub> | Os004153_02 S7 | 1.803  | 0.000  | P | 208.079   | P | 726.018   | P | 1231.754  | -2.566 | -                |
| DG <sub>o</sub> | Os004406_01 S7 | 0.000  | -2.469 | P | 272.024   | P | 247.754   | P | 1372.030  | -2.335 | LOC_Os09g28390.1 |
| DG <sub>o</sub> | Os005094_01 S7 | 0.000  | -1.955 | P | 335.015   | P | 313.453   | P | 1214.933  | -1.859 | -                |
| DG <sub>o</sub> | Os005478_01 S7 | 0.000  | -1.580 | P | 438.114   | P | 654.943   | P | 1958.421  | -2.160 | LOC_Os08g45060.1 |
| DG <sub>o</sub> | Os005879_01 S7 | 0.000  | 1.603  | P | 499.508   | P | 462.485   | P | 152.267   | 1.714  | LOC_Os09g37610.1 |
| DG <sub>o</sub> | Os005908_01 S7 | 0.000  | 2.452  | P | 4786.331  | P | 3586.348  | P | 655.235   | 2.869  | LOC_Os07g45210.1 |
| DG <sub>o</sub> | Os006414_01 S7 | -0.791 | 1.827  | P | 3490.680  | P | 2017.392  | P | 568.777   | 2.618  | LOC_Os01g51020.1 |
| DG <sub>o</sub> | Os006619_01 S7 | 0.000  | 2.182  | P | 591.052   | P | 636.172   | P | 140.223   | 2.076  | LOC_Os06g44310.1 |
| DG <sub>o</sub> | Os008399_01 S7 | 0.000  | 3.246  | P | 2857.417  | P | 2114.532  | P | 222.915   | 3.680  | LOC_Os08g40930.1 |
| DG <sub>o</sub> | Os008529_01 S7 | 1.314  | 0.000  | P | 412.438   | P | 1025.706  | P | 1663.889  | -2.012 | LOC_Os07g02210.2 |
| DG <sub>o</sub> | Os008617_01 S7 | 0.000  | 1.553  | P | 1060.186  | P | 832.128   | P | 283.573   | 1.903  | LOC_Os07g33680.1 |
| DG <sub>o</sub> | Os008633_01 S7 | -1.141 | 0.000  | P | 757.999   | P | 343.649   | P | 222.670   | 1.767  | LOC_Os04g32560.2 |
| DG <sub>o</sub> | Os008680_01 S7 | 0.000  | 1.699  | P | 462.826   | P | 354.394   | P | 109.124   | 2.085  | LOC_Os02g18410.1 |
| DG <sub>o</sub> | Os008681_01 S7 | 0.000  | 1.577  | P | 416.436   | P | 335.047   | P | 112.263   | 1.891  | LOC_Os06g45000.2 |
| DG <sub>o</sub> | Os008778_01 S7 | -0.780 | 0.000  | P | 7913.996  | P | 4608.067  | P | 2457.547  | 1.687  | LOC_Os05g31000.1 |
| DG <sub>o</sub> | Os008783_01 S7 | 0.000  | 1.679  | P | 3803.112  | P | 2399.436  | P | 749.351   | 2.343  | LOC_Os01g16890.1 |
| DG <sub>o</sub> | Os008842_01 S7 | 0.000  | -1.831 | P | 405.530   | P | 373.109   | P | 1327.652  | -1.711 | LOC_Os11g39020.1 |
| DG <sub>o</sub> | Os008917_01 S7 | -0.882 | 0.000  | P | 870.728   | P | 472.451   | P | 219.129   | 1.990  | LOC_Os05g22940.1 |
| DG <sub>o</sub> | Os008947_01 S7 | -1.983 | 0.000  | P | 5345.580  | P | 1351.780  | P | 612.866   | 3.125  | LOC_Os08g08980.1 |
| DG <sub>o</sub> | Os009120_01 S7 | -1.423 | 0.000  | P | 6024.391  | P | 2246.459  | P | 1313.047  | 2.198  | LOC_Os08g13440.2 |
| DG <sub>o</sub> | Os009124_01 S7 | 0.000  | -1.820 | P | 17511.060 | P | 17881.057 | P | 63128.533 | -1.850 | LOC_Os12g02310.1 |
| DG <sub>o</sub> | Os009299_01 S7 | 0.000  | 1.862  | P | 409.139   | P | 476.102   | P | 130.936   | 1.644  | LOC_Os06g39260.1 |
| DG <sub>o</sub> | Os009300_01 S7 | -0.886 | 0.000  | P | 1154.110  | P | 624.434   | P | 246.999   | 2.224  | LOC_Os07g30154.1 |
| DG <sub>o</sub> | Os009387_01 S7 | 0.000  | 1.981  | P | 1835.114  | P | 1736.436  | P | 439.728   | 2.061  | LOC_Os07g42600.1 |
| DG <sub>o</sub> | Os009416_01 S7 | 0.000  | 1.636  | P | 731.548   | P | 612.978   | P | 197.283   | 1.891  | LOC_Os03g27010.1 |
| DG <sub>o</sub> | Os009458_01 S7 | 0.000  | 1.937  | P | 406.489   | P | 422.677   | P | 110.352   | 1.881  | LOC_Os08g06420.1 |
| DG <sub>o</sub> | Os009562_01 S7 | 0.000  | -2.411 | P | 283.426   | P | 270.415   | P | 1437.986  | -2.343 | LOC_Os03g22270.1 |
| DG <sub>o</sub> | Os009821_01 S7 | 0.000  | -1.913 | P | 205.738   | P | 210.827   | P | 793.803   | -1.948 | LOC_Os03g46660.1 |
| DG <sub>o</sub> | Os009880_01 S7 | 0.000  | 1.735  | P | 684.549   | P | 430.684   | P | 129.357   | 2.404  | LOC_Os05g08990.1 |
| DG <sub>o</sub> | Os009887_01 S7 | 0.000  | 2.096  | P | 1893.730  | P | 1776.716  | P | 415.685   | 2.188  | LOC_Os03g16440.1 |
| DG <sub>o</sub> | Os009986_01 S7 | 0.795  | -1.383 | P | 493.559   | P | 856.647   | P | 2234.047  | -2.178 | -                |

|                 |             |    |        |        |   |          |   |          |   |          |        |                  |
|-----------------|-------------|----|--------|--------|---|----------|---|----------|---|----------|--------|------------------|
| DG <sub>o</sub> | Os010088_01 | S7 | 0.000  | 1.515  | P | 3633.581 | P | 2310.419 | P | 808.317  | 2.168  | LOC_Os03g14530.1 |
| DG <sub>o</sub> | Os010136_01 | S7 | 0.000  | 1.589  | P | 1162.622 | P | 809.595  | P | 269.170  | 2.111  | LOC_Os11g06730.1 |
| DG <sub>o</sub> | Os010230_01 | S7 | 0.000  | 1.505  | P | 623.957  | P | 542.157  | P | 191.061  | 1.707  | -                |
| DG <sub>o</sub> | Os010444_01 | S7 | 0.000  | 1.815  | P | 641.147  | P | 427.603  | P | 121.554  | 2.399  | -                |
| DG <sub>o</sub> | Os010884_01 | S7 | 0.000  | 1.515  | P | 1595.072 | P | 1103.586 | P | 386.011  | 2.047  | LOC_Os12g03110.1 |
| DG <sub>o</sub> | Os010961_01 | S7 | 0.000  | -1.548 | P | 197.952  | P | 200.441  | P | 586.189  | -1.566 | -                |
| DG <sub>o</sub> | Os011110_01 | S7 | 0.000  | 2.447  | P | 673.905  | P | 698.478  | P | 128.119  | 2.395  | LOC_Os01g47130.1 |
| DG <sub>o</sub> | Os011125_01 | S7 | 0.000  | -2.257 | P | 360.254  | P | 303.347  | P | 1450.355 | -2.009 | LOC_Os08g40680.1 |
| DG <sub>o</sub> | Os011394_01 | S7 | 0.000  | -1.602 | P | 210.180  | P | 250.074  | P | 758.884  | -1.852 | LOC_Os12g34110.1 |
| DG <sub>o</sub> | Os011401_01 | S7 | 0.000  | -1.624 | P | 189.045  | P | 212.512  | P | 654.832  | -1.792 | LOC_Os10g31856.1 |
| DG <sub>o</sub> | Os011415_01 | S7 | 0.000  | -2.104 | P | 1717.589 | P | 1236.608 | P | 5317.170 | -1.630 | LOC_Os12g10604.1 |
| DG <sub>o</sub> | Os011578_01 | S7 | 0.000  | -2.294 | P | 391.761  | P | 399.472  | P | 1958.851 | -2.322 | LOC_Os03g38730.1 |
| DG <sub>o</sub> | Os011722_01 | S7 | 0.000  | -1.638 | P | 265.456  | P | 346.017  | P | 1077.294 | -2.021 | LOC_Os03g03390.1 |
| DG <sub>o</sub> | Os011780_01 | S7 | -0.880 | 0.000  | P | 583.379  | P | 317.072  | P | 188.367  | 1.631  | LOC_Os01g66300.1 |
| DG <sub>o</sub> | Os011849_01 | S7 | 0.000  | 1.519  | P | 1130.670 | P | 899.301  | P | 313.852  | 1.849  | LOC_Os09g36230.1 |
| DG <sub>o</sub> | Os011851_01 | S7 | 0.000  | -1.582 | P | 554.291  | P | 560.189  | P | 1677.178 | -1.597 | LOC_Os05g04630.6 |
| DG <sub>o</sub> | Os011930_01 | S7 | 0.000  | -1.579 | P | 182.667  | P | 223.707  | P | 668.374  | -1.871 | LOC_Os08g38460.1 |
| DG <sub>o</sub> | Os012299_01 | S7 | 0.000  | 2.041  | P | 4632.289 | P | 3453.092 | P | 839.165  | 2.465  | LOC_Os09g38030.1 |
| DG <sub>o</sub> | Os012723_01 | S7 | 0.000  | -2.141 | P | 645.951  | P | 628.498  | P | 2771.671 | -2.101 | LOC_Os03g03910.1 |
| DG <sub>o</sub> | Os012781_01 | S7 | 0.000  | -2.761 | P | 140.344  | P | 178.812  | P | 1211.977 | -3.110 | LOC_Os11g25780.1 |
| DG <sub>o</sub> | Os012910_01 | S7 | 0.000  | -2.341 | P | 121.889  | P | 148.854  | P | 754.269  | -2.630 | LOC_Os12g38170.1 |
| DG <sub>o</sub> | Os013145_01 | S7 | 0.000  | -1.493 | P | 286.292  | P | 293.014  | P | 825.036  | -1.527 | LOC_Os02g38820.1 |
| DG <sub>o</sub> | Os013232_01 | S7 | 0.000  | -1.701 | P | 492.533  | P | 437.960  | P | 1424.000 | -1.532 | LOC_Os03g56280.1 |
| DG <sub>o</sub> | Os013295_01 | S7 | 0.000  | -2.092 | P | 449.358  | P | 460.416  | P | 1962.899 | -2.127 | -                |
| DG <sub>o</sub> | Os013388_01 | S7 | 0.000  | -1.824 | P | 322.675  | P | 294.689  | P | 1043.068 | -1.693 | LOC_Os01g07120.2 |
| DG <sub>o</sub> | Os013426_01 | S7 | 0.000  | -1.704 | P | 182.131  | P | 154.537  | P | 503.542  | -1.467 | LOC_Os12g35630.1 |
| DG <sub>o</sub> | Os013504_01 | S7 | 0.000  | -1.506 | P | 154.261  | P | 159.461  | P | 453.000  | -1.554 | LOC_Os03g15020.1 |
| DG <sub>o</sub> | Os013568_01 | S7 | 0.000  | -1.825 | P | 184.244  | P | 183.277  | P | 649.480  | -1.818 | LOC_Os08g40150.2 |
| DG <sub>o</sub> | Os013619_01 | S7 | 0.000  | -1.764 | P | 359.147  | P | 366.515  | P | 1244.464 | -1.793 | -                |
| DG <sub>o</sub> | Os013643_01 | S7 | 0.000  | -1.755 | P | 215.907  | P | 209.267  | P | 706.440  | -1.710 | LOC_Os10g36550.3 |
| DG <sub>o</sub> | Os013659_01 | S7 | 0.000  | -1.663 | P | 218.648  | P | 203.128  | P | 643.116  | -1.556 | LOC_Os03g60080.1 |

|                 |                |       |        |   |           |   |           |   |          |        |                  |
|-----------------|----------------|-------|--------|---|-----------|---|-----------|---|----------|--------|------------------|
| DG <sub>o</sub> | Os013775_01 S7 | 0.000 | -1.465 | P | 248.288   | P | 263.305   | P | 726.654  | -1.549 | LOC_Os01g48930.1 |
| DG <sub>o</sub> | Os014092_01 S7 | 0.000 | -1.533 | P | 243.671   | P | 245.315   | P | 709.902  | -1.543 | LOC_Os11g08300.1 |
| DG <sub>o</sub> | Os014282_01 S7 | 0.000 | -1.790 | P | 106.665   | P | 164.228   | P | 568.009  | -2.413 | LOC_Os10g40030.8 |
| DG <sub>o</sub> | Os014555_01 S7 | 0.000 | 2.175  | P | 13870.638 | P | 18281.943 | P | 4047.357 | 1.777  | LOC_Os06g51084.1 |
| DG <sub>o</sub> | Os014604_01 S7 | 0.000 | -2.599 | P | 133.689   | P | 153.383   | P | 929.367  | -2.797 | LOC_Os01g04710.1 |
| DG <sub>o</sub> | Os014654_01 S7 | 0.000 | -1.856 | P | 252.109   | P | 242.904   | P | 879.149  | -1.802 | LOC_Os10g30790.2 |
| DG <sub>o</sub> | Os014740_01 S7 | 0.000 | -2.825 | P | 673.780   | P | 399.520   | P | 2831.026 | -2.071 | LOC_Os07g36080.1 |
| DG <sub>o</sub> | Os014891_01 S7 | 0.874 | 0.000  | P | 242.121   | P | 443.787   | P | 670.740  | -1.470 | LOC_Os03g01190.1 |
| DG <sub>o</sub> | Os015150_01 S7 | 0.000 | -1.516 | P | 800.549   | P | 965.184   | P | 2760.007 | -1.786 | LOC_Os06g41010.4 |
| DG <sub>o</sub> | Os015152_01 S7 | 0.000 | -1.619 | P | 219.736   | P | 273.171   | P | 838.852  | -1.933 | LOC_Os05g49300.1 |
| DG <sub>o</sub> | Os015335_01 S7 | 0.000 | 1.757  | P | 3931.652  | P | 4192.241  | P | 1240.456 | 1.664  | LOC_Os11g10050.1 |
| DG <sub>o</sub> | Os015666_01 S7 | 0.000 | -1.768 | P | 1172.209  | P | 1128.268  | P | 3842.047 | -1.713 | LOC_Os03g10090.1 |
| DG <sub>o</sub> | Os015668_01 S7 | 1.012 | 0.000  | P | 376.161   | P | 758.523   | P | 1402.174 | -1.898 | LOC_Os01g72890.2 |
| DG <sub>o</sub> | Os015784_01 S7 | 0.000 | -1.518 | P | 241.219   | P | 320.522   | P | 917.743  | -1.928 | LOC_Os02g06910.1 |
| DG <sub>o</sub> | Os015790_01 S7 | 0.000 | -1.779 | P | 626.488   | P | 710.063   | P | 2437.220 | -1.960 | -                |
| DG <sub>o</sub> | Os015816_01 S7 | 0.000 | -2.738 | P | 151.286   | P | 151.398   | P | 1009.824 | -2.739 | LOC_Os12g37840.1 |
| DG <sub>o</sub> | Os015857_01 S7 | 0.870 | 0.000  | P | 262.128   | P | 479.029   | P | 956.333  | -1.867 | LOC_Os02g53970.1 |
| DG <sub>o</sub> | Os016023_01 S7 | 1.088 | 0.000  | P | 164.977   | P | 350.671   | P | 590.164  | -1.839 | LOC_Os11g38980.4 |
| DG <sub>o</sub> | Os016085_01 S7 | 0.000 | -1.611 | P | 766.024   | P | 855.945   | P | 2615.428 | -1.772 | LOC_Os09g12150.1 |
| DG <sub>o</sub> | Os016116_01 S7 | 2.454 | 0.000  | P | 160.642   | P | 880.413   | P | 1621.964 | -3.336 | LOC_Os04g53450.1 |
| DG <sub>o</sub> | Os016442_01 S7 | 0.000 | 2.626  | P | 7831.776  | P | 10095.013 | P | 1635.724 | 2.259  | LOC_Os01g44220.6 |
| DG <sub>o</sub> | Os016661_01 S7 | 0.000 | 2.015  | P | 6347.373  | P | 6434.667  | P | 1591.863 | 1.995  | LOC_Os08g25734.1 |
| DG <sub>o</sub> | Os016878_01 S7 | 0.000 | -1.681 | P | 234.280   | P | 215.409   | P | 690.912  | -1.560 | LOC_Os02g18450.1 |
| DG <sub>o</sub> | Os016919_01 S7 | 0.000 | -1.498 | P | 259.870   | P | 357.705   | P | 1010.437 | -1.959 | LOC_Os02g01590.1 |
| DG <sub>o</sub> | Os017058_01 S7 | 0.000 | -1.725 | P | 203.688   | P | 176.115   | P | 582.149  | -1.515 | LOC_Os05g33940.1 |
| DG <sub>o</sub> | Os017090_01 S7 | 1.517 | 0.000  | P | 157.001   | P | 449.270   | P | 581.098  | -1.888 | LOC_Os02g47150.1 |
| DG <sub>o</sub> | Os017238_01 S7 | 0.000 | -1.816 | P | 514.797   | P | 434.582   | P | 1530.288 | -1.572 | LOC_Os07g01820.1 |
| DG <sub>o</sub> | Os017653_01 S7 | 0.000 | -1.925 | P | 172.363   | P | 255.583   | P | 970.575  | -2.493 | LOC_Os02g33330.1 |
| DG <sub>o</sub> | Os017744_01 S7 | 0.000 | 1.558  | P | 3497.847  | P | 2655.476  | P | 901.547  | 1.956  | LOC_Os11g06750.1 |
| DG <sub>o</sub> | Os017908_01 S7 | 0.000 | 1.904  | P | 4571.905  | P | 3832.909  | P | 1024.270 | 2.158  | LOC_Os03g14450.1 |
| DG <sub>o</sub> | Os018056_01 S7 | 0.000 | -3.110 | P | 138.569   | P | 151.858   | P | 1310.740 | -3.242 | LOC_Os05g15880.1 |

|                 |             |    |        |        |   |           |   |          |   |           |        |                  |
|-----------------|-------------|----|--------|--------|---|-----------|---|----------|---|-----------|--------|------------------|
| DG <sub>o</sub> | Os018162_01 | S7 | -1.542 | 0.000  | P | 1738.834  | P | 597.020  | P | 438.601   | 1.987  | LOC_Os05g34670.1 |
| DG <sub>o</sub> | Os018260_01 | S7 | 0.000  | 2.048  | P | 1806.795  | P | 1667.597 | P | 403.146   | 2.164  | LOC_Os06g02028.1 |
| DG <sub>o</sub> | Os018479_01 | S7 | 0.000  | 1.580  | P | 893.334   | P | 695.196  | P | 232.542   | 1.942  | LOC_Os02g55560.1 |
| DG <sub>o</sub> | Os018515_01 | S7 | 0.000  | -1.578 | P | 127.200   | P | 159.809  | P | 476.959   | -1.907 | LOC_Os02g43500.2 |
| DG <sub>o</sub> | Os018886_01 | S7 | 0.000  | 2.800  | P | 10070.764 | P | 6994.262 | P | 1004.306  | 3.326  | LOC_Os07g42490.2 |
| DG <sub>o</sub> | Os019241_01 | S7 | 0.000  | -1.572 | P | 162.497   | P | 165.199  | P | 491.238   | -1.596 | LOC_Os01g09620.2 |
| DG <sub>o</sub> | Os019287_01 | S7 | 0.000  | -1.743 | P | 215.213   | P | 222.589  | P | 745.072   | -1.792 | LOC_Os01g65080.3 |
| DG <sub>o</sub> | Os019636_01 | S7 | 0.000  | -1.440 | P | 203.166   | P | 210.314  | P | 570.622   | -1.490 | -                |
| DG <sub>o</sub> | Os019688_01 | S7 | 0.000  | 1.961  | P | 3695.506  | P | 2946.381 | P | 756.974   | 2.287  | LOC_Os04g02820.2 |
| DG <sub>o</sub> | Os019891_01 | S7 | 0.000  | -1.737 | P | 113.123   | P | 169.476  | P | 564.952   | -2.320 | LOC_Os08g43334.1 |
| DG <sub>o</sub> | Os020036_01 | S7 | 0.000  | -2.338 | P | 122.508   | P | 128.221  | P | 648.210   | -2.404 | LOC_Os07g38130.1 |
| DG <sub>o</sub> | Os020201_01 | S7 | 0.000  | -2.552 | P | 967.750   | P | 874.560  | P | 5129.359  | -2.406 | LOC_Os01g03680.1 |
| DG <sub>o</sub> | Os020390_01 | S7 | 0.000  | -2.417 | P | 377.694   | P | 521.958  | P | 2787.367  | -2.884 | LOC_Os03g58070.1 |
| DG <sub>o</sub> | Os020392_01 | S7 | 0.000  | -1.998 | P | 355.978   | P | 466.862  | P | 1864.301  | -2.389 | LOC_Os03g15050.2 |
| DG <sub>o</sub> | Os020769_01 | S7 | 0.000  | -2.127 | P | 404.228   | P | 359.888  | P | 1571.991  | -1.959 | LOC_Os03g46060.1 |
| DG <sub>o</sub> | Os020983_01 | S7 | 0.000  | -1.460 | P | 173.178   | P | 220.754  | P | 607.339   | -1.810 | LOC_Os06g46410.1 |
| DG <sub>o</sub> | Os021035_01 | S7 | 0.000  | -2.333 | P | 1394.118  | P | 2191.610 | P | 11041.468 | -2.986 | -                |
| DG <sub>o</sub> | Os021097_01 | S7 | 0.000  | -1.627 | P | 388.306   | P | 446.464  | P | 1379.455  | -1.829 | LOC_Os04g24140.1 |
| DG <sub>o</sub> | Os021202_01 | S7 | 0.000  | 1.823  | P | 2449.307  | P | 2353.217 | P | 665.076   | 1.881  | LOC_Os01g55540.1 |
| DG <sub>o</sub> | Os021367_01 | S7 | 0.000  | -1.605 | P | 477.492   | P | 440.209  | P | 1338.689  | -1.487 | LOC_Os01g01410.1 |
| DG <sub>o</sub> | Os021445_01 | S7 | 0.000  | -1.827 | P | 558.032   | P | 556.238  | P | 1974.022  | -1.823 | LOC_Os08g06110.1 |
| DG <sub>o</sub> | Os021453_01 | S7 | 0.000  | -1.540 | P | 324.572   | P | 397.936  | P | 1157.063  | -1.834 | LOC_Os02g12760.1 |
| DG <sub>o</sub> | Os021495_01 | S7 | 0.000  | -1.868 | P | 168.865   | P | 215.374  | P | 786.435   | -2.219 | LOC_Os12g38640.1 |
| DG <sub>o</sub> | Os021497_01 | S7 | 0.000  | -2.039 | P | 262.624   | P | 223.018  | P | 916.733   | -1.804 | LOC_Os06g40080.1 |
| DG <sub>o</sub> | Os021643_01 | S7 | 0.000  | -1.861 | P | 133.696   | P | 177.220  | P | 643.915   | -2.268 | LOC_Os01g62610.1 |
| DG <sub>o</sub> | Os021777_01 | S7 | 0.000  | -1.512 | P | 142.608   | P | 162.487  | P | 463.445   | -1.700 | -                |
| DG <sub>o</sub> | Os021980_01 | S7 | 0.000  | -2.101 | P | 568.180   | P | 418.141  | P | 1794.472  | -1.659 | LOC_Os05g03760.1 |
| DG <sub>o</sub> | Os022003_01 | S7 | 0.000  | 1.492  | P | 1377.501  | P | 1134.591 | P | 403.343   | 1.772  | LOC_Os04g20220.1 |
| DG <sub>o</sub> | Os022154_01 | S7 | 0.000  | -1.588 | P | 131.648   | P | 144.119  | P | 433.216   | -1.718 | LOC_Os08g42100.1 |
| DG <sub>o</sub> | Os022300_01 | S7 | 0.000  | -1.948 | P | 295.846   | P | 347.761  | P | 1341.540  | -2.181 | -                |
| DG <sub>o</sub> | Os022309_01 | S7 | 0.000  | -1.811 | P | 191.749   | P | 209.859  | P | 736.577   | -1.942 | LOC_Os05g10670.1 |

|                 |                |        |        |   |           |   |           |   |           |        |                  |
|-----------------|----------------|--------|--------|---|-----------|---|-----------|---|-----------|--------|------------------|
| DG <sub>0</sub> | Os023010_01 S7 | 0.000  | 2.161  | P | 1175.687  | P | 1447.000  | P | 323.567   | 1.861  | LOC_Os01g68820.1 |
| DG <sub>0</sub> | Os023039_01 S7 | 0.000  | 2.162  | P | 818.326   | P | 1182.264  | P | 264.207   | 1.631  | LOC_Os07g34620.1 |
| DG <sub>0</sub> | Os023043_01 S7 | 0.000  | 2.394  | P | 1636.869  | P | 2010.903  | P | 382.548   | 2.097  | LOC_Os05g06480.1 |
| DG <sub>0</sub> | Os023085_01 S7 | 0.000  | 2.078  | P | 2729.773  | P | 2842.622  | P | 673.259   | 2.020  | LOC_Os05g34310.1 |
| DG <sub>0</sub> | Os023328_01 S7 | 0.000  | -2.447 | P | 276.153   | P | 187.335   | P | 1021.586  | -1.887 | LOC_Os11g18830.1 |
| DG <sub>0</sub> | Os023508_01 S7 | 0.000  | -1.753 | P | 237.831   | P | 323.829   | P | 1091.514  | -2.198 | LOC_Os08g04430.1 |
| DG <sub>0</sub> | Os023619_01 S7 | 1.879  | 0.000  | P | 355.554   | P | 1307.917  | P | 1222.049  | -1.781 | -                |
| DG <sub>0</sub> | Os023819_01 S7 | 0.000  | 2.280  | P | 1043.889  | P | 1266.167  | P | 260.716   | 2.001  | LOC_Os08g41030.1 |
| DG <sub>0</sub> | Os023934_01 S7 | 0.000  | 1.984  | P | 515.271   | P | 606.801   | P | 153.404   | 1.748  | LOC_Os10g30944.1 |
| DG <sub>0</sub> | Os024035_01 S7 | 0.000  | 2.411  | P | 7723.156  | P | 7841.582  | P | 1474.810  | 2.389  | LOC_Os10g02300.3 |
| DG <sub>0</sub> | Os024527_01 S7 | 0.000  | -2.202 | P | 217.706   | P | 200.372   | P | 922.243   | -2.083 | LOC_Os03g18230.1 |
| DG <sub>0</sub> | Os024774_01 S7 | -1.107 | -2.689 | P | 676.454   | P | 314.070   | P | 2025.993  | -1.583 | LOC_Os02g10390.1 |
| DG <sub>0</sub> | Os025211_01 S7 | 0.000  | 2.015  | P | 674.259   | P | 783.136   | P | 193.809   | 1.799  | LOC_Os11g32100.1 |
| DG <sub>0</sub> | Os025786_01 S7 | 0.000  | -1.802 | P | 302.680   | P | 284.665   | P | 992.978   | -1.714 | -                |
| DG <sub>0</sub> | Os025787_01 S7 | 0.000  | -1.713 | P | 11537.561 | P | 13779.576 | P | 45165.438 | -1.969 | LOC_Os12g04980.1 |
| DG <sub>0</sub> | Os026132_01 S7 | 0.000  | 2.815  | P | 2952.463  | P | 3740.437  | P | 531.525   | 2.474  | LOC_Os03g25350.1 |
| DG <sub>0</sub> | Os026172_01 S7 | 0.771  | 0.000  | P | 204.111   | P | 348.334   | P | 566.417   | -1.473 | LOC_Os03g19170.1 |
| DG <sub>0</sub> | Os026332_01 S7 | 0.000  | 1.847  | P | 6813.919  | P | 7512.124  | P | 2088.457  | 1.706  | LOC_Os02g50110.1 |
| DG <sub>0</sub> | Os026390_01 S7 | 1.701  | 0.000  | P | 429.393   | P | 1396.152  | P | 1209.006  | -1.493 | LOC_Os05g25040.2 |
| DG <sub>0</sub> | Os026553_01 S7 | 1.216  | 0.000  | P | 178.422   | P | 414.581   | P | 592.385   | -1.731 | LOC_Os06g08520.1 |
| DG <sub>0</sub> | Os027065_01 S7 | -0.935 | 0.000  | P | 2894.410  | P | 1513.457  | P | 812.996   | 1.832  | LOC_Os02g17210.1 |
| DG <sub>0</sub> | Os027175_01 S7 | 0.000  | -1.683 | P | 340.751   | P | 366.068   | P | 1175.599  | -1.787 | -                |
| DG <sub>0</sub> | Os027379_02 S7 | 0.000  | -1.531 | P | 396.824   | P | 389.928   | P | 1126.986  | -1.506 | -                |
| DG <sub>0</sub> | Os027602_01 S7 | 0.000  | -2.357 | P | 164.756   | P | 238.195   | P | 1219.962  | -2.888 | LOC_Os01g03380.1 |
| DG <sub>0</sub> | Os027615_01 S7 | -1.177 | -2.934 | P | 2195.492  | P | 970.909   | P | 7418.009  | -1.756 | LOC_Os09g17740.1 |
| DG <sub>0</sub> | Os027656_01 S7 | 0.000  | 1.994  | P | 5749.587  | P | 6227.379  | P | 1563.154  | 1.879  | LOC_Os10g39420.1 |
| DG <sub>0</sub> | Os028119_01 S7 | 1.509  | 0.000  | P | 122.611   | P | 348.904   | P | 773.971   | -2.658 | LOC_Os09g25910.1 |
| DG <sub>0</sub> | Os028171_01 S7 | 0.000  | 2.349  | P | 3137.164  | P | 3186.666  | P | 625.513   | 2.326  | LOC_Os04g58220.1 |
| DG <sub>0</sub> | Os028198_01 S7 | 0.756  | 0.000  | P | 173.430   | P | 292.791   | P | 510.931   | -1.559 | LOC_Os03g59010.1 |
| DG <sub>0</sub> | Os029316_01 S7 | 0.000  | 2.766  | P | 636.414   | P | 1015.172  | P | 149.197   | 2.093  | LOC_Os11g04000.1 |
| DG <sub>0</sub> | Os029603_01 S7 | 0.000  | 1.767  | P | 918.622   | P | 923.294   | P | 271.298   | 1.760  | LOC_Os10g25180.1 |

|                 |             |    |        |        |   |           |   |          |   |          |        |                  |
|-----------------|-------------|----|--------|--------|---|-----------|---|----------|---|----------|--------|------------------|
| DG <sub>0</sub> | Os029766_01 | S7 | -1.049 | 0.000  | P | 1019.379  | P | 492.543  | P | 332.796  | 1.615  | LOC_Os07g06400.1 |
| DG <sub>0</sub> | Os029802_01 | S7 | 0.958  | -1.384 | P | 140.735   | P | 273.453  | P | 713.735  | -2.342 | LOC_Os08g35580.1 |
| DG <sub>0</sub> | Os029832_01 | S7 | 1.098  | -1.593 | P | 145.930   | P | 312.306  | P | 942.020  | -2.690 | LOC_Os11g38160.1 |
| DG <sub>0</sub> | Os030085_01 | S7 | 0.000  | -2.058 | P | 163.862   | P | 183.357  | P | 763.750  | -2.221 | LOC_Os09g38670.1 |
| DG <sub>0</sub> | Os031586_01 | S7 | -1.074 | 0.000  | P | 10161.023 | P | 4827.908 | P | 1749.461 | 2.538  | LOC_Os08g08920.1 |
| DG <sub>0</sub> | Os031648_01 | S7 | 0.000  | 1.837  | P | 875.313   | P | 717.254  | P | 200.829  | 2.124  | LOC_Os07g01450.1 |
| DG <sub>0</sub> | Os032085_01 | S7 | 0.000  | -1.477 | P | 134.858   | P | 159.985  | P | 445.213  | -1.723 | LOC_Os06g10980.1 |
| DG <sub>0</sub> | Os032446_01 | S7 | -1.193 | 0.000  | P | 808.637   | P | 353.808  | P | 213.795  | 1.919  | LOC_Os01g03914.2 |
| DG <sub>0</sub> | Os032470_01 | S7 | 0.000  | 1.621  | P | 535.849   | P | 368.464  | P | 119.830  | 2.161  | LOC_Os08g04290.1 |
| DG <sub>0</sub> | Os032727_01 | S7 | 0.000  | -1.618 | P | 427.708   | P | 630.721  | P | 1936.533 | -2.179 | LOC_Os08g04520.1 |
| DG <sub>0</sub> | Os032876_01 | S7 | 0.954  | 0.000  | P | 228.073   | P | 441.866  | P | 720.692  | -1.660 | LOC_Os12g32160.1 |
| DG <sub>0</sub> | Os033148_01 | S7 | 1.576  | 0.000  | P | 173.264   | P | 516.419  | P | 1189.402 | -2.779 | LOC_Os08g32550.1 |
| DG <sub>0</sub> | Os033559_01 | S7 | 0.795  | -2.169 | P | 524.563   | P | 909.852  | P | 4090.591 | -2.963 | LOC_Os09g19550.1 |
| DG <sub>0</sub> | Os034533_01 | S7 | 0.000  | -1.528 | P | 363.012   | P | 384.220  | P | 1107.753 | -1.610 | LOC_Os05g12270.1 |
| DG <sub>0</sub> | Os034649_01 | S7 | -1.019 | -2.743 | P | 1484.496  | P | 732.596  | P | 4905.739 | -1.724 | LOC_Os11g47980.1 |
| DG <sub>0</sub> | Os034855_01 | S7 | 1.167  | 0.000  | P | 153.606   | P | 345.016  | P | 567.969  | -1.887 | LOC_Os11g10330.1 |
| DG <sub>0</sub> | Os034873_01 | S7 | 0.000  | 2.391  | P | 1301.295  | P | 799.958  | P | 152.506  | 3.093  | LOC_Os11g38720.1 |
| DG <sub>0</sub> | Os035044_01 | S7 | 0.000  | -3.200 | P | 307.893   | P | 288.185  | P | 2649.186 | -3.105 | LOC_Os05g15920.1 |
| DG <sub>0</sub> | Os035077_01 | S7 | 0.000  | -1.712 | P | 367.200   | P | 366.229  | P | 1199.870 | -1.708 | LOC_Os10g30690.1 |
| DG <sub>0</sub> | Os035342_01 | S7 | -1.711 | 0.000  | P | 1072.365  | P | 327.456  | P | 326.414  | 1.716  | LOC_Os12g21870.1 |
| DG <sub>0</sub> | Os035826_01 | S7 | 0.000  | -1.748 | P | 441.956   | P | 512.166  | P | 1720.130 | -1.961 | -                |
| DG <sub>0</sub> | Os035987_01 | S7 | 1.507  | 0.000  | P | 114.923   | P | 326.669  | P | 418.469  | -1.864 | LOC_Os08g44110.1 |
| DG <sub>0</sub> | Os036068_01 | S7 | 0.000  | 1.984  | P | 1355.299  | P | 1661.245 | P | 419.956  | 1.690  | LOC_Os12g07490.1 |
| DG <sub>0</sub> | Os037041_01 | S7 | 0.000  | 2.307  | P | 1423.806  | P | 983.201  | P | 198.639  | 2.842  | -                |
| DG <sub>0</sub> | Os037162_01 | S7 | 0.000  | 2.046  | P | 497.853   | P | 628.728  | P | 152.219  | 1.710  | LOC_Os04g28120.1 |
| DG <sub>0</sub> | Os037732_01 | S7 | 1.877  | 0.000  | P | 158.107   | P | 580.834  | P | 448.665  | -1.505 | LOC_Os01g10590.1 |
| DG <sub>0</sub> | Os037857_01 | S7 | 0.000  | 2.617  | P | 7827.502  | P | 7909.976 | P | 1289.162 | 2.602  | LOC_Os01g42234.1 |
| DG <sub>0</sub> | Os038961_01 | S7 | -1.102 | 0.000  | P | 1361.908  | P | 634.329  | P | 342.214  | 1.993  | LOC_Os03g46560.1 |
| DG <sub>0</sub> | Os039064_01 | S7 | 0.000  | 1.582  | P | 623.128   | P | 578.558  | P | 193.222  | 1.689  | LOC_Os03g12230.1 |
| DG <sub>0</sub> | Os039503_01 | S7 | 0.000  | -1.406 | P | 176.634   | P | 225.974  | P | 599.004  | -1.762 | -                |
| DG <sub>0</sub> | Os040593_01 | S7 | 0.000  | 1.589  | P | 1064.994  | P | 738.446  | P | 245.438  | 2.117  | LOC_Os01g34614.1 |

|                 |                |        |        |   |          |   |          |   |           |        |                  |
|-----------------|----------------|--------|--------|---|----------|---|----------|---|-----------|--------|------------------|
| DG <sub>0</sub> | Os040743_01 S7 | 0.000  | 1.903  | P | 900.911  | P | 534.409  | P | 142.868   | 2.657  | LOC_Os07g05510.1 |
| DG <sub>0</sub> | Os042866_01 S7 | -1.414 | 0.000  | P | 2037.558 | P | 764.723  | P | 334.493   | 2.607  | LOC_Os10g05820.1 |
| DG <sub>0</sub> | Os044467_01 S7 | 0.000  | -1.642 | P | 211.940  | P | 211.007  | P | 658.508   | -1.636 | LOC_Os03g63310.1 |
| DG <sub>0</sub> | Os044853_01 S7 | 0.000  | -2.214 | P | 216.515  | P | 312.416  | P | 1449.789  | -2.743 | LOC_Os02g13620.1 |
| DG <sub>0</sub> | Os045347_01 S7 | 0.000  | -2.135 | P | 190.934  | P | 279.136  | P | 1225.967  | -2.683 | LOC_Os06g18120.1 |
| DG <sub>0</sub> | Os045461_01 S7 | 0.000  | -2.423 | P | 689.914  | P | 428.184  | P | 2295.518  | -1.734 | LOC_Os05g48630.2 |
| DG <sub>0</sub> | Os045565_01 S7 | 1.024  | -1.514 | P | 169.472  | P | 344.620  | P | 984.039   | -2.538 | LOC_Os10g09630.1 |
| DG <sub>0</sub> | Os046493_01 S7 | 0.000  | -1.391 | P | 167.819  | P | 216.202  | P | 566.879   | -1.756 | LOC_Os11g39640.1 |
| DG <sub>0</sub> | Os046577_01 S7 | 0.000  | -2.016 | P | 1646.116 | P | 1943.425 | P | 7858.466  | -2.255 | -                |
| DG <sub>0</sub> | Os046888_01 S7 | 0.000  | -1.804 | P | 761.626  | P | 863.487  | P | 3015.609  | -1.985 | LOC_Os03g25460.1 |
| DG <sub>0</sub> | Os047467_01 S7 | 0.000  | -2.198 | P | 705.619  | P | 860.211  | P | 3946.266  | -2.484 | LOC_Os08g05160.1 |
| DG <sub>0</sub> | Os047586_01 S7 | 0.000  | -1.451 | P | 149.686  | P | 170.364  | P | 465.784   | -1.638 | LOC_Os11g24230.1 |
| DG <sub>0</sub> | Os048781_01 S7 | 1.147  | 0.000  | P | 134.579  | P | 298.038  | P | 418.796   | -1.638 | -                |
| DG <sub>0</sub> | Os049499_01 S7 | -1.682 | 0.000  | P | 2114.017 | P | 658.892  | P | 634.524   | 1.736  | LOC_Os05g27000.1 |
| DG <sub>0</sub> | Os049591_01 S7 | 0.000  | 2.078  | P | 1272.594 | P | 1724.672 | P | 408.601   | 1.639  | LOC_Os10g04500.1 |
| DG <sub>0</sub> | Os050541_01 S7 | 0.000  | -1.621 | P | 172.683  | P | 209.566  | P | 644.526   | -1.900 | LOC_Os12g31390.1 |
| DG <sub>0</sub> | Os050925_01 S7 | 0.000  | -2.754 | P | 217.502  | P | 357.996  | P | 2414.344  | -3.473 | LOC_Os01g61840.1 |
| DG <sub>0</sub> | Os051250_01 S7 | 0.975  | -1.701 | P | 192.467  | P | 378.437  | P | 1230.215  | -2.676 | -                |
| DG <sub>0</sub> | Os051935_01 S7 | 0.000  | -3.831 | P | 967.786  | P | 999.077  | P | 14215.834 | -3.877 | LOC_Os01g15270.1 |
| DG <sub>0</sub> | Os051962_01 S7 | 0.000  | -2.386 | P | 429.622  | P | 312.333  | P | 1632.140  | -1.926 | LOC_Os02g26700.1 |
| DG <sub>0</sub> | Os051968_01 S7 | 0.000  | -2.146 | P | 289.607  | P | 227.963  | P | 1009.188  | -1.801 | LOC_Os03g08500.1 |
| DG <sub>0</sub> | Os051973_01 S7 | 0.000  | -2.182 | P | 349.470  | P | 253.488  | P | 1150.307  | -1.719 | LOC_Os01g45274.1 |
| DG <sub>0</sub> | Os051974_01 S7 | 0.000  | -3.044 | P | 131.774  | P | 139.432  | P | 1149.933  | -3.125 | LOC_Os01g03360.1 |
| DG <sub>0</sub> | Os051978_01 S7 | 0.000  | 3.244  | P | 8267.735 | P | 5307.072 | P | 560.347   | 3.883  | LOC_Os03g28330.4 |
| DG <sub>0</sub> | Os051981_01 S7 | 0.000  | -2.244 | P | 1305.158 | P | 982.874  | P | 4656.545  | -1.835 | LOC_Os11g47809.1 |
| DG <sub>0</sub> | Os051998_01 S7 | 0.000  | -2.112 | P | 809.017  | P | 547.531  | P | 2367.138  | -1.549 | LOC_Os12g08770.1 |
| DG <sub>0</sub> | Os052004_01 S7 | 0.000  | 2.235  | P | 5881.218 | P | 7366.851 | P | 1565.005  | 1.910  | LOC_Os11g09280.2 |
| DG <sub>0</sub> | Os052088_01 S7 | -1.704 | 0.000  | P | 819.660  | P | 251.622  | P | 189.071   | 2.116  | LOC_Os03g14630.1 |
| DG <sub>0</sub> | Os052111_01 S7 | 0.000  | -2.045 | P | 305.276  | P | 435.141  | P | 1795.964  | -2.557 | LOC_Os09g31482.3 |
| DG <sub>0</sub> | Os052210_01 S7 | 0.000  | 1.750  | P | 1549.583 | P | 1306.386 | P | 388.424   | 1.996  | LOC_Os05g28280.1 |
| DG <sub>0</sub> | Os052257_01 S7 | 0.000  | 1.760  | P | 981.985  | P | 1015.006 | P | 299.781   | 1.712  | LOC_Os03g64210.1 |

|                 |             |    |        |        |   |           |   |           |   |           |        |                  |
|-----------------|-------------|----|--------|--------|---|-----------|---|-----------|---|-----------|--------|------------------|
| DG <sub>o</sub> | Os052280_01 | S7 | 0.000  | 1.732  | P | 4557.333  | P | 3080.123  | P | 927.089   | 2.297  | LOC_Os03g29260.2 |
| DG <sub>o</sub> | Os052285_01 | S7 | -0.811 | 0.000  | P | 3318.931  | P | 1891.244  | P | 944.012   | 1.814  | LOC_Os03g01270.1 |
| DG <sub>o</sub> | Os052307_01 | S7 | 0.000  | 2.736  | P | 23835.891 | P | 26090.087 | P | 3917.146  | 2.605  | LOC_Os03g31750.1 |
| DG <sub>o</sub> | Os052328_01 | S7 | 0.000  | 1.512  | P | 722.585   | P | 535.422   | P | 187.692   | 1.945  | LOC_Os03g26970.1 |
| DG <sub>o</sub> | Os052485_01 | S7 | 0.000  | 1.831  | P | 606.205   | P | 536.269   | P | 150.741   | 2.008  | LOC_Os04g33590.1 |
| DG <sub>o</sub> | Os052782_02 | S7 | 0.000  | -4.141 | P | 283.893   | P | 356.146   | P | 6281.370  | -4.468 | -                |
| DG <sub>o</sub> | Os052819_01 | S7 | 1.150  | -2.369 | P | 162.315   | P | 360.143   | P | 1860.656  | -3.519 | -                |
| DG <sub>o</sub> | Os052906_01 | S7 | 0.000  | -1.517 | P | 191.979   | P | 189.755   | P | 543.014   | -1.500 | LOC_Os09g21740.1 |
| DG <sub>o</sub> | Os053316_01 | S7 | 0.000  | -1.452 | P | 173.361   | P | 209.576   | P | 573.519   | -1.726 | LOC_Os01g71690.1 |
| DG <sub>o</sub> | Os054176_02 | S7 | 0.000  | 1.586  | P | 2469.234  | P | 2167.828  | P | 722.205   | 1.774  | -                |
| DG <sub>o</sub> | Os054362_01 | S7 | 1.412  | 0.000  | P | 9415.547  | P | 25053.708 | P | 28134.379 | -1.579 | LOC_Os05g26350.1 |
| DG <sub>o</sub> | Os054377_01 | S7 | 0.000  | -1.504 | P | 276.054   | P | 377.099   | P | 1069.773  | -1.954 | LOC_Os05g31140.1 |
| DG <sub>o</sub> | Os054419_01 | S7 | -1.343 | -2.863 | P | 1093.950  | P | 431.275   | P | 3137.910  | -1.520 | LOC_Os01g31690.1 |
| DG <sub>o</sub> | Os054431_01 | S7 | 0.000  | -2.003 | P | 1373.088  | P | 1283.293  | P | 5142.145  | -1.905 | LOC_Os12g38064.1 |
| DG <sub>o</sub> | Os054436_01 | S7 | 0.825  | -2.070 | P | 489.141   | P | 866.797   | P | 3639.737  | -2.896 | LOC_Os09g39780.2 |
| DG <sub>o</sub> | Os054455_01 | S7 | 0.000  | 1.511  | P | 3849.198  | P | 3424.180  | P | 1201.467  | 1.680  | LOC_Os08g03640.1 |
| DG <sub>o</sub> | Os054477_01 | S7 | 0.000  | 1.987  | P | 7372.988  | P | 6432.810  | P | 1622.860  | 2.184  | LOC_Os04g46200.1 |
| DG <sub>o</sub> | Os054478_01 | S7 | 0.000  | 1.515  | P | 3803.449  | P | 2994.472  | P | 1047.675  | 1.860  | LOC_Os10g41410.2 |
| DG <sub>o</sub> | Os054485_01 | S7 | 0.000  | -1.654 | P | 245.701   | P | 251.244   | P | 790.930   | -1.687 | LOC_Os10g39130.1 |
| DG <sub>o</sub> | Os054491_01 | S7 | 0.000  | -1.603 | P | 338.926   | P | 311.525   | P | 946.202   | -1.481 | -                |
| DG <sub>o</sub> | Os054518_01 | S7 | 0.000  | -1.979 | P | 547.808   | P | 422.859   | P | 1666.811  | -1.605 | LOC_Os04g16680.1 |
| DG <sub>o</sub> | Os054538_01 | S7 | 0.000  | 2.069  | P | 17492.436 | P | 21924.075 | P | 5223.507  | 1.744  | LOC_Os05g33570.1 |
| DG <sub>o</sub> | Os054562_01 | S7 | 0.000  | -2.464 | P | 251.857   | P | 310.493   | P | 1713.545  | -2.766 | LOC_Os01g21250.1 |
| DG <sub>o</sub> | Os054570_01 | S7 | 0.000  | -2.159 | P | 2017.011  | P | 1722.837  | P | 7695.336  | -1.932 | LOC_Os12g36880.1 |
| DG <sub>o</sub> | Os054571_01 | S7 | -0.873 | 2.139  | P | 15874.791 | P | 8670.557  | P | 1967.984  | 3.012  | LOC_Os08g08960.1 |
| DG <sub>o</sub> | Os054578_01 | S7 | 0.000  | -2.619 | P | 414.139   | P | 458.257   | P | 2816.096  | -2.766 | LOC_Os02g39630.2 |
| DG <sub>o</sub> | Os054595_01 | S7 | 0.000  | 1.536  | P | 3024.637  | P | 2500.594  | P | 862.511   | 1.810  | LOC_Os04g32950.1 |
| DG <sub>o</sub> | Os054602_01 | S7 | 0.000  | -2.536 | P | 118.163   | P | 182.111   | P | 1055.918  | -3.160 | LOC_Os08g35190.2 |
| DG <sub>o</sub> | Os054627_01 | S7 | 0.000  | -2.749 | P | 193.034   | P | 203.488   | P | 1368.354  | -2.826 | LOC_Os01g73940.1 |
| DG <sub>o</sub> | Os054659_01 | S7 | 0.000  | -1.681 | P | 318.948   | P | 339.811   | P | 1089.381  | -1.772 | LOC_Os01g07760.2 |
| DG <sub>o</sub> | Os054660_01 | S7 | 0.000  | -2.040 | P | 478.643   | P | 437.502   | P | 1799.798  | -1.911 | LOC_Os04g41560.2 |



|                 |                |        |        |   |          |   |          |   |          |        |                  |
|-----------------|----------------|--------|--------|---|----------|---|----------|---|----------|--------|------------------|
| DG <sub>0</sub> | Os054673_01 S7 | 0.000  | -1.507 | P | 448.826  | P | 461.803  | P | 1312.729 | -1.548 | LOC_Os03g55540.1 |
| DG <sub>0</sub> | Os054699_01 S7 | 0.000  | -2.171 | P | 465.775  | P | 696.822  | P | 3137.987 | -2.752 | -                |
| DG <sub>0</sub> | Os054725_01 S7 | 1.144  | 0.000  | P | 426.495  | P | 942.562  | P | 1349.527 | -1.662 | LOC_Os07g11310.1 |
| DG <sub>0</sub> | Os054727_01 S7 | 0.000  | -1.396 | P | 174.678  | P | 197.269  | P | 519.191  | -1.572 | LOC_Os01g61670.1 |
| DG <sub>0</sub> | Os054745_01 S7 | 0.000  | -2.377 | P | 862.457  | P | 561.561  | P | 2917.837 | -1.758 | LOC_Os07g37030.1 |
| DG <sub>0</sub> | Os054789_01 S7 | 0.000  | 1.600  | P | 1180.806 | P | 1014.685 | P | 334.629  | 1.819  | LOC_Os05g50380.1 |
| DG <sub>0</sub> | Os054921_01 S7 | 0.000  | 1.620  | P | 547.418  | P | 473.436  | P | 154.036  | 1.829  | LOC_Os02g06650.1 |
| DG <sub>0</sub> | Os055074_01 S7 | 0.000  | -1.694 | P | 582.430  | P | 724.894  | P | 2345.201 | -2.010 | LOC_Os07g43770.1 |
| DG <sub>0</sub> | Os055308_01 S7 | 0.000  | -2.159 | P | 419.223  | P | 524.332  | P | 2341.945 | -2.482 | LOC_Os07g48020.1 |
| DG <sub>0</sub> | Os055414_01 S7 | 0.000  | -1.853 | P | 250.739  | P | 244.498  | P | 882.966  | -1.816 | LOC_Os11g33120.1 |
| DG <sub>0</sub> | Os055567_01 S7 | 0.000  | -2.042 | P | 155.814  | P | 145.323  | P | 598.518  | -1.942 | LOC_Os07g46330.1 |
| DG <sub>0</sub> | Os055618_01 S7 | 0.000  | 2.155  | P | 644.416  | P | 744.334  | P | 167.102  | 1.947  | LOC_Os02g19420.1 |
| DG <sub>0</sub> | Os055646_01 S7 | -0.877 | 0.000  | P | 2098.749 | P | 1143.131 | P | 412.793  | 2.346  | LOC_Os12g29670.1 |
| DG <sub>0</sub> | Os055707_01 S7 | 0.000  | -1.535 | P | 969.843  | P | 1036.500 | P | 3004.108 | -1.631 | LOC_Os04g47990.1 |
| DG <sub>0</sub> | Os056324_01 S7 | 1.082  | 0.000  | P | 164.488  | P | 348.140  | P | 646.389  | -1.974 | -                |
| DG <sub>0</sub> | Os056838_01 S7 | -1.297 | 0.000  | P | 2495.679 | P | 1015.843 | P | 732.762  | 1.768  | LOC_Os04g41970.1 |
| DG <sub>0</sub> | Os056928_02 S7 | 0.000  | -2.359 | P | 232.888  | P | 212.590  | P | 1090.483 | -2.227 | LOC_Os09g27030.3 |
| DG <sub>0</sub> | Os056942_02 S7 | 1.135  | 0.000  | P | 266.314  | P | 584.839  | P | 739.865  | -1.474 | LOC_Os09g23110.1 |
| DG <sub>0</sub> | Os057030_02 S7 | 1.154  | 0.000  | P | 171.559  | P | 381.774  | P | 825.043  | -2.266 | LOC_Os07g39470.1 |
| DG <sub>0</sub> | Os057070_02 S7 | 0.000  | -2.581 | P | 400.921  | P | 415.569  | P | 2486.430 | -2.633 | -                |
| DG <sub>0</sub> | Os057245_02 S7 | 0.000  | -1.909 | P | 199.196  | P | 196.590  | P | 738.112  | -1.890 | LOC_Os07g48010.1 |
